# Supplementary material for: Machine learning approach for accurate backmapping of coarse-grained models to all-atom models
Source: Royal Society of Chemistry journal article supplement (doi:10.1039/d0cc02651d), 2020-01-01
Supplement: d0cc02651d1.xlsx [file d0cc02651d1.xlsx]

## Sheet: data_benzene
	x_C1_cg	x coordinate of the bead c1 in the coarse-grain(cg) model of benzene
	y_C1_cg	y coordinate of the bead c1 in the coarse-grain(cg) model of benzene
	z_C1_cg	z coordinate of the bead c1 in the coarse-grain(cg) model of benzene
	x_C1_aa	x coordinate of the atom c1 in the all-atom (aa) model of benzene
	y_C1_aa	y coordinate of the atom c1 in the all-atom (aa) model of benzene
	z_C1_aa	z coordinate of the atom c1 in the all-atom (aa) model of benzene
x_C1_cg	y_C1_cg	z_C1_cg	x_C2_cg	y_C2_cg	z_C2_cg	x_C3_cg	y_C3_cg	z_C3_cg	x_C1_aa	y_C1_aa	z_C1_aa	x_C2_aa	y_C2_aa	z_C2_aa	x_C3_aa	y_C3_aa	z_C3_aa	x_C4_aa	y_C4_aa	z_C4_aa	x_C5_aa	y_C5_aa	z_C5_aa	x_C6_aa	y_C6_aa	z_C6_aa	x_H1_aa	y_H1_aa	z_H1_aa	x_H2_aa	y_H2_aa	z_H2_aa	x_H3_aa	y_H3_aa	z_H3_aa	x_H4_aa	y_H4_aa	z_H4_aa	x_H5_aa	y_H5_aa	z_H5_aa	x_H6_aa	y_H6_aa	z_H6_aa
-0.127	1.271	-0.001	-1.001	-0.735	-0.303	1.147	-0.514	0.303	0.548	1.267	0.211	-0.787	1.135	-0.211	-1.334	-0.125	-0.429	-0.555	-1.259	-0.146	0.808	-1.114	0.19	1.363	0.148	0.383	0.967	2.212	0.311	-1.412	2.001	-0.329	-2.346	-0.254	-0.777	-0.996	-2.236	-0.2	1.364	-2.037	0.317	2.38	0.264	0.68
-0.123	1.029	0.813	-1.015	-0.463	-0.651	1.134	-0.596	-0.083	0.577	0.899	0.942	-0.808	1.038	0.611	-1.316	0.097	-0.335	-0.608	-0.982	-0.884	0.757	-1.05	-0.498	1.386	-0.072	0.352	0.988	1.624	1.594	-1.421	1.882	0.901	-2.317	0.294	-0.711	-0.979	-1.704	-1.567	1.286	-1.841	-1.017	2.453	-0.184	0.613
0.42	0.556	1.106	-1.239	-0.003	-0.271	0.845	-0.605	-0.773	1.04	0.311	0.865	-0.241	0.726	1.225	-1.265	0.32	0.366	-1.073	-0.33	-0.869	0.252	-0.723	-1.156	1.352	-0.426	-0.284	1.757	0.602	1.587	-0.414	1.415	2.068	-2.253	0.66	0.532	-1.873	-0.633	-1.535	0.421	-1.29	-2.135	2.299	-0.632	-0.665
0.955	0.838	-0.089	-1.131	0.363	0.463	0.14	-1.211	-0.423	1.282	0.3	-0.381	0.519	1.277	0.213	-0.786	0.955	0.581	-1.35	-0.271	0.275	-0.525	-1.292	-0.201	0.775	-0.994	-0.603	2.317	0.518	-0.706	0.884	2.326	0.419	-1.41	1.727	1.027	-2.349	-0.49	0.723	-0.784	-2.278	-0.325	1.428	-1.777	-1.022
0.899	-0.058	-0.94	0.146	0.777	1.048	-1.042	-0.769	-0.1	0.489	-0.562	-1.226	1.217	0.432	-0.551	0.73	0.943	0.729	-0.47	0.532	1.257	-1.169	-0.513	0.515	-0.792	-0.95	-0.704	0.787	-0.833	-2.153	2.086	0.879	-0.947	1.446	1.671	1.206	-0.779	0.833	2.193	-2.103	-0.824	0.941	-1.442	-1.61	-1.26
0.428	-0.185	-1.183	0.8	0.299	0.95	-1.283	-0.15	0.243	-0.229	-0.348	-1.321	1.032	-0.01	-0.904	1.292	0.258	0.472	0.203	0.302	1.327	-1.127	-0.038	0.914	-1.302	-0.248	-0.465	-0.359	-0.512	-2.386	1.845	0.004	-1.656	2.313	0.503	0.716	0.523	0.544	2.379	-1.852	0.02	1.659	-2.34	-0.474	-0.737
-0.128	-0.707	-1.066	1.14	0.482	0.313	-1.021	0.248	0.734	-0.807	-0.778	-0.859	0.561	-0.552	-1.155	1.37	0.155	-0.277	0.786	0.764	0.87	-0.59	0.651	1.092	-1.338	-0.186	0.281	-1.344	-1.478	-1.477	0.976	-0.941	-2.072	2.425	0.198	-0.584	1.35	1.308	1.595	-1.015	1.231	1.973	-2.374	-0.371	0.612
-0.729	-0.468	-0.956	0.725	-0.796	0.706	-0.031	1.262	0.303	-0.946	0.226	-1.054	-0.434	-1.111	-0.743	0.449	-1.273	0.306	0.918	-0.224	1.038	0.46	1.086	0.81	-0.53	1.294	-0.232	-1.516	0.358	-1.927	-0.871	-1.892	-1.364	0.749	-2.271	0.498	1.686	-0.441	1.736	0.849	1.921	1.401	-0.815	2.328	-0.469
-0.904	-0.569	-0.691	1.131	-0.568	0.153	-0.174	1.213	0.465	-1.267	0.041	-0.605	-0.424	-1.098	-0.728	0.807	-1.062	-0.208	1.328	0.003	0.483	0.48	1.137	0.766	-0.8	1.157	0.119	-2.304	-0.087	-0.983	-0.89	-2.031	-0.991	1.444	-1.918	-0.27	2.32	-0.142	0.942	0.778	2.033	1.268	-1.47	1.966	0.207
-1.136	-0.273	0.471	0.87	-0.897	-0.116	0.296	1.188	-0.315	-1.268	0.391	0.34	-0.872	-0.91	0.551	0.366	-1.281	0.196	1.286	-0.395	-0.399	0.914	0.903	-0.469	-0.356	1.335	-0.124	-2.223	0.784	0.669	-1.618	-1.643	0.891	0.656	-2.342	0.241	2.123	-0.852	-0.812	1.621	1.644	-0.931	-0.63	2.365	-0.152
-0.793	-1.016	0.131	1.141	-0.145	-0.564	-0.332	1.127	0.515	-1.201	-0.564	0.488	-0.303	-1.355	-0.246	0.912	-0.822	-0.67	1.249	0.535	-0.369	0.28	1.319	0.274	-0.9	0.807	0.716	-2.084	-1.003	0.954	-0.479	-2.381	-0.444	1.551	-1.332	-1.372	2.176	1.009	-0.819	0.526	2.406	0.357	-1.728	1.383	1.13
-0.384	-1.181	-0.42	1.19	0.206	0.455	-0.852	0.936	0.07	-0.961	-0.833	-0.548	0.235	-1.403	-0.232	1.254	-0.487	0.243	0.983	0.872	0.64	-0.32	1.281	0.4	-1.298	0.477	-0.254	-1.737	-1.483	-0.968	0.49	-2.378	-0.581	2.34	-0.793	0.187	1.722	1.52	1.054	-0.494	2.34	0.536	-2.214	0.887	-0.477
-0.371	-1.122	0.468	1.215	0.433	0.236	-0.855	0.735	-0.634	-0.982	-0.908	0.169	0.277	-1.211	0.703	1.277	-0.178	0.592	1.012	1.004	-0.12	-0.274	1.158	-0.703	-1.338	0.245	-0.474	-1.681	-1.715	0.325	0.491	-2.004	1.381	2.335	-0.345	0.804	1.765	1.69	-0.337	-0.56	1.955	-1.393	-2.323	0.308	-0.947
-0.614	-1.081	-0.284	1.118	0.256	-0.511	-0.537	0.837	0.791	-1.116	-0.806	0.119	-0.058	-1.224	-0.66	1.032	-0.388	-0.753	1.084	0.875	-0.203	0.022	1.203	0.643	-1.045	0.367	0.847	-1.89	-1.507	0.14	0.002	-2.243	-1.027	1.723	-0.737	-1.457	1.929	1.537	-0.33	0.131	2.133	1.22	-1.814	0.789	1.462
-0.631	-0.569	0.964	0.673	-0.684	-0.839	-0.092	1.251	-0.151	-0.869	0.11	1.079	-0.327	-1.191	0.738	0.488	-1.216	-0.412	0.767	-0.07	-1.181	0.331	1.121	-0.691	-0.508	1.24	0.406	-1.483	0.2	1.937	-0.549	-2.015	1.313	0.899	-2.202	-0.732	1.52	-0.139	-1.958	0.527	1.997	-1.3	-0.795	2.165	0.801
-0.513	-0.227	1.18	0.34	-0.985	-0.792	0.078	1.236	-0.419	-0.548	0.498	1.217	-0.426	-0.919	1.01	0.123	-1.384	-0.211	0.502	-0.483	-1.284	0.343	0.915	-0.987	-0.219	1.43	0.184	-0.931	0.875	2.219	-0.719	-1.725	1.737	0.303	-2.441	-0.468	1.03	-0.753	-2.171	0.781	1.511	-1.68	-0.239	2.476	0.435
-0.344	0.348	1.225	0.201	-1.219	-0.304	0.075	0.903	-0.906	-0.395	0.981	0.951	-0.272	-0.32	1.357	0.006	-1.315	0.369	0.351	-0.988	-0.949	0.285	0.378	-1.308	-0.136	1.341	-0.384	-0.628	1.743	1.719	-0.314	-0.632	2.435	0.282	-2.276	0.703	0.658	-1.759	-1.645	0.384	0.583	-2.395	-0.22	2.264	-0.853
0.184	-0.392	1.203	0.462	-0.694	-0.985	-0.709	1.065	-0.207	-0.183	0.165	1.365	0.524	-0.914	0.905	0.749	-1.083	-0.502	0.118	-0.223	-1.36	-0.629	0.892	-0.905	-0.727	1.111	0.522	-0.376	0.35	2.405	1.057	-1.566	1.607	1.366	-1.938	-0.909	0.253	-0.419	-2.356	-0.93	1.609	-1.632	-1.223	2.014	0.86
0.545	0.143	1.165	-0.739	-1.002	-0.191	0.17	0.858	-0.955	0.807	0.701	0.831	0.218	-0.435	1.37	-0.554	-1.156	0.497	-0.844	-0.728	-0.854	-0.303	0.463	-1.331	0.618	1.152	-0.468	1.447	1.263	1.511	0.406	-0.746	2.348	-0.887	-2.093	0.808	-1.54	-1.339	-1.486	-0.473	0.845	-2.35	1.106	2.073	-0.877
0.701	1.01	-0.285	-0.305	-0.281	1.223	-0.373	-0.732	-0.933	0.603	0.823	-0.935	0.725	1.076	0.39	0.054	0.336	1.325	-0.636	-0.862	0.992	-0.623	-1.118	-0.371	-0.07	-0.261	-1.388	0.978	1.636	-1.645	1.308	1.834	0.778	0.173	0.571	2.37	-1.133	-1.557	1.62	-1.189	-1.963	-0.733	-0.191	-0.516	-2.402
0.205	1.188	0.356	0.026	-0.883	0.889	-0.215	-0.354	-1.228	0.075	1.251	-0.336	0.319	0.981	1.022	0.181	-0.318	1.298	-0.127	-1.353	0.365	-0.255	-1.018	-0.968	-0.155	0.342	-1.341	0.098	2.286	-0.708	0.503	1.812	1.716	0.339	-0.549	2.365	-0.314	-2.348	0.774	-0.458	-1.739	-1.763	-0.206	0.653	-2.425
0.494	-0.085	1.161	-1.014	-0.717	-0.325	0.556	0.768	-0.882	0.974	0.369	0.902	-0.033	-0.537	1.274	-0.933	-0.958	0.349	-0.967	-0.403	-0.974	0.014	0.531	-1.283	1.031	0.919	-0.378	1.649	0.59	1.734	-0.101	-0.791	2.322	-1.761	-1.659	0.673	-1.783	-0.638	-1.629	0.041	1.038	-2.241	1.869	1.54	-0.747
0.18	-0.536	1.125	-0.876	-0.489	-0.793	0.707	1.031	-0.355	0.669	-0.034	1.222	-0.327	-0.983	0.9	-1.031	-0.94	-0.257	-0.62	0.02	-1.242	0.36	0.969	-0.976	0.976	0.981	0.297	1.12	-0.007	2.143	-0.541	-1.723	1.606	-1.857	-1.606	-0.428	-1.09	-0.074	-2.198	0.742	1.633	-1.718	1.598	1.762	0.65
0.491	-0.254	1.174	-0.805	-0.795	-0.534	0.374	1.035	-0.656	0.808	0.329	1.101	0.123	-0.814	1.112	-0.692	-1.193	0.06	-0.814	-0.309	-1.071	-0.078	0.854	-1.159	0.795	1.101	-0.081	1.414	0.687	1.983	0.177	-1.475	1.971	-1.273	-2.078	0.083	-1.566	-0.547	-1.838	-0.095	1.385	-2.104	1.202	2.061	-0.055
0.164	-0.343	1.231	-0.784	-0.702	-0.717	0.6	1.089	-0.471	0.636	0.213	1.238	-0.314	-0.86	1.085	-0.932	-1.062	-0.131	-0.562	-0.261	-1.21	0.26	0.908	-1.068	0.864	1.165	0.187	1.078	0.319	2.241	-0.683	-1.48	1.876	-1.595	-1.979	-0.306	-0.851	-0.401	-2.235	0.601	1.417	-1.949	1.499	2.022	0.271
-0.559	0.311	1.145	-0.397	-1.026	-0.676	0.919	0.744	-0.5	-0.128	0.881	1.13	-0.943	-0.276	1.025	-0.784	-1.134	-0.093	0.041	-0.818	-1.184	0.91	0.292	-1.063	0.815	1.122	0.109	-0.133	1.453	2.015	-1.547	-0.62	1.868	-1.443	-1.948	-0.121	0.034	-1.308	-2.131	1.669	0.495	-1.83	1.51	1.862	0.275
-0.428	0.309	1.136	-0.822	-0.456	-0.871	1.241	0.179	-0.307	0.252	0.496	1.229	-1.063	0.082	0.902	-1.281	-0.424	-0.387	-0.273	-0.416	-1.258	1.075	-0.089	-0.925	1.266	0.425	0.338	0.404	0.997	2.237	-1.795	0.102	1.689	-2.226	-0.909	-0.695	-0.506	-0.874	-2.198	1.897	-0.181	-1.651	2.25	0.79	0.718
-0.397	-0.143	1.223	-0.694	-0.438	-1.007	1.081	0.62	-0.218	0.215	0.155	1.41	-0.966	-0.421	0.9	-1.116	-0.585	-0.484	-0.193	-0.222	-1.422	0.907	0.495	-0.891	1.131	0.67	0.481	0.333	0.31	2.483	-1.639	-0.825	1.579	-1.95	-1.213	-0.787	-0.375	-0.499	-2.522	1.66	0.905	-1.587	1.993	1.229	0.84
1.117	0.635	0.087	-0.806	-0.022	1.031	-0.305	-0.663	-1.072	1.234	0.378	-0.556	0.869	0.826	0.725	-0.302	0.366	1.369	-1.213	-0.419	0.587	-0.9	-0.82	-0.73	0.326	-0.45	-1.288	2.17	0.621	-0.988	1.62	1.434	1.2	-0.63	0.768	2.396	-2.138	-0.702	0.935	-1.622	-1.346	-1.314	0.586	-0.657	-2.337
0.805	0.993	0.096	-0.583	-0.462	1.074	-0.331	-0.44	-1.159	0.863	0.954	-0.604	0.637	0.938	0.795	-0.227	0.015	1.428	-0.892	-0.875	0.593	-0.701	-0.881	-0.8	0.066	0.065	-1.386	1.652	1.488	-1.132	1.276	1.617	1.329	-0.22	-0.088	2.519	-1.489	-1.592	1.135	-1.23	-1.587	-1.407	0.266	-0.054	-2.469
0.866	0.567	-0.728	0.272	-0.277	1.208	-1.168	-0.297	-0.463	0.361	0.592	-1.211	1.275	0.47	-0.165	0.882	-0.011	1.058	-0.388	-0.503	1.231	-1.297	-0.545	0.186	-0.904	-0.02	-1.059	0.624	1.154	-2.133	2.264	0.827	-0.283	1.615	0.027	1.793	-0.483	-1.059	2.13	-2.346	-0.886	0.401	-1.602	-0.047	-1.949
0.873	0.174	-0.949	0.311	0.102	1.246	-1.182	-0.391	-0.345	0.363	0.04	-1.418	1.284	0.261	-0.393	0.939	0.291	0.99	-0.345	-0.116	1.362	-1.273	-0.418	0.35	-0.964	-0.331	-1.006	0.61	0.357	-2.417	2.325	0.546	-0.523	1.645	0.671	1.743	-0.692	-0.113	2.409	-2.249	-0.602	0.654	-1.644	-0.586	-1.75
1.126	0.178	-0.559	-0.395	0.814	0.952	-0.792	-0.944	-0.339	0.947	-0.393	-0.898	1.185	0.733	-0.138	0.257	1.109	0.884	-1.021	0.434	0.906	-1.268	-0.651	0.091	-0.245	-1.117	-0.718	1.552	-0.612	-1.782	2.134	1.175	-0.311	0.564	1.851	1.57	-1.664	0.801	1.674	-2.157	-1.308	0.124	-0.284	-2.021	-1.402
0.948	0.424	-0.672	-0.458	0.7	0.97	-0.567	-1.11	-0.344	0.858	-0.191	-1.03	0.926	0.984	-0.246	0.028	1.157	0.804	-0.911	0.167	1.012	-0.947	-0.986	0.231	-0.137	-1.098	-0.881	1.627	-0.286	-1.776	1.601	1.781	-0.393	0.166	2.01	1.468	-1.485	0.299	1.957	-1.659	-1.859	0.338	-0.067	-1.979	-1.483
1.247	0.17	0.213	-0.884	0.283	0.897	-0.402	-0.409	-1.145	1.345	-0.064	-0.432	1.009	0.387	0.831	-0.317	0.485	1.279	-1.361	0.046	0.409	-1.033	-0.36	-0.847	0.267	-0.389	-1.32	2.354	-0.136	-0.813	1.813	0.674	1.567	-0.49	0.933	2.234	-2.348	0.05	0.824	-1.809	-0.761	-1.429	0.572	-0.864	-2.304
1.187	0.31	0.364	-0.895	-0.1	0.89	-0.282	-0.126	-1.26	1.32	0.309	-0.341	0.918	0.284	1.036	-0.37	0.002	1.366	-1.319	-0.173	0.306	-0.928	-0.254	-0.999	0.401	0.031	-1.382	2.333	0.447	-0.724	1.654	0.477	1.825	-0.752	-0.017	2.402	-2.244	-0.526	0.676	-1.653	-0.597	-1.746	0.64	0.017	-2.42
1.173	0.025	-0.618	-0.306	0.907	0.881	-0.879	-0.84	-0.353	0.909	-0.509	-0.991	1.311	0.571	-0.193	0.36	1.13	0.796	-0.94	0.598	0.845	-1.291	-0.529	0.134	-0.377	-1.044	-0.804	1.535	-1.029	-1.685	2.315	0.94	-0.178	0.653	1.758	1.573	-1.636	1.064	1.622	-2.242	-0.985	0.211	-0.598	-1.964	-1.33
1.134	0.463	-0.395	-0.693	0.626	0.904	-0.507	-1.026	-0.566	1.103	-0.057	-0.856	1.028	0.947	0.1	-0.14	1.091	0.93	-1.181	0.091	0.773	-1.038	-0.95	-0.115	0.07	-0.971	-0.969	1.969	-0.18	-1.493	1.935	1.544	0.287	-0.1	1.947	1.619	-2.076	0.127	1.424	-1.797	-1.718	-0.06	0.226	-1.871	-1.64
0.972	0.357	-0.659	-0.627	0.841	0.78	-0.387	-1.22	-0.076	0.981	-0.296	-0.891	0.847	0.97	-0.344	-0.163	1.299	0.545	-1.034	0.291	0.944	-0.87	-1.005	0.389	0.139	-1.309	-0.536	1.778	-0.469	-1.607	1.532	1.659	-0.692	-0.089	2.295	0.913	-1.842	0.497	1.495	-1.618	-1.675	0.657	0.338	-2.256	-0.874
0.447	1.187	-0.037	-1.209	-0.256	0.351	0.742	-0.964	-0.383	1.065	0.888	-0.199	-0.219	1.34	0.121	-1.217	0.45	0.423	-1.062	-0.94	0.231	0.178	-1.367	-0.224	1.208	-0.452	-0.516	1.835	1.641	-0.258	-0.356	2.448	0.228	-2.174	0.818	0.722	-1.885	-1.605	0.55	0.386	-2.42	-0.331	2.24	-0.801	-0.747
0.635	1.028	0.425	-1.29	0.005	0.003	0.663	-1.071	-0.393	1.216	0.618	0.285	-0.013	1.321	0.519	-1.21	0.659	0.276	-1.22	-0.653	-0.263	0.028	-1.34	-0.497	1.218	-0.696	-0.237	2.087	1.132	0.573	-0.033	2.304	0.823	-2.16	1.215	0.411	-2.185	-1.148	-0.492	0.074	-2.295	-1.022	2.199	-1.116	-0.376
0.837	0.878	0.381	-1.274	0.26	0.083	0.385	-1.117	-0.524	1.325	0.375	0.154	0.242	1.274	0.573	-1.037	0.885	0.33	-1.37	-0.381	-0.189	-0.314	-1.214	-0.618	1.032	-0.888	-0.392	2.339	0.733	0.285	0.608	2.296	0.908	-1.851	1.431	0.719	-2.37	-0.722	-0.261	-0.51	-2.261	-0.885	1.907	-1.528	-0.624
-0.366	0.864	0.887	-0.8	-0.895	-0.431	1.187	-0.026	-0.479	0.282	1.107	0.828	-0.98	0.523	0.832	-1.241	-0.568	-0.001	-0.257	-1.134	-0.81	0.999	-0.602	-0.847	1.245	0.537	-0.057	0.494	1.911	1.542	-1.641	0.983	1.583	-2.272	-0.945	0.003	-0.537	-1.908	-1.47	1.734	-0.958	-1.492	2.174	1.053	-0.111
-0.915	0.289	0.799	-0.249	-0.811	-0.95	1.147	0.522	0.156	-0.424	0.635	1.135	-1.307	-0.092	0.368	-0.896	-0.834	-0.72	0.419	-0.698	-1.068	1.328	0.135	-0.368	0.841	0.856	0.666	-0.72	1.129	2.018	-2.282	-0.114	0.705	-1.483	-1.578	-1.225	0.748	-1.111	-2.002	2.363	0.141	-0.694	1.413	1.532	1.186
-1.147	0.381	0.43	0.094	-0.545	-1.184	1.064	0.207	0.67	-0.789	0.545	1.034	-1.373	0.179	-0.234	-0.605	-0.428	-1.212	0.786	-0.581	-1.045	1.428	-0.067	0.117	0.58	0.453	1.139	-1.447	0.888	1.867	-2.418	0.319	-0.305	-1.157	-0.899	-1.968	1.434	-1.151	-1.724	2.487	-0.06	0.236	1.074	0.803	2.094
-1.262	0.038	0.285	0.364	-0.36	-1.187	0.89	0.445	0.856	-1.014	0.286	0.898	-1.363	-0.189	-0.375	-0.322	-0.458	-1.314	0.998	-0.211	-0.925	1.344	0.306	0.359	0.338	0.556	1.248	-1.835	0.38	1.666	-2.43	-0.545	-0.523	-0.462	-0.91	-2.357	1.811	-0.436	-1.633	2.401	0.322	0.659	0.535	0.899	2.299
-1.137	-0.411	0.475	0.269	-0.129	-1.233	0.86	0.558	0.757	-0.874	-0.179	1.094	-1.279	-0.604	-0.192	-0.391	-0.43	-1.256	0.898	0.192	-1.078	1.278	0.592	0.209	0.349	0.47	1.22	-1.539	-0.214	1.923	-2.183	-1.082	-0.415	-0.728	-0.791	-2.226	1.651	0.29	-1.811	2.259	1.027	0.335	0.56	0.728	2.197
-0.463	0.788	0.874	-0.809	-0.445	-0.939	1.221	-0.382	0.073	0.192	0.809	1.1	-1.076	0.661	0.559	-1.303	-0.046	-0.609	-0.234	-0.806	-1.167	1.038	-0.741	-0.486	1.264	0.032	0.621	0.455	1.495	1.904	-1.872	1.35	0.905	-2.286	-0.027	-0.997	-0.284	-1.327	-2.105	1.86	-1.425	-0.804	2.246	0.024	1.08
0.523	1.072	0.55	-1.033	0.131	-0.738	0.49	-1.157	0.226	0.992	0.596	0.815	-0.011	1.438	0.225	-0.953	0.808	-0.62	-0.993	-0.555	-0.761	-0.056	-1.389	-0.167	0.974	-0.79	0.6	1.777	0.985	1.396	0.041	2.456	0.431	-1.763	1.28	-1.227	-1.731	-0.905	-1.368	0.011	-2.46	-0.412	1.712	-1.464	1.09
0.387	0.693	1.015	-1.201	0.062	-0.439	0.83	-0.689	-0.641	1.04	0.462	0.865	-0.306	0.861	1.037	-1.286	0.537	0.076	-0.972	-0.403	-0.933	0.267	-0.902	-1.032	1.293	-0.399	-0.167	1.75	0.7	1.631	-0.503	1.434	1.906	-2.281	0.844	0.373	-1.848	-0.842	-1.495	0.586	-1.538	-1.845	2.26	-0.754	-0.417
0.116	0.836	0.923	-1.152	-0.329	-0.441	1.063	-0.506	-0.559	0.808	0.789	0.801	-0.57	0.793	0.924	-1.381	0.128	0.044	-0.797	-0.753	-0.878	0.58	-0.852	-0.955	1.426	-0.103	-0.121	1.224	1.422	1.512	-1.046	1.326	1.767	-2.457	0.24	0.103	-1.353	-1.292	-1.573	1.092	-1.571	-1.558	2.475	-0.127	-0.067
-0.495	0.208	1.205	-0.745	-0.068	-1.018	1.245	-0.214	-0.159	0.171	0.142	1.423	-1.106	0.23	0.861	-1.256	-0.018	-0.554	-0.147	-0.125	-1.362	1.078	-0.256	-0.855	1.273	-0.148	0.553	0.321	0.438	2.45	-1.951	0.503	1.452	-2.233	0.078	-1.021	-0.294	-0.132	-2.444	1.906	-0.518	-1.48	2.238	-0.193	0.977
-0.847	0.463	0.889	-0.113	0.349	-1.221	0.984	-0.788	0.344	-0.465	0.039	1.306	-1.131	0.852	0.373	-0.668	0.713	-0.995	0.462	-0.054	-1.305	1.131	-0.746	-0.353	0.728	-0.746	1.002	-0.816	0.029	2.33	-2.048	1.313	0.619	-1.218	1.251	-1.797	0.766	-0.079	-2.331	2.091	-1.228	-0.594	1.169	-1.344	1.745
-0.882	0.306	0.845	0.139	-1.223	-0.413	0.728	0.915	-0.471	-0.653	0.976	0.753	-1.012	-0.389	0.835	-0.42	-1.334	-0.018	0.682	-0.975	-0.757	1.021	0.362	-0.811	0.347	1.357	-0.092	-1.139	1.692	1.416	-1.794	-0.776	1.482	-0.69	-2.391	-0.059	1.162	-1.687	-1.364	1.894	0.713	-1.339	0.603	2.453	-0.044
-0.636	-0.975	0.492	0.922	-0.219	-0.894	-0.263	1.216	0.363	-0.948	-0.491	0.873	-0.245	-1.349	0.054	0.753	-0.896	-0.788	0.997	0.489	-0.904	0.24	1.381	-0.144	-0.742	0.919	0.817	-1.747	-0.835	1.499	-0.46	-2.414	0.152	1.266	-1.63	-1.346	1.698	0.82	-1.565	0.381	2.403	-0.171	-1.195	1.603	1.524
-0.278	-1.115	0.575	0.825	0.044	-0.981	-0.587	1.052	0.366	-0.731	-0.771	0.934	0.195	-1.339	0.137	0.878	-0.619	-0.842	0.67	0.7	-1.003	-0.182	1.368	-0.141	-0.925	0.615	0.82	-1.36	-1.312	1.691	0.57	-2.336	0.4	1.616	-1.054	-1.557	1.243	1.218	-1.803	-0.41	2.439	-0.139	-1.565	1.091	1.503
0.148	-1.139	0.573	0.877	0.379	-0.819	-1.012	0.73	0.278	-0.454	-0.965	0.885	0.739	-1.189	0.203	1.165	-0.248	-0.679	0.488	0.957	-0.864	-0.752	1.135	-0.212	-1.154	0.239	0.744	-0.883	-1.673	1.636	1.321	-2.077	0.207	2.112	-0.337	-1.227	0.845	1.669	-1.545	-1.358	2.035	-0.355	-2.069	0.454	1.209
-0.724	-0.943	0.611	0.446	-0.153	-1.188	0.258	1.083	0.653	-0.782	-0.47	1.154	-0.602	-1.312	0.01	0.057	-0.748	-1.166	0.788	0.456	-1.068	0.647	1.207	0.083	-0.158	0.837	1.165	-1.211	-0.784	2.032	-1.006	-2.342	-0.131	0.128	-1.271	-2.057	1.313	0.799	-2.014	1.094	2.184	-0.049	-0.27	1.444	2.041
-0.592	-0.949	-0.678	1.157	0.429	-0.408	-0.593	0.517	1.013	-1.129	-0.812	-0.24	0.012	-0.972	-1.054	1.11	-0.061	-0.908	1.077	0.869	0.128	-0.054	0.917	0.987	-1.079	0.052	0.914	-1.92	-1.537	-0.306	-0.053	-1.707	-1.784	1.988	-0.138	-1.557	1.853	1.58	0.302	0.031	1.592	1.858	-1.836	0.217	1.66
-0.389	-0.779	-0.986	0.3	1.229	-0.218	0.043	-0.417	1.175	-0.408	-1.271	-0.515	-0.33	-0.195	-1.358	0.178	1.044	-0.899	0.373	1.281	0.486	0.173	0.261	1.356	-0.098	-1.041	0.86	-0.67	-2.275	-0.778	-0.593	-0.383	-2.378	0.493	1.796	-1.6	0.675	2.261	0.898	0.398	0.452	2.42	-0.191	-1.928	1.508
0.189	-1.19	-0.477	0.178	1.01	-0.751	-0.349	0.168	1.235	-0.012	-1.399	0.165	0.367	-0.854	-1.062	0.317	0.536	-1.254	0.029	1.36	-0.168	-0.293	0.869	1.084	-0.364	-0.541	1.253	-0.064	-2.473	0.273	0.706	-1.415	-1.905	0.558	1.063	-2.149	-0.064	2.426	-0.293	-0.493	1.468	1.957	-0.686	-1.04	2.1
-0.383	-0.854	-0.858	-0.262	1.227	-0.185	0.74	-0.307	1.027	-0.002	-1.282	-0.487	-0.704	-0.326	-1.153	-0.635	0.985	-0.732	0.146	1.339	0.39	0.705	0.368	1.202	0.713	-0.927	0.739	-0.12	-2.315	-0.679	-1.376	-0.58	-1.955	-1.179	1.64	-1.427	0.245	2.369	0.71	1.004	0.538	2.254	1.203	-1.81	1.137
-0.058	-0.889	-0.906	0.185	1.253	-0.297	-0.012	-0.349	1.25	-0.162	-1.321	-0.396	0.08	-0.355	-1.308	0.161	0.996	-0.955	0.193	1.373	0.408	0.093	0.331	1.385	-0.094	-0.988	0.975	-0.356	-2.336	-0.764	-0.157	-0.659	-2.34	0.195	1.69	-1.738	0.354	2.449	0.581	0.021	0.576	2.463	-0.329	-1.756	1.689
0.383	-1.214	-0.028	0.526	0.868	-0.804	-0.94	0.365	0.791	-0.076	-1.303	0.503	0.799	-0.99	-0.555	0.865	0.315	-1.059	0.119	1.331	-0.468	-0.846	1.022	0.483	-0.933	-0.33	0.999	-0.106	-2.244	0.978	1.397	-1.776	-1.087	1.673	0.457	-1.733	0.195	2.337	-0.838	-1.405	1.807	0.976	-1.681	-0.626	1.8
0.266	-1.133	-0.515	0.864	0.918	-0.126	-1.122	0.184	0.612	-0.362	-1.309	-0.261	0.869	-0.823	-0.716	1.239	0.474	-0.511	0.393	1.245	0.277	-0.84	0.79	0.744	-1.279	-0.45	0.397	-0.695	-2.38	-0.325	1.52	-1.466	-1.328	2.163	0.951	-0.941	0.713	2.262	0.468	-1.498	1.446	1.327	-2.222	-0.739	0.868
0.522	-0.32	-1.144	0.737	0.456	1.001	-1.258	-0.129	0.161	-0.157	-0.437	-1.384	1.138	-0.161	-0.777	1.248	0.327	0.522	0.143	0.541	1.367	-1.111	0.126	0.833	-1.257	-0.379	-0.518	-0.266	-0.794	-2.462	2.056	-0.344	-1.337	2.211	0.441	0.993	0.265	0.986	2.342	-2.003	0.299	1.366	-2.265	-0.604	-0.945
0.625	-0.984	-0.61	0.553	0.545	1.008	-1.183	0.361	-0.331	0.03	-1.012	-0.963	1.151	-0.867	-0.165	1.107	0.071	0.861	-0.064	0.948	1.045	-1.141	0.81	0.204	-1.094	-0.136	-0.822	0.056	-1.684	-1.762	2.023	-1.362	-0.553	1.967	0.304	1.44	-0.121	1.644	1.885	-1.966	1.529	0.354	-1.947	-0.246	-1.523
0.201	-1.152	-0.477	0.256	0.232	1.268	-0.437	0.93	-0.728	-0.027	-0.853	-1.067	0.416	-1.318	0.183	0.439	-0.454	1.266	0.04	0.889	1.134	-0.422	1.274	-0.139	-0.398	0.488	-1.227	-0.182	-1.505	-1.909	0.741	-2.38	0.133	0.79	-0.805	2.215	0.113	1.616	1.952	-0.686	2.303	-0.315	-0.824	0.746	-2.224
0.048	-1.24	-0.217	0.292	0.487	1.157	-0.299	0.814	-0.96	-0.131	-1.068	-0.878	0.22	-1.265	0.459	0.377	-0.198	1.306	0.205	1.126	0.876	-0.241	1.324	-0.457	-0.33	0.224	-1.355	-0.109	-1.919	-1.515	0.308	-2.298	0.904	0.444	-0.42	2.323	0.17	1.927	1.559	-0.372	2.338	-0.817	-0.539	0.229	-2.406
-1.219	-0.148	-0.316	0.63	-0.991	0.54	0.594	1.16	-0.143	-1.128	0.534	-0.541	-1.176	-0.807	-0.033	0.023	-1.344	0.463	1.167	-0.52	0.568	1.167	0.805	0.133	-0.042	1.383	-0.397	-2.071	0.866	-1.012	-1.973	-1.443	-0.301	-0.005	-2.407	0.752	2.102	-0.968	0.898	2.029	1.455	0.194	-0.093	2.446	-0.724
-0.525	-0.46	-1.102	0.643	-0.768	0.818	-0.213	1.232	0.341	-0.765	0.188	-1.182	-0.247	-1.047	-0.89	0.469	-1.22	0.308	0.729	-0.231	1.251	0.187	1.059	0.929	-0.599	1.261	-0.281	-1.212	0.249	-2.129	-0.298	-1.882	-1.635	1.02	-2.191	0.4	1.309	-0.36	2.143	0.341	1.926	1.577	-0.934	2.249	-0.489
0.214	-0.336	-1.193	-0.83	-0.678	0.735	0.599	1.04	0.483	0.625	0.234	-1.192	-0.224	-0.871	-1.063	-0.856	-1.066	0.181	-0.718	-0.202	1.219	0.231	0.882	1.045	0.902	1.083	-0.131	1.231	0.424	-2.122	-0.479	-1.512	-1.808	-1.472	-1.991	0.218	-1.214	-0.419	2.086	0.436	1.511	1.876	1.538	1.927	-0.307
0.492	0.51	-1.074	-1.247	-0.326	0.077	0.727	-0.145	1.025	1.076	0.55	-0.712	-0.157	0.419	-1.314	-1.26	-0.105	-0.601	-1.093	-0.501	0.757	0.158	-0.389	1.361	1.209	0.12	0.577	1.947	0.911	-1.198	-0.188	0.716	-2.387	-2.181	-0.213	-1.072	-1.994	-0.966	1.206	0.259	-0.768	2.425	2.225	0.228	0.959
0.999	-0.205	-0.814	-0.733	1.073	-0.071	-0.29	-0.893	0.843	1.049	-0.878	-0.526	0.83	0.48	-1.017	-0.293	1.27	-0.618	-1.092	0.76	0.483	-0.768	-0.421	1.032	0.218	-1.268	0.547	1.827	-1.425	-1.019	1.585	0.884	-1.621	-0.574	2.188	-1.12	-1.845	1.341	0.9	-1.303	-0.709	1.861	0.366	-2.223	1.097
-0.135	-0.28	-1.283	0.177	1.205	0.424	-0.075	-0.966	0.845	-0.188	-0.973	-1.078	-0.078	0.436	-1.35	0.122	1.346	-0.251	0.205	0.921	1.051	0.029	-0.441	1.307	-0.168	-1.385	0.289	-0.153	-1.648	-1.858	-0.157	0.823	-2.336	0.356	2.437	-0.434	0.323	1.673	1.86	-0.067	-0.774	2.314	-0.224	-2.414	0.488
0.464	-1.166	0.181	0.631	0.855	-0.702	-1.176	0.286	0.484	-0.115	-1.27	0.564	0.975	-0.93	-0.215	1.12	0.372	-0.739	0.06	1.232	-0.606	-1.104	0.867	0.113	-1.129	-0.332	0.796	-0.099	-2.313	0.944	1.826	-1.592	-0.437	1.992	0.699	-1.239	0.251	2.268	-0.859	-1.835	1.627	0.294	-1.942	-0.63	1.384
0.034	-1.242	0.28	0.863	0.492	-0.797	-1.019	0.751	0.392	-0.587	-1.12	0.602	0.631	-1.229	-0.097	1.144	-0.167	-0.84	0.465	1.102	-0.685	-0.714	1.274	0.049	-1.23	0.142	0.675	-0.783	-1.863	1.313	1.121	-2.232	-0.105	2.139	-0.373	-1.283	0.977	1.937	-1.119	-1.091	2.31	0.107	-2.074	0.218	1.382
0.096	-1.142	0.615	0.784	0.316	-1.001	-0.989	0.755	0.298	-0.466	-0.94	0.968	0.633	-1.224	0.183	1.065	-0.314	-0.844	0.393	0.903	-1.056	-0.675	1.16	-0.183	-1.21	0.249	0.722	-0.73	-1.628	1.729	1.215	-2.066	0.435	1.975	-0.358	-1.388	0.889	1.505	-1.833	-1.096	2.157	-0.153	-1.993	0.557	1.421
-0.244	-1.23	0.204	0.948	0.32	-0.744	-0.776	0.898	0.5	-0.773	-0.979	0.568	0.303	-1.342	-0.197	1.071	-0.381	-0.741	0.711	0.986	-0.664	-0.323	1.333	0.176	-1.159	0.357	0.763	-1.303	-1.698	1.201	0.601	-2.419	-0.364	1.964	-0.668	-1.291	1.302	1.732	-1.17	-0.538	2.359	0.263	-1.857	0.72	1.456
-0.642	-1.121	-0.275	1.149	0.28	-0.597	-0.485	0.764	0.865	-1.103	-0.891	0.198	-0.104	-1.24	-0.713	1.01	-0.366	-0.897	1.165	0.882	-0.23	0.084	1.148	0.735	-1	0.284	0.889	-1.987	-1.549	0.412	-0.216	-2.019	-1.386	1.769	-0.475	-1.64	1.994	1.555	-0.36	0.071	2.104	1.242	-1.683	0.568	1.749
-1.27	0.086	-0.311	0.848	0.586	-0.77	0.361	-0.623	1.107	-1.33	-0.319	0.272	-1.073	0.498	-0.86	0.249	0.805	-1.15	1.338	0.321	-0.297	1.006	-0.431	0.894	-0.337	-0.757	1.201	-2.315	-0.66	0.567	-1.865	0.762	-1.596	0.596	1.266	-2.076	2.395	0.438	-0.581	1.859	-0.595	1.48	-0.524	-1.326	2.147
-1.172	-0.468	-0.094	0.501	0.692	-0.938	0.677	-0.2	1.064	-1.027	-0.709	0.552	-1.173	-0.177	-0.731	-0.134	0.577	-1.222	1.071	0.734	-0.539	1.166	0.191	0.715	0.113	-0.558	1.3	-1.885	-1.255	0.971	-2.174	-0.277	-1.271	-0.138	0.915	-2.229	1.927	1.344	-1.025	2.105	0.223	1.254	0.151	-1.008	2.225
-0.671	-1.096	0.077	1.087	0.023	-0.679	-0.392	1.079	0.623	-1.113	-0.709	0.445	-0.157	-1.367	-0.304	0.961	-0.665	-0.796	1.097	0.714	-0.477	0.195	1.387	0.386	-0.924	0.653	0.797	-1.984	-1.131	0.882	-0.202	-2.453	-0.573	1.652	-1.161	-1.422	1.907	1.165	-0.94	0.294	2.401	0.548	-1.725	1.167	1.454
-0.726	-1.032	-0.222	1.281	-0.112	-0.048	-0.531	1.126	0.313	-1.237	-0.609	-0.059	-0.13	-1.345	-0.335	1.13	-0.755	-0.253	1.286	0.535	0.176	0.144	1.36	0.351	-1.136	0.771	0.225	-2.211	-1.043	-0.291	-0.245	-2.325	-0.733	2.036	-1.171	-0.705	2.274	0.888	0.388	0.151	2.401	0.676	-2.062	1.294	0.56
-0.612	-1.079	-0.073	1.276	0.013	0.078	-0.659	1.117	0.068	-1.168	-0.653	-0.114	0.022	-1.372	-0.012	1.203	-0.685	0.086	1.202	0.715	0.083	0.001	1.401	0.063	-1.247	0.714	0.069	-2.094	-1.22	-0.248	-0.047	-2.513	-0.127	2.108	-1.242	-0.01	2.198	1.211	0.028	-0.012	2.471	0.24	-2.167	1.174	-0.057
-1.237	0.026	-0.397	0.481	-1.061	0.538	0.74	1.024	-0.055	-1.058	0.666	-0.585	-1.28	-0.62	-0.158	-0.177	-1.323	0.38	1.084	-0.681	0.66	1.229	0.615	0.26	0.165	1.319	-0.352	-1.922	1.228	-0.977	-2.171	-1.094	-0.415	-0.313	-2.349	0.516	1.93	-1.178	1.005	2.265	1.054	0.44	0.247	2.365	-0.773
-1.026	-0.781	0.206	1.105	-0.211	0.609	-0.115	1.044	-0.762	-1.338	-0.327	-0.228	-0.603	-1.141	0.634	0.782	-0.776	0.856	1.304	0.388	0.284	0.544	1.185	-0.596	-0.775	0.793	-0.825	-2.354	-0.624	-0.527	-1.027	-2.051	1.015	1.29	-1.345	1.609	2.405	0.51	0.529	1.032	2.001	-1.163	-1.26	1.386	-1.588
-0.93	0.7	-0.591	-0.266	-0.72	1.038	1.187	0.045	-0.484	-0.41	0.914	-1.049	-1.348	0.413	-0.075	-0.914	-0.466	0.966	0.418	-0.893	0.998	1.325	-0.392	0.042	0.909	0.484	-0.969	-0.763	1.566	-1.787	-2.317	0.701	-0.089	-1.666	-0.844	1.642	0.722	-1.54	1.774	2.338	-0.764	0.158	1.706	0.823	-1.611
-0.978	-0.369	-0.734	-0.038	-0.18	1.251	1.036	0.614	-0.535	-0.598	-0.025	-1.253	-1.243	-0.661	-0.137	-0.671	-0.525	1.141	0.6	0.186	1.216	1.311	0.611	0.11	0.648	0.567	-1.121	-1.057	-0.21	-2.24	-2.274	-1.163	-0.15	-1.138	-0.974	2.004	0.996	0.376	2.21	2.308	0.975	0.224	1.118	0.843	-2.005
-0.105	-0.601	-1.127	-0.34	-0.588	1.068	0.471	1.178	0.028	0.201	-0.064	-1.391	-0.384	-1.078	-0.734	-0.47	-1.158	0.658	-0.163	0.046	1.345	0.277	1.155	0.705	0.602	1.074	-0.657	0.326	-0.14	-2.481	-0.858	-1.774	-1.298	-0.973	-1.91	1.255	-0.256	-0.014	2.457	0.537	1.999	1.265	1.163	1.863	-1.123
0.713	0.259	-1.006	-0.764	-1.046	-0.012	-0.037	0.809	0.98	0.942	0.794	-0.657	0.391	-0.289	-1.252	-0.515	-1.136	-0.681	-0.945	-0.837	0.652	-0.505	0.358	1.259	0.426	1.163	0.59	1.801	1.333	-1.006	0.752	-0.649	-2.222	-0.773	-2.05	-1.172	-1.55	-1.46	1.203	-0.946	0.773	2.173	0.924	2.001	1.112
0.289	1.166	-0.464	0.066	-1.027	-0.812	-0.51	-0.117	1.227	0.071	1.362	0.169	0.45	0.842	-1.065	0.273	-0.569	-1.298	-0.187	-1.364	-0.238	-0.52	-0.828	1.068	-0.453	0.609	1.248	0.225	2.431	0.436	1.044	1.428	-1.735	0.772	-0.987	-2.196	-0.093	-2.506	-0.477	-0.779	-1.467	1.932	-0.802	1.048	2.155
0.212	1.256	-0.167	-0.139	-0.802	-1.001	-0.11	-0.451	1.164	0.155	1.299	0.536	0.242	1.069	-0.852	-0.018	-0.233	-1.372	-0.239	-1.285	-0.519	-0.196	-1.084	0.823	-0.033	0.241	1.376	0.37	2.24	0.921	0.386	1.969	-1.477	-0.074	-0.36	-2.425	-0.459	-2.263	-0.887	-0.332	-1.911	1.433	0.198	0.317	2.442
-0.347	1.208	-0.147	-0.206	-0.815	-0.995	0.626	-0.379	1.089	0.013	1.28	0.478	-0.649	1.001	-0.767	-0.528	-0.254	-1.325	0.147	-1.281	-0.557	0.676	-1.007	0.768	0.515	0.293	1.278	-0.198	2.243	0.921	-1.187	1.767	-1.277	-0.947	-0.47	-2.274	0.17	-2.283	-1.005	1.082	-1.757	1.409	0.905	0.469	2.35
-0.612	0.248	-1.097	0.026	-1.195	0.489	0.571	0.953	0.624	-0.418	0.901	-0.988	-0.739	-0.435	-1.084	-0.33	-1.355	-0.091	0.376	-0.896	1.023	0.703	0.439	1.11	0.371	1.361	0.066	-0.718	1.685	-1.738	-1.312	-0.84	-1.914	-0.593	-2.419	-0.263	0.701	-1.621	1.782	1.266	0.755	2.014	0.69	2.426	0.083
-0.785	0.75	-0.702	-0.279	-1.248	0.214	1.075	0.442	0.406	-0.322	1.255	-0.558	-1.155	0.163	-0.779	-0.892	-1.115	-0.102	0.36	-1.254	0.493	1.177	-0.22	0.614	0.857	1.039	0.136	-0.594	2.244	-0.984	-2.075	0.25	-1.222	-1.575	-1.893	-0.192	0.706	-2.111	1.056	2.08	-0.229	1.232	1.433	1.871	0.307
-1.068	-0.194	-0.702	0.779	-0.981	0.185	0.293	1.184	0.488	-1.157	0.478	-0.553	-0.857	-0.852	-0.774	0.313	-1.374	-0.179	1.158	-0.467	0.522	0.812	0.869	0.785	-0.26	1.368	0.13	-2.051	0.874	-0.978	-1.535	-1.424	-1.342	0.524	-2.467	-0.228	2.077	-0.931	0.91	1.486	1.511	1.347	-0.509	2.415	0.362
-1.239	-0.045	0.381	0.927	-0.755	0.551	0.313	0.77	-0.974	-1.351	0.482	-0.089	-0.993	-0.567	0.798	0.356	-1.011	0.917	1.396	-0.411	0.118	0.957	0.521	-0.828	-0.364	0.915	-1.015	-2.371	0.856	-0.127	-1.702	-1.008	1.527	0.68	-1.813	1.609	2.373	-0.744	0.301	1.577	0.983	-1.563	-0.559	1.798	-1.647
-0.976	-0.844	-0.057	0.96	-0.2	0.813	-0.04	1.062	-0.722	-1.229	-0.39	-0.545	-0.61	-1.205	0.431	0.642	-0.824	0.983	1.161	0.443	0.557	0.542	1.21	-0.381	-0.639	0.811	-0.963	-2.184	-0.747	-0.92	-1.117	-2.038	0.817	1.264	-1.46	1.595	2.059	0.833	1.051	1.132	2.04	-0.822	-1.023	1.327	-1.804
-0.632	-1.086	-0.21	0.986	0.01	0.791	-0.407	1.097	-0.545	-1.032	-0.71	-0.645	-0.159	-1.349	0.243	0.88	-0.658	0.825	0.97	0.685	0.681	0.122	1.399	-0.181	-0.91	0.684	-0.839	-1.901	-1.11	-1.043	-0.244	-2.4	0.409	1.569	-1.269	1.395	1.837	1.202	1.089	0.366	2.379	-0.31	-1.498	1.148	-1.625
-0.556	-0.897	-0.697	0.336	-0.222	1.218	0.143	1.198	-0.501	-0.625	-0.395	-1.168	-0.439	-1.284	-0.142	0.115	-0.86	1.056	0.506	0.455	1.239	0.441	1.355	0.136	-0.178	0.916	-1.075	-1.072	-0.791	-2.051	-0.611	-2.373	-0.347	0.365	-1.502	1.88	0.93	0.602	2.227	0.878	2.396	0.262	-0.31	1.48	-2.016
-0.335	-1.203	-0.236	0.202	0.377	1.17	0.193	0.812	-1.002	-0.268	-1.013	-0.886	-0.361	-1.26	0.434	0	-0.287	1.313	0.392	0.996	0.882	0.344	1.288	-0.491	0.037	0.241	-1.414	-0.563	-1.765	-1.61	-0.588	-2.219	0.896	-0.045	-0.485	2.438	0.597	1.772	1.64	0.583	2.324	-0.759	-0.128	0.408	-2.443
0.11	-1.148	-0.518	-0.702	0.118	1.075	0.506	1.051	-0.564	0.45	-0.775	-1.008	-0.248	-1.391	0.028	-0.823	-0.585	1.001	-0.521	0.816	1.018	0.235	1.367	0.023	0.705	0.615	-1.078	0.815	-1.408	-1.822	-0.364	-2.455	0.115	-1.278	-1.112	1.818	-0.832	1.395	1.895	0.585	2.397	-0.084	1.277	1.136	-1.907
0.735	-1.007	0.247	-0.915	0.417	0.836	0.108	0.556	-1.139	0.999	-0.937	-0.396	0.377	-0.977	0.849	-0.601	-0.094	1.25	-1.132	0.883	0.322	-0.458	0.934	-0.899	0.644	0.11	-1.259	1.773	-1.587	-0.701	0.816	-1.619	1.692	-1.142	-0.236	2.22	-1.847	1.609	0.632	-0.643	1.754	-1.554	1.213	0.16	-2.156
0.025	-1.251	-0.202	0.551	0.501	1.086	-0.564	0.782	-0.849	-0.25	-1.06	-0.808	0.299	-1.292	0.44	0.703	-0.165	1.243	0.323	1.119	0.814	-0.387	1.285	-0.389	-0.66	0.19	-1.217	-0.447	-1.949	-1.468	0.502	-2.327	0.627	1.341	-0.423	2.145	0.66	2.006	1.399	-0.804	2.21	-0.743	-1.281	0.407	-2.044
0.246	-1.179	-0.465	0.904	0.574	0.698	-1.145	0.609	-0.215	-0.425	-1.061	-0.725	0.897	-1.163	-0.161	1.28	-0.046	0.614	0.427	1.124	0.706	-0.877	1.152	0.149	-1.289	0.005	-0.54	-0.732	-1.927	-1.235	1.459	-2.016	-0.214	2.231	0.006	1.085	0.786	1.988	1.223	-1.483	2.02	0.134	-2.274	-0.082	-1.035
-0.194	-0.625	-1.085	0.836	-0.455	0.888	-0.68	1.055	0.236	-0.705	-0.197	-1.195	0.331	-0.991	-0.845	0.946	-0.933	0.364	0.628	0.069	1.315	-0.296	1.052	0.828	-0.995	0.939	-0.373	-1.203	-0.318	-2.172	0.647	-1.678	-1.53	1.683	-1.634	0.674	1.151	0.171	2.271	-0.408	1.954	1.396	-1.778	1.566	-0.734
-0.653	-0.553	-0.936	1.189	-0.357	0.236	-0.539	1.014	0.622	-1.178	-0.142	-0.74	-0.053	-0.878	-1.046	1.073	-0.819	-0.278	1.176	0.16	0.707	0.108	1.041	0.912	-1.134	0.887	0.26	-2.111	-0.313	-1.146	-0.092	-1.805	-1.758	1.908	-1.525	-0.309	2.003	0.173	1.3	0.332	1.854	1.634	-2.033	1.367	0.463
-0.83	0.56	-0.837	0.641	-0.995	-0.373	0.147	0.471	1.195	-0.938	0.994	-0.335	-0.626	0.068	-1.251	0.227	-0.992	-0.943	0.974	-0.882	0.239	0.61	-0.022	1.282	-0.346	0.92	0.971	-1.723	1.763	-0.535	-1.088	0.046	-2.185	0.46	-1.784	-1.644	1.796	-1.576	0.383	1.25	-0.142	2.153	-0.597	1.608	1.864
-0.625	1.018	-0.558	0.738	-0.787	-0.68	-0.257	-0.267	1.219	-0.957	1.098	0.053	-0.252	0.815	-1.1	0.617	-0.374	-1.207	0.768	-1.117	-0.085	0.116	-0.855	1.103	-0.634	0.348	1.191	-1.441	2.07	0.083	-0.293	1.434	-2.019	1.22	-0.542	-2.101	1.336	-2.03	-0.07	0.528	-1.411	1.982	-1.008	0.562	2.169
-1.135	0.575	0.121	0.435	-0.346	-1.181	0.711	-0.263	1.074	-1.002	0.572	0.838	-1.15	0.498	-0.606	-0.126	-0.098	-1.395	0.966	-0.542	-0.833	1.159	-0.538	0.612	0.178	0.03	1.418	-1.672	1.211	1.38	-2.016	0.907	-1.026	-0.355	-0.18	-2.464	1.593	-1.132	-1.48	2.061	-0.882	1.1	0.365	0.154	2.457
-1.167	0.298	-0.489	0.982	-0.17	-0.77	0.186	-0.171	1.28	-1.39	0.301	0.168	-0.813	0.255	-1.092	0.521	-0.026	-1.266	1.331	-0.302	-0.182	0.855	-0.3	1.122	-0.501	-0.029	1.298	-2.444	0.49	0.324	-1.45	0.583	-1.957	0.875	-0.059	-2.291	2.431	-0.432	-0.347	1.525	-0.364	1.933	-0.94	-0.118	2.289
-1.074	0.652	0.194	0.351	-0.274	-1.222	0.789	-0.226	0.987	-0.886	0.645	0.882	-1.134	0.607	-0.52	-0.234	0.089	-1.409	0.905	-0.586	-0.908	1.2	-0.511	0.494	0.304	0.116	1.362	-1.574	1.181	1.612	-2.101	0.758	-0.919	-0.399	0.047	-2.459	1.471	-1.201	-1.508	1.965	-1.124	0.959	0.482	-0.02	2.413
-0.637	0.558	0.963	-0.445	0.115	-1.2	1.013	-0.725	0.223	-0.134	0.272	1.344	-1.08	0.784	0.469	-0.962	0.498	-0.901	0.113	-0.298	-1.364	1.01	-0.859	-0.471	0.891	-0.522	0.889	-0.131	0.409	2.363	-1.853	1.405	0.891	-1.542	0.993	-1.622	0.173	-0.41	-2.37	1.91	-1.417	-0.873	1.606	-0.857	1.645
0.219	0.305	1.216	-1.159	0.217	-0.538	0.906	-0.572	-0.654	0.816	-0.051	1.139	-0.404	0.626	1.154	-1.302	0.478	0.123	-0.891	-0.076	-1.128	0.451	-0.538	-1.17	1.252	-0.558	-0.06	1.441	-0.042	1.981	-0.682	1.061	2.105	-2.244	1.087	0.094	-1.553	-0.267	-1.997	0.779	-0.953	-2.083	2.337	-0.768	-0.157
-1.171	-0.313	0.403	0.389	-0.372	-1.151	0.771	0.707	0.76	-1.022	0.074	0.963	-1.187	-0.665	-0.194	-0.251	-0.644	-1.181	0.98	-0.054	-0.993	1.243	0.628	0.22	0.209	0.715	1.214	-1.844	0.077	1.729	-2.091	-1.117	-0.47	-0.43	-1.137	-2.105	1.786	-0.149	-1.717	2.193	1.113	0.372	0.412	1.158	2.162
-0.131	0.416	1.212	-0.001	-1.237	-0.227	0.188	0.855	-0.974	-0.003	1.065	0.925	-0.255	-0.266	1.362	-0.119	-1.284	0.472	0.136	-1.048	-0.897	0.248	0.285	-1.386	0.128	1.33	-0.451	0.02	1.832	1.644	-0.325	-0.604	2.417	-0.421	-2.271	0.765	0.206	-1.879	-1.572	0.247	0.456	-2.477	0.137	2.385	-0.802
-0.043	-0.499	1.186	0.334	-0.747	-0.986	-0.303	1.225	-0.17	-0.212	0.169	1.386	0.118	-1.109	0.851	0.362	-1.279	-0.533	0.271	-0.138	-1.321	-0.175	1.091	-0.833	-0.39	1.217	0.518	-0.339	0.216	2.483	0.356	-1.897	1.493	0.765	-2.168	-0.955	0.319	-0.234	-2.435	-0.384	1.922	-1.525	-0.691	2.209	0.87
-0.212	-0.666	1.089	0.754	-0.53	-0.896	-0.489	1.184	-0.18	-0.54	-0.062	1.281	0.155	-1.201	0.778	0.817	-1.096	-0.455	0.618	0.092	-1.224	-0.174	1.173	-0.791	-0.749	1.068	0.443	-1.106	-0.067	2.218	0.227	-2.081	1.381	1.286	-1.939	-0.893	1.095	0.227	-2.243	-0.289	2.025	-1.417	-1.339	1.862	0.921
-0.267	-0.979	0.771	0.99	-0.067	-0.866	-0.607	1.12	0.138	-0.749	-0.553	1.037	0.259	-1.289	0.422	1.018	-0.725	-0.596	0.873	0.619	-1.02	-0.171	1.373	-0.365	-0.954	0.75	0.625	-1.387	-1.037	1.764	0.343	-2.311	0.765	1.609	-1.446	-1.253	1.418	0.975	-1.849	-0.514	2.358	-0.669	-1.744	1.287	1.14
-0.598	-0.739	0.792	0.779	-0.542	-0.881	-0.165	1.278	0.063	-0.846	-0.118	0.98	-0.271	-1.279	0.51	0.622	-1.147	-0.564	0.838	0.117	-1.103	0.268	1.267	-0.492	-0.572	1.151	0.609	-1.529	-0.266	1.747	-0.593	-2.187	0.965	1.183	-1.941	-0.994	1.548	0.22	-1.896	0.484	2.266	-0.85	-1.131	1.917	1.089
0.004	-1.283	-0.134	0.577	0.756	-0.862	-0.507	0.549	1.054	-0.355	-1.249	0.454	0.384	-1.171	-0.692	0.682	0.114	-1.177	0.419	1.316	-0.438	-0.296	1.161	0.738	-0.66	-0.118	1.251	-0.74	-2.252	0.786	0.494	-2.049	-1.411	1.164	0.154	-2.168	0.623	2.337	-0.851	-0.602	2.002	1.335	-1.114	-0.244	2.174
-0.202	-1.256	-0.267	0.53	0.765	-0.892	-0.311	0.483	1.165	-0.387	-1.269	0.446	0.007	-1.097	-0.954	0.501	0.19	-1.301	0.497	1.259	-0.383	-0.084	1.085	0.892	-0.492	-0.185	1.314	-0.692	-2.251	0.754	0.006	-1.989	-1.59	1.002	0.305	-2.221	0.804	2.203	-0.756	-0.222	1.956	1.503	-0.94	-0.208	2.296
-0.289	-1.223	0.341	1.136	0.248	-0.532	-0.817	0.931	0.275	-0.885	-0.962	0.609	0.343	-1.34	0.052	1.263	-0.46	-0.465	0.898	0.918	-0.512	-0.306	1.357	0.046	-1.241	0.383	0.467	-1.522	-1.726	0.955	0.524	-2.427	-0.024	2.098	-0.745	-1.072	1.503	1.69	-1.032	-0.488	2.421	0.121	-2.187	0.891	0.856
-1.235	-0.266	0.232	0.898	-0.623	0.642	0.301	0.92	-0.845	-1.384	0.259	-0.24	-0.948	-0.749	0.682	0.369	-0.953	0.959	1.315	-0.228	0.263	0.964	0.762	-0.673	-0.399	0.983	-0.92	-2.456	0.366	-0.439	-1.648	-1.393	1.179	0.804	-1.695	1.638	2.335	-0.325	0.396	1.685	1.274	-1.25	-0.638	1.699	-1.595
-0.986	-0.52	0.631	1.126	0.122	0.605	-0.087	0.413	-1.226	-1.297	-0.409	0.034	-0.556	-0.571	1.165	0.815	-0.232	1.115	1.319	0.454	0.02	0.565	0.628	-1.171	-0.722	0.167	-1.138	-2.338	-0.719	-0.019	-1.064	-1.018	2.027	1.33	-0.308	2.015	2.319	0.816	0.09	1.014	0.915	-2.097	-1.387	0.278	-2.042
-0.855	0.088	0.925	1.226	0.123	0.271	-0.392	-0.228	-1.196	-1.312	-0.077	0.403	-0.295	0.246	1.344	1.02	0.223	0.903	1.283	0.007	-0.389	0.294	-0.209	-1.333	-1.038	-0.229	-0.928	-2.342	-0.083	0.687	-0.571	0.349	2.387	1.89	0.469	1.56	2.331	-0.016	-0.677	0.628	-0.397	-2.329	-1.887	-0.282	-1.628
-1.017	-0.723	-0.314	0.535	-0.107	1.19	0.46	0.835	-0.822	-0.962	-0.362	-0.929	-0.947	-1.016	0.346	0.064	-0.627	1.277	0.935	0.425	0.976	0.956	0.911	-0.346	-0.099	0.68	-1.196	-1.717	-0.601	-1.686	-1.805	-1.653	0.533	0.136	-0.981	2.26	1.772	0.63	1.621	1.833	1.515	-0.59	-0.166	1.079	-2.265
-0.877	-0.812	-0.486	0.577	-0.273	1.124	0.252	1.083	-0.66	-0.871	-0.361	-1.059	-0.789	-1.16	0.139	0.245	-0.893	1.082	0.84	0.369	1.042	0.651	1.214	-0.1	-0.191	0.828	-1.157	-1.591	-0.714	-1.799	-1.28	-2.13	0.21	0.469	-1.594	1.936	1.501	0.789	1.782	1.07	2.225	-0.058	-0.057	1.426	-2.018
-1.022	-0.532	-0.6	0.43	-0.501	1.103	0.633	0.968	-0.559	-0.855	-0.09	-1.153	-1.064	-0.929	0	-0.14	-0.908	1.03	0.966	-0.049	1.048	1.092	0.895	-0.009	0.098	0.927	-1.049	-1.664	0.027	-1.846	-1.853	-1.636	0.082	-0.409	-1.542	1.875	1.67	-0.002	1.864	1.883	1.607	-0.066	0.275	1.701	-1.777
-0.833	-0.359	-0.883	0.045	-0.634	1.124	0.82	0.957	-0.256	-0.526	0.13	-1.262	-1.023	-0.823	-0.404	-0.52	-1.008	0.89	0.607	-0.19	1.228	1.102	0.776	0.391	0.436	1.029	-0.879	-1.176	0.399	-2.138	-1.889	-1.41	-0.826	-0.923	-1.8	1.568	1.048	-0.307	2.226	1.952	1.373	0.679	0.912	1.83	-1.474
0.848	-0.809	-0.514	-0.93	-0.432	0.779	0.093	1.226	-0.238	1.132	-0.26	-0.808	0.469	-1.269	-0.168	-0.641	-1.075	0.656	-1.115	0.258	0.821	-0.48	1.295	0.199	0.66	1.012	-0.634	2.04	-0.442	-1.391	0.771	-2.247	-0.248	-1.152	-1.901	1.073	-1.942	0.462	1.456	-0.84	2.328	0.239	1.097	1.839	-1.195
0.315	-1.073	-0.63	-1.218	0.325	0.101	0.926	0.763	0.564	0.958	-0.917	-0.411	-0.363	-1.108	-0.78	-1.337	-0.248	-0.302	-0.951	0.869	0.495	0.388	1.13	0.77	1.358	0.308	0.308	1.676	-1.595	-0.698	-0.634	-2.004	-1.394	-2.4	-0.417	-0.54	-1.793	1.406	0.846	0.726	2.031	1.221	2.37	0.542	0.484
1.029	-0.297	0.73	-0.422	-0.862	-0.874	-0.618	1.088	0.151	0.878	0.315	1.042	1.067	-0.886	0.331	0.137	-1.249	-0.633	-0.943	-0.394	-1.008	-1.017	0.844	-0.359	-0.149	1.202	0.645	1.491	0.649	1.91	1.896	-1.51	0.603	0.329	-2.197	-1.156	-1.626	-0.501	-1.859	-1.742	1.569	-0.694	-0.322	2.159	1.178
-0.617	0.376	1.079	0.823	-1.008	0.037	-0.184	0.613	-1.102	-0.893	0.861	0.665	-0.268	-0.168	1.378	0.681	-1.014	0.702	0.872	-0.885	-0.629	0.32	0.145	-1.329	-0.66	1.015	-0.755	-1.59	1.572	1.092	-0.525	-0.137	2.421	1.214	-1.808	1.197	1.533	-1.595	-1.105	0.512	0.202	-2.396	-1.195	1.811	-1.241
-1.139	0.51	0.154	0.796	-0.161	1.039	0.395	-0.259	-1.169	-1.185	0.473	-0.524	-0.955	0.516	0.82	0.249	0.097	1.42	1.254	-0.397	0.548	1	-0.435	-0.812	-0.239	-0.041	-1.393	-2.128	0.679	-0.964	-1.787	0.698	1.423	0.431	0.176	2.505	2.219	-0.749	0.887	1.714	-0.853	-1.474	-0.573	-0.164	-2.435
-1.067	0.748	-0.005	0.262	-0.654	1.036	0.796	-0.076	-1.042	-0.847	0.885	-0.663	-1.17	0.527	0.65	-0.334	-0.356	1.287	0.823	-0.892	0.662	1.174	-0.523	-0.636	0.333	0.4	-1.327	-1.576	1.536	-1.095	-1.956	0.959	1.113	-0.518	-0.473	2.324	1.47	-1.562	1.22	2.008	-1.027	-1.133	0.592	0.527	-2.403
-0.071	0.64	-1.094	-0.721	0.373	1.028	0.726	-1.057	0.033	0.301	0.095	-1.367	-0.428	1.108	-0.704	-0.892	0.897	0.595	-0.488	-0.199	1.341	0.473	-1.086	0.694	0.88	-0.921	-0.638	0.499	0.17	-2.372	-0.809	2.029	-1.216	-1.443	1.649	1.097	-0.718	-0.343	2.386	0.919	-1.948	1.204	1.706	-1.451	-1.021
-0.494	0.469	-1.112	-0.463	0.423	1.151	0.879	-0.871	-0.074	-0.032	0.068	-1.426	-0.925	0.825	-0.672	-0.94	0.813	0.729	0.064	-0.005	1.435	0.815	-0.874	0.615	0.832	-0.778	-0.763	0.131	-0.022	-2.432	-1.495	1.495	-1.292	-1.58	1.36	1.45	0.052	-0.058	2.505	1.585	-1.391	1.143	1.494	-1.434	-1.293
0.862	0.947	-0.204	-1.225	0.199	-0.25	0.342	-1.112	0.536	1.291	0.463	0.033	0.326	1.337	-0.406	-1.003	0.837	-0.455	-1.313	-0.457	0	-0.313	-1.282	0.505	0.962	-0.815	0.517	2.362	0.714	0.03	0.618	2.308	-0.862	-1.765	1.481	-0.878	-2.274	-0.857	-0.16	-0.609	-2.274	0.768	1.717	-1.455	0.908
0.696	1.033	-0.315	-1.238	-0.07	-0.379	0.453	-0.915	0.747	1.174	0.706	0.063	0.121	1.254	-0.641	-1.077	0.526	-0.727	-1.263	-0.653	0.014	-0.193	-1.165	0.745	1.031	-0.556	0.673	2.223	1.127	-0.018	0.339	2.18	-1.225	-1.893	0.938	-1.31	-2.187	-1.227	0.015	-0.231	-2.06	1.282	1.956	-1.071	1.129
-0.652	1.016	0.489	-0.502	-0.66	-0.998	1.132	-0.365	0.49	-0.12	1.027	0.951	-1.122	0.886	-0.027	-1.024	-0.19	-0.919	0.077	-1.051	-0.972	1.1	-0.862	-0.009	1.036	0.168	0.932	-0.164	1.824	1.697	-1.879	1.612	-0.067	-1.872	-0.407	-1.588	0.182	-1.843	-1.66	2.004	-1.451	0.026	1.783	0.287	1.636
-0.555	0.548	1	-0.534	0.197	-1.166	0.971	-0.868	0.146	-0.072	0.166	1.355	-0.998	0.849	0.524	-1.035	0.543	-0.815	0.007	-0.2	-1.382	0.917	-0.912	-0.552	0.9	-0.739	0.824	0.027	0.485	2.418	-1.622	1.578	1.028	-1.665	1.152	-1.453	0.128	-0.172	-2.488	1.739	-1.526	-0.973	1.673	-1.225	1.513
0.186	-0.641	1.13	-0.867	0.933	-0.09	0.58	-0.389	-1.067	0.661	-1.042	0.756	-0.333	-0.182	1.381	-0.972	0.766	0.58	-0.67	0.987	-0.762	0.215	0.112	-1.389	0.861	-0.871	-0.63	1.292	-1.736	1.294	-0.388	-0.224	2.432	-1.683	1.411	1.107	-1.147	1.795	-1.259	0.528	0.352	-2.402	1.636	-1.369	-1.107
-0.553	-0.32	1.091	-0.03	1.205	-0.402	0.531	-0.904	-0.728	-0.389	-0.997	0.887	-0.658	0.389	1.171	-0.395	1.324	0.166	0.323	0.946	-0.934	0.711	-0.38	-1.128	0.286	-1.325	-0.255	-0.56	-1.735	1.595	-1.241	0.728	2.05	-0.567	2.38	0.377	0.643	1.699	-1.616	1.366	-0.674	-1.91	0.483	-2.355	-0.402
0.128	-0.88	0.936	-0.521	1.11	0.253	0.347	-0.279	-1.167	0.392	-1.27	0.434	-0.155	-0.396	1.328	-0.545	0.881	0.915	-0.458	1.201	-0.431	0.134	0.367	-1.283	0.523	-0.902	-0.911	0.89	-2.207	0.797	-0.407	-0.68	2.378	-0.856	1.617	1.626	-0.661	2.237	-0.846	0.177	0.718	-2.351	0.966	-1.565	-1.656
-0.163	-0.624	1.127	-0.596	1.112	-0.171	0.649	-0.554	-0.964	0.276	-1.078	0.816	-0.6	-0.104	1.32	-0.892	1	0.485	-0.249	1.092	-0.814	0.433	-0.011	-1.334	0.769	-1.055	-0.494	0.697	-1.832	1.398	-1.051	-0.211	2.25	-1.427	1.817	0.902	-0.379	1.976	-1.4	0.888	0.103	-2.278	1.536	-1.697	-0.852
-0.348	-0.597	1.094	-0.91	0.59	-0.75	1.218	-0.069	-0.374	0.356	-0.768	1.112	-1.017	-0.375	0.945	-1.37	0.349	-0.237	-0.356	0.762	-1.176	0.959	0.263	-0.906	1.336	-0.414	0.189	0.632	-1.215	2.039	-1.734	-0.589	1.704	-2.345	0.693	-0.443	-0.589	1.291	-2.102	1.774	0.644	-1.547	2.354	-0.641	0.421
-0.935	-0.251	0.865	0.318	1.222	-0.283	0.557	-0.969	-0.652	-0.847	-0.954	0.668	-0.927	0.484	0.959	-0.217	1.361	0.204	0.807	0.942	-0.757	0.938	-0.467	-0.955	0.104	-1.361	-0.285	-1.357	-1.655	1.232	-1.671	0.775	1.712	-0.186	2.444	0.442	1.376	1.671	-1.166	1.701	-0.846	-1.611	0.279	-2.393	-0.443
-1.168	-0.193	0.496	0.522	1.16	0.001	0.643	-0.996	-0.454	-1.112	-0.864	0.262	-1.091	0.5	0.674	-0.044	1.395	0.337	1.023	0.792	-0.325	1.109	-0.528	-0.614	0.109	-1.364	-0.233	-1.922	-1.454	0.512	-1.997	0.805	1.147	-0.041	2.434	0.578	1.863	1.462	-0.699	2.023	-0.79	-1.03	0.079	-2.39	-0.61
-1.259	-0.26	0	0.4	1.239	0.029	0.883	-0.918	0.01	-1.065	-0.948	0.078	-1.309	0.463	-0.061	-0.28	1.393	0.021	1.035	0.95	0.031	1.354	-0.413	-0.055	0.321	-1.301	0.079	-1.922	-1.673	0.019	-2.323	0.735	-0.22	-0.507	2.41	-0.108	1.852	1.674	0.236	2.363	-0.886	-0.174	0.481	-2.404	0.154
-1.065	-0.59	-0.329	0.546	0.837	-0.802	0.563	-0.262	1.132	-0.999	-0.905	0.303	-1.016	-0.206	-0.92	0.001	0.675	-1.219	1.043	0.894	-0.295	1.051	0.21	0.935	0.023	-0.701	1.199	-1.745	-1.597	0.55	-1.765	-0.394	-1.699	-0.098	1.217	-2.125	1.754	1.714	-0.539	1.748	0.427	1.726	0.003	-1.334	2.084
-1.013	-0.62	-0.473	0.535	0.997	-0.671	0.511	-0.376	1.107	-0.91	-1.035	0.115	-0.992	-0.144	-1.01	0.04	0.839	-1.127	0.973	1.047	-0.15	0.978	0.164	0.981	-0.011	-0.869	1.102	-1.637	-1.792	0.119	-1.868	-0.189	-1.667	0.005	1.444	-1.892	1.756	1.831	-0.234	1.667	0.29	1.817	-0.001	-1.587	1.945
-1.1	-0.437	-0.498	0.328	1.229	-0.19	0.796	-0.808	0.687	-0.888	-1.031	-0.201	-1.183	0.214	-0.739	-0.266	1.296	-0.556	0.894	1.017	0.19	1.205	-0.23	0.755	0.297	-1.303	0.547	-1.649	-1.812	-0.363	-2.081	0.269	-1.312	-0.621	2.362	-0.857	1.622	1.814	0.321	2.165	-0.328	1.236	0.506	-2.268	0.981
-1.287	-0.143	-0.209	0.755	0.607	-0.826	0.499	-0.461	1.063	-1.292	-0.422	0.443	-1.148	0.153	-0.824	0.136	0.685	-1.189	1.285	0.47	-0.367	1.106	-0.219	0.766	-0.166	-0.659	1.237	-2.253	-0.795	0.718	-1.919	0.315	-1.587	0.303	1.039	-2.165	2.26	0.879	-0.639	1.967	-0.343	1.37	-0.279	-1.102	2.237
-0.85	-0.725	-0.655	0.226	1.236	-0.331	0.709	-0.557	0.923	-0.581	-1.263	-0.275	-1.014	-0.115	-0.964	-0.328	1.118	-0.759	0.776	1.211	0.116	1.054	0.094	0.92	0.295	-1.152	0.812	-1.088	-2.195	-0.511	-1.842	-0.108	-1.65	-0.705	2.022	-1.23	1.19	2.166	0.344	1.766	0.151	1.745	0.476	-1.928	1.451
-0.89	-0.219	-0.885	0.244	1.191	0.341	0.651	-0.962	0.542	-0.69	-0.896	-0.75	-0.992	0.486	-0.921	-0.181	1.365	-0.181	0.648	0.886	0.822	0.979	-0.438	0.881	0.247	-1.379	0.142	-1.227	-1.665	-1.331	-1.718	0.89	-1.636	-0.238	2.433	-0.459	0.967	1.521	1.616	1.659	-0.79	1.556	0.547	-2.414	0.259
-0.656	-0.701	-0.881	0.719	1.045	-0.369	-0.033	-0.368	1.191	-0.815	-1.1	-0.329	-0.417	-0.233	-1.343	0.477	0.872	-1.023	0.891	1.097	0.316	0.441	0.158	1.235	-0.504	-0.85	1.005	-1.412	-1.925	-0.524	-0.861	-0.281	-2.314	0.707	1.649	-1.742	1.581	1.876	0.643	0.797	0.157	2.234	-0.885	-1.42	1.841
-1.072	-0.351	0.672	-0.156	0.537	-1.158	1.186	-0.238	0.464	-0.563	-0.63	1.099	-1.468	-0.041	0.169	-0.87	0.437	-1.03	0.569	0.564	-1.165	1.396	0.081	-0.129	0.838	-0.532	1.003	-0.957	-1.116	1.96	-2.519	0.049	0.266	-1.543	0.931	-1.758	1.112	1.016	-1.998	2.465	0.168	-0.197	1.54	-0.926	1.78
-0.97	-0.7	-0.454	0.965	0.365	-0.783	0.014	0.351	1.237	-1.182	-0.691	0.22	-0.645	-0.632	-1.076	0.568	0.048	-1.254	1.254	0.658	-0.222	0.647	0.64	1.054	-0.621	0.016	1.279	-2.186	-1.128	0.346	-1.1	-1.178	-1.876	0.973	-0.054	-2.237	2.229	1.072	-0.392	1.036	1.258	1.845	-0.973	-0.009	2.31
-0.735	-0.408	-0.946	1.265	-0.201	-0.032	-0.572	0.684	0.962	-1.278	-0.074	-0.592	-0.119	-0.68	-1.199	1.126	-0.563	-0.615	1.251	0.189	0.55	0.096	0.735	1.209	-1.176	0.571	0.61	-2.239	-0.163	-1.12	-0.109	-1.395	-1.981	2.07	-0.969	-1.096	2.288	0.243	1.053	0.229	1.296	2.101	-2.137	0.81	1.079
-0.041	-0.024	-1.295	1.053	-0.279	0.616	-1.076	0.216	0.667	-0.713	0.133	-1.213	0.619	-0.208	-1.234	1.324	-0.314	-0.019	0.658	-0.219	1.189	-0.697	0.099	1.211	-1.343	0.305	0.04	-1.148	0.423	-2.129	1.209	-0.151	-2.145	2.34	-0.576	-0.045	1.233	-0.272	2.013	-1.081	0.166	2.245	-2.4	0.613	0.089
0.999	-0.152	0.76	-0.996	-0.872	-0.008	-0.025	1.016	-0.801	1.3	0.413	0.394	0.582	-0.694	1.036	-0.665	-1.181	0.536	-1.219	-0.472	-0.56	-0.621	0.743	-1.01	0.573	1.173	-0.511	2.236	0.77	0.859	1.156	-1.348	1.742	-1.071	-2.08	1.003	-2.193	-0.741	-0.929	-1.099	1.318	-1.775	1.021	2.1	-0.784
0.446	-0.843	0.916	-0.597	-0.458	-1.064	0.222	1.242	0.055	0.67	-0.222	1.214	0.201	-1.387	0.498	-0.447	-1.083	-0.772	-0.678	0.216	-1.248	-0.106	1.294	-0.593	0.529	1.045	0.681	1.037	-0.352	2.226	0.11	-2.236	1.028	-0.797	-1.924	-1.311	-1.217	0.43	-2.103	-0.275	2.363	-0.927	0.972	1.857	1.307
-0.56	-1.131	0.018	0.327	0.551	-1.136	0.171	0.632	1.079	-0.548	-1.058	0.745	-0.529	-1.068	-0.722	0.07	-0.023	-1.404	0.537	1.072	-0.744	0.4	1.16	0.65	-0.077	0.041	1.382	-0.801	-1.843	1.397	-0.836	-2.032	-1.204	0.31	-0.234	-2.46	0.913	1.959	-1.297	0.759	1.909	1.218	-0.197	0.117	2.439
-0.044	-0.197	-1.239	0.094	1.174	0.458	-0.079	-0.99	0.815	-0.048	-0.871	-1.082	-0.032	0.486	-1.253	0.098	1.372	-0.237	0.077	0.851	1.107	-0.041	-0.511	1.341	-0.12	-1.357	0.204	-0.036	-1.461	-1.933	-0.137	0.943	-2.25	0.182	2.435	-0.493	0.176	1.416	1.95	0.08	-0.923	2.316	-0.198	-2.38	0.331
1.245	0.135	-0.271	-0.82	0.955	-0.365	-0.426	-1.042	0.595	1.282	-0.497	0.024	1.068	0.77	-0.54	-0.238	1.298	-0.596	-1.31	0.504	-0.112	-1.068	-0.72	0.558	0.265	-1.24	0.569	2.229	-0.995	0.067	1.929	1.235	-0.907	-0.415	2.25	-1.093	-2.312	0.947	0.091	-1.884	-1.286	0.941	0.453	-2.268	0.998
1.085	0.632	-0.225	-0.998	0.626	0.52	-0.044	-1.264	-0.243	1.324	0.01	-0.47	0.735	1.179	0.043	-0.583	1.191	0.524	-1.297	-0.003	0.468	-0.69	-1.217	-0.012	0.613	-1.173	-0.432	2.357	-0.003	-0.707	1.125	2.172	-0.035	-1.024	2.084	0.881	-2.344	-0.079	0.733	-1.256	-2.177	-0.091	1.04	-1.984	-0.903
0.423	1.2	-0.117	-1.26	-0.269	0.071	0.849	-0.975	0.104	1.067	0.941	-0.038	-0.256	1.317	-0.183	-1.314	0.42	0.002	-1.063	-0.941	0.143	0.264	-1.402	0.146	1.331	-0.442	0.065	1.806	1.706	-0.171	-0.541	2.381	-0.226	-2.292	0.865	-0.063	-1.928	-1.622	0.158	0.577	-2.45	0.163	2.349	-0.774	0.004
-0.788	0.892	0.43	-0.482	-1.021	-0.546	1.303	0.101	0.141	-0.197	1.159	0.702	-1.292	0.503	0.129	-1.08	-0.676	-0.49	0.181	-1.248	-0.54	1.309	-0.549	-0.19	1.158	0.745	0.446	-0.307	2.203	1.03	-2.291	1.025	0.166	-1.991	-1.195	-0.883	0.258	-2.243	-0.959	2.271	-1.018	-0.255	1.982	1.294	0.844
-1.139	-0.406	-0.478	1.096	-0.422	-0.531	0.024	0.867	0.976	-1.409	0.014	0.021	-0.742	-0.774	-0.927	0.707	-0.772	-0.982	1.36	-0.011	-0.035	0.718	0.794	0.921	-0.677	0.843	0.924	-2.525	0.008	0.033	-1.247	-1.425	-1.584	1.207	-1.484	-1.628	2.484	-0.081	0.031	1.31	1.34	1.674	-1.185	1.548	1.552
-1.069	-0.566	0.44	0.455	-0.219	-1.173	0.603	0.837	0.761	-1.012	-0.182	1.018	-1.01	-0.874	-0.173	-0.075	-0.655	-1.215	0.944	0.247	-0.992	1.027	0.914	0.236	0.1	0.672	1.191	-1.733	-0.426	1.791	-1.785	-1.611	-0.494	-0.188	-1.237	-2.142	1.587	0.439	-1.861	1.833	1.564	0.461	0.313	1.148	2.178
-0.738	-0.899	0.537	0.254	-0.029	-1.267	0.563	0.892	0.788	-0.555	-0.579	1.141	-0.825	-1.124	-0.12	-0.194	-0.586	-1.29	0.682	0.523	-1.093	0.869	1.115	0.191	0.209	0.565	1.308	-1.144	-1.015	1.956	-1.475	-1.907	-0.265	-0.325	-0.979	-2.303	1.069	0.968	-2.017	1.436	2.057	0.231	0.251	0.962	2.26
-0.922	-0.563	0.747	0.605	-0.67	-0.892	0.324	1.262	0.17	-0.972	0.097	1.014	-0.78	-1.151	0.389	0.191	-1.226	-0.646	0.954	-0.04	-1.023	0.786	1.18	-0.339	-0.162	1.209	0.662	-1.62	0.132	1.916	-1.322	-2.13	0.649	0.428	-2.114	-1.232	1.564	-0.101	-1.922	1.324	2.028	-0.677	-0.391	2.117	1.208
-0.046	-0.633	1.104	0.248	-0.626	-1.078	-0.184	1.262	0.05	-0.221	-0.021	1.404	0.136	-1.171	0.686	0.335	-1.194	-0.697	0.134	0.006	-1.329	-0.104	1.186	-0.624	-0.237	1.202	0.739	-0.409	-0.095	2.473	0.239	-2.041	1.127	0.599	-2.039	-1.298	0.228	0.023	-2.402	-0.162	2.024	-1.263	-0.538	2.122	1.183
0.988	-0.788	0.213	-0.668	-0.063	-1.076	-0.353	0.882	0.861	0.986	-0.537	0.856	0.878	-0.947	-0.449	-0.169	-0.543	-1.222	-1.09	0.435	-0.808	-0.845	1.09	0.399	0.163	0.575	1.218	1.779	-0.918	1.448	1.523	-1.761	-0.789	-0.357	-1.05	-2.161	-1.888	0.72	-1.45	-1.366	1.933	0.741	0.387	1.004	2.216
0.807	-0.873	0.472	-0.431	-0.115	-1.182	-0.457	0.948	0.785	0.754	-0.49	1.091	0.75	-1.166	-0.184	-0.029	-0.673	-1.219	-0.805	0.446	-1.001	-0.762	1.148	0.17	-0.102	0.642	1.321	1.387	-0.907	1.822	1.54	-1.912	-0.441	0.007	-1.15	-2.152	-1.214	0.893	-1.921	-1.437	2.031	0.241	-0.09	1.137	2.27
1.01	-0.733	0.297	-0.709	-0.221	-1.013	-0.296	0.959	0.747	1.078	-0.306	0.839	0.836	-1.079	-0.281	-0.259	-0.73	-1.11	-1.072	0.326	-0.793	-0.822	1.057	0.275	0.252	0.745	1.143	1.876	-0.517	1.484	1.412	-1.911	-0.469	-0.539	-1.358	-1.997	-1.895	0.468	-1.493	-1.471	1.93	0.448	0.603	1.375	1.954
0.745	-1.007	0.112	-0.657	0.187	-1.078	-0.145	0.8	1.014	0.871	-0.759	0.754	0.52	-1.151	-0.533	-0.387	-0.43	-1.29	-0.86	0.782	-0.731	-0.607	1.111	0.604	0.328	0.4	1.309	1.607	-1.288	1.273	1.064	-1.963	-1.017	-0.565	-0.594	-2.356	-1.545	1.228	-1.404	-1.091	1.938	1.158	0.664	0.725	2.232
0.691	-0.917	0.643	-0.779	-0.329	-0.985	0.127	1.236	0.322	0.901	-0.373	1.046	0.406	-1.368	0.17	-0.521	-1.018	-0.846	-0.947	0.398	-1.012	-0.341	1.365	-0.202	0.594	0.973	0.797	1.618	-0.529	1.858	0.656	-2.418	0.262	-0.869	-1.724	-1.536	-1.757	0.625	-1.761	-0.705	2.36	-0.322	0.966	1.71	1.545
0.685	-1.051	0.268	-0.978	-0.086	-0.877	0.282	1.129	0.576	1.079	-0.614	0.677	0.203	-1.376	-0.175	-0.832	-0.761	-0.907	-1.011	0.598	-0.756	-0.253	1.388	0.18	0.79	0.745	0.904	1.972	-0.99	1.185	0.45	-2.45	-0.235	-1.458	-1.327	-1.571	-1.832	1.047	-1.269	-0.495	2.374	0.482	1.387	1.365	1.484
1.001	-0.26	0.783	-1.002	-0.781	-0.028	0.013	1.006	-0.807	1.306	0.281	0.456	0.583	-0.779	1.015	-0.629	-1.164	0.442	-1.254	-0.311	-0.494	-0.662	0.81	-0.977	0.684	1.078	-0.566	2.303	0.499	0.826	1.038	-1.297	1.87	-1.19	-2.103	0.76	-2.251	-0.494	-0.863	-1.109	1.507	-1.625	1.18	1.973	-0.843
0.571	-0.863	0.778	-1.175	-0.271	-0.389	0.574	1.087	-0.352	1.092	-0.385	0.736	-0.025	-1.261	0.739	-1.111	-0.859	-0.016	-1.109	0.345	-0.72	-0.028	1.213	-0.693	1.108	0.834	0.042	1.978	-0.554	1.239	0.057	-2.134	1.276	-1.958	-1.463	0.022	-1.956	0.585	-1.298	-0.007	2.127	-1.326	1.958	1.552	-0.002
0.793	-1	0.257	-1.324	-0.162	-0.031	0.486	1.097	-0.336	1.294	-0.555	0.098	0.189	-1.347	0.364	-1.129	-0.797	0.218	-1.379	0.481	-0.294	-0.211	1.288	-0.367	1.131	0.774	-0.279	2.34	-0.919	0.22	0.472	-2.266	0.907	-1.962	-1.356	0.579	-2.34	0.939	-0.476	-0.385	2.327	-0.625	1.981	1.43	-0.346
0.267	-1.041	0.674	-0.666	-0.132	-1.124	0.294	1.189	0.468	0.502	-0.572	1.13	-0.017	-1.384	0.152	-0.642	-0.831	-1	-0.639	0.579	-1.121	0.003	1.404	-0.14	0.544	0.842	1.02	1.052	-1.091	1.901	0.057	-2.493	0.231	-0.969	-1.522	-1.789	-0.968	1.124	-1.989	0.071	2.471	-0.17	1.007	1.472	1.773
0.636	-1.001	0.453	-1.141	-0.19	-0.562	0.447	1.187	0.09	1.113	-0.503	0.626	0.081	-1.398	0.209	-1.003	-0.874	-0.444	-1.159	0.518	-0.608	-0.129	1.38	-0.218	0.957	0.866	0.389	1.943	-0.793	1.289	0.248	-2.427	0.461	-1.711	-1.55	-0.84	-2.011	0.888	-1.147	-0.116	2.408	-0.466	1.785	1.485	0.75
-0.092	-0.368	1.236	-0.838	-0.386	-0.876	0.877	0.816	-0.345	0.522	-0.014	1.321	-0.706	-0.672	1.012	-1.142	-0.694	-0.329	-0.441	-0.023	-1.324	0.539	0.783	-0.959	1.1	0.767	0.313	0.983	-0.125	2.295	-1.171	-1.198	1.826	-1.919	-1.307	-0.608	-0.884	-0.113	-2.332	1.174	1.201	-1.708	1.944	1.396	0.494
-0.616	-0.096	1.108	-0.497	-0.492	-1.057	1.108	0.583	-0.054	-0.054	0.279	1.364	-1.101	-0.466	0.725	-1.054	-0.694	-0.649	0.121	-0.249	-1.345	1.121	0.382	-0.719	0.955	0.736	0.617	-0.17	0.314	2.425	-1.976	-0.569	1.306	-1.924	-1.131	-1.139	0.201	-0.34	-2.398	2.135	0.492	-1.222	1.747	1.245	1.034
-0.625	-0.397	1.05	-0.449	-0.311	-1.176	1.045	0.71	0.131	-0.12	-0.057	1.401	-1.072	-0.672	0.581	-0.996	-0.659	-0.846	0.156	0.044	-1.374	1.052	0.707	-0.569	0.912	0.641	0.817	-0.108	-0.248	2.478	-1.827	-1.327	1.021	-1.837	-0.87	-1.513	0.259	0.16	-2.416	1.741	1.346	-0.972	1.841	0.937	1.391
-0.761	-0.51	0.892	-0.342	-0.028	-1.22	1.054	0.632	0.376	-0.246	-0.272	1.356	-1.212	-0.663	0.342	-0.925	-0.362	-0.988	0.273	0.321	-1.31	1.107	0.788	-0.32	0.889	0.409	1.034	-0.232	-0.72	2.305	-2.03	-1.325	0.5	-1.652	-0.674	-1.741	0.577	0.435	-2.39	1.906	1.447	-0.646	1.547	0.614	1.859
-0.821	-0.63	0.794	-0.103	-0.111	-1.302	0.927	0.752	0.514	-0.421	-0.358	1.334	-1.129	-0.833	0.172	-0.655	-0.509	-1.134	0.461	0.301	-1.323	1.052	0.875	-0.174	0.697	0.55	1.137	-0.85	-0.533	2.299	-1.899	-1.554	0.261	-1.13	-0.9	-2.045	0.78	0.514	-2.306	1.933	1.542	-0.27	1.161	0.905	2.049
-0.865	-0.976	0.268	0.627	0.021	-1.128	0.28	0.934	0.887	-0.935	-0.619	0.875	-0.695	-1.226	-0.373	0.285	-0.607	-1.251	0.918	0.64	-0.869	0.723	1.177	0.404	-0.196	0.587	1.278	-1.641	-1.108	1.556	-1.272	-2.105	-0.616	0.472	-1.071	-2.196	1.387	1.224	-1.682	1.335	1.986	0.664	-0.38	1.122	2.209
-1.274	-0.13	-0.045	0.667	-0.057	-1.086	0.617	0.225	1.116	-1.236	-0.033	0.647	-1.169	-0.209	-0.731	0.052	-0.182	-1.394	1.21	0.084	-0.657	1.184	0.224	0.722	-0.018	0.207	1.377	-2.164	-0.13	1.123	-2.091	-0.338	-1.302	0.023	-0.283	-2.48	2.168	-0.024	-1.132	2.085	0.313	1.368	-0.044	0.37	2.458
-1.261	0.021	0.17	0.502	0.597	-1.032	0.763	-0.606	0.855	-1.097	-0.381	0.723	-1.279	0.425	-0.399	-0.141	0.747	-1.221	1.085	0.375	-0.734	1.265	-0.38	0.428	0.179	-0.757	1.189	-1.984	-0.656	1.212	-2.264	0.67	-0.665	-0.163	1.385	-2.091	1.894	0.673	-1.262	2.224	-0.671	0.783	0.281	-1.431	2.037
-1.195	0.351	0.306	0.897	0.89	-0.297	0.313	-1.232	-0.06	-1.317	-0.328	0.373	-0.946	0.994	0.191	0.37	1.322	-0.165	1.321	0.347	-0.4	0.947	-0.996	-0.281	-0.339	-1.319	0.16	-2.23	-0.651	0.826	-1.664	1.776	0.355	0.685	2.406	-0.175	2.328	0.683	-0.76	1.5	-1.889	-0.476	-0.654	-2.346	0.352
-0.568	-0.531	0.986	1.046	0.733	0.194	-0.433	-0.24	-1.193	-0.984	-0.787	0.498	-0.079	-0.224	1.362	0.964	0.567	0.877	1.02	0.805	-0.513	0.061	0.239	-1.401	-0.874	-0.69	-0.854	-1.75	-1.421	0.9	-0.253	-0.25	2.414	1.546	1.17	1.546	1.832	1.415	-0.873	0.131	0.341	-2.494	-1.614	-1.166	-1.463
-1.15	0.203	0.513	1.029	0.601	0.525	0.13	-0.75	-1.045	-1.352	-0.188	-0.009	-0.812	0.583	0.972	0.529	0.877	0.975	1.407	0.277	0.016	0.833	-0.591	-0.989	-0.584	-0.832	-0.979	-2.459	-0.386	0.04	-1.458	0.911	1.74	1.008	1.4	1.797	2.498	0.366	-0.028	1.494	-1.094	-1.771	-1.105	-1.323	-1.763
-0.752	0.667	0.824	1.269	-0.138	0.235	-0.527	-0.513	-1.076	-1.295	0.547	0.376	-0.129	0.715	1.172	1.119	0.211	0.787	1.282	-0.462	-0.35	0.116	-0.787	-1.163	-1.115	-0.185	-0.862	-2.237	1.024	0.67	-0.207	1.187	2.17	1.986	0.434	1.398	2.179	-1.01	-0.535	0.27	-1.385	-2.132	-1.968	-0.288	-1.53
-0.53	0.734	0.906	1.275	-0.148	-0.046	-0.748	-0.577	-0.874	-1.128	0.508	0.605	0.133	0.887	1.094	1.27	0.255	0.541	1.137	-0.55	-0.616	-0.147	-0.808	-1.136	-1.275	-0.269	-0.521	-2.06	0.856	1.155	0.213	1.492	1.991	2.275	0.524	0.958	1.97	-0.826	-1.258	-0.192	-1.491	-1.948	-2.197	-0.576	-0.865
-0.497	0.019	1.152	1.204	-0.302	-0.163	-0.709	0.396	-1.006	-1.091	0.144	0.794	0.155	-0.096	1.381	1.169	-0.419	0.546	1.1	-0.127	-0.857	-0.13	0.303	-1.352	-1.209	0.462	-0.552	-1.905	0.222	1.39	0.215	-0.297	2.443	2.122	-0.844	0.914	1.942	-0.463	-1.421	-0.211	0.344	-2.342	-2.159	0.772	-0.944
-0.289	-0.648	1.083	1.213	0.29	-0.292	-0.955	0.311	-0.809	-0.95	-0.6	0.865	0.395	-0.616	1.179	1.376	-0.078	0.303	0.914	0.623	-0.853	-0.467	0.647	-1.181	-1.34	-0.087	-0.358	-1.652	-1.155	1.5	0.806	-1.093	2.107	2.425	-0.043	0.563	1.631	1.045	-1.564	-0.743	1.363	-1.966	-2.396	-0.007	-0.596
-0.405	-0.74	0.977	0.822	0.97	0.22	-0.466	-0.236	-1.176	-0.782	-1.091	0.513	0.017	-0.313	1.334	0.824	0.765	0.882	0.721	1.075	-0.468	-0.078	0.313	-1.358	-0.819	-0.763	-0.853	-1.503	-1.811	0.921	0.153	-0.568	2.312	1.581	1.201	1.563	1.232	1.923	-0.809	-0.063	0.587	-2.443	-1.282	-1.319	-1.596
0.182	0.214	1.281	0.605	0.709	-0.881	-0.723	-0.981	-0.393	-0.203	-0.364	1.398	0.558	0.743	1.032	0.832	1.078	-0.321	0.309	0.259	-1.346	-0.57	-0.774	-1.054	-0.775	-1.079	0.307	-0.534	-0.496	2.427	1.021	1.498	1.702	1.352	1.905	-0.575	0.667	0.47	-2.314	-1.122	-1.367	-1.778	-1.534	-1.873	0.521
0.951	0.054	0.841	0.023	0.709	-1.042	-0.976	-0.815	0.186	0.611	-0.492	1.148	1.184	0.582	0.44	0.612	0.938	-0.762	-0.572	0.39	-1.212	-1.217	-0.484	-0.407	-0.622	-1.056	0.754	1.079	-0.753	2.098	2.103	1.067	0.694	1.075	1.804	-1.261	-0.956	0.694	-2.148	-2.256	-0.853	-0.692	-1.042	-1.837	1.347
1.274	0.137	0.011	-0.701	0.632	-0.879	-0.596	-0.71	0.904	1.227	-0.262	0.597	1.177	0.528	-0.568	-0.068	0.875	-1.098	-1.265	0.328	-0.553	-1.182	-0.522	0.536	0.057	-0.809	1.172	2.168	-0.372	1.014	2.097	0.73	-1.066	0.017	1.461	-1.969	-2.246	0.533	-1.057	-2.004	-0.97	0.992	0.022	-1.521	2.001
1.284	-0.184	0.116	-0.459	0.857	-0.869	-0.822	-0.714	0.7	1.09	-0.655	0.61	1.34	0.3	-0.417	0.215	0.983	-0.99	-1.085	0.629	-0.646	-1.325	-0.351	0.353	-0.229	-1.003	0.967	1.856	-1.108	1.258	2.343	0.585	-0.555	0.409	1.727	-1.79	-1.892	1.204	-1.146	-2.361	-0.648	0.583	-0.36	-1.663	1.775
1.156	-0.514	0.123	-0.099	1.1	-0.619	-1.032	-0.592	0.497	0.791	-1.006	0.472	1.395	0.038	-0.251	0.606	1.036	-0.738	-0.785	1.028	-0.439	-1.356	-0.016	0.258	-0.592	-1.093	0.699	1.312	-1.834	0.892	2.503	0.094	-0.35	0.916	1.954	-1.189	-1.342	1.869	-0.784	-2.434	-0.09	0.253	-1.014	-1.979	1.176
1.178	0.351	0.383	-0.541	0.529	-1.042	-0.685	-0.806	0.689	1.096	-0.164	0.864	1.119	0.845	-0.131	0.067	0.888	-1.038	-1.094	0.121	-0.925	-1.191	-0.685	0.214	-0.109	-0.829	1.089	1.943	-0.32	1.484	2.105	1.267	-0.31	0.148	1.484	-1.878	-1.888	0.173	-1.638	-1.996	-1.304	0.317	-0.198	-1.475	1.954
0.911	0.553	0.737	-0.242	0.463	-1.164	-0.649	-1.017	0.477	0.707	0.048	1.197	1.025	0.997	0.195	0.251	0.935	-1.019	-0.72	-0.055	-1.171	-0.937	-1.01	-0.136	-0.28	-0.917	1.052	1.237	0.039	2.188	1.653	1.79	0.273	0.498	1.591	-1.861	-1.158	-0.114	-2.107	-1.7	-1.723	-0.39	-0.576	-1.581	1.78
0.851	0.149	0.97	-0.358	0.976	-0.699	-0.535	-1.144	-0.198	0.732	-0.537	1.093	0.865	0.811	0.746	0.107	1.34	-0.281	-0.787	0.5	-1.029	-0.904	-0.817	-0.694	-0.114	-1.343	0.338	1.317	-0.939	1.942	1.617	1.527	1.186	0.161	2.417	-0.516	-1.302	0.855	-1.92	-1.517	-1.37	-1.381	-0.177	-2.443	0.516
0.468	0.821	0.86	0.466	-0.017	-1.186	-0.974	-0.771	0.314	-0.028	0.573	1.275	0.9	0.975	0.351	0.877	0.516	-0.946	0.013	-0.554	-1.288	-0.927	-0.971	-0.334	-0.931	-0.462	0.915	0.063	1.057	2.241	1.635	1.7	0.612	1.43	0.989	-1.703	-0.003	-0.979	-2.3	-1.586	-1.816	-0.517	-1.443	-1.029	1.694
0.914	0.851	-0.361	-0.987	-0.225	-0.76	0.048	-0.535	1.173	1.199	0.696	0.264	0.527	0.909	-0.944	-0.668	0.246	-1.173	-1.199	-0.64	-0.252	-0.575	-0.803	1.023	0.656	-0.19	1.204	2.092	1.254	0.447	0.953	1.604	-1.669	-1.201	0.164	-2.132	-2.057	-1.265	-0.525	-0.965	-1.585	1.706	1.237	-0.389	2.05
1.068	0.597	-0.322	-0.757	-0.454	-0.917	-0.341	-0.146	1.244	1.137	0.694	0.363	0.869	0.439	-0.972	-0.297	-0.152	-1.339	-1.133	-0.704	-0.39	-0.88	-0.465	0.999	0.233	0.18	1.351	2.053	1.173	0.649	1.638	0.75	-1.702	-0.492	-0.232	-2.405	-2.011	-1.304	-0.673	-1.64	-0.819	1.717	0.523	0.44	2.403
1.014	0.092	-0.8	-1.136	-0.441	-0.453	0.09	0.355	1.228	1.332	0.371	-0.26	0.582	-0.221	-1.251	-0.779	-0.51	-1.066	-1.372	-0.314	0.205	-0.583	0.179	1.294	0.743	0.509	1.02	2.369	0.771	-0.427	1	-0.184	-2.223	-1.372	-0.838	-1.885	-2.343	-0.741	0.446	-0.911	0.177	2.281	1.334	0.801	1.866
0.7	-0.42	-0.988	-0.806	1.021	-0.17	0.1	-0.574	1.133	0.941	-0.868	-0.515	0.385	0.097	-1.351	-0.562	1.009	-0.846	-0.956	0.918	0.526	-0.341	-0.076	1.368	0.52	-1.014	0.762	1.584	-1.682	-0.89	0.697	0.021	-2.391	-1.091	1.75	-1.479	-1.644	1.665	0.921	-0.607	-0.157	2.447	1.073	-1.663	1.449
-0.392	-0.35	-1.149	-0.664	0.849	0.675	1.102	-0.47	0.441	0.192	-0.761	-1.158	-0.935	0.091	-1.006	-1.112	0.81	0.104	-0.14	0.79	1.158	0.992	-0.046	1.008	1.112	-0.815	-0.186	0.246	-1.401	-2.043	-1.511	0.354	-1.852	-1.884	1.513	0.295	-0.344	1.331	2.083	1.549	-0.288	1.841	1.834	-1.579	-0.244
-0.346	-0.654	-1.067	-0.779	0.884	0.49	1.173	-0.205	0.514	0.266	-0.993	-0.992	-0.904	-0.23	-1.03	-1.218	0.715	-0.045	-0.252	0.958	0.958	1	0.316	0.954	1.221	-0.704	0.006	0.274	-1.829	-1.643	-1.621	-0.479	-1.817	-2.098	1.28	0.035	-0.511	1.627	1.741	1.655	0.496	1.781	2.189	-1.155	0.053
-0.907	0.753	-0.486	0.464	0.253	1.156	0.354	-1.072	-0.61	-0.898	0.298	-1.011	-0.844	1.112	0.113	0.016	0.799	1.164	0.846	-0.334	1.035	0.752	-1.185	-0.039	-0.082	-0.848	-1.117	-1.43	0.512	-1.961	-1.24	2.123	0.117	0.096	1.594	1.886	1.614	-0.602	1.786	1.476	-1.948	-0.047	-0.308	-1.522	-1.926
-0.365	-0.575	-1.069	-0.871	0.672	0.696	1.229	-0.054	0.368	0.3	-0.718	-1.119	-0.985	-0.362	-0.894	-1.307	0.468	0.202	-0.335	0.812	1.106	0.998	0.361	0.892	1.312	-0.459	-0.197	0.504	-1.218	-2.089	-1.791	-0.752	-1.528	-2.327	0.805	0.369	-0.589	1.301	2.03	1.833	0.552	1.602	2.387	-0.79	-0.373
-0.453	-0.372	-1.141	-0.794	0.603	0.793	1.233	-0.157	0.314	0.23	-0.537	-1.268	-1.089	-0.151	-0.898	-1.288	0.454	0.301	-0.213	0.693	1.192	1.065	0.215	0.89	1.263	-0.498	-0.299	0.408	-1.059	-2.175	-1.87	-0.351	-1.504	-2.253	0.715	0.568	-0.356	1.205	2.126	1.891	0.29	1.591	2.212	-0.977	-0.526
-0.104	0.656	-1.123	-1.037	-0.426	0.634	1.174	-0.205	0.491	0.592	0.719	-1.115	-0.787	0.534	-0.995	-1.393	-0.156	0.106	-0.559	-0.631	1.097	0.811	-0.529	1.014	1.412	0.122	-0.1	0.988	1.126	-2.04	-1.365	0.89	-1.816	-2.455	-0.349	0.174	-1.068	-1.267	1.872	1.358	-0.752	1.869	2.466	0.292	-0.068
-1.259	0.117	-0.008	0.597	-0.539	1.02	0.733	0.527	-0.951	-1.153	0.43	-0.624	-1.217	-0.196	0.618	-0.057	-0.641	1.268	1.199	-0.368	0.664	1.283	0.301	-0.593	0.114	0.721	-1.191	-2.044	0.58	-1.288	-2.215	-0.362	1.133	-0.263	-1.191	2.193	2.084	-0.706	1.126	2.204	0.259	-1.133	0.065	1.171	-2.174
-0.934	-0.087	-0.859	1.048	-0.765	-0.078	-0.105	0.853	0.96	-1.237	0.432	-0.478	-0.517	-0.591	-1.138	0.759	-0.955	-0.659	1.215	-0.498	0.517	0.519	0.585	1.178	-0.717	1.027	0.632	-2.22	0.668	-0.891	-0.992	-1.03	-2.044	1.297	-1.711	-1.19	2.245	-0.739	0.853	0.935	1.038	2.063	-1.286	1.774	1.156
-0.355	0.745	-0.967	0.784	-1.019	-0.201	-0.388	0.272	1.206	-0.725	1.079	-0.486	0.065	0.338	-1.33	0.73	-0.822	-0.871	0.747	-1.108	0.493	0	-0.302	1.364	-0.721	0.808	0.92	-1.278	1.842	-0.981	-0.021	0.513	-2.357	1.338	-1.379	-1.592	1.311	-1.955	0.901	-0.08	-0.44	2.412	-1.367	1.425	1.527
-0.228	-0.204	-1.244	0.158	-0.993	0.764	0.095	1.205	0.475	-0.228	0.492	-1.263	-0.201	-0.872	-1.092	0.02	-1.381	0.172	0.27	-0.49	1.269	0.233	0.913	1.087	-0.037	1.357	-0.186	-0.441	0.895	-2.263	-0.345	-1.626	-1.808	0.138	-2.413	0.381	0.485	-0.939	2.185	0.294	1.617	1.92	-0.189	2.447	-0.402
1.011	-0.544	-0.565	-0.627	-0.6	0.921	-0.365	1.178	-0.354	1.022	-0.025	-0.987	0.893	-1.003	-0.075	-0.144	-1.111	0.863	-1.047	-0.017	0.863	-0.861	1.142	0.157	0.182	1.092	-0.815	1.785	0.033	-1.771	1.505	-1.842	-0.16	-0.245	-1.991	1.544	-1.76	-0.071	1.675	-1.632	1.923	0.242	0.302	1.869	-1.536
-0.929	-0.839	0.263	1.13	-0.418	-0.487	-0.184	1.234	0.265	-1.337	-0.288	0.449	-0.421	-1.289	0.06	0.85	-1.062	-0.438	1.289	0.263	-0.484	0.471	1.286	0.018	-0.813	1.035	0.491	-2.299	-0.59	0.77	-0.759	-2.297	-0.043	1.464	-1.804	-0.761	2.229	0.54	-0.834	0.806	2.297	0.061	-1.48	1.908	0.709
-0.935	-0.727	0.508	1.14	-0.504	-0.116	-0.197	1.233	-0.26	-1.303	-0.151	0.423	-0.457	-1.222	0.55	0.849	-1.124	0.112	1.302	0.164	-0.301	0.499	1.248	-0.425	-0.87	1.088	-0.047	-2.329	-0.255	0.655	-0.837	-2.175	0.866	1.536	-1.914	-0.013	2.272	0.325	-0.726	0.961	2.197	-0.743	-1.623	1.819	-0.351
-1.229	-0.38	0.306	1.001	-0.778	0.188	0.19	1.142	-0.547	-1.434	0.283	0.061	-0.902	-1.005	0.496	0.514	-1.238	0.446	1.37	-0.226	-0.096	0.853	0.962	-0.56	-0.488	1.185	-0.472	-2.416	0.501	0.231	-1.48	-1.724	1.034	1.014	-2.173	0.72	2.398	-0.48	-0.031	1.464	1.758	-1.036	-0.891	2.156	-0.792
-0.695	-0.229	1.068	1.229	-0.441	-0.146	-0.579	0.613	-0.989	-1.219	0.085	0.695	-0.093	-0.525	1.312	1.129	-0.716	0.508	1.188	-0.127	-0.792	0.036	0.488	-1.312	-1.148	0.66	-0.568	-2.053	0.281	1.379	-0.269	-0.964	2.29	2.009	-1.116	0.934	2.123	-0.231	-1.313	0.251	0.942	-2.189	-1.954	1.223	-0.945
0.598	-0.537	0.997	0.636	0.207	-1.08	-1.264	0.28	0.048	-0.017	-0.459	1.299	1.135	-0.559	0.581	1.172	-0.073	-0.712	0.025	0.44	-1.333	-1.184	0.5	-0.627	-1.204	0.032	0.707	0.025	-0.779	2.317	2.096	-0.961	1.036	2.124	0.018	-1.198	0.029	0.944	-2.345	-2.04	0.999	-1.033	-2.161	-0.101	1.306
-0.198	0.818	0.936	0.915	0.204	-0.898	-0.736	-1.049	-0.087	-0.721	0.39	1.134	0.337	1.143	0.633	1.029	0.76	-0.516	0.702	-0.381	-1.191	-0.373	-1.14	-0.701	-1.019	-0.835	0.525	-1.158	0.729	2.071	0.619	2.145	1.043	1.836	1.459	-0.811	1.164	-0.71	-2.036	-0.713	-2.083	-1.161	-1.704	-1.477	1.01
0.298	1.047	0.643	0.544	-0.195	-1.125	-0.867	-0.839	0.507	-0.163	0.783	1.111	0.715	1.19	0.098	0.891	0.388	-0.997	0.137	-0.749	-1.121	-0.761	-1.175	-0.107	-0.877	-0.406	1.074	-0.16	1.481	1.932	1.278	2.053	0.268	1.636	0.629	-1.752	0.17	-1.37	-2.074	-1.164	-2.14	-0.194	-1.702	-0.683	1.762
-0.262	1.262	-0.055	1.154	-0.444	0.305	-0.929	-0.854	-0.247	-0.938	1.067	-0.217	0.433	1.309	0.123	1.309	0.246	0.349	0.865	-1.087	0.226	-0.425	-1.37	-0.118	-1.33	-0.249	-0.356	-1.548	1.949	-0.408	0.802	2.333	0.123	2.421	0.43	0.545	1.486	-1.87	0.479	-0.733	-2.365	-0.129	-2.341	-0.393	-0.618
-0.817	0.991	-0.188	0.964	0.137	0.858	-0.181	-1.122	-0.649	-1.176	0.546	-0.633	-0.362	1.328	0.277	0.76	0.819	0.929	1.047	-0.558	0.698	0.349	-1.372	-0.28	-0.698	-0.749	-0.94	-2.055	0.964	-1.086	-0.725	2.297	0.482	1.41	1.371	1.522	1.954	-0.945	1.256	0.694	-2.406	-0.535	-1.2	-1.296	-1.691
-1.152	0.555	0.019	0.989	0.532	0.666	0.218	-1.092	-0.64	-1.343	0.027	-0.416	-0.824	1.023	0.455	0.538	1.046	0.81	1.337	-0.047	0.458	0.907	-1.041	-0.399	-0.484	-1.02	-0.801	-2.35	0.069	-0.788	-1.578	1.76	0.812	0.906	1.892	1.282	2.308	-0.056	0.819	1.523	-1.9	-0.775	-0.939	-1.751	-1.458
-0.067	1.3	-0.011	1.073	-0.618	0.387	-1.005	-0.7	-0.329	-0.729	1.203	-0.26	0.612	1.254	0.235	1.314	0.029	0.501	0.698	-1.203	0.253	-0.608	-1.267	-0.235	-1.286	-0.058	-0.382	-1.325	2.103	-0.532	0.991	2.196	0.554	2.378	0.092	0.742	1.354	-2.066	0.26	-1.076	-2.134	-0.575	-2.323	-0.148	-0.56
0.296	1.078	-0.632	0.948	-0.677	0.57	-1.198	-0.355	0.141	-0.421	1.12	-0.705	0.973	0.924	-0.476	1.392	-0.217	0.288	0.41	-1.045	0.809	-0.921	-0.883	0.482	-1.327	0.21	-0.211	-0.684	1.92	-1.424	1.74	1.579	-0.831	2.422	-0.401	0.407	0.576	-2.039	1.249	-1.734	-1.515	0.888	-2.426	0.346	-0.477
-0.176	1.175	-0.494	1.157	-0.416	0.315	-1.022	-0.736	0.247	-0.859	0.972	-0.563	0.522	1.246	-0.363	1.36	0.215	0.114	0.817	-1	0.489	-0.56	-1.191	0.5	-1.378	-0.19	-0.015	-1.471	1.699	-0.977	0.942	2.209	-0.742	2.438	0.345	0.073	1.499	-1.743	0.883	-0.915	-2.128	0.76	-2.393	-0.435	-0.16
-0.685	0.925	0.551	1.329	0.076	0.002	-0.582	-1.043	-0.483	-1.225	0.537	0.347	-0.054	1.2	0.712	1.224	0.701	0.333	1.292	-0.566	-0.318	0.067	-1.319	-0.579	-1.156	-0.651	-0.328	-2.199	0.977	0.593	-0.244	2.225	1.03	2.068	1.315	0.465	2.272	-0.956	-0.591	-0.015	-2.29	-1.086	-2.029	-1.171	-0.577
-0.435	1.111	0.437	1.257	-0.178	-0.063	-0.797	-0.969	-0.322	-1.048	0.777	0.373	0.237	1.316	0.462	1.292	0.51	0.15	1.081	-0.845	-0.269	-0.205	-1.328	-0.456	-1.296	-0.513	-0.136	-1.889	1.465	0.579	0.325	2.295	0.773	2.319	0.9	0.377	1.872	-1.506	-0.592	-0.316	-2.251	-0.972	-2.371	-0.819	-0.289
-0.231	0.44	1.163	1.213	-0.277	-0.378	-1.024	-0.334	-0.75	-0.904	0.38	0.993	0.455	0.428	1.206	1.381	-0.1	0.282	0.905	-0.468	-0.988	-0.532	-0.521	-1.218	-1.404	-0.124	-0.192	-1.498	0.742	1.778	0.88	0.992	2.065	2.407	0.276	0.382	1.677	-0.674	-1.744	-0.908	-0.951	-2.16	-2.457	0.021	-0.405
-1.003	-0.038	0.743	1.096	0.557	0.395	-0.072	-0.58	-1.219	-1.294	-0.368	0.146	-0.595	0.281	1.246	0.726	0.706	0.968	1.359	0.33	-0.234	0.582	-0.364	-1.26	-0.727	-0.729	-1.058	-2.304	-0.536	0.431	-1.092	0.585	2.169	1.078	1.365	1.745	2.393	0.676	-0.292	1.175	-0.658	-2.111	-1.301	-1.289	-1.749
-0.999	0.798	0.324	0.513	-0.773	0.867	0.486	0.061	-1.189	-0.97	0.971	-0.315	-0.913	0.555	0.938	0.041	-0.393	1.32	0.932	-1.05	0.313	0.944	-0.429	-0.96	-0.035	0.547	-1.291	-1.591	1.72	-0.739	-1.767	0.696	1.673	0.029	-0.912	2.301	1.611	-1.87	0.641	1.641	-0.846	-1.663	0.078	1.011	-2.218
-0.88	0.91	0.136	-0.016	-1.03	0.743	0.877	0.119	-0.966	-0.546	1.236	-0.44	-1.106	0.483	0.684	-0.567	-0.728	1.042	0.525	-1.222	0.337	1.163	-0.451	-0.669	0.486	0.678	-1.16	-1.091	2.174	-0.649	-1.954	0.838	1.247	-0.944	-1.272	1.933	1.036	-2.097	0.84	2.086	-0.783	-1.096	0.913	1.143	-2.069
-0.338	1.207	0.3	-0.489	-1.041	0.631	0.757	-0.17	-0.989	0.071	1.403	-0.262	-0.723	0.875	0.81	-0.805	-0.549	1.035	-0.118	-1.425	0.147	0.675	-0.868	-0.846	0.735	0.553	-1.022	0.171	2.482	-0.363	-1.116	1.543	1.584	-1.481	-0.926	1.818	-0.152	-2.447	0.379	1.281	-1.479	-1.498	1.464	0.838	-1.782
-0.465	0.689	0.963	0.47	-1.142	0.218	-0.088	0.42	-1.239	-0.591	1.144	0.444	-0.299	0.149	1.367	0.299	-1.014	0.886	0.571	-1.143	-0.486	0.242	-0.19	-1.419	-0.419	0.975	-0.93	-1.008	2	0.891	-0.406	0.384	2.399	0.606	-1.793	1.595	1.154	-2.006	-0.734	0.466	-0.345	-2.449	-0.616	1.839	-1.565
0.394	0.836	0.872	0.417	-1.194	0	-0.839	0.397	-0.874	-0.012	1.294	0.54	0.746	0.29	1.108	0.728	-1.007	0.592	0.042	-1.244	-0.588	-0.724	-0.258	-1.14	-0.847	1.017	-0.518	-0.039	2.263	1.007	1.449	0.459	1.865	1.456	-1.715	0.976	0.139	-2.298	-1.015	-1.381	-0.52	-1.955	-1.556	1.721	-0.873
0.908	0.574	0.717	0.002	-1.271	-0.172	-0.905	0.703	-0.576	0.631	1.186	0.523	1.077	-0.1	0.837	0.582	-1.245	0.256	-0.58	-1.152	-0.588	-1.184	0.067	-0.804	-0.514	1.258	-0.297	1.119	2.061	0.906	1.974	-0.177	1.421	1.001	-2.248	0.45	-0.963	-2.033	-0.944	-2.04	0.167	-1.423	-1.104	2.215	-0.337
1.202	0.336	0.25	-0.222	-0.862	-0.947	-0.981	0.554	0.632	0.889	0.774	0.735	1.38	-0.14	-0.278	0.475	-0.874	-1.034	-0.892	-0.749	-0.758	-1.391	0.113	0.241	-0.464	0.943	0.939	1.572	1.365	1.416	2.439	-0.238	-0.402	0.783	-1.574	-1.753	-1.546	-1.359	-1.357	-2.412	0.058	0.555	-0.834	1.681	1.697
1.258	0.316	-0.099	-0.71	-0.171	-1.065	-0.529	-0.203	1.148	1.248	0.233	0.606	1.13	0.349	-0.801	-0.114	-0.043	-1.398	-1.224	-0.291	-0.613	-1.083	-0.335	0.764	0.089	-0.051	1.402	2.164	0.517	1.108	1.991	0.709	-1.34	-0.225	-0.09	-2.481	-2.166	-0.341	-1.074	-1.971	-0.539	1.341	0.162	-0.119	2.485
1.034	-0.116	0.784	-0.143	1.03	-0.74	-0.923	-0.897	-0.008	0.742	-0.727	0.925	1.207	0.516	0.56	0.478	1.2	-0.487	-0.755	0.747	-0.909	-1.232	-0.496	-0.472	-0.516	-1.198	0.467	1.326	-1.318	1.666	2.156	0.829	0.892	0.93	2.055	-0.952	-1.326	1.368	-1.536	-2.099	-0.853	-0.917	-0.911	-2.122	0.763
0.878	0	0.918	0.269	0.537	-1.152	-1.083	-0.632	0.187	0.46	-0.422	1.278	1.215	0.406	0.449	0.849	0.721	-0.859	-0.334	0.282	-1.324	-1.187	-0.459	-0.468	-0.851	-0.754	0.813	0.566	-0.614	2.331	2.152	0.789	0.807	1.473	1.391	-1.444	-0.654	0.535	-2.298	-2.235	-0.534	-0.76	-1.453	-1.342	1.475
0.519	-0.339	1.125	0.762	0.183	-0.991	-1.295	0.165	-0.136	-0.145	-0.331	1.324	1.117	-0.323	0.8	1.274	0.001	-0.548	0.171	0.361	-1.314	-1.134	0.351	-0.816	-1.314	-0.037	0.553	-0.196	-0.399	2.425	2.038	-0.565	1.339	2.235	0.018	-0.955	0.232	0.401	-2.444	-2.005	0.53	-1.397	-2.271	-0.007	1.033
1.272	-0.258	0.071	-0.617	0.055	-1.139	-0.651	0.22	1.079	1.187	-0.196	0.776	1.226	-0.277	-0.635	0.011	-0.119	-1.373	-1.188	0.22	-0.774	-1.198	0.306	0.623	-0.027	0.106	1.41	2.036	-0.461	1.3	2.074	-0.572	-1.159	0.112	-0.267	-2.454	-2.028	0.476	-1.363	-2.068	0.699	1.16	-0.137	0.084	2.49
0.985	0.231	0.758	0.167	-0.057	-1.252	-1.185	-0.168	0.484	0.481	0.284	1.258	1.376	0.151	0.168	0.844	0.04	-1.09	-0.533	-0.137	-1.273	-1.381	-0.287	-0.172	-0.865	-0.034	1.083	0.867	0.54	2.18	2.43	0.253	0.393	1.559	0.004	-1.935	-0.94	-0.307	-2.261	-2.415	-0.448	-0.378	-1.424	-0.057	2.025
0.974	-0.501	0.685	0.219	0.475	-1.166	-1.203	-0.028	0.453	0.452	-0.684	1.109	1.384	-0.269	0.176	0.879	0.338	-1.016	-0.467	0.549	-1.187	-1.39	0.287	-0.117	-0.882	-0.349	0.968	0.832	-1.096	2.097	2.437	-0.485	0.287	1.514	0.574	-1.845	-0.766	1.122	-2.028	-2.456	0.567	-0.209	-1.536	-0.555	1.765
0.333	-0.814	0.891	0.881	0.605	-0.725	-1.258	0.222	-0.179	-0.344	-0.915	1.001	0.968	-0.608	0.681	1.345	0.227	-0.366	0.314	0.904	-1.013	-1.011	0.661	-0.681	-1.374	-0.239	0.347	-0.586	-1.722	1.761	1.759	-1.15	1.219	2.402	0.426	-0.598	0.594	1.716	-1.702	-1.711	1.1	-1.286	-2.356	-0.4	0.637
1.279	-0.279	-0.125	-0.768	0.115	-1.03	-0.433	0.31	1.148	1.323	-0.121	0.587	1.107	-0.384	-0.813	-0.175	-0.109	-1.382	-1.261	0.355	-0.57	-1.043	0.392	0.809	0.233	0.215	1.353	2.235	-0.391	0.943	1.85	-0.789	-1.484	-0.497	-0.41	-2.386	-2.242	0.466	-0.956	-1.948	0.367	1.475	0.417	0.409	2.424
-0.148	0.059	-1.251	-0.784	0.691	0.776	0.941	-0.721	0.546	0.362	-0.42	-1.234	-0.657	0.518	-1.118	-1.051	0.924	0.146	-0.416	0.399	1.328	0.716	-0.474	1.204	1.067	-0.879	-0.159	0.761	-0.666	-2.308	-1.066	1.018	-1.988	-1.95	1.645	0.191	-0.836	0.434	2.302	1.162	-0.965	2.011	1.907	-1.534	-0.374
-0.415	0.486	-1.103	-0.439	0.512	1.124	0.906	-0.907	0.005	0.03	0.015	-1.389	-0.805	0.925	-0.682	-0.838	0.931	0.711	0.021	0.052	1.415	0.854	-0.846	0.697	0.861	-0.862	-0.69	-0.026	-0.154	-2.498	-1.453	1.525	-1.306	-1.503	1.498	1.149	-0.1	-0.004	2.546	1.551	-1.478	1.263	1.41	-1.601	-1.214
-0.698	0.164	-1.068	0.122	0.96	0.862	0.513	-1.183	0.257	-0.533	-0.509	-1.225	-0.796	0.813	-0.78	-0.337	1.305	0.429	0.554	0.504	1.194	0.774	-0.854	0.848	0.188	-1.397	-0.346	-0.94	-0.879	-2.186	-1.262	1.503	-1.52	-0.444	2.347	0.844	1.007	0.904	2.079	1.464	-1.4	1.428	0.325	-2.337	-0.764
-1.244	0.286	-0.103	0.864	0.938	0.21	0.371	-1.214	-0.034	-1.361	-0.404	-0.143	-0.985	0.948	-0.037	0.319	1.352	0.081	1.309	0.412	0.332	1.016	-0.919	0.061	-0.321	-1.363	-0.123	-2.386	-0.736	-0.33	-1.796	1.64	-0.197	0.586	2.406	0.092	2.328	0.809	0.404	1.833	-1.679	0.088	-0.544	-2.464	-0.228
-1.061	0.216	-0.665	1.11	0.039	-0.559	-0.073	-0.221	1.261	-1.393	0.041	-0.088	-0.62	0.377	-1.159	0.722	0.253	-1.119	1.368	-0.181	0.062	0.644	-0.308	1.218	-0.779	-0.101	1.173	-2.428	0.014	-0.172	-0.996	0.595	-2.155	1.294	0.481	-1.947	2.458	-0.335	0.114	1.221	-0.505	2.121	-1.492	-0.33	1.951
-0.528	0.239	-1.146	1.208	0.356	0.196	-0.686	-0.526	0.999	-1.112	-0.07	-0.828	0.115	0.537	-1.338	1.209	0.499	-0.513	1.069	0.181	0.894	-0.129	-0.402	1.375	-1.166	-0.584	0.527	-2.065	-0.14	-1.397	0.304	0.742	-2.385	2.08	0.894	-1.004	1.989	0.184	1.526	-0.248	-0.743	2.357	-2.046	-1.098	0.785
-0.423	0.104	-1.209	0.868	0.841	0.487	-0.379	-1.018	0.689	-0.784	-0.468	-1.099	-0.009	0.643	-1.179	0.802	1.146	-0.131	0.847	0.435	1.044	0.08	-0.728	1.166	-0.779	-1.201	0.122	-1.398	-0.65	-1.963	-0.074	1.251	-2.118	1.461	2.063	-0.183	1.3	0.82	1.89	0.104	-1.307	2.118	-1.55	-2.004	0.333
-0.682	0.21	-1.06	1.256	0.28	0.06	-0.545	-0.614	0.995	-1.191	-0.103	-0.725	-0.094	0.476	-1.284	1.144	0.507	-0.583	1.236	0.011	0.696	0.087	-0.549	1.299	-1.115	-0.636	0.586	-2.145	-0.018	-1.236	-0.171	0.989	-2.214	1.944	0.862	-1.145	2.137	0.191	1.347	0.222	-0.877	2.263	-2.052	-0.854	0.994
-0.651	0.79	-0.745	0.752	-0.886	-0.523	-0.077	0.09	1.278	-0.872	1.061	-0.135	-0.348	0.432	-1.266	0.502	-0.625	-1.114	0.913	-1.055	0.135	0.366	-0.458	1.287	-0.504	0.63	1.116	-1.678	1.788	-0.318	-0.59	0.823	-2.234	0.846	-1.12	-2.039	1.71	-1.763	0.185	0.6	-0.766	2.324	-0.945	1.051	2.059
-0.755	0.429	-0.971	0.948	-0.805	-0.258	-0.187	0.425	1.216	-1.032	0.83	-0.434	-0.392	-0.022	-1.396	0.698	-0.774	-0.936	1.091	-0.737	0.449	0.387	0.027	1.374	-0.736	0.793	0.911	-1.846	1.33	-0.883	-0.689	0.122	-2.406	1.312	-1.348	-1.624	1.871	-1.435	0.769	0.625	-0.116	2.482	-1.288	1.331	1.694
-1.263	-0.052	0.038	0.603	-0.551	-1.014	0.655	0.627	0.894	-1.181	0.292	0.656	-1.199	-0.376	-0.608	-0.043	-0.716	-1.218	1.171	-0.319	-0.711	1.219	0.465	0.461	0.022	0.711	1.229	-2.079	0.488	1.209	-2.181	-0.817	-0.783	0.01	-1.37	-2.083	2.129	-0.533	-1.115	2.103	0.833	0.843	0.028	1.342	2.121
-1.076	-0.413	0.534	0.082	0.056	-1.303	1.017	0.285	0.718	-0.731	-0.292	1.138	-1.302	-0.508	-0.137	-0.575	-0.136	-1.278	0.743	0.221	-1.191	1.314	0.395	0.081	0.605	0.15	1.266	-1.189	-0.503	2.082	-2.371	-0.623	-0.221	-1.204	-0.069	-2.149	1.314	0.492	-2.08	2.383	0.684	0.25	1.012	0.191	2.239
-1.27	0.254	-0.094	0.597	-0.526	-0.986	0.68	0.136	1.115	-1.185	0.459	0.557	-1.22	-0.004	-0.742	-0.028	-0.443	-1.293	1.163	-0.553	-0.556	1.19	-0.165	0.765	0.097	0.384	1.353	-1.934	1.017	0.994	-2.206	0.116	-1.205	-0.122	-0.979	-2.304	2.035	-0.743	-1.13	2.178	0.036	1.216	0.033	0.874	2.346
-0.789	-0.928	-0.349	1.183	0.045	-0.504	-0.356	0.856	0.878	-1.206	-0.663	0.128	-0.274	-1.103	-0.788	0.954	-0.494	-0.878	1.274	0.577	-0.064	0.304	1.127	0.768	-0.962	0.493	0.894	-2.259	-0.982	0.213	-0.481	-1.943	-1.358	1.715	-0.772	-1.625	2.292	0.949	-0.156	0.435	2.009	1.35	-1.793	0.804	1.517
-1.131	0.077	-0.571	1.045	0.476	-0.539	0.109	-0.619	1.127	-1.386	-0.285	-0.014	-0.742	0.42	-1.058	0.619	0.593	-1.074	1.356	0.291	0.061	0.809	-0.477	1.073	-0.6	-0.699	1.053	-2.486	-0.342	-0.04	-1.362	0.725	-1.943	1.089	1.137	-1.903	2.374	0.616	0.058	1.412	-0.796	1.912	-1.084	-1.184	1.874
-1.231	-0.087	-0.443	0.945	0.187	-0.833	0.256	-0.163	1.263	-1.39	-0.241	0.225	-0.936	0.065	-1.065	0.448	0.251	-1.326	1.33	0.084	-0.25	0.922	-0.068	1.062	-0.447	-0.242	1.321	-2.452	-0.445	0.428	-1.622	0.295	-1.875	0.81	0.668	-2.241	2.396	0.161	-0.494	1.658	0.027	1.9	-0.718	-0.557	2.315
-0.644	1.038	0.378	0.437	-0.089	-1.215	0.278	-0.922	0.882	-0.625	0.749	1.004	-0.581	1.215	-0.287	0.109	0.517	-1.305	0.724	-0.671	-0.975	0.609	-1.216	0.327	-0.067	-0.529	1.343	-1.192	1.219	1.745	-1.056	2.194	-0.518	0.215	0.839	-2.43	1.141	-1.306	-1.792	0.945	-2.206	0.531	-0.223	-0.805	2.356
-0.699	0.932	0.573	0.134	0.035	-1.28	0.532	-0.967	0.643	-0.654	0.526	1.126	-0.679	1.231	-0.047	-0.224	0.647	-1.219	0.468	-0.58	-1.214	0.819	-1.16	0.03	0.192	-0.665	1.172	-1.178	0.881	2.014	-1	2.26	-0.059	-0.345	1.192	-2.06	0.903	-1.103	-2.019	1.464	-2.061	0.123	0.233	-1.168	2.154
-0.371	1.124	0.524	0.692	-0.002	-1.071	-0.302	-1.137	0.609	-0.665	0.724	1.048	-0.034	1.394	-0.047	0.624	0.684	-1.076	0.683	-0.692	-0.938	0.062	-1.411	0.078	-0.624	-0.735	1.081	-1.162	1.328	1.765	-0.081	2.458	-0.148	1.085	1.275	-1.883	1.219	-1.234	-1.794	0.078	-2.458	0.163	-1.184	-1.333	1.75
-0.979	0.726	0.388	0.433	0.109	-1.201	0.492	-0.944	0.751	-0.878	0.369	0.991	-0.979	0.992	-0.273	-0.045	0.558	-1.281	0.85	-0.378	-0.992	0.899	-1.087	0.2	0.024	-0.711	1.209	-1.513	0.717	1.825	-1.66	1.828	-0.363	-0.063	1.056	-2.243	1.655	-0.376	-1.679	1.669	-1.874	0.36	0.04	-1.093	2.246
-0.868	0.939	0.276	0.03	-0.557	-1.158	0.709	-0.494	0.944	-0.625	0.921	0.954	-1.042	0.821	-0.413	-0.461	-0.095	-1.301	0.492	-0.985	-0.872	0.962	-0.89	0.444	0.37	-0.038	1.335	-0.942	1.814	1.48	-1.618	1.684	-0.788	-0.784	-0.037	-2.344	1.204	-1.482	-1.665	1.688	-1.517	0.802	0.756	-0.196	2.369
-1.132	0.28	0.511	0.032	-0.546	-1.17	1.114	0.2	0.674	-0.726	0.485	1.089	-1.404	0.045	-0.131	-0.656	-0.473	-1.197	0.719	-0.573	-1.006	1.397	-0.079	0.098	0.703	0.44	1.183	-1.354	0.776	1.907	-2.505	0.147	-0.134	-1.16	-0.733	-2.081	1.243	-0.903	-1.882	2.515	-0.08	0.151	1.23	0.949	2.004
-0.094	0.69	1.073	-0.739	-1.043	-0.15	0.799	0.331	-0.933	0.423	1.074	0.742	-0.611	0.229	1.283	-0.974	-0.873	0.48	-0.419	-1.098	-0.768	0.596	-0.271	-1.24	0.905	0.889	-0.522	0.921	1.887	1.307	-1.113	0.421	2.279	-1.634	-1.563	0.975	-0.84	-1.892	-1.43	1.045	-0.319	-2.219	1.703	1.516	-0.888
0.946	0.473	-0.777	-0.049	0.27	1.258	-0.92	-0.735	-0.496	0.627	0.113	-1.295	1.154	0.771	-0.174	0.554	0.572	1.12	-0.647	-0.052	1.248	-1.205	-0.699	0.153	-0.537	-0.689	-1.087	1.166	0.245	-2.228	2.058	1.437	-0.324	0.957	1.002	2.06	-1.117	-0.239	2.216	-2.106	-1.287	0.315	-0.904	-1.175	-2.005
1.076	0.648	-0.246	-0.375	-0.156	1.221	-0.705	-0.506	-0.938	0.88	0.51	-0.926	1.158	0.708	0.475	0.222	0.218	1.374	-0.931	-0.513	0.931	-1.106	-0.739	-0.434	-0.231	-0.218	-1.33	1.589	0.903	-1.753	1.928	1.306	0.783	0.428	0.309	2.427	-1.654	-0.826	1.662	-1.968	-1.302	-0.776	-0.313	-0.356	-2.433
1.144	0.388	-0.402	-0.513	0.479	1.055	-0.598	-0.911	-0.664	1.04	-0.087	-0.915	1.119	0.816	0.157	0.085	0.854	1.06	-1.041	0.04	0.939	-1.062	-0.85	-0.136	-0.062	-0.876	-1.132	1.802	-0.055	-1.621	2.028	1.392	0.258	0.057	1.611	1.845	-1.922	0.108	1.59	-1.955	-1.366	-0.169	-0.089	-1.586	-1.876
1.03	-0.574	-0.504	0.009	0.395	1.236	-1.03	0.226	-0.731	0.624	-0.665	-1.073	1.317	-0.407	0.108	0.64	0.102	1.24	-0.619	0.648	1.096	-1.275	0.539	-0.119	-0.666	-0.106	-1.25	1.2	-1.26	-1.712	2.281	-0.808	0.18	1.153	0.18	2.153	-1.188	1.098	1.944	-2.307	0.914	-0.382	-1.16	-0.236	-2.185
0.824	-0.878	-0.426	0.419	1.146	0.363	-1.299	-0.281	0.039	0.226	-1.275	-0.536	1.316	-0.387	-0.283	1.053	0.881	0.17	-0.271	1.281	0.506	-1.364	0.356	0.315	-1.092	-0.888	-0.231	0.527	-2.304	-0.773	2.388	-0.568	-0.475	1.943	1.562	0.399	-0.445	2.274	0.916	-2.398	0.637	0.565	-1.883	-1.57	-0.573
0.64	-0.87	-0.698	0.591	1.072	0.453	-1.191	-0.21	0.264	0.024	-1.257	-0.659	1.198	-0.392	-0.647	1.162	0.812	0.116	-0.045	1.209	0.751	-1.165	0.424	0.541	-1.082	-0.816	-0.055	-0.069	-2.199	-1.132	2.032	-0.632	-1.312	2.064	1.466	0.032	-0.116	2.136	1.348	-2.08	0.74	1.089	-1.922	-1.491	-0.072
0.501	0.243	-1.156	0.757	0.122	1.059	-1.262	-0.295	0.154	-0.157	0.132	-1.386	1.106	0.342	-0.795	1.271	0.283	0.592	0.152	-0.037	1.411	-1.132	-0.3	0.848	-1.249	-0.256	-0.536	-0.22	0.161	-2.399	1.858	0.456	-1.477	2.194	0.396	1.028	0.39	-0.176	2.452	-2.027	-0.602	1.325	-2.186	-0.398	-1.064
-1.105	0.561	0.345	0.47	0.181	-1.22	0.651	-0.721	0.846	-0.985	0.325	0.982	-1.088	0.748	-0.34	-0.113	0.552	-1.353	0.991	-0.216	-0.956	1.098	-0.802	0.32	0.139	-0.556	1.278	-1.828	0.383	1.769	-2.001	1.327	-0.509	-0.142	1	-2.36	1.836	-0.33	-1.643	1.92	-1.481	0.576	0.175	-0.95	2.236
-1.126	0.498	-0.411	0.765	-0.596	-0.843	0.315	-0.013	1.242	-1.2	0.7	0.271	-0.941	0.225	-1.053	0.263	-0.416	-1.348	1.176	-0.718	-0.249	0.877	-0.353	1.056	-0.283	0.299	1.296	-2.033	1.234	0.585	-1.547	0.613	-1.866	0.54	-0.684	-2.405	2.083	-1.203	-0.334	1.575	-0.596	1.849	-0.511	0.899	2.199
-0.178	0.188	-1.228	0.801	-0.939	0.369	-0.525	0.784	0.898	-0.568	0.688	-0.971	0.257	-0.325	-1.338	0.864	-1.068	-0.345	0.658	-0.7	1.044	-0.147	0.449	1.354	-0.831	1.034	0.347	-1.201	1.127	-1.801	0.301	-0.586	-2.409	1.528	-1.845	-0.593	1.039	-1.346	1.794	-0.48	0.678	2.32	-1.419	1.894	0.599
-0.638	0.724	-0.822	0.054	-1.295	-0.114	0.602	0.548	0.956	-0.383	1.273	-0.443	-0.813	0.093	-1.113	-0.393	-1.165	-0.664	0.494	-1.284	0.462	0.843	-0.101	1.098	0.294	1.129	0.707	-0.701	2.212	-0.825	-1.535	0.215	-1.869	-0.675	-2.065	-1.241	0.859	-2.211	0.71	1.49	-0.128	1.986	0.52	2.031	1.192
-0.634	0.465	-0.986	-0.558	-0.8	0.801	1.178	0.453	0.272	-0.035	0.852	-1.088	-1.161	0.034	-0.767	-1.086	-0.743	0.355	0.035	-0.739	1.18	1.095	0.06	0.849	1.117	0.817	-0.323	-0.192	1.473	-1.902	-1.941	-0.01	-1.462	-1.905	-1.507	0.452	0.012	-1.494	1.944	2.021	-0.044	1.416	2.041	1.3	-0.655
-1.082	0.46	-0.514	-0.017	-0.561	1.166	1.123	0.097	-0.603	-0.63	0.682	-1.015	-1.406	0.185	0.045	-0.74	-0.441	1.12	0.705	-0.618	1.091	1.4	-0.224	-0.041	0.726	0.406	-1.082	-1.14	1.15	-1.826	-2.551	0.396	0.122	-1.324	-0.763	1.944	1.304	-1.121	1.833	2.443	-0.317	-0.193	1.211	0.665	-1.996
-1.205	-0.356	0.165	0.762	0.11	1.023	0.405	0.32	-1.195	-1.239	-0.283	-0.538	-1.039	-0.369	0.852	0.179	-0.033	1.39	1.243	0.255	0.536	1.031	0.439	-0.846	-0.266	0.168	-1.411	-2.165	-0.637	-0.951	-1.831	-0.775	1.475	0.479	-0.109	2.436	2.26	0.313	1.026	1.792	0.862	-1.478	-0.444	0.169	-2.491
-0.214	-1.052	0.705	0.877	0.837	0.395	-0.646	0.179	-1.088	-0.628	-1.219	0.167	0.219	-0.77	1.16	0.907	0.418	0.966	0.763	1.151	-0.222	-0.252	0.764	-1.137	-0.97	-0.428	-0.907	-1.047	-2.184	0.345	0.379	-1.291	2.037	1.554	0.836	1.724	1.202	2.092	-0.401	-0.49	1.29	-2.022	-1.637	-0.659	-1.711
-0.63	-1.049	0.402	1.223	0.211	0.391	-0.559	0.781	-0.844	-1.136	-0.808	-0.029	-0.044	-1.176	0.774	1.113	-0.371	0.764	1.199	0.765	-0.022	0.058	1.141	-0.776	-1.109	0.313	-0.831	-2.084	-1.38	0.072	-0.125	-2.074	1.434	1.98	-0.591	1.385	2.067	1.34	-0.122	0.007	2.16	-1.24	-1.926	0.681	-1.41
-0.879	-0.945	0.116	1.202	-0.193	0.334	-0.344	1.181	-0.445	-1.336	-0.438	-0.108	-0.328	-1.334	0.325	0.953	-0.831	0.513	1.315	0.47	0.11	0.33	1.359	-0.411	-0.983	0.875	-0.417	-2.344	-0.863	-0.139	-0.533	-2.421	0.552	1.707	-1.462	0.972	2.333	0.767	0.227	0.532	2.283	-0.849	-1.647	1.596	-0.776
-0.54	-1.151	0.078	1.248	0.062	-0.268	-0.703	1.044	0.211	-1.08	-0.766	0.306	0.066	-1.412	-0.151	1.206	-0.63	-0.366	1.148	0.736	-0.137	-0.083	1.359	0.129	-1.246	0.606	0.269	-1.96	-1.371	0.491	0.098	-2.422	-0.326	2.128	-0.995	-0.68	2.05	1.346	-0.235	-0.134	2.472	0.252	-2.194	1.077	0.449
-0.987	-0.693	-0.458	1.197	-0.467	0.05	-0.209	1.19	0.401	-1.336	-0.125	-0.383	-0.525	-1.18	-0.49	0.86	-1.061	-0.168	1.405	0.202	0.257	0.481	1.153	0.6	-0.885	1.082	0.166	-2.389	-0.243	-0.662	-0.939	-2.11	-0.774	1.429	-2.001	-0.26	2.485	0.175	0.487	0.888	2.074	1.052	-1.475	2.035	0.174
-1.115	-0.385	-0.402	1.05	-0.169	-0.769	0.109	0.559	1.137	-1.337	-0.154	0.212	-0.765	-0.573	-0.972	0.608	-0.47	-1.239	1.382	0.148	-0.219	0.77	0.672	0.939	-0.553	0.389	1.197	-2.385	-0.321	0.413	-1.366	-0.964	-1.741	0.992	-0.858	-2.1	2.417	0.326	-0.408	1.276	1.169	1.771	-1.039	0.635	2.147
-0.696	-0.065	-1.112	1.264	-0.02	-0.022	-0.593	0.048	1.104	-1.273	-0.032	-0.677	-0.046	-0.093	-1.423	1.167	-0.075	-0.731	1.219	0.02	0.688	0.052	0.062	1.368	-1.179	0.03	0.703	-2.221	-0.072	-1.169	-0.056	-0.105	-2.531	2.121	-0.007	-1.357	2.095	0.137	1.301	0.137	0.041	2.474	-2.016	0.093	1.355
-0.944	-0.384	-0.734	1.038	0.484	-0.529	-0.146	-0.13	1.268	-1.278	-0.586	-0.113	-0.507	-0.143	-1.268	0.735	0.396	-1.123	1.214	0.509	0.119	0.516	0.067	1.249	-0.803	-0.313	1.146	-2.258	-0.932	-0.308	-0.864	-0.295	-2.2	1.386	0.773	-1.889	2.207	0.951	0.189	0.974	0.192	2.169	-1.322	-0.619	2.028
-1.208	-0.132	-0.434	0.858	0.579	-0.712	0.36	-0.471	1.124	-1.285	-0.518	0.146	-0.992	0.264	-0.971	0.335	0.652	-1.181	1.284	0.432	-0.171	0.992	-0.243	0.984	-0.308	-0.645	1.139	-2.328	-0.886	0.335	-1.723	0.497	-1.713	0.559	1.262	-2.008	2.323	0.776	-0.283	1.785	-0.411	1.705	-0.64	-1.181	2.018
-0.943	-0.246	-0.823	1.203	0.223	-0.44	-0.26	0.074	1.272	-1.348	-0.242	-0.272	-0.436	-0.216	-1.273	0.947	0.112	-1.078	1.319	0.329	0.241	0.418	0.165	1.319	-0.902	-0.027	1.086	-2.385	-0.498	-0.549	-0.707	-0.4	-2.302	1.71	-0.054	-1.833	2.352	0.567	0.456	0.715	0.359	2.328	-1.683	-0.094	1.878
-1.07	0.255	-0.683	1.003	0.787	-0.053	0.056	-1.041	0.745	-1.319	-0.331	-0.42	-0.704	0.809	-0.878	0.614	1.174	-0.505	1.283	0.311	0.405	0.687	-0.804	0.895	-0.586	-1.155	0.524	-2.311	-0.629	-0.725	-1.227	1.522	-1.451	1.019	2.083	-0.866	2.297	0.543	0.688	1.313	-1.465	1.512	-1.066	-2.057	0.821
0.569	0.151	-1.137	0.6	0.334	1.104	-1.158	-0.536	0.02	-0.009	-0.09	-1.409	1.073	0.386	-0.734	1.103	0.537	0.666	0.041	0.073	1.414	-1.067	-0.476	0.728	-1.114	-0.55	-0.694	0.061	-0.212	-2.465	1.953	0.587	-1.353	1.875	1.083	1.224	-0.014	0.283	2.515	-1.944	-0.679	1.363	-1.957	-0.94	-1.256
-0.072	0.937	-0.869	0.805	0.126	1.001	-0.709	-1.069	-0.12	-0.587	0.518	-1.15	0.473	1.245	-0.493	0.961	0.727	0.718	0.552	-0.491	1.188	-0.401	-1.258	0.484	-0.942	-0.757	-0.718	-1.141	0.957	-1.999	0.642	2.223	-0.878	1.701	1.484	1.169	1.052	-1.039	1.975	-0.607	-2.283	0.847	-1.704	-1.326	-1.145
-1.014	0.712	-0.37	1.144	0.149	-0.585	-0.115	-0.827	0.958	-1.351	0.35	0.113	-0.56	1.01	-0.805	0.767	0.605	-0.977	1.393	-0.336	-0.136	0.559	-0.969	0.825	-0.775	-0.581	0.987	-2.399	0.539	0.214	-1.023	1.653	-1.525	1.394	1.184	-1.703	2.407	-0.551	-0.146	0.978	-1.723	1.457	-1.39	-1.181	1.695
-1.069	0.029	0.702	-0.092	0.028	-1.303	1.142	-0.099	0.576	-0.63	0.049	1.229	-1.388	-0.002	0.088	-0.776	0.017	-1.203	0.595	0.033	-1.264	1.382	-0.132	-0.074	0.775	-0.064	1.165	-1.104	0.143	2.194	-2.458	0.042	0.257	-1.354	0.072	-2.098	1.146	0.064	-2.164	2.397	-0.217	-0.221	1.415	-0.004	2.091
0.88	-0.657	0.644	-1.173	0.045	0.452	0.305	0.567	-1.142	1.291	-0.528	0.097	0.371	-0.717	1.121	-0.91	-0.295	0.976	-1.301	0.372	-0.135	-0.339	0.749	-1.172	0.917	0.312	-0.993	2.31	-0.859	0.152	0.619	-1.28	1.988	-1.64	-0.488	1.806	-2.295	0.737	-0.139	-0.681	1.442	-1.976	1.657	0.554	-1.724
0.162	-1.027	0.734	-1.156	0.296	-0.531	1.018	0.76	-0.269	0.839	-0.829	0.81	-0.529	-1.103	0.557	-1.378	-0.268	-0.165	-0.808	0.838	-0.832	0.56	1.126	-0.672	1.371	0.304	0.146	1.365	-1.454	1.566	-0.883	-2.038	1.101	-2.406	-0.564	-0.33	-1.417	1.409	-1.518	0.951	1.982	-1.164	2.335	0.596	0.499
-0.885	-0.544	-0.775	1.089	0.481	-0.457	-0.197	0.086	1.281	-1.277	-0.589	-0.172	-0.394	-0.431	-1.279	0.834	0.234	-1.063	1.219	0.678	0.207	0.468	0.371	1.33	-0.834	-0.208	1.093	-2.18	-1.188	-0.457	-0.78	-0.722	-2.267	1.519	0.352	-1.864	2.159	1.211	0.248	0.735	0.687	2.303	-1.468	-0.395	1.922
0.035	-0.723	-1.053	0.723	1.066	0.09	-0.733	-0.338	0.997	-0.418	-1.141	-0.68	0.494	-0.226	-1.296	0.914	0.881	-0.564	0.451	1.129	0.743	-0.416	0.236	1.339	-0.966	-0.867	0.54	-0.843	-1.917	-1.312	0.833	-0.452	-2.33	1.598	1.557	-1.069	0.807	2.017	1.254	-0.761	0.339	2.332	-1.692	-1.556	1.043
0.618	-0.298	-1.092	0.508	0.872	0.818	-1.068	-0.615	0.335	0.071	-0.764	-1.158	1.101	0.19	-0.895	1.023	0.907	0.33	-0.056	0.734	1.225	-1.005	-0.245	0.944	-0.997	-0.917	-0.302	0.084	-1.252	-2.127	1.926	0.399	-1.602	1.796	1.618	0.476	-0.206	1.358	2.115	-1.886	-0.501	1.579	-1.851	-1.526	-0.585
0.787	-0.14	-0.994	0.335	0.784	1	-1.174	-0.555	0.001	0.248	-0.533	-1.203	1.241	0.283	-0.668	0.915	0.88	0.636	-0.3	0.618	1.249	-1.261	-0.207	0.612	-0.963	-0.829	-0.608	0.492	-1.096	-2.15	2.107	0.473	-1.221	1.743	1.417	1.117	-0.406	0.977	2.252	-2.179	-0.465	1.037	-1.635	-1.517	-1.053
0.932	0.009	-0.892	-0.089	0.942	0.891	-0.89	-0.934	-0.003	0.603	-0.558	-1.132	1.153	0.575	-0.552	0.493	1.189	0.555	-0.676	0.596	1.127	-1.174	-0.557	0.508	-0.509	-1.202	-0.518	1.094	-1.082	-2.024	2.068	1.131	-0.943	0.997	2.062	0.925	-1.121	1.01	2.029	-2.057	-1.006	0.826	-0.871	-2.156	-0.804
1.218	0.107	-0.369	-0.437	0.694	0.98	-0.814	-0.761	-0.64	1.039	-0.339	-0.871	1.252	0.548	0.152	0.231	0.928	0.994	-1.055	0.382	0.861	-1.283	-0.56	-0.146	-0.263	-0.864	-1.06	1.941	-0.674	-1.323	2.211	0.946	0.347	0.428	1.67	1.731	-1.9	0.655	1.488	-2.299	-1.06	-0.293	-0.303	-1.632	-1.88
1.022	0.329	-0.674	-0.579	0.833	0.766	-0.517	-1.202	-0.136	0.993	-0.326	-0.91	0.928	0.948	-0.365	-0.052	1.251	0.566	-1.051	0.311	0.876	-1.037	-0.978	0.307	0.042	-1.298	-0.576	1.778	-0.577	-1.602	1.723	1.679	-0.618	-0.015	2.228	1.045	-1.808	0.682	1.57	-1.713	-1.643	0.654	0.212	-2.276	-0.948
1.038	0.507	0.533	-1.094	-0.115	0.687	0.035	-0.35	-1.216	1.334	0.47	-0.101	0.618	0.495	1.105	-0.692	0.101	1.217	-1.373	-0.305	0.08	-0.642	-0.523	-1.116	0.707	-0.138	-1.175	2.45	0.66	-0.203	1.092	0.949	2.019	-1.235	0.113	2.196	-2.404	-0.666	0.096	-1.057	-0.873	-2.045	1.201	-0.283	-2.074
-0.768	-0.516	-0.934	1.105	0.576	-0.342	-0.313	-0.117	1.232	-1.207	-0.657	-0.386	-0.242	-0.321	-1.389	0.91	0.403	-0.994	1.174	0.671	0.35	0.323	0.194	1.352	-0.903	-0.426	0.963	-2.137	-1.149	-0.616	-0.445	-0.525	-2.358	1.622	0.791	-1.741	2.094	1.275	0.574	0.466	0.415	2.449	-1.656	-0.671	1.796
0.999	0.084	-0.766	0.043	0.534	1.14	-1.077	-0.597	-0.358	0.605	-0.266	-1.219	1.274	0.431	-0.225	0.698	0.742	0.932	-0.62	0.27	1.215	-1.339	-0.445	0.277	-0.701	-0.684	-0.94	1.004	-0.498	-2.189	2.402	0.707	-0.378	1.291	1.2	1.74	-1.11	0.526	2.129	-2.339	-0.764	0.419	-1.165	-1.221	-1.759
1.147	0.483	0.395	-0.815	-0.518	0.843	-0.242	-0.01	-1.283	1.316	0.585	-0.289	0.864	0.309	1.019	-0.344	-0.346	1.335	-1.182	-0.644	0.256	-0.816	-0.254	-1.077	0.373	0.245	-1.35	2.212	1.12	-0.348	1.423	0.717	1.848	-0.678	-0.428	2.316	-2.191	-1.15	0.519	-1.646	-0.518	-1.879	0.668	0.365	-2.351
0.339	1.117	0.56	-0.006	-1.082	0.666	-0.254	-0.058	-1.24	0.3	1.353	-0.087	0.358	0.747	1.151	0.076	-0.667	1.212	-0.086	-1.369	0.045	-0.289	-0.753	-1.169	-0.174	0.634	-1.185	0.419	2.443	-0.216	0.493	1.389	1.997	0.111	-1.215	2.17	-0.16	-2.481	0.06	-0.686	-1.331	-1.948	-0.363	1.249	-2.031
0.504	0.798	-0.87	-0.409	0.414	1.157	-0.029	-1.238	-0.244	0.624	0.232	-1.242	0.33	1.267	-0.4	-0.232	1.047	0.89	-0.529	-0.27	1.299	-0.343	-1.304	0.361	0.308	-1.032	-0.808	1.071	0.45	-2.199	0.584	2.299	-0.707	-0.563	1.863	1.502	-0.921	-0.425	2.287	-0.677	-2.301	0.607	0.349	-1.824	-1.59
0.893	0.911	0.113	-1.185	0.151	0.542	0.267	-1.082	-0.625	1.291	0.491	-0.322	0.387	1.227	0.528	-0.923	0.771	0.792	-1.314	-0.495	0.245	-0.377	-1.278	-0.432	0.877	-0.763	-0.738	2.261	0.917	-0.481	0.791	2.146	0.948	-1.572	1.412	1.292	-2.371	-0.805	0.356	-0.643	-2.266	-0.851	1.593	-1.358	-1.338
0.367	0.57	1.121	-1.204	-0.358	-0.166	0.866	-0.193	-0.941	1.011	0.501	0.843	-0.313	0.589	1.279	-1.283	-0.057	0.485	-0.978	-0.618	-0.795	0.342	-0.486	-1.289	1.292	0.117	-0.49	1.805	0.753	1.548	-0.64	0.995	2.125	-2.352	-0.119	0.807	-1.794	-1.084	-1.401	0.599	-0.834	-2.271	2.313	0.242	-0.843
-0.272	0.588	1.078	-0.771	-0.937	-0.403	1.06	0.341	-0.686	0.309	0.965	0.927	-0.817	0.151	1.1	-1.134	-0.808	0.174	-0.323	-0.973	-0.933	0.849	-0.172	-1.102	1.154	0.816	-0.191	0.475	1.68	1.683	-1.456	0.219	2.01	-1.964	-1.348	0.319	-0.598	-1.653	-1.672	1.481	-0.325	-1.943	2.023	1.448	-0.369
0.863	0.795	-0.577	-1.247	0.106	-0.288	0.332	-0.884	0.857	1.301	0.471	-0.145	0.311	1.044	-0.938	-1.019	0.642	-0.68	-1.338	-0.447	0.128	-0.336	-1.089	0.865	0.957	-0.579	0.752	2.375	0.74	-0.361	0.712	1.749	-1.634	-1.79	1.161	-1.203	-2.35	-0.745	0.351	-0.626	-1.899	1.578	1.802	-1.048	1.286
0.657	0.701	-0.834	-1.264	0.243	0.219	0.566	-0.958	0.589	1.192	0.285	-0.676	0.045	1.032	-0.898	-1.198	0.745	-0.284	-1.199	-0.295	0.687	-0.05	-1.022	0.907	1.115	-0.779	0.201	2.11	0.516	-1.223	0.124	1.891	-1.568	-2.04	1.352	-0.532	-2.035	-0.438	1.38	-0.03	-1.871	1.606	1.966	-1.414	0.4
0.753	0.153	-1.013	-1.215	0.261	-0.134	0.463	-0.46	1.108	1.255	-0.059	-0.573	0.166	0.347	-1.335	-1.059	0.415	-0.81	-1.23	0.073	0.547	-0.184	-0.423	1.329	1.054	-0.46	0.752	2.263	-0.091	-1.052	0.251	0.617	-2.361	-1.934	0.815	-1.326	-2.185	0.122	1.013	-0.278	-0.673	2.381	1.88	-0.683	1.437
0.503	0.657	-0.999	-1.277	-0.15	0.116	0.783	-0.461	0.888	1.132	0.539	-0.697	-0.18	0.693	-1.196	-1.297	0.208	-0.493	-1.115	-0.491	0.714	0.176	-0.684	1.167	1.305	-0.155	0.517	1.954	1	-1.124	-0.304	1.305	-2.111	-2.279	0.381	-0.881	-1.966	-0.883	1.238	0.297	-1.388	2.038	2.278	-0.525	0.828
0.274	0.528	-1.158	-1.089	0.318	0.612	0.804	-0.865	0.493	0.846	0.099	-1.137	-0.325	0.886	-1.06	-1.173	0.767	0.107	-0.891	-0.162	1.04	0.342	-0.896	1.005	1.177	-0.741	-0.081	1.516	0.251	-1.992	-0.639	1.636	-1.745	-2.059	1.324	0.224	-1.452	-0.31	1.909	0.615	-1.485	1.872	2.044	-1.37	-0.143
0.535	0.298	-1.165	-1.015	0.659	0.455	0.514	-0.952	0.68	1	-0.226	-1.026	0.021	0.793	-1.178	-0.938	1.015	-0.143	-0.963	0.231	1.001	0.013	-0.75	1.147	0.949	-1.052	0.128	1.79	-0.384	-1.726	-0.131	1.321	-2.111	-1.822	1.711	-0.218	-1.737	0.461	1.753	0.122	-1.337	2.047	1.696	-1.783	0.327
0.795	-0.18	-0.97	-1	0.733	-0.135	0.248	-0.498	1.143	1.191	-0.524	-0.498	0.312	0.191	-1.327	-0.789	0.78	-0.783	-1.086	0.611	0.536	-0.335	-0.187	1.367	0.809	-0.74	0.796	2.065	-1	-0.928	0.565	0.316	-2.376	-1.356	1.482	-1.415	-2.125	0.877	0.867	-0.634	-0.362	2.384	1.384	-1.442	1.377
0.718	0.135	-1.067	-1.217	0.289	-0.011	0.562	-0.366	1.102	1.246	-0.08	-0.672	0.116	0.336	-1.337	-1.115	0.473	-0.706	-1.178	0.071	0.68	-0.064	-0.244	1.41	1.144	-0.421	0.681	2.137	-0.214	-1.218	0.186	0.638	-2.399	-2.033	0.751	-1.252	-2.08	0.226	1.272	-0.319	-0.559	2.427	1.961	-0.977	1.114
0.371	-0.547	-1.15	-0.561	1.192	0.058	0.231	-0.653	1.09	0.63	-1.085	-0.745	0.068	0.051	-1.429	-0.466	1.183	-0.652	-0.572	1.072	0.764	-0.121	-0.121	1.419	0.56	-1.117	0.637	1.145	-1.847	-1.338	0.125	0.055	-2.47	-0.978	2.056	-1.064	-1.13	1.858	1.228	-0.172	-0.15	2.474	0.911	-1.956	1.176
0.759	0.801	-0.637	-1.207	0.318	0.19	0.516	-1.094	0.507	1.262	0.342	-0.429	0.18	1.171	-0.765	-1.053	0.901	-0.188	-1.215	-0.298	0.548	-0.142	-1.189	0.723	1.128	-0.868	0.251	2.212	0.559	-0.88	0.194	2.11	-1.353	-1.934	1.553	-0.302	-2.217	-0.534	0.917	-0.321	-2.173	1.146	1.906	-1.574	0.331
0.201	0.198	-1.272	-0.965	0.579	0.634	0.777	-0.749	0.635	0.709	-0.271	-1.22	-0.32	0.65	-1.177	-1.068	0.89	-0.003	-0.751	0.209	1.198	0.37	-0.581	1.204	1.092	-0.829	-0.009	1.245	-0.416	-2.195	-0.692	1.033	-2.1	-1.989	1.476	0.011	-1.249	0.391	2.132	0.66	-1.145	2.085	1.992	-1.408	0.075
0.116	0.365	-1.17	-0.542	0.777	0.845	0.378	-1.189	0.374	0.402	-0.298	-1.246	-0.195	0.982	-0.951	-0.524	1.271	0.34	-0.5	0.184	1.255	0.111	-1.022	0.999	0.592	-1.229	-0.28	0.747	-0.458	-2.256	-0.236	1.729	-1.781	-1.025	2.208	0.536	-0.775	0.525	2.29	0.329	-1.761	1.756	1.074	-2.132	-0.662
-0.421	0.534	-1.069	-0.211	0.509	1.177	0.663	-1.093	-0.08	-0.139	-0.023	-1.416	-0.649	1.02	-0.599	-0.506	0.992	0.797	0.124	-0.04	1.439	0.695	-1.017	0.619	0.546	-1.051	-0.772	-0.27	0.088	-2.504	-1.219	1.815	-1.098	-1.024	1.775	1.296	0.115	0.034	2.477	1.356	-1.712	1.048	0.971	-1.881	-1.287
-0.853	0.231	-0.921	0.724	0.934	0.477	0.086	-1.176	0.497	-0.982	-0.5	-0.874	-0.638	0.926	-0.853	0.355	1.337	0.057	0.997	0.427	0.852	0.594	-0.885	0.889	-0.425	-1.331	0.054	-1.71	-0.778	-1.662	-1.006	1.665	-1.546	0.767	2.293	0.034	1.832	0.801	1.439	1.056	-1.628	1.505	-0.838	-2.327	0.104
-0.221	-1.257	-0.025	-0.647	0.812	-0.772	0.88	0.462	0.836	0.29	-1.294	0.473	-0.699	-1.07	-0.524	-0.93	0.239	-1.048	-0.31	1.296	-0.389	0.701	1.113	0.577	0.975	-0.243	1.002	0.307	-2.316	0.898	-1.145	-1.967	-0.937	-1.567	0.407	-1.896	-0.375	2.275	-0.92	1.162	1.988	0.922	1.592	-0.428	1.84
0.334	-1.235	0.17	-0.373	0.381	-1.139	0.089	0.826	0.969	0.444	-1.001	0.829	0.196	-1.327	-0.501	-0.348	-0.325	-1.328	-0.347	1.035	-0.828	-0.071	1.333	0.504	0.248	0.22	1.322	0.812	-1.891	1.406	0.206	-2.255	-0.928	-0.714	-0.492	-2.347	-0.634	1.883	-1.403	-0.151	2.329	0.939	0.36	0.491	2.334
0.013	-1.234	0.14	-0.656	0.555	-0.978	0.699	0.728	0.769	0.46	-1.095	0.678	-0.434	-1.229	-0.423	-0.819	-0.09	-1.147	-0.397	1.15	-0.722	0.4	1.281	0.401	0.924	0.097	1.049	0.821	-1.925	1.201	-0.788	-2.268	-0.622	-1.55	-0.303	-1.872	-0.896	1.994	-1.138	0.622	2.235	0.717	1.656	0.152	1.878
0.276	-1.252	-0.007	-0.324	0.596	-1.076	0.225	0.704	1.046	0.414	-1.146	0.665	0.144	-1.208	-0.684	-0.209	-0.023	-1.353	-0.376	1.159	-0.687	0.047	1.267	0.648	0.402	0.062	1.322	0.414	-2.135	1.239	0.073	-2.163	-1.18	-0.534	-0.197	-2.364	-0.847	2.038	-1.142	-0.108	2.258	1.185	0.581	0.086	2.35
0.543	-1.143	0.222	-0.103	0.443	-1.212	-0.329	0.744	1.018	0.476	-0.998	0.91	0.568	-1.16	-0.485	0.206	-0.159	-1.362	-0.37	1.012	-0.925	-0.492	1.203	0.525	-0.125	0.205	1.403	0.808	-1.686	1.607	0.767	-2.12	-0.937	0.17	-0.393	-2.465	-0.866	1.674	-1.587	-0.804	2.133	0.818	-0.338	0.289	2.498
0.828	-0.992	-0.061	-0.664	0.294	-1.013	-0.146	0.69	1.104	0.94	-0.783	0.604	0.614	-1.093	-0.717	-0.33	-0.243	-1.328	-0.916	0.792	-0.574	-0.599	1.092	0.713	0.333	0.216	1.374	1.77	-1.354	1.082	1.096	-1.918	-1.297	-0.637	-0.317	-2.337	-1.67	1.371	-1.164	-1.246	1.858	1.235	0.645	0.379	2.41
0.589	-1.126	-0.086	-0.756	0.447	-0.92	0.135	0.685	1.07	0.788	-1.029	0.585	0.31	-1.102	-0.723	-0.499	-0.112	-1.251	-0.932	0.968	-0.479	-0.291	1.119	0.715	0.549	0.172	1.303	1.492	-1.824	0.851	0.636	-1.862	-1.437	-0.81	-0.27	-2.224	-1.655	1.626	-0.926	-0.499	2.011	1.265	0.91	0.304	2.322
0.375	-1.191	-0.295	-0.274	0.836	-0.916	-0.134	0.361	1.266	0.436	-1.264	0.424	0.262	-0.986	-0.975	-0.066	0.307	-1.339	-0.456	1.279	-0.376	-0.387	0.965	0.997	0.13	-0.286	1.4	0.851	-2.237	0.685	0.511	-1.717	-1.737	-0.063	0.514	-2.397	-0.804	2.186	-0.834	-0.609	1.749	1.755	0.195	-0.51	2.396
0.393	-0.343	-1.218	-0.66	1.072	0.182	0.184	-0.799	0.978	0.647	-0.94	-0.907	0.077	0.289	-1.402	-0.589	1.117	-0.503	-0.672	0.893	0.828	-0.125	-0.289	1.375	0.464	-1.235	0.472	1.197	-1.678	-1.495	0.319	0.574	-2.438	-0.916	2.13	-0.749	-1.108	1.601	1.56	-0.222	-0.339	2.474	0.928	-2.122	0.785
0.206	-0.868	-0.918	-0.566	1.128	-0.306	0.337	-0.245	1.216	0.455	-1.252	-0.405	-0.064	-0.386	-1.321	-0.541	0.882	-0.961	-0.535	1.249	0.378	0.078	0.387	1.355	0.554	-0.845	0.938	0.774	-2.202	-0.78	-0.094	-0.692	-2.344	-0.926	1.55	-1.671	-0.869	2.185	0.73	0.069	0.647	2.427	1.098	-1.522	1.656
0.046	-1.184	-0.548	0.03	1.06	-0.73	-0.08	0.13	1.234	0.037	-1.445	0.112	0.04	-0.793	-1.154	0.047	0.574	-1.244	0.015	1.428	-0.134	-0.131	0.831	1.107	-0.018	-0.582	1.211	0.002	-2.53	0.279	0.273	-1.382	-2.012	0.099	1.04	-2.24	-0.065	2.47	-0.188	-0.231	1.385	2.045	-0.068	-0.997	2.219
0.551	-1.155	-0.045	0.142	0.776	-0.973	-0.631	0.357	1.049	0.264	-1.222	0.615	0.778	-0.961	-0.699	0.474	0.225	-1.298	-0.202	1.225	-0.537	-0.724	0.963	0.695	-0.443	-0.28	1.3	0.372	-2.177	1.038	1.444	-1.637	-1.186	0.857	0.583	-2.228	-0.436	2.189	-1.036	-1.439	1.62	1.182	-0.945	-0.529	2.155
1.059	-0.778	0.08	-0.313	0.6	-1.135	-0.723	0.156	1.036	0.886	-0.851	0.781	1.114	-0.62	-0.623	0.262	0.276	-1.366	-0.836	0.852	-0.781	-1.127	0.533	0.557	-0.244	-0.241	1.388	1.57	-1.475	1.354	1.946	-1.084	-1.172	0.352	0.53	-2.423	-1.577	1.539	-1.297	-1.958	0.925	1.144	-0.387	-0.385	2.439
1.273	-0.326	0.076	-0.388	0.743	-0.968	-0.881	-0.425	0.897	1.044	-0.69	0.617	1.36	0.069	-0.481	0.289	0.752	-1.164	-1.022	0.656	-0.663	-1.339	-0.022	0.546	-0.323	-0.781	1.156	1.87	-1.083	1.218	2.356	0.067	-0.892	0.515	1.284	-2.079	-1.804	1.142	-1.155	-2.371	0.043	0.854	-0.575	-1.437	2.042
1.247	0.005	-0.294	-0.878	0.299	-0.902	-0.371	-0.232	1.182	1.347	-0.151	0.36	1.007	0.182	-0.917	-0.331	0.395	-1.295	-1.321	0.179	-0.412	-1.007	-0.152	0.91	0.3	-0.283	1.321	2.342	-0.343	0.76	1.805	0.097	-1.721	-0.561	0.662	-2.368	-2.427	0.211	-0.579	-1.761	-0.253	1.641	0.608	-0.544	2.301
1.18	-0.319	0.374	-0.15	0.542	-1.163	-1.011	-0.198	0.738	0.838	-0.485	0.943	1.401	-0.099	-0.238	0.543	0.46	-1.198	-0.822	0.572	-1.001	-1.359	0.12	0.219	-0.557	-0.51	1.154	1.362	-0.977	1.757	2.44	-0.31	-0.486	1.008	0.748	-2.104	-1.571	0.949	-1.738	-2.361	0.267	0.528	-0.922	-0.736	2.163
0.933	0.551	0.606	-0.196	0.211	-1.29	-0.742	-0.799	0.637	0.701	0.215	1.177	1.063	0.816	-0.042	0.349	0.604	-1.224	-0.726	-0.211	-1.222	-1.117	-0.804	0.05	-0.284	-0.708	1.149	1.267	0.296	2.116	1.812	1.644	0.02	0.759	1.113	-2.09	-1.336	-0.338	-2.095	-1.989	-1.374	0.144	-0.499	-1.253	2.016
1.276	-0.057	-0.033	-0.631	-0.343	-1.057	-0.633	0.47	0.997	1.188	0.229	0.606	1.21	-0.326	-0.688	-0.022	-0.45	-1.356	-1.161	-0.173	-0.652	-1.194	0.335	0.63	0.008	0.552	1.236	2.196	0.294	1.119	2.18	-0.602	-1.011	-0.126	-0.869	-2.371	-2.076	-0.569	-1.014	-2.121	0.509	1.233	-0.082	1.071	2.266
0.915	0.655	0.602	0.345	-0.898	-0.833	-1.228	0.247	0.221	0.365	0.974	0.903	1.375	0.27	0.226	0.975	-0.666	-0.699	-0.321	-1.028	-0.873	-1.341	-0.331	-0.163	-0.979	0.791	0.581	0.467	1.66	1.747	2.429	0.441	0.332	1.744	-1.156	-1.289	-0.643	-1.867	-1.497	-2.369	-0.464	-0.374	-1.702	1.376	1.106
0.99	-0.013	0.847	0.112	-0.622	-1.175	-1.054	0.587	0.296	0.536	0.27	1.272	1.339	-0.302	0.315	0.78	-0.786	-0.94	-0.563	-0.4	-1.284	-1.222	0.381	-0.339	-0.755	0.725	0.902	0.917	0.623	2.21	2.323	-0.584	0.769	1.394	-1.205	-1.683	-1.089	-0.71	-2.155	-2.257	0.568	-0.584	-1.403	1.421	1.518
0.643	0.499	1.038	0.653	-0.43	-0.999	-1.29	-0.03	-0.006	-0.042	0.572	1.277	1.263	0.364	0.697	1.254	-0.229	-0.626	-0.022	-0.564	-1.255	-1.199	-0.314	-0.59	-1.24	0.264	0.579	-0.174	1.115	2.192	2.219	0.619	1.108	2.17	-0.533	-1.126	0.024	-1.121	-2.247	-2.128	-0.679	-1.068	-2.125	0.505	1.06
0.99	0.266	0.731	0.168	-0.613	-1.124	-1.185	0.277	0.395	0.503	0.495	1.169	1.362	0.004	0.206	0.846	-0.566	-0.975	-0.54	-0.601	-1.146	-1.376	-0.05	-0.147	-0.859	0.551	0.898	0.912	0.899	2.102	2.431	0.019	0.396	1.567	-0.919	-1.711	-0.87	-1.017	-2.06	-2.467	0.06	-0.394	-1.507	1.125	1.663
1.086	0.26	0.671	0.009	-0.016	-1.285	-1.122	-0.164	0.603	0.623	0.196	1.22	1.424	0.311	0.046	0.698	0.11	-1.21	-0.683	-0.125	-1.216	-1.395	-0.252	-0.023	-0.731	-0.05	1.157	1.168	0.215	2.177	2.485	0.47	0.069	1.206	0.161	-2.095	-1.146	-0.39	-2.183	-2.409	-0.553	-0.047	-1.24	-0.092	2.105
1.165	-0.319	0.418	-0.168	1.032	-0.814	-1.003	-0.685	0.394	0.823	-0.837	0.736	1.375	0.239	0.053	0.531	1.098	-0.741	-0.856	0.862	-0.79	-1.343	-0.202	0.03	-0.544	-1.093	0.706	1.476	-1.493	1.259	2.423	0.389	0.133	1.054	1.868	-1.38	-1.514	1.432	-1.405	-2.41	-0.407	0.153	-1.016	-1.856	1.246
0.985	-0.759	-0.288	-0.271	0.953	-0.772	-0.729	-0.211	1.053	0.777	-1.06	0.318	1.087	-0.351	-0.866	0.303	0.761	-1.1	-0.817	1.027	-0.354	-1.14	0.306	0.81	-0.245	-0.721	1.174	1.332	-1.993	0.527	1.905	-0.782	-1.447	0.558	1.444	-1.906	-1.432	1.872	-0.714	-1.958	0.641	1.356	-0.369	-1.145	2.202
1.273	0.024	-0.259	-0.833	-0.518	-0.823	-0.352	0.448	1.151	1.395	0.299	0.395	1.016	-0.257	-0.86	-0.273	-0.622	-1.226	-1.281	-0.371	-0.32	-0.994	0.272	0.895	0.345	0.57	1.281	2.447	0.538	0.507	1.713	-0.419	-1.644	-0.695	-0.999	-2.207	-2.304	-0.549	-0.637	-1.844	0.474	1.544	0.475	1.064	2.274
0.228	-1.317	0.038	-1.202	0.426	0.162	0.956	0.815	-0.214	0.911	-1.141	-0.085	-0.48	-1.366	0.144	-1.387	-0.279	0.243	-0.888	1.077	0.074	0.451	1.315	-0.187	1.351	0.216	-0.223	1.676	-1.872	-0.094	-0.932	-2.263	0.364	-2.359	-0.455	0.399	-1.577	1.953	-0.004	0.769	2.364	-0.295	2.465	0.45	-0.335
0.096	-1.261	-0.231	-1.001	0.461	0.653	0.91	0.815	-0.433	0.703	-1.089	-0.554	-0.526	-1.294	0.123	-1.164	-0.23	0.655	-0.718	1.105	0.569	0.561	1.302	-0.087	1.155	0.242	-0.732	1.264	-1.898	-1.074	-0.894	-2.285	0.235	-2.14	-0.371	1.224	-1.295	1.861	1.056	1.013	2.259	-0.141	2.042	0.397	-1.274
1.047	-0.536	-0.418	-1.068	-0.713	0.232	0.005	1.273	0.24	1.308	0.085	-0.368	0.668	-1.091	-0.421	-0.64	-1.225	0.008	-1.388	-0.114	0.434	-0.655	1.134	0.451	0.668	1.268	0.025	2.292	0.151	-0.704	1.2	-1.996	-0.684	-1.037	-2.164	-0.02	-2.382	-0.31	0.748	-1.232	2.036	0.632	1.198	2.226	-0.102
0.66	-0.236	-1.081	-0.854	-0.821	0.435	0.243	1.05	0.725	0.986	0.321	-0.899	0.283	-0.778	-1.121	-0.671	-1.166	-0.145	-0.947	-0.37	0.973	-0.262	0.83	1.14	0.728	1.146	0.24	1.581	0.687	-1.741	0.355	-1.338	-2.102	-1.183	-2.112	-0.41	-1.603	-0.802	1.77	-0.471	1.424	2.059	1.204	2.157	0.236
0.809	-0.737	-0.671	-1.229	-0.362	0.192	0.385	1.092	0.478	1.294	-0.27	-0.532	0.235	-1.125	-0.739	-1.038	-0.917	-0.175	-1.291	0.231	0.545	-0.282	1.173	0.701	0.999	0.891	0.199	2.309	-0.384	-0.92	0.367	-2.022	-1.255	-1.775	-1.659	-0.393	-2.226	0.484	0.937	-0.419	1.983	1.334	1.828	1.614	0.298
0.907	0.228	-0.907	-1.236	0	-0.326	0.363	-0.2	1.236	1.361	0.114	-0.366	0.361	0.325	-1.343	-1.011	0.223	-0.956	-1.32	-0.22	0.339	-0.34	-0.282	1.361	1.03	-0.093	0.972	2.366	0.11	-0.718	0.545	0.551	-2.34	-1.837	0.387	-1.651	-2.313	-0.414	0.566	-0.556	-0.622	2.344	1.714	-0.079	1.791
1.243	0.068	-0.186	-0.835	0.423	-0.913	-0.423	-0.437	1.127	1.263	-0.244	0.429	1.074	0.376	-0.773	-0.24	0.535	-1.279	-1.338	0.275	-0.439	-1.059	-0.293	0.811	0.266	-0.524	1.319	2.308	-0.416	0.739	1.953	0.589	-1.438	-0.41	0.864	-2.275	-2.341	0.397	-0.823	-1.891	-0.564	1.442	0.418	-0.997	2.287
0.305	0.53	-1.138	-1.055	-0.696	0.139	0.72	0.223	1.016	0.867	0.767	-0.788	-0.299	0.241	-1.355	-1.074	-0.613	-0.57	-0.917	-0.685	0.843	0.204	-0.113	1.363	1.149	0.538	0.549	1.562	1.336	-1.416	-0.459	0.341	-2.437	-1.896	-1.23	-0.989	-1.618	-1.269	1.339	0.39	-0.212	2.494	2.092	0.899	0.967
-0.152	0.849	-0.961	-0.448	-1.193	-0.095	0.665	0.339	1.061	0.188	1.281	-0.529	-0.472	0.322	-1.293	-0.598	-0.988	-0.763	-0.226	-1.267	0.589	0.495	-0.3	1.29	0.768	0.942	0.719	0.334	2.293	-0.871	-0.863	0.548	-2.227	-1.193	-1.709	-1.387	-0.553	-2.228	1.022	0.794	-0.568	2.178	1.325	1.674	1.272
0.016	0.519	-1.166	-0.93	-0.834	0.312	0.882	0.358	0.861	0.574	0.877	-0.926	-0.55	0.118	-1.273	-1.175	-0.734	-0.356	-0.591	-0.829	0.946	0.553	-0.066	1.309	1.113	0.735	0.318	1.047	1.508	-1.647	-0.917	0.032	-2.253	-2.006	-1.391	-0.595	-0.967	-1.518	1.627	1.002	-0.193	2.271	1.918	1.46	0.579
-0.038	-0.049	-1.284	-0.804	-0.685	0.682	0.859	0.732	0.577	0.485	0.437	-1.256	-0.55	-0.52	-1.164	-1.039	-0.931	0.058	-0.472	-0.375	1.222	0.549	0.506	1.166	1.067	0.876	-0.085	0.851	0.644	-2.286	-1.07	-0.931	-2.041	-1.916	-1.516	0.164	-0.836	-0.617	2.194	1.004	0.851	2.054	1.926	1.576	-0.026
-0.033	-0.781	-1.024	-0.904	-0.083	0.879	0.952	0.849	0.098	0.553	-0.439	-1.213	-0.621	-1.034	-0.728	-1.187	-0.537	0.47	-0.515	0.385	1.177	0.607	1.027	0.694	1.196	0.562	-0.513	1.096	-0.82	-2.053	-1.132	-1.796	-1.274	-2.093	-0.906	0.919	-0.989	0.579	2.157	0.972	1.925	1.218	2.112	1.053	-0.853
1.155	0.081	-0.516	-0.869	-0.727	-0.539	-0.272	0.577	1.148	1.24	0.516	0.038	0.945	-0.368	-1	-0.371	-0.855	-1.015	-1.265	-0.536	0.018	-0.909	0.23	1.098	0.396	0.849	1.085	2.273	0.921	-0.01	1.543	-0.586	-1.835	-0.7	-1.387	-1.945	-2.251	-0.83	-0.079	-1.644	0.502	1.781	0.743	1.545	1.866
1.022	0.149	-0.723	-1.03	-0.65	-0.465	-0.039	0.463	1.183	1.255	0.479	-0.161	0.669	-0.203	-1.203	-0.629	-0.704	-1.064	-1.318	-0.541	0.188	-0.678	0.196	1.204	0.59	0.683	1.026	2.273	0.877	-0.28	1.197	-0.323	-2.14	-1.09	-1.094	-1.893	-2.315	-0.85	0.322	-1.124	0.341	2.182	1.171	1.138	1.819
0.913	-0.337	-0.815	-1.015	-0.779	0.28	0.071	1.164	0.575	1.239	0.262	-0.651	0.489	-0.889	-0.878	-0.712	-1.198	-0.156	-1.209	-0.264	0.694	-0.572	1.022	0.867	0.693	1.18	0.215	2.153	0.348	-1.218	0.852	-1.597	-1.628	-1.296	-2.122	-0.479	-2.026	-0.568	1.287	-0.867	1.721	1.628	1.258	2.106	0.318
0.692	-0.425	-1.008	-1.236	-0.313	0.145	0.547	0.786	0.889	1.222	-0.078	-0.675	0.095	-0.723	-1.219	-1.125	-0.671	-0.468	-1.211	0.087	0.745	-0.099	0.819	1.217	1.126	0.681	0.462	2.029	-0.105	-1.334	0.158	-1.329	-2.132	-1.899	-1.271	-0.843	-2.196	0.161	1.293	-0.054	1.339	2.172	1.955	1.089	0.782
1.058	-0.331	-0.664	-0.852	-0.914	0.428	-0.203	1.234	0.271	1.176	0.365	-0.674	0.826	-0.989	-0.579	-0.398	-1.356	0.104	-1.219	-0.367	0.709	-0.771	0.974	0.611	0.393	1.346	-0.086	2.082	0.706	-1.2	1.404	-1.811	-1.002	-0.696	-2.424	0.061	-2.051	-0.662	1.308	-1.358	1.769	0.911	0.613	2.45	-0.164
0.913	-0.506	-0.726	-1.152	-0.553	0.011	0.275	0.988	0.751	1.272	0.043	-0.458	0.459	-1.012	-0.904	-0.872	-0.994	-0.463	-1.297	-0.07	0.495	-0.394	0.92	0.912	0.92	0.945	0.501	2.248	0.098	-0.869	0.72	-1.626	-1.664	-1.608	-1.62	-0.898	-2.299	0.019	0.796	-0.724	1.651	1.689	1.576	1.645	0.862
1.15	0.087	-0.615	-0.442	-1.146	0.382	-0.678	1.059	0.207	0.978	0.769	-0.645	1.206	-0.602	-0.511	0.15	-1.381	0.094	-0.986	-0.777	0.622	-1.111	0.628	0.538	-0.164	1.365	-0.16	1.584	1.38	-1.259	2.101	-1.119	-0.856	0.302	-2.497	0.202	-1.75	-1.381	1.138	-1.984	1.089	1.101	-0.326	2.527	-0.262
0.41	-0.793	-0.941	-1.177	-0.157	0.485	0.756	0.944	0.431	1.007	-0.445	-0.862	-0.234	-1.045	-0.921	-1.223	-0.735	0.062	-1.004	0.425	0.853	0.206	1.126	0.825	1.222	0.662	-0.016	1.796	-0.755	-1.491	-0.421	-1.95	-1.577	-2.104	-1.169	0.16	-1.764	0.817	1.454	0.345	1.967	1.431	2.172	1.104	0.083
0.513	-0.418	-1.118	-1.281	0.124	0.165	0.783	0.319	0.927	1.141	-0.361	-0.814	-0.172	-0.437	-1.291	-1.291	-0.14	-0.479	-1.127	0.378	0.786	0.18	0.508	1.276	1.303	0.111	0.462	2.015	-0.569	-1.468	-0.32	-0.734	-2.32	-2.329	-0.21	-0.879	-1.953	0.587	1.493	0.269	0.73	2.311	2.284	0.138	0.922
-0.305	-0.417	-1.207	-0.938	0.238	0.816	1.212	0.204	0.347	0.395	-0.403	-1.287	-0.975	-0.378	-1.004	-1.375	0.087	0.277	-0.396	0.388	1.251	0.951	0.39	0.971	1.328	-0.023	-0.312	0.749	-0.67	-2.25	-1.713	-0.788	-1.624	-2.355	-0.091	0.646	-0.76	0.58	2.227	1.757	0.828	1.583	2.394	0.081	-0.477
-1.248	-0.048	0.112	0.633	1.05	0.392	0.635	-0.996	-0.482	-1.154	-0.694	-0.228	-1.197	0.608	0.43	-0.011	1.279	0.576	1.211	0.695	0.172	1.213	-0.607	-0.321	-0.013	-1.266	-0.579	-2.135	-1.202	-0.358	-2.068	0.98	0.837	-0.062	2.353	0.891	2.116	1.256	0.312	2.124	-1.133	-0.709	-0.025	-2.27	-1.025
-1.261	0.001	-0.079	0.564	-0.188	1.134	0.697	0.174	-1.064	-1.142	0.036	-0.768	-1.239	-0.043	0.624	-0.088	-0.174	1.388	1.145	-0.18	0.75	1.26	0.115	-0.612	0.064	0.216	-1.4	-1.983	0.127	-1.377	-2.221	-0.015	1.068	-0.002	-0.271	2.483	1.979	-0.372	1.346	2.182	0.083	-1.059	0.045	0.477	-2.441
-0.5	-0.086	-1.167	-0.494	0.841	0.821	0.988	-0.754	0.352	-0.006	-0.55	-1.25	-0.935	0.395	-0.951	-0.96	0.921	0.315	0.024	0.658	1.238	0.911	-0.413	0.954	0.952	-1.008	-0.29	0.049	-0.982	-2.283	-1.742	0.606	-1.614	-1.727	1.675	0.494	0.124	1.236	2.204	1.71	-0.678	1.693	1.6	-1.86	-0.509
0.411	-0.254	-1.221	-1.24	0.179	0.247	0.872	0.185	0.924	1.045	-0.249	-0.947	-0.256	-0.223	-1.361	-1.309	0.025	-0.433	-1.032	0.341	0.889	0.31	0.354	1.291	1.344	0.009	0.444	1.79	-0.575	-1.638	-0.577	-0.369	-2.391	-2.349	-0.191	-0.729	-1.779	0.431	1.686	0.483	0.511	2.367	2.329	-0.064	0.82
1.183	-0.251	-0.495	-1.005	-0.06	-0.776	-0.164	0.302	1.255	1.365	-0.111	0.179	0.872	-0.372	-1.128	-0.532	-0.178	-1.274	-1.364	0.059	-0.19	-0.842	0.367	1.08	0.535	0.213	1.294	2.366	-0.062	0.437	1.539	-0.681	-1.911	-0.913	-0.288	-2.277	-2.439	0.16	-0.327	-1.572	0.628	1.814	0.986	0.264	2.304
0.747	-0.213	-1.017	-1.294	0.271	-0.17	0.499	-0.083	1.192	1.248	-0.289	-0.523	0.151	-0.129	-1.388	-1.133	0.248	-0.869	-1.317	0.273	0.539	-0.169	0.075	1.407	1.109	-0.236	0.848	2.234	-0.417	-1.017	0.393	-0.105	-2.475	-1.973	0.454	-1.502	-2.245	0.352	1.05	-0.231	0.206	2.467	1.935	-0.431	1.463
1.249	-0.175	0.085	-0.572	0.126	-1.123	-0.703	-0.016	1.082	1.144	-0.243	0.784	1.209	-0.1	-0.608	0.082	0.119	-1.384	-1.165	0.123	-0.731	-1.243	0.105	0.657	-0.087	-0.155	1.386	2.085	-0.284	1.266	2.149	-0.143	-1.175	0.239	0.222	-2.471	-2.096	0.156	-1.34	-2.164	0.351	1.174	-0.154	-0.152	2.441
1.085	-0.514	-0.419	-1.015	0.04	-0.765	-0.066	0.511	1.201	1.325	-0.331	0.23	0.722	-0.635	-1.017	-0.612	-0.274	-1.25	-1.304	0.346	-0.186	-0.723	0.706	1.027	0.601	0.276	1.235	2.317	-0.697	0.327	1.325	-1.074	-1.792	-1.047	-0.438	-2.245	-2.346	0.62	-0.41	-1.275	1.144	1.858	1.017	0.356	2.222
1.28	-0.167	0.173	-0.457	0.595	-1.022	-0.826	-0.421	0.903	1.108	-0.432	0.794	1.303	0.114	-0.456	0.221	0.625	-1.177	-1.078	0.501	-0.745	-1.356	-0.163	0.464	-0.205	-0.631	1.248	2.023	-0.764	1.304	2.309	0.223	-0.861	0.317	1.03	-2.19	-1.915	0.915	-1.297	-2.339	-0.256	0.785	-0.388	-1.163	2.131
1.089	-0.607	-0.317	-0.682	0.578	-0.933	-0.387	0.004	1.24	1.164	-0.764	0.366	0.893	-0.392	-0.977	-0.142	0.376	-1.359	-1.147	0.724	-0.399	-0.885	0.389	0.984	0.165	-0.393	1.362	2.014	-1.27	0.763	1.607	-0.636	-1.668	-0.325	0.519	-2.388	-1.935	1.308	-0.768	-1.679	0.745	1.656	0.27	-0.606	2.427
0.861	-0.811	-0.566	-1.016	0.404	-0.652	0.174	0.367	1.21	1.205	-0.781	0.051	0.414	-0.754	-1.12	-0.709	-0.004	-1.168	-1.191	0.763	-0.07	-0.386	0.782	1.097	0.712	-0.101	1.192	2.14	-1.339	0.132	0.811	-1.323	-2.008	-1.465	0.132	-2.003	-2.131	1.26	-0.08	-0.718	1.385	1.881	1.317	-0.019	2.096
0.574	-0.761	-0.858	-0.281	1.207	-0.357	-0.333	-0.436	1.176	0.467	-1.237	-0.346	0.604	-0.192	-1.287	0.064	1.028	-0.963	-0.597	1.256	0.289	-0.567	0.213	1.255	-0.065	-1.045	0.956	0.921	-2.154	-0.52	1.139	-0.469	-2.203	0.145	1.775	-1.71	-1.05	2.179	0.497	-1	0.416	2.245	-0.061	-1.772	1.784
0.096	-0.788	-0.996	-0.6	1.141	-0.144	0.467	-0.366	1.122	0.398	-1.234	-0.526	-0.22	-0.253	-1.354	-0.725	0.925	-0.806	-0.417	1.22	0.529	0.262	0.3	1.349	0.612	-0.989	0.766	0.713	-2.169	-0.946	-0.369	-0.467	-2.387	-1.24	1.661	-1.327	-0.658	2.24	0.915	0.608	0.53	2.343	1.035	-1.763	1.442
-0.531	0.389	-1.094	0.803	0.756	0.629	-0.258	-1.175	0.492	-0.804	-0.266	-1.122	-0.188	0.999	-0.946	0.645	1.23	0.109	0.862	0.19	1.096	0.156	-1.001	1.056	-0.636	-1.224	-0.13	-1.419	-0.41	-1.986	-0.473	1.736	-1.646	1.14	2.189	0.091	1.652	0.409	1.8	0.193	-1.692	1.9	-1.129	-2.161	-0.223
-0.404	0.167	-1.174	0.646	0.956	0.596	-0.212	-1.118	0.616	-0.695	-0.463	-1.115	-0.059	0.778	-1.095	0.532	1.346	0.017	0.689	0.458	1.112	0.184	-0.806	1.129	-0.581	-1.302	0.042	-1.294	-0.749	-1.982	-0.163	1.307	-2.015	0.915	2.36	-0.01	1.211	0.833	1.964	0.215	-1.45	1.997	-0.953	-2.31	-0.045
-1.167	0.474	-0.35	0.906	0.787	0.414	0.26	-1.27	-0.074	-1.286	-0.2	-0.508	-0.92	1.096	-0.144	0.399	1.258	0.364	1.312	0.224	0.419	0.926	-1.115	0.127	-0.43	-1.282	-0.281	-2.265	-0.387	-1.034	-1.583	1.97	-0.225	0.722	2.249	0.641	2.302	0.427	0.718	1.609	-1.949	0.387	-0.785	-2.291	-0.463
-0.542	0.85	-0.804	1.14	0.287	0.584	-0.578	-1.14	0.267	-1.024	0.362	-0.893	0.005	1.238	-0.64	1.088	0.894	0.224	1.071	-0.352	0.899	-0.035	-1.252	0.706	-1.056	-0.898	-0.186	-1.85	0.591	-1.504	0.011	2.286	-1.001	1.848	1.626	0.172	1.884	-0.676	1.54	-0.081	-2.236	1.244	-1.861	-1.584	-0.561
-0.94	0.736	0.438	1.227	0.498	-0.04	-0.257	-1.21	-0.444	-1.344	0.173	0.303	-0.422	1.214	0.524	0.953	1.058	0.23	1.375	-0.103	-0.309	0.457	-1.16	-0.58	-0.947	-1.125	-0.276	-2.413	0.337	0.532	-0.82	2.148	0.94	1.597	1.89	0.446	2.365	-0.405	-0.525	0.811	-2.076	-0.979	-1.611	-1.95	-0.306
-0.476	1.047	0.615	1.268	-0.108	-0.173	-0.792	-0.871	-0.51	-1.089	0.723	0.494	0.199	1.274	0.658	1.281	0.497	0.164	1.101	-0.688	-0.525	-0.186	-1.177	-0.725	-1.307	-0.468	-0.227	-2.043	1.187	0.823	0.36	2.069	1.33	2.304	0.759	0.569	2.046	-1.282	-0.743	-0.357	-2.06	-1.282	-2.31	-0.833	-0.536
-0.308	1.104	-0.568	1.225	-0.247	0.234	-0.921	-0.881	0.212	-0.97	0.856	-0.488	0.383	1.211	-0.614	1.365	0.398	-0.038	0.947	-0.862	0.463	-0.376	-1.269	0.442	-1.359	-0.392	-0.054	-1.644	1.626	-0.733	0.679	2.255	-0.82	2.352	0.722	0.133	1.739	-1.58	0.854	-0.722	-2.278	0.748	-2.394	-0.688	0.107
-0.952	-0.01	-0.873	0.277	1.056	0.647	0.624	-1.067	0.278	-0.775	-0.677	-0.956	-1.044	0.651	-0.667	-0.226	1.34	0.237	0.749	0.646	0.986	0.969	-0.694	0.766	0.208	-1.315	-0.243	-1.209	-1.149	-1.904	-1.702	1.206	-1.31	-0.465	2.393	0.524	1.4	1.21	1.625	1.715	-1.242	1.338	0.381	-2.369	-0.395
-1.214	-0.085	-0.456	0.396	1.029	0.655	0.822	-0.947	-0.142	-0.996	-0.708	-0.66	-1.3	0.553	-0.186	-0.264	1.215	0.576	1.009	0.72	0.664	1.278	-0.52	0.194	0.282	-1.266	-0.452	-1.67	-1.3	-1.25	-2.325	0.96	-0.438	-0.438	2.223	0.914	1.774	1.286	1.23	2.291	-0.962	0.333	0.36	-2.201	-0.925
-1.056	0.51	-0.546	0.593	0.646	0.939	0.495	-1.115	-0.47	-1.02	-0.093	-0.93	-0.96	1.075	-0.117	0.095	1.141	0.826	1.018	0.074	0.947	0.981	-1.005	-0.009	-0.039	-1.097	-0.9	-1.923	-0.301	-1.505	-1.756	1.77	-0.125	0.233	2.016	1.423	1.812	0.178	1.691	1.779	-1.749	0.145	-0.22	-2.01	-1.446
-0.48	0.802	0.852	0.681	-1.006	0.397	-0.176	0.227	-1.246	-0.724	1.125	0.304	-0.192	0.385	1.301	0.544	-0.757	1.047	0.761	-1.127	-0.299	0.256	-0.335	-1.311	-0.586	0.764	-1.034	-1.095	2.14	0.535	-0.372	0.58	2.351	0.857	-1.419	1.851	1.165	-2.108	-0.524	0.345	-0.621	-2.356	-0.958	1.374	-1.864
0.247	0.791	0.988	0.769	-0.945	-0.307	-1.104	0.148	-0.665	-0.367	1.107	0.827	0.818	0.4	1.031	1.114	-0.733	0.262	0.324	-1.064	-0.834	-0.882	-0.359	-1.093	-1.214	0.632	-0.157	-0.475	1.854	1.541	1.482	0.619	1.836	2.042	-1.224	0.506	0.688	-1.784	-1.622	-1.405	-0.578	-2.037	-2.126	1.128	-0.26
-0.386	0.215	1.194	1.159	-0.599	-0.21	-0.778	0.303	-1.009	-0.971	0.502	0.875	0.237	-0.12	1.374	1.248	-0.548	0.457	0.941	-0.597	-0.863	-0.287	-0.023	-1.407	-1.177	0.592	-0.494	-1.62	0.939	1.632	0.403	0.054	2.412	2.188	-0.786	1	1.672	-1.05	-1.583	-0.603	-0.053	-2.458	-2.031	1.09	-0.946
-0.411	0.088	1.233	1.068	-0.661	-0.311	-0.642	0.593	-0.928	-0.975	0.412	0.943	0.2	-0.235	1.384	1.083	-0.747	0.389	0.942	-0.5	-0.979	-0.109	0.384	-1.355	-1.106	0.733	-0.396	-1.698	0.639	1.705	0.312	-0.47	2.417	1.911	-1.304	0.788	1.548	-0.922	-1.797	-0.206	0.689	-2.394	-1.903	1.321	-0.705
-0.242	0.442	1.174	0.871	-0.896	-0.152	-0.577	0.5	-1.028	-0.626	0.892	0.817	0.173	-0.055	1.4	0.846	-0.919	0.544	0.817	-0.754	-0.832	-0.176	0.075	-1.392	-0.911	0.869	-0.55	-1.163	1.562	1.447	0.304	-0.131	2.472	1.306	-1.781	0.925	1.383	-1.43	-1.418	-0.307	0.072	-2.492	-1.645	1.6	-0.92
0.753	0.833	0.57	0.502	-1.015	-0.624	-1.254	0.152	0.054	0.141	1.172	0.743	1.274	0.401	0.327	1.108	-0.749	-0.387	-0.157	-1.179	-0.776	-1.241	-0.477	-0.251	-1.122	0.762	0.346	0.323	2.013	1.421	2.267	0.766	0.567	1.986	-1.146	-0.837	-0.343	-2.101	-1.43	-2.256	-0.778	-0.472	-1.979	1.315	0.75
1.206	0.46	0.031	-0.513	-0.402	-1.093	-0.732	-0.084	1.046	1.06	0.478	0.721	1.21	0.388	-0.669	0.124	-0.244	-1.323	-1.102	-0.527	-0.735	-1.26	-0.288	0.634	-0.124	0.134	1.335	1.93	0.882	1.317	2.168	0.695	-1.137	0.27	-0.315	-2.387	-1.857	-0.87	-1.319	-2.181	-0.484	1.135	-0.238	0.153	2.428
0.783	0.899	0.489	0.361	-0.659	-1.054	-1.186	-0.153	0.513	0.233	1.052	0.949	1.237	0.656	-0.035	0.97	-0.329	-0.991	-0.289	-0.914	-0.999	-1.295	-0.587	-0.028	-0.956	0.328	0.981	0.565	1.689	1.717	2.14	1.186	0.029	1.68	-0.621	-1.676	-0.481	-1.598	-1.841	-2.208	-1.175	0.006	-1.594	0.314	1.89
0.404	1.115	0.511	0.51	-0.448	-1.091	-0.945	-0.668	0.57	-0.059	0.99	1.025	0.828	1.114	-0.057	0.878	0.127	-1.096	0.066	-0.969	-0.969	-0.865	-1.141	0.075	-0.923	-0.122	0.999	-0.171	1.751	1.766	1.424	1.968	-0.092	1.632	0.265	-1.925	0.288	-1.793	-1.655	-1.526	-1.945	0.023	-1.573	-0.243	1.906
0.412	1.129	0.48	0.578	-0.461	-1.068	-0.895	-0.695	0.635	-0.039	0.961	1.016	0.828	1.172	-0.098	0.973	0.121	-1.076	0.136	-0.995	-0.945	-0.821	-1.127	0.122	-0.85	-0.197	1.091	-0.194	1.71	1.775	1.444	2.035	-0.308	1.552	0.334	-1.888	0.174	-1.832	-1.62	-1.602	-1.889	0.112	-1.602	-0.293	1.819
-0.128	1.244	-0.337	0.884	-0.716	-0.555	-0.796	-0.516	0.89	-0.679	1.21	0.12	0.433	1.131	-0.761	1.066	-0.137	-0.896	0.594	-1.21	-0.149	-0.423	-1.09	0.75	-1.086	0.123	0.931	-1.062	2.177	0.248	0.677	2.049	-1.328	1.924	-0.314	-1.623	1.14	-2.143	-0.257	-0.753	-1.983	1.315	-1.83	0.187	1.648
0.12	1.21	-0.55	0.17	-1.028	-0.73	-0.264	-0.122	1.232	-0.007	1.431	0.127	0.243	0.868	-1.168	0.242	-0.559	-1.256	0.081	-1.372	-0.136	-0.189	-0.814	1.087	-0.308	0.589	1.233	-0.197	2.458	0.239	0.482	1.401	-2.032	0.482	-1.035	-2.169	0.061	-2.505	-0.1	-0.391	-1.412	1.872	-0.497	0.95	2.303
-0.15	1.261	0.227	-0.604	-0.541	-0.983	0.805	-0.67	0.736	0.277	1.133	0.777	-0.555	1.256	-0.345	-0.837	0.109	-1.097	-0.297	-1.129	-0.757	0.63	-1.197	0.265	0.902	-0.053	1.109	0.434	1.951	1.474	-1.001	2.155	-0.746	-1.479	0.141	-2.015	-0.605	-1.962	-1.293	0.989	-2.167	0.662	1.543	-0.237	1.965
-0.4	0.831	0.876	-0.697	-0.182	-1.092	1.136	-0.6	0.136	0.217	0.692	1.173	-0.964	0.887	0.462	-1.126	0.311	-0.838	-0.185	-0.654	-1.231	0.972	-0.943	-0.476	1.178	-0.177	0.721	0.299	1.08	2.214	-1.716	1.561	0.93	-2.002	0.535	-1.377	-0.396	-1.149	-2.179	1.706	-1.676	-0.756	2.016	-0.469	1.358
0.136	1.213	0.436	-0.609	-0.268	-1.108	0.473	-0.97	0.688	0.446	0.954	1.014	-0.186	1.341	-0.182	-0.665	0.412	-1.145	-0.485	-0.933	-0.946	0.245	-1.373	0.139	0.647	-0.46	1.156	0.82	1.618	1.652	-0.408	2.361	-0.31	-1.089	0.955	-2.025	-0.925	-1.669	-1.685	0.464	-2.416	0.305	1.135	-0.791	2.027
-0.111	1.079	0.652	-0.947	-0.404	-0.765	1.113	-0.658	-0.001	0.556	0.965	0.839	-0.758	1.069	0.383	-1.3	0.134	-0.536	-0.471	-0.893	-0.93	0.788	-1.057	-0.492	1.316	-0.178	0.465	0.998	1.722	1.512	-1.443	1.911	0.756	-2.351	0.222	-0.822	-1.004	-1.628	-1.461	1.442	-1.892	-0.766	2.229	-0.377	1.052
-0.194	1.251	0.19	-0.631	-0.584	-0.95	0.817	-0.673	0.691	0.251	1.148	0.714	-0.614	1.221	-0.367	-0.858	0.079	-1.1	-0.327	-1.176	-0.702	0.641	-1.205	0.272	0.888	-0.079	1.021	0.483	1.994	1.308	-1.158	2.109	-0.54	-1.512	0.066	-1.92	-0.669	-2.083	-1.138	1.241	-2.01	0.631	1.634	-0.064	1.82
-0.614	1.126	-0.01	-0.575	-1.032	-0.513	1.193	-0.071	0.513	-0.04	1.356	0.31	-1.121	0.771	-0.328	-1.089	-0.586	-0.668	0.005	-1.355	-0.311	1.139	-0.754	0.284	1.115	0.622	0.686	-0.04	2.429	0.531	-1.982	1.309	-0.589	-1.988	-1.034	-1.027	0.051	-2.485	-0.565	2.014	-1.356	0.461	1.936	1.083	1.215
-0.851	0.504	0.832	-0.32	-0.226	-1.199	1.166	-0.339	0.374	-0.334	0.425	1.276	-1.274	0.515	0.297	-0.909	0.043	-0.959	0.309	-0.476	-1.304	1.241	-0.587	-0.271	0.954	-0.064	0.978	-0.554	0.885	2.183	-2.266	0.947	0.562	-1.66	0.084	-1.726	0.543	-0.77	-2.28	2.194	-1.008	-0.544	1.756	0.006	1.788
-0.461	-0.259	1.168	-0.532	0.947	-0.71	1.034	-0.65	-0.446	0.062	-0.73	1.172	-0.93	0.253	1.033	-0.981	1.015	-0.154	-0.017	0.773	-1.192	0.92	-0.239	-1.02	1.044	-0.982	0.188	0.093	-1.382	2.029	-1.66	0.371	1.857	-1.723	1.794	-0.23	-0.104	1.37	-2.074	1.538	-0.503	-1.9	1.759	-1.741	0.29
-0.502	-0.44	1.137	-0.635	0.883	-0.688	1.121	-0.438	-0.435	0.104	-0.83	1.15	-1.052	-0.009	0.993	-1.108	0.814	-0.134	-0.093	0.86	-1.156	0.972	-0.018	-1.001	1.14	-0.804	0.179	0.16	-1.416	2.094	-1.83	0.06	1.721	-1.919	1.482	-0.295	-0.171	1.371	-2.118	1.737	-0.112	-1.725	2.061	-1.398	0.29
-0.448	0.051	1.203	-0.619	0.585	-0.951	1.04	-0.728	-0.265	0.076	-0.402	1.344	-0.921	0.49	0.928	-1.021	0.808	-0.427	-0.153	0.27	-1.378	0.895	-0.568	-0.955	1.061	-0.818	0.458	0.11	-0.622	2.359	-1.611	0.883	1.647	-1.763	1.567	-0.697	-0.232	0.678	-2.363	1.616	-0.904	-1.673	1.942	-1.381	0.758
-0.974	0.328	0.76	-0.015	0.281	-1.275	1.013	-0.599	0.495	-0.634	-0.022	1.263	-1.205	0.634	0.162	-0.65	0.597	-1.108	0.627	-0.059	-1.3	1.24	-0.616	-0.149	0.68	-0.51	1.086	-1.056	0.041	2.306	-2.193	1.152	0.347	-1.108	0.986	-1.972	0.999	-0.136	-2.26	2.15	-1.134	-0.312	1.151	-0.933	1.938
-0.14	-1.11	0.623	-0.877	0.93	0.164	0.99	0.145	-0.775	0.433	-1.288	0.334	-0.698	-0.806	0.842	-1.228	0.483	0.604	-0.439	1.261	-0.288	0.716	0.775	-0.894	1.15	-0.508	-0.568	0.744	-2.289	0.586	-1.201	-1.432	1.501	-2.139	0.931	1.076	-0.663	2.301	-0.606	1.312	1.427	-1.519	2.013	-0.854	-1.069
-0.644	-0.751	-0.818	-0.517	1.083	0.393	1.164	-0.293	0.394	-0.047	-1.139	-0.806	-1.168	-0.269	-0.74	-1.065	0.898	0.012	0.087	1.15	0.727	1.13	0.304	0.751	1.072	-0.85	-0.018	-0.155	-2.091	-1.337	-1.997	-0.525	-1.379	-1.873	1.607	-0.043	0.168	1.971	1.384	1.959	0.536	1.41	1.89	-1.592	0.038
-0.234	-0.967	-0.778	-0.62	1.124	-0.129	0.894	-0.149	0.898	0.297	-1.317	-0.372	-0.728	-0.512	-1.103	-0.904	0.785	-0.66	-0.263	1.338	0.424	0.693	0.523	1.024	0.999	-0.798	0.666	0.409	-2.306	-0.635	-1.327	-0.881	-1.888	-1.653	1.33	-1.145	-0.445	2.402	0.634	1.237	0.908	1.85	1.685	-1.473	1.206
-0.938	-0.876	0.066	-0.237	1.269	0.133	1.192	-0.396	-0.268	-0.405	-1.324	-0.103	-1.357	-0.329	0.215	-0.884	1.003	0.271	0.446	1.397	-0.029	1.298	0.296	-0.251	0.944	-1.053	-0.263	-0.873	-2.264	0.055	-2.359	-0.671	0.326	-1.632	1.757	0.55	0.738	2.403	0.013	2.367	0.454	-0.368	1.717	-1.67	-0.416
0.468	-1.174	-0.129	-1.199	0.276	-0.394	0.746	0.893	0.528	1.056	-0.876	0.131	-0.16	-1.336	-0.379	-1.252	-0.412	-0.554	-1.018	0.931	-0.184	0.153	1.297	0.45	1.256	0.384	0.548	1.899	-1.599	0.249	-0.493	-2.365	-0.611	-2.084	-0.753	-1.085	-1.825	1.706	-0.307	0.217	2.337	0.77	2.252	0.685	0.972
0.691	-0.798	-0.729	-1.175	0.381	-0.411	0.471	0.405	1.127	1.147	-0.766	-0.178	0.156	-0.75	-1.197	-1.039	0.001	-0.971	-1.178	0.723	0.19	-0.157	0.74	1.175	1.04	0.022	0.952	2.065	-1.268	-0.372	0.261	-1.284	-2.071	-1.833	0.031	-1.727	-2.108	1.184	0.424	-0.222	1.265	2.128	1.868	0.102	1.647
0.871	-0.784	-0.529	-1.209	-0.091	-0.362	0.321	0.853	0.935	1.281	-0.469	-0.081	0.361	-1.006	-0.917	-0.985	-0.616	-0.767	-1.293	0.433	0.102	-0.348	1.064	0.937	0.944	0.544	0.831	2.327	-0.893	-0.107	0.594	-1.774	-1.662	-1.764	-0.947	-1.465	-2.311	0.787	0.051	-0.536	1.885	1.68	1.73	0.993	1.4
-0.146	-1.198	-0.401	-1.013	0.631	0.502	1.174	0.486	0.084	0.554	-1.179	-0.497	-0.82	-1.099	-0.224	-1.386	0.061	0.384	-0.528	1.121	0.597	0.824	1.02	0.37	1.392	-0.119	-0.19	0.886	-1.958	-1.129	-1.482	-1.853	-0.628	-2.455	0.155	0.299	-0.893	2.042	0.983	1.454	1.882	0.519	2.455	-0.074	-0.482
-0.18	-1.267	-0.19	-1.017	0.807	0.15	1.188	0.481	0.065	0.51	-1.278	-0.146	-0.862	-1.111	-0.207	-1.413	0.24	-0.008	-0.499	1.285	0.305	0.861	1.092	0.172	1.381	-0.181	-0.055	0.959	-2.269	-0.327	-1.414	-2.008	-0.386	-2.501	0.38	0.022	-0.982	2.293	0.335	1.578	1.88	0.211	2.382	-0.323	0.085
-0.28	-0.926	-0.83	-0.915	0.861	0.357	1.184	0.081	0.467	0.413	-1.102	-0.757	-0.936	-0.644	-0.808	-1.356	0.503	-0.068	-0.377	1.118	0.742	0.897	0.644	0.828	1.334	-0.482	0.05	0.681	-1.944	-1.431	-1.675	-1.166	-1.353	-2.32	0.942	-0.131	-0.653	1.97	1.317	1.615	1.045	1.515	2.378	-0.884	0.096
-0.446	-0.601	-1.021	-0.275	1.222	0.197	0.706	-0.643	0.845	-0.084	-1.116	-0.795	-0.761	-0.02	-1.128	-0.656	1.161	-0.397	0.135	1.147	0.774	0.756	-0.008	1.175	0.574	-1.214	0.42	-0.096	-1.999	-1.409	-1.368	0.026	-2.044	-1.156	2.05	-0.788	0.258	2.018	1.366	1.296	0.06	2.081	1.102	-2.105	0.745
-1.087	0.561	0.292	1.107	0.654	0.066	0.001	-1.259	-0.369	-1.377	-0.053	0.174	-0.675	1.113	0.362	0.695	1.144	0.271	1.402	0.078	-0.139	0.693	-1.131	-0.432	-0.689	-1.255	-0.262	-2.445	-0.151	0.393	-1.171	2.007	0.764	1.114	2.138	0.401	2.481	0.19	-0.264	1.228	-1.986	-0.782	-1.255	-2.094	-0.485
-1.089	0.565	0.315	1.089	0.672	0.058	0.039	-1.257	-0.353	-1.365	-0.049	0.192	-0.684	1.111	0.423	0.661	1.192	0.285	1.395	0.071	-0.176	0.704	-1.162	-0.423	-0.619	-1.21	-0.253	-2.452	-0.072	0.16	-1.266	2.015	0.643	1.179	2.113	0.511	2.457	0.194	-0.304	1.224	-2.097	-0.708	-1.233	-2.107	-0.35
-1.271	-0.071	0.306	0.783	0.827	0.631	0.458	-0.658	-0.96	-1.281	-0.544	-0.192	-1.126	0.441	0.762	0.172	1.026	0.943	1.306	0.539	0.252	1.076	-0.403	-0.733	-0.219	-0.825	-1.085	-2.207	-1.113	-0.294	-1.952	0.518	1.403	0.294	1.79	1.681	2.31	0.927	0.391	1.981	-0.778	-1.296	-0.355	-1.579	-1.832
0.456	-0.783	-0.881	-1.254	0.307	0.021	0.784	0.424	0.917	1.099	-0.674	-0.588	-0.238	-0.807	-1.071	-1.262	-0.105	-0.536	-1.106	0.664	0.594	0.17	0.756	1.139	1.305	0.046	0.599	1.906	-1.109	-1.06	-0.381	-1.461	-1.928	-2.233	-0.079	-1.034	-1.933	1.366	0.902	0.337	1.387	2	2.336	0.015	0.985
1.244	0.282	-0.184	-0.634	-0.645	-0.904	-0.601	0.35	1.074	1.149	0.616	0.43	1.195	-0.084	-0.775	-0.004	-0.644	-1.267	-1.189	-0.562	-0.448	-1.153	0.032	0.795	0.022	0.612	1.232	2.106	1.125	0.701	2.089	-0.19	-1.351	-0.044	-1.198	-2.167	-2.129	-1.076	-0.739	-2.03	0.162	1.432	-0.012	1.207	2.156
1.026	-0.677	-0.195	-1.106	-0.306	-0.63	0.064	0.997	0.834	1.302	-0.266	0.286	0.635	-0.999	-0.655	-0.737	-0.841	-0.936	-1.361	0.258	-0.251	-0.598	1.065	0.66	0.721	0.815	0.917	2.303	-0.587	0.575	1.113	-1.829	-1.212	-1.229	-1.453	-1.649	-2.341	0.494	-0.493	-1.032	1.938	1.054	1.225	1.406	1.704
0.045	-1.243	-0.41	-1.086	0.696	-0.113	1.035	0.538	0.46	0.709	-1.224	-0.214	-0.63	-1.13	-0.562	-1.333	0.072	-0.326	-0.715	1.246	0.1	0.643	1.12	0.506	1.311	-0.104	0.348	1.328	-2.077	-0.33	-1.112	-1.97	-1.016	-2.354	0.153	-0.541	-1.294	2.116	0.329	1.09	1.943	1.047	2.357	-0.145	0.659
-0.485	-1.002	-0.668	-0.619	0.456	1.066	1.066	0.56	-0.39	0.081	-0.93	-1.083	-1.01	-0.952	-0.182	-1.088	-0.005	0.895	-0.077	0.864	1.122	1.016	0.922	0.215	0.99	0.134	-0.951	0.273	-1.715	-1.788	-1.732	-1.729	-0.399	-1.976	-0.03	1.512	-0.114	1.555	1.974	1.778	1.704	0.318	1.86	0.181	-1.632
-0.493	-1.014	-0.604	-0.64	0.489	1.016	1.139	0.54	-0.378	0.103	-0.956	-0.987	-1.028	-0.957	-0.152	-1.123	-0.034	0.891	-0.089	0.953	1.033	0.992	1.002	0.152	1.159	0.028	-0.853	0.081	-1.654	-1.776	-1.777	-1.757	-0.243	-1.979	0.011	1.509	-0.111	1.685	1.82	1.776	1.719	0.085	1.996	-0.041	-1.478
-0.42	-0.849	-0.882	-0.714	0.308	1	1.156	0.532	-0.115	0.166	-0.676	-1.236	-0.958	-0.926	-0.432	-1.161	-0.156	0.694	-0.17	0.725	1.205	0.978	0.85	0.483	1.197	0.162	-0.707	0.285	-1.148	-2.193	-1.691	-1.682	-0.722	-2.171	-0.189	1.167	-0.419	1.363	2.038	1.727	1.52	0.857	2.215	0.157	-1.155
0.204	-1.226	-0.306	-1.184	0.408	0.357	1.019	0.827	-0.034	0.862	-1.051	-0.384	-0.464	-1.264	-0.191	-1.349	-0.256	0.227	-0.888	1.035	0.451	0.507	1.267	0.173	1.424	0.289	-0.236	1.455	-1.831	-0.768	-0.923	-2.248	-0.295	-2.36	-0.524	0.326	-1.57	1.782	0.81	0.839	2.262	0.237	2.468	0.538	-0.35
0.368	-0.059	-1.24	-0.639	-0.966	0.517	0.283	1.053	0.731	0.687	0.539	-1.104	0.013	-0.648	-1.24	-0.577	-1.273	-0.112	-0.623	-0.543	1.078	-0.081	0.725	1.27	0.609	1.267	0.127	1.241	1.013	-1.929	-0.088	-1.236	-2.168	-1.001	-2.335	-0.113	-1.203	-0.979	1.95	-0.087	1.298	2.215	1.111	2.172	0.024
-0.316	-0.014	-1.223	-0.768	-0.569	0.895	1.132	0.451	0.324	0.293	0.298	-1.356	-0.872	-0.354	-0.95	-1.225	-0.672	0.371	-0.225	-0.418	1.313	0.964	0.183	0.938	1.18	0.649	-0.327	0.359	0.689	-2.358	-1.621	-0.399	-1.76	-2.175	-1.052	0.699	-0.368	-0.661	2.34	1.707	0.376	1.617	1.984	1.36	-0.527
-0.668	0.284	-1.052	0.118	-1.2	0.362	0.704	0.883	0.571	-0.448	0.938	-0.922	-0.787	-0.402	-1.083	-0.273	-1.363	-0.209	0.517	-0.908	0.872	0.893	0.369	0.989	0.464	1.289	0.071	-0.952	1.686	-1.486	-1.578	-0.725	-1.79	-0.738	-2.322	-0.14	0.884	-1.606	1.573	1.467	0.698	1.914	0.551	2.348	0.21
-0.097	-1.2	-0.443	-0.551	0.281	1.135	0.752	0.853	-0.631	0.36	-0.98	-0.951	-0.517	-1.298	0.127	-0.788	-0.393	1.148	-0.261	0.916	0.991	0.555	1.297	-0.128	0.895	0.303	-1.042	0.566	-1.656	-1.73	-1.21	-2.185	0.107	-1.408	-0.565	2	-0.325	1.597	1.844	0.876	2.312	-0.346	1.255	0.652	-2.018
-0.403	-0.994	-0.651	-0.598	0.338	1.13	1.019	0.657	-0.422	0.105	-0.78	-1.095	-0.867	-1.098	-0.12	-0.985	-0.235	0.996	-0.131	0.871	1.149	0.908	1.026	0.166	1.015	0.219	-0.962	0.147	-1.323	-2.1	-1.468	-1.983	-0.238	-1.756	-0.408	1.735	-0.38	1.564	1.882	1.583	1.808	0.24	1.829	0.34	-1.654
-1.304	0.103	0.088	0.777	0.744	0.718	0.507	-0.871	-0.779	-1.301	-0.415	-0.401	-1.163	0.604	0.567	0.115	1.016	0.967	1.351	0.389	0.388	1.117	-0.567	-0.572	-0.166	-1.085	-0.882	-2.285	-0.694	-0.673	-2.036	1.092	0.977	0.262	1.781	1.721	2.353	0.697	0.689	1.979	-1.072	-1.097	-0.226	-1.747	-1.683
-1.158	-0.529	-0.073	0.115	1.17	0.488	1.03	-0.612	-0.491	-0.811	-1.02	-0.401	-1.373	0.022	0.251	-0.59	1.123	0.609	0.8	1.096	0.297	1.364	-0.013	-0.278	0.582	-1.138	-0.659	-1.488	-1.752	-0.777	-2.388	-0.017	0.663	-0.983	1.895	1.185	1.461	1.887	0.615	2.396	-0.064	-0.413	1.03	-2.017	-1.093
-0.788	-0.929	-0.412	-0.426	0.954	0.695	1.181	0.001	-0.342	-0.204	-1.167	-0.708	-1.28	-0.592	-0.084	-1.016	0.585	0.637	0.21	1.223	0.66	1.208	0.608	0.011	1.006	-0.598	-0.656	-0.402	-2.038	-1.226	-2.249	-1.005	0.022	-1.828	1	1.229	0.436	2.085	1.272	2.21	1.025	-0.018	1.909	-1.126	-1.139
-1.179	-0.515	-0.062	0.271	0.798	0.963	0.89	-0.292	-0.895	-0.909	-0.829	-0.6	-1.322	-0.141	0.488	-0.376	0.66	1.213	0.889	0.846	0.612	1.283	0.175	-0.561	0.392	-0.731	-1.137	-1.545	-1.494	-1.093	-2.332	-0.239	0.829	-0.767	1.229	2.073	1.661	1.445	1.061	2.348	0.33	-0.892	0.677	-1.251	-1.993
-1.272	-0.049	-0.242	0.444	0.497	1.138	0.81	-0.445	-0.88	-1.092	-0.343	-0.864	-1.304	0.25	0.402	-0.238	0.58	1.297	1.064	0.364	0.861	1.322	-0.281	-0.415	0.207	-0.562	-1.241	-1.979	-0.712	-1.45	-2.322	0.564	0.71	-0.285	0.917	2.31	1.912	0.67	1.379	2.331	-0.416	-0.812	0.383	-1.031	-2.177
-1.147	-0.38	-0.481	0.088	0.276	1.24	1.014	0.048	-0.734	-0.788	-0.443	-1.091	-1.381	-0.295	0.188	-0.606	0.156	1.239	0.763	0.356	1.098	1.362	0.262	-0.167	0.544	-0.17	-1.208	-1.338	-0.685	-1.951	-2.45	-0.346	0.281	-0.96	0.37	2.243	1.368	0.655	1.938	2.43	0.363	-0.338	1.055	-0.223	-2.232
-0.266	-1.213	0.238	-0.298	0.863	0.899	0.662	0.36	-1.017	0.086	-1.304	-0.336	-0.578	-0.98	0.802	-0.599	0.333	1.272	0.057	1.296	0.446	0.597	1.011	-0.756	0.672	-0.331	-1.145	0.17	-2.341	-0.702	-1.171	-1.768	1.295	-1.146	0.526	2.161	-0.078	2.366	0.591	0.813	1.709	-1.579	1.178	-0.516	-2.05
0.758	-0.837	0.608	-1.154	0.275	0.46	0.4	0.578	-1.065	1.186	-0.674	0.086	0.249	-0.897	1.073	-0.974	-0.197	0.962	-1.207	0.721	-0.105	-0.209	0.909	-1.032	0.964	0.177	-0.976	2.031	-1.314	0.052	0.447	-1.573	1.842	-1.638	-0.289	1.76	-2.185	1.157	-0.091	-0.352	1.69	-1.772	1.689	0.291	-1.797
-0.282	-1.239	0.052	-0.589	0.836	0.756	0.88	0.379	-0.842	0.166	-1.288	-0.51	-0.698	-1.052	0.599	-0.896	0.271	1.012	-0.213	1.299	0.402	0.76	0.982	-0.537	0.902	-0.269	-1.048	0.368	-2.332	-0.729	-1.325	-1.793	0.993	-1.545	0.603	1.874	-0.435	2.287	0.801	1.349	1.77	-1.009	1.567	-0.477	-1.848
-0.322	-1.054	0.656	-0.503	1.116	0.246	0.811	-0.078	-1.007	0.117	-1.388	0.233	-0.72	-0.611	0.991	-0.852	0.728	0.739	-0.097	1.379	-0.29	0.681	0.612	-1.124	0.837	-0.76	-0.795	0.174	-2.38	0.555	-1.291	-1.034	1.817	-1.52	1.269	1.343	-0.188	2.444	-0.336	1.351	1.124	-1.751	1.507	-1.384	-1.382
0.846	-0.935	-0.203	-1.277	-0.245	0.243	0.424	1.232	-0.077	1.317	-0.412	-0.297	0.285	-1.343	-0.093	-1.06	-0.889	0.199	-1.356	0.434	0.257	-0.275	1.355	0.046	1.074	0.977	-0.198	2.358	-0.861	-0.319	0.422	-2.377	-0.268	-1.774	-1.647	0.382	-2.408	0.731	0.455	-0.508	2.334	0.033	1.925	1.699	-0.197
1.167	-0.564	0.135	-1.029	-0.716	-0.13	-0.134	1.3	-0.075	1.391	0.121	0.167	0.818	-1.181	0.081	-0.572	-1.242	-0.097	-1.371	-0.105	-0.161	-0.818	1.179	-0.178	0.561	1.276	0.021	2.429	0.223	0.439	1.385	-2.151	0.089	-1.001	-2.18	0.016	-2.425	-0.264	-0.299	-1.418	2.039	-0.204	1.02	2.284	0.127
0.861	-0.74	-0.637	-1.227	-0.407	0.092	0.368	1.074	0.559	1.343	-0.245	-0.397	0.281	-1.165	-0.802	-1.028	-0.949	-0.312	-1.285	0.17	0.479	-0.295	1.081	0.74	0.988	0.937	0.324	2.344	-0.34	-0.72	0.535	-1.96	-1.456	-1.871	-1.608	-0.515	-2.274	0.383	0.905	-0.487	2.023	1.252	1.748	1.674	0.503
0.526	-0.306	-1.167	-0.717	-0.835	0.634	0.147	1.135	0.514	0.769	0.353	-1.137	0.219	-0.938	-1.057	-0.557	-1.251	0.091	-0.801	-0.32	1.099	-0.224	0.879	1.041	0.49	1.264	-0.083	1.354	0.663	-2.089	0.463	-1.595	-1.913	-0.914	-2.278	0.182	-1.416	-0.56	1.997	-0.272	1.544	1.932	0.89	2.237	-0.063
-0.02	-1.032	-0.793	-0.879	0.967	-0.116	0.882	0.065	0.935	0.549	-1.269	-0.402	-0.589	-0.684	-1.096	-1.148	0.559	-0.617	-0.52	1.27	0.412	0.592	0.655	1.086	1.074	-0.533	0.68	1.032	-2.165	-0.685	-1.081	-1.237	-1.945	-1.874	0.976	-1.199	-0.956	2.217	0.653	0.99	1.217	1.911	1.93	-1.007	1.202
0.175	-0.798	-1.028	-0.203	1.274	-0.163	-0.036	-0.468	1.187	0.233	-1.298	-0.525	0.09	-0.214	-1.414	-0.099	1.11	-0.864	-0.3	1.287	0.55	-0.201	0.197	1.387	0.128	-1.066	0.857	0.405	-2.308	-0.976	0.281	-0.299	-2.469	0.042	2.032	-1.434	-0.528	2.302	0.969	-0.377	0.227	2.442	0.327	-1.971	1.478
-0.104	0.436	-1.205	-0.776	0.464	0.873	0.901	-0.911	0.316	0.438	0.001	-1.285	-0.637	0.829	-0.991	-1.103	0.79	0.318	-0.348	0.086	1.322	0.638	-0.853	0.959	1.065	-0.878	-0.363	0.875	0.075	-2.218	-1.181	1.296	-1.796	-1.972	1.33	0.641	-0.775	0.218	2.353	1.147	-1.417	1.7	1.854	-1.476	-0.64
0.286	0.893	-0.881	-1.182	-0.07	0.54	0.917	-0.781	0.426	0.922	0.585	-0.915	-0.366	1.111	-0.727	-1.307	0.496	0.129	-0.927	-0.627	0.897	0.391	-1.004	0.856	1.336	-0.46	-0.039	1.508	0.909	-1.762	-0.744	1.949	-1.434	-2.277	0.853	0.192	-1.644	-1.097	1.528	0.76	-1.879	1.423	2.347	-0.837	-0.147
0.703	0.439	-0.981	-1.037	0.625	0.389	0.339	-1.134	0.58	1.087	-0.101	-0.855	0.247	0.925	-0.99	-0.877	1.065	-0.101	-1.079	0.103	0.824	-0.267	-1.003	0.965	0.9	-1.156	0.128	1.903	-0.128	-1.631	0.35	1.637	-1.726	-1.57	1.983	-0.126	-1.912	0.261	1.55	-0.465	-1.747	1.717	1.682	-1.839	0.244
0.829	-0.098	-0.981	-0.53	1.117	0.287	-0.341	-1.061	0.658	0.829	-0.804	-0.834	0.742	0.606	-1.023	-0.13	1.345	-0.218	-0.89	0.757	0.763	-0.725	-0.59	1.009	0.075	-1.411	0.22	1.488	-1.416	-1.463	1.219	1.24	-1.735	-0.167	2.372	-0.542	-1.375	1.45	1.461	-1.265	-1.05	1.907	0.2	-2.499	0.455
1.131	0.328	-0.553	-0.895	0.89	0.148	-0.198	-1.224	0.378	1.287	-0.351	-0.426	0.854	0.972	-0.622	-0.436	1.326	-0.097	-1.257	0.346	0.377	-0.833	-0.932	0.54	0.474	-1.373	0.165	2.234	-0.715	-0.804	1.471	1.793	-0.989	-0.789	2.342	-0.205	-2.161	0.732	0.695	-1.501	-1.722	0.932	0.656	-2.417	0.435
0.801	0.556	-0.83	-0.943	0.68	0.52	0.165	-1.253	0.301	1.163	-0.059	-0.813	0.362	1.108	-0.743	-0.693	1.212	0.17	-1.09	0.066	0.806	-0.449	-1.104	0.691	0.763	-1.263	-0.129	1.992	-0.084	-1.529	0.535	1.941	-1.365	-1.277	2.152	0.226	-1.831	0.176	1.589	-0.784	-1.946	1.299	1.309	-2.198	-0.201
1.14	-0.234	-0.553	-0.329	1.175	0.293	-0.791	-0.964	0.295	0.927	-0.921	-0.495	1.232	0.479	-0.539	0.268	1.352	-0.017	-0.886	0.847	0.574	-1.227	-0.454	0.517	-0.267	-1.359	0.045	1.622	-1.549	-0.972	2.092	0.772	-0.996	0.417	2.461	-0.017	-1.555	1.671	0.963	-2.171	-0.863	0.872	-0.451	-2.436	0.065
1.081	-0.683	-0.174	-0.401	0.762	-0.963	-0.615	-0.002	1.17	0.924	-0.895	0.502	1.132	-0.372	-0.827	0.173	0.541	-1.322	-0.929	0.888	-0.5	-1.102	0.427	0.839	-0.045	-0.407	1.386	1.579	-1.737	0.885	1.854	-0.813	-1.514	0.26	0.991	-2.309	-1.619	1.662	-0.845	-1.97	0.665	1.437	-0.257	-0.95	2.268
1.007	-0.799	-0.132	0.022	1.22	-0.493	-1.015	-0.434	0.657	0.633	-1.274	0.226	1.268	-0.242	-0.471	0.691	1.044	-0.691	-0.649	1.256	-0.248	-1.295	0.195	0.478	-0.615	-1.01	0.783	1.096	-2.207	0.373	2.258	-0.366	-0.874	1.186	1.879	-1.191	-1.111	2.211	-0.34	-2.277	0.292	0.766	-1.184	-1.779	1.189
0.452	-0.455	1.092	0.76	-0.099	-1.091	-1.157	0.567	-0.004	-0.156	-0.201	1.347	1.015	-0.665	0.704	1.213	-0.443	-0.687	0.242	0.259	-1.367	-1.014	0.619	-0.667	-1.168	0.461	0.662	-0.381	-0.343	2.392	1.829	-1.095	1.367	2.052	-0.76	-1.276	0.242	0.398	-2.426	-1.737	1.122	-1.257	-2.136	0.65	1.208
0.506	-0.362	1.135	0.73	-0.069	-1.053	-1.216	0.384	-0.112	-0.161	-0.18	1.339	1.126	-0.502	0.805	1.215	-0.296	-0.604	0.155	0.138	-1.397	-1.05	0.433	-0.785	-1.239	0.296	0.571	-0.436	-0.441	2.318	2.006	-0.792	1.433	2.238	-0.3	-0.903	0.284	0.395	-2.441	-1.959	0.708	-1.353	-2.179	0.54	1.017
-0.257	0.208	1.264	1.052	-0.639	-0.363	-0.74	0.575	-0.877	-0.811	0.598	1.038	0.332	-0.181	1.346	1.142	-0.731	0.32	0.846	-0.464	-1.002	-0.239	0.305	-1.316	-1.142	0.812	-0.327	-1.486	0.833	1.868	0.537	-0.441	2.384	2.157	-1.189	0.531	1.317	-1.074	-1.777	-0.549	0.288	-2.324	-2.106	1.244	-0.741
-0.515	0.393	1.135	1.074	-0.644	0.022	-0.539	0.317	-1.13	-1.021	0.641	0.705	0.054	0.115	1.446	1.007	-0.585	0.698	1.008	-0.633	-0.655	0.045	0.003	-1.412	-1.043	0.615	-0.72	-1.911	1.033	1.193	0.137	0.13	2.496	1.869	-1.044	1.19	1.88	-1.089	-1.146	-0.179	-0.233	-2.471	-1.845	1.047	-1.325
0.57	-0.047	1.165	0.089	-1.003	-0.795	-0.709	1.002	-0.283	0.297	0.611	1.239	0.77	-0.707	0.969	0.477	-1.298	-0.278	-0.312	-0.606	-1.213	-0.862	0.6	-0.837	-0.488	1.29	0.326	0.673	1.214	2.053	1.333	-1.263	1.721	0.935	-2.22	-0.544	-0.585	-0.989	-2.22	-1.442	1.092	-1.608	-0.796	2.277	0.392
-0.645	-0.038	1.155	1.123	-0.591	-0.147	-0.523	0.607	-1.022	-1.125	0.325	0.81	-0.095	-0.4	1.365	1.013	-0.781	0.569	1.097	-0.344	-0.844	0.037	0.371	-1.393	-1.032	0.777	-0.542	-1.923	0.645	1.496	-0.185	-0.741	2.413	1.924	-1.274	0.942	1.935	-0.586	-1.47	0.078	0.533	-2.433	-1.725	1.474	-0.914
-0.634	1.022	-0.412	-0.275	-0.519	1.167	0.869	-0.53	-0.768	-0.276	0.905	-1.027	-0.923	1.02	0.251	-0.763	-0.019	1.228	0.235	-0.969	0.98	0.96	-0.928	-0.228	0.671	-0.074	-1.236	-0.406	1.684	-1.809	-1.682	1.765	0.415	-1.384	0.002	2.088	0.559	-1.627	1.726	1.779	-1.677	-0.214	1.231	-0.083	-2.176
-0.013	1.226	-0.484	-0.861	-0.341	0.865	0.941	-0.849	-0.319	0.563	1.01	-0.825	-0.581	1.317	-0.086	-1.151	0.295	0.738	-0.467	-0.932	0.893	0.68	-1.287	0.134	1.113	-0.316	-0.709	0.919	1.672	-1.576	-1.056	2.281	-0.078	-1.932	0.505	1.456	-1.039	-1.706	1.438	1.113	-2.25	0.032	1.837	-0.588	-1.418
0.383	0.259	-1.19	-0.953	0.66	0.578	0.612	-0.91	0.655	0.834	-0.242	-1.117	-0.109	0.726	-1.12	-0.971	0.955	-0.091	-0.804	0.303	1.192	0.194	-0.702	1.181	0.958	-1.019	0.057	1.468	-0.313	-1.984	-0.201	1.223	-2.096	-1.935	1.528	-0.189	-1.522	0.529	2.004	0.304	-1.277	2.137	1.785	-1.71	0.027
1.184	-0.185	-0.409	-0.722	1.004	-0.446	-0.476	-0.815	0.911	1.191	-0.74	0.036	1.044	0.392	-0.802	-0.139	1.151	-0.852	-1.232	0.747	0.015	-1.071	-0.44	0.836	0.173	-1.1	0.901	2.089	-1.337	0.056	1.856	0.703	-1.482	-0.192	1.989	-1.505	-2.112	1.328	-0.045	-1.86	-0.637	1.485	0.254	-2.057	1.356
0.709	-0.14	-1.053	-0.637	1.126	0.219	-0.047	-0.94	0.87	0.866	-0.77	-0.769	0.483	0.515	-1.205	-0.347	1.341	-0.397	-0.855	0.787	0.813	-0.413	-0.517	1.256	0.322	-1.249	0.386	1.392	-1.429	-1.535	0.844	0.838	-2.148	-0.642	2.297	-0.683	-1.501	1.417	1.382	-0.774	-1.011	2.148	0.625	-2.219	0.751
1.166	0.276	-0.454	-0.975	0.763	-0.218	-0.191	-1.051	0.724	1.369	-0.314	-0.112	0.836	0.839	-0.737	-0.486	1.144	-0.556	-1.358	0.29	0.158	-0.84	-0.807	0.807	0.479	-1.18	0.564	2.37	-0.54	-0.208	1.462	1.425	-1.411	-0.834	2.074	-1.013	-2.373	0.543	0.145	-1.528	-1.412	1.368	0.903	-2.063	0.996
0.245	0.088	-1.257	-1.036	0.57	0.474	0.816	-0.676	0.717	0.839	-0.269	-1.114	-0.357	0.432	-1.265	-1.16	0.81	-0.169	-0.798	0.27	1.049	0.331	-0.49	1.214	1.206	-0.796	0.128	1.299	-0.542	-1.969	-0.701	0.873	-2.15	-2.085	1.413	-0.222	-1.342	0.443	1.962	0.657	-0.855	2.169	2.111	-1.29	0.367
-0.428	0.411	-1.151	-0.623	0.228	1.07	1.087	-0.631	0.073	0.153	0.097	-1.382	-0.948	0.684	-0.787	-1.068	0.55	0.64	-0.107	-0.129	1.379	1.001	-0.616	0.786	1.054	-0.567	-0.654	0.171	0.16	-2.52	-1.744	1.157	-1.351	-1.952	0.991	1.097	-0.143	-0.135	2.485	1.543	-1.254	1.339	2.04	-0.939	-1.032
-0.972	0.706	-0.476	-0.047	-0.41	1.225	0.998	-0.372	-0.749	-0.588	0.652	-1.079	-1.253	0.662	0.168	-0.678	-0.057	1.225	0.573	-0.729	1.083	1.251	-0.741	-0.186	0.643	0.034	-1.21	-1.019	1.311	-1.753	-2.158	1.263	0.302	-1.052	0.018	2.247	1.083	-1.238	1.895	2.186	-1.241	-0.483	1.013	0.066	-2.209
-0.308	1.166	-0.384	-0.962	-0.851	0.219	1.253	-0.335	0.115	0.396	1.286	-0.409	-0.986	0.905	-0.319	-1.383	-0.322	0.05	-0.435	-1.282	0.354	0.999	-0.956	0.31	1.369	0.321	-0.103	0.675	2.321	-0.638	-1.597	1.692	-0.597	-2.431	-0.605	0.141	-0.756	-2.262	0.697	1.726	-1.637	0.667	2.423	0.539	-0.154
-0.542	0.894	-0.775	-0.682	-0.565	0.938	1.231	-0.319	-0.147	0.101	0.924	-1.073	-1.123	0.773	-0.388	-1.199	-0.196	0.649	-0.082	-0.863	1.123	1.154	-0.715	0.417	1.167	0.101	-0.69	0.235	1.649	-1.837	-2.039	1.225	-0.758	-2.17	-0.409	1.137	-0.17	-1.569	1.965	1.99	-1.33	0.634	2.136	0.41	-1.179
-0.717	1.03	-0.213	-0.545	-1.156	-0.058	1.267	0.116	0.362	-0.116	1.342	-0.042	-1.238	0.597	-0.347	-1.153	-0.824	-0.224	0.124	-1.364	0.117	1.244	-0.591	0.404	1.152	0.819	0.308	-0.196	2.46	-0.209	-2.192	1.056	-0.65	-2.002	-1.373	-0.405	0.192	-2.407	0.177	2.202	-1.13	0.59	1.983	1.415	0.281
-1.085	0.377	0.554	0.11	-1.183	-0.537	0.98	0.825	-0.036	-0.772	1.002	0.669	-1.278	-0.273	0.357	-0.543	-1.232	-0.308	0.757	-1.002	-0.708	1.294	0.299	-0.392	0.555	1.251	0.337	-1.35	1.649	1.354	-2.232	-0.601	0.719	-1.006	-2.174	-0.551	1.298	-1.766	-1.213	2.26	0.606	-0.708	1.018	2.241	0.443
-1.096	0.395	0.512	-0.053	-0.949	-0.844	1.159	0.517	0.347	-0.659	0.799	0.843	-1.405	-0.069	0.127	-0.746	-0.963	-0.722	0.638	-0.823	-0.868	1.452	0.068	-0.119	0.742	0.9	0.776	-1.21	1.478	1.504	-2.496	0.027	0.169	-1.239	-1.694	-1.36	1.144	-1.543	-1.492	2.577	0.139	-0.209	1.201	1.68	1.35
0.805	1	-0.245	-1.279	0.152	0.034	0.471	-1.17	0.123	1.317	0.551	-0.158	0.208	1.342	-0.332	-1.096	0.807	-0.023	-1.322	-0.531	0.081	-0.207	-1.364	0.188	1.093	-0.847	0.035	2.337	0.846	-0.128	0.29	2.411	-0.363	-1.874	1.524	0.089	-2.358	-0.878	0.092	-0.381	-2.439	0.373	1.992	-1.422	0.145
0.276	1.182	0.374	-1.23	-0.329	-0.119	0.964	-0.858	-0.268	0.943	0.968	0.321	-0.413	1.259	0.386	-1.359	0.306	0.119	-0.971	-0.921	-0.352	0.417	-1.302	-0.345	1.405	-0.322	-0.159	1.652	1.711	0.649	-0.844	2.282	0.588	-2.372	0.585	0.196	-1.636	-1.759	-0.483	0.703	-2.292	-0.741	2.476	-0.514	-0.178
0.733	0.676	0.868	-1.199	0.387	-0.236	0.481	-1.025	-0.595	1.182	0.176	0.717	0.202	1.118	0.925	-1.075	0.832	0.297	-1.184	-0.104	-0.739	-0.112	-1.04	-0.934	1.022	-0.891	-0.18	2.135	0.168	1.226	0.298	1.885	1.612	-1.928	1.567	0.409	-2.125	-0.26	-1.249	-0.223	-1.881	-1.554	1.806	-1.57	-0.531
0.136	-0.38	1.259	-0.828	0.884	-0.317	0.619	-0.624	-0.949	0.565	-0.876	1.022	-0.327	0.134	1.357	-0.973	0.918	0.384	-0.592	0.731	-0.983	0.234	-0.241	-1.438	0.92	-0.951	-0.359	1.148	-1.474	1.813	-0.469	0.497	2.36	-1.622	1.714	0.623	-1.114	1.477	-1.672	0.557	-0.24	-2.505	1.674	-1.689	-0.603
0.022	0.041	1.282	-0.312	1.073	-0.69	0.244	-1.121	-0.57	0.198	-0.645	1.239	-0.15	0.725	1.185	-0.423	1.394	-0.079	-0.191	0.632	-1.221	0.135	-0.731	-1.16	0.324	-1.393	0.088	0.194	-1.131	2.141	-0.199	1.236	2.097	-0.53	2.483	-0.168	-0.197	1.079	-2.155	0.331	-1.199	-2.154	0.509	-2.451	0.189
-0.605	-0.009	1.156	-0.098	1.024	-0.799	0.602	-1.035	-0.408	-0.415	-0.696	1.184	-0.747	0.675	0.984	-0.471	1.282	-0.271	0.274	0.649	-1.239	0.77	-0.667	-0.959	0.348	-1.29	0.18	-0.557	-1.184	2.185	-1.228	1.206	1.845	-0.669	2.3	-0.475	0.478	1.142	-2.164	1.453	-1.21	-1.626	0.764	-2.205	0.356
-0.086	0.845	0.971	-0.033	0.446	-1.231	0.047	-1.28	0.243	-0.042	0.251	1.363	-0.133	1.345	0.462	-0.04	1.115	-0.945	-0.03	-0.266	-1.379	0.042	-1.327	-0.443	0.032	-1.091	0.903	0.031	0.463	2.39	-0.174	2.341	0.953	-0.045	1.964	-1.657	0.015	-0.544	-2.44	0.313	-2.275	-0.813	0.032	-1.975	1.606
-0.667	0.34	1.072	0.729	0.864	-0.583	-0.092	-1.197	-0.513	-0.907	-0.317	1.016	-0.357	0.972	1.002	0.468	1.29	-0.079	0.916	0.333	-1.012	0.369	-0.962	-0.972	-0.563	-1.298	-0.01	-1.558	-0.654	1.817	-0.626	1.623	1.82	0.836	2.291	-0.216	1.498	0.695	-1.832	0.755	-1.693	-1.614	-0.831	-2.281	0.08
-1.259	0.142	0.22	0.701	1.063	-0.281	0.523	-1.162	-0.052	-1.242	-0.537	0.237	-1.138	0.819	0.155	0.102	1.414	-0.154	1.213	0.594	-0.403	1.11	-0.781	-0.186	-0.128	-1.407	0.085	-2.192	-1.071	0.492	-1.963	1.39	0.52	0.211	2.514	-0.135	2.215	1.008	-0.481	2.041	-1.412	-0.342	-0.228	-2.53	0.213
-0.621	1.014	-0.455	1.217	0.114	0.393	-0.551	-1.131	0.01	-1.159	0.567	-0.506	-0.005	1.343	-0.357	1.094	0.785	0.258	1.203	-0.569	0.476	0.07	-1.338	0.259	-1.096	-0.795	-0.254	-2.091	1.023	-0.874	-0.072	2.416	-0.586	2.003	1.359	0.442	2.058	-0.995	0.95	0.03	-2.451	0.447	-2.035	-1.346	-0.253
-0.984	-0.797	0.254	-0.185	0.973	-0.795	1.158	-0.18	0.603	-0.502	-1.147	0.652	-1.352	-0.36	-0.158	-0.857	0.76	-0.809	0.494	1.075	-0.682	1.352	0.397	0.219	0.838	-0.734	0.925	-0.943	-2.021	1.014	-2.382	-0.607	-0.33	-1.359	1.353	-1.581	0.902	1.919	-1.196	2.334	0.637	0.339	1.476	-1.272	1.607
-1.149	-0.536	0.209	0.087	1.269	-0.312	1.04	-0.689	0.225	-0.777	-1.123	0.329	-1.393	0.126	0.092	-0.626	1.274	-0.26	0.783	1.119	-0.319	1.36	-0.08	0.045	0.601	-1.213	0.403	-1.337	-2.04	0.374	-2.483	0.079	0.011	-1.021	2.233	-0.629	1.386	2.016	-0.514	2.449	-0.243	-0.095	1.058	-2.149	0.564
-1.075	-0.568	-0.372	0.105	1.278	-0.086	0.982	-0.703	0.504	-0.74	-1.165	-0.123	-1.294	0.093	-0.566	-0.533	1.232	-0.407	0.737	1.181	0.248	1.288	-0.078	0.572	0.571	-1.247	0.383	-1.297	-2.074	-0.367	-2.22	0.168	-1.027	-0.96	2.151	-0.735	1.228	2.108	0.398	2.264	-0.111	0.974	0.957	-2.257	0.651
-1.09	-0.582	-0.438	0.048	1.247	0.258	1.078	-0.703	0.215	-0.676	-1.152	-0.472	-1.373	0.04	-0.352	-0.595	1.216	0.022	0.689	1.131	0.458	1.354	-0.09	0.46	0.686	-1.237	-0.034	-1.311	-1.97	-0.877	-2.43	0.182	-0.622	-1.069	2.184	0.082	1.18	2.041	0.851	2.375	-0.162	0.716	1.17	-2.183	-0.233
-0.892	-0.847	-0.455	-0.045	1.265	-0.327	0.917	-0.433	0.774	-0.532	-1.367	-0.089	-1.158	-0.238	-0.772	-0.606	1.091	-0.678	0.518	1.309	0.073	1.164	0.221	0.714	0.57	-1.052	0.732	-0.825	-2.32	-0.149	-2.073	-0.438	-1.346	-1.064	1.803	-1.322	0.973	2.276	0.075	2.097	0.484	1.294	0.936	-1.767	1.468
-0.867	-0.754	-0.607	-0.144	1.265	-0.091	0.967	-0.485	0.683	-0.471	-1.26	-0.333	-1.189	-0.147	-0.816	-0.658	1.124	-0.581	0.389	1.263	0.408	1.137	0.192	0.811	0.687	-1.113	0.477	-0.705	-2.342	-0.535	-1.91	-0.38	-1.457	-1.198	1.986	-1.014	0.688	2.24	0.732	1.984	0.359	1.391	1.245	-1.922	0.918
-0.861	-0.924	-0.175	-0.206	1.152	-0.558	1.031	-0.208	0.671	-0.392	-1.32	0.208	-1.225	-0.416	-0.559	-0.818	0.864	-0.757	0.415	1.31	-0.305	1.214	0.438	0.412	0.72	-0.827	0.856	-0.805	-2.268	0.539	-2.16	-0.9	-0.877	-1.387	1.571	-1.286	0.864	2.28	-0.467	2.205	0.76	0.798	1.37	-1.492	1.439
-1.091	0.206	-0.63	0.804	0.961	0.238	0.31	-1.202	0.365	-1.164	-0.523	-0.586	-0.901	0.907	-0.599	0.284	1.349	-0.088	1.236	0.454	0.538	0.918	-0.925	0.582	-0.318	-1.345	0.089	-2.055	-0.843	-0.969	-1.513	1.595	-1.178	0.452	2.444	-0.073	2.203	0.883	0.852	1.482	-1.649	1.164	-0.625	-2.347	0.267
-0.847	0.68	-0.741	0.962	0.65	0.62	-0.047	-1.26	0.026	-1.097	0.047	-0.918	-0.492	1.257	-0.487	0.693	1.223	0.299	1.136	0.009	0.846	0.52	-1.198	0.437	-0.599	-1.172	-0.404	-2.02	-0.104	-1.499	-0.934	2.114	-0.911	1.196	2.091	0.696	1.857	0.023	1.668	0.809	-2.116	0.957	-1.069	-2.174	-0.685
-0.177	0.367	-1.242	0.867	0.624	0.715	-0.557	-1.069	0.422	-0.619	-0.164	-1.283	0.307	0.848	-1.083	0.954	1.007	0.128	0.712	0.161	1.205	-0.194	-0.914	0.99	-0.845	-1.122	-0.207	-1.272	-0.308	-2.117	0.424	1.648	-1.766	1.529	1.948	0.312	1.013	0.236	2.255	-0.465	-1.497	1.805	-1.544	-1.845	-0.24
-0.149	0.391	-1.207	0.472	0.81	0.854	-0.291	-1.195	0.334	-0.379	-0.259	-1.277	0.11	0.998	-0.998	0.48	1.241	0.338	0.415	0.295	1.268	-0.075	-0.96	0.953	-0.474	-1.301	-0.331	-0.805	-0.482	-2.273	0.173	1.766	-1.794	0.8	2.217	0.613	0.723	0.421	2.297	-0.096	-1.66	1.782	-0.873	-2.276	-0.579
-0.743	0.819	-0.654	0.933	0.444	0.73	-0.222	-1.263	-0.098	-1.085	0.226	-0.887	-0.33	1.316	-0.346	0.703	1.047	0.51	1.065	-0.21	0.863	0.338	-1.305	0.331	-0.767	-1.074	-0.523	-1.898	0.457	-1.556	-0.436	2.319	-0.639	1.14	1.874	0.973	1.897	-0.387	1.514	0.691	-2.359	0.592	-1.319	-1.903	-0.832
-0.341	0.605	-1.096	0.914	0.499	0.735	-0.594	-1.092	0.339	-0.845	0.086	-1.161	0.201	1.056	-0.912	0.969	0.978	0.23	0.743	-0.033	1.152	-0.154	-1.049	0.915	-0.965	-1.01	-0.278	-1.495	0.23	-1.998	0.347	1.787	-1.63	1.807	1.654	0.462	1.395	-0.025	2.045	-0.291	-1.883	1.544	-1.711	-1.791	-0.37
0.46	0.808	-0.894	0.811	-0.673	0.765	-1.274	-0.144	0.089	-0.224	0.925	-1.086	1.087	0.592	-0.607	1.329	-0.326	0.432	0.209	-0.95	1.003	-1.09	-0.619	0.611	-1.317	0.359	-0.447	-0.307	1.636	-1.884	1.91	1.169	-1.029	2.386	-0.568	0.8	0.225	-1.613	1.866	-1.907	-1.121	1.145	-2.301	0.517	-0.803
1.274	-0.121	-0.118	-0.617	-0.516	0.994	-0.619	0.809	-0.796	1.183	0.289	-0.702	1.219	-0.488	0.488	0.004	-0.772	1.175	-1.167	-0.186	0.711	-1.183	0.62	-0.396	0.035	0.944	-1.087	2.129	0.189	-1.267	2.171	-0.934	0.779	0.045	-1.446	1.993	-2.129	-0.47	1.204	-2.168	0.893	-0.801	-0.139	1.362	-2.096
1.076	0.191	0.707	-1.132	-0.124	0.544	0.06	-0.025	-1.293	1.404	0.2	0.087	0.63	0.17	1.237	-0.748	-0.128	1.1	-1.385	-0.109	-0.086	-0.64	-0.095	-1.261	0.75	0.061	-1.177	2.473	0.343	0.238	1.081	0.177	2.24	-1.345	-0.221	1.996	-2.468	-0.158	-0.023	-1.043	-0.302	-2.236	1.29	0.063	-2.115
0.504	-0.178	1.192	-1.152	-0.471	-0.293	0.608	0.706	-0.849	1.062	0.134	0.917	-0.116	-0.456	1.346	-1.17	-0.65	0.373	-1.011	-0.24	-0.928	0.047	0.575	-1.273	1.094	0.773	-0.319	2.018	0.028	1.431	-0.265	-0.785	2.393	-1.954	-1.228	0.656	-1.808	-0.339	-1.62	0.074	1	-2.3	2.028	1.189	-0.677
-0.585	-0.149	1.127	-0.107	-0.924	-0.903	0.541	1.116	-0.247	-0.42	0.515	1.229	-0.706	-0.79	0.9	-0.436	-1.316	-0.417	0.208	-0.422	-1.292	0.671	0.795	-0.858	0.327	1.32	0.383	-0.479	0.962	2.233	-1.22	-1.531	1.49	-0.479	-2.413	-0.654	0.44	-0.746	-2.309	1.232	1.439	-1.506	0.862	2.189	0.8
-0.603	-0.322	1.127	-0.359	-0.534	-1.093	0.902	0.923	-0.029	-0.184	0.158	1.424	-0.961	-0.759	0.704	-0.849	-0.851	-0.674	0.164	-0.136	-1.394	0.915	0.831	-0.719	0.773	0.913	0.673	-0.204	0.189	2.544	-1.724	-1.365	1.228	-1.48	-1.604	-1.154	0.372	-0.422	-2.433	1.771	1.343	-1.212	1.407	1.702	1.016
0.896	-0.869	0.23	-1.236	-0.183	0.4	0.308	1.1	-0.58	1.366	-0.406	-0.066	0.316	-1.231	0.5	-0.993	-0.815	0.582	-1.342	0.481	0.181	-0.401	1.229	-0.503	0.977	0.857	-0.572	2.419	-0.765	-0.116	0.675	-2.167	0.893	-1.708	-1.494	1.018	-2.395	0.761	0.237	-0.659	2.122	-1.045	1.745	1.428	-1.108
0.557	-0.926	0.661	-1.289	0.065	-0.067	0.701	0.917	-0.538	1.145	-0.59	0.463	-0.1	-1.144	0.791	-1.235	-0.517	0.351	-1.204	0.649	-0.458	0.075	1.165	-0.761	1.245	0.569	-0.253	2.073	-1.18	0.766	-0.136	-2.063	1.379	-2.22	-0.9	0.563	-2.032	1.002	-1.019	0.164	2.039	-1.417	2.224	0.969	-0.403
-0.637	-0.172	1.083	-0.606	-0.105	-1.103	1.296	0.242	0.016	-0.032	-0.007	1.361	-1.163	-0.324	0.683	-1.127	-0.297	-0.68	-0.005	0.1	-1.399	1.224	0.277	-0.711	1.228	0.168	0.737	-0.114	-0.049	2.426	-2.106	-0.438	1.207	-2.069	-0.53	-1.207	-0.078	0.16	-2.515	2.089	0.688	-1.236	2.153	0.252	1.336
-0.914	0.31	0.814	-0.314	-0.425	-1.154	1.238	-0.02	0.383	-0.399	0.355	1.275	-1.335	0.215	0.261	-0.94	-0.144	-1	0.355	-0.673	-1.171	1.359	-0.214	-0.269	0.983	0.143	1.008	-0.589	0.704	2.273	-2.35	0.506	0.455	-1.71	-0.231	-1.77	0.551	-1.005	-2.151	2.357	-0.166	-0.616	1.718	0.51	1.705
-1.025	0.278	0.723	-0.119	-0.236	-1.269	1.141	0.057	0.505	-0.554	0.402	1.232	-1.369	0.137	0.14	-0.793	-0.141	-1.113	0.563	-0.281	-1.293	1.362	-0.08	-0.149	0.786	0.196	1.086	-1.088	0.642	2.162	-2.453	0.106	0.167	-1.415	-0.427	-1.921	1.083	-0.647	-2.193	2.42	-0.266	-0.049	1.459	0.36	1.933
-0.796	0.473	0.875	-0.24	0.251	-1.242	0.98	-0.75	0.37	-0.39	0.117	1.332	-1.118	0.765	0.32	-0.82	0.61	-1.037	0.352	-0.137	-1.313	1.116	-0.803	-0.319	0.726	-0.614	1.023	-0.79	0.177	2.312	-1.811	1.537	0.59	-1.323	1.051	-1.773	0.687	-0.217	-2.305	2.068	-1.286	-0.606	1.303	-1.2	1.776
-0.195	-0.243	1.267	-0.788	0.783	-0.64	0.938	-0.577	-0.647	0.341	-0.712	1.18	-0.719	0.248	1.21	-1.084	0.902	0.026	-0.403	0.577	-1.23	0.699	-0.245	-1.246	1.059	-0.857	0.014	0.73	-1.159	2.121	-1.253	0.408	2.133	-2.036	1.541	-0.044	-0.609	1.077	-2.135	1.346	-0.303	-2.063	1.927	-1.477	0.034
-0.075	-0.014	1.275	-0.8	0.748	-0.706	0.866	-0.743	-0.56	0.485	-0.473	1.251	-0.61	0.427	1.147	-1.079	0.964	-0.097	-0.447	0.456	-1.227	0.61	-0.428	-1.14	1.018	-0.968	0.086	0.612	-0.672	2.282	-1.045	0.855	2.076	-1.801	1.654	-0.213	-0.689	0.744	-2.257	1.124	-0.858	-2.046	1.82	-1.701	0.139
-1.151	-0.459	0.407	0.142	1.197	-0.474	1.024	-0.711	0.162	-0.772	-1.032	0.609	-1.403	0.172	0.187	-0.541	1.232	-0.384	0.809	1.023	-0.518	1.364	-0.178	-0.146	0.578	-1.153	0.476	-1.386	-1.879	0.923	-2.424	0.255	0.099	-1.039	2.194	-0.634	1.505	1.863	-0.86	2.373	-0.336	-0.227	0.937	-2.16	0.475
-0.762	0.705	0.778	0.063	0.3	-1.268	0.572	-1.044	0.47	-0.574	0.246	1.248	-0.882	1.078	0.226	-0.386	0.823	-1.117	0.492	-0.265	-1.289	0.76	-1.129	-0.177	0.289	-0.844	1.065	-0.719	0.549	2.267	-1.603	1.88	0.279	-0.608	1.493	-1.89	0.96	-0.392	-2.19	1.527	-1.982	-0.335	0.743	-1.457	1.914
-0.04	0.824	1.011	0.223	0.429	-1.18	-0.255	-1.255	0.197	-0.23	0.272	1.365	0.144	1.288	0.551	0.278	1.039	-0.864	0.149	-0.231	-1.357	-0.142	-1.329	-0.487	-0.371	-1.045	0.857	-0.366	0.388	2.411	0.343	2.3	0.855	0.468	1.872	-1.58	0.207	-0.426	-2.429	-0.072	-2.298	-0.84	-0.409	-1.829	1.517
-0.076	1.073	0.698	-0.697	-0.032	-1.073	0.71	-1.008	0.383	0.392	0.739	1.114	-0.55	1.295	0.2	-0.954	0.595	-0.89	-0.38	-0.65	-1.125	0.499	-1.297	-0.206	0.845	-0.606	0.928	0.695	1.135	2.044	-0.769	2.336	0.334	-1.554	0.991	-1.67	-0.558	-1.179	-2.02	0.915	-2.261	-0.413	1.42	-1.098	1.705
0.395	1.237	0.109	-1.266	-0.333	0.026	0.865	-0.899	-0.154	1.048	0.987	0.02	-0.305	1.344	0.186	-1.349	0.368	0.056	-1.046	-0.997	-0.02	0.293	-1.332	-0.16	1.342	-0.36	-0.129	1.828	1.794	0.044	-0.489	2.377	0.312	-2.36	0.637	0.111	-1.812	-1.756	0.123	0.513	-2.405	-0.288	2.338	-0.658	-0.256
0.881	0.9	0.077	-1.067	0.114	0.729	0.175	-0.991	-0.802	1.19	0.532	-0.453	0.466	1.162	0.597	-0.788	0.734	0.948	-1.224	-0.517	0.439	-0.488	-1.161	-0.573	0.82	-0.696	-0.948	2.121	1.008	-0.71	0.92	2.048	0.99	-1.327	1.22	1.747	-2.256	-0.866	0.556	-0.743	-2.135	-0.955	1.31	-1.328	-1.637
-0.024	1.303	-0.024	-0.893	-0.636	0.628	0.886	-0.668	-0.593	0.55	1.227	-0.397	-0.6	1.244	0.358	-1.141	0.027	0.699	-0.547	-1.229	0.47	0.579	-1.267	-0.307	1.085	-0.004	-0.796	1.168	2.109	-0.675	-1.192	2.109	0.521	-2.054	0.031	1.328	-0.909	-2.147	0.96	1.087	-2.148	-0.694	1.973	0.048	-1.467
0.521	1.146	0.157	-1.178	-0.246	0.508	0.637	-0.896	-0.633	1.035	0.875	-0.208	-0.051	1.283	0.508	-1.157	0.417	0.735	-1.075	-0.875	0.226	0.057	-1.272	-0.5	1.144	-0.419	-0.684	1.859	1.513	-0.384	-0.124	2.376	0.86	-1.993	0.747	1.307	-1.839	-1.637	0.373	0.139	-2.277	-0.986	2.006	-0.731	-1.248
1.015	0.56	-0.58	-0.97	0.722	0.426	-0.05	-1.292	0.174	1.228	-0.118	-0.607	0.698	1.18	-0.483	-0.564	1.258	0.177	-1.278	0.101	0.62	-0.664	-1.198	0.462	0.566	-1.248	-0.125	2.146	-0.23	-1.16	1.124	2.029	-0.846	-0.908	2.287	0.388	-2.205	0.178	1.112	-1.201	-2.049	0.764	1.058	-2.189	-0.305
0.307	0.299	-1.212	-0.833	0.752	0.692	0.536	-1.05	0.531	0.721	-0.262	-1.193	-0.132	0.832	-1.086	-0.866	1.128	0.089	-0.715	0.291	1.218	0.143	-0.844	1.083	0.873	-1.142	-0.084	1.19	-0.485	-2.116	-0.264	1.418	-2.027	-1.461	2.08	0.133	-1.218	0.441	2.167	0.196	-1.411	1.976	1.532	-2.047	-0.161
0.406	-0.164	-1.183	-0.681	1.064	0.29	0.207	-0.94	0.88	0.696	-0.741	-0.921	0.06	0.422	-1.318	-0.614	1.222	-0.388	-0.686	0.78	0.933	-0.167	-0.511	1.267	0.551	-1.268	0.394	1.28	-1.294	-1.587	0.194	0.852	-2.295	-1.026	2.176	-0.633	-1.07	1.435	1.614	-0.099	-0.83	2.344	0.882	-2.243	0.591
0.225	0.262	-1.253	-0.285	0.935	0.823	0.008	-1.206	0.437	0.259	-0.441	-1.297	0.16	0.938	-1.068	-0.175	1.319	0.249	-0.363	0.444	1.3	-0.187	-0.941	1.054	0.183	-1.34	-0.221	0.563	-0.786	-2.293	0.261	1.631	-1.892	-0.32	2.353	0.522	-0.649	0.785	2.286	-0.124	-1.587	1.863	0.39	-2.376	-0.503
-0.326	0.052	-1.227	-0.201	1.032	0.739	0.564	-1.069	0.459	-0.08	-0.609	-1.231	-0.528	0.709	-1.084	-0.458	1.318	0.167	0.082	0.64	1.224	0.542	-0.695	1.043	0.53	-1.326	-0.187	-0.138	-1.089	-2.271	-1.039	1.251	-1.844	-0.82	2.352	0.272	0.099	0.974	2.252	1.031	-1.18	1.921	0.78	-2.345	-0.264
0.148	-1.028	-0.817	-0.591	1.075	-0.376	0.452	-0.101	1.185	0.478	-1.35	-0.272	-0.19	-0.597	-1.274	-0.61	0.746	-1.001	-0.501	1.281	0.289	0.203	0.557	1.282	0.641	-0.766	0.957	0.844	-2.369	-0.448	-0.456	-0.985	-2.246	-1.118	1.341	-1.746	-0.909	2.264	0.525	0.392	1.043	2.174	1.226	-1.165	1.76
0.738	-0.948	0.441	-0.567	-0.1	-1.174	-0.16	1.043	0.751	0.836	-0.511	1.02	0.555	-1.274	-0.186	-0.258	-0.724	-1.209	-0.816	0.529	-1.007	-0.565	1.253	0.198	0.274	0.715	1.227	1.446	-0.981	1.712	1.037	-2.244	-0.252	-0.41	-1.233	-2.122	-1.426	0.972	-1.805	-1.101	2.204	0.324	0.427	1.294	2.099
0.809	-0.997	0.226	-1.037	-0.119	-0.765	0.197	1.1	0.56	1.137	-0.539	0.66	0.387	-1.344	-0.231	-0.769	-0.768	-0.808	-1.193	0.541	-0.626	-0.379	1.291	0.231	0.745	0.781	0.824	2.011	-0.977	1.12	0.738	-2.349	-0.404	-1.315	-1.385	-1.578	-2.087	1.014	-1.079	-0.635	2.287	0.424	1.361	1.448	1.467
-0.292	-1.236	0.225	-0.503	0.605	-1.028	0.802	0.647	0.785	0.148	-1.153	0.787	-0.683	-1.186	-0.378	-0.824	-0.013	-1.134	-0.138	1.163	-0.798	0.729	1.186	0.372	0.785	0.041	1.11	0.137	-1.991	1.48	-1.302	-2.063	-0.549	-1.46	-0.047	-2.014	-0.077	1.972	-1.504	1.231	2.076	0.626	1.453	0.016	2.003
-0.171	-1.25	-0.207	-0.359	0.837	-0.917	0.334	0.433	1.181	0.059	-1.322	0.47	-0.424	-1.038	-0.845	-0.568	0.28	-1.299	-0.132	1.301	-0.426	0.291	1.075	0.89	0.309	-0.25	1.345	0.336	-2.324	0.644	-0.403	-1.846	-1.521	-0.834	0.481	-2.282	-0.094	2.299	-0.86	0.775	1.867	1.492	0.685	-0.522	2.391
-0.367	-1.234	0.087	-0.744	0.876	-0.507	1.133	0.374	0.493	0.259	-1.306	0.355	-0.948	-1.024	-0.181	-1.167	0.32	-0.642	-0.229	1.343	-0.307	0.935	1.01	0.32	1.202	-0.303	0.629	0.427	-2.312	0.548	-1.704	-1.801	-0.379	-2.054	0.495	-1.246	-0.522	2.339	-0.534	1.644	1.824	0.405	2.157	-0.584	1.032
-0.744	-0.759	-0.785	-0.251	1.265	0.137	1.018	-0.505	0.577	-0.318	-1.301	-0.577	-1.078	-0.132	-0.924	-0.792	1.119	-0.31	0.32	1.272	0.558	1.128	0.157	0.783	0.794	-1.11	0.299	-0.62	-2.299	-0.848	-1.964	-0.22	-1.552	-1.321	2.022	-0.547	0.452	2.166	1.117	1.929	0.253	1.526	1.471	-1.926	0.475
-0.021	-0.965	-0.846	0.247	1.167	-0.422	-0.161	-0.208	1.261	-0.096	-1.348	-0.261	0.079	-0.469	-1.338	0.165	0.9	-1.052	0.313	1.294	0.253	-0.012	0.474	1.316	-0.294	-0.866	1.065	-0.401	-2.373	-0.498	0.053	-0.912	-2.311	0.302	1.646	-1.797	0.39	2.357	0.42	-0.019	0.903	2.318	-0.48	-1.606	1.884
0.347	-1.087	-0.604	-0.519	0.958	-0.648	0.149	0.128	1.248	0.441	-1.303	0.035	0.21	-0.751	-1.171	-0.389	0.533	-1.196	-0.592	1.273	-0.024	-0.176	0.773	1.149	0.45	-0.529	1.196	0.881	-2.324	0.009	0.329	-1.28	-2.09	-0.737	0.945	-2.125	-0.987	2.274	-0.067	-0.293	1.323	2.132	0.862	-0.935	2.151
0.706	-1.028	0.205	-0.867	0.038	-0.958	0.129	0.984	0.806	0.969	-0.656	0.733	0.347	-1.285	-0.327	-0.672	-0.627	-1.051	-0.969	0.702	-0.757	-0.426	1.239	0.462	0.676	0.612	1.065	1.846	-1.137	1.152	0.724	-2.284	-0.703	-1.083	-1.123	-1.934	-1.76	1.21	-1.27	-0.808	2.163	0.825	1.156	1.188	1.805
0.022	-1.05	0.775	-0.026	-0.189	-1.263	0.026	1.196	0.482	-0.024	-0.546	1.254	0.075	-1.443	0.205	-0.084	-0.869	-1.08	0.033	0.506	-1.304	-0.007	1.385	-0.193	0.061	0.864	1.103	-0.046	-0.892	2.317	0.018	-2.52	0.317	-0.015	-1.514	-1.964	-0.054	0.947	-2.262	0.02	2.459	-0.238	0.024	1.623	1.844
-0.923	-0.503	0.72	0.187	-0.427	-1.192	0.788	0.879	0.479	-0.724	-0.005	1.189	-1.024	-0.944	0.163	-0.316	-0.872	-1.003	0.685	0.055	-1.241	1.031	0.881	-0.177	0.47	0.763	1.086	-1.226	-0.072	2.157	-1.792	-1.607	0.326	-0.683	-1.491	-1.823	1.107	0.182	-2.234	1.786	1.616	-0.311	0.687	1.494	1.867
-0.818	-0.551	0.795	0.872	-0.741	-0.632	0.109	1.311	-0.044	-1.013	0.1	0.922	-0.511	-1.139	0.589	0.512	-1.298	-0.393	1.163	-0.107	-0.78	0.702	1.191	-0.416	-0.47	1.294	0.361	-1.92	0.118	1.461	-1.061	-1.991	1.066	0.658	-2.264	-0.805	1.9	-0.152	-1.532	1.027	2.109	-0.936	-0.988	2.137	0.463
-0.628	1.14	-0.056	-0.476	-0.991	0.684	1.082	-0.163	-0.637	-0.128	1.354	-0.479	-1.058	0.807	0.377	-0.999	-0.538	0.836	0.099	-1.335	0.451	1.074	-0.817	-0.408	0.96	0.496	-0.8	-0.173	2.322	-0.903	-1.906	1.38	0.662	-1.802	-0.915	1.44	0.219	-2.364	0.884	1.978	-1.315	-0.679	1.736	0.924	-1.382
-0.163	1.22	0.38	-1.019	-0.799	-0.117	1.184	-0.416	-0.359	0.518	1.302	0.275	-0.823	1.007	0.417	-1.389	-0.298	0.229	-0.535	-1.214	-0.461	0.862	-1.018	-0.57	1.371	0.234	-0.116	0.868	2.312	0.623	-1.453	1.69	0.945	-2.415	-0.53	0.5	-0.977	-2.089	-0.765	1.522	-1.818	-0.905	2.452	0.421	-0.173
-0.179	0.388	1.203	-0.901	-0.714	-0.586	1.03	0.407	-0.655	0.451	0.673	1.144	-0.799	0.072	1.12	-1.285	-0.636	0.002	-0.436	-0.682	-1.118	0.782	-0.03	-1.187	1.17	0.793	-0.05	0.849	1.087	2.04	-1.315	0.044	2.056	-2.116	-1.328	-0.011	-0.649	-1.414	-1.822	1.28	-0.061	-2.17	2.067	1.482	-0.005
0.39	0.695	1.036	-1.113	-0.671	0.065	0.738	-0.087	-1.037	0.932	0.853	0.621	-0.191	0.443	1.354	-1.126	-0.425	0.75	-0.962	-0.854	-0.617	0.255	-0.505	-1.276	1.128	0.338	-0.68	1.69	1.57	0.983	-0.443	0.939	2.254	-2.096	-0.634	1.236	-1.768	-1.455	-1.152	0.513	-0.775	-2.29	2.068	0.505	-1.183
-0.346	0.907	0.836	-0.798	-0.915	-0.386	1.197	-0.001	-0.439	0.335	1.063	0.834	-0.981	0.654	0.74	-1.236	-0.524	-0.004	-0.262	-1.204	-0.731	1.013	-0.594	-0.757	1.257	0.583	-0.056	0.522	1.897	1.485	-1.756	1.078	1.364	-2.187	-0.948	0.012	-0.563	-2.107	-1.225	1.683	-0.967	-1.409	2.175	1.069	-0.251
0.182	0.012	1.295	-1.167	-0.256	-0.492	1.034	0.143	-0.774	0.877	0.128	1.114	-0.523	-0.124	1.328	-1.344	-0.37	0.188	-0.856	-0.132	-1.11	0.546	0.053	-1.245	1.417	0.204	-0.205	1.467	0.356	2.019	-0.987	-0.097	2.327	-2.414	-0.381	0.248	-1.503	-0.257	-1.948	0.878	0.084	-2.347	2.443	0.537	-0.367
0.406	0.349	1.158	-1.264	-0.194	-0.196	0.874	-0.152	-0.968	1.053	0.352	0.849	-0.285	0.319	1.33	-1.307	-0.04	0.478	-1.081	-0.322	-0.847	0.286	-0.329	-1.321	1.372	0.026	-0.502	1.876	0.519	1.572	-0.551	0.489	2.378	-2.286	-0.255	0.821	-1.895	-0.438	-1.494	0.452	-0.52	-2.339	2.366	0.2	-0.926
-0.034	-0.206	1.309	-1.019	0.483	-0.613	1.028	-0.31	-0.658	0.605	-0.423	1.219	-0.675	0.027	1.254	-1.299	0.49	0.057	-0.632	0.416	-1.203	0.644	-0.111	-1.197	1.3	-0.479	-0.04	1.181	-0.674	2.119	-1.211	0.068	2.217	-2.237	1.005	-0.005	-1.073	0.673	-2.174	1.107	-0.128	-2.204	2.291	-0.863	-0.042
0.082	-0.783	1.024	-1.174	0.213	-0.545	1.051	0.581	-0.417	0.767	-0.64	1.016	-0.619	-0.857	0.914	-1.442	-0.179	-0.019	-0.782	0.592	-0.994	0.588	0.872	-0.884	1.393	0.237	0.114	1.409	-0.979	1.797	-1.059	-1.426	1.669	-2.47	-0.329	-0.126	-1.333	0.909	-1.884	1.06	1.486	-1.621	2.488	0.313	0.018
-0.286	-0.784	0.984	-0.533	1.164	-0.07	0.874	-0.341	-0.857	0.244	-1.146	0.743	-0.77	-0.326	1.124	-0.877	0.92	0.499	-0.113	1.282	-0.62	0.689	0.256	-1.15	0.958	-0.895	-0.463	0.328	-2.148	1.197	-1.44	-0.572	1.977	-1.662	1.592	0.707	-0.297	2.235	-1.092	1.353	0.418	-2.012	1.588	-1.615	-0.912
0.626	-1.077	0.299	-1.145	0.234	0.514	0.511	0.804	-0.837	1.108	-0.858	-0.177	0.073	-1.191	0.724	-1.012	-0.357	0.866	-1.153	0.794	0.1	-0.111	1.174	-0.715	1.075	0.347	-0.856	2.056	-1.318	-0.098	0.041	-2.093	1.294	-1.788	-0.665	1.525	-2.001	1.507	0.233	-0.119	2.051	-1.352	1.831	0.611	-1.545
0.955	-0.798	0.319	-1.157	-0.488	-0.256	0.235	1.286	-0.121	1.329	-0.197	0.296	0.474	-1.309	0.289	-0.82	-1.112	-0.131	-1.362	0.189	-0.355	-0.472	1.336	-0.264	0.928	1.095	0.029	2.369	-0.369	0.653	0.819	-2.289	0.621	-1.584	-1.934	-0.19	-2.305	0.33	-0.615	-0.925	2.263	-0.478	1.548	1.998	0.144
0.315	-1.209	0.294	-1.266	0.378	0.043	0.913	0.801	-0.372	0.981	-1.004	0.14	-0.395	-1.277	0.408	-1.369	-0.286	0.248	-1.026	0.988	-0.176	0.372	1.239	-0.445	1.347	0.269	-0.259	1.791	-1.773	0.355	-0.638	-2.268	0.7	-2.372	-0.408	0.511	-1.78	1.811	-0.268	0.705	2.227	-0.658	2.383	0.481	-0.555
0.959	-0.791	-0.333	-0.293	0.991	-0.737	-0.57	-0.148	1.136	0.797	-1.093	0.277	1.029	-0.389	-0.897	0.239	0.749	-1.151	-0.775	1.139	-0.23	-0.926	0.418	0.96	-0.137	-0.701	1.2	1.364	-1.983	0.513	1.663	-0.787	-1.719	0.362	1.158	-2.117	-1.553	1.95	-0.456	-1.69	0.84	1.568	-0.372	-1.301	2.053
-0.581	-1.154	-0.228	0.01	0.969	-0.917	0.672	0.146	1.109	-0.348	-1.341	0.407	-0.726	-0.85	-0.841	-0.375	0.503	-1.312	0.42	1.319	-0.432	0.863	0.779	0.837	0.406	-0.503	1.255	-0.772	-2.329	0.778	-1.432	-1.373	-1.503	-0.788	0.929	-2.182	0.506	2.381	-0.718	1.434	1.413	1.527	0.814	-0.928	2.183
-0.676	-1.05	0.162	-0.326	0.788	-0.938	1.012	0.284	0.751	-0.249	-1.159	0.703	-1.021	-0.83	-0.404	-0.84	0.309	-1.104	0.228	1.178	-0.67	1.1	0.874	0.343	0.807	-0.321	1.075	-0.529	-1.954	1.351	-1.795	-1.478	-0.73	-1.552	0.56	-1.885	0.429	2.067	-1.187	1.966	1.393	0.635	1.456	-0.641	1.874
-0.845	-0.901	-0.312	-0.024	1.189	-0.519	0.896	-0.278	0.799	-0.468	-1.325	0.1	-1.117	-0.375	-0.701	-0.616	0.927	-0.86	0.572	1.315	-0.113	1.105	0.395	0.706	0.586	-0.913	0.793	-0.918	-2.304	0.285	-2.036	-0.699	-1.183	-1	1.671	-1.574	0.887	2.328	-0.233	1.98	0.576	1.276	1.024	-1.596	1.504
-0.76	-1.001	0.247	-0.142	0.619	-1.111	0.966	0.293	0.762	-0.335	-1.062	0.82	-1.088	-0.838	-0.375	-0.685	0.143	-1.232	0.42	1.006	-0.874	1.104	0.766	0.279	0.735	-0.225	1.14	-0.683	-1.825	1.537	-1.982	-1.389	-0.462	-1.237	0.461	-2.037	0.725	1.839	-1.573	1.8	1.542	0.688	1.226	-0.418	2.09
0.087	-1.294	0.049	-0.501	0.561	-1.043	0.503	0.737	0.921	0.361	-1.197	0.694	-0.171	-1.248	-0.615	-0.603	-0.13	-1.253	-0.328	1.185	-0.726	0.299	1.278	0.527	0.652	0.12	1.2	0.513	-2.06	1.287	-0.542	-2.231	-0.968	-1.222	-0.197	-2.085	-0.622	2.109	-1.275	0.54	2.239	1.008	1.122	0.132	2.205
0.484	-0.939	0.731	-0.307	-0.236	-1.233	-0.26	1.163	0.486	0.479	-0.451	1.268	0.423	-1.329	0.106	-0.108	-0.878	-1.099	-0.498	0.44	-1.23	-0.552	1.286	-0.143	0.061	0.904	1.059	0.928	-0.736	2.218	0.84	-2.307	0.285	-0.007	-1.615	-1.872	-0.7	0.738	-2.219	-0.948	2.272	-0.146	0.083	1.676	1.771
0.853	-0.842	0.476	-0.672	-0.333	-1.033	-0.158	1.155	0.573	0.969	-0.338	0.982	0.636	-1.252	-0.071	-0.399	-0.961	-0.939	-0.867	0.321	-1.006	-0.583	1.272	0.01	0.299	0.911	1.063	1.729	-0.637	1.607	1.169	-2.175	-0.156	-0.623	-1.647	-1.786	-1.645	0.68	-1.715	-1.193	2.211	0.127	0.506	1.617	1.884
0.419	-1.219	-0.045	-0.988	0.36	-0.685	0.555	0.866	0.753	0.883	-0.981	0.425	-0.1	-1.32	-0.511	-0.93	-0.299	-0.926	-0.933	0.973	-0.365	0.021	1.301	0.566	1.025	0.342	0.866	1.624	-1.735	0.709	-0.127	-2.353	-0.852	-1.686	-0.482	-1.664	-1.643	1.75	-0.643	0.025	2.256	0.952	1.84	0.547	1.443
-0.406	-1.17	0.111	0.248	0.507	-1.187	0.256	0.689	1.03	-0.406	-1.021	0.809	-0.357	-1.182	-0.611	0.078	-0.125	-1.414	0.409	1.097	-0.826	0.447	1.189	0.537	0.063	0.103	1.394	-0.61	-1.856	1.429	-0.788	-2.114	-0.924	0.057	-0.355	-2.481	0.557	1.872	-1.496	0.611	2.181	1.074	-0.061	0.211	2.509
-0.404	-0.985	-0.712	0.783	0.89	-0.503	-0.284	0.071	1.259	-0.701	-1.192	-0.121	-0.05	-0.674	-1.224	0.704	0.499	-1.089	0.804	1.169	0.156	0.116	0.659	1.273	-0.647	-0.519	1.107	-1.344	-2.072	-0.158	-0.148	-1.134	-2.215	1.055	0.943	-2.054	1.218	2.173	0.169	0.147	1.013	2.235	-1.154	-0.865	1.921
-0.584	-1.072	0.325	-0.167	0.494	-1.195	0.827	0.548	0.801	-0.23	-0.987	0.907	-0.85	-1.044	-0.301	-0.627	-0.038	-1.278	0.312	0.966	-0.993	0.919	1.031	0.284	0.654	0.001	1.218	-0.579	-1.703	1.663	-1.635	-1.793	-0.497	-1.102	-0.089	-2.212	0.533	1.799	-1.595	1.58	1.849	0.538	1.025	0.009	2.266
-0.767	-0.672	0.809	-0.399	1.171	-0.422	1.155	-0.453	-0.372	-0.217	-1.114	0.786	-1.233	-0.142	0.745	-0.984	1.054	-0.039	0.233	1.158	-0.765	1.205	0.125	-0.789	0.969	-0.971	0.098	-0.392	-2.021	1.431	-2.137	-0.379	1.228	-1.772	1.859	0.058	0.41	2.035	-1.379	2.174	0.136	-1.386	1.742	-1.74	0.011
-0.217	-0.577	1.106	-0.977	0.345	-0.779	1.204	0.138	-0.371	0.475	-0.632	1.142	-0.876	-0.46	0.94	-1.375	0.104	-0.26	-0.48	0.533	-1.221	0.92	0.415	-0.922	1.36	-0.181	0.218	0.763	-1.065	2.067	-1.591	-0.815	1.701	-2.407	0.227	-0.282	-0.726	1.1	-2.18	1.503	0.911	-1.709	2.434	-0.138	0.508
-0.069	-1.267	0.322	-0.533	0.442	-1.082	0.65	0.833	0.777	0.289	-1.076	0.913	-0.402	-1.32	-0.303	-0.701	-0.238	-1.141	-0.293	1.085	-0.896	0.475	1.356	0.332	0.743	0.212	1.137	0.419	-1.905	1.55	-0.85	-2.259	-0.494	-1.233	-0.462	-2.062	-0.703	1.785	-1.61	0.935	2.332	0.565	1.32	0.49	2.008
-0.327	-0.59	1.053	-0.817	0.724	-0.652	1.2	-0.144	-0.422	0.342	-0.849	1.039	-0.953	-0.266	0.948	-1.233	0.554	-0.13	-0.291	0.813	-1.113	0.984	0.308	-0.933	1.284	-0.584	0.137	0.622	-1.473	1.833	-1.807	-0.474	1.675	-2.258	0.944	-0.158	-0.678	1.465	-1.882	1.743	0.483	-1.669	2.244	-0.923	0.253
0.649	-0.462	0.988	-1.272	0.124	0.085	0.636	0.411	-1.062	1.183	-0.326	0.538	0.039	-0.526	1.323	-1.177	-0.11	0.757	-1.22	0.347	-0.588	-0.011	0.494	-1.275	1.217	0.294	-0.728	2.095	-0.796	1.014	0.114	-0.989	2.314	-2.091	-0.143	1.319	-2.21	0.54	-1.121	-0.096	0.816	-2.306	2.157	0.4	-1.247
-0.5	-1.012	0.711	-0.504	1.155	0.091	1.022	-0.212	-0.791	0.033	-1.402	0.405	-0.97	-0.523	0.943	-0.961	0.853	0.564	0.013	1.329	-0.386	0.965	0.466	-0.933	0.961	-0.887	-0.566	0.023	-2.34	0.682	-1.78	-0.873	1.627	-1.718	1.495	0.905	-0.003	2.351	-0.672	1.688	1.011	-1.562	1.748	-1.481	-1.007
-0.122	-1.213	0.429	-0.538	0.994	0.643	0.607	0.21	-1.114	0.234	-1.385	-0.158	-0.464	-0.904	0.954	-0.739	0.495	1.078	-0.287	1.38	0.134	0.473	0.884	-0.958	0.658	-0.493	-1.15	0.267	-2.512	-0.257	-0.683	-1.545	1.841	-1.28	0.815	1.968	-0.387	2.509	0.197	0.974	1.557	-1.643	1.232	-0.804	-2.005
-1.238	0.293	-0.152	0.708	0.595	0.864	0.509	-0.882	-0.729	-1.245	-0.209	-0.641	-1.093	0.763	0.348	0.153	0.975	0.966	1.191	0.148	0.659	1.082	-0.756	-0.384	-0.14	-0.907	-0.988	-2.224	-0.369	-1.133	-1.889	1.328	0.706	0.139	1.648	1.8	2.124	0.34	1.158	1.996	-1.291	-0.741	-0.096	-1.669	-1.751
0.065	-0.861	-0.965	-1.111	0.668	0.196	0.98	0.111	0.762	0.711	-0.989	-0.74	-0.593	-0.647	-1.077	-1.372	0.292	-0.359	-0.739	0.956	0.723	0.588	0.629	1.049	1.25	-0.434	0.386	1.247	-1.766	-1.236	-0.98	-0.969	-2.037	-2.388	0.621	-0.575	-1.148	1.765	1.301	1.137	1.248	1.742	2.288	-0.705	0.824
0.043	-1.211	-0.477	-1.01	0.69	-0.275	0.952	0.493	0.708	0.685	-1.18	-0.192	-0.61	-1.109	-0.721	-1.219	0.117	-0.655	-0.685	1.183	0.119	0.552	1.074	0.788	1.241	-0.15	0.555	1.322	-2.02	-0.305	-1.103	-1.98	-1.152	-2.175	0.243	-1.069	-1.217	2.098	0.352	1.012	1.911	1.369	2.196	-0.187	0.91
0.639	-1.066	-0.367	-1.152	0.314	-0.573	0.566	0.808	0.79	1.182	-0.858	0.053	0.042	-1.145	-0.766	-1.054	-0.261	-0.911	-1.117	0.865	-0.204	-0.009	1.224	0.662	1.083	0.308	0.811	1.99	-1.56	0.258	-0.057	-2.106	-1.242	-1.97	-0.554	-1.49	-1.914	1.466	-0.013	0.008	2.069	1.29	1.817	0.552	1.553
0.374	-1.236	0.161	-0.695	0.329	-1.024	0.424	0.881	0.817	0.671	-1.023	0.726	0.053	-1.31	-0.43	-0.649	-0.333	-1.195	-0.658	0.95	-0.743	0.151	1.345	0.384	0.673	0.313	1.151	1.013	-1.778	1.375	0.01	-2.336	-0.738	-1.136	-0.596	-2.116	-1.246	1.755	-1.238	0.123	2.397	0.713	0.993	0.616	2.112
-0.413	-1.154	0.343	-0.876	0.944	-0.126	1.259	0.246	-0.224	0.278	-1.314	0.251	-1.072	-0.861	0.382	-1.376	0.469	0.052	-0.274	1.316	-0.278	1.058	0.916	-0.373	1.315	-0.442	-0.054	0.656	-2.331	0.604	-1.854	-1.553	0.708	-2.431	0.78	0.008	-0.544	2.327	-0.585	1.882	1.52	-0.75	2.362	-0.828	0.034
-1.172	-0.319	0.332	0.276	1.113	-0.574	0.961	-0.788	0.333	-0.87	-0.933	0.569	-1.343	0.326	0.079	-0.416	1.171	-0.564	0.957	0.929	-0.511	1.381	-0.252	0.081	0.445	-1.226	0.562	-1.556	-1.635	0.877	-2.353	0.621	-0.011	-0.766	2.084	-0.974	1.457	1.66	-1.038	2.37	-0.537	0.112	0.693	-2.208	0.818
-0.523	0.474	-1.087	1.054	0.501	0.467	-0.643	-0.879	0.689	-1.069	0.032	-0.922	0.05	0.869	-1.11	1.057	0.887	-0.149	0.921	0.076	1.034	-0.101	-0.83	1.114	-1.122	-0.807	0.197	-1.723	0.098	-1.804	0.37	1.41	-2.059	1.912	1.458	-0.221	1.74	-0.002	1.753	-0.148	-1.61	1.865	-1.888	-1.58	0.303
-1.137	0.419	-0.459	1.042	0.067	-0.704	0.023	-0.376	1.231	-1.408	0.232	0.155	-0.748	0.577	-1.004	0.605	0.343	-1.197	1.361	-0.199	-0.119	0.715	-0.439	1.091	-0.694	-0.252	1.237	-2.482	0.277	0.166	-1.183	0.907	-1.91	1.107	0.509	-2.188	2.38	-0.478	-0.295	1.416	-0.925	1.863	-1.069	-0.551	2.203
-1.183	0.377	-0.394	1.032	0.674	-0.369	0.153	-1.08	0.754	-1.403	-0.195	-0.028	-0.831	0.902	-0.714	0.533	1.086	-0.711	1.415	0.173	0	0.848	-0.927	0.731	-0.558	-1.111	0.7	-2.466	-0.257	0.001	-1.473	1.553	-1.333	0.98	1.928	-1.133	2.458	0.471	0.076	1.483	-1.637	1.217	-0.986	-1.986	1.192
-0.599	0.233	-1.105	0.67	0.945	0.557	-0.139	-1.148	0.529	-0.814	-0.434	-1.043	-0.322	0.867	-1.043	0.556	1.298	-0.028	0.686	0.507	1.077	0.251	-0.869	1.044	-0.518	-1.299	-0.055	-1.529	-0.734	-1.854	-0.414	1.578	-1.837	1.15	2.187	-0.089	1.367	0.718	1.957	0.469	-1.539	1.861	-0.883	-2.281	0.01
-0.155	-0.009	-1.274	0.494	1.032	0.603	-0.325	-1.008	0.705	-0.409	-0.655	-1.196	0.121	0.631	-1.21	0.517	1.296	-0.016	0.422	0.651	1.173	-0.031	-0.652	1.235	-0.587	-1.235	0.096	-0.741	-1.167	-2.078	0.171	1.225	-2.159	0.794	2.298	-0.238	0.771	1.145	2.028	-0.022	-1.26	2.172	-1.006	-2.277	0.193
-0.699	0.356	-0.991	1.232	0.456	0.148	-0.528	-0.822	0.885	-1.189	-0.089	-0.748	-0.13	0.77	-1.115	1.123	0.83	-0.434	1.203	0.032	0.723	0.078	-0.725	1.183	-1.074	-0.841	0.489	-2.099	-0.184	-1.324	-0.227	1.264	-2.08	1.9	1.492	-0.906	2.191	0.015	1.284	0.127	-1.055	2.169	-1.903	-1.51	0.759
-0.822	0.304	-0.896	1.032	0.737	0.257	-0.169	-1.088	0.751	-1.165	-0.255	-0.668	-0.375	0.816	-1.02	0.754	1.154	-0.267	1.201	0.228	0.766	0.451	-0.952	1.074	-0.768	-1.101	0.38	-2.121	-0.33	-1.218	-0.756	1.497	-1.808	1.266	2.107	-0.569	2.093	0.471	1.245	0.849	-1.639	1.747	-1.428	-1.995	0.338
-1.228	-0.293	-0.135	0.556	1.022	-0.652	0.655	-0.638	0.9	-1.129	-0.827	0.342	-1.188	0.281	-0.574	-0.08	1.068	-0.988	1.124	0.882	-0.23	1.191	-0.231	0.695	0.044	-0.959	1.023	-1.974	-1.491	0.455	-2.13	0.425	-1.168	-0.133	1.843	-1.717	2.062	1.309	-0.617	2.137	-0.489	1.143	0.075	-1.811	1.636
-1.079	-0.666	-0.278	0.236	1.103	-0.536	0.855	-0.484	0.841	-0.833	-1.158	0.182	-1.206	-0.11	-0.691	-0.366	0.985	-0.871	0.819	1.092	-0.143	1.227	0.086	0.723	0.386	-1.007	0.863	-1.535	-1.949	0.242	-2.038	-0.157	-1.357	-0.645	1.765	-1.552	1.34	1.981	-0.201	2.12	0.276	1.276	0.73	-1.805	1.529
-0.633	1.119	-0.253	1.271	-0.031	0.006	-0.663	-1.073	0.173	-1.238	0.713	-0.124	0.044	1.401	-0.361	1.257	0.627	-0.184	1.131	-0.688	0.177	-0.046	-1.379	0.226	-1.205	-0.637	0.092	-2.2	1.237	-0.1	0.097	2.469	-0.649	2.241	1.127	-0.16	2.132	-1.19	0.409	-0.084	-2.46	0.372	-2.13	-1.219	0.303
-0.158	0.732	-1.043	0.952	0.191	0.789	-0.877	-0.877	0.275	-0.707	0.309	-1.176	0.406	1.066	-0.795	1.12	0.691	0.354	0.656	-0.315	1.148	-0.514	-0.95	0.851	-1.157	-0.693	-0.333	-1.197	0.656	-2.067	0.715	1.867	-1.392	2.078	1.189	0.581	1.337	-0.739	1.912	-0.743	-1.754	1.501	-1.994	-1.329	-0.585
0.059	0.043	-1.254	0.96	0.492	0.71	-1.065	-0.502	0.583	-0.569	-0.244	-1.234	0.67	0.336	-1.13	1.253	0.604	0.074	0.556	0.332	1.277	-0.712	-0.352	1.178	-1.306	-0.596	-0.074	-1.017	-0.384	-2.196	1.338	0.4	-2.031	2.28	0.898	-0.016	0.963	0.662	2.239	-1.183	-0.629	2.087	-2.272	-1.026	-0.174
1.058	0.725	-0.278	-0.25	-0.322	1.197	-0.765	-0.41	-0.971	0.811	0.674	-0.959	1.199	0.681	0.426	0.32	0.077	1.305	-0.79	-0.672	0.943	-1.102	-0.762	-0.446	-0.336	-0.013	-1.391	1.366	1.336	-1.585	2.001	1.254	0.771	0.515	0.026	2.398	-1.364	-1.257	1.715	-2.04	-1.192	-0.747	-0.582	-0.15	-2.429
0.872	0.486	-0.752	-0.324	0.642	1.075	-0.521	-1.141	-0.292	0.731	-0.128	-1.119	0.894	1.05	-0.306	0.159	1.143	0.886	-0.745	0.061	1.159	-0.881	-1	0.264	-0.096	-1.158	-0.81	1.474	-0.236	-1.902	1.671	1.802	-0.535	0.096	2.033	1.475	-1.486	0.205	1.929	-1.609	-1.774	0.444	-0.208	-1.998	-1.486
0.106	0.515	-1.207	0.02	0.715	1.067	-0.046	-1.229	0.125	0.087	-0.149	-1.431	0.134	1.12	-0.852	0.083	1.238	0.591	-0.044	0.104	1.423	-0.044	-1.114	0.817	-0.027	-1.197	-0.582	-0.158	-0.235	-2.486	0.261	1.972	-1.477	0.181	2.217	1.006	-0.137	0.258	2.545	-0.3	-1.958	1.41	-0.036	-2.255	-0.965
-0.457	-0.343	-1.136	0.9	0.933	0.074	-0.409	-0.642	1.062	-0.809	-0.844	-0.784	-0.048	0.201	-1.352	0.804	1.015	-0.615	0.903	0.744	0.749	0.041	-0.212	1.384	-0.807	-1.025	0.618	-1.454	-1.472	-1.386	-0.12	0.282	-2.492	1.376	1.809	-1.018	1.543	1.344	1.325	0.043	-0.162	2.452	-1.472	-1.681	1.119
-0.4	0.138	-1.238	0.992	0.714	0.407	-0.606	-0.815	0.803	-0.902	-0.331	-1.057	0.146	0.58	-1.279	1.031	0.973	-0.259	0.834	0.393	1.02	-0.125	-0.578	1.259	-1.019	-0.951	0.25	-1.544	-0.544	-1.926	0.22	1.129	-2.218	1.848	1.633	-0.373	1.536	0.53	1.812	-0.204	-1.146	2.222	-1.822	-1.687	0.549
1.005	0.639	0.503	-0.828	-0.622	0.747	-0.145	-0.053	-1.283	1.212	0.736	-0.196	0.692	0.465	1.141	-0.415	-0.399	1.273	-1.14	-0.791	0.128	-0.747	-0.38	-1.17	0.474	0.287	-1.255	2.148	1.309	-0.302	1.119	0.899	2.024	-0.759	-0.59	2.287	-2.079	-1.287	0.306	-1.332	-0.814	-2.019	0.828	0.565	-2.217
0.717	0.788	-0.726	0.475	-0.478	1.088	-1.116	-0.411	-0.489	0.188	0.777	-1.183	1.175	0.686	-0.212	0.975	-0.002	1.003	-0.069	-0.906	1.039	-1.093	-0.833	0.074	-0.995	0.04	-1.021	0.309	1.51	-1.959	1.964	1.407	-0.172	1.739	-0.063	1.786	-0.257	-1.462	1.992	-2.021	-1.378	0.268	-1.915	0.223	-1.615
0.873	0.551	-0.753	0.286	-0.296	1.223	-1.091	-0.421	-0.507	0.4	0.478	-1.278	1.26	0.537	-0.162	0.899	-0.02	1.071	-0.351	-0.561	1.232	-1.236	-0.631	0.147	-0.811	-0.196	-1.096	0.533	1.119	-2.133	2.247	1.025	-0.156	1.479	0.178	1.99	-0.626	-0.9	2.175	-2.32	-0.848	0.194	-1.473	-0.181	-1.985
0.789	0.751	-0.711	-0.042	0.124	1.258	-0.742	-0.893	-0.577	0.527	0.389	-1.289	0.969	1.028	-0.055	0.457	0.622	1.164	-0.536	-0.392	1.204	-0.962	-1.037	0.076	-0.446	-0.653	-1.171	0.846	0.673	-2.253	1.7	1.84	-0.084	0.771	1.184	2.072	-0.93	-0.718	2.195	-1.755	-1.704	0.206	-0.642	-1.231	-2.066
0.48	-1.108	-0.395	0.803	0.875	0.478	-1.251	0.228	-0.07	-0.169	-1.274	-0.524	1.084	-0.803	-0.229	1.279	0.376	0.348	0.241	1.264	0.565	-1.076	0.841	0.167	-1.281	-0.419	-0.296	-0.308	-2.256	-1.001	1.815	-1.629	-0.241	2.235	0.803	0.58	0.397	2.255	0.893	-1.94	1.526	0.32	-2.277	-0.685	-0.582
-0.516	-0.968	-0.65	1.198	0.365	-0.262	-0.671	0.568	0.915	-1.085	-0.847	-0.225	0.129	-0.995	-0.986	1.167	-0.141	-0.744	1.092	0.823	0.243	-0.126	0.977	0.95	-1.151	0.103	0.768	-1.988	-1.447	-0.462	0.059	-1.591	-1.876	2.135	-0.19	-1.26	1.89	1.498	0.445	-0.04	1.683	1.734	-2.082	0.129	1.412
-0.149	-1.266	0.332	0.413	0.305	-1.17	-0.316	0.949	0.834	-0.388	-0.997	0.955	0.081	-1.403	-0.337	0.393	-0.426	-1.282	0.386	0.995	-0.922	-0.072	1.378	0.368	-0.525	0.422	1.207	-0.558	-1.727	1.73	0.359	-2.385	-0.528	0.712	-0.625	-2.307	0.665	1.709	-1.66	-0.146	2.42	0.617	-0.907	0.639	2.158
-1.238	0.386	0.17	0.311	-1.27	-0.025	0.91	0.864	-0.173	-0.984	1.033	0.1	-1.353	-0.3	0.22	-0.379	-1.359	0.101	0.967	-1.045	-0.155	1.355	0.307	-0.205	0.356	1.316	-0.126	-1.719	1.811	0.301	-2.397	-0.562	0.284	-0.724	-2.34	0.147	1.753	-1.828	-0.149	2.389	0.602	-0.323	0.736	2.365	-0.195
1.106	0.625	0.071	-1.06	0.512	0.481	0.009	-1.196	-0.509	1.393	0.053	-0.217	0.701	1.117	0.362	-0.624	1.055	0.644	-1.368	-0.101	0.283	-0.694	-1.153	-0.428	0.722	-1.108	-0.541	2.443	0.159	-0.426	1.175	2.054	0.542	-1.198	1.945	0.999	-2.439	-0.066	0.379	-1.294	-1.991	-0.675	1.183	-1.964	-0.923
1.076	0.585	0.439	-1.089	0.675	-0.128	-0.002	-1.255	-0.197	1.375	-0.043	0.324	0.663	1.144	0.519	-0.688	1.229	0.109	-1.371	0.053	-0.326	-0.665	-1.175	-0.402	0.65	-1.194	0.044	2.438	-0.031	0.412	1.071	2.044	0.874	-1.214	2.129	0.031	-2.382	0.041	-0.756	-1.154	-2.087	-0.794	1.278	-2.108	-0.037
0.747	0.654	0.804	-1.085	0.49	-0.43	0.358	-1.181	-0.368	1.18	0.126	0.712	0.235	1.108	0.803	-0.879	1.045	-0.075	-1.17	-0.131	-0.73	-0.261	-1.173	-0.724	0.946	-1.06	0.031	2.043	0.172	1.351	0.405	2.025	1.375	-1.536	1.887	-0.131	-2.065	-0.114	-1.388	-0.522	-2.026	-1.275	1.624	-1.858	0.052
1.098	0.658	-0.209	-1.025	0.598	0.468	-0.044	-1.283	-0.298	1.344	-0.009	-0.383	0.735	1.241	-0.015	-0.629	1.171	0.409	-1.306	-0.045	0.468	-0.733	-1.203	-0.162	0.657	-1.22	-0.408	2.389	0.124	-0.704	1.192	2.197	0.059	-1.096	2.076	0.818	-2.315	-0.053	0.816	-1.34	-2.119	-0.27	1.102	-2.16	-0.627
0.588	1.114	-0.331	-1.301	-0.107	-0.047	0.671	-0.962	0.411	1.198	0.762	-0.199	-0.089	1.345	-0.433	-1.268	0.546	-0.272	-1.197	-0.745	0.187	0.028	-1.278	0.441	1.23	-0.521	0.354	2.168	1.272	-0.412	-0.18	2.396	-0.613	-2.19	0.969	-0.517	-2.032	-1.355	0.323	0.169	-2.35	0.67	2.163	-1.04	0.472
0.953	0.653	0.511	-1.041	0.604	-0.407	0.075	-1.262	-0.197	1.273	0.018	0.471	0.521	1.214	0.467	-0.711	1.176	-0.173	-1.263	-0.038	-0.602	-0.57	-1.211	-0.482	0.718	-1.17	0.098	2.193	0.111	1.113	1.038	2.074	0.9	-1.159	2.189	-0.229	-2.216	-0.145	-1.05	-1.015	-2.12	-0.786	1.19	-2.098	0.274
0.418	0.816	0.888	-1.271	-0.052	-0.326	0.839	-0.804	-0.597	1.067	0.549	0.791	-0.286	0.975	0.883	-1.342	0.456	0.17	-1.055	-0.561	-0.794	0.27	-1.072	-0.944	1.314	-0.438	-0.189	1.846	1.128	1.351	-0.341	1.797	1.645	-2.326	0.798	0.32	-1.938	-0.875	-1.304	0.502	-1.798	-1.724	2.29	-0.958	-0.205
1.094	-0.452	0.509	-0.602	1.008	0.525	-0.56	-0.58	-1.001	1.015	-0.984	0.024	1.045	0.123	0.942	-0.08	0.99	1.008	-1.061	0.905	-0.017	-1.067	-0.074	-0.937	-0.013	-1.016	-0.942	1.883	-1.69	0.026	1.82	0.28	1.589	-0.099	1.853	1.701	-1.836	1.6	0.063	-1.775	-0.199	-1.783	0.166	-1.786	-1.674
0.505	0.339	1.149	-1.056	0.52	-0.439	0.591	-0.808	-0.778	1.008	-0.093	0.996	-0.053	0.734	1.163	-1.08	0.845	0.205	-0.903	0.14	-1.045	0.074	-0.725	-1.249	1.049	-0.782	-0.231	1.717	-0.152	1.835	-0.051	1.26	2.112	-1.961	1.472	0.415	-1.69	0.213	-1.752	0.045	-1.412	-2.063	1.845	-1.501	-0.385
0.216	0.761	0.981	-1.152	0.072	-0.567	0.899	-0.838	-0.383	0.814	0.406	1.023	-0.408	1.031	0.822	-1.311	0.616	-0.118	-0.875	-0.48	-0.936	0.402	-1.045	-0.851	1.289	-0.541	0.133	1.457	0.746	1.806	-0.731	1.78	1.542	-2.26	1.076	-0.309	-1.445	-0.834	-1.784	0.772	-1.815	-1.514	2.295	-0.941	0.185
0.299	0.666	1.08	-0.864	0.473	-0.852	0.637	-1.059	-0.257	0.718	0.119	1.245	-0.141	1.149	0.791	-0.905	1.017	-0.386	-0.716	-0.104	-1.226	0.288	-1.044	-0.869	0.927	-0.947	0.377	1.157	0.188	2.201	-0.308	1.911	1.418	-1.636	1.744	-0.723	-1.363	-0.403	-2.068	0.372	-1.897	-1.478	1.606	-1.734	0.717
-0.641	0.222	1.075	0.397	1.018	-0.72	0.254	-1.212	-0.349	-0.667	-0.478	1.137	-0.532	0.908	0.9	0.085	1.428	-0.253	0.646	0.493	-1.122	0.6	-0.891	-0.874	-0.11	-1.393	0.228	-1.195	-0.934	1.959	-1.088	1.553	1.544	0.248	2.471	-0.338	1.29	0.931	-1.872	0.953	-1.632	-1.643	-0.232	-2.455	0.334
-0.057	1.075	0.728	-0.34	0.039	-1.238	0.324	-1.133	0.53	0.162	0.653	1.252	-0.273	1.377	0.121	-0.471	0.719	-1.11	-0.184	-0.649	-1.22	0.209	-1.397	-0.12	0.387	-0.747	1.125	0.378	1.186	2.199	-0.511	2.391	0.259	-0.674	1.274	-1.987	-0.284	-1.101	-2.227	0.568	-2.424	-0.235	0.693	-1.284	1.944
-0.389	0.618	1.041	-0.711	0.033	-1.034	1.082	-0.662	0.002	0.183	0.281	1.344	-0.921	0.876	0.622	-1.105	0.452	-0.665	-0.233	-0.383	-1.289	0.895	-0.814	-0.658	1.137	-0.439	0.665	0.36	0.588	2.414	-1.613	1.598	1.044	-1.923	0.835	-1.258	-0.504	-0.821	-2.182	1.637	-1.383	-1.185	2.087	-0.79	1.147
-0.038	0.064	1.303	-1.022	-0.28	-0.679	1.103	0.103	-0.564	0.651	0.197	1.305	-0.715	-0.094	1.161	-1.335	-0.289	-0.078	-0.583	-0.268	-1.194	0.734	-0.06	-1.143	1.35	0.247	0.09	1.107	0.495	2.224	-1.316	-0.076	2.045	-2.437	-0.299	-0.151	-1.115	-0.285	-2.221	1.314	-0.055	-2.036	2.346	0.487	-0.003
-0.325	-0.521	1.145	-0.855	0.675	-0.63	1.155	-0.256	-0.543	0.324	-0.798	1.125	-0.946	-0.206	1.03	-1.28	0.538	-0.113	-0.333	0.719	-1.084	0.955	0.174	-1.067	1.222	-0.669	0.042	0.628	-1.298	2.023	-1.615	-0.185	1.871	-2.235	1.086	-0.135	-0.631	1.365	-1.892	1.693	0.315	-1.821	2.219	-1.041	0.02
0.456	-0.831	0.897	-1.24	0.033	-0.283	0.851	0.682	-0.715	1.107	-0.611	0.691	-0.236	-0.974	0.987	-1.275	-0.466	0.197	-1.06	0.512	-0.755	0.261	0.86	-1.074	1.361	0.404	-0.286	1.884	-0.916	1.364	-0.49	-1.65	1.796	-2.29	-0.751	0.546	-1.93	1.051	-1.206	0.302	1.662	-1.802	2.366	0.878	-0.46
0.694	0.76	0.742	-1.165	0.363	-0.368	0.461	-1.147	-0.334	1.147	0.214	0.726	0.163	1.222	0.668	-1.009	0.961	-0.003	-1.186	-0.279	-0.681	-0.138	-1.201	-0.64	1.001	-0.975	0.024	2.067	0.403	1.333	0.256	2.119	1.208	-1.827	1.713	-0.115	-2.095	-0.475	-1.246	-0.253	-2.067	-1.242	1.874	-1.635	-0.033
0.426	1.196	0.36	-1.163	-0.15	-0.532	0.722	-1.032	0.26	1.007	0.851	0.605	-0.205	1.406	0.091	-1.196	0.559	-0.455	-1.015	-0.833	-0.525	0.165	-1.379	0.033	1.207	-0.574	0.458	1.794	1.465	0.939	-0.365	2.519	0.069	-2.025	0.901	-0.99	-1.666	-1.511	-1.085	0.244	-2.439	-0.121	2.054	-0.967	0.981
-0.234	1.243	0.292	-0.204	-0.442	-1.194	0.416	-0.815	0.891	-0.019	1.083	0.954	-0.425	1.259	-0.407	-0.377	0.234	-1.318	-0.007	-1.068	-0.934	0.389	-1.293	0.389	0.387	-0.247	1.289	0.054	1.946	1.65	-0.826	2.257	-0.627	-0.662	0.387	-2.365	-0.024	-1.863	-1.653	0.778	-2.215	0.7	0.733	-0.481	2.322
-0.195	1.076	0.726	-0.991	-0.438	-0.685	1.159	-0.549	-0.033	0.476	0.978	0.91	-0.85	1.067	0.451	-1.364	0.129	-0.458	-0.515	-0.947	-0.822	0.831	-1.018	-0.485	1.356	0.001	0.423	0.829	1.578	1.742	-1.415	1.848	0.798	-2.383	0.151	-0.888	-0.836	-1.719	-1.554	1.486	-1.833	-0.834	2.385	-0.236	0.717
-0.155	0.57	1.166	-0.719	0.378	-0.98	0.894	-0.897	-0.16	0.366	0.15	1.351	-0.657	0.932	0.846	-1.019	0.821	-0.497	-0.338	-0.1	-1.341	0.679	-0.92	-0.828	1.015	-0.762	0.531	0.592	0.209	2.416	-1.135	1.616	1.525	-1.861	1.362	-1	-0.554	-0.193	-2.405	1.145	-1.716	-1.452	1.766	-1.399	0.853
-0.198	0.78	1.001	-1.012	-0.433	-0.697	1.198	-0.391	-0.284	0.497	0.729	1.063	-0.877	0.729	0.83	-1.408	-0.083	-0.196	-0.503	-0.737	-1.119	0.899	-0.692	-0.797	1.362	-0.051	0.267	0.855	1.349	1.873	-1.451	1.428	1.422	-2.444	-0.107	-0.422	-0.923	-1.319	-1.904	1.568	-1.203	-1.425	2.424	-0.042	0.408
0.622	0.966	0.592	-1.242	0.118	-0.332	0.609	-1.087	-0.268	1.162	0.519	0.585	0.015	1.302	0.533	-1.158	0.776	-0.055	-1.192	-0.56	-0.573	-0.031	-1.31	-0.503	1.178	-0.735	-0.006	2.071	0.922	0.999	-0.023	2.319	0.963	-2.007	1.446	-0.056	-2.077	-0.967	-1.034	0.007	-2.322	-0.902	2.056	-1.39	0.049
0.729	1.013	-0.201	-1.289	0.132	-0.083	0.549	-1.12	0.267	1.236	0.561	-0.147	0.138	1.352	-0.243	-1.192	0.803	-0.18	-1.24	-0.547	0.023	-0.126	-1.309	0.304	1.158	-0.802	0.204	2.238	1.015	-0.15	0.216	2.351	-0.378	-2.073	1.393	-0.294	-2.23	-1.04	0.024	-0.224	-2.427	0.373	2.097	-1.351	0.465
1.085	0.692	-0.273	-1.129	0.571	0.026	0.104	-1.261	0.265	1.408	0.088	-0.193	0.651	1.223	-0.305	-0.782	1.137	-0.178	-1.347	-0.062	0.227	-0.579	-1.226	0.367	0.791	-1.157	0.126	2.452	0.091	-0.367	1.021	2.149	-0.761	-1.373	1.995	-0.306	-2.407	-0.062	0.408	-1.15	-2.054	0.696	1.317	-2.122	0.286
0.651	1.098	0.109	-1.134	-0.006	-0.595	0.495	-1.075	0.495	1.13	0.701	0.469	0.104	1.37	-0.262	-1.013	0.653	-0.688	-1.13	-0.664	-0.447	-0.128	-1.357	0.228	1.065	-0.662	0.72	1.97	1.266	0.763	0.13	2.416	-0.412	-1.842	1.244	-1.004	-1.904	-1.252	-0.849	-0.176	-2.489	0.237	1.793	-1.225	1.244
0.171	1.286	-0.093	-1.043	-0.571	-0.5	0.878	-0.698	0.568	0.795	1.182	0.252	-0.466	1.242	-0.432	-1.222	0.087	-0.677	-0.758	-1.167	-0.263	0.446	-1.233	0.4	1.217	-0.073	0.663	1.315	2.086	0.41	-0.829	2.234	-0.66	-2.093	0.241	-1.27	-1.268	-2.121	-0.437	0.778	-2.189	0.757	2.084	-0.288	1.256
0.725	1.049	-0.064	-0.434	-0.516	-1.074	-0.266	-0.498	1.143	0.691	1.005	0.642	0.678	0.979	-0.772	-0.046	-0.032	-1.427	-0.761	-0.943	-0.601	-0.601	-0.949	0.739	0.098	0.023	1.432	1.302	1.687	1.213	1.129	1.762	-1.302	-0.185	-0.085	-2.458	-1.411	-1.615	-1.116	-1.068	-1.817	1.174	0.175	-0.015	2.476
-0.051	1.326	-0.067	-0.877	-0.705	-0.622	0.925	-0.569	0.602	0.512	1.257	0.359	-0.609	1.25	-0.496	-1.138	-0.043	-0.831	-0.521	-1.275	-0.349	0.594	-1.159	0.424	1.153	0.091	0.688	0.962	2.164	0.589	-1.144	2.199	-0.677	-1.973	-0.259	-1.487	-0.928	-2.251	-0.505	1.079	-2.011	0.853	2.012	0.037	1.433
-0.224	1.267	-0.046	-0.692	-0.798	-0.752	0.919	-0.434	0.771	0.265	1.303	0.44	-0.697	1.083	-0.521	-1.009	-0.189	-0.992	-0.295	-1.311	-0.434	0.708	-1.062	0.527	1.032	0.259	0.917	0.658	2.324	0.625	-1.302	1.963	-0.84	-1.91	-0.389	-1.643	-0.446	-2.352	-0.788	1.201	-1.913	1.059	1.794	0.284	1.651
-0.684	1.108	-0.155	-0.541	-1.12	-0.232	1.23	0.023	0.339	-0.074	1.439	-0.066	-1.212	0.658	-0.253	-1.126	-0.733	-0.324	0.103	-1.378	-0.099	1.223	-0.697	0.31	1.098	0.737	0.321	-0.159	2.436	0.22	-2.182	1.187	-0.412	-1.966	-1.331	-0.689	0.188	-2.434	-0.249	2.136	-1.221	0.56	1.973	1.336	0.681
-1.047	0.696	-0.368	0.045	-1.274	-0.2	1.001	0.576	0.492	-0.675	1.232	-0.135	-1.305	0.085	-0.572	-0.6	-1.16	-0.492	0.687	-1.242	0.107	1.297	-0.067	0.525	0.593	1.148	0.387	-1.087	2.231	-0.198	-2.359	0.055	-0.888	-1.094	-2.055	-0.721	1.213	-2.226	0.151	2.227	0.009	1.023	1.103	1.991	0.812
-1.238	0.259	0.193	0.348	-0.904	-0.841	0.907	0.693	0.658	-0.987	0.762	0.609	-1.344	-0.269	-0.241	-0.34	-0.992	-0.932	1.002	-0.708	-0.655	1.344	0.244	0.35	0.367	1.077	0.894	-1.805	1.402	1.074	-2.393	-0.583	-0.479	-0.645	-1.765	-1.695	1.754	-1.326	-1.105	2.348	0.41	0.583	0.698	1.747	1.597
-0.796	-0.64	-0.772	1.259	-0.285	-0.055	-0.487	0.897	0.832	-1.268	-0.207	-0.481	-0.244	-1.01	-0.965	1.053	-0.783	-0.517	1.325	0.242	0.405	0.183	0.937	1.023	-1.106	0.757	0.546	-2.251	-0.319	-0.915	-0.293	-1.702	-1.787	1.898	-1.245	-0.928	2.298	0.339	0.835	0.422	1.716	1.747	-2.018	1.274	1.037
-1.096	-0.249	-0.665	1.112	-0.547	-0.35	-0.071	0.775	1.009	-1.401	0.185	-0.241	-0.671	-0.658	-1.022	0.702	-0.886	-0.839	1.392	-0.155	0.177	0.589	0.602	1.065	-0.739	0.861	0.846	-2.497	0.412	-0.31	-1.122	-1.223	-1.821	1.339	-1.463	-1.444	2.445	-0.256	0.295	1.229	1.149	1.735	-1.267	1.433	1.559
-1.026	0.713	0.34	-0.17	-1.043	-0.732	1.148	0.343	0.421	-0.564	1.125	0.635	-1.379	0.22	0.011	-0.851	-0.841	-0.715	0.51	-1.126	-0.663	1.347	-0.231	0.026	0.824	0.883	0.773	-0.972	1.966	1.177	-2.385	0.428	-0.086	-1.351	-1.549	-1.397	1.038	-1.971	-1.097	2.402	-0.504	0.093	1.382	1.599	1.244
-0.909	-0.144	-0.909	0.595	-1.016	0.446	0.29	1.198	0.47	-0.909	0.579	-0.878	-0.804	-0.845	-0.844	0.146	-1.342	0.002	0.961	-0.577	0.855	0.746	0.844	0.882	-0.195	1.43	-0.001	-1.634	0.944	-1.522	-1.435	-1.486	-1.442	0.318	-2.374	0.04	1.864	-1.009	1.275	1.443	1.335	1.554	-0.5	2.503	0.078
-1.24	-0.167	0.235	0.841	-0.976	0.087	0.387	1.158	-0.38	-1.3	0.526	0.013	-1.045	-0.837	0.42	0.229	-1.345	0.179	1.353	-0.494	-0.022	1.027	0.829	-0.399	-0.295	1.357	-0.33	-2.267	0.921	0.141	-1.827	-1.538	0.76	0.425	-2.404	0.416	2.437	-0.891	-0.047	1.796	1.492	-0.611	-0.532	2.384	-0.521
0.503	-0.73	0.912	0.187	1.266	-0.003	-0.739	-0.559	-0.92	0.212	-1.265	0.548	0.731	-0.12	1.168	0.573	1.137	0.558	-0.226	1.253	-0.583	-0.747	0.091	-1.183	-0.659	-1.149	-0.533	0.424	-2.184	1.117	1.331	-0.178	2	0.954	1.963	1.163	-0.252	2.271	-0.933	-1.227	0.152	-2.166	-1.114	-1.971	-1.156
1.106	0.256	0.59	-0.749	0.956	-0.417	-0.362	-1.2	-0.138	1.203	-0.435	0.626	0.892	0.911	0.479	-0.199	1.372	-0.266	-1.226	0.44	-0.501	-0.973	-0.896	-0.402	0.291	-1.364	0.146	2.022	-0.759	1.255	1.582	1.694	0.816	-0.253	2.348	-0.615	-2.109	0.759	-1.029	-1.655	-1.652	-0.678	0.425	-2.418	0.169
1.256	0.172	-0.307	-0.815	0.961	-0.12	-0.41	-1.12	0.517	1.325	-0.478	-0.142	1.056	0.797	-0.43	-0.252	1.338	-0.313	-1.278	0.476	0.104	-1.045	-0.806	0.531	0.269	-1.297	0.464	2.311	-0.894	-0.273	1.77	1.532	-0.83	-0.446	2.357	-0.729	-2.373	0.845	0.13	-1.881	-1.488	0.828	0.544	-2.384	0.66
0.37	0.334	-1.195	-0.756	0.791	0.688	0.338	-1.111	0.477	0.714	-0.264	-1.199	-0.024	0.891	-1.062	-0.696	1.212	0.121	-0.734	0.289	1.17	-0.089	-0.968	0.998	0.715	-1.127	-0.1	1.454	-0.419	-2.073	-0.121	1.575	-1.848	-1.229	2.105	0.22	-1.244	0.449	2.151	-0.091	-1.701	1.8	1.343	-2.043	-0.179
0.768	0.131	-1.009	-0.619	1.019	0.436	-0.175	-1.185	0.532	0.842	-0.564	-0.948	0.596	0.802	-0.965	-0.276	1.36	-0.099	-0.891	0.563	0.912	-0.604	-0.811	0.981	0.271	-1.433	0.024	1.562	-0.863	-1.668	1.132	1.41	-1.585	-0.476	2.415	-0.08	-1.597	0.98	1.658	-1.078	-1.419	1.744	0.519	-2.438	0.026
0.441	-0.876	-0.844	0.522	1.171	0.035	-0.913	-0.319	0.818	-0.094	-1.254	-0.603	0.944	-0.403	-0.981	0.946	0.915	-0.472	0.039	1.289	0.537	-0.829	0.314	1.088	-0.888	-0.916	0.453	-0.362	-2.207	-1.093	1.622	-0.669	-1.818	1.589	1.662	-0.798	0.157	2.326	0.931	-1.486	0.536	1.906	-1.636	-1.592	0.851
0.061	-0.483	-1.216	-1.038	0.61	0.386	0.987	-0.113	0.776	0.692	-0.686	-1.033	-0.589	-0.239	-1.27	-1.253	0.488	-0.274	-0.695	0.681	0.986	0.566	0.191	1.259	1.303	-0.401	0.202	1.319	-1.245	-1.718	-0.973	-0.208	-2.254	-2.363	0.764	-0.324	-1.247	1.057	1.808	0.948	0.313	2.231	2.292	-0.715	0.387
-0.664	0.117	1.115	1.269	-0.18	0.001	-0.614	-0.02	-1.104	-1.234	0.153	0.678	-0.025	0.065	1.436	1.17	-0.14	0.701	1.226	-0.215	-0.706	0.01	-0.142	-1.379	-1.168	0.082	-0.702	-2.168	0.389	1.07	0.032	0.035	2.531	2.072	-0.16	1.34	2.158	-0.27	-1.246	-0.006	-0.123	-2.456	-2.066	0.324	-1.267
-0.421	0.949	0.757	1.238	-0.373	0.02	-0.79	-0.565	-0.814	-1.036	0.795	0.412	0.25	0.999	1.001	1.276	0.122	0.542	1.067	-0.818	-0.51	-0.201	-0.942	-0.977	-1.291	-0.129	-0.556	-1.848	1.379	0.954	0.33	1.752	1.765	2.196	0.129	1.058	1.876	-1.473	-0.922	-0.351	-1.654	-1.83	-2.268	-0.159	-0.936
0.251	0.946	0.808	0.948	-0.818	-0.291	-1.145	-0.045	-0.609	-0.459	1.116	0.7	0.945	0.683	0.818	1.338	-0.403	0.159	0.46	-1.133	-0.727	-0.85	-0.61	-0.891	-1.306	0.542	-0.276	-0.874	1.913	1.179	1.575	1.066	1.616	2.31	-0.8	0.424	0.743	-2.013	-1.176	-1.556	-1.212	-1.415	-2.327	0.85	-0.411
1.052	0.672	0.389	0.067	-0.806	-1.015	-1.109	0.04	0.648	0.619	0.878	0.89	1.366	0.389	-0.156	0.758	-0.643	-0.989	-0.624	-0.908	-0.911	-1.385	-0.38	0.152	-0.712	0.442	1.066	1.108	1.576	1.603	2.401	0.676	-0.314	1.273	-0.877	-1.917	-1.152	-1.459	-1.659	-2.387	-0.538	0.337	-1.265	0.845	1.898
0.974	-0.181	0.785	-0.257	-0.868	-0.959	-0.688	1.04	0.138	0.773	0.422	1.046	1.071	-0.755	0.429	0.304	-1.225	-0.707	-0.791	-0.422	-1.106	-1.023	0.784	-0.409	-0.266	1.176	0.661	1.374	0.764	1.852	1.816	-1.458	0.846	0.595	-2.173	-1.261	-1.432	-0.621	-1.918	-1.938	1.333	-0.572	-0.483	2.174	1.139
1.029	-0.003	0.779	0.041	-0.637	-1.1	-1.064	0.616	0.357	0.608	0.393	1.176	1.343	-0.393	0.306	0.698	-0.803	-0.914	-0.627	-0.404	-1.161	-1.318	0.357	-0.244	-0.691	0.794	0.922	0.977	0.655	2.118	2.349	-0.726	0.339	1.318	-1.28	-1.608	-1.105	-0.786	-2.077	-2.273	0.821	-0.499	-1.28	1.373	1.64
0.189	-0.316	1.225	0.688	-0.552	-0.937	-0.937	0.87	-0.29	-0.349	0.136	1.35	0.693	-0.742	0.957	0.946	-0.92	-0.422	0.341	-0.115	-1.351	-0.687	0.763	-0.946	-1.084	0.883	0.409	-0.51	0.259	2.436	1.301	-1.202	1.719	1.789	-1.59	-0.677	0.643	-0.343	-2.395	-1.121	1.433	-1.723	-1.961	1.439	0.644
0.627	-0.832	-0.789	-0.032	1.248	-0.231	-0.578	-0.431	1.026	0.455	-1.356	-0.303	0.73	-0.218	-1.186	0.346	1.079	-0.774	-0.402	1.275	0.351	-0.742	0.265	1.141	-0.345	-1.082	0.786	0.774	-2.354	-0.532	1.296	-0.384	-2.094	0.618	1.891	-1.455	-0.773	2.286	0.527	-1.367	0.364	1.991	-0.589	-1.766	1.549
1.125	-0.203	-0.606	-0.663	1.053	-0.271	-0.451	-0.858	0.806	1.138	-0.804	-0.225	0.989	0.427	-0.92	-0.135	1.236	-0.678	-1.116	0.742	0.149	-0.988	-0.391	0.882	0.136	-1.23	0.624	1.981	-1.464	-0.42	1.726	0.707	-1.589	-0.34	2.206	-1.186	-1.886	1.403	0.486	-1.733	-0.69	1.662	0.229	-2.144	1.215
1.152	0.602	-0.077	-1.093	0.724	0.016	-0.058	-1.268	0.108	1.44	-0.046	0.011	0.737	1.19	-0.158	-0.674	1.298	-0.037	-1.384	0.085	0.078	-0.759	-1.166	0.139	0.644	-1.225	0.077	2.487	-0.195	-0.003	1.328	2.109	-0.251	-1.257	2.184	-0.201	-2.437	0.038	0.13	-1.277	-2.088	0.133	1.153	-2.185	0.08
0.43	0.173	-1.213	-0.51	0.981	0.64	0.148	-1.152	0.58	0.573	-0.49	-1.191	0.244	0.813	-1.097	-0.363	1.347	0.077	-0.576	0.512	1.133	-0.17	-0.83	1.119	0.453	-1.347	-0.027	1.079	-0.856	-2.095	0.291	1.476	-1.976	-0.764	2.339	0.12	-1.218	0.844	1.984	-0.272	-1.407	2.043	0.723	-2.402	-0.09
-0.331	0.352	-1.187	0.022	0.877	0.929	0.353	-1.25	0.237	-0.225	-0.33	-1.331	-0.402	0.988	-0.918	-0.114	1.334	0.415	0.167	0.322	1.336	0.408	-1.014	0.911	0.271	-1.349	-0.462	-0.507	-0.574	-2.332	-0.578	1.823	-1.538	-0.273	2.284	0.776	0.216	0.644	2.36	0.692	-1.784	1.644	0.345	-2.345	-0.861
-0.264	-1.234	-0.284	-0.867	0.894	-0.218	1.132	0.362	0.493	0.403	-1.315	-0.096	-0.905	-1.011	-0.435	-1.25	0.341	-0.401	-0.374	1.351	-0.024	0.849	1.019	0.493	1.28	-0.334	0.44	0.729	-2.401	-0.185	-1.558	-1.765	-0.831	-2.27	0.547	-0.645	-0.767	2.378	0.072	1.524	1.776	0.856	2.339	-0.586	0.754
-0.925	-0.058	-0.905	-0.006	0.977	0.858	0.978	-0.825	-0.076	-0.536	-0.602	-1.167	-1.196	0.517	-0.565	-0.584	1.211	0.559	0.576	0.643	1.044	1.219	-0.432	0.481	0.631	-1.112	-0.642	-1.083	-1.235	-1.821	-2.162	0.76	-0.907	-1.02	2.007	1.14	0.953	1.133	1.91	2.129	-0.866	0.859	1.073	-2.022	-0.89
-1.211	0.247	-0.375	0.345	0.123	1.242	0.847	-0.311	-0.888	-0.989	0.076	-1.038	-1.302	0.392	0.323	-0.351	0.262	1.346	1.001	-0.015	0.998	1.264	-0.308	-0.314	0.333	-0.268	-1.365	-1.647	0.163	-1.862	-2.326	0.649	0.684	-0.599	0.385	2.336	1.767	-0.166	1.826	2.306	-0.483	-0.553	0.544	-0.687	-2.381
0.69	0.607	-0.898	-1.144	0.477	0.357	0.503	-1.036	0.622	1.146	0.077	-0.764	0.167	1.093	-0.905	-1.008	0.967	-0.135	-1.144	-0.065	0.821	-0.107	-1.036	0.979	1.061	-0.922	0.196	1.95	0.046	-1.515	0.217	1.7	-1.794	-1.843	1.702	-0.327	-2.054	-0.138	1.381	-0.218	-1.817	1.76	1.832	-1.605	0.301
0.689	0.694	-0.798	-1.218	0.35	0.26	0.47	-1.144	0.411	1.172	0.176	-0.739	0.11	1.113	-0.785	-1.067	0.92	-0.126	-1.238	-0.26	0.604	-0.174	-1.197	0.743	1.059	-0.989	0.002	2.097	0.522	-1.193	0.43	2.045	-1.256	-1.819	1.654	-0.15	-2.174	-0.478	1.154	-0.34	-1.99	1.412	1.945	-1.517	0.333
0.564	1.136	-0.336	-1.233	-0.19	-0.172	0.686	-0.883	0.578	1.138	0.842	-0.098	-0.081	1.31	-0.522	-1.185	0.453	-0.455	-1.135	-0.816	0.141	0.076	-1.256	0.584	1.226	-0.386	0.517	2.056	1.394	-0.257	-0.081	2.293	-1.019	-2.123	0.774	-0.865	-2.09	-1.372	0.159	0.093	-2.332	0.894	2.105	-0.904	0.921
-0.567	1.085	-0.334	-0.606	-0.849	0.759	1.236	-0.234	-0.372	0.02	1.201	-0.663	-1.084	0.844	0.028	-1.133	-0.353	0.7	-0.005	-1.243	0.75	1.134	-0.874	-0.032	1.219	0.43	-0.655	0.059	2.184	-1.168	-2.018	1.471	0.114	-1.989	-0.679	1.18	-0.082	-2.238	1.16	1.868	-1.494	-0.065	2.012	0.75	-1.348
-1.06	0.724	0.203	0.074	-1.172	0.474	0.986	0.45	-0.687	-0.74	1.182	-0.22	-1.263	0.187	0.624	-0.548	-1.008	0.718	0.699	-1.209	0.161	1.301	-0.157	-0.594	0.55	1.008	-0.712	-1.277	2.055	-0.578	-2.252	0.335	1.022	-1.069	-1.773	1.296	1.189	-2.099	0.479	2.385	-0.261	-0.891	1.024	1.739	-1.305
-1.199	0.328	0.325	0.496	-1.089	0.446	0.679	0.728	-0.784	-1.082	0.884	-0.091	-1.179	-0.259	0.703	-0.114	-1.171	0.776	1.025	-0.897	0.06	1.151	0.213	-0.775	0.141	1.152	-0.703	-1.949	1.527	-0.192	-2.076	-0.489	1.312	-0.004	-1.955	1.426	1.94	-1.53	0.126	1.998	0.493	-1.314	0.147	2.032	-1.327
-0.459	1.193	-0.168	-0.479	-0.803	0.908	0.946	-0.386	-0.746	-0.026	1.248	-0.714	-0.851	1.002	0.382	-0.895	-0.265	1.087	0.002	-1.241	0.645	0.895	-0.991	-0.416	0.893	0.257	-1.001	0.017	2.223	-1.134	-1.424	1.783	0.743	-1.682	-0.55	1.758	-0.053	-2.258	1.05	1.559	-1.802	-0.589	1.566	0.593	-1.809
-0.012	1.023	-0.762	-1.097	-0.618	0.204	1.095	-0.367	0.63	0.676	0.98	-0.552	-0.702	0.957	-0.867	-1.385	-0.142	-0.27	-0.691	-1.016	0.659	0.693	-0.854	0.889	1.377	0.166	0.311	1.237	1.683	-1.236	-1.241	1.657	-1.547	-2.397	-0.385	-0.534	-1.193	-1.783	1.164	1.185	-1.534	1.598	2.439	0.273	0.383
0.851	0.18	-0.962	-1.289	-0.011	-0.193	0.439	-0.11	1.16	1.349	0.164	-0.456	0.256	0.184	-1.354	-1.097	0.067	-0.868	-1.341	-0.072	0.51	-0.25	-0.225	1.307	1.085	0.023	0.872	2.38	0.298	-0.917	0.477	0.208	-2.381	-1.867	0.136	-1.58	-2.383	-0.355	0.858	-0.456	-0.418	2.361	1.846	-0.012	1.647
0.462	0.559	-1.036	-1.108	-0.586	-0.106	0.658	-0.033	1.109	1.055	0.586	-0.633	-0.176	0.445	-1.334	-1.101	-0.36	-0.801	-0.992	-0.729	0.597	0.075	-0.348	1.389	1.168	0.265	0.703	1.811	1.259	-0.963	-0.353	0.901	-2.357	-2.019	-0.711	-1.382	-1.66	-1.434	1.07	0.136	-0.472	2.454	2.056	0.599	1.256
0.465	0.552	-1.055	-1.229	-0.34	0.084	0.777	-0.233	0.975	1.07	0.537	-0.72	-0.191	0.498	-1.266	-1.237	-0.075	-0.581	-1.079	-0.582	0.744	0.205	-0.511	1.266	1.264	0.082	0.567	1.83	0.948	-1.358	-0.298	0.982	-2.221	-2.218	-0.026	-0.961	-1.922	-0.946	1.198	0.353	-0.833	2.273	2.223	-0.075	1.058
0.633	0.007	-1.086	-1.215	-0.452	0.066	0.559	0.49	1.021	1.163	0.267	-0.718	0.029	-0.245	-1.33	-1.165	-0.54	-0.625	-1.144	-0.304	0.751	-0.018	0.298	1.346	1.079	0.628	0.579	2.063	0.543	-1.287	0.084	-0.633	-2.358	-1.924	-1.108	-1.095	-1.96	-0.515	1.301	-0.13	0.506	2.365	1.922	1.102	1.071
0.94	0.421	-0.798	-0.756	-0.943	-0.371	-0.227	0.579	1.137	1.032	0.885	-0.258	0.744	-0.087	-1.255	-0.389	-0.911	-0.971	-1.042	-0.858	0.274	-0.747	0.111	1.214	0.301	0.995	0.921	1.867	1.532	-0.349	1.261	-0.158	-2.23	-0.631	-1.724	-1.726	-1.837	-1.561	0.458	-1.165	0.093	2.203	0.606	1.684	1.718
1.1	0.464	-0.447	-0.496	-1.099	-0.456	-0.579	0.577	1.016	1.054	0.935	0.082	1.033	-0.056	-0.912	0.069	-1.069	-0.855	-0.998	-1.02	0.027	-1.071	0.084	0.902	-0.026	0.99	1.024	1.807	1.675	0.038	1.729	-0.162	-1.694	0.066	-1.759	-1.732	-1.79	-1.723	-0.175	-1.893	0.281	1.581	0.021	1.825	1.716
-0.29	-0.525	-1.098	-0.899	0.096	0.914	1.198	0.392	0.219	0.369	-0.361	-1.274	-0.918	-0.628	-0.797	-1.275	-0.22	0.46	-0.426	0.406	1.272	0.917	0.523	0.868	1.354	0.191	-0.448	0.669	-0.624	-2.292	-1.612	-1.159	-1.408	-2.262	-0.495	0.684	-0.705	0.753	2.276	1.602	1.094	1.489	2.287	0.52	-0.83
-0.033	0.741	-1.039	-1.106	-0.485	0.512	1.136	-0.298	0.537	0.676	0.762	-0.959	-0.729	0.629	-1.007	-1.401	-0.153	-0.008	-0.692	-0.772	0.98	0.722	-0.643	1.03	1.418	0.077	-0.009	1.122	1.236	-1.757	-1.335	1.324	-1.64	-2.433	-0.22	-0.097	-1.195	-1.291	1.751	1.342	-1.121	1.759	2.505	0.173	-0.041
-0.149	1.076	0.684	-0.886	-0.984	0.051	1.016	-0.138	-0.772	0.436	1.268	0.335	-0.724	0.757	0.943	-1.179	-0.551	0.522	-0.495	-1.307	-0.424	0.748	-0.791	-0.908	1.171	0.515	-0.556	0.797	2.246	0.763	-1.212	1.413	1.674	-2.161	-0.923	0.941	-0.776	-2.341	-0.8	1.376	-1.338	-1.558	2.02	1.051	-0.932
0.004	0.988	0.848	-0.865	-0.906	0.103	0.957	-0.149	-0.869	0.591	1.178	0.49	-0.564	0.685	1.119	-1.116	-0.513	0.606	-0.51	-1.205	-0.4	0.684	-0.74	-1.058	1.143	0.434	-0.563	0.833	2.196	0.757	-1.058	1.119	1.982	-2.09	-0.827	1.003	-0.869	-2.11	-0.801	1.042	-1.178	-1.979	1.913	0.96	-1.157
-0.224	0.977	0.791	-0.718	-1.078	0.035	0.995	0.102	-0.794	0.332	1.296	0.485	-0.748	0.551	1	-1.091	-0.736	0.511	-0.253	-1.303	-0.437	0.8	-0.538	-0.965	1.084	0.732	-0.516	0.483	2.299	0.854	-1.321	0.928	1.892	-1.956	-1.286	0.899	-0.578	-2.275	-0.868	1.398	-0.885	-1.799	1.85	1.216	-1.055
1.223	0.261	0.258	-0.835	0.066	0.93	-0.382	-0.322	-1.202	1.287	0.071	-0.411	1.02	0.417	0.897	-0.282	0.253	1.32	-1.286	-0.126	0.434	-1.033	-0.335	-0.911	0.308	-0.269	-1.362	2.34	0.182	-0.71	1.748	0.753	1.574	-0.562	0.551	2.324	-2.316	-0.362	0.795	-1.841	-0.557	-1.56	0.617	-0.579	-2.39
0.985	-0.394	-0.752	-0.377	1.251	0.006	-0.589	-0.84	0.765	0.831	-1.018	-0.45	1.019	0.27	-0.971	0.112	1.342	-0.49	-0.826	1.025	0.507	-0.937	-0.264	0.954	-0.155	-1.314	0.496	1.499	-1.759	-0.914	1.9	0.493	-1.577	0.25	2.289	-0.887	-1.496	1.826	0.851	-1.822	-0.601	1.611	-0.376	-2.288	0.871
0.381	0.614	-1.031	-1.112	0.322	0.595	0.651	-0.998	0.449	0.917	0.141	-1.042	-0.217	0.998	-0.918	-1.162	0.799	0.07	-0.934	-0.193	1.067	0.118	-1.024	0.926	1.087	-0.868	-0.072	1.705	0.397	-1.768	-0.217	1.892	-1.515	-2.031	1.442	-0.015	-1.706	-0.342	1.845	0.412	-1.805	1.545	2.027	-1.438	-0.123
0.246	0.89	-0.885	-1.065	0.078	0.705	0.817	-0.968	0.16	0.816	0.477	-0.998	-0.348	1.207	-0.676	-1.14	0.701	0.398	-0.88	-0.568	0.918	0.326	-1.166	0.634	1.22	-0.652	-0.323	1.339	0.694	-1.881	-0.571	2.224	-1.033	-1.975	1.257	0.775	-1.462	-0.828	1.747	0.604	-2.118	1.083	2.071	-1.228	-0.643
0.035	0.925	-0.899	-0.956	-0.043	0.88	0.948	-0.848	0.054	0.643	0.666	-1.081	-0.561	1.093	-0.61	-1.224	0.503	0.524	-0.58	-0.59	1.15	0.557	-1.085	0.616	1.23	-0.505	-0.517	1.071	1.02	-2.018	-1.15	1.927	-1.053	-2.156	1.01	0.768	-1.037	-1.081	2.006	1.076	-1.96	1.06	2.132	-0.998	-0.845
0.106	1.244	-0.28	-1.04	-0.419	0.621	0.886	-0.814	-0.367	0.684	1.032	-0.602	-0.501	1.319	0.065	-1.259	0.219	0.567	-0.708	-1.002	0.599	0.481	-1.286	-0.067	1.189	-0.255	-0.623	1.297	1.77	-1.064	-0.741	2.344	0.229	-2.175	0.357	1.11	-1.255	-1.841	1.037	0.811	-2.268	-0.155	2.176	-0.389	-1.097
0.086	1.239	0.254	-1.16	-0.595	0.014	1.027	-0.638	-0.237	0.777	1.135	0.11	-0.624	1.192	0.373	-1.422	0.029	0.145	-0.775	-1.148	-0.118	0.553	-1.133	-0.298	1.379	-0.062	-0.139	1.378	2.101	0.243	-0.989	2.158	0.557	-2.49	-0.017	0.304	-1.304	-2.019	-0.263	1.081	-2.016	-0.645	2.437	-0.22	-0.27
0.18	1.208	0.431	-0.075	-0.962	0.882	-0.06	-0.276	-1.278	0.207	1.332	-0.278	0.156	0.948	1.101	0.038	-0.46	1.356	-0.173	-1.367	0.313	-0.199	-0.955	-1.037	0.077	0.431	-1.371	0.189	2.369	-0.591	0.132	1.65	1.912	-0.079	-0.676	2.425	-0.253	-2.395	0.48	-0.219	-1.682	-1.868	0.123	0.804	-2.444
0.755	0.939	-0.474	0.071	-0.32	1.244	-0.93	-0.525	-0.732	0.419	0.79	-1.075	1.001	0.988	0.176	0.596	0.172	1.239	-0.48	-0.757	1.116	-1.094	-0.903	-0.15	-0.688	-0.069	-1.214	0.74	1.437	-1.846	1.842	1.625	0.321	1.096	0.209	2.13	-0.651	-1.508	1.953	-1.71	-1.719	-0.446	-1.07	-0.266	-2.202
1.093	0.61	-0.283	-0.09	-0.741	1.029	-1.03	0.146	-0.737	0.721	0.905	-0.796	1.338	0.254	0.269	0.574	-0.558	1.118	-0.753	-0.832	0.826	-1.325	-0.345	-0.287	-0.619	0.615	-1.105	1.323	1.495	-1.495	2.375	0.466	0.484	1.072	-1.007	1.975	-1.278	-1.554	1.446	-2.381	-0.636	-0.493	-1.047	1.198	-1.94
1.177	0.5	-0.216	-0.317	-0.412	1.165	-0.88	-0.072	-0.944	0.944	0.512	-0.889	1.273	0.426	0.484	0.308	-0.142	1.336	-0.909	-0.619	0.864	-1.287	-0.365	-0.424	-0.377	0.229	-1.357	1.734	0.992	-1.532	2.247	0.759	0.787	0.538	-0.316	2.377	-1.56	-1.245	1.497	-2.203	-0.598	-0.802	-0.709	0.369	-2.339
0.122	0.836	-0.94	1.041	-0.334	0.675	-1.17	-0.471	0.281	-0.6	0.733	-0.984	0.824	0.863	-0.776	1.376	0.084	0.24	0.596	-0.721	1.031	-0.792	-0.807	0.808	-1.42	-0.079	-0.284	-0.988	1.198	-1.905	1.48	1.369	-1.415	2.437	0.229	0.377	0.947	-1.256	1.906	-1.386	-1.393	1.479	-2.476	-0.22	-0.479
0.051	1.184	-0.531	0.953	-0.821	-0.195	-1.02	-0.353	0.681	-0.577	1.245	-0.229	0.668	0.992	-0.777	1.224	-0.306	-0.577	0.561	-1.248	0.199	-0.663	-0.957	0.731	-1.25	0.298	0.546	-0.912	2.234	-0.289	1.146	1.694	-1.445	2.223	-0.533	-0.887	1.13	-2.156	0.363	-1.317	-1.652	1.27	-2.233	0.389	1.096
0.069	0.508	-1.167	1.088	-0.344	0.637	-1.135	-0.291	0.514	-0.632	0.462	-1.156	0.76	0.481	-1.058	1.426	-0.018	0.076	0.635	-0.659	1.123	-0.724	-0.573	1.044	-1.412	0.009	-0.066	-1.21	0.988	-1.946	1.467	0.895	-1.799	2.479	0.173	0.145	1.071	-0.977	2.026	-1.342	-0.867	1.818	-2.517	0.087	-0.208
0.035	1.269	-0.294	0.963	-0.527	0.656	-1.016	-0.734	-0.326	-0.6	1.13	-0.574	0.679	1.265	0.016	1.237	0.135	0.652	0.57	-1.127	0.588	-0.675	-1.238	0.031	-1.254	-0.147	-0.627	-1.126	1.953	-0.974	1.089	2.287	0.028	2.197	0.166	1.224	1.138	-1.963	0.952	-1.198	-2.238	-0.078	-2.057	-0.222	-1.238
0.076	0.991	-0.757	1.095	-0.513	0.476	-1.134	-0.457	0.364	-0.632	1.031	-0.657	0.78	0.841	-0.753	1.449	-0.008	0.083	0.632	-0.956	0.816	-0.747	-0.902	0.685	-1.393	0.045	0.02	-1.105	1.832	-1.265	1.299	1.453	-1.496	2.478	0.006	0.174	1.026	-1.753	1.409	-1.296	-1.631	1.248	-2.489	0.044	-0.263
-0.24	0.726	-1.026	1.1	0.088	0.586	-0.92	-0.8	0.45	-0.86	0.386	-1.062	0.398	0.993	-0.879	1.247	0.56	0.116	0.812	-0.398	0.996	-0.522	-0.901	1.018	-1.218	-0.608	-0.167	-1.563	0.593	-1.823	0.868	1.729	-1.557	2.212	0.993	0.192	1.666	-0.659	1.698	-0.843	-1.582	1.836	-2.196	-1.105	-0.369
-0.838	-0.647	-0.745	1.104	0.441	-0.462	-0.251	0.182	1.298	-1.237	-0.642	-0.203	-0.337	-0.589	-1.187	0.838	0.172	-1.065	1.248	0.648	0.207	0.37	0.529	1.341	-0.848	-0.176	1.124	-2.195	-1.132	-0.476	-0.689	-0.907	-2.194	1.542	0.284	-1.881	2.104	1.318	0.174	0.76	0.862	2.249	-1.557	-0.368	1.912
0.3	-0.075	-1.226	0.913	0.051	0.865	-1.246	-0.168	0.366	-0.373	-0.231	-1.337	0.939	0.044	-0.982	1.335	0.046	0.28	0.383	0.024	1.354	-0.986	-0.069	1.016	-1.375	-0.27	-0.319	-0.694	-0.09	-2.361	1.692	0.377	-1.677	2.348	0.373	0.498	0.781	0.106	2.38	-1.703	0.01	1.807	-2.346	-0.321	-0.659
-1.018	-0.494	-0.569	1.164	-0.03	-0.541	-0.111	0.518	1.189	-1.364	-0.294	0	-0.555	-0.634	-1.059	0.808	-0.33	-1.066	1.39	0.283	0.053	0.601	0.576	1.155	-0.798	0.385	1.106	-2.378	-0.539	-0.153	-1.05	-1.158	-1.921	1.437	-0.606	-1.865	2.444	0.398	-0.03	1.014	1.267	1.931	-1.55	0.652	1.85
-0.674	-0.776	-0.731	1.231	0.229	-0.308	-0.536	0.438	1.098	-1.203	-0.678	-0.246	-0.067	-0.806	-1.127	1.139	-0.218	-0.835	1.184	0.64	0.261	0.079	0.745	1.185	-1.084	0.06	0.901	-2.186	-1.145	-0.472	-0.097	-1.2	-2.056	1.945	-0.204	-1.512	2.149	1.097	0.385	0.118	1.433	1.998	-1.977	0.276	1.519
-0.07	-0.901	-0.916	1.103	0.552	0.293	-1.045	0.303	0.652	-0.751	-0.98	-0.735	0.613	-0.719	-0.994	1.342	0.156	-0.241	0.732	0.876	0.798	-0.631	0.762	1.015	-1.335	-0.203	0.227	-1.309	-1.701	-1.267	1.142	-1.339	-1.79	2.372	0.381	-0.332	1.388	1.587	1.261	-1.151	1.454	1.707	-2.413	-0.273	0.352
-0.866	-0.24	-0.911	1.174	0.275	-0.343	-0.38	0.037	1.243	-1.333	-0.282	-0.366	-0.32	-0.163	-1.352	0.941	0.182	-1.029	1.272	0.35	0.377	0.314	0.151	1.368	-1.045	-0.072	0.978	-2.284	-0.576	-0.692	-0.401	-0.338	-2.35	1.713	0.157	-1.827	2.248	0.594	0.727	0.661	0.165	2.367	-1.767	-0.169	1.8
0.247	0.364	-1.195	0.911	0.072	0.929	-1.193	-0.46	0.244	-0.441	0.236	-1.291	0.891	0.455	-0.958	1.305	0.304	0.398	0.417	-0.171	1.357	-0.916	-0.517	0.895	-1.34	-0.365	-0.454	-0.672	0.395	-2.348	1.692	0.771	-1.731	2.307	0.652	0.699	0.695	-0.371	2.38	-1.587	-0.864	1.659	-2.351	-0.528	-0.605
0.261	-0.195	-1.256	0.945	0.038	0.822	-1.208	0.173	0.404	-0.449	-0.178	-1.322	0.942	-0.187	-1.051	1.331	-0.157	0.244	0.455	0.227	1.302	-0.937	0.301	1.011	-1.348	0.032	-0.253	-0.8	-0.316	-2.298	1.66	-0.367	-1.86	2.374	-0.172	0.517	0.762	0.302	2.294	-1.591	0.598	1.855	-2.399	-0.084	-0.438
0.14	-0.187	-1.273	0.951	0.576	0.657	-1.056	-0.44	0.612	-0.494	-0.476	-1.217	0.765	0.117	-1.191	1.294	0.6	0.057	0.511	0.474	1.181	-0.733	-0.24	1.181	-1.261	-0.595	-0.021	-0.967	-0.828	-2.095	1.345	0.275	-2.096	2.171	1.186	0.121	0.885	0.899	2.091	-1.288	-0.3	2.074	-2.229	-1.111	-0.084
-1.016	-0.472	-0.648	0.983	0.606	-0.59	-0.004	-0.141	1.25	-1.287	-0.695	-0.048	-0.636	-0.198	-1.173	0.633	0.462	-1.173	1.231	0.674	0.064	0.629	0.133	1.208	-0.657	-0.393	1.15	-2.257	-1.281	-0.014	-1.069	-0.277	-2.18	1.048	0.853	-2.119	2.14	1.261	0.103	1.286	0.22	2.153	-1.062	-0.758	2.03
-0.448	-1.16	-0.312	0.563	0.686	-0.853	0.01	0.399	1.223	-0.614	-1.195	0.349	-0.217	-0.998	-0.927	0.368	0.18	-1.271	0.711	1.095	-0.329	0.382	0.939	1.027	-0.333	-0.2	1.29	-1.221	-2.052	0.526	-0.436	-1.79	-1.687	0.58	0.508	-2.306	1.1	2.008	-0.65	0.459	1.728	1.686	-0.778	-0.225	2.292
-1.265	-0.185	0.091	0.577	0.119	-1.144	0.666	0.028	1.044	-1.15	-0.232	0.785	-1.235	-0.124	-0.618	-0.054	0.043	-1.394	1.142	0.172	-0.772	1.177	0.204	0.618	0.069	-0.153	1.36	-2.015	-0.301	1.426	-2.229	-0.25	-1.066	-0.123	0.14	-2.445	2.071	0.388	-1.302	2.156	0.479	1.027	0.191	-0.365	2.382
-0.328	-1.174	0.457	-0.906	0.749	-0.51	1.24	0.425	0.033	0.367	-1.166	0.656	-0.981	-1.045	0.211	-1.344	0.225	-0.289	-0.368	1.185	-0.685	0.995	0.974	-0.314	1.344	-0.172	0.373	0.51	-2.101	1.194	-1.671	-1.873	0.269	-2.352	0.454	-0.481	-0.655	2.095	-1.091	1.748	1.746	-0.52	2.407	-0.322	0.677
0.103	-0.888	0.923	-1.047	0.091	-0.742	0.984	0.818	-0.193	0.713	-0.586	1.06	-0.521	-1.081	0.688	-1.249	-0.427	-0.329	-0.717	0.61	-1.071	0.584	1.091	-0.721	1.284	0.442	0.346	1.207	-1.08	1.862	-0.84	-1.983	1.152	-2.299	-0.804	-0.548	-1.313	0.962	-1.931	0.978	2.032	-1.21	2.174	0.823	0.703
-0.561	0.136	1.138	-0.687	0.12	-1.083	1.289	-0.286	-0.045	0.049	-0.079	1.403	-1.109	0.314	0.753	-1.234	0.172	-0.638	-0.065	0.027	-1.411	1.197	-0.158	-0.743	1.258	-0.348	0.659	0.128	0.015	2.465	-1.989	0.704	1.24	-2.115	0.58	-1.094	-0.153	0.142	-2.474	1.978	-0.539	-1.374	2.056	-0.83	1.214
0.129	-1.023	0.751	-0.951	0.843	0.219	0.897	0.276	-0.927	0.682	-1.112	0.373	-0.422	-0.81	1.06	-1.082	0.419	0.755	-0.696	1.198	-0.339	0.457	0.792	-1.11	1.237	-0.26	-0.639	1.148	-2.078	0.538	-0.921	-1.429	1.785	-2.006	0.499	1.349	-1.367	1.999	-0.664	0.813	1.25	-1.998	2.156	-0.467	-1.112
0.671	-0.306	1.057	-1.134	-0.537	-0.222	0.446	0.87	-0.823	1.103	0.206	0.838	0.163	-0.772	1.16	-0.976	-0.92	0.336	-1.17	-0.094	-0.756	-0.171	0.806	-1.156	1.008	0.839	-0.393	2.037	0.242	1.409	0.197	-1.389	2.071	-1.655	-1.69	0.605	-2.08	-0.102	-1.336	-0.345	1.485	-2.018	1.889	1.39	-0.761
0.553	0.194	1.124	-1.174	-0.576	-0.042	0.576	0.487	-1.052	1.029	0.56	0.747	0.018	-0.186	1.374	-1.156	-0.568	0.629	-1.077	-0.505	-0.694	0.027	0.176	-1.375	1.053	0.771	-0.608	1.832	0.9	1.357	-0.027	-0.352	2.412	-1.896	-1.221	1.091	-1.814	-0.861	-1.389	0.175	0.058	-2.423	1.835	1.229	-1.119
0.166	0.306	1.278	0.039	-1.219	-0.396	-0.238	0.922	-0.874	0.051	0.974	1.082	0.246	-0.388	1.343	0.177	-1.3	0.289	-0.105	-1.004	-1.043	-0.305	0.408	-1.341	-0.142	1.328	-0.312	0.303	1.73	1.755	0.44	-0.816	2.35	0.39	-2.318	0.538	-0.243	-1.728	-1.795	-0.492	0.721	-2.387	-0.319	2.392	-0.48
-1.188	-0.024	0.397	0.634	-1.118	-0.222	0.596	1.162	-0.204	-1.136	0.688	0.429	-1.094	-0.728	0.319	0.042	-1.442	-0.036	1.158	-0.67	-0.391	1.142	0.752	-0.401	-0.012	1.449	0.012	-2.097	1.128	0.808	-2.015	-1.26	0.531	0.021	-2.516	0.057	2.066	-1.193	-0.702	2.021	1.256	-0.606	-0.097	2.538	-0.022
0.051	0.941	-0.868	-0.862	0.074	0.946	0.814	-0.964	-0.037	0.564	0.568	-1.107	-0.467	1.215	-0.523	-1.076	0.664	0.647	-0.55	-0.517	1.144	0.51	-1.185	0.533	1.027	-0.623	-0.597	1.015	0.874	-2.028	-0.836	2.183	-0.967	-1.871	1.189	1.153	-1.026	-1.027	1.943	0.903	-2.133	0.921	1.807	-1.207	-1.119
-0.859	0.822	-0.366	0.126	-0.25	1.266	0.697	-0.605	-0.89	-0.634	0.665	-1.036	-0.993	0.876	0.338	-0.403	0.216	1.376	0.642	-0.688	1.017	0.972	-0.911	-0.313	0.331	-0.235	-1.358	-1.218	1.19	-1.724	-1.578	1.671	0.593	-0.671	0.434	2.374	1.082	-1.253	1.81	1.767	-1.545	-0.709	0.703	-0.419	-2.368
-0.556	0.361	1.086	1.17	-0.561	0.02	-0.662	0.145	-1.101	-1.135	0.603	0.668	0.079	0.074	1.379	1.137	-0.484	0.733	1.066	-0.591	-0.694	-0.093	-0.132	-1.396	-1.17	0.4	-0.678	-1.9	1.013	1.194	0.106	0.258	2.453	2.048	-0.771	1.208	1.925	-0.909	-1.157	-0.134	-0.134	-2.441	-1.931	0.673	-1.269
-0.175	0.707	1.102	0.778	-1.039	-0.02	-0.496	0.417	-1.07	-0.581	1.134	0.713	0.26	0.213	1.36	0.898	-0.851	0.668	0.602	-1.092	-0.701	-0.152	-0.157	-1.38	-0.775	0.953	-0.632	-0.95	1.925	1.273	0.249	0.276	2.488	1.284	-1.766	1.147	0.936	-1.924	-1.27	-0.389	-0.308	-2.428	-1.382	1.596	-1.237
-0.668	0.828	0.677	0.841	-0.741	0.578	-0.198	-0.06	-1.284	-0.906	1.012	0.052	-0.353	0.539	1.213	0.643	-0.444	1.195	0.944	-0.947	-0.101	0.287	-0.547	-1.255	-0.674	0.451	-1.173	-1.621	1.807	0.292	-0.623	1.089	2.122	1.206	-0.761	2.039	1.608	-1.803	-0.145	0.539	-1.153	-2.119	-1.051	0.756	-2.119
0.274	0.854	0.933	0.747	-1.059	-0.165	-0.919	0.281	-0.811	-0.288	1.235	0.705	0.823	0.391	1.046	1.088	-0.817	0.405	0.337	-1.175	-0.719	-0.702	-0.316	-1.126	-1.016	0.863	-0.414	-0.649	2.143	1.202	1.353	0.53	2.027	1.868	-1.475	0.752	0.441	-2.129	-1.266	-1.378	-0.683	-1.941	-1.876	1.434	-0.672
0.546	-0.24	1.178	0.448	-0.564	-1.051	-0.978	0.851	-0.143	0.071	0.251	1.388	0.966	-0.695	0.834	0.898	-0.854	-0.588	-0.046	-0.203	-1.404	-0.985	0.68	-0.833	-0.868	0.93	0.563	0.058	0.26	2.458	1.674	-1.184	1.487	1.55	-1.58	-0.979	-0.115	-0.399	-2.439	-1.669	1.15	-1.47	-1.534	1.641	0.983
0.67	0.159	1.078	0.277	-0.974	-0.779	-0.945	0.852	-0.327	0.23	0.69	1.221	1.028	-0.38	0.815	0.76	-1.137	-0.308	-0.23	-0.698	-1.166	-0.976	0.462	-0.919	-0.807	1.151	0.29	0.456	1.127	2.182	1.859	-0.721	1.394	1.399	-1.935	-0.574	-0.552	-1.345	-1.975	-1.787	0.81	-1.541	-1.379	1.975	0.581
-0.04	0.783	1.004	0.925	-0.844	-0.076	-0.9	0.032	-0.935	-0.617	1.025	0.703	0.541	0.451	1.197	1.115	-0.58	0.534	0.618	-1.018	-0.677	-0.568	-0.508	-1.199	-1.125	0.564	-0.575	-1.231	1.818	1.206	1.102	0.833	2.087	2.009	-1.028	0.97	1.228	-1.721	-1.232	-0.977	-0.872	-2.149	-2.096	1.035	-0.865
0.557	0.789	0.832	-0.253	-1.215	0.365	-0.343	0.392	-1.182	0.466	1.24	0.333	0.585	0.234	1.242	0.081	-1.051	0.944	-0.547	-1.244	-0.258	-0.626	-0.236	-1.254	-0.051	0.976	-0.972	0.776	2.269	0.571	1.079	0.552	2.162	0.075	-1.855	1.652	-1.04	-2.186	-0.403	-0.872	-0.395	-2.299	0.075	1.696	-1.718
0.48	0.941	0.739	0.351	-1.226	0.249	-0.723	0.271	-1.026	0.065	1.34	0.342	0.854	0.425	1.058	0.692	-0.944	0.815	-0.002	-1.365	-0.357	-0.649	-0.448	-1.159	-0.704	0.96	-0.791	0.063	2.428	0.542	1.389	0.843	1.864	1.041	-1.717	1.478	-0.182	-2.425	-0.513	-1.165	-0.774	-2.06	-1.402	1.678	-1.22
0.384	0.601	1.089	-0.126	-1.278	0.006	-0.22	0.684	-1.083	0.36	1.187	0.669	0.37	-0.05	1.384	0.036	-1.215	0.71	-0.267	-1.199	-0.699	-0.358	0.047	-1.352	-0.053	1.244	-0.684	0.72	2.069	1.19	0.484	-0.1	2.466	-0.055	-2.165	1.218	-0.456	-2.093	-1.196	-0.755	0.156	-2.348	-0.027	2.119	-1.358
0.713	0.779	0.751	-1.096	-0.48	0.434	0.392	-0.299	-1.156	1.142	0.817	0.213	0.215	0.646	1.211	-0.898	-0.168	1.046	-1.177	-0.725	-0.228	-0.196	-0.643	-1.203	0.935	0.073	-0.971	1.972	1.451	0.327	0.292	1.23	2.104	-1.605	-0.371	1.824	-1.99	-1.393	-0.365	-0.34	-1.1	-2.149	1.649	0.183	-1.81
-0.282	0.683	1.036	-0.679	-1.05	-0.233	0.918	0.443	-0.84	0.252	1.109	0.82	-0.797	0.201	1.125	-1.091	-0.9	0.326	-0.195	-1.073	-0.761	0.791	-0.146	-1.179	0.94	0.988	-0.419	0.557	1.896	1.515	-1.329	0.133	2.071	-1.845	-1.655	0.552	-0.364	-1.958	-1.405	1.402	-0.303	-2.048	1.68	1.709	-0.597
1.22	0.478	-0.004	-0.434	-0.779	0.961	-0.812	0.299	-0.961	1.045	0.788	-0.587	1.257	0.108	0.574	0.239	-0.713	1.192	-1.062	-0.762	0.619	-1.273	-0.086	-0.616	-0.269	0.66	-1.191	1.801	1.483	-1.017	2.268	0.195	1.06	0.467	-1.29	2.121	-1.866	-1.257	1.13	-2.198	-0.272	-1.153	-0.41	1.145	-2.133
0.888	0.878	-0.164	-0.306	-0.347	1.201	-0.704	-0.427	-1.003	0.723	0.827	-0.83	0.943	0.844	0.532	0.229	0.046	1.387	-0.821	-0.685	0.883	-1.069	-0.783	-0.503	-0.294	-0.002	-1.39	1.255	1.33	-1.504	1.828	1.441	0.817	0.454	0.08	2.425	-1.297	-1.429	1.543	-1.706	-1.491	-0.905	-0.245	-0.179	-2.454
1.1	0.551	0.31	-0.478	-0.948	0.728	-0.638	0.44	-1.028	1.031	0.94	-0.268	1.044	0.116	0.852	0.081	-0.805	1.107	-0.971	-0.984	0.265	-1.093	-0.105	-0.835	-0.13	0.939	-1.097	1.863	1.44	-0.514	1.835	0.209	1.568	0.002	-1.474	1.921	-1.759	-1.692	0.523	-1.74	-0.268	-1.671	-0.163	1.686	-1.851
0.32	1.223	0.223	0.633	-0.949	0.592	-0.968	-0.273	-0.815	-0.158	1.377	-0.269	0.771	0.934	0.679	0.993	-0.405	0.878	0.193	-1.385	0.247	-0.807	-0.982	-0.656	-1.028	0.464	-0.878	-0.411	2.471	-0.385	1.372	1.577	1.258	1.786	-0.769	1.519	0.439	-2.399	0.368	-1.492	-1.649	-1.102	-1.659	0.766	-1.66
0.374	1.118	0.502	0.279	-1.088	0.6	-0.573	-0.033	-1.139	0.135	1.407	-0.086	0.584	0.705	1.03	0.552	-0.694	1.1	-0.022	-1.363	0.03	-0.536	-0.737	-1.05	-0.524	0.675	-1.112	0.122	2.446	-0.196	0.991	1.267	1.91	1.037	-1.201	1.973	-0.16	-2.39	0.066	-1.025	-1.235	-1.839	-1.154	1.12	-1.825
1.106	0.681	-0.051	0.022	-1.303	0.274	-1.105	0.576	-0.246	0.695	1.235	-0.156	1.394	0.044	0.047	0.714	-1.234	0.265	-0.666	-1.231	0.256	-1.379	-0.028	-0.129	-0.703	1.106	-0.336	1.191	2.209	-0.253	2.476	0.137	0.231	1.294	-2.127	0.451	-1.291	-2.14	0.436	-2.477	0.019	-0.285	-1.247	2.011	-0.527
0.915	0.119	0.86	-0.787	-1.052	0.042	-0.169	0.893	-0.886	1.094	0.68	0.458	0.627	-0.47	1.167	-0.418	-1.234	0.607	-1.078	-0.752	-0.525	-0.696	0.494	-1.108	0.374	1.186	-0.561	1.967	1.286	0.815	1.165	-0.731	2.033	-0.714	-2.101	1.08	-1.792	-1.4	-0.971	-1.243	0.9	-1.965	0.713	2.141	-1.028
0.589	0.458	1.054	0.166	-1.195	-0.363	-0.696	0.765	-0.723	0.299	1.076	0.869	0.814	-0.202	1.113	0.623	-1.228	0.166	-0.291	-1.017	-0.867	-0.801	0.18	-1.121	-0.504	1.258	-0.237	0.416	1.792	1.696	1.553	-0.37	1.899	0.967	-2.27	0.477	-0.648	-1.849	-1.497	-1.47	0.385	-1.98	-0.957	2.244	-0.519
-0.263	-0.168	1.232	-0.755	-0.499	-0.86	1.038	0.7	-0.354	0.311	0.251	1.31	-0.808	-0.563	1.016	-1.116	-0.72	-0.306	-0.301	-0.215	-1.315	0.83	0.505	-1.005	1.134	0.822	0.344	0.55	0.476	2.347	-1.409	-1.1	1.774	-1.972	-1.32	-0.583	-0.625	-0.416	-2.32	1.33	0.946	-1.853	2.077	1.335	0.591
0.426	-0.592	1.081	-1.172	-0.233	-0.407	0.77	0.841	-0.637	1.003	-0.209	0.956	-0.203	-0.908	1.086	-1.162	-0.681	0.161	-1.034	0.241	-0.922	0.218	0.936	-1.019	1.236	0.661	-0.174	1.807	-0.378	1.667	-0.322	-1.589	1.926	-2.209	-1.14	0.144	-1.89	0.373	-1.591	0.381	1.559	-1.91	2.175	1.136	-0.322
0.273	-0.944	0.797	-1.219	0.318	-0.203	0.965	0.567	-0.701	0.952	-0.811	0.592	-0.433	-0.987	0.888	-1.356	-0.165	0.315	-0.944	0.764	-0.71	0.455	0.961	-0.926	1.372	0.098	-0.41	1.668	-1.354	1.256	-0.802	-1.615	1.696	-2.411	-0.232	0.699	-1.658	1.315	-1.228	0.667	1.815	-1.579	2.491	0.21	-0.593
0.123	0.229	1.254	-1.115	-0.46	-0.462	1.007	0.165	-0.798	0.763	0.467	1.069	-0.532	-0.034	1.298	-1.309	-0.386	0.203	-0.788	-0.485	-1.077	0.556	-0.048	-1.301	1.347	0.328	-0.206	1.362	0.75	1.881	-0.924	0.008	2.308	-2.29	-0.777	0.362	-1.533	-0.741	-1.869	1.062	0.093	-2.273	2.287	0.825	-0.394
0.757	-0.475	0.865	-1.283	-0.321	-0.001	0.47	0.803	-0.875	1.239	-0.094	0.546	0.183	-0.81	1.08	-1.121	-0.706	0.569	-1.312	0.098	-0.581	-0.214	0.786	-1.116	1.094	0.746	-0.526	2.26	-0.179	0.945	0.359	-1.307	2.024	-1.887	-1.29	1.153	-2.258	0.259	-1.05	-0.254	1.338	-2.011	1.912	1.162	-1.034
0.51	-0.755	0.91	-1.285	-0.085	-0.243	0.709	0.886	-0.587	1.091	-0.422	0.763	-0.138	-0.999	0.966	-1.274	-0.6	0.269	-1.164	0.446	-0.707	0.12	1.028	-0.933	1.208	0.656	-0.167	1.967	-0.736	1.262	-0.146	-1.833	1.651	-2.165	-1.067	0.319	-1.982	0.706	-1.377	0.313	1.621	-1.785	2.169	1.2	-0.26
-0.622	-1.101	0.213	-0.092	0.587	-1.124	0.698	0.555	0.939	-0.325	-1.05	0.844	-0.867	-1.02	-0.436	-0.484	0.007	-1.295	0.32	1.108	-0.814	0.786	1.083	0.508	0.531	-0.031	1.262	-0.423	-1.962	1.523	-1.429	-1.823	-0.877	-0.839	-0.051	-2.325	0.403	1.93	-1.56	1.46	1.878	0.845	0.868	-0.069	2.325
-0.479	-1.172	-0.079	-0.226	0.837	-0.971	0.703	0.346	0.996	-0.141	-1.253	0.506	-0.766	-0.961	-0.669	-0.642	0.325	-1.25	0.208	1.268	-0.586	0.738	0.972	0.678	0.597	-0.326	1.193	-0.181	-2.151	0.995	-1.394	-1.738	-1.094	-0.986	0.396	-2.243	0.315	2.235	-0.955	1.327	1.698	1.181	0.924	-0.464	2.245
-0.548	-1.123	0.371	-0.144	0.378	-1.244	0.566	0.75	0.825	-0.305	-0.935	0.992	-0.748	-1.191	-0.302	-0.562	-0.224	-1.299	0.274	0.939	-1.051	0.671	1.18	0.268	0.372	0.243	1.281	-0.395	-1.554	1.838	-1.215	-2.124	-0.465	-0.76	-0.409	-2.322	0.474	1.665	-1.794	1.324	2.052	0.615	0.872	0.359	2.24
-1.173	-0.488	0.225	0.644	-0.322	-1.077	0.483	0.781	0.865	-1.162	-0.137	0.837	-1.051	-0.8	-0.395	0.022	-0.698	-1.237	1.185	0.084	-0.792	1.052	0.808	0.414	-0.152	0.676	1.203	-2.071	-0.119	1.391	-1.859	-1.312	-0.834	0.198	-1.205	-2.217	2.068	0.206	-1.431	1.866	1.371	0.858	-0.095	1.127	2.202
-0.91	0.127	0.889	0.407	-1.187	-0.343	0.541	1.039	-0.516	-0.857	0.805	0.768	-0.86	-0.57	0.909	-0.044	-1.426	0.154	0.815	-0.822	-0.796	0.946	0.572	-0.87	0.09	1.393	-0.094	-1.467	1.469	1.366	-1.573	-0.986	1.607	-0.179	-2.477	0.179	1.509	-1.388	-1.385	1.555	0.981	-1.641	0.066	2.45	-0.197
-0.736	-0.49	0.905	0.967	-0.687	-0.502	-0.209	1.205	-0.41	-1.046	0.13	0.886	-0.345	-1.05	0.824	0.722	-1.143	-0.068	1.111	-0.142	-0.882	0.334	1.099	-0.829	-0.723	1.172	0.053	-1.935	0.242	1.546	-0.496	-1.949	1.45	1.165	-2.162	-0.015	1.964	-0.263	-1.631	0.618	2.013	-1.389	-1.37	2.053	0.056
-0.123	-0.249	1.272	0.439	-0.903	-0.815	-0.287	1.148	-0.468	-0.37	0.407	1.292	0.133	-0.879	1.104	0.462	-1.29	-0.207	0.373	-0.416	-1.33	-0.066	0.867	-1.097	-0.462	1.3	0.213	-0.627	0.709	2.292	0.274	-1.534	2.021	0.861	-2.31	-0.458	0.537	-0.673	-2.266	-0.235	1.553	-1.917	-0.88	2.266	0.354
-0.237	-0.202	1.262	0.854	-0.699	-0.594	-0.606	0.931	-0.644	-0.628	0.364	1.227	0.203	-0.736	1.164	0.94	-1.017	0.05	0.667	-0.291	-1.173	-0.252	0.686	-1.207	-0.904	1.065	-0.004	-1.338	0.534	2.073	0.288	-1.322	2.035	1.67	-1.794	0.043	1.243	-0.669	-2.007	-0.444	1.15	-2.148	-1.445	2.029	-0.055
-1.071	0.161	0.687	0.637	-1.095	0.031	0.449	0.973	-0.698	-1.091	0.821	0.444	-0.937	-0.505	0.852	0.12	-1.307	0.445	1.092	-0.745	-0.381	1.004	0.509	-0.861	-0.154	1.322	-0.451	-1.837	1.449	0.843	-1.67	-1.044	1.463	0.167	-2.336	0.806	1.837	-1.49	-0.773	1.693	0.934	-1.644	-0.224	2.394	-0.743
-0.777	-0.875	0.467	1.266	-0.17	0.089	-0.463	1.095	-0.571	-1.247	-0.422	0.224	-0.208	-1.221	0.66	1.118	-0.776	0.422	1.272	0.465	-0.257	0.202	1.286	-0.626	-1.074	0.787	-0.46	-2.286	-0.869	0.304	-0.444	-2.16	1.222	1.963	-1.354	0.721	2.262	0.686	-0.388	0.384	2.194	-1.115	-1.941	1.385	-0.707
-1.026	-0.767	-0.29	0.345	0.191	1.247	0.683	0.562	-0.943	-0.855	-0.627	-0.969	-1.087	-0.832	0.419	-0.223	-0.216	1.366	0.871	0.591	0.99	1.092	0.808	-0.42	0.207	0.243	-1.354	-1.446	-1.074	-1.723	-1.922	-1.345	0.78	-0.451	-0.356	2.421	1.637	0.82	1.711	1.837	1.57	-0.795	0.339	0.417	-2.425
-0.917	-0.223	0.908	0.81	0.966	0.127	0.027	-0.703	-1.083	-1.128	-0.709	0.455	-0.612	0.296	1.253	0.446	1.101	0.71	1.077	0.732	-0.471	0.564	-0.283	-1.273	-0.538	-1.04	-0.787	-1.967	-1.359	0.814	-0.998	0.532	2.273	0.909	1.813	1.35	1.864	1.301	-0.916	1.194	-0.508	-2.067	-0.811	-1.874	-1.342
-1.175	-0.337	0.422	0.411	1.213	0.084	0.728	-0.859	-0.536	-1.013	-0.988	0.17	-1.201	0.347	0.621	-0.21	1.321	0.379	0.977	0.973	-0.219	1.17	-0.345	-0.611	0.193	-1.267	-0.412	-1.869	-1.642	0.345	-2.095	0.579	1.129	-0.347	2.342	0.635	1.834	1.655	-0.383	2.155	-0.641	-0.913	0.405	-2.334	-0.741
-0.761	-0.151	1.018	1.131	0.64	0.135	-0.308	-0.515	-1.161	-1.181	-0.501	0.528	-0.25	0.222	1.391	0.899	0.717	0.797	1.251	0.481	-0.537	0.298	-0.236	-1.379	-0.869	-0.745	-0.816	-2.181	-0.822	0.956	-0.417	0.25	2.485	1.563	1.264	1.403	2.04	0.986	-0.996	0.443	-0.414	-2.427	-1.597	-1.2	-1.402
-0.688	0.713	0.808	1.265	0.345	-0.24	-0.536	-1.036	-0.571	-1.193	0.241	0.656	-0.095	1.098	0.873	1.116	0.907	0.14	1.279	-0.232	-0.602	0.145	-1.114	-0.818	-1.153	-0.847	-0.256	-2.122	0.539	1.065	-0.287	1.928	1.574	1.963	1.531	0.393	2.184	-0.662	-1.084	0.213	-1.977	-1.45	-2.049	-1.413	-0.489
-0.304	1.178	0.464	1.248	-0.367	-0.071	-0.908	-0.793	-0.425	-0.955	0.972	0.267	0.392	1.252	0.605	1.374	0.281	0.229	0.986	-0.973	-0.38	-0.359	-1.234	-0.585	-1.353	-0.255	-0.214	-1.752	1.729	0.478	0.622	2.184	1.111	2.362	0.44	0.636	1.729	-1.673	-0.688	-0.65	-2.159	-1.106	-2.396	-0.564	-0.354
-0.457	0.992	0.627	1.294	-0.185	-0.04	-0.819	-0.83	-0.562	-1.085	0.738	0.422	0.233	1.125	0.779	1.338	0.406	0.303	1.11	-0.752	-0.379	-0.231	-1.186	-0.705	-1.324	-0.383	-0.362	-1.908	1.369	0.585	0.251	2.061	1.309	2.293	0.733	0.609	1.964	-1.378	-0.748	-0.351	-2.057	-1.289	-2.289	-0.676	-0.525
-0.065	0.818	0.981	1.032	-0.667	-0.19	-0.984	-0.171	-0.814	-0.728	0.919	0.751	0.601	0.626	1.095	1.25	-0.286	0.356	0.695	-0.978	-0.717	-0.59	-0.64	-1.167	-1.265	0.312	-0.371	-1.22	1.689	1.375	1.061	1.036	1.975	2.243	-0.54	0.7	1.252	-1.64	-1.3	-0.972	-1.025	-2.08	-2.326	0.527	-0.617
-0.456	0.633	0.937	1.025	-0.763	0.216	-0.622	0.076	-1.14	-0.952	0.829	0.464	0.09	0.344	1.304	0.944	-0.608	0.885	0.983	-0.831	-0.472	-0.061	-0.296	-1.356	-1.13	0.433	-0.795	-1.576	1.638	0.802	0.07	0.725	2.336	1.748	-0.995	1.498	1.751	-1.556	-0.856	0.017	-0.573	-2.407	-1.885	0.888	-1.403
0.849	-0.4	0.925	0.388	0.199	-1.218	-1.208	0.133	0.303	0.291	-0.477	1.34	1.313	-0.294	0.405	1.03	0.03	-0.958	-0.289	0.33	-1.342	-1.308	0.322	-0.353	-0.967	-0.074	0.931	0.475	-0.669	2.398	2.333	-0.488	0.699	1.769	0.242	-1.759	-0.559	0.609	-2.298	-2.325	0.545	-0.683	-1.762	-0.077	1.62
1.092	0.439	0.504	-0.104	-0.135	-1.287	-1.003	-0.345	0.735	0.775	0.317	1.107	1.293	0.496	-0.163	0.589	0.101	-1.313	-0.788	-0.351	-1.118	-1.322	-0.521	0.137	-0.583	-0.14	1.237	1.205	0.756	2.033	2.35	0.889	-0.26	1.01	0.17	-2.285	-1.314	-0.676	-1.995	-2.32	-0.82	0.362	-0.894	-0.222	2.258
0.993	0.461	0.669	-0.499	0.692	-0.981	-0.508	-1.12	0.324	0.928	-0.096	1.092	0.948	0.974	0.17	0.053	1.112	-0.875	-0.998	0.198	-0.968	-0.944	-0.971	-0.243	-0.019	-1.139	0.85	1.657	-0.264	1.853	1.632	1.707	0.375	0.077	1.971	-1.589	-1.692	0.297	-1.792	-1.688	-1.751	-0.277	0.046	-2.037	1.403
0.814	0.878	0.532	-0.721	0.33	-0.99	-0.103	-1.193	0.444	1.029	0.317	0.936	0.521	1.34	0.064	-0.48	0.967	-0.838	-0.894	-0.334	-1.025	-0.57	-1.304	-0.079	0.371	-0.953	0.908	1.759	0.548	1.729	0.806	2.378	0.095	-0.803	1.681	-1.556	-1.454	-0.709	-1.826	-0.992	-2.269	-0.107	0.706	-1.663	1.699
1.199	-0.137	0.502	-0.2	0.786	-1.02	-0.951	-0.689	0.487	0.912	-0.609	0.964	1.349	0.354	-0.009	0.468	0.916	-0.981	-0.834	0.56	-0.951	-1.307	-0.381	-0.041	-0.475	-0.935	0.945	1.691	-1.105	1.562	2.333	0.601	0.025	0.737	1.687	-1.671	-1.539	1.034	-1.657	-2.407	-0.539	0.082	-0.927	-1.582	1.731
1.147	0.199	-0.599	-1.082	0.258	-0.624	-0.03	-0.493	1.197	1.444	-0.023	0.013	0.727	0.384	-1.151	-0.662	0.437	-1.152	-1.379	0.052	-0.026	-0.728	-0.435	1.106	0.683	-0.505	1.148	2.502	0.025	0.114	1.261	0.793	-2.02	-1.176	0.721	-2.051	-2.447	0.103	-0.028	-1.347	-0.771	2	1.124	-0.782	2.048
0.963	0.427	-0.709	-1.175	0.219	-0.404	0.2	-0.623	1.116	1.37	0.162	-0.205	0.449	0.662	-1.129	-0.858	0.508	-0.954	-1.361	-0.099	0.19	-0.502	-0.698	1.151	0.873	-0.48	0.955	2.386	0.122	-0.395	0.81	1.094	-2.036	-1.495	0.93	-1.757	-2.414	-0.144	0.432	-0.884	-1.198	2.022	1.626	-0.858	1.726
1.173	0.124	-0.434	-1.044	0.24	-0.746	-0.181	-0.285	1.246	1.362	-0.031	0.231	0.846	0.285	-1.043	-0.55	0.31	-1.234	-1.426	0.151	-0.161	-0.884	-0.166	1.097	0.531	-0.363	1.266	2.413	-0.289	0.25	1.568	0.47	-1.799	-0.942	0.565	-2.221	-2.462	0.133	-0.415	-1.534	-0.44	1.904	1.077	-0.626	2.125
0.893	-0.506	-0.757	-1.238	0.07	-0.4	0.322	0.595	1.119	1.353	-0.265	-0.271	0.333	-0.667	-1.162	-1.003	-0.301	-0.968	-1.332	0.46	0.207	-0.364	0.741	1.181	0.958	0.406	0.923	2.313	-0.655	-0.418	0.648	-1.314	-2.058	-1.765	-0.679	-1.635	-2.394	0.578	0.38	-0.532	1.166	2.196	1.784	0.529	1.625
0.813	-0.981	0.069	-1.035	-0.091	-0.757	0.161	1.038	0.744	1.11	-0.576	0.541	0.423	-1.278	-0.419	-0.77	-0.718	-0.935	-1.196	0.544	-0.483	-0.469	1.228	0.511	0.759	0.72	0.916	1.973	-1.018	1.007	0.758	-2.225	-0.686	-1.192	-1.204	-1.789	-2.092	0.931	-0.864	-0.781	2.207	0.831	1.48	1.389	1.37
1.085	-0.466	0.438	-1.12	-0.227	0.621	-0.01	0.745	-1.042	1.374	-0.065	-0.057	0.666	-0.811	0.883	-0.7	-0.619	1.012	-1.419	0.194	0.16	-0.713	0.778	-0.93	0.684	0.644	-1.03	2.432	-0.145	-0.094	1.272	-1.462	1.555	-1.188	-0.989	1.88	-2.497	0.19	0.197	-1.105	1.325	-1.676	1.194	0.961	-1.901
1.132	-0.12	-0.536	-0.191	-0.488	1.173	-0.984	0.583	-0.632	0.77	0.164	-1.1	1.357	-0.399	0.088	0.496	-0.621	1.156	-0.862	-0.292	1.064	-1.344	0.355	-0.066	-0.518	0.731	-1.131	1.538	0.355	-1.84	2.357	-0.664	0.062	0.959	-1.129	1.949	-1.525	-0.611	1.889	-2.392	0.782	-0.083	-0.837	1.329	-1.987
1.268	0.154	0.089	-0.696	-0.423	0.974	-0.606	0.272	-1.1	1.222	0.398	-0.579	1.161	-0.088	0.74	-0.067	-0.437	1.263	-1.258	-0.378	0.563	-1.186	0.081	-0.759	0.046	0.432	-1.315	2.236	0.469	-0.962	2.114	-0.177	1.349	-0.048	-0.705	2.291	-2.141	-0.507	1.113	-2.118	0.153	-1.302	0.039	0.759	-2.402
0.745	0.533	-0.859	0.492	-0.598	0.993	-1.311	0.057	-0.163	0.104	0.73	-1.143	1.285	0.279	-0.48	1.08	-0.42	0.721	-0.157	-0.711	1.146	-1.312	-0.358	0.431	-1.175	0.46	-0.743	0.415	1.285	-2.023	2.27	0.456	-0.839	1.978	-0.689	1.283	-0.277	-1.291	2.122	-2.248	-0.587	0.826	-1.963	0.846	-1.301
0.248	0.141	-1.251	0.953	-0.238	0.808	-1.228	0.057	0.405	-0.477	0.16	-1.297	0.946	0.093	-1.067	1.354	-0.213	0.234	0.447	-0.229	1.289	-0.949	-0.069	1.04	-1.383	0.164	-0.288	-0.799	0.478	-2.293	1.632	0.14	-1.852	2.389	-0.411	0.469	0.779	-0.465	2.257	-1.527	0.017	1.967	-2.411	0.334	-0.459
0.645	0.733	-0.835	0.615	-0.786	0.827	-1.24	0.077	0.052	0.034	0.918	-1.098	1.186	0.459	-0.483	1.18	-0.521	0.508	-0.017	-0.974	1.049	-1.181	-0.395	0.564	-1.154	0.571	-0.437	-0.012	1.591	-1.98	2.139	0.941	-0.75	2.17	-0.755	0.963	-0.138	-1.729	1.845	-2.112	-0.94	0.801	-2.094	0.833	-0.983
0.781	0.204	-1.005	0.409	-0.688	1.007	-1.197	0.47	-0.021	0.228	0.551	-1.28	1.256	-0.171	-0.61	1.018	-0.724	0.676	-0.244	-0.568	1.216	-1.274	0.154	0.596	-0.999	0.726	-0.644	0.367	1.073	-2.221	2.138	-0.33	-1.222	1.763	-1.265	1.261	-0.421	-1.094	2.199	-2.178	0.25	1.15	-1.653	1.399	-1.123
0.341	0.422	-1.161	0.86	-0.577	0.747	-1.228	0.149	0.376	-0.311	0.637	-1.235	0.945	0.168	-0.964	1.305	-0.438	0.242	0.325	-0.642	1.166	-1.012	-0.206	0.939	-1.316	0.465	-0.238	-0.506	1.045	-2.154	1.758	0.261	-1.631	2.316	-0.843	0.463	0.485	-1.199	2.05	-1.738	-0.274	1.729	-2.25	1.026	-0.368
1.244	0.135	-0.381	-0.276	-0.155	1.255	-0.943	-0.047	-0.868	0.968	0.153	-1.042	1.389	0.102	0.319	0.431	-0.085	1.34	-0.954	-0.24	1.03	-1.349	-0.146	-0.314	-0.427	0.058	-1.319	1.66	0.392	-1.871	2.387	0.062	0.651	0.796	0.136	2.353	-1.693	-0.277	1.824	-2.393	-0.194	-0.622	-0.815	0.039	-2.351
1.132	-0.142	-0.585	-0.052	0.314	1.259	-1.056	-0.19	-0.682	0.762	-0.35	-1.147	1.376	0.079	0.041	0.64	0.321	1.235	-0.729	0.266	1.139	-1.378	-0.006	-0.054	-0.614	-0.352	-1.233	1.327	-0.545	-2.073	2.423	0.11	0.157	1.015	0.664	2.176	-1.283	0.457	2.052	-2.445	-0.064	-0.103	-1.095	-0.581	-2.189
0.841	-0.953	0.18	-0.695	0.395	0.994	-0.165	0.516	-1.141	1	-0.841	-0.509	0.581	-0.969	0.85	-0.398	-0.137	1.373	-0.914	0.886	0.512	-0.644	0.922	-0.835	0.327	0.039	-1.31	1.785	-1.4	-0.89	1.083	-1.639	1.484	-0.695	-0.332	2.353	-1.633	1.605	0.868	-1.062	1.75	-1.482	0.569	0.117	-2.413
0.516	-0.729	0.883	-0.134	1.273	0.187	-0.454	-0.53	-1.065	0.399	-1.249	0.45	0.553	-0.13	1.219	0.243	1.128	0.764	-0.493	1.282	-0.414	-0.716	0.124	-1.21	-0.157	-1.12	-0.797	0.8	-2.261	0.764	1.167	-0.126	2.151	0.288	1.979	1.51	-0.774	2.197	-0.85	-1.14	0.169	-2.218	-0.17	-1.993	-1.37
0.542	-0.34	1.113	-0.369	1.253	-0.155	-0.188	-0.914	-0.92	0.539	-0.987	0.823	0.492	0.342	1.271	-0.133	1.337	0.468	-0.575	1.025	-0.739	-0.491	-0.352	-1.25	0.132	-1.368	-0.482	0.993	-1.625	1.543	0.722	0.528	2.266	-0.199	2.397	0.727	-0.896	1.816	-1.498	-0.78	-0.702	-2.246	0.197	-2.412	-0.882
-0.101	-0.399	1.223	0.148	1.23	-0.244	0.019	-0.821	-1.02	-0.121	-1.038	0.93	-0.058	0.287	1.388	0.11	1.299	0.441	0.178	1.026	-0.916	0.069	-0.276	-1.438	-0.023	-1.274	-0.5	-0.313	-1.9	1.547	-0.163	0.544	2.422	0.024	2.256	0.944	0.357	1.82	-1.58	0.063	-0.474	-2.5	-0.124	-2.27	-0.738
0.689	-1.027	0.255	-0.299	0.878	0.915	-0.383	0.182	-1.185	0.661	-1.19	-0.42	0.653	-0.732	0.899	0.023	0.44	1.341	-0.595	1.224	0.377	-0.656	0.753	-0.885	-0.069	-0.417	-1.348	0.978	-2.182	-0.637	1.168	-1.439	1.51	0.068	0.68	2.397	-0.982	2.179	0.757	-1.068	1.439	-1.626	-0.181	-0.756	-2.366
0.64	-0.989	0.395	-0.542	0.801	0.838	-0.138	0.253	-1.273	0.764	-1.034	-0.316	0.429	-0.826	1.058	-0.309	0.363	1.329	-0.714	1.163	0.246	-0.498	0.817	-1.036	0.231	-0.329	-1.375	1.492	-1.871	-0.458	0.815	-1.508	1.824	-0.437	0.558	2.403	-1.379	1.948	0.48	-0.937	1.356	-1.806	0.542	-0.637	-2.346
-0.217	-0.83	0.97	0.152	1.3	0.209	0.124	-0.455	-1.162	-0.128	-1.338	0.481	-0.267	-0.227	1.35	0.003	1.133	0.882	0.289	1.328	-0.484	0.251	0.251	-1.335	-0.008	-1.112	-0.855	-0.426	-2.29	0.864	-0.48	-0.502	2.357	0.113	1.919	1.58	0.348	2.329	-0.938	0.518	0.461	-2.341	-0.213	-1.952	-1.562
-0.439	0.313	1.151	0.187	0.931	-0.843	0.262	-1.271	-0.342	-0.415	-0.404	1.217	-0.42	0.994	0.946	0.039	1.375	-0.3	0.322	0.376	-1.292	0.393	-1.032	-0.979	0.104	-1.373	0.326	-0.726	-0.698	2.246	-0.666	1.747	1.702	-0.022	2.373	-0.55	0.562	0.814	-2.256	0.75	-1.786	-1.731	0.078	-2.385	0.672
0.527	0.665	0.924	0.31	0.183	-1.259	-0.829	-0.935	0.337	0.157	0.284	1.37	0.827	0.958	0.372	0.677	0.686	-1	-0.087	-0.359	-1.378	-0.814	-1.043	-0.361	-0.744	-0.732	1.002	0.405	0.595	2.4	1.47	1.779	0.689	1.228	1.301	-1.708	-0.258	-0.463	-2.463	-1.506	-1.784	-0.637	-1.357	-1.222	1.713
0.658	0.994	0.46	0.211	-0.391	-1.177	-0.928	-0.592	0.698	0.233	0.886	1.016	1.008	0.99	-0.14	0.666	0.128	-1.163	-0.276	-0.87	-1.061	-1.011	-1.018	0.132	-0.761	-0.089	1.17	0.444	1.56	1.748	1.764	1.771	-0.301	1.264	0.247	-2.014	-0.47	-1.498	-1.894	-1.719	-1.843	0.342	-1.142	-0.264	2.166
0.08	1.27	0.241	-0.352	-0.429	-1.145	0.173	-0.82	0.954	0.26	1.059	0.894	-0.125	1.339	-0.433	-0.362	0.244	-1.312	-0.324	-1.05	-0.841	0.013	-1.314	0.444	0.305	-0.227	1.365	0.539	1.89	1.532	-0.075	2.35	-0.799	-0.49	0.396	-2.352	-0.42	-1.864	-1.576	0.049	-2.339	0.718	0.631	-0.482	2.359
0.361	1.186	0.401	-0.73	-0.166	-1.005	0.459	-1.038	0.598	0.791	0.837	0.88	-0.085	1.402	-0.127	-0.729	0.533	-0.987	-0.643	-0.859	-0.904	0.046	-1.378	0.136	0.834	-0.575	0.985	1.249	1.519	1.538	-0.344	2.445	-0.159	-1.381	1.069	-1.743	-1.11	-1.464	-1.697	0.047	-2.459	0.299	1.325	-1.069	1.779
0.179	1.23	-0.406	0.189	-0.965	-0.826	-0.265	-0.241	1.268	-0.005	1.412	0.269	0.358	0.917	-1.03	0.343	-0.46	-1.275	0.036	-1.361	-0.274	-0.208	-0.937	1.084	-0.281	0.488	1.312	-0.143	2.496	0.467	0.57	1.534	-1.875	0.42	-0.83	-2.272	-0.063	-2.377	-0.602	-0.509	-1.662	1.855	-0.518	0.78	2.341
-0.103	1.132	-0.625	0.447	-1.024	-0.587	-0.452	-0.118	1.23	-0.415	1.363	-0.044	0.204	0.785	-1.134	0.57	-0.56	-1.064	0.258	-1.372	-0.047	-0.263	-0.848	1.15	-0.608	0.61	1.181	-0.668	2.353	-0.066	0.529	1.302	-2.049	1.167	-1.001	-1.907	0.518	-2.423	-0.006	-0.221	-1.36	2.082	-1.069	1.151	1.903
0.557	-1.026	-0.532	-0.273	-0.021	1.216	-0.236	1.065	-0.698	0.526	-0.63	-1.132	0.525	-1.305	0.118	0.025	-0.667	1.211	-0.525	0.627	1.077	-0.487	1.275	-0.104	0.05	0.744	-1.205	1.006	-1.145	-1.948	0.866	-2.303	0.281	-0.171	-1.196	2.146	-0.926	1.135	1.99	-0.951	2.195	-0.225	0.061	1.271	-2.209
-0.15	-0.951	0.863	0.22	1.223	0.374	0.021	-0.319	-1.226	-0.166	-1.425	0.279	-0.097	-0.383	1.356	0.164	0.952	1.019	0.257	1.355	-0.321	0.14	0.383	-1.342	-0.082	-0.991	-0.965	-0.526	-2.433	0.425	-0.221	-0.567	2.386	0.287	1.661	1.801	0.388	2.433	-0.464	0.106	0.699	-2.374	-0.249	-1.682	-1.8
-0.673	-0.199	1.103	0.436	1.167	-0.244	0.164	-0.945	-0.871	-0.747	-0.824	0.83	-0.547	0.456	1.238	0.154	1.334	0.386	0.659	0.87	-0.829	0.488	-0.433	-1.279	-0.183	-1.347	-0.375	-1.105	-1.43	1.629	-0.877	0.692	2.219	0.378	2.38	0.546	1.183	1.494	-1.575	0.907	-0.832	-2.124	-0.312	-2.36	-0.666
-0.949	-0.557	0.6	0.028	1.293	-0.119	0.963	-0.681	-0.446	-0.606	-1.128	0.475	-1.18	0.079	0.654	-0.6	1.25	0.206	0.654	1.198	-0.435	1.208	-0.028	-0.613	0.624	-1.241	-0.203	-1.136	-2.031	0.808	-2.089	0.15	1.24	-1.126	2.174	0.473	1.195	2.036	-0.812	2.087	-0.137	-1.274	0.97	-2.321	-0.52
0.307	-0.891	0.878	-1.244	0.324	-0.186	0.921	0.609	-0.678	0.964	-0.735	0.687	-0.39	-0.944	0.97	-1.35	-0.144	0.354	-0.998	0.761	-0.698	0.377	0.948	-0.983	1.361	0.213	-0.297	1.788	-1.26	1.241	-0.689	-1.747	1.688	-2.374	-0.307	0.543	-1.783	1.317	-1.242	0.753	1.659	-1.681	2.342	0.239	-0.584
0.371	-0.565	1.104	-1.25	0.022	-0.326	0.886	0.487	-0.801	1.044	-0.37	0.902	-0.335	-0.72	1.175	-1.328	-0.371	0.263	-1.028	0.408	-0.875	0.311	0.664	-1.185	1.352	0.256	-0.335	1.776	-0.353	1.685	-0.63	-1.246	2.086	-2.406	-0.577	0.422	-1.817	0.701	-1.558	0.63	1.273	-2.019	2.43	0.335	-0.56
0.102	0.568	1.144	-1.019	-0.709	-0.281	0.938	0.151	-0.862	0.732	0.815	0.885	-0.528	0.253	1.272	-1.262	-0.488	0.351	-0.663	-0.842	-0.878	0.536	-0.247	-1.242	1.235	0.533	-0.386	1.202	1.451	1.568	-0.999	0.508	2.27	-2.149	-1.056	0.597	-1.236	-1.42	-1.58	1.044	-0.574	-2.159	2.088	1.068	-0.698
0.055	1.055	0.72	-0.979	-0.828	0.142	0.921	-0.244	-0.834	0.65	1.163	0.362	-0.559	0.831	0.986	-1.195	-0.338	0.591	-0.649	-1.241	-0.307	0.527	-0.809	-0.954	1.22	0.351	-0.613	1.287	1.965	0.809	-0.952	1.525	1.708	-2.156	-0.537	1.037	-1.146	-2.049	-0.747	0.801	-1.508	-1.741	2.172	0.647	-1.131
0.274	0.756	0.952	-1.124	-0.604	-0.036	0.86	-0.118	-0.986	0.852	0.822	0.585	-0.34	0.602	1.204	-1.224	-0.273	0.565	-0.894	-0.862	-0.648	0.369	-0.558	-1.244	1.263	0.351	-0.628	1.479	1.537	1.075	-0.503	1.028	2.194	-2.167	-0.447	1.04	-1.615	-1.628	-0.978	0.65	-1.095	-2.084	2.13	0.523	-1.08
0.111	0.594	1.151	-1.111	-0.597	-0.347	0.97	0.024	-0.823	0.751	0.738	0.959	-0.548	0.388	1.222	-1.312	-0.348	0.273	-0.784	-0.778	-0.945	0.525	-0.425	-1.217	1.297	0.476	-0.338	1.447	1.299	1.589	-0.984	0.632	2.141	-2.332	-0.64	0.614	-1.396	-1.363	-1.585	1.028	-0.706	-2.156	2.309	0.727	-0.558
-0.475	0.61	1.053	-0.834	-0.325	-0.888	1.256	-0.278	-0.163	0.231	0.672	1.185	-1.136	0.482	0.802	-1.331	-0.072	-0.464	-0.255	-0.532	-1.208	1.079	-0.617	-0.726	1.29	0.084	0.418	0.476	1.171	2.079	-1.943	0.829	1.456	-2.302	-0.295	-0.813	-0.331	-0.904	-2.191	1.882	-1.02	-1.333	2.341	0.203	0.796
0.077	0.931	0.912	-0.887	-0.006	-0.943	0.823	-0.935	0.072	0.58	0.57	1.245	-0.447	1.177	0.49	-1.091	0.573	-0.601	-0.577	-0.596	-1.175	0.551	-1.132	-0.531	1.016	-0.615	0.67	1.12	1.081	2.026	-0.717	2.157	0.85	-1.918	1.078	-1.102	-1.102	-0.958	-2.081	0.845	-2.141	-0.984	1.74	-1.195	1.195
-0.223	0.808	0.957	-0.762	0.055	-0.997	1.012	-0.84	0.061	0.381	0.518	1.213	-0.793	1.013	0.593	-1.061	0.635	-0.714	-0.38	-0.52	-1.159	0.738	-1.117	-0.506	1.179	-0.475	0.623	0.581	0.877	2.19	-1.418	1.748	1.002	-1.796	1.008	-1.378	-0.728	-0.947	-2.057	1.162	-2.007	-0.828	2.134	-0.734	1.021
-0.329	0.734	1.059	-0.752	-0.101	-1.055	1.131	-0.608	-0.008	0.281	0.524	1.356	-0.888	0.859	0.654	-1.155	0.341	-0.683	-0.255	-0.526	-1.321	0.914	-0.808	-0.662	1.222	-0.331	0.645	0.385	0.996	2.357	-1.654	1.488	1.035	-2.097	0.542	-1.095	-0.523	-0.951	-2.273	1.691	-1.432	-1.165	2.079	-0.703	1.151
0.359	0.291	1.17	-0.789	0.777	-0.64	0.487	-1.094	-0.577	0.728	-0.327	1.095	-0.043	0.879	1.109	-0.768	1.167	-0.08	-0.714	0.29	-1.131	0.121	-0.859	-1.119	0.813	-1.21	0.017	1.335	-0.514	2.024	-0.222	1.453	1.946	-1.412	2.066	-0.096	-1.299	0.656	-1.996	0.092	-1.486	-1.967	1.371	-2.116	0.198
1.241	0.185	0.348	-0.977	0.733	0.417	-0.308	-1.011	-0.682	1.368	-0.386	-0.05	0.974	0.727	0.724	-0.426	1.047	0.714	-1.428	0.315	0.081	-0.973	-0.762	-0.61	0.382	-1.16	-0.662	2.39	-0.681	-0.199	1.756	1.414	1.151	-0.659	2.019	1.183	-2.474	0.682	0.126	-1.695	-1.305	-1.14	0.784	-1.909	-1.318
1.192	-0.461	0.113	-0.184	1.273	0.095	-1.001	-0.811	-0.242	0.845	-1.083	0.026	1.406	0.222	0.171	0.511	1.324	0.209	-0.861	1.082	-0.03	-1.362	-0.235	-0.213	-0.521	-1.307	-0.243	1.497	-1.953	0.193	2.469	0.31	0.385	0.946	2.283	0.379	-1.52	1.927	-0.051	-2.47	-0.31	-0.356	-0.94	-2.259	-0.468
-0.091	-0.333	1.26	0.982	0.697	-0.447	-0.947	-0.327	-0.8	-0.697	-0.619	1.081	0.514	-0.004	1.297	1.142	0.673	0.227	0.712	0.639	-1.07	-0.579	0.07	-1.273	-1.222	-0.673	-0.232	-1.147	-1.18	1.935	0.998	-0.012	2.265	2.062	1.151	0.356	1.216	1.202	-1.864	-0.929	0.082	-2.304	-2.068	-1.33	-0.42
-1.088	-0.154	0.655	0.659	1.069	0.142	0.415	-0.939	-0.81	-1.099	-0.784	0.322	-0.952	0.492	0.92	0.119	1.276	0.54	1.129	0.727	-0.275	0.957	-0.522	-0.915	-0.186	-1.247	-0.621	-1.936	-1.493	0.596	-1.713	0.996	1.532	0.275	2.281	1.006	1.877	1.455	-0.484	1.715	-0.961	-1.564	-0.186	-2.222	-1.056
0.107	-1.238	-0.259	-1.028	0.476	0.645	0.897	0.806	-0.402	0.703	-1.051	-0.574	-0.496	-1.281	0.088	-1.239	-0.214	0.613	-0.709	1.123	0.593	0.472	1.296	-0.081	1.211	0.229	-0.679	1.152	-1.909	-1.007	-0.859	-2.28	0.114	-2.121	-0.459	1.168	-1.222	1.903	1.106	0.917	2.265	-0.192	2.192	0.377	-1.15
-0.849	-0.635	-0.723	-0.428	0.896	0.846	1.271	-0.201	-0.141	-0.272	-0.952	-0.969	-1.341	-0.235	-0.397	-1.081	0.724	0.595	0.271	0.966	0.998	1.324	0.255	0.395	1.085	-0.615	-0.662	-0.394	-1.775	-1.792	-2.318	-0.475	-0.601	-1.912	1.282	1.072	0.505	1.718	1.802	2.36	0.354	0.695	1.772	-1.245	-1.135
-1.116	-0.198	0.655	0.606	1.139	0.088	0.523	-0.951	-0.688	-1.131	-0.832	0.35	-0.976	0.46	0.898	0.103	1.299	0.538	1.038	0.848	-0.379	1.005	-0.462	-0.836	-0.009	-1.338	-0.442	-1.914	-1.505	0.517	-1.818	0.803	1.521	0.134	2.319	0.918	1.925	1.517	-0.545	1.79	-0.789	-1.528	-0.147	-2.321	-1.013
-1.016	0.769	0.193	1.034	0.466	-0.571	-0.061	-1.25	0.349	-1.336	0.195	0.487	-0.584	1.254	-0.122	0.7	1.083	-0.551	1.241	-0.201	-0.536	0.552	-1.302	0.047	-0.675	-1.064	0.607	-2.321	0.425	0.849	-1.038	2.184	-0.212	1.326	1.877	-0.899	2.259	-0.357	-0.896	1.089	-2.224	0.109	-1.212	-1.87	1.115
-0.637	0.857	-0.716	1.177	0.266	0.463	-0.472	-1.208	0.137	-1.117	0.332	-0.802	-0.073	1.277	-0.57	1.033	0.888	0.163	1.195	-0.4	0.697	0.1	-1.32	0.522	-0.977	-0.979	-0.281	-2	0.66	-1.331	-0.26	2.308	-0.801	1.812	1.607	0.384	2.039	-0.547	1.333	0.068	-2.243	1.042	-1.819	-1.583	-0.355
-0.318	1.197	0.318	1.222	-0.384	0.142	-0.925	-0.813	-0.442	-0.983	0.973	0.132	0.381	1.284	0.46	1.329	0.282	0.354	0.975	-1	-0.079	-0.359	-1.28	-0.489	-1.392	-0.258	-0.336	-1.698	1.719	0.264	0.662	2.296	0.888	2.385	0.426	0.663	1.716	-1.786	-0.28	-0.601	-2.204	-0.872	-2.415	-0.451	-0.706
-0.828	0.933	-0.231	1.249	0.307	0.129	-0.42	-1.236	0.018	-1.304	0.407	-0.173	-0.245	1.354	-0.283	1.028	0.97	0.027	1.333	-0.395	0.216	0.259	-1.364	0.127	-1.065	-0.962	-0.113	-2.352	0.796	-0.248	-0.562	2.32	-0.291	1.76	1.78	0.106	2.383	-0.697	0.333	0.516	-2.45	0.301	-1.75	-1.758	-0.003
-0.788	0.782	-0.669	0.721	0.458	0.967	0.126	-1.206	-0.36	-0.99	0.185	-1.012	-0.493	1.29	-0.264	0.391	1.071	0.813	0.98	-0.196	1.004	0.599	-1.246	0.149	-0.347	-1.022	-0.836	-1.73	0.31	-1.781	-0.953	2.326	-0.286	0.571	1.824	1.606	1.713	-0.421	1.713	0.957	-2.277	0.311	-0.699	-1.845	-1.417
-0.847	0.996	0.08	1.059	-0.008	0.733	-0.201	-0.943	-0.815	-1.214	0.626	-0.413	-0.392	1.26	0.572	0.795	0.576	0.979	1.207	-0.587	0.402	0.405	-1.179	-0.569	-0.775	-0.587	-0.974	-2.128	1.033	-0.782	-0.619	2.229	0.961	1.343	0.941	1.769	2.165	-1.004	0.712	0.644	-2.152	-0.988	-1.433	-1.155	-1.669
-0.993	0.821	0.07	1.167	0.415	-0.402	-0.178	-1.215	0.329	-1.387	0.245	0.22	-0.488	1.306	-0.092	0.888	1.042	-0.445	1.316	-0.254	-0.315	0.5	-1.281	0.145	-0.838	-1.008	0.479	-2.419	0.454	0.482	-0.872	2.275	-0.209	1.501	1.825	-0.803	2.368	-0.5	-0.527	0.915	-2.267	0.357	-1.483	-1.837	0.705
-0.752	0.981	-0.17	1.285	0.097	-0.119	-0.507	-1.116	0.346	-1.269	0.512	-0.097	-0.148	1.331	-0.218	1.133	0.773	-0.229	1.303	-0.598	0.013	0.149	-1.348	0.28	-1.108	-0.76	0.389	-2.273	1.006	-0.139	-0.282	2.378	-0.484	1.944	1.49	-0.393	2.234	-1.077	-0.1	0.36	-2.398	0.429	-2.045	-1.309	0.551
-0.608	1.095	0.236	1.219	0.027	-0.46	-0.559	-1.134	0.246	-1.119	0.679	0.43	-0.016	1.386	0.032	1.105	0.72	-0.429	1.192	-0.68	-0.452	0.05	-1.41	-0.002	-1.091	-0.724	0.473	-2.028	1.224	0.68	-0.164	2.443	-0.094	1.964	1.353	-0.653	2.14	-1.131	-0.734	-0.149	-2.46	-0.107	-1.886	-1.401	0.857
-0.414	1.135	-0.309	0.829	-0.608	-0.76	-0.437	-0.557	1.078	-0.776	1.106	0.292	0.001	1.03	-0.863	0.807	-0.02	-1.143	0.756	-1.133	-0.291	-0.044	-1.103	0.865	-0.798	0.049	1.161	-1.388	2.002	0.414	-0.079	1.863	-1.587	1.349	0.032	-2.024	1.436	-2	-0.516	0.114	-1.931	1.644	-1.377	0.103	2.048
-0.212	1.296	0.003	1.074	-0.457	-0.557	-0.895	-0.792	0.5	-0.832	1.101	0.282	0.429	1.358	-0.283	1.201	0.231	-0.66	0.822	-1.089	-0.391	-0.411	-1.28	0.356	-1.288	-0.209	0.57	-1.523	1.901	0.688	0.852	2.278	-0.593	2.188	0.34	-1.138	1.444	-1.914	-0.723	-0.739	-2.293	0.625	-2.142	-0.424	1.267
0.033	1.238	-0.389	1.101	-0.719	0.005	-1.118	-0.524	0.428	-0.64	1.242	-0.251	0.699	1.103	-0.461	1.39	-0.123	-0.301	0.696	-1.233	0.315	-0.702	-1.103	0.588	-1.406	0.101	0.218	-1.136	2.124	-0.567	1.298	1.923	-0.98	2.382	-0.282	-0.678	1.193	-2.143	0.654	-1.336	-1.832	1.067	-2.439	0.222	0.396
0.035	1.247	-0.289	0.428	-0.841	-0.843	-0.448	-0.387	1.115	-0.277	1.321	0.322	0.343	1.036	-0.871	0.533	-0.255	-1.271	0.27	-1.334	-0.325	-0.286	-1.018	0.886	-0.547	0.293	1.219	-0.356	2.356	0.696	0.481	1.754	-1.611	1.005	-0.466	-2.208	0.476	-2.326	-0.543	-0.681	-1.827	1.502	-0.961	0.464	2.203
-0.633	1.026	-0.548	1.075	-0.463	-0.532	-0.474	-0.572	1.049	-1.121	0.868	-0.021	-0.094	1.058	-1.034	1.003	0.084	-0.989	1.039	-0.95	0.001	0.049	-1.019	0.976	-0.954	-0.064	0.993	-1.828	1.64	0.082	-0.056	1.917	-1.668	1.648	0.024	-1.853	1.773	-1.68	-0.104	0.134	-1.68	1.813	-1.594	-0.199	1.802
-0.629	0.941	-0.588	1.312	-0.008	0.078	-0.688	-0.891	0.594	-1.203	0.615	-0.316	0.016	1.155	-0.788	1.266	0.569	-0.311	1.217	-0.57	0.492	-0.048	-1.146	0.705	-1.259	-0.522	0.417	-2.065	1.109	-0.702	-0.033	2.109	-1.341	2.185	0.994	-0.687	2.118	-1.179	0.558	-0.043	-2.068	1.356	-2.151	-1.066	0.619
-0.133	0.925	-0.869	1.145	-0.195	0.563	-1.029	-0.72	0.348	-0.831	0.747	-0.797	0.579	1.001	-0.84	1.35	0.306	0.106	0.81	-0.683	0.959	-0.608	-0.997	0.814	-1.34	-0.351	-0.144	-1.497	1.361	-1.419	1.067	1.698	-1.53	2.423	0.507	0.039	1.414	-1.055	1.819	-1.019	-1.845	1.341	-2.348	-0.689	-0.348
0.601	1.068	0.302	0.484	-0.818	-0.871	-1.072	-0.269	0.6	0.097	1.172	0.733	1.025	0.842	-0.153	1.008	-0.363	-0.922	-0.078	-1.189	-0.714	-1.059	-0.844	0.182	-0.963	0.341	0.946	0.207	2.15	1.209	1.953	1.456	-0.325	1.66	-0.571	-1.743	-0.253	-2.051	-1.275	-1.876	-1.473	0.34	-1.722	0.531	1.721
0.734	0.813	-0.687	-0.422	-1.099	-0.531	-0.211	0.269	1.217	0.784	1.192	-0.089	0.624	0.335	-1.203	-0.152	-0.851	-1.117	-0.639	-1.216	0.106	-0.549	-0.345	1.215	0.171	0.844	1.086	1.174	2.231	-0.136	1.002	0.571	-2.202	-0.282	-1.584	-1.944	-1.184	-2.162	0.273	-1.045	-0.563	2.155	0.096	1.547	1.857
0.03	0.78	-1.076	0.109	-1.261	-0.184	-0.112	0.492	1.179	-0.018	1.277	-0.616	0.069	0.191	-1.435	0.113	-1.113	-0.872	0.101	-1.263	0.518	-0.074	-0.162	1.381	-0.129	1.098	0.833	-0.026	2.332	-0.909	0.187	0.326	-2.446	0.157	-1.997	-1.458	0.108	-2.252	0.938	-0.331	-0.332	2.449	-0.158	1.895	1.618
-0.213	1.267	-0.142	0.258	-0.714	-1.029	-0.018	-0.515	1.164	-0.326	1.264	0.554	-0.058	1.134	-0.821	0.233	-0.102	-1.337	0.248	-1.238	-0.61	0.097	-1.107	0.78	-0.129	0.139	1.416	-0.677	2.178	0.951	-0.236	1.972	-1.433	0.412	-0.254	-2.434	0.523	-2.209	-0.952	0.332	-1.969	1.433	-0.42	0.192	2.453
-1.084	0.368	0.497	0.631	0.745	-0.819	0.49	-1.164	0.298	-1.046	-0.26	0.819	-0.989	0.958	0.126	0.047	1.133	-0.702	1.152	0.258	-0.838	1.032	-0.953	-0.143	-0.106	-1.257	0.682	-1.959	-0.467	1.423	-1.783	1.657	0.165	0.12	2.074	-1.273	1.898	0.6	-1.529	1.873	-1.656	-0.059	-0.239	-2.088	1.331
-1.211	0.273	0.158	0.762	0.876	-0.5	0.472	-1.163	0.307	-1.217	-0.386	0.375	-1.06	0.896	-0.094	0.163	1.266	-0.491	1.274	0.38	-0.454	1.09	-0.897	0.133	-0.196	-1.293	0.449	-2.222	-0.601	0.809	-1.926	1.561	-0.065	0.265	2.232	-0.875	2.278	0.793	-0.767	1.867	-1.646	0.084	-0.317	-2.304	0.897
-1.245	-0.215	-0.31	0.455	1.169	0.28	0.817	-0.997	0.015	-1.09	-0.863	-0.421	-1.266	0.45	-0.167	-0.221	1.365	0.179	1.089	0.832	0.365	1.304	-0.527	0.183	0.247	-1.358	-0.176	-1.888	-1.52	-0.738	-2.212	0.894	-0.269	-0.502	2.481	0.202	1.912	1.536	0.533	2.242	-0.907	0.521	0.383	-2.384	-0.214
-1.072	-0.36	-0.608	0.02	1.119	0.628	1.058	-0.77	-0.017	-0.7	-0.938	-0.768	-1.323	0.262	-0.378	-0.637	1.222	0.395	0.68	0.893	0.778	1.341	-0.28	0.386	0.656	-1.186	-0.405	-1.244	-1.652	-1.365	-2.324	0.401	-0.683	-1.092	2.095	0.747	1.108	1.614	1.498	2.437	-0.34	0.57	1.099	-2.093	-0.775
-1.115	-0.141	-0.617	0.289	1.117	0.517	0.82	-0.97	0.079	-0.89	-0.788	-0.744	-1.216	0.522	-0.423	-0.342	1.322	0.232	0.879	0.779	0.747	1.224	-0.554	0.457	0.329	-1.268	-0.321	-1.538	-1.483	-1.322	-2.173	1.002	-0.705	-0.497	2.396	0.374	1.554	1.425	1.299	2.098	-1.059	0.952	0.571	-2.294	-0.546
-0.792	-0.675	-0.776	-0.48	0.701	0.971	1.23	0.009	-0.313	-0.22	-0.887	-1.121	-1.278	-0.369	-0.359	-1.103	0.406	0.792	0.179	0.914	1.025	1.26	0.476	0.19	1.062	-0.458	-0.806	-0.352	-1.598	-1.953	-2.258	-0.876	-0.457	-1.799	0.783	1.574	0.412	1.6	1.859	2.176	0.837	0.577	1.922	-0.827	-1.32
-0.671	-0.725	0.833	0.093	1.283	0.215	0.471	-0.506	-1.041	-0.436	-1.234	0.414	-0.846	-0.13	1.159	-0.386	1.139	0.764	0.545	1.29	-0.356	0.69	0.142	-1.153	0.181	-1.084	-0.812	-0.678	-2.242	0.682	-1.37	-0.236	2.092	-0.507	1.973	1.395	1.017	2.213	-0.709	1.36	0.124	-2.072	0.43	-1.955	-1.406
-1.091	-0.662	-0.048	0.12	1.071	0.755	0.994	-0.38	-0.689	-0.756	-1.031	-0.523	-1.301	-0.205	0.428	-0.583	0.936	0.894	0.817	1.088	0.533	1.307	0.177	-0.404	0.569	-0.897	-0.887	-1.326	-1.92	-0.794	-2.335	-0.461	0.674	-1.137	1.602	1.551	1.431	1.941	0.934	2.346	0.312	-0.727	0.968	-1.543	-1.679
-0.979	0.199	0.817	1.205	0.209	0.383	-0.216	-0.431	-1.211	-1.368	-0.014	0.286	-0.478	0.399	1.253	0.873	0.416	0.989	1.405	-0.023	-0.271	0.49	-0.311	-1.321	-0.899	-0.52	-0.964	-2.455	0.004	0.529	-0.833	0.562	2.223	1.526	0.724	1.74	2.45	-0.008	-0.4	0.903	-0.497	-2.288	-1.615	-0.733	-1.777
-0.309	0.235	1.202	1.163	-0.445	-0.278	-0.828	0.264	-0.929	-0.929	0.455	0.921	0.353	-0.005	1.34	1.264	-0.391	0.411	0.933	-0.435	-0.935	-0.3	0.042	-1.342	-1.26	0.463	-0.406	-1.689	0.683	1.65	0.559	0.029	2.455	2.194	-0.828	0.647	1.676	-0.826	-1.581	-0.547	0.049	-2.416	-2.253	0.765	-0.744
-0.172	0.109	1.3	1.138	0.283	-0.534	-0.945	-0.472	-0.74	-0.829	-0.103	1.138	0.508	0.292	1.321	1.291	0.463	0.169	0.861	0.061	-1.172	-0.465	-0.435	-1.276	-1.315	-0.467	-0.117	-1.466	-0.098	2.073	0.839	0.666	2.21	2.288	0.825	0.205	1.48	0.234	-2.045	-0.825	-0.704	-2.228	-2.367	-0.735	-0.277
0.336	0.018	1.209	0.905	-0.183	-0.898	-1.269	0.161	-0.294	-0.348	0.166	1.309	0.969	-0.124	0.969	1.384	-0.249	-0.358	0.331	-0.108	-1.338	-1.031	0.059	-0.948	-1.371	0.247	0.406	-0.488	0.277	2.336	1.763	-0.295	1.738	2.379	-0.358	-0.574	0.57	-0.116	-2.409	-1.767	0.046	-1.805	-2.39	0.456	0.675
0.081	0.797	1.034	0.819	-0.905	-0.17	-0.966	0.165	-0.835	-0.493	1.127	0.741	0.632	0.387	1.224	1.072	-0.683	0.416	0.462	-1.012	-0.737	-0.677	-0.355	-1.179	-1.152	0.673	-0.396	-0.78	2.028	1.189	1.229	0.535	2.1	1.974	-1.287	0.766	0.899	-1.893	-1.337	-1.12	-0.733	-2.05	-2.045	1.213	-0.737
-0.566	0.231	1.147	1.245	-0.358	-0.066	-0.718	0.098	-1.07	-1.146	0.384	0.779	0.071	0.053	1.382	1.24	-0.287	0.625	1.11	-0.396	-0.745	-0.113	-0.088	-1.368	-1.256	0.267	-0.647	-1.968	0.701	1.393	0.154	0.075	2.485	2.15	-0.467	1.081	2.005	-0.632	-1.35	-0.133	-0.102	-2.435	-2.115	0.493	-1.201
0.718	-0.612	0.867	0.543	0.818	-0.805	-1.246	-0.277	-0.122	0.101	-0.925	1.033	1.249	-0.236	0.592	1.132	0.699	-0.429	-0.099	0.837	-1.098	-1.215	0.171	-0.662	-1.132	-0.713	0.422	0.279	-1.714	1.827	2.171	-0.242	1.2	1.996	1.307	-0.786	-0.274	1.519	-1.811	-2.196	0.489	-1.078	-2.012	-1.192	0.791
0.734	1.029	-0.23	-1.228	-0.013	-0.392	0.501	-1.029	0.576	1.228	0.627	0.073	0.156	1.319	-0.507	-1.083	0.658	-0.629	-1.232	-0.688	-0.119	-0.129	-1.321	0.484	1.079	-0.628	0.591	2.175	1.072	0.166	0.306	2.298	-0.921	-1.915	1.21	-1.023	-2.214	-1.195	-0.195	-0.199	-2.299	0.866	1.828	-1.055	1.214
-0.986	0.525	-0.633	-0.245	-0.769	0.98	1.23	0.256	-0.352	-0.47	0.829	-1.008	-1.391	0.168	-0.187	-0.914	-0.633	0.817	0.451	-0.816	1.023	1.403	-0.166	0.181	0.918	0.647	-0.84	-0.856	1.406	-1.841	-2.439	0.278	-0.271	-1.603	-1.129	1.503	0.791	-1.465	1.874	2.499	-0.234	0.313	1.61	1.117	-1.563
-1.164	0.28	-0.438	0.168	-0.581	1.166	1.022	0.318	-0.688	-0.815	0.583	-0.95	-1.376	-0.051	0.122	-0.55	-0.564	1.17	0.873	-0.523	1.05	1.366	-0.011	-0.148	0.564	0.607	-1.149	-1.494	0.955	-1.715	-2.455	-0.057	0.254	-1.089	-1.122	1.882	1.575	-0.921	1.786	2.449	-0.066	-0.307	0.953	1.169	-1.996
-0.877	0.185	0.967	1.223	-0.344	0.243	-0.332	0.27	-1.212	-1.316	0.376	0.465	-0.347	-0.003	1.359	0.992	-0.271	0.91	1.317	-0.365	-0.453	0.338	0.071	-1.39	-0.953	0.454	-0.897	-2.279	0.416	0.833	-0.573	-0.093	2.419	1.754	-0.627	1.586	2.315	-0.681	-0.761	0.526	0.032	-2.453	-1.774	0.692	-1.617
-1.15	-0.419	0.35	1.028	-0.417	0.604	0.078	0.905	-0.953	-1.367	-0.011	-0.212	-0.811	-0.777	0.868	0.576	-0.794	1.008	1.359	0.026	0.138	0.759	0.878	-0.792	-0.619	0.842	-1.008	-2.44	-0.069	-0.461	-1.309	-1.358	1.669	1.089	-1.518	1.662	2.401	-0.1	0.29	1.403	1.334	-1.503	-1.04	1.547	-1.659
-1.255	-0.24	0.162	0.9	-0.886	0.25	0.356	1.097	-0.505	-1.333	0.402	-0.057	-1.038	-0.859	0.345	0.324	-1.317	0.397	1.38	-0.36	0.054	0.983	0.827	-0.472	-0.315	1.239	-0.487	-2.325	0.741	0.005	-1.832	-1.5	0.752	0.536	-2.28	0.78	2.394	-0.609	0.295	1.814	1.528	-0.716	-0.589	2.188	-0.898
-1.096	-0.661	0.122	1.124	-0.626	0.13	-0.006	1.286	-0.256	-1.4	-0.037	-0.014	-0.663	-1.217	0.257	0.712	-1.209	0.216	1.41	0.026	0.025	0.711	1.237	-0.258	-0.717	1.196	-0.233	-2.492	-0.048	-0.099	-1.237	-2.089	0.35	1.243	-2.087	0.405	2.512	0.004	0.095	1.245	2.132	-0.421	-1.324	2.091	-0.322
-1.03	-0.625	-0.523	1.018	-0.676	0.443	-0.008	1.298	0.121	-1.329	0.033	-0.569	-0.615	-1.219	-0.417	0.601	-1.26	0.237	1.312	-0.023	0.61	0.634	1.213	0.387	-0.652	1.25	-0.149	-2.312	0.113	-1.035	-1.135	-2.132	-0.707	1.191	-2.187	0.361	2.31	0.028	0.979	1.224	2.094	0.534	-1.23	2.091	-0.23
-0.497	-1.018	-0.577	0.809	-0.116	0.967	-0.344	1.175	-0.373	-0.883	-0.538	-0.947	-0.062	-1.37	-0.142	0.733	-0.805	0.835	0.793	0.591	0.99	0.059	1.406	0.152	-0.715	0.813	-0.846	-1.479	-1.082	-1.698	-0.102	-2.486	-0.231	1.34	-1.477	1.449	1.386	1.033	1.788	0.22	2.483	0.142	-1.29	1.432	-1.492
0.253	-1.042	0.69	0.806	0.977	0.014	-1.087	0.098	-0.674	-0.36	-1.303	0.405	0.841	-0.668	0.886	1.158	0.6	0.475	0.354	1.253	-0.437	-0.872	0.736	-0.86	-1.185	-0.539	-0.397	-0.62	-2.267	0.854	1.432	-1.16	1.59	2.088	1.02	0.83	0.721	2.133	-0.921	-1.453	1.25	-1.63	-2.103	-1.054	-0.796
-0.34	-1.246	0.165	1.02	0.521	0.639	-0.654	0.691	-0.821	-0.896	-1.129	-0.248	0.259	-1.228	0.558	1.08	-0.129	0.916	0.845	1.109	0.297	-0.222	1.239	-0.622	-1.004	0.057	-0.941	-1.584	-1.925	-0.524	0.388	-2.188	1.095	1.973	-0.169	1.555	1.443	1.956	0.501	-0.418	2.21	-1.045	-1.866	0.198	-1.542
-0.703	-0.966	0.368	1.275	-0.183	-0.197	-0.547	1.147	-0.196	-1.229	-0.5	0.308	-0.089	-1.32	0.38	1.157	-0.852	0.044	1.253	0.503	-0.414	0.132	1.367	-0.312	-1.167	0.796	-0.066	-2.229	-0.92	0.552	-0.228	-2.354	0.751	2.042	-1.527	0.091	2.158	0.957	-0.771	0.233	2.415	-0.604	-2.034	1.435	0.041
-0.415	-1.091	-0.58	1.028	-0.025	0.806	-0.561	1.091	-0.229	-0.915	-0.682	-0.839	0.13	-1.384	-0.248	0.982	-0.726	0.701	0.972	0.676	0.817	-0.063	1.356	0.198	-0.981	0.7	-0.634	-1.534	-1.143	-1.61	0.181	-2.414	-0.413	1.679	-1.262	1.19	1.593	1.2	1.559	-0.199	2.412	0.357	-1.845	1.266	-1.078
-1.07	-0.095	-0.761	1.139	-0.349	-0.472	-0.089	0.455	1.155	-1.405	0.194	-0.2	-0.618	-0.372	-1.26	0.774	-0.551	-1.014	1.381	-0.091	0.118	0.618	0.356	1.162	-0.798	0.49	1.008	-2.44	0.392	-0.196	-1.095	-0.732	-2.058	1.315	-1.21	-1.761	2.441	-0.149	0.234	1.174	0.672	2.116	-1.347	1.003	1.852
-0.673	-0.005	-1.089	1.278	-0.073	-0.044	-0.619	0.038	1.159	-1.232	0.004	-0.633	-0.045	-0.01	-1.415	1.182	-0.038	-0.745	1.232	-0.124	0.662	0.035	-0.06	1.403	-1.204	0.131	0.79	-2.136	0.028	-1.213	-0.024	-0.08	-2.5	2.064	0.129	-1.327	2.192	-0.108	1.166	0.066	-0.131	2.483	-2.129	0.258	1.329
-1.089	0.681	-0.044	0.511	-0.443	-1.103	0.549	-0.283	1.112	-1.065	0.613	0.659	-0.997	0.665	-0.755	-0.033	-0.106	-1.427	0.987	-0.745	-0.652	1.037	-0.579	0.723	0.002	0.045	1.372	-1.784	1.173	1.268	-1.781	1.186	-1.238	0.08	-0.139	-2.526	1.755	-1.154	-1.188	1.819	-1	1.31	-0.021	0.041	2.454
-0.73	0.455	-0.919	1.055	-0.703	-0.297	-0.299	0.211	1.224	-1.092	0.754	-0.415	-0.28	0.094	-1.321	0.821	-0.696	-0.971	1.178	-0.632	0.411	0.328	-0.115	1.368	-0.893	0.508	0.946	-1.907	1.344	-0.719	-0.585	0.301	-2.33	1.376	-1.148	-1.752	2.05	-1.185	0.752	0.603	-0.188	2.421	-1.599	0.963	1.609
-0.46	1.017	-0.617	0.746	-0.79	-0.612	-0.385	-0.248	1.192	-0.785	1.16	0.006	-0.095	0.75	-1.172	0.743	-0.309	-1.113	0.642	-1.187	-0.057	-0.054	-0.862	1.12	-0.685	0.4	1.125	-1.328	2.108	0.023	-0.079	1.401	-2.075	1.497	-0.475	-1.903	1.271	-2.101	0.025	0.041	-1.547	1.953	-1.167	0.663	2.067
-0.043	0.739	-1.021	1.034	-0.696	0.217	-1.006	-0.053	0.776	-0.686	0.903	-0.791	0.61	0.489	-1.13	1.247	-0.452	-0.393	0.701	-0.864	0.792	-0.571	-0.409	1.209	-1.339	0.31	0.247	-1.214	1.643	-1.447	1.015	0.878	-2.034	2.219	-0.776	-0.633	1.26	-1.534	1.475	-0.958	-0.809	2.127	-2.284	0.621	0.578
-1.258	-0.117	-0.258	0.876	-0.457	-0.804	0.349	0.692	1.035	-1.384	0.255	0.342	-0.993	-0.457	-0.834	0.327	-0.594	-1.207	1.319	-0.257	-0.316	0.996	0.467	0.832	-0.344	0.867	1.117	-2.384	0.326	0.616	-1.802	-0.938	-1.426	0.662	-1.199	-2.077	2.352	-0.459	-0.558	1.807	0.678	1.451	-0.557	1.312	2.059
-0.171	-1.008	-0.786	1.176	0.295	0.397	-1.033	0.732	0.329	-0.859	-0.796	-0.786	0.528	-1.106	-0.703	1.349	-0.284	0.035	0.869	0.854	0.695	-0.537	1.138	0.648	-1.417	0.24	-0.03	-1.487	-1.417	-1.37	1.021	-1.963	-1.193	2.415	-0.544	0.161	1.511	1.385	1.403	-0.933	1.978	1.206	-2.46	0.516	-0.066
-0.621	-0.882	-0.694	1.273	0.033	-0.044	-0.66	0.815	0.766	-1.196	-0.598	-0.372	0.021	-1.065	-0.936	1.193	-0.436	-0.557	1.209	0.491	0.468	-0.031	1.058	0.968	-1.213	0.469	0.496	-2.105	-1.068	-0.751	0.07	-1.899	-1.59	2.175	-0.849	-0.743	2.096	1.04	0.662	-0.04	2.001	1.476	-2.179	0.854	0.879
-1.05	-0.677	-0.313	1.117	-0.202	-0.592	-0.054	0.862	0.923	-1.376	-0.278	0.194	-0.602	-1.015	-0.768	0.757	-0.694	-0.941	1.356	0.317	-0.187	0.594	1.008	0.767	-0.695	0.622	0.978	-2.43	-0.462	0.256	-1.116	-1.618	-1.512	1.302	-1.3	-1.677	2.389	0.573	-0.162	1.11	1.769	1.336	-1.289	1.077	1.716
-0.38	-0.979	0.739	0.811	-0.188	-0.992	-0.429	1.173	0.241	-0.761	-0.522	1.08	0.048	-1.322	0.317	0.786	-0.847	-0.764	0.741	0.494	-1.119	-0.019	1.374	-0.297	-0.788	0.838	0.754	-1.322	-0.923	1.899	0.012	-2.373	0.541	1.392	-1.556	-1.3	1.377	0.907	-1.901	-0.092	2.394	-0.547	-1.374	1.536	1.338
-0.677	-0.442	0.983	0.684	-0.826	-0.731	0.092	1.286	-0.182	-0.829	0.247	1.139	-0.441	-1.07	0.724	0.388	-1.334	-0.328	0.929	-0.226	-1.031	0.487	1.098	-0.743	-0.301	1.327	0.405	-1.515	0.347	1.958	-0.852	-1.957	1.226	0.532	-2.343	-0.764	1.446	-0.397	-1.92	0.808	1.944	-1.338	-0.652	2.363	0.671
-1.062	-0.515	0.509	0.596	-0.616	-0.94	0.466	1.118	0.471	-1.042	0.055	0.92	-0.959	-1.031	0.043	0.069	-1.069	-0.905	1.054	-0.096	-0.863	0.973	0.999	0.022	-0.095	1.11	0.88	-1.954	0.154	1.508	-1.647	-1.828	0.165	0.127	-1.823	-1.66	1.883	-0.215	-1.546	1.687	1.796	-0.083	-0.098	1.949	1.52
0.439	0.07	1.214	-0.064	-1.139	-0.59	-0.398	1.06	-0.588	0.27	0.753	1.165	0.553	-0.629	1.13	0.282	-1.36	0.015	-0.409	-0.785	-1.122	-0.537	0.627	-1.133	-0.21	1.375	0.032	0.53	1.371	2.02	1.016	-1.027	1.994	0.416	-2.448	0.029	-0.544	-1.405	-2.058	-0.95	1.056	-2	-0.415	2.472	-0.072
0.923	0.855	-0.316	0.24	-0.855	0.959	-1.12	-0.055	-0.687	0.445	1.061	-0.792	1.298	0.54	0.194	0.885	-0.496	1.024	-0.426	-1.126	0.774	-1.26	-0.616	-0.281	-0.842	0.506	-1.024	0.751	1.943	-1.327	2.312	1.06	0.281	1.457	-0.874	1.874	-0.741	-1.885	1.477	-2.261	-0.97	-0.415	-1.618	0.858	-1.785
0.474	0.714	-0.942	0.735	-0.302	1.013	-1.185	-0.443	-0.092	-0.122	0.574	-1.265	1.017	0.762	-0.515	1.225	0.107	0.641	0.168	-0.677	1.271	-1.038	-0.726	0.513	-1.193	-0.115	-0.697	-0.26	1.055	-2.243	1.831	1.466	-0.885	2.126	0.28	1.187	0.268	-1.301	2.186	-1.966	-1.147	0.947	-2.057	-0.279	-1.141
0.233	0.684	-1.042	0.65	0.219	1.091	-0.917	-0.866	-0.025	-0.254	0.296	-1.328	0.7	0.995	-0.634	1.001	0.709	0.713	0.219	-0.287	1.342	-0.765	-0.969	0.664	-0.982	-0.657	-0.702	-0.475	0.496	-2.357	1.174	1.782	-1.185	1.772	1.18	1.314	0.474	-0.547	2.364	-1.224	-1.844	1.139	-1.639	-1.155	-1.332
-0.229	0.88	-0.911	0.291	0.372	1.211	0.008	-1.232	-0.305	-0.333	0.319	-1.319	-0.1	1.343	-0.398	0.212	1.017	0.986	0.341	-0.308	1.3	0.213	-1.322	0.356	-0.169	-0.999	-0.937	-0.599	0.583	-2.336	-0.145	2.35	-0.739	0.463	1.762	1.714	0.453	-0.588	2.324	0.168	-2.346	0.651	-0.505	-1.811	-1.602
-0.265	0.808	-0.951	-0.17	0.334	1.222	0.391	-1.18	-0.264	-0.072	0.258	-1.357	-0.422	1.263	-0.437	-0.388	0.945	0.937	0.051	-0.322	1.374	0.428	-1.235	0.426	0.295	-0.997	-0.925	-0.181	0.487	-2.435	-0.792	2.28	-0.746	-0.554	1.743	1.624	0.165	-0.542	2.415	0.958	-2.109	0.73	0.51	-1.769	-1.605
-0.684	0.61	-0.885	0.647	0.668	0.852	0.002	-1.279	0.052	-0.856	-0.045	-1.032	-0.443	1.202	-0.633	0.426	1.238	0.487	0.797	0.018	1.116	0.43	-1.199	0.565	-0.439	-1.215	-0.458	-1.556	-0.132	-1.839	-0.65	2.101	-1.174	0.699	2.234	0.904	1.454	0.065	2	0.884	-2.073	0.864	-0.746	-2.192	-0.8
-0.826	0.721	-0.662	0.548	0.464	1.096	0.244	-1.191	-0.361	-0.914	0.149	-1.054	-0.656	1.207	-0.179	0.184	1.051	0.931	0.847	-0.173	1.154	0.719	-1.199	0.183	-0.262	-1.048	-0.862	-1.559	0.352	-1.918	-1.07	2.122	-0.469	0.309	1.949	1.468	1.561	-0.421	1.988	1.228	-2.123	0.323	-0.387	-1.866	-1.565
-0.909	0.906	-0.12	1.024	0.254	0.626	-0.194	-1.209	-0.45	-1.247	0.441	-0.501	-0.485	1.262	0.278	0.746	0.878	0.703	1.174	-0.409	0.49	0.441	-1.33	-0.199	-0.817	-0.957	-0.638	-2.154	0.793	-0.962	-0.679	2.322	0.522	1.384	1.548	1.216	2.177	-0.583	0.73	0.802	-2.328	-0.386	-1.343	-1.636	-1.252
0.307	0.973	0.761	0.363	-1.164	0.31	-0.62	0.229	-1.091	0.022	1.356	0.246	0.554	0.482	1.204	0.691	-0.857	0.86	0.001	-1.33	-0.286	-0.548	-0.467	-1.158	-0.602	0.907	-0.915	-0.043	2.4	0.353	1.111	0.834	2.012	1.239	-1.578	1.529	-0.101	-2.426	-0.362	-1.198	-0.915	-1.942	-1.126	1.594	-1.542
0.936	0.459	0.685	0.147	-1.12	-0.619	-1.075	0.689	-0.142	0.511	1.009	0.791	1.252	-0.133	0.476	0.808	-1.095	-0.313	-0.523	-1.01	-0.873	-1.257	0.133	-0.55	-0.774	1.161	0.287	0.946	1.728	1.591	2.209	-0.314	0.996	1.3	-1.982	-0.538	-0.903	-1.873	-1.322	-2.169	0.363	-1.001	-1.4	2.013	0.456
0.068	0.463	1.213	0.69	-1.032	-0.342	-0.767	0.516	-0.903	-0.406	0.939	0.975	0.54	-0.076	1.323	0.856	-1.033	0.375	0.434	-0.918	-1.024	-0.532	0.004	-1.325	-0.914	0.957	-0.398	-0.648	1.723	1.625	0.795	-0.05	2.316	1.511	-1.818	0.666	0.932	-1.594	-1.753	-0.899	0.091	-2.263	-1.67	1.775	-0.515
-0.21	-0.265	1.226	0.925	0.836	-0.321	-0.642	-0.639	-0.923	-0.663	-0.764	0.956	0.28	0.253	1.356	0.986	0.928	0.375	0.771	0.633	-0.986	-0.236	-0.274	-1.363	-0.968	-0.939	-0.379	-1.251	-1.262	1.715	0.384	0.495	2.405	1.616	1.742	0.701	1.326	1.24	-1.696	-0.431	-0.474	-2.455	-1.816	-1.58	-0.629
-0.886	-0.193	0.89	1.021	0.693	0.294	-0.104	-0.548	-1.164	-1.21	-0.555	0.384	-0.453	0.182	1.307	0.746	0.781	0.918	1.174	0.532	-0.37	0.548	-0.325	-1.282	-0.734	-0.729	-0.909	-2.138	-0.953	0.624	-0.94	0.409	2.216	1.272	1.373	1.64	2.213	0.876	-0.567	0.892	-0.413	-2.263	-1.371	-1.177	-1.699
0.688	0.452	0.998	0.487	0.005	-1.204	-1.157	-0.48	0.228	0.203	0.199	1.417	1.083	0.663	0.479	1.075	0.286	-0.903	-0.144	-0.291	-1.372	-1.178	-0.552	-0.486	-0.994	-0.358	0.917	0.475	0.237	2.471	1.984	1.176	0.722	1.858	0.538	-1.574	-0.368	-0.355	-2.418	-2.141	-1.036	-0.8	-1.852	-0.506	1.548
0.733	0.064	1.027	0.582	-0.077	-1.141	-1.251	0.003	0.088	0.108	0.091	1.374	1.283	0.033	0.554	1.184	-0.1	-0.781	-0.076	-0.043	-1.373	-1.221	-0.095	-0.626	-1.127	0.089	0.79	0.067	0.222	2.492	2.29	-0.058	1.054	2.005	-0.169	-1.378	-0.179	-0.101	-2.43	-2.228	-0.081	-1.004	-2.105	0.212	1.329
-0.373	0.065	1.245	1.121	0.556	-0.326	-0.676	-0.659	-0.88	-0.932	-0.293	0.959	0.238	0.407	1.398	1.166	0.717	0.37	0.96	0.324	-0.974	-0.169	-0.469	-1.348	-1.094	-0.776	-0.313	-1.69	-0.508	1.667	0.323	0.82	2.4	2.007	1.309	0.557	1.608	0.654	-1.783	-0.374	-0.866	-2.317	-2.042	-1.318	-0.614
-1.085	-0.16	-0.692	-0.061	0.271	1.238	1.138	-0.044	-0.589	-0.649	-0.251	-1.248	-1.405	-0.038	-0.059	-0.742	0.241	1.143	0.626	0.292	1.188	1.396	0.096	0.052	0.757	-0.181	-1.176	-1.062	-0.587	-2.198	-2.481	-0.109	-0.095	-1.333	0.302	2.037	1.146	0.356	2.165	2.473	0.153	0.247	1.273	-0.273	-2.055
-0.218	0.193	-1.249	-0.981	0.058	0.8	1.187	-0.298	0.447	0.447	0.057	-1.29	-0.863	0.298	-1.068	-1.351	0.212	0.25	-0.504	-0.122	1.263	0.884	-0.31	1.068	1.358	-0.246	-0.224	0.791	0.072	-2.278	-1.46	0.665	-1.87	-2.423	0.441	0.395	-0.816	-0.009	2.252	1.491	-0.512	1.901	2.446	-0.547	-0.398
-0.429	1.198	-0.288	-0.849	-0.899	0.377	1.253	-0.289	-0.113	0.255	1.331	-0.406	-1.066	0.933	-0.139	-1.327	-0.407	0.295	-0.277	-1.285	0.424	1.016	-0.931	0.094	1.342	0.384	-0.325	0.473	2.337	-0.713	-1.893	1.633	-0.238	-2.283	-0.708	0.495	-0.521	-2.343	0.676	1.875	-1.637	0.173	2.406	0.692	-0.338
-0.984	0.711	-0.376	-0.117	-0.794	1.01	1.088	-0.004	-0.676	-0.556	0.923	-0.876	-1.313	0.403	0.16	-0.768	-0.548	1.017	0.555	-0.963	0.888	1.313	-0.464	-0.18	0.738	0.442	-1.108	-0.881	1.674	-1.521	-2.262	0.883	0.356	-1.389	-0.783	1.848	0.908	-1.707	1.54	2.302	-0.785	-0.25	1.355	0.925	-1.873
-0.712	-0.168	-1.027	-0.561	0.284	1.13	1.283	-0.183	-0.055	-0.105	-0.347	-1.357	-1.24	0.023	-0.579	-1.173	0.326	0.734	0.124	0.198	1.403	1.276	-0.068	0.656	1.143	-0.289	-0.744	-0.112	-0.477	-2.446	-2.242	0.005	-1.019	-2.114	0.584	1.278	0.122	0.507	2.439	2.301	-0.03	1.031	2.021	-0.432	-1.396
-0.171	0.558	-1.152	-1.012	-0.439	0.673	1.171	-0.075	0.497	0.534	0.715	-1.123	-0.857	0.353	-1.052	-1.381	-0.239	0.092	-0.526	-0.58	1.18	0.834	-0.421	1.014	1.366	0.279	-0.07	0.946	1.119	-1.989	-1.521	0.583	-1.86	-2.487	-0.396	0.187	-0.932	-1.178	2.036	1.617	-0.754	1.649	2.407	0.52	-0.065
1.157	0.066	-0.56	-1.035	0.164	-0.719	-0.123	-0.22	1.274	1.393	-0.039	0.088	0.79	0.174	-1.146	-0.566	0.25	-1.232	-1.385	0.059	-0.129	-0.834	-0.158	1.148	0.599	-0.262	1.258	2.462	-0.188	0.144	1.391	0.295	-2	-0.979	0.521	-2.16	-2.492	0.02	-0.208	-1.467	-0.299	1.968	1.089	-0.374	2.269
0.689	-1.073	-0.002	0	0.78	-1.027	-0.76	0.271	0.989	0.391	-1.179	0.618	0.9	-0.848	-0.629	0.497	0.338	-1.245	-0.502	1.139	-0.701	-0.977	0.842	0.615	-0.477	-0.343	1.248	0.824	-2.008	1.177	1.577	-1.551	-1.086	0.924	0.603	-2.191	-0.859	1.941	-1.157	-1.581	1.572	1.049	-0.717	-0.508	2.302
-0.606	-0.82	0.783	0.158	-0.309	-1.252	0.35	1.16	0.432	-0.544	-0.299	1.265	-0.611	-1.237	0.212	-0.214	-0.911	-1.078	0.497	0.326	-1.284	0.593	1.245	-0.221	0.046	0.951	1.019	-0.957	-0.581	2.219	-0.942	-2.291	0.42	-0.26	-1.596	-1.927	0.962	0.601	-2.264	1.202	2.188	-0.228	0.229	1.606	1.868
-1.213	-0.118	0.455	0.273	-0.299	-1.189	0.923	0.537	0.744	-0.944	0.099	1.096	-1.352	-0.307	-0.225	-0.433	-0.443	-1.218	0.947	-0.105	-1.03	1.34	0.499	0.17	0.403	0.54	1.232	-1.7	0.173	1.794	-2.276	-0.751	-0.418	-0.732	-0.938	-2.139	1.664	-0.258	-1.78	2.34	0.697	0.32	0.744	0.794	2.198
-1.202	-0.362	0.218	0.356	0.2	-1.192	0.88	0.017	0.953	-0.944	-0.415	0.867	-1.317	-0.3	-0.455	-0.27	0.025	-1.366	0.949	0.318	-0.89	1.324	0.195	0.44	0.339	-0.167	1.357	-1.811	-0.485	1.61	-2.283	-0.356	-0.885	-0.572	0.346	-2.338	1.684	0.725	-1.548	2.36	0.339	0.756	0.541	-0.227	2.452
-1.101	-0.305	-0.637	1.037	-0.8	-0.041	0.017	1.046	0.724	-1.347	0.291	-0.345	-0.737	-0.877	-0.847	0.626	-1.155	-0.476	1.323	-0.364	0.405	0.654	0.804	0.89	-0.629	1.161	0.48	-2.321	0.577	-0.673	-1.277	-1.488	-1.594	1.201	-2.031	-0.869	2.36	-0.533	0.637	1.186	1.491	1.531	-1.038	2.123	0.86
-0.891	-0.118	-0.974	0.702	-1.014	0.371	0.171	1.152	0.554	-0.994	0.584	-0.86	-0.7	-0.805	-0.986	0.311	-1.366	-0.103	1.016	-0.546	0.796	0.659	0.818	0.922	-0.337	1.362	0.114	-1.636	1.044	-1.512	-1.198	-1.465	-1.644	0.557	-2.387	-0.131	1.76	-1.021	1.443	1.155	1.403	1.631	-0.594	2.378	0.329
-1.095	-0.306	-0.609	1.14	-0.515	-0.367	-0.028	0.852	0.935	-1.376	0.153	-0.143	-0.685	-0.702	-1.028	0.762	-0.836	-0.849	1.394	-0.145	0.16	0.672	0.733	0.954	-0.725	0.871	0.81	-2.481	-0.044	-0.075	-1.237	-1.306	-1.706	1.329	-1.452	-1.566	2.437	-0.168	0.311	1.194	1.267	1.773	-1.283	1.629	1.358
-0.6	-0.533	-1.01	1.216	-0.315	0.271	-0.627	0.866	0.707	-1.105	-0.063	-0.865	-0.023	-0.927	-1.057	1.154	-0.741	-0.28	1.133	0.133	0.794	-0.058	0.853	1.111	-1.129	0.787	0.224	-2.023	-0.341	-1.331	-0.039	-1.635	-1.848	2.102	-1.148	-0.546	2.043	0.248	1.436	-0.062	1.553	1.898	-1.993	1.28	0.464
0.417	-0.719	-0.992	0.706	0.058	1.077	-1.142	0.569	-0.06	-0.215	-0.545	-1.286	0.993	-0.827	-0.574	1.169	-0.349	0.703	0.169	0.452	1.323	-0.956	0.78	0.573	-1.204	0.272	-0.681	-0.308	-0.943	-2.258	1.816	-1.257	-1.212	2.076	-0.579	1.31	0.212	0.842	2.355	-1.699	1.455	0.935	-2.055	0.7	-1.188
0.699	-0.789	-0.725	-0.151	-0.292	1.259	-0.503	1.055	-0.495	0.542	-0.305	-1.224	0.786	-1.197	-0.137	0.214	-0.876	1.125	-0.488	0.317	1.252	-0.731	1.194	0.146	-0.218	0.804	-1.07	0.886	-0.437	-2.195	1.338	-2.056	-0.321	0.262	-1.503	2.027	-0.906	0.633	2.168	-1.278	2.089	0.287	-0.41	1.337	-2.058
1.265	-0.018	-0.245	-0.558	-0.933	0.654	-0.725	0.958	-0.442	1.121	0.582	-0.555	1.262	-0.621	0.088	0.091	-1.186	0.676	-1.155	-0.571	0.547	-1.245	0.627	-0.133	-0.119	1.186	-0.702	1.991	1.149	-0.95	2.275	-1.141	0.184	0.242	-2.041	1.304	-1.973	-1.122	1.007	-2.247	1.093	-0.156	-0.243	2.043	-1.309
0.59	0.924	-0.587	0.403	-1.229	-0.086	-1.044	0.302	0.728	0.116	1.353	-0.252	0.98	0.391	-0.843	0.913	-0.962	-0.49	-0.158	-1.362	0.339	-1.005	-0.4	0.859	-0.965	0.974	0.518	0.307	2.347	-0.605	1.875	0.747	-1.489	1.616	-1.621	-1.014	-0.21	-2.435	0.584	-1.823	-0.726	1.45	-1.645	1.693	0.943
0.625	0.92	-0.651	0.621	-1.046	0.354	-1.224	0.17	0.367	0.004	1.25	-0.577	1.182	0.502	-0.637	1.195	-0.753	0.041	-0.025	-1.215	0.632	-1.148	-0.444	0.747	-1.154	0.762	-0.038	-0.019	2.073	-1.221	2.05	0.814	-1.115	2.034	-1.382	0.031	0.067	-2.198	1.096	-2.057	-0.699	1.209	-2.128	1.288	-0.168
0.458	1.104	-0.447	0.805	-0.983	0.327	-1.218	-0.15	0.108	-0.229	1.293	-0.454	1.091	0.793	-0.382	1.313	-0.554	0.1	0.223	-1.313	0.506	-1.032	-0.753	0.412	-1.26	0.465	-0.21	-0.43	2.326	-0.771	1.982	1.325	-0.803	2.297	-0.82	0.348	0.198	-2.324	0.881	-1.881	-1.343	0.692	-2.272	0.905	-0.318
0.368	1.162	-0.396	0.833	-0.748	0.607	-1.219	-0.387	-0.172	-0.306	1.188	-0.615	0.998	1.018	-0.126	1.263	-0.202	0.547	0.312	-1.211	0.596	-0.997	-0.938	0.168	-1.311	0.207	-0.478	-0.51	2.048	-1.182	1.777	1.67	-0.219	2.257	-0.352	0.976	0.492	-2.144	1.074	-1.779	-1.64	0.311	-2.197	0.356	-1.052
0.984	-0.042	-0.86	0.153	-0.417	1.173	-1.154	0.483	-0.375	0.512	0.26	-1.315	1.337	-0.34	-0.325	0.835	-0.51	0.961	-0.548	-0.268	1.245	-1.354	0.291	0.26	-0.825	0.625	-0.972	0.985	0.47	-2.262	2.388	-0.591	-0.423	1.46	-0.9	1.777	-0.938	-0.593	2.249	-2.416	0.474	0.508	-1.436	1.083	-1.702
0.777	-0.211	-1.016	0.27	-0.537	1.121	-1.072	0.727	-0.156	0.32	0.197	-1.393	1.143	-0.584	-0.534	0.813	-0.828	0.762	-0.302	-0.197	1.341	-1.127	0.615	0.564	-0.907	0.746	-0.861	0.582	0.302	-2.406	2.044	-1.137	-0.888	1.446	-1.437	1.467	-0.555	-0.222	2.425	-1.882	1.206	0.97	-1.574	1.338	-1.447
0.682	0.512	-0.963	0.564	-0.4	1.032	-1.265	-0.144	-0.127	0.048	0.618	-1.231	1.228	0.338	-0.599	1.131	-0.18	0.709	-0.071	-0.574	1.239	-1.221	-0.437	0.498	-1.16	0.159	-0.751	0.229	1.165	-2.136	2.187	0.672	-0.923	2.06	-0.281	1.276	-0.136	-1.073	2.183	-2.173	-0.691	0.979	-2.123	0.283	-1.243
0.538	0.976	-0.721	0.545	-0.38	1.098	-1.067	-0.582	-0.445	-0.042	0.891	-1.125	1.066	0.943	-0.249	1.026	0.118	0.909	0	-0.831	1.152	-0.971	-1.009	0.107	-1.042	-0.08	-0.956	-0.069	1.582	-1.986	1.768	1.76	-0.275	1.82	0.134	1.687	0.019	-1.44	2.115	-1.738	-1.816	0.26	-1.838	-0.252	-1.638
0.394	1.025	-0.663	0.72	-0.419	0.998	-1.106	-0.648	-0.344	-0.154	0.847	-1.091	0.903	1.082	-0.158	1.134	0.124	0.879	0.227	-0.916	1.006	-0.963	-1.037	0.209	-1.128	-0.197	-0.866	-0.317	1.594	-1.879	1.575	1.893	-0.354	2.054	0.285	1.547	0.313	-1.654	1.766	-1.706	-1.732	0.541	-1.938	-0.289	-1.599
-0.815	0.508	-0.882	1.13	0.584	0.276	-0.31	-1.125	0.591	-1.255	-0.034	-0.756	-0.287	0.981	-0.92	0.912	1.032	-0.208	1.224	0.07	0.73	0.334	-1.062	0.904	-0.917	-1.066	0.211	-2.247	0.062	-1.228	-0.44	1.784	-1.59	1.588	1.88	-0.382	2.148	0.05	1.274	0.512	-1.793	1.639	-1.571	-1.905	0.325
-1.161	0.309	-0.384	0.987	0.514	-0.587	0.197	-0.831	0.986	-1.358	-0.138	0.106	-0.83	0.72	-0.84	0.503	0.808	-0.98	1.359	0.151	-0.123	0.888	-0.695	0.915	-0.51	-0.864	0.957	-2.433	-0.224	0.252	-1.496	1.28	-1.424	0.87	1.514	-1.768	2.42	0.326	-0.262	1.541	-1.295	1.514	-0.954	-1.581	1.653
-0.771	-0.066	-0.963	1.199	0.394	-0.196	-0.417	-0.403	1.15	-1.227	-0.338	-0.519	-0.219	0.195	-1.298	1.006	0.535	-0.826	1.255	0.194	0.449	0.249	-0.258	1.324	-1.039	-0.506	0.849	-2.201	-0.418	-0.899	-0.476	0.413	-2.329	1.766	1.062	-1.445	2.253	0.418	0.881	0.451	-0.378	2.411	-1.817	-0.921	1.402
0.342	-0.141	-1.234	0.905	0.177	0.919	-1.231	-0.047	0.346	-0.337	-0.177	-1.359	0.986	-0.081	-0.975	1.355	0.093	0.39	0.354	0.24	1.353	-0.983	0.056	0.994	-1.336	-0.159	-0.332	-0.662	-0.282	-2.356	1.767	-0.281	-1.714	2.414	0.301	0.539	0.613	0.292	2.415	-1.738	0.258	1.657	-2.432	-0.261	-0.611
0.58	0.472	-1.055	0.316	0.5	1.132	-0.842	-0.995	-0.093	0.2	-0.033	-1.38	0.916	0.907	-0.609	0.718	0.969	0.8	-0.118	-0.021	1.328	-0.893	-0.942	0.588	-0.694	-0.937	-0.765	0.133	0.083	-2.485	1.556	1.679	-1.066	1.253	1.649	1.508	-0.239	-0.039	2.377	-1.75	-1.572	1.062	-1.08	-1.744	-1.358
0.871	0.653	-0.754	-0.404	0.504	1.114	-0.355	-1.199	-0.339	0.841	0.094	-1.185	0.824	1.127	-0.234	0.001	1.066	0.931	-0.743	-0.118	1.181	-0.692	-1.207	0.281	0.034	-1.064	-0.923	1.25	0.319	-2.134	1.401	1.993	-0.43	-0.138	1.908	1.596	-1.445	-0.195	2.028	-1.371	-1.985	0.456	0.039	-1.939	-1.567
0.076	0.872	-0.975	0.589	0.265	1.078	-0.604	-1.107	-0.19	-0.339	0.388	-1.341	0.496	1.262	-0.508	0.792	0.868	0.746	0.315	-0.35	1.28	-0.431	-1.223	0.47	-0.69	-0.872	-0.853	-0.705	0.635	-2.327	0.793	2.241	-0.834	1.424	1.37	1.434	0.599	-0.694	2.265	-0.89	-2.069	1.026	-1.363	-1.555	-1.359
0.417	0.788	-0.961	0.522	0.074	1.181	-0.986	-0.836	-0.189	-0.081	0.415	-1.345	0.869	1.075	-0.47	0.901	0.577	0.86	0.064	-0.43	1.373	-0.966	-0.935	0.537	-0.898	-0.641	-0.882	-0.157	0.734	-2.346	1.543	1.854	-0.854	1.75	0.917	1.471	0.24	-0.752	2.421	-1.658	-1.703	0.817	-1.606	-1.111	-1.58
0.765	0.323	-0.941	-0.043	0.751	1.072	-0.779	-1.07	-0.083	0.421	-0.245	-1.24	1.02	0.855	-0.52	0.404	1.181	0.709	-0.493	0.239	1.321	-0.98	-0.883	0.586	-0.505	-1.138	-0.742	0.842	-0.326	-2.266	1.76	1.4	-1.052	0.808	2.03	1.181	-0.868	0.434	2.305	-1.592	-1.568	1.131	-0.816	-1.979	-1.413
0.827	0.375	-0.887	-0.132	0.659	1.098	-0.65	-1.119	-0.167	0.671	-0.228	-1.195	0.898	0.92	-0.473	0.368	1.079	0.814	-0.609	0.15	1.265	-0.979	-0.971	0.457	-0.242	-1.154	-0.762	1.111	-0.264	-2.152	1.565	1.694	-0.866	0.647	1.968	1.384	-1.188	0.391	2.211	-1.757	-1.668	0.779	-0.484	-1.918	-1.46
0.742	-0.057	-1.024	0.359	0.725	0.992	-1.039	-0.779	0.051	0.294	-0.566	-1.228	1.11	0.432	-0.694	0.897	0.909	0.566	-0.203	0.444	1.308	-1.114	-0.51	0.678	-0.835	-0.972	-0.583	0.476	-0.782	-2.271	1.961	0.898	-1.271	1.43	1.741	0.987	-0.411	0.863	2.31	-2.002	-0.819	1.172	-1.602	-1.638	-0.973
1.284	0.057	-0.163	-0.597	0.712	0.878	-0.672	-0.744	-0.765	1.208	-0.377	-0.693	1.224	0.49	0.38	0.05	0.895	0.998	-1.181	0.453	0.655	-1.249	-0.5	-0.401	-0.016	-0.9	-1.057	2.084	-0.727	-1.213	2.104	0.865	0.741	0.167	1.67	1.771	-2.118	0.678	1.208	-2.264	-0.926	-0.567	-0.008	-1.621	-1.823
0.793	-0.362	-0.948	0.439	0.719	0.973	-1.272	-0.315	-0.049	0.223	-0.65	-1.221	1.267	-0.034	-0.567	1.04	0.712	0.607	-0.222	0.657	1.227	-1.27	0.048	0.535	-1.134	-0.634	-0.637	0.471	-1.166	-2.114	2.246	-0.037	-1.054	1.904	1.128	1.047	-0.313	1.132	2.235	-2.225	-0.007	1.03	-1.988	-1.15	-1.088
0.966	-0.597	-0.638	0.237	0.652	1.057	-1.226	-0.07	-0.424	0.476	-0.816	-1.092	1.348	-0.309	-0.116	0.908	0.433	0.917	-0.464	0.799	1.07	-1.377	0.335	0.161	-0.947	-0.48	-0.95	0.818	-1.417	-1.942	2.401	-0.606	-0.142	1.589	0.759	1.729	-0.775	1.39	1.901	-2.394	0.662	0.2	-1.583	-0.75	-1.735
0.648	-0.183	-1.1	0.569	0.675	0.929	-1.207	-0.504	0.163	0.044	-0.535	-1.309	1.17	0.196	-0.765	1.138	0.742	0.478	-0.049	0.521	1.273	-1.175	-0.213	0.828	-1.105	-0.74	-0.525	0.229	-0.914	-2.351	2.035	0.223	-1.366	1.824	1.427	0.857	-0.098	0.956	2.272	-2.113	-0.306	1.436	-1.901	-1.356	-0.829
0.459	-0.413	-1.12	0.013	1.233	0.246	-0.346	-0.853	0.888	0.251	-1.055	-0.876	0.652	0.265	-1.221	0.297	1.31	-0.421	-0.251	1.011	0.882	-0.42	-0.277	1.306	-0.23	-1.333	0.361	0.322	-1.842	-1.652	0.773	0.587	-2.293	0.342	2.369	-0.679	-0.535	1.824	1.528	-0.701	-0.543	2.363	-0.499	-2.318	0.703
0.452	-0.035	-1.206	0.33	0.974	0.779	-0.754	-0.939	0.453	0.104	-0.664	-1.204	0.758	0.61	-1.07	0.633	1.239	0.171	-0.013	0.591	1.3	-0.766	-0.557	1.047	-0.65	-1.22	-0.18	0.109	-1.189	-2.168	1.291	0.93	-1.87	1.24	2.163	0.423	-0.102	1.176	2.172	-1.311	-1.031	1.831	-1.293	-2.049	-0.45
0.171	-0.07	-1.245	0.972	0.437	0.74	-1.104	-0.397	0.514	-0.474	-0.332	-1.237	0.803	0.205	-1.106	1.317	0.489	0.128	0.534	0.315	1.266	-0.781	-0.215	1.081	-1.306	-0.533	-0.111	-0.818	-0.694	-2.183	1.333	0.403	-2.074	2.232	1.013	0.244	0.813	0.684	2.261	-1.37	-0.343	1.949	-2.282	-0.993	-0.218
0.606	-0.121	-1.167	0.413	0.834	0.862	-1.058	-0.697	0.258	0.098	-0.607	-1.285	1.048	0.377	-0.926	0.892	0.931	0.365	-0.123	0.651	1.257	-1.043	-0.364	0.885	-0.965	-0.951	-0.409	0.111	-1.144	-2.283	1.899	0.746	-1.509	1.624	1.675	0.671	-0.139	1.026	2.261	-1.777	-0.581	1.637	-1.626	-1.759	-0.666
0.537	-0.046	-1.158	0.597	0.677	0.894	-1.073	-0.718	0.262	0.005	-0.463	-1.285	1.013	0.366	-0.893	1.098	0.802	0.418	0.042	0.474	1.258	-1	-0.427	0.891	-1.016	-0.957	-0.393	-0.047	-0.684	-2.375	1.791	0.664	-1.592	1.919	1.31	0.9	-0.103	0.972	2.235	-1.86	-0.438	1.549	-1.843	-1.618	-0.714
0.579	-0.129	-1.18	0.71	0.153	1.053	-1.268	-0.068	0.101	-0.095	-0.178	-1.419	1.189	-0.076	-0.819	1.211	0.118	0.595	0.136	0.158	1.389	-1.139	0.008	0.784	-1.252	-0.132	-0.591	-0.196	-0.292	-2.451	2.113	-0.001	-1.344	2.127	0.337	1.072	0.162	0.334	2.477	-2.058	-0.043	1.403	-2.199	-0.231	-1.096
0.046	0.002	-1.274	0.844	0.671	0.684	-0.919	-0.671	0.602	-0.516	-0.436	-1.206	0.601	0.431	-1.197	1.065	0.892	0.071	0.514	0.386	1.226	-0.573	-0.451	1.174	-1.16	-0.816	-0.04	-0.934	-0.654	-2.144	1.1	0.769	-2.13	2.055	1.406	0.038	0.927	0.701	2.182	-1.071	-0.696	2.128	-2.01	-1.533	-0.102
0.761	-0.359	-0.977	-0.726	1.083	-0.066	-0.026	-0.713	1.107	0.957	-0.863	-0.556	0.5	0.195	-1.274	-0.46	1.136	-0.731	-0.918	0.905	0.621	-0.51	-0.223	1.329	0.451	-1.124	0.762	1.534	-1.663	-1.066	0.756	0.346	-2.366	-0.72	1.972	-1.346	-1.624	1.693	0.958	-0.78	-0.418	2.304	0.813	-1.956	1.365
0.994	-0.855	0.079	-0.236	0.65	-1.095	-0.776	0.187	1.026	0.845	-0.86	0.774	1.028	-0.772	-0.62	0.255	0.253	-1.382	-0.707	0.985	-0.678	-1.127	0.665	0.602	-0.337	-0.314	1.329	1.544	-1.482	1.295	1.821	-1.154	-1.086	0.527	0.375	-2.464	-1.242	1.656	-1.266	-1.971	1.132	1.112	-0.637	-0.485	2.384
0.618	-1.058	-0.338	-0.154	0.946	-0.85	-0.52	0.067	1.205	0.449	-1.255	0.325	0.71	-0.749	-0.948	0.178	0.491	-1.292	-0.489	1.284	-0.319	-0.642	0.747	1.007	-0.336	-0.624	1.268	0.852	-2.276	0.449	1.299	-1.171	-1.75	0.585	0.984	-2.224	-0.847	2.312	-0.531	-1.107	1.285	1.843	-0.652	-1.028	2.172
-0.454	-1.027	-0.603	0.487	0.97	-0.626	-0.109	0.094	1.252	-0.664	-1.216	0.028	-0.211	-0.717	-1.157	0.347	0.565	-1.173	0.573	1.266	0	0.224	0.706	1.198	-0.449	-0.516	1.159	-1.105	-2.179	-0.031	-0.209	-1.317	-2.078	0.693	0.951	-2.092	0.918	2.287	-0.11	0.578	1.113	2.117	-0.695	-0.944	2.141
0.118	-1.087	-0.669	-0.115	1.115	-0.583	0.048	-0.071	1.279	0.243	-1.397	-0.046	0.004	-0.657	-1.207	-0.142	0.723	-1.166	-0.085	1.378	0.068	-0.045	0.613	1.232	0.146	-0.761	1.182	0.286	-2.463	-0.194	-0.189	-1.145	-2.157	-0.298	1.307	-2.06	0.04	2.463	0.077	-0.138	1.238	2.153	0.178	-1.299	2.117
-0.784	0.182	-1.021	0.087	0.901	0.911	0.74	-1.083	0.077	-0.572	-0.443	-1.244	-0.907	0.783	-0.688	-0.364	1.253	0.5	0.541	0.453	1.211	0.958	-0.812	0.678	0.445	-1.235	-0.536	-1.014	-0.786	-2.166	-1.61	1.427	-1.198	-0.746	2.196	0.947	0.873	0.747	2.206	1.599	-1.436	1.299	0.796	-2.147	-1.008
-0.817	-0.338	-0.947	0.412	1.235	0.117	0.429	-0.881	0.858	-0.828	-0.993	-0.686	-0.708	0.357	-1.107	-0.023	1.331	-0.434	0.809	0.999	0.659	0.836	-0.379	1.134	-0.028	-1.276	0.501	-1.551	-1.781	-1.101	-1.249	0.632	-1.995	-0.009	2.335	-0.861	1.293	1.794	1.201	1.528	-0.716	1.885	-0.07	-2.303	0.805
0.791	-0.094	-0.988	-0.522	1.105	0.315	-0.241	-1.023	0.734	0.879	-0.764	-0.764	0.625	0.589	-1.084	-0.154	1.348	-0.255	-0.829	0.731	0.857	-0.664	-0.614	1.106	0.208	-1.32	0.284	1.331	-1.333	-1.565	1.17	0.985	-1.932	-0.347	2.378	-0.493	-1.433	1.379	1.456	-1.107	-1.002	1.995	0.321	-2.376	0.394
0.837	0.925	-0.295	-0.804	0.169	0.953	0.052	-1.108	-0.637	1.065	0.453	-0.741	0.523	1.288	0.194	-0.489	0.793	1.006	-1.013	-0.481	0.798	-0.485	-1.294	-0.18	0.602	-0.792	-1.029	1.842	0.884	-1.445	0.845	2.265	0.335	-0.978	1.446	1.691	-1.875	-0.795	1.428	-0.997	-2.265	-0.338	0.96	-1.503	-1.72
1.236	0.33	0.236	-0.979	0.74	0.489	-0.243	-1.09	-0.625	1.401	-0.291	-0.1	0.931	0.906	0.563	-0.454	1.171	0.708	-1.39	0.232	0.235	-0.933	-0.914	-0.49	0.48	-1.152	-0.678	2.42	-0.428	-0.24	1.725	1.641	0.834	-0.915	1.988	1.1	-2.38	0.399	0.29	-1.641	-1.478	-1.045	0.757	-2.074	-1.177
1.003	-0.668	0.426	-0.468	0.98	0.668	-0.507	-0.287	-1.138	0.979	-1.002	-0.2	0.92	-0.256	0.995	-0.006	0.783	1.157	-0.874	1.063	0.1	-0.923	0.224	-1	-0.029	-0.754	-1.156	1.65	-1.823	-0.259	1.631	-0.444	1.781	-0.008	1.416	2.057	-1.578	1.893	0.23	-1.692	0.32	-1.737	-0.069	-1.421	-1.968
0.956	-0.764	0.378	-0.274	1.049	0.678	-0.751	-0.325	-1	0.744	-1.128	-0.148	1.042	-0.324	0.868	0.312	0.867	1.062	-0.832	1.11	0.224	-1.09	0.251	-0.851	-0.339	-0.87	-1.023	1.471	-1.965	-0.348	1.941	-0.458	1.526	0.598	1.532	1.855	-1.479	2.01	0.321	-1.919	0.444	-1.569	-0.448	-1.47	-1.916
1.17	-0.223	0.426	-0.851	0.608	0.719	-0.386	-0.535	-1.119	1.229	-0.573	-0.169	0.968	0.13	0.968	-0.303	0.659	1.171	-1.317	0.471	0.192	-1.006	-0.224	-0.954	0.268	-0.816	-1.147	2.314	-0.879	-0.274	1.718	0.401	1.756	-0.416	1.359	1.951	-2.27	0.896	0.374	-1.723	-0.168	-1.721	0.538	-1.256	-2.149
0.471	-1.221	-0.11	0.562	0.844	0.78	-1.037	0.356	-0.716	-0.068	-1.32	-0.562	0.958	-0.989	0.341	1.016	0.33	0.897	0.043	1.26	0.567	-0.955	0.977	-0.379	-1.005	-0.306	-0.976	-0.104	-2.323	-0.976	1.657	-1.688	0.768	1.856	0.667	1.534	0.026	2.201	1.148	-1.709	1.766	-0.649	-1.715	-0.575	-1.715
0.682	-1.09	0.128	0.629	1.106	-0.251	-1.313	0.012	0.152	0.028	-1.368	0.228	1.255	-0.686	0.023	1.217	0.714	-0.207	-0.032	1.384	-0.248	-1.245	0.701	0.06	-1.23	-0.68	0.214	0.05	-2.445	0.415	2.256	-1.245	-0.094	2.118	1.219	-0.462	-0.001	2.349	-0.605	-2.221	1.184	0.102	-2.197	-1.129	0.574
0.45	-1.151	0.357	0.57	0.711	-0.949	-1.047	0.42	0.545	-0.057	-1.162	0.835	0.899	-1.009	-0.165	1.025	0.161	-0.985	0.049	1.178	-0.821	-0.929	0.986	0.128	-1.05	-0.201	0.896	-0.122	-2.118	1.368	1.717	-1.749	-0.137	1.873	0.294	-1.65	0.057	2.12	-1.348	-1.638	1.718	0.266	-1.824	-0.219	1.614
0.68	-1.071	-0.22	-0.299	0.794	-0.963	-0.427	0.24	1.185	0.628	-1.159	0.467	0.636	-0.875	-0.888	0.093	0.332	-1.353	-0.654	1.157	-0.462	-0.707	0.832	0.897	-0.104	-0.377	1.342	1.271	-1.942	0.863	1.229	-1.493	-1.527	0.035	0.634	-2.417	-1.076	2.117	-0.838	-1.138	1.486	1.562	-0.213	-0.715	2.354
-0.361	-0.782	-0.949	0.262	1.209	-0.256	0.161	-0.462	1.175	-0.359	-1.261	-0.421	-0.309	-0.208	-1.374	0.104	1.016	-0.926	0.399	1.255	0.433	0.418	0.18	1.306	-0.107	-1.065	0.91	-0.685	-2.253	-0.746	-0.668	-0.425	-2.375	0.11	1.944	-1.541	0.661	2.221	0.801	0.702	0.44	2.323	-0.267	-1.845	1.609
-0.372	-1.246	-0.139	0.227	0.735	-1.03	0.074	0.515	1.156	-0.377	-1.244	0.593	-0.339	-1.105	-0.85	0.043	0.131	-1.367	0.377	1.262	-0.585	0.227	1.073	0.798	-0.1	-0.107	1.38	-0.65	-2.242	0.954	-0.439	-1.943	-1.474	0.076	0.165	-2.412	0.775	2.212	-0.931	0.522	1.898	1.43	-0.115	-0.1	2.465
-0.649	-0.937	0.576	-0.34	0.422	-1.195	0.962	0.571	0.655	-0.192	-0.832	1.134	-1.027	-0.931	-0.043	-0.817	-0.083	-1.158	0.167	0.889	-1.098	0.97	0.974	0.088	0.835	0.116	1.164	-0.342	-1.527	1.939	-1.885	-1.655	-0.056	-1.388	-0.267	-2.087	0.344	1.562	-1.892	1.809	1.65	-0.027	1.526	0.104	2.036
-0.375	-1.103	0.534	-0.105	0.18	-1.285	0.415	0.964	0.757	-0.231	-0.769	1.125	-0.487	-1.31	-0.121	-0.344	-0.48	-1.274	0.139	0.825	-1.149	0.532	1.327	0.151	0.239	0.504	1.281	-0.371	-1.407	2.049	-0.755	-2.321	-0.229	-0.544	-0.879	-2.268	0.286	1.423	-2.044	1.104	2.239	0.213	0.433	0.848	2.264
-0.294	-1.177	0.434	-0.797	0.638	-0.783	1.143	0.513	0.297	0.319	-1.145	0.73	-0.861	-1.081	0.08	-1.208	0.068	-0.725	-0.295	1.14	-0.755	0.902	1.051	-0.096	1.264	-0.094	0.642	0.473	-2.023	1.299	-1.626	-1.842	0.269	-2.182	0.058	-1.224	-0.494	2.011	-1.375	1.539	1.992	-0.149	2.168	-0.136	1.302
0.082	-0.472	1.188	-0.948	-0.394	-0.796	0.891	0.824	-0.437	0.645	-0.039	1.24	-0.492	-0.856	1.003	-1.171	-0.762	-0.238	-0.607	0	-1.282	0.515	0.768	-1.02	1.168	0.79	0.191	1.185	-0.103	2.166	-0.907	-1.42	1.795	-2.12	-1.197	-0.285	-1.182	0.095	-2.171	1.005	1.313	-1.779	1.96	1.411	0.38
0.4	-0.616	1.073	-1.204	-0.17	-0.405	0.824	0.657	-0.691	1.015	-0.332	0.883	-0.259	-0.853	1.136	-1.27	-0.576	0.166	-0.992	0.245	-0.926	0.265	0.745	-1.087	1.289	0.467	-0.227	1.83	-0.452	1.606	-0.508	-1.33	2.058	-2.329	-0.863	0.264	-1.805	0.405	-1.68	0.506	1.497	-1.842	2.259	1.048	-0.352
0.121	-0.726	1.066	-1.074	0.669	-0.215	0.905	-0.021	-0.869	0.756	-0.858	0.819	-0.531	-0.528	1.191	-1.303	0.372	0.398	-0.733	0.878	-0.811	0.469	0.382	-1.216	1.229	-0.43	-0.425	1.347	-1.496	1.415	-0.898	-0.746	2.173	-2.215	0.744	0.708	-1.261	1.643	-1.358	0.935	0.72	-2.2	2.205	-0.682	-0.695
0.939	-0.733	0.498	-0.848	0.579	0.795	0.008	0.256	-1.23	1.191	-0.747	-0.124	0.6	-0.628	1.069	-0.488	0.269	1.345	-1.089	0.853	0.169	-0.574	0.62	-1.102	0.596	-0.123	-1.208	1.987	-1.396	-0.344	0.935	-1.14	1.942	-1.064	0.248	2.245	-2.034	1.336	0.247	-1.019	0.958	-1.977	0.96	-0.25	-2.262
1.019	-0.371	0.687	-1.033	0.529	0.599	0.026	-0.099	-1.262	1.299	-0.504	0.086	0.633	-0.177	1.212	-0.659	0.412	1.192	-1.291	0.589	-0.058	-0.598	0.25	-1.232	0.644	-0.431	-1.142	2.225	-1.104	0.118	1.091	-0.358	2.156	-1.201	0.694	2.063	-2.254	1.038	-0.096	-0.998	0.317	-2.24	1.11	-0.726	-2.06
0.899	-0.848	0.399	-0.411	0.933	0.787	-0.471	-0.074	-1.207	0.859	-1.102	-0.272	0.843	-0.494	1.016	0.036	0.622	1.25	-0.801	1.14	0.233	-0.887	0.496	-1.001	-0.01	-0.638	-1.276	1.492	-1.994	-0.429	1.449	-0.893	1.857	-0.034	1.097	2.184	-1.472	1.995	0.489	-1.47	0.898	-1.785	-0.005	-1.128	-2.265
0.293	-1.197	0.324	0.262	0.93	0.812	-0.54	0.277	-1.131	0.076	-1.362	-0.32	0.491	-0.898	0.929	0.506	0.418	1.219	-0.026	1.343	0.315	-0.544	0.938	-0.882	-0.466	-0.415	-1.25	-0.097	-2.372	-0.484	0.925	-1.606	1.594	0.979	0.71	2.154	0.062	2.329	0.545	-0.914	1.646	-1.68	-0.991	-0.732	-2.14
0.709	-1.042	0.333	-0.557	0.714	0.897	-0.089	0.352	-1.221	0.837	-1.105	-0.343	0.529	-0.856	0.973	-0.283	0.275	1.327	-0.77	1.077	0.361	-0.497	0.847	-0.986	0.332	-0.181	-1.311	1.196	-2.063	-0.717	0.841	-1.494	1.818	-0.428	0.453	2.332	-1.421	1.889	0.727	-0.839	1.571	-1.759	0.502	-0.412	-2.422
0.718	-1.062	0.191	-0.269	0.791	1.002	-0.383	0.341	-1.188	0.613	-1.155	-0.482	0.741	-0.852	0.85	0.057	0.297	1.391	-0.553	1.208	0.501	-0.649	0.924	-0.883	-0.056	-0.259	-1.365	1.168	-1.968	-0.937	1.223	-1.552	1.471	0.046	0.525	2.444	-1.085	1.966	0.901	-1.339	1.473	-1.479	-0.167	-0.608	-2.413
-0.302	-1.221	0.224	-0.865	0.94	0.208	1.192	0.307	-0.401	0.372	-1.373	-0.009	-0.939	-0.926	0.435	-1.284	0.41	0.402	-0.339	1.371	-0.009	0.922	0.968	-0.383	1.33	-0.388	-0.361	0.621	-2.442	0.01	-1.647	-1.712	0.701	-2.288	0.631	0.835	-0.701	2.43	-0.14	1.672	1.709	-0.812	2.282	-0.678	-0.669
0.517	-1.139	0.113	-0.768	0.488	0.954	0.229	0.733	-1.005	0.841	-0.962	-0.507	0.144	-1.169	0.732	-0.624	-0.149	1.238	-0.829	1.081	0.57	-0.261	1.169	-0.718	0.676	0.222	-1.169	1.349	-1.839	-0.94	0.259	-2.204	1.163	-1.081	-0.372	2.155	-1.436	1.872	0.945	-0.311	2.083	-1.314	1.273	0.267	-2.156
0.035	-1.266	-0.12	-1	0.531	0.641	0.924	0.716	-0.536	0.586	-1.124	-0.589	-0.53	-1.267	0.365	-1.216	-0.11	0.727	-0.683	1.106	0.479	0.532	1.229	-0.26	1.213	0.12	-0.757	1.125	-2.005	-0.918	-0.876	-2.215	0.485	-2.089	-0.176	1.379	-1.129	2.014	0.821	1.008	2.179	-0.348	2.058	0.248	-1.386
1.167	0.542	0.099	-0.085	-1.23	-0.258	-1.059	0.709	0.138	0.791	1.108	0.245	1.411	-0.084	-0.052	0.625	-1.203	-0.298	-0.776	-1.116	-0.193	-1.409	0.12	0.104	-0.588	1.222	0.145	1.386	2.056	0.297	2.509	-0.272	-0.031	1.034	-2.145	-0.612	-1.428	-2.004	-0.202	-2.484	0.117	0.305	-1.073	2.201	0.292
1.023	0.231	-0.67	-0.679	-1.087	-0.198	-0.358	0.862	0.861	1.1	0.806	-0.314	0.821	-0.369	-0.957	-0.227	-1.245	-0.672	-1.057	-0.807	0.305	-0.876	0.4	1.015	0.206	1.228	0.608	1.981	1.397	-0.519	1.547	-0.637	-1.63	-0.318	-2.181	-1.179	-1.906	-1.455	0.449	-1.567	0.744	1.732	0.296	2.118	1.162
0.542	-0.734	-0.907	-0.764	-0.515	0.894	0.174	1.3	0.021	0.868	-0.11	-1.116	0.161	-1.262	-0.584	-0.623	-1.097	0.551	-0.831	0.133	1.125	-0.271	1.312	0.576	0.581	1.144	-0.534	1.455	-0.404	-2.012	0.287	-2.204	-1.159	-1.023	-2	0.995	-1.39	0.176	2.122	-0.365	2.284	0.942	1.149	2.027	-0.905
-0.131	-1.109	-0.644	-0.934	0.448	0.725	1.116	0.673	-0.061	0.538	-0.951	-0.854	-0.771	-1.138	-0.362	-1.274	-0.124	0.492	-0.488	0.979	0.876	0.771	1.13	0.357	1.343	0.134	-0.461	0.845	-1.778	-1.485	-1.467	-1.971	-0.665	-2.256	-0.333	0.923	-0.877	1.711	1.517	1.358	2.011	0.621	2.278	0.33	-0.959
-0.92	-0.834	-0.288	0.002	0.62	1.156	0.955	0.225	-0.816	-0.565	-0.883	-0.886	-1.164	-0.694	0.356	-0.596	0.244	1.243	0.597	0.932	0.938	1.174	0.699	-0.305	0.641	-0.272	-1.225	-1.071	-1.462	-1.691	-2.084	-1.274	0.553	-1.076	0.472	2.197	1.116	1.522	1.674	2.023	1.244	-0.616	1.005	-0.527	-2.239
-0.964	-0.737	-0.413	-0.275	0.948	0.813	1.187	-0.197	-0.383	-0.426	-1.068	-0.706	-1.403	-0.309	-0.065	-0.953	0.746	0.699	0.422	1.046	0.833	1.322	0.347	0.029	0.914	-0.729	-0.749	-0.702	-1.945	-1.299	-2.396	-0.678	-0.19	-1.626	1.251	1.39	0.845	1.872	1.354	2.357	0.726	0.012	1.646	-1.259	-1.308
-1.17	0.557	-0.057	0.795	0.216	1.03	0.362	-0.776	-0.924	-1.273	0.237	-0.663	-0.933	0.815	0.556	0.244	0.562	1.298	1.249	-0.158	0.656	0.934	-0.845	-0.542	-0.252	-0.618	-1.188	-2.203	0.418	-1.198	-1.732	1.426	1.003	0.512	1.001	2.252	2.231	-0.231	1.07	1.623	-1.533	-1.055	-0.398	-1.074	-2.188
-0.675	0.823	-0.725	-0.264	-0.06	1.248	0.911	-0.773	-0.552	-0.312	0.54	-1.267	-0.961	1.015	-0.104	-0.755	0.43	1.13	0.227	-0.557	1.221	1.063	-0.966	0.104	0.671	-0.484	-1.154	-0.642	0.862	-2.237	-1.611	1.867	-0.148	-1.255	0.772	2.019	0.714	-0.798	2.199	1.79	-1.72	0.308	1.071	-0.96	-2.072
-0.266	1.177	0.48	0.772	-0.825	0.652	-0.486	-0.336	-1.15	-0.6	1.287	-0.124	0.092	0.928	1.03	0.815	-0.315	1.13	0.659	-1.238	0.097	-0.19	-0.965	-1.032	-0.726	0.34	-1.142	-0.956	2.329	-0.241	0.152	1.678	1.849	1.35	-0.59	2.055	1.032	-2.215	0.167	-0.428	-1.757	-1.738	-1.199	0.516	-2.05
-0.812	0.759	-0.662	0.17	0.189	1.264	0.644	-0.906	-0.626	-0.621	0.354	-1.219	-0.897	1.086	-0.039	-0.318	0.72	1.174	0.634	-0.352	1.205	0.928	-0.995	-0.003	0.279	-0.713	-1.173	-1.271	0.528	-2.124	-1.612	1.91	0.016	-0.441	1.145	2.181	1.07	-0.647	2.127	1.745	-1.751	-0.015	0.505	-1.285	-2.129
-0.91	0.936	0.039	0.614	-0.326	1.033	0.273	-0.618	-1.099	-0.994	0.784	-0.651	-0.738	0.98	0.718	0.184	0.168	1.32	0.966	-0.791	0.627	0.794	-0.935	-0.712	-0.267	-0.225	-1.365	-1.61	1.458	-1.143	-1.262	1.707	1.356	0.436	0.459	2.308	1.705	-1.453	1.18	1.234	-1.795	-1.269	-0.448	-0.357	-2.369
0.406	0.724	0.952	0.741	-0.963	-0.4	-1.124	0.273	-0.658	-0.198	1.085	0.823	0.974	0.285	0.958	1.196	-0.756	0.073	0.205	-1.053	-0.839	-0.946	-0.295	-1.037	-1.178	0.815	-0.229	-0.388	1.84	1.597	1.62	0.543	1.767	2.049	-1.463	0.253	0.408	-1.838	-1.463	-1.647	-0.495	-1.804	-2.096	1.331	-0.1
0.644	0.977	0.589	0.606	-0.781	-0.865	-1.253	-0.197	0.255	0.035	1.11	0.918	1.183	0.733	0.204	1.158	-0.376	-0.731	-0.014	-1.092	-0.914	-1.231	-0.702	-0.224	-1.135	0.323	0.7	0.015	2.005	1.531	2.115	1.255	0.321	2.071	-0.718	-1.174	-0.032	-1.971	-1.555	-2.121	-1.371	-0.244	-2.044	0.804	1.168
-0.655	0.557	0.936	1.218	-0.397	0.22	-0.547	-0.172	-1.143	-1.168	0.657	0.435	-0.066	0.382	1.332	1.151	-0.123	0.846	1.157	-0.615	-0.424	0.036	-0.49	-1.293	-1.072	0.159	-0.864	-2.096	1.131	0.79	-0.114	0.873	2.316	1.999	-0.257	1.484	1.961	-1.213	-0.809	0.12	-0.825	-2.305	-1.908	0.321	-1.507
-0.189	0.009	1.306	1.141	-0.267	-0.444	-0.965	0.169	-0.817	-0.859	0.124	1.156	0.506	-0.105	1.321	1.3	-0.317	0.242	0.848	-0.204	-1.079	-0.489	0.082	-1.324	-1.336	0.211	-0.208	-1.548	0.237	1.882	0.879	-0.214	2.329	2.364	-0.45	0.458	1.509	-0.24	-1.94	-0.825	0.277	-2.363	-2.349	0.599	-0.474
-0.625	0.927	0.645	-0.315	-1.236	0.162	0.963	0.309	-0.774	-0.19	1.389	0.332	-0.988	0.368	0.89	-0.805	-0.968	0.605	0.216	-1.367	-0.291	0.992	-0.407	-0.841	0.831	0.985	-0.62	-0.285	2.431	0.513	-1.817	0.588	1.578	-1.558	-1.698	0.944	0.444	-2.406	-0.51	1.681	-0.637	-1.579	1.48	1.722	-1.022
0.719	-0.141	-1.019	-0.119	1.157	0.576	-0.609	-1.036	0.509	0.571	-0.817	-0.959	0.777	0.539	-0.962	0.313	1.351	0.065	-0.546	0.827	1.04	-0.847	-0.537	0.953	-0.287	-1.411	0.02	0.961	-1.315	-1.846	1.557	0.983	-1.576	0.719	2.38	0.057	-1.01	1.548	1.667	-1.617	-1.071	1.584	-0.592	-2.477	-0.044
0.642	-0.302	-1.038	0.178	1.132	0.58	-0.811	-0.876	0.509	0.319	-0.929	-0.982	0.898	0.35	-0.97	0.61	1.256	0.049	-0.266	0.867	1.051	-0.902	-0.365	0.991	-0.636	-1.286	-0.018	0.515	-1.59	-1.809	1.571	0.701	-1.745	0.931	2.327	0.014	-0.416	1.613	1.851	-1.608	-0.631	1.709	-1.015	-2.312	-0.142
0.765	-0.377	-0.938	0.383	0.962	0.779	-1.103	-0.628	0.26	0.268	-0.864	-1.053	1.184	0.156	-0.706	0.943	0.969	0.375	-0.211	0.846	1.11	-1.133	-0.239	0.867	-0.943	-0.97	-0.355	0.415	-1.505	-1.933	2.052	0.203	-1.339	1.567	1.755	0.462	-0.392	1.472	1.962	-2.068	-0.226	1.395	-1.682	-1.596	-0.785
0.507	0.282	-1.13	0.554	0.462	1.081	-1.028	-0.752	0.086	-0.012	-0.164	-1.348	0.966	0.691	-0.772	1.044	0.707	0.631	0.014	0.156	1.412	-0.948	-0.605	0.735	-0.986	-0.802	-0.571	0.048	-0.134	-2.462	1.672	1.144	-1.47	1.762	1.417	1.08	-0.071	0.234	2.497	-1.689	-1.219	1.358	-1.8	-1.425	-1.091
-0.193	-1.09	-0.616	0.834	0.856	-0.425	-0.659	0.293	1.074	-0.647	-1.194	-0.093	0.277	-0.858	-1.069	0.929	0.378	-0.927	0.642	1.248	0.13	-0.26	0.862	1.102	-0.984	-0.297	0.935	-1.11	-2.127	-0.232	0.526	-1.578	-1.833	1.701	0.584	-1.661	1.134	2.159	0.184	-0.444	1.468	1.874	-1.763	-0.646	1.59
-1.078	-0.446	0.434	0.779	-0.752	-0.75	0.338	1.19	0.348	-1.13	0.18	0.773	-0.891	-1.022	0.062	0.27	-1.242	-0.667	1.201	-0.178	-0.758	0.911	1.032	-0.04	-0.268	1.213	0.708	-2.101	0.348	1.248	-1.661	-1.828	0.021	0.428	-2.198	-1.186	2.175	-0.291	-1.206	1.618	1.877	-0.146	-0.552	2.111	1.193
0.004	-0.325	1.257	0.135	-0.913	-0.892	-0.182	1.228	-0.364	-0.116	0.361	1.365	0.117	-0.974	1.017	0.192	-1.353	-0.345	0.053	-0.374	-1.336	-0.099	1.018	-1.035	-0.246	1.299	0.339	-0.161	0.707	2.409	0.258	-1.781	1.688	0.389	-2.336	-0.648	0.185	-0.674	-2.354	-0.267	1.787	-1.74	-0.306	2.319	0.641
-0.004	-0.073	1.242	0.079	-1.067	-0.709	-0.033	1.18	-0.544	-0.011	0.611	1.289	0.002	-0.748	1.054	0.062	-1.407	-0.116	0.097	-0.597	-1.234	0.037	0.817	-1.124	-0.087	1.42	0.104	-0.099	1.116	2.24	0.087	-1.369	1.92	0.175	-2.511	-0.086	-0.017	-1.172	-2.139	-0.176	1.345	-2.036	-0.07	2.495	0.128
0.204	-0.12	1.263	-0.578	-0.953	-0.62	0.439	1.033	-0.658	0.566	0.481	1.188	-0.159	-0.727	1.187	-0.643	-1.238	0.027	-0.452	-0.557	-1.192	0.145	0.722	-1.22	0.694	1.224	-0.026	0.824	0.997	2.126	-0.405	-1.165	2.199	-1.242	-2.151	-0.015	-0.653	-1.083	-2.122	0.218	1.282	-2.169	1.106	2.216	0.016
1.197	0.549	-0.084	-0.166	-0.997	0.732	-0.992	0.442	-0.682	0.865	1.008	-0.514	1.404	0.04	0.359	0.531	-0.895	0.92	-0.833	-0.991	0.444	-1.364	-0.062	-0.391	-0.508	0.885	-0.9	1.464	1.689	-1.045	2.429	-0.008	0.715	0.853	-1.587	1.714	-1.528	-1.682	0.936	-2.362	-0.009	-0.651	-0.95	1.612	-1.587
1.121	0.61	0.17	-0.069	-1.272	-0.339	-1.039	0.704	0.035	0.729	1.208	0.255	1.387	-0.052	0.048	0.624	-1.23	-0.312	-0.755	-1.167	-0.346	-1.354	0.074	-0.084	-0.599	1.265	0.124	1.272	2.054	0.568	2.46	-0.084	0.228	1.091	-2.175	-0.49	-1.309	-2.115	-0.428	-2.397	0.103	0.013	-1.149	2.119	0.424
1.25	-0.321	-0.291	-0.938	-0.848	-0.195	-0.327	1.115	0.548	1.386	0.318	0.024	0.973	-0.933	-0.576	-0.399	-1.228	-0.456	-1.366	-0.378	0.101	-0.991	0.925	0.542	0.361	1.169	0.51	2.479	0.647	0.08	1.678	-1.618	-1.03	-0.731	-2.18	-0.933	-2.459	-0.583	0.112	-1.638	1.715	0.887	0.708	2.145	0.738
1.273	-0.003	0.153	-0.608	-1.096	-0.441	-0.642	1.081	0.317	1.196	0.685	0.397	1.209	-0.685	-0.114	0.015	-1.425	-0.45	-1.158	-0.659	-0.372	-1.158	0.684	0.125	-0.049	1.356	0.484	2.103	1.157	0.759	2.117	-1.239	-0.173	0.044	-2.39	-0.843	-2.121	-1.086	-0.744	-2.103	1.221	0.1	-0.096	2.381	0.832
1.255	0.333	0.252	-0.343	-1.231	-0.037	-0.856	0.878	-0.286	0.997	0.98	0.161	1.38	-0.358	0.306	0.336	-1.322	0.146	-0.973	-0.998	-0.237	-1.293	0.353	-0.361	-0.313	1.3	-0.184	1.7	1.781	0.299	2.4	-0.576	0.629	0.449	-2.436	0.265	-1.723	-1.708	-0.139	-2.328	0.625	-0.584	-0.632	2.359	-0.302
-0.354	1.235	0.121	1.199	-0.314	0.21	-0.842	-0.906	-0.337	-1.01	0.966	-0.081	0.342	1.37	0.318	1.26	0.359	0.338	1.008	-0.945	0.052	-0.307	-1.342	-0.254	-1.288	-0.372	-0.386	-1.763	1.701	-0.275	0.566	2.366	0.579	2.185	0.645	0.675	1.742	-1.777	0.109	-0.45	-2.37	-0.427	-2.286	-0.6	-0.647
-0.349	1.178	0.375	1.072	-0.548	0.441	-0.809	-0.674	-0.719	-0.929	1.066	-0.026	0.252	1.147	0.745	1.146	0.041	0.801	0.868	-1.081	0.045	-0.304	-1.145	-0.647	-1.239	-0.131	-0.689	-1.483	2.011	-0.136	0.527	2.056	1.252	2.1	0.179	1.308	1.58	-1.937	0.011	-0.4	-1.961	-1.363	-2.119	-0.246	-1.302
0.189	0.936	0.863	0.547	-1.126	0.148	-0.854	0.165	-0.919	-0.292	1.288	0.471	0.626	0.473	1.183	0.871	-0.828	0.702	0.14	-1.299	-0.408	-0.686	-0.497	-1.093	-0.938	0.802	-0.637	-0.339	2.31	0.613	1.261	0.875	1.976	1.664	-1.488	1.07	0.409	-2.268	-0.757	-1.161	-0.871	-1.995	-1.554	1.501	-1.124
-0.687	1.068	-0.25	1.208	0.073	0.452	-0.547	-1.157	-0.232	-1.224	0.64	-0.444	-0.083	1.366	-0.03	1.118	0.763	0.407	1.156	-0.624	0.452	0.04	-1.418	0.016	-1.07	-0.765	-0.47	-2.102	1.244	-0.78	-0.078	2.452	-0.017	2.053	1.316	0.688	2.049	-1.096	0.753	0.058	-2.528	0.089	-1.918	-1.351	-0.664
-0.929	0.881	-0.11	1.136	0.351	0.461	-0.195	-1.238	-0.355	-1.305	0.356	-0.335	-0.449	1.307	0.119	0.878	1.022	0.499	1.271	-0.352	0.361	0.475	-1.348	-0.179	-0.84	-0.999	-0.473	-2.326	0.617	-0.575	-0.76	2.311	0.308	1.525	1.742	0.903	2.209	-0.646	0.764	0.856	-2.285	-0.39	-1.534	-1.724	-1.003
-0.909	0.915	-0.109	0.962	0.101	0.864	-0.06	-1.025	-0.752	-1.159	0.556	-0.668	-0.559	1.16	0.46	0.627	0.694	1.008	1.186	-0.507	0.617	0.544	-1.214	-0.436	-0.657	-0.714	-0.973	-2.035	1.024	-1.101	-0.98	2.142	0.771	1.112	1.269	1.822	2.121	-0.902	1.122	0.95	-2.167	-0.829	-1.151	-1.343	-1.793
-0.298	1.218	0.263	1.02	-0.486	0.561	-0.694	-0.716	-0.835	-0.829	1.057	-0.194	0.268	1.248	0.695	1.132	0.164	0.863	0.798	-1.074	0.194	-0.204	-1.224	-0.748	-1.102	-0.132	-0.837	-1.513	1.779	-0.317	0.483	2.224	1.149	1.845	0.187	1.574	1.492	-1.899	0.314	-0.381	-2.167	-1.22	-1.991	-0.162	-1.472
-0.539	0.735	0.94	1.268	0.034	-0.225	-0.732	-0.756	-0.699	-1.145	0.456	0.738	0.124	0.942	1.023	1.249	0.486	0.314	1.141	-0.428	-0.735	-0.124	-0.919	-1.019	-1.252	-0.504	-0.285	-2.003	0.678	1.44	0.249	1.656	1.838	2.227	0.904	0.514	2.052	-0.71	-1.314	-0.361	-1.594	-1.908	-2.158	-0.967	-0.606
-0.299	1.055	0.688	0.695	0.081	-1.056	-0.38	-1.145	0.409	-0.669	0.57	1.082	0.099	1.417	0.221	0.655	0.766	-0.962	0.668	-0.615	-1.024	0.006	-1.385	-0.123	-0.717	-0.775	0.904	-1.125	1.021	1.919	0.206	2.544	0.334	1.06	1.342	-1.737	1.142	-1.035	-1.872	-0.029	-2.45	-0.366	-1.294	-1.401	1.625
0.335	0.783	0.981	0.234	0.352	-1.229	-0.609	-1.096	0.261	0.091	0.267	1.364	0.548	1.21	0.491	0.498	0.901	-0.947	-0.072	-0.218	-1.374	-0.604	-1.144	-0.447	-0.556	-0.921	0.944	0.028	0.525	2.427	1.007	2.109	0.806	0.992	1.507	-1.662	-0.027	-0.551	-2.422	-1.003	-2.049	-0.795	-0.902	-1.636	1.614
-0.303	0.445	1.166	0.873	0.619	-0.705	-0.596	-1.059	-0.485	-0.762	-0.099	1.15	0.189	0.937	1.052	0.918	1.021	-0.147	0.732	0.147	-1.193	-0.154	-0.954	-1.029	-0.983	-1.04	0.108	-1.399	-0.253	2.052	0.4	1.761	1.833	1.628	1.836	-0.181	1.276	0.238	-2.084	-0.249	-1.696	-1.826	-1.597	-1.899	0.263
0.831	0.03	0.965	0.109	0.826	-1.012	-0.947	-0.882	0.026	0.464	-0.499	1.227	1.1	0.55	0.595	0.644	1.091	-0.641	-0.44	0.467	-1.279	-1.092	-0.611	-0.607	-0.694	-1.06	0.655	0.832	-0.847	2.155	1.998	1.004	1.067	1.193	1.923	-1.032	-0.809	0.855	-2.236	-1.922	-1.083	-1.096	-1.275	-1.791	1.192
-0.271	1.151	0.492	0.734	-0.066	-1.035	-0.368	-1.092	0.598	-0.599	0.761	0.971	0.099	1.415	-0.04	0.767	0.632	-0.991	0.639	-0.761	-0.941	-0.051	-1.437	0.086	-0.628	-0.626	1.047	-1.188	1.346	1.704	0.159	2.448	-0.088	1.165	1.135	-1.883	1.054	-1.306	-1.811	-0.173	-2.521	0.103	-1.244	-1.086	1.845
-0.824	0.632	0.765	0.761	0.615	-0.829	0.051	-1.265	0.097	-1.032	-0.008	1.014	-0.522	1.2	0.437	0.41	1.168	-0.589	1.019	-0.009	-0.973	0.575	-1.187	-0.418	-0.48	-1.206	0.607	-1.762	0.02	1.782	-0.994	2.1	0.685	0.821	2.06	-1.098	1.796	0.007	-1.707	0.966	-2.075	-0.775	-0.797	-2.069	1.035
-0.712	1.076	0.244	0.828	0.002	-0.969	-0.159	-1.037	0.685	-0.997	0.709	0.793	-0.352	1.331	-0.341	0.584	0.672	-1.073	0.978	-0.663	-0.753	0.293	-1.317	0.246	-0.607	-0.633	1.033	-1.649	1.222	1.412	-0.663	2.27	-0.503	1.046	1.151	-1.971	1.723	-1.197	-1.307	0.649	-2.334	0.54	-1.004	-1.212	1.923
-0.563	1.003	0.55	0.9	0.197	-0.886	-0.385	-1.196	0.272	-0.971	0.495	0.873	-0.095	1.393	0.16	0.782	0.893	-0.801	0.905	-0.508	-0.882	0.092	-1.414	-0.19	-0.824	-0.848	0.689	-1.61	0.94	1.628	-0.222	2.46	0.275	1.433	1.465	-1.414	1.723	-0.949	-1.409	0.283	-2.446	-0.201	-1.495	-1.481	1.273
-1.038	0.689	0.293	1.098	0.608	-0.414	-0.075	-1.258	0.048	-1.316	0.071	0.382	-0.647	1.248	0.146	0.717	1.225	-0.264	1.364	-0.082	-0.517	0.589	-1.216	-0.215	-0.743	-1.153	0.294	-2.317	-0.079	0.75	-1.111	2.155	0.529	1.24	2.151	-0.47	2.335	-0.058	-0.932	1.118	-2.144	-0.295	-1.228	-2.118	0.591
-1.076	0.681	-0.178	1.119	0.509	-0.381	-0.046	-1.171	0.601	-1.329	0.065	0.08	-0.704	1.218	-0.419	0.699	1.071	-0.562	1.407	-0.097	-0.136	0.642	-1.153	0.47	-0.723	-1.057	0.665	-2.393	0.179	0.269	-1.169	2.138	-0.839	1.291	1.767	-1.199	2.509	-0.214	-0.327	1.088	-2.104	0.893	-1.319	-1.812	1.106
-1.056	0.702	-0.133	1.138	0.353	-0.534	-0.018	-1.026	0.773	-1.346	0.203	0.301	-0.645	1.118	-0.54	0.717	0.869	-0.785	1.44	-0.2	-0.211	0.656	-1.098	0.577	-0.673	-0.823	0.91	-2.382	0.452	0.457	-1.179	1.933	-1.034	1.255	1.6	-1.406	2.426	-0.45	-0.526	1.062	-2.041	0.814	-1.332	-1.563	1.443
-0.671	1.066	-0.163	1.077	-0.165	-0.687	-0.349	-0.837	0.9	-1.066	0.79	0.379	-0.172	1.238	-0.671	0.889	0.431	-1.006	1.145	-0.737	-0.29	0.189	-1.17	0.667	-0.851	-0.4	1.039	-2.037	1.266	0.504	-0.541	2.108	-1.224	1.64	0.771	-1.699	1.94	-1.373	-0.613	0.238	-2.137	1.081	-1.377	-0.788	1.833
-0.892	0.17	0.912	0.792	0.998	-0.295	0.214	-1.165	-0.505	-1.007	-0.525	0.804	-0.663	0.854	0.934	0.403	1.361	0.134	1.098	0.527	-0.679	0.746	-0.814	-0.811	-0.306	-1.395	-0.115	-1.845	-0.948	1.258	-1.297	1.417	1.599	0.641	2.425	0.252	1.945	0.856	-1.375	1.085	-1.436	-1.677	-0.8	-2.323	-0.324
-0.371	-0.352	1.219	0.139	1.251	-0.25	0.358	-0.838	-0.868	-0.252	-0.982	0.961	-0.424	0.33	1.365	-0.106	1.346	0.414	0.412	1.022	-0.864	0.517	-0.276	-1.261	0.152	-1.297	-0.375	-0.626	-1.849	1.537	-0.913	0.532	2.238	-0.437	2.351	0.584	0.393	1.735	-1.683	0.941	-0.576	-2.225	0.343	-2.336	-0.69
-0.147	-0.187	1.246	-0.002	1.197	-0.449	0.217	-0.982	-0.757	-0.047	-0.861	1.094	-0.225	0.508	1.259	-0.076	1.387	0.216	0.078	0.881	-1.056	0.241	-0.49	-1.258	0.191	-1.36	-0.159	-0.123	-1.546	1.875	-0.437	0.907	2.275	-0.205	2.461	0.373	0.142	1.428	-1.964	0.297	-0.949	-2.256	0.165	-2.367	-0.397
-0.146	0.533	1.151	-0.237	0.687	-1.053	0.438	-1.225	-0.154	0.054	-0.074	1.389	-0.321	1.095	0.771	-0.416	1.177	-0.589	-0.029	0.107	-1.404	0.455	-1.075	-0.867	0.387	-1.244	0.566	0.049	-0.282	2.471	-0.632	1.866	1.513	-0.856	2.06	-1.028	0.033	0.387	-2.437	0.77	-1.839	-1.472	0.506	-2.178	1.086
-0.289	-0.677	1.026	-0.664	1.089	-0.291	0.899	-0.396	-0.805	0.221	-1.093	0.819	-0.775	-0.182	1.111	-1.003	0.941	0.274	-0.261	1.113	-0.832	0.747	0.212	-1.143	0.943	-0.95	-0.395	0.463	-1.976	1.478	-1.326	-0.315	2.016	-1.726	1.67	0.652	-0.365	1.997	-1.512	1.385	0.267	-2.012	1.698	-1.682	-0.455
0.925	-0.448	0.778	-1.082	0.516	0.532	0.15	-0.038	-1.281	1.266	-0.556	0.174	0.484	-0.279	1.294	-0.774	0.374	1.169	-1.271	0.606	-0.159	-0.475	0.288	-1.263	0.755	-0.363	-1.146	2.147	-1.083	0.326	0.894	-0.536	2.27	-1.328	0.576	2.052	-2.242	1.076	-0.343	-0.836	0.377	-2.351	1.379	-0.48	-2.023
1.259	0.146	0.115	-0.735	-0.336	1.004	-0.54	0.18	-1.151	1.25	0.257	-0.574	1.129	0.017	0.785	-0.112	-0.307	1.368	-1.286	-0.319	0.531	-1.144	0.07	-0.804	0.126	0.257	-1.383	2.176	0.489	-0.961	2.01	0.016	1.405	-0.172	-0.633	2.363	-2.155	-0.601	0.931	-2.085	0.176	-1.286	0.264	0.577	-2.375
0.749	-0.913	0.445	-0.766	0.62	0.771	0.057	0.33	-1.227	0.939	-0.954	-0.221	0.461	-0.772	1.051	-0.459	0.188	1.269	-0.968	0.993	0.185	-0.435	0.781	-1.064	0.555	-0.148	-1.242	1.76	-1.691	-0.266	0.908	-1.311	1.884	-0.952	0.322	2.202	-1.838	1.628	0.406	-0.876	1.205	-1.936	0.905	-0.241	-2.265
0.266	-1.071	0.634	-0.684	0.906	0.554	0.399	0.143	-1.243	0.605	-1.244	0.019	-0.092	-0.78	1.171	-0.677	0.46	1.113	-0.614	1.259	-0.074	0.06	0.743	-1.212	0.674	-0.492	-1.147	1.043	-2.149	0.118	-0.28	-1.409	2.065	-1.309	0.694	1.992	-0.971	2.223	-0.058	0.233	1.458	-2.01	1.329	-0.763	-1.976
1.098	-0.634	0.294	-0.931	0.082	0.839	-0.11	0.593	-1.12	1.279	-0.468	-0.378	0.792	-0.732	0.939	-0.488	-0.291	1.255	-1.254	0.456	0.329	-0.715	0.788	-0.842	0.521	0.343	-1.275	2.278	-0.828	-0.727	1.407	-1.254	1.641	-0.988	-0.583	2.115	-2.292	0.723	0.665	-1.423	1.317	-1.501	0.883	0.528	-2.221
0.722	-0.642	0.863	-1.015	0.676	0.352	0.377	-0.008	-1.211	1.139	-0.784	0.279	0.237	-0.428	1.349	-0.856	0.442	0.992	-1.044	0.839	-0.319	-0.17	0.39	-1.273	0.893	-0.395	-1.02	1.83	-1.546	0.462	0.431	-0.591	2.42	-1.674	0.73	1.677	-1.897	1.477	-0.601	-0.413	0.791	-2.258	1.525	-0.925	-1.709
0.706	-0.554	-0.891	0.421	0.093	1.18	-1.16	0.466	-0.259	0.158	-0.38	-1.322	1.171	-0.651	-0.363	0.957	-0.298	0.957	-0.177	0.46	1.283	-1.196	0.685	0.376	-0.989	0.196	-0.86	0.24	-0.827	-2.374	2.148	-1.202	-0.567	1.753	-0.592	1.615	-0.159	1.069	2.178	-2.094	1.194	0.598	-1.812	0.346	-1.521
0.222	1.247	0.149	-0.629	-0.628	0.945	0.477	-0.625	-0.994	0.545	1.185	-0.474	-0.113	1.169	0.768	-0.668	-0.032	1.296	-0.514	-1.149	0.502	0.238	-1.216	-0.675	0.676	0.028	-1.181	0.795	2.158	-1.003	-0.216	2.005	1.349	-1.34	-0.035	2.177	-0.824	-2.114	0.796	0.31	-2.047	-1.337	1.112	0.048	-2.219
1.235	-0.196	0.398	-0.547	-0.817	-0.861	-0.625	1.048	0.368	1.159	0.377	0.786	1.18	-0.746	-0.046	0.067	-1.171	-0.821	-1.089	-0.363	-0.823	-1.121	0.774	-0.057	-0.047	1.212	0.737	1.925	0.713	1.41	2.099	-1.378	0.04	0.074	-2.144	-1.378	-2.023	-0.672	-1.259	-2.08	1.34	0.096	-0.143	2.058	1.316
0.703	-0.944	0.512	-1.132	-0.244	-0.5	0.48	1.232	-0.038	1.149	-0.432	0.625	0.191	-1.348	0.332	-1.013	-0.9	-0.269	-1.111	0.451	-0.669	-0.146	1.376	-0.347	1.05	0.956	0.266	2.016	-0.781	1.154	0.171	-2.405	0.671	-1.822	-1.645	-0.571	-2.095	0.682	-1.173	-0.258	2.407	-0.576	1.868	1.638	0.555
1.223	-0.063	0.34	-0.673	-1.083	-0.14	-0.55	1.148	-0.205	1.169	0.646	0.351	1.133	-0.756	0.303	-0.069	-1.402	0.022	-1.196	-0.645	-0.298	-1.125	0.747	-0.353	0.086	1.415	-0.038	2.173	1.077	0.576	1.973	-1.398	0.4	-0.159	-2.433	0.174	-2.151	-1.143	-0.506	-1.925	1.354	-0.634	0.091	2.538	0.003
0.461	1.075	0.58	0.738	-1.05	-0.087	-1.181	0.024	-0.55	-0.166	1.349	0.389	1.03	0.684	0.707	1.196	-0.694	0.332	0.199	-1.285	-0.506	-1.031	-0.632	-0.731	-1.185	0.695	-0.326	-0.262	2.384	0.722	1.872	1.161	1.181	2.068	-1.268	0.623	0.376	-2.268	-0.781	-1.899	-1.174	-1.15	-2.199	1.048	-0.459
0.485	0.832	0.864	0.549	-1.101	-0.197	-1.027	0.345	-0.717	-0.057	1.25	0.659	0.983	0.341	0.95	1.019	-0.883	0.266	0.022	-1.184	-0.643	-0.993	-0.311	-0.978	-0.959	0.967	-0.37	-0.225	2.054	1.41	1.714	0.487	1.736	1.785	-1.627	0.511	-0.026	-2.196	-1.097	-1.645	-0.636	-1.778	-1.619	1.738	-0.667
0.378	0.879	0.899	0.777	-0.979	-0.298	-1.101	0.142	-0.603	-0.196	1.211	0.705	0.919	0.459	0.985	1.192	-0.704	0.208	0.284	-1.142	-0.77	-0.908	-0.477	-0.889	-1.163	0.753	-0.243	-0.365	2.151	1.22	1.512	0.664	1.863	2.011	-1.308	0.366	0.461	-1.98	-1.358	-1.629	-0.974	-1.606	-2.118	1.347	-0.482
0.58	0.374	1.062	0.126	-1.183	-0.368	-0.657	0.86	-0.73	0.309	0.976	0.865	0.783	-0.267	1.139	0.461	-1.242	0.23	-0.219	-0.977	-0.921	-0.744	0.319	-1.165	-0.476	1.311	-0.233	0.54	1.796	1.618	1.408	-0.576	1.93	0.884	-2.288	0.31	-0.509	-1.834	-1.578	-1.448	0.545	-1.909	-0.991	2.237	-0.286
1.166	-0.053	0.47	-0.488	-1.045	-0.584	-0.688	1.119	0.065	1.028	0.622	0.638	1.17	-0.708	0.238	0.121	-1.376	-0.398	-1.043	-0.601	-0.711	-1.182	0.73	-0.262	-0.118	1.383	0.379	1.906	1.021	1.189	2.008	-1.366	0.519	0.247	-2.386	-0.657	-1.869	-1.056	-1.209	-2.068	1.362	-0.482	-0.2	2.377	0.757
0.636	1.001	0.543	0.442	-0.553	-1.084	-1.104	-0.438	0.509	0.117	0.991	0.994	1.079	0.903	0.023	0.999	-0.092	-1.007	-0.177	-0.948	-1.041	-1.103	-0.89	-0.03	-0.976	0.059	0.985	0.254	1.704	1.794	1.928	1.586	0.104	1.753	-0.216	-1.773	-0.129	-1.686	-1.825	-2.02	-1.509	-0.015	-1.726	0.096	1.792
-0.373	1.195	0.149	0.978	-0.293	-0.822	-0.622	-0.956	0.621	-0.846	0.934	0.615	0.131	1.314	-0.346	0.988	0.389	-0.949	0.864	-0.952	-0.601	-0.194	-1.397	0.248	-0.983	-0.415	0.908	-1.387	1.707	1.156	0.273	2.372	-0.519	1.694	0.834	-1.729	1.504	-1.696	-1.043	-0.266	-2.413	0.669	-1.777	-0.677	1.593
-0.61	1.016	0.434	0.336	-0.071	-1.257	0.262	-1.013	0.748	-0.63	0.611	1.021	-0.53	1.295	-0.213	0.023	0.583	-1.285	0.608	-0.723	-1.099	0.577	-1.294	0.184	-0.076	-0.632	1.215	-1.025	1.198	1.864	-0.89	2.34	-0.277	0.048	1.113	-2.182	1.104	-1.273	-1.881	0.995	-2.187	0.436	-0.204	-1.029	2.218
-0.206	0.462	1.175	-0.508	0.61	-1.051	0.731	-1.039	-0.136	0.187	-0.103	1.383	-0.565	0.984	0.83	-0.727	1.051	-0.554	-0.23	0.107	-1.435	0.553	-0.933	-0.818	0.822	-1.027	0.565	0.393	-0.065	2.435	-1.2	1.515	1.541	-1.429	1.825	-0.877	-0.291	0.142	-2.567	1.049	-1.688	-1.439	1.438	-1.808	0.936
-0.781	0.746	0.706	-0.286	-0.195	-1.225	1.071	-0.494	0.503	-0.347	0.624	1.229	-1.122	0.798	0.097	-0.875	0.155	-1.072	0.323	-0.531	-1.234	1.203	-0.71	-0.171	0.827	-0.201	1.111	-0.57	1.014	2.156	-2.09	1.321	0.262	-1.444	0.316	-1.998	0.634	-0.876	-2.161	2.046	-1.377	-0.233	1.416	-0.533	2.013
-0.703	0.737	0.855	-0.43	-0.108	-1.206	1.06	-0.607	0.386	-0.189	0.576	1.322	-1.15	0.822	0.291	-0.961	0.279	-1.03	0.133	-0.477	-1.242	1.097	-0.822	-0.288	0.897	-0.326	1.028	-0.264	0.867	2.407	-1.934	1.497	0.445	-1.6	0.426	-1.842	0.36	-0.855	-2.232	1.968	-1.419	-0.611	1.643	-0.568	1.752
-0.778	1.064	-0.105	-0.408	-1.155	-0.452	1.134	0.079	0.598	-0.258	1.436	0.234	-1.221	0.576	-0.426	-0.955	-0.802	-0.679	0.176	-1.385	-0.167	1.169	-0.626	0.507	0.965	0.774	0.629	-0.337	2.493	0.346	-2.134	1.019	-0.768	-1.713	-1.356	-1.192	0.458	-2.409	-0.389	2.092	-1.099	0.753	1.758	1.378	1.151
-0.16	1.095	-0.658	-0.712	-1.033	-0.36	0.845	-0.085	0.932	0.315	1.336	-0.205	-0.627	0.726	-1.051	-0.941	-0.671	-0.897	-0.403	-1.282	0.2	0.617	-0.731	0.982	0.978	0.568	0.768	0.707	2.299	-0.379	-1.12	1.419	-1.664	-1.706	-1.147	-1.444	-0.662	-2.255	0.466	1.144	-1.257	1.788	1.698	0.995	1.435
-0.167	0.325	-1.232	-0.479	-1.09	0.442	0.674	0.744	0.772	0.189	0.899	-1.031	-0.499	-0.29	-1.296	-0.7	-1.179	-0.227	-0.197	-0.884	1.055	0.513	0.254	1.266	0.761	1.15	0.19	0.315	1.653	-1.818	-0.933	-0.509	-2.271	-1.265	-2.073	-0.399	-0.422	-1.489	1.956	0.945	0.413	2.209	1.292	2.054	0.366
-0.848	0.079	-0.957	0.14	-1.106	0.625	0.67	1.072	0.357	-0.596	0.737	-1.009	-1.006	-0.583	-0.795	-0.343	-1.348	0.168	0.603	-0.729	1.02	0.912	0.631	0.868	0.34	1.4	-0.193	-1.042	1.359	-1.763	-1.773	-1.154	-1.453	-0.617	-2.424	0.363	1.139	-1.393	1.632	1.646	1.156	1.532	0.738	2.349	-0.37
-0.406	0.248	-1.183	0.426	-1.203	0.294	0.009	0.887	0.884	-0.485	0.889	-0.936	-0.27	-0.43	-1.297	0.247	-1.336	-0.398	0.561	-0.942	0.947	0.268	0.36	1.327	-0.251	1.301	0.345	-0.931	1.658	-1.694	-0.548	-0.703	-2.256	0.368	-2.328	-0.648	1.004	-1.597	1.693	0.419	0.801	2.319	-0.382	2.329	0.598
0.367	0.385	-1.155	-0.472	-1.196	0.192	0.082	0.839	0.985	0.533	0.986	-0.835	0.167	-0.258	-1.338	-0.364	-1.241	-0.516	-0.536	-1.004	0.875	-0.199	0.268	1.362	0.347	1.315	0.507	0.861	1.709	-1.497	0.273	-0.438	-2.43	-0.55	-2.332	-0.83	-0.907	-1.812	1.526	-0.303	0.525	2.43	0.677	2.281	0.747
1.271	0.193	0.09	-0.478	-1.222	-0.006	-0.823	0.995	0.048	1.1	0.853	0.188	1.298	-0.497	-0.004	0.213	-1.415	0.018	-1.124	-0.897	-0.018	-1.306	0.506	0.004	-0.249	1.367	0.123	1.89	1.62	0.2	2.377	-0.876	-0.08	0.49	-2.42	-0.077	-1.966	-1.61	-0.074	-2.285	0.913	-0.212	-0.437	2.457	-0.068
0.684	-0.101	-1.084	-1.219	-0.351	0.009	0.548	0.399	1.108	1.183	0.152	-0.7	0.111	-0.339	-1.356	-1.082	-0.483	-0.678	-1.214	-0.205	0.716	-0.055	0.263	1.43	1.089	0.485	0.665	2.148	0.186	-1.124	0.109	-0.568	-2.374	-1.889	-0.777	-1.339	-2.229	-0.107	1.122	-0.132	0.519	2.492	1.963	0.872	1.146
-0.005	-1.285	0.079	-1.033	0.604	-0.503	0.976	0.674	0.462	0.639	-1.198	0.353	-0.666	-1.215	-0.201	-1.324	-0.064	-0.564	-0.638	1.194	-0.379	0.594	1.237	0.294	1.25	0.03	0.586	1.125	-2.157	0.6	-0.932	-2.272	-0.382	-2.268	-0.055	-1.056	-1.024	2.181	-0.698	1.058	2.218	0.361	2.189	0.102	1.085
-0.544	-1.128	0.34	0.53	0.135	-1.175	-0.025	1.003	0.775	-0.732	-0.786	0.954	-0.302	-1.342	-0.32	0.361	-0.553	-1.207	0.633	0.806	-1.015	0.266	1.368	0.228	-0.316	0.53	1.217	-1.075	-1.415	1.736	-0.636	-2.362	-0.503	0.721	-0.956	-2.152	1.13	1.428	-1.723	0.472	2.371	0.573	-0.519	0.911	2.213
-0.392	-1.15	-0.418	-0.726	1.039	-0.228	1.126	0.07	0.56	0.235	-1.401	-0.175	-0.969	-0.771	-0.623	-1.161	0.571	-0.516	-0.206	1.38	0.064	0.954	0.749	0.617	1.166	-0.625	0.428	0.399	-2.468	-0.208	-1.771	-1.345	-1.083	-2.071	1.095	-0.707	-0.385	2.478	0.203	1.761	1.357	1.078	2.049	-1.019	0.922
-0.862	0.181	-0.972	0.979	0.782	0.121	-0.163	-0.933	0.873	-1.172	-0.363	-0.664	-0.466	0.711	-1.158	0.702	1.094	-0.481	1.14	0.385	0.703	0.45	-0.735	1.15	-0.761	-1.019	0.501	-2.03	-0.675	-1.272	-0.708	1.22	-2.121	1.285	1.973	-0.737	2.056	0.608	1.211	0.851	-1.324	1.988	-1.347	-1.874	0.879
-0.349	0.207	-1.218	1.214	-0.157	0.342	-0.94	-0.047	0.884	-1.015	0.257	-0.975	0.348	0.139	-1.323	1.331	-0.066	-0.353	0.947	-0.239	1.003	-0.424	-0.208	1.304	-1.367	0.123	0.362	-1.712	0.42	-1.703	0.627	0.216	-2.368	2.391	0.083	-0.569	1.81	-0.505	1.648	-0.57	-0.405	2.383	-2.367	0.185	0.59
-1.155	0.211	-0.478	0.843	0.944	0.093	0.346	-1.133	0.426	-1.26	-0.468	-0.329	-0.92	0.865	-0.567	0.333	1.327	-0.161	1.26	0.459	0.345	0.968	-0.807	0.617	-0.301	-1.324	0.193	-2.207	-0.834	-0.673	-1.636	1.555	-0.984	0.533	2.323	-0.41	2.244	0.77	0.615	1.6	-1.52	1.044	-0.614	-2.346	0.309
-0.828	0.268	-0.954	0.612	0.966	0.626	0.193	-1.219	0.331	-0.963	-0.447	-1.014	-0.612	0.953	-0.773	0.294	1.383	0.177	0.875	0.441	1.002	0.629	-0.909	0.811	-0.277	-1.387	-0.196	-1.503	-0.769	-1.868	-1.101	1.643	-1.469	0.391	2.49	0.28	1.482	0.719	1.828	1.175	-1.644	1.46	-0.388	-2.474	-0.238
-0.92	0.496	-0.683	0.67	0.752	0.811	0.291	-1.25	-0.109	-1.012	-0.194	-0.875	-0.708	1.126	-0.415	0.25	1.23	0.59	1.005	0.197	0.947	0.791	-1.072	0.344	-0.228	-1.289	-0.547	-1.874	-0.238	-1.528	-1.386	1.937	-0.751	0.539	2.146	1.029	1.816	0.293	1.606	1.443	-1.916	0.551	-0.635	-2.218	-0.951
-1.09	0.545	-0.459	0.869	0.721	0.618	0.2	-1.247	-0.161	-1.253	-0.141	-0.631	-0.815	1.171	-0.234	0.447	1.258	0.467	1.188	0.108	0.705	0.774	-1.108	0.208	-0.393	-1.244	-0.518	-2.085	-0.224	-1.298	-1.433	2.015	-0.25	0.773	2.133	0.858	2.177	0.204	1.144	1.427	-1.978	0.35	-0.808	-2.195	-0.8
-0.859	0.56	-0.755	0.286	0.489	1.161	0.568	-1.087	-0.418	-0.694	0.039	-1.225	-0.934	1.002	-0.2	-0.192	0.981	0.996	0.728	-0.062	1.192	0.86	-1.055	0.2	0.219	-0.995	-0.99	-1.163	0.217	-2.165	-1.612	1.849	-0.337	-0.362	1.762	1.771	1.349	-0.09	2.132	1.508	-1.845	0.373	0.292	-1.803	-1.746
-0.688	0.692	-0.841	-0.178	0.133	1.247	0.827	-0.883	-0.419	-0.327	0.343	-1.335	-0.971	0.953	-0.258	-0.668	0.606	1.048	0.322	-0.361	1.309	0.955	-0.996	0.256	0.595	-0.682	-1.051	-0.54	0.689	-2.333	-1.766	1.738	-0.413	-1.142	1.089	1.816	0.654	-0.576	2.32	1.709	-1.688	0.449	1.178	-1.115	-1.808
-0.523	0.949	-0.652	-0.365	-0.206	1.253	0.925	-0.7	-0.526	-0.047	0.743	-1.145	-0.929	1.055	-0.074	-0.828	0.328	1.13	0.149	-0.704	1.247	0.911	-1.014	0.103	0.832	-0.307	-1.085	-0.289	1.248	-2.115	-1.593	1.842	-0.214	-1.578	0.487	1.97	0.241	-1.332	2.068	1.681	-1.822	0.091	1.449	-0.524	-1.978
-0.91	0.892	0.067	0.445	-0.509	1.099	0.541	-0.286	-1.141	-0.806	0.892	-0.625	-0.902	0.802	0.76	-0.026	-0.098	1.429	0.871	-0.846	0.651	0.961	-0.694	-0.751	0.082	0.174	-1.406	-1.534	1.479	-1.166	-1.622	1.375	1.283	-0.093	-0.387	2.424	1.512	-1.527	1.181	1.67	-1.338	-1.309	-0.115	0.169	-2.47
-0.713	1.053	0.277	0.899	-0.408	0.841	-0.157	-0.599	-1.148	-0.985	0.953	-0.363	-0.353	1.044	0.872	0.646	0.14	1.24	1.055	-0.902	0.344	0.407	-0.994	-0.929	-0.701	-0.132	-1.234	-1.795	1.635	-0.574	-0.68	1.777	1.659	1.078	0.117	2.25	1.874	-1.587	0.602	0.746	-1.671	-1.731	-1.293	-0.38	-2.136
-1.158	0.275	0.409	1.011	0.129	0.781	0.172	-0.384	-1.224	-1.344	0.159	-0.276	-0.841	0.353	1.05	0.527	0.295	1.23	1.389	-0.051	0.237	0.843	-0.44	-1.011	-0.516	-0.27	-1.312	-2.39	0.289	-0.544	-1.492	0.705	1.887	0.847	0.555	2.21	2.432	-0.141	0.473	1.511	-0.949	-1.737	-0.965	-0.505	-2.207
-0.514	1.121	0.391	0.553	-0.74	0.862	-0.043	-0.361	-1.248	-0.694	1.16	-0.282	-0.274	0.958	1.023	0.368	-0.23	1.308	0.666	-1.163	0.326	0.305	-0.927	-1.038	-0.381	0.248	-1.323	-1.294	1.973	-0.477	-0.458	1.75	1.76	0.774	-0.456	2.317	1.177	-2.071	0.482	0.535	-1.611	-1.766	-0.725	0.369	-2.33
-0.215	-0.699	1.033	1.049	-0.26	-0.7	-0.867	0.883	-0.373	-0.761	-0.305	1.091	0.352	-1.023	0.85	1.166	-0.772	-0.237	0.816	0.266	-1.086	-0.464	0.939	-0.953	-1.188	0.714	0.241	-1.288	-0.408	1.985	0.596	-1.831	1.578	2.08	-1.283	-0.363	1.403	0.585	-1.956	-0.716	1.752	-1.679	-1.999	1.364	0.529
0.131	-0.7	1.07	0.89	0.791	-0.414	-1.06	-0.092	-0.666	-0.465	-0.95	0.933	0.713	-0.372	1.096	1.207	0.548	0.133	0.459	0.938	-0.924	-0.769	0.36	-1.11	-1.237	-0.529	-0.151	-0.908	-1.601	1.615	1.355	-0.742	1.848	2.216	1.002	0.363	0.906	1.711	-1.64	-1.246	0.552	-2.01	-2.231	-0.917	-0.153
-0.609	-1.127	0.18	0.595	0.574	0.99	-0.035	0.552	-1.208	-0.728	-1.065	-0.514	-0.432	-1.064	0.853	0.41	0.008	1.341	0.701	1.082	0.524	0.34	1.021	-0.879	-0.409	0.015	-1.415	-1.339	-1.882	-0.898	-0.579	-1.849	1.506	0.853	0.014	2.356	1.265	1.817	1.005	0.538	1.973	-1.439	-0.621	-0.069	-2.44
-0.225	-0.915	0.929	0.232	1.264	0.307	0.03	-0.329	-1.24	-0.299	-1.358	0.39	-0.111	-0.378	1.368	0.137	1.011	0.965	0.298	1.386	-0.388	0.217	0.345	-1.337	-0.156	-0.957	-1.007	-0.538	-2.347	0.699	-0.387	-0.588	2.349	0.305	1.691	1.776	0.494	2.389	-0.712	0.282	0.538	-2.358	-0.242	-1.731	-1.745
0.694	0.567	0.893	-0.623	0.72	-0.84	-0.134	-1.302	-0.024	0.782	-0.117	1.092	0.521	1.182	0.599	-0.334	1.265	-0.496	-0.857	0.102	-1.085	-0.502	-1.153	-0.611	0.241	-1.315	0.569	1.497	-0.188	1.903	0.914	2.13	1.007	-0.569	2.216	-0.823	-1.326	0.084	-2.038	-0.97	-1.978	-1.177	0.603	-2.229	1.061
0.644	0.596	0.935	-0.183	0.575	-1.164	-0.365	-1.219	0.172	0.571	-0.026	1.265	0.664	1.14	0.487	0.123	1.116	-0.839	-0.448	-0.038	-1.372	-0.573	-1.152	-0.498	-0.109	-1.154	0.823	0.888	0.108	2.32	1.027	2.012	0.951	0.097	2.062	-1.371	-0.941	-0.058	-2.339	-1.106	-2.031	-0.875	-0.195	-1.98	1.448
-0.24	1.25	-0.229	-0.854	-0.866	-0.322	1.094	-0.379	0.587	0.393	1.329	0.07	-0.846	1.037	-0.503	-1.214	-0.318	-0.566	-0.395	-1.315	-0.03	0.856	-1.03	0.521	1.206	0.308	0.593	0.783	2.303	0.024	-1.569	1.803	-0.781	-2.164	-0.554	-1.124	-0.727	-2.367	-0.088	1.432	-1.818	0.945	2.245	0.622	0.94
0.352	1.247	0.142	-1.017	-0.296	-0.763	0.633	-0.936	0.584	0.849	0.976	0.555	-0.194	1.378	-0.293	-1.051	0.398	-0.859	-0.878	-0.949	-0.584	0.204	-1.36	0.264	0.997	-0.409	0.827	1.511	1.658	1.022	-0.212	2.492	-0.47	-1.784	0.691	-1.57	-1.488	-1.78	-0.964	0.135	-2.413	0.686	1.913	-0.681	1.386
0.203	1.257	0.04	-0.817	-0.503	-0.895	0.589	-0.791	0.869	0.62	1.083	0.579	-0.24	1.29	-0.501	-0.895	0.184	-1.09	-0.655	-1.142	-0.595	0.25	-1.299	0.513	0.862	-0.203	1.128	1.02	1.969	1.085	-0.307	2.227	-0.987	-1.627	0.384	-1.932	-1.001	-1.964	-1.097	0.494	-2.227	0.918	1.478	-0.303	1.98
-1.198	0.399	-0.115	0.382	-1.072	-0.613	0.823	0.674	0.702	-0.965	0.928	0.309	-1.303	-0.182	-0.521	-0.296	-1.099	-0.791	1.02	-0.922	-0.373	1.296	0.212	0.461	0.264	1.065	0.856	-1.683	1.688	0.635	-2.234	-0.272	-1.073	-0.521	-1.885	-1.425	1.754	-1.726	-0.53	2.183	0.252	1.002	0.484	1.941	1.45
-0.423	0.381	-1.146	0.672	-1.076	0.116	-0.16	0.759	1.033	-0.733	0.907	-0.777	-0.062	-0.183	-1.383	0.639	-1.104	-0.579	0.646	-0.918	0.804	0.229	0.286	1.352	-0.51	1.163	0.59	-1.325	1.519	-1.376	-0.137	-0.3	-2.493	0.887	-1.994	-1.082	1.141	-1.715	1.396	0.158	0.318	2.471	-0.933	2.021	1.076
0.322	-1.15	-0.45	0.408	0.415	1.128	-0.832	0.688	-0.664	-0.079	-1	-1.026	0.667	-1.175	0.171	0.722	-0.192	1.169	0.024	0.961	0.977	-0.803	1.107	-0.125	-0.771	0.187	-1.132	-0.027	-1.868	-1.668	1.34	-1.912	0.232	1.501	-0.309	1.992	0.154	1.862	1.583	-1.334	1.991	-0.169	-1.393	0.347	-2.004
0.407	-0.857	-0.873	0.621	0.101	1.105	-1.046	0.768	-0.198	-0.13	-0.562	-1.269	0.898	-1.053	-0.374	1.009	-0.439	0.882	0.166	0.629	1.207	-0.966	1.021	0.445	-1.022	0.432	-0.81	-0.216	-1.029	-2.211	1.576	-1.874	-0.763	1.721	-0.764	1.508	0.299	1.114	2.148	-1.614	1.822	0.82	-1.722	0.702	-1.583
0.786	-0.729	-0.699	0.434	0.665	1.026	-1.193	0.124	-0.386	0.216	-0.875	-1.111	1.268	-0.493	-0.216	1.031	0.381	0.84	-0.211	0.89	1.091	-1.207	0.572	0.144	-1.031	-0.333	-0.888	0.353	-1.596	-1.925	2.276	-0.926	-0.327	1.861	0.624	1.474	-0.427	1.417	2.014	-2.216	0.902	0.405	-1.913	-0.564	-1.501
0.427	-0.992	-0.663	0.703	0.485	0.96	-1.094	0.581	-0.351	-0.15	-0.858	-1.062	0.958	-1.005	-0.188	1.142	-0.032	0.79	0.194	0.966	1.005	-0.919	1.014	0.197	-1.139	0.089	-0.868	-0.263	-1.603	-1.84	1.673	-1.826	-0.395	1.953	-0.23	1.517	0.275	1.628	1.905	-1.662	1.755	0.325	-2.061	0.102	-1.385
0.43	-1.187	-0.203	0.736	1.019	-0.267	-1.178	0.204	0.472	-0.194	-1.364	0.047	0.999	-0.872	-0.437	1.185	0.506	-0.481	0.207	1.429	-0.011	-1.006	0.901	0.42	-1.22	-0.513	0.464	-0.211	-2.431	0.203	1.733	-1.57	-0.811	2.061	0.793	-0.927	0.352	2.466	-0.123	-1.791	1.556	0.739	-2.116	-0.9	0.916
0.538	-0.672	-0.945	0.721	0.873	0.596	-1.256	-0.167	0.345	-0.105	-0.905	-0.993	1.126	-0.354	-0.785	1.242	0.646	0.167	0.113	1.012	0.94	-1.131	0.359	0.779	-1.236	-0.678	-0.116	-0.193	-1.7	-1.781	1.932	-0.667	-1.436	2.195	1.014	0.503	0.282	1.779	1.709	-2.033	0.638	1.363	-2.192	-1.144	-0.35
0.196	-0.009	-1.28	-0.298	1.117	0.606	0.037	-1.104	0.625	0.224	-0.704	-1.221	0.126	0.686	-1.21	-0.205	1.386	-0.034	-0.363	0.725	1.175	-0.068	-0.684	1.179	0.131	-1.399	-0.004	0.558	-1.311	-2.01	0.335	1.301	-2.075	-0.356	2.473	-0.066	-0.583	1.224	2.118	-0.175	-1.192	2.134	0.376	-2.507	0.015
0.16	-0.076	-1.313	0.746	0.797	0.692	-0.883	-0.705	0.596	-0.353	-0.543	-1.257	0.665	0.4	-1.235	1.005	0.986	0.068	0.397	0.534	1.234	-0.618	-0.469	1.197	-1.04	-0.869	-0.065	-0.807	-0.969	-2.13	1.223	0.713	-2.089	1.828	1.641	0.169	0.742	0.844	2.191	-1.158	-0.749	2.059	-1.884	-1.52	-0.141
1.046	0.662	-0.334	-1.088	0.622	0.274	0.059	-1.275	0.141	1.382	0.063	-0.293	0.595	1.182	-0.324	-0.737	1.221	0.1	-1.311	-0.044	0.432	-0.597	-1.229	0.333	0.707	-1.173	-0.054	2.383	0.149	-0.681	1.065	2.105	-0.593	-1.351	2.096	0.2	-2.339	-0.056	0.556	-1.12	-2.197	0.512	1.322	-2.117	-0.187
0.598	0.982	0.54	-0.705	0.202	-1.012	0.063	-1.173	0.501	0.863	0.483	0.947	0.26	1.378	0.065	-0.523	0.87	-0.916	-0.806	-0.482	-0.98	-0.329	-1.359	-0.048	0.432	-0.863	0.998	1.463	0.813	1.773	0.613	2.385	0.1	-0.95	1.49	-1.744	-1.407	-0.899	-1.81	-0.641	-2.327	-0.09	1.025	-1.488	1.704
0.93	0.831	-0.204	-0.298	-0.848	-0.921	-0.649	0.028	1.111	0.747	1.093	0.435	0.998	0.487	-0.829	0.255	-0.547	-1.236	-0.813	-1.061	-0.495	-0.993	-0.536	0.827	-0.234	0.588	1.267	1.353	1.833	0.834	1.872	0.797	-1.4	0.354	-0.897	-2.206	-1.387	-1.846	-0.948	-1.75	-0.961	1.496	-0.402	1.049	2.255
0.717	0.554	-0.922	0.067	-1.276	0.167	-0.771	0.679	0.743	0.423	1.15	-0.648	0.937	-0.109	-1.092	0.504	-1.239	-0.388	-0.376	-1.168	0.695	-0.931	0.081	1.044	-0.525	1.185	0.361	0.68	2.045	-1.258	1.639	-0.134	-1.815	0.878	-2.253	-0.627	-0.666	-2.012	1.289	-1.72	0.296	1.757	-0.842	2.157	0.684
0.613	0.481	-1.012	-0.203	-1.261	0.109	-0.449	0.798	0.93	0.457	1.098	-0.708	0.69	-0.183	-1.2	0.172	-1.277	-0.486	-0.563	-1.095	0.701	-0.677	0.21	1.237	-0.171	1.293	0.519	0.861	1.942	-1.242	1.299	-0.41	-2.17	0.233	-2.25	-0.923	-0.817	-2.042	1.186	-1.171	0.416	2.142	-0.312	2.299	0.943
0.222	0.917	-0.879	0.419	-1.197	-0.183	-0.695	0.252	1.014	-0.223	1.31	-0.497	0.627	0.422	-1.171	0.69	-0.928	-0.763	0.105	-1.331	0.42	-0.551	-0.423	1.225	-0.775	0.885	0.67	-0.215	2.348	-0.755	1.129	0.712	-2.08	1.157	-1.692	-1.413	0.207	-2.319	0.765	-0.881	-0.667	2.271	-1.27	1.684	1.328
0.908	0.707	-0.571	-0.349	-1.084	-0.526	-0.517	0.379	1.138	0.82	1.166	0.001	0.905	0.171	-1.066	0.113	-0.947	-1.01	-0.765	-1.102	0.021	-0.918	-0.203	1.067	-0.054	0.921	1.085	1.353	2.065	-0.158	1.546	0.262	-1.904	0.253	-1.715	-1.791	-1.479	-1.856	0.005	-1.593	-0.38	1.824	-0.18	1.62	1.926
0.76	0.935	-0.335	-0.146	-1.014	-0.769	-0.578	0.041	1.15	0.586	1.19	0.308	0.848	0.566	-0.938	0.33	-0.695	-1.16	-0.59	-1.226	-0.279	-0.885	-0.572	0.917	-0.204	0.646	1.26	1.167	2.068	0.507	1.372	1.148	-1.66	0.372	-1.129	-2.117	-1.038	-2.175	-0.597	-1.582	-1.032	1.614	-0.377	1.21	2.146
0.864	0.583	-0.759	-0.364	-1.195	-0.231	-0.548	0.672	0.943	0.772	1.146	-0.313	0.854	-0.036	-1.117	0.084	-1.161	-0.775	-0.78	-1.088	0.335	-0.898	0.044	1.05	-0.146	1.238	0.711	1.414	1.986	-0.594	1.519	-0.153	-1.962	0.212	-2.073	-1.289	-1.317	-1.994	0.585	-1.571	0.069	1.88	-0.143	2.023	1.49
0.037	-0.516	-1.187	-0.356	-0.711	1.025	0.305	1.234	0.158	0.178	0.142	-1.368	-0.11	-1.113	-0.877	-0.397	-1.234	0.532	-0.279	-0.105	1.406	0.203	1.095	0.843	0.371	1.229	-0.547	0.384	0.282	-2.428	-0.232	-2.048	-1.489	-0.635	-2.185	0.925	-0.513	-0.234	2.45	0.32	1.949	1.475	0.71	2.221	-0.923
0.062	-0.224	-1.259	-0.183	-0.989	0.785	0.047	1.186	0.459	0.097	0.466	-1.269	0.009	-0.896	-1.111	-0.217	-1.368	0.194	-0.139	-0.5	1.285	-0.043	0.88	1.069	0.118	1.353	-0.203	0.287	0.922	-2.256	0.052	-1.592	-1.902	-0.235	-2.427	0.399	-0.255	-0.879	2.267	0.102	1.612	1.891	0.224	2.428	-0.365
-0.268	-0.732	-0.989	0.308	-0.55	1.135	-0.039	1.26	-0.115	-0.322	-0.132	-1.323	-0.176	-1.263	-0.537	0.128	-1.152	0.817	0.451	0.118	1.327	0.13	1.268	0.564	-0.21	1.109	-0.774	-0.558	-0.082	-2.431	-0.435	-2.219	-0.937	0.36	-2.061	1.425	0.687	0.19	2.353	0.406	2.23	0.929	-0.461	1.995	-1.413
0.012	-0.203	-1.268	-0.638	-0.799	0.741	0.693	0.956	0.497	0.448	0.346	-1.261	-0.416	-0.738	-1.136	-0.851	-1.121	0.139	-0.341	-0.394	1.254	0.467	0.708	1.104	0.852	1.09	-0.172	0.712	0.678	-2.231	-0.789	-1.248	-1.973	-1.537	-1.872	0.321	-0.734	-0.712	2.229	0.76	1.312	1.917	1.429	1.951	-0.191
-0.176	-0.809	-0.968	0.673	-0.409	1.027	-0.469	1.146	-0.067	-0.56	-0.298	-1.206	0.239	-1.24	-0.62	0.767	-1.014	0.669	0.51	0.229	1.268	-0.204	1.201	0.587	-0.685	0.952	-0.716	-1.075	-0.342	-2.157	0.353	-2.231	-1.102	1.305	-1.703	1.189	0.866	0.496	2.272	-0.286	2.203	1.059	-1.23	1.748	-1.244
-0.63	-1.142	0.013	1.27	0.042	0.267	-0.639	1.079	-0.325	-1.19	-0.752	-0.152	-0.01	-1.408	0.173	1.194	-0.644	0.366	1.207	0.715	0.126	-0.015	1.386	-0.234	-1.184	0.651	-0.385	-2.106	-1.326	-0.323	0.117	-2.436	0.404	2.16	-1.153	0.653	2.044	1.376	0.39	-0.102	2.424	-0.337	-2.114	1.166	-0.68
0.806	-0.975	0.333	-0.115	1.036	0.798	-0.712	-0.063	-1.033	0.614	-1.224	-0.276	0.919	-0.61	0.916	0.368	0.696	1.22	-0.603	1.251	0.317	-0.982	0.558	-0.82	-0.366	-0.676	-1.124	0.985	-2.181	-0.583	1.559	-1.151	1.548	0.849	1.295	1.926	-1.022	2.265	0.379	-1.642	1.054	-1.523	-0.679	-1.279	-1.98
0.581	0.388	1.04	-1.111	-0.623	0.128	0.524	0.165	-1.187	1.079	0.58	0.591	0.02	0.132	1.379	-1.036	-0.52	0.835	-1.063	-0.65	-0.604	-0.066	-0.131	-1.43	1.053	0.421	-0.816	1.88	1.19	0.979	0.036	0.335	2.415	-1.842	-0.885	1.502	-1.842	-1.267	-0.95	-0.091	-0.086	-2.51	1.873	0.881	-1.391
-0.581	1.113	0.371	-0.59	-1.135	0.074	1.206	0.057	-0.398	0.037	1.477	0.224	-1.126	0.631	0.487	-1.109	-0.746	0.309	0.011	-1.394	-0.163	1.14	-0.642	-0.479	1.129	0.754	-0.268	0.026	2.535	0.313	-2.062	1.092	0.775	-1.984	-1.369	0.49	-0.164	-2.458	-0.31	2.02	-1.12	-0.828	2.082	1.237	-0.55
-0.878	0.896	0.195	0.495	-0.575	0.99	0.325	-0.357	-1.184	-0.891	0.937	-0.532	-0.762	0.749	0.899	0.072	-0.199	1.397	0.858	-0.883	0.472	0.757	-0.797	-0.871	-0.17	0.107	-1.363	-1.596	1.635	-0.831	-1.38	1.411	1.49	0.182	-0.334	2.416	1.531	-1.633	0.882	1.523	-1.305	-1.517	-0.125	0.311	-2.441
0.063	1.059	0.766	0.294	-1.152	0.437	-0.291	0.117	-1.243	-0.149	1.421	0.166	0.281	0.579	1.272	0.407	-0.792	1.046	0.15	-1.378	-0.226	-0.197	-0.591	-1.283	-0.336	0.819	-1.07	-0.372	2.439	0.398	0.419	1.095	2.247	0.738	-1.502	1.893	0.225	-2.397	-0.383	-0.532	-1.121	-2.148	-0.635	1.429	-1.912
-0.222	1.194	0.365	-0.167	-0.919	0.853	0.305	-0.296	-1.235	-0.089	1.331	-0.324	-0.336	0.922	1.014	-0.282	-0.387	1.3	-0.054	-1.343	0.314	0.293	-0.966	-1.001	0.269	0.394	-1.342	-0.102	2.375	-0.649	-0.571	1.614	1.86	-0.296	-0.745	2.281	-0.027	-2.368	0.532	0.614	-1.658	-1.708	0.582	0.83	-2.277
-0.55	0.239	1.126	-0.398	-0.989	-0.739	0.915	0.748	-0.41	-0.119	0.763	1.173	-0.932	-0.304	0.94	-0.822	-1.094	-0.198	0.072	-0.781	-1.199	0.874	0.338	-0.964	0.847	1.07	0.192	-0.183	1.304	2.123	-1.504	-0.611	1.771	-1.525	-1.873	-0.274	0.172	-1.344	-2.162	1.643	0.587	-1.714	1.477	1.943	0.312
-0.791	0.782	0.547	-0.092	-1.252	0.25	0.916	0.418	-0.804	-0.405	1.267	0.258	-1.085	0.196	0.781	-0.634	-1.077	0.649	0.473	-1.289	-0.175	1.051	-0.254	-0.89	0.68	1.036	-0.639	-0.703	2.293	0.335	-1.968	0.48	1.423	-1.204	-1.847	1.157	0.753	-2.289	-0.362	1.938	-0.458	-1.444	1.104	1.942	-1.094
-0.817	0.917	-0.439	-0.414	-1.207	0.178	1.23	0.29	0.299	-0.256	1.333	-0.376	-1.285	0.399	-0.464	-1.029	-0.949	-0.045	0.243	-1.334	0.405	1.305	-0.394	0.44	1.018	0.944	0.129	-0.476	2.392	-0.566	-2.283	0.666	-0.756	-1.819	-1.642	-0.206	0.5	-2.344	0.507	2.29	-0.729	0.688	1.792	1.658	0.244
-1.04	0.223	-0.72	0.19	-1.208	0.493	0.877	0.951	0.161	-0.738	0.845	-0.822	-1.224	-0.43	-0.549	-0.452	-1.353	0.213	0.819	-0.934	0.708	1.245	0.431	0.518	0.414	1.362	-0.225	-1.394	1.643	-1.224	-2.092	-0.819	-1.031	-0.886	-2.362	0.432	1.417	-1.59	1.311	2.126	0.823	1.034	0.766	2.384	-0.365
-1.138	0.237	-0.526	0.095	-0.769	1.035	1.045	0.506	-0.531	-0.802	0.581	-0.978	-1.343	-0.136	-0.014	-0.62	-0.785	0.963	0.797	-0.662	0.984	1.409	0.171	0.02	0.562	0.769	-1.027	-1.363	1.034	-1.774	-2.474	-0.221	0.008	-1.03	-1.409	1.783	1.37	-1.224	1.761	2.457	0.398	-0.026	1.035	1.483	-1.7
-1.122	0.411	-0.414	0.095	-1.095	0.737	1.049	0.632	-0.309	-0.766	0.924	-0.692	-1.351	-0.143	-0.082	-0.62	-1.113	0.625	0.809	-0.972	0.761	1.39	0.108	0.039	0.591	1.073	-0.617	-1.326	1.62	-1.323	-2.414	-0.303	-0.138	-1.209	-1.804	1.196	1.405	-1.642	1.317	2.494	0.296	0.07	0.998	1.956	-1.155
-1.073	0.676	-0.046	0.484	-0.343	1.134	0.596	-0.291	-1.111	-0.929	0.693	-0.743	-1.093	0.588	0.648	-0.086	-0.037	1.405	0.998	-0.599	0.736	1.025	-0.636	-0.686	0.101	0.09	-1.417	-1.66	1.27	-1.262	-1.963	0.921	1.198	-0.073	-0.066	2.456	1.715	-1.21	1.307	1.857	-1.123	-1.132	0.109	0.109	-2.51
0.354	-0.016	1.269	0.555	-0.735	-0.838	-0.931	0.838	-0.421	-0.146	0.471	1.341	0.813	-0.479	1.059	0.969	-0.911	-0.302	0.069	-0.466	-1.283	-0.818	0.553	-1.034	-0.938	1.039	0.244	-0.343	0.565	2.464	1.546	-0.874	1.722	1.736	-1.67	-0.505	0.238	-0.901	-2.26	-1.46	0.826	-1.897	-1.667	1.848	0.451
-0.324	-0.437	1.159	0.973	-0.485	-0.619	-0.734	0.929	-0.515	-0.885	0.001	1.133	0.252	-0.822	1.056	1.061	-0.916	-0.089	0.767	-0.011	-1.075	-0.235	0.923	-1	-1.161	0.843	0.034	-1.46	-0.106	1.977	0.635	-1.392	1.858	1.882	-1.587	-0.218	1.465	0.116	-1.887	-0.307	1.503	-1.865	-2.014	1.448	0.076
0.244	-0.371	1.23	0.408	-0.704	-1.004	-0.728	1.001	-0.236	-0.147	0.176	1.406	0.591	-0.887	0.916	0.741	-1.076	-0.503	0.022	-0.253	-1.396	-0.677	0.828	-0.884	-0.711	1.035	0.438	-0.154	0.376	2.431	1.163	-1.488	1.679	1.273	-1.955	-0.895	0.174	-0.4	-2.416	-1.154	1.607	-1.562	-1.121	2.037	0.787
-0.041	-0.635	1.09	0.547	-0.533	-1.044	-0.421	1.189	-0.039	-0.34	-0.042	1.345	0.282	-1.162	0.711	0.606	-1.11	-0.667	0.433	0.114	-1.304	-0.196	1.167	-0.702	-0.584	1.085	0.632	-0.69	0.024	2.409	0.314	-2.076	1.239	1.002	-2.001	-1.145	0.744	0.115	-2.346	-0.39	2.038	-1.255	-1.182	1.848	1.083
-0.054	-0.929	0.865	1.141	0.379	-0.484	-1.024	0.631	-0.339	-0.739	-0.788	0.865	0.648	-0.955	0.774	1.405	-0.089	-0.026	0.753	0.817	-0.871	-0.597	1.002	-0.738	-1.322	0.206	0.095	-1.425	-1.501	1.39	1.121	-1.722	1.421	2.471	-0.138	-0.119	1.269	1.257	-1.696	-1.186	1.656	-1.342	-2.398	0.257	0.249
-0.46	-0.636	1.057	1.167	-0.26	-0.455	-0.716	0.851	-0.586	-1.037	-0.271	0.951	0.166	-0.936	1.041	1.21	-0.745	0.094	0.993	0.239	-0.946	-0.161	0.937	-0.955	-1.192	0.666	-0.146	-1.767	-0.475	1.654	0.268	-1.575	1.921	2.19	-1.237	0.095	1.694	0.536	-1.682	-0.238	1.753	-1.68	-2.126	1.106	-0.346
-0.727	0.408	0.969	1.051	-0.66	0.31	-0.282	0.383	-1.225	-1.05	0.756	0.451	-0.308	0.044	1.395	0.845	-0.634	0.989	1.138	-0.598	-0.394	0.264	-0.037	-1.377	-0.79	0.779	-0.938	-2.06	1.208	0.64	-0.54	-0.207	2.396	1.501	-1.166	1.575	2.02	-1.184	-0.671	0.424	-0.214	-2.419	-1.445	1.254	-1.645
-1.103	-0.257	0.677	1.163	-0.278	0.479	-0.067	0.559	-1.159	-1.424	0.032	0.149	-0.664	-0.506	1.131	0.777	-0.509	1.023	1.416	-0.014	-0.121	0.619	0.453	-1.193	-0.74	0.602	-0.996	-2.532	0.015	0.255	-1.07	-1.001	1.978	1.425	-0.905	1.826	2.486	-0.044	-0.205	1.102	0.81	-2.098	-1.395	1.067	-1.747
-1	0.269	0.711	1.189	-0.039	0.543	-0.156	-0.219	-1.277	-1.346	0.196	0.113	-0.539	0.313	1.231	0.844	0.108	1.149	1.41	-0.182	-0.133	0.53	-0.315	-1.275	-0.822	-0.092	-1.139	-2.388	0.427	0.186	-0.987	0.455	2.159	1.384	0.296	2.081	2.467	-0.411	-0.164	0.964	-0.539	-2.239	-1.518	-0.256	-1.968
-0.283	1.086	0.617	1.189	-0.238	-0.442	-0.925	-0.94	-0.172	-0.937	0.789	0.676	0.405	1.237	0.515	1.299	0.418	-0.197	0.94	-0.877	-0.635	-0.412	-1.345	-0.457	-1.342	-0.442	0.106	-1.626	1.596	1.05	0.663	2.306	0.694	2.319	0.78	-0.361	1.694	-1.465	-1.125	-0.713	-2.313	-0.695	-2.288	-0.685	0.43
-0.179	1.062	0.677	1.162	-0.585	-0.039	-0.966	-0.485	-0.669	-0.836	1.052	0.396	0.496	0.961	0.87	1.346	-0.081	0.389	0.851	-1.024	-0.473	-0.495	-1.011	-0.808	-1.322	0.084	-0.448	-1.411	1.813	0.731	0.847	1.618	1.675	2.313	-0.185	0.795	1.527	-1.759	-0.812	-0.925	-1.644	-1.587	-2.392	0.175	-0.73
0.61	1.086	0.332	0.682	-0.978	-0.382	-1.268	-0.081	0.004	-0.038	1.3	0.451	1.196	0.753	0.161	1.248	-0.538	-0.257	0.036	-1.294	-0.462	-1.161	-0.754	-0.201	-1.224	0.598	0.2	-0.059	2.282	0.9	2.032	1.295	0.377	2.134	-1.039	-0.666	0.172	-2.39	-0.632	-2.174	-1.279	-0.341	-2.161	1.065	0.471
0.755	1.017	0.149	0.447	-1.058	-0.633	-1.228	0.047	0.406	0.22	1.319	0.447	1.202	0.605	-0.18	1.076	-0.694	-0.659	-0.23	-1.305	-0.536	-1.26	-0.644	0.173	-1.07	0.736	0.571	0.286	2.306	0.887	2.267	1.046	-0.21	1.885	-1.17	-1.219	-0.419	-2.328	-0.888	-2.181	-1.038	0.415	-1.776	1.168	1.198
-0.296	1.219	-0.295	1.194	-0.463	-0.288	-0.83	-0.757	0.65	-0.911	1.039	-0.004	0.373	1.259	-0.542	1.299	0.178	-0.545	0.959	-1.053	0.001	-0.299	-1.228	0.649	-1.26	-0.197	0.6	-1.664	1.857	-0.093	0.434	2.233	-1.009	2.265	0.352	-1.011	1.663	-1.878	0.049	-0.556	-2.245	0.993	-2.303	-0.317	0.912
-0.137	1.228	0.404	1.127	-0.356	-0.506	-0.943	-0.867	0.184	-0.78	0.997	0.608	0.535	1.322	0.159	1.307	0.304	-0.369	0.822	-0.977	-0.574	-0.507	-1.308	-0.143	-1.266	-0.325	0.513	-1.43	1.685	1.141	0.803	2.394	0.147	2.268	0.565	-0.807	1.469	-1.741	-1.021	-0.916	-2.351	-0.28	-2.305	-0.564	0.625
0.017	1.192	0.523	0.485	-0.21	-1.165	-0.462	-0.977	0.679	-0.288	0.904	1.075	0.322	1.349	-0.076	0.591	0.48	-1.155	0.342	-0.879	-1.039	-0.28	-1.371	0.133	-0.593	-0.472	1.152	-0.431	1.565	1.816	0.469	2.372	-0.203	0.826	0.896	-2.107	0.579	-1.58	-1.841	-0.489	-2.424	0.234	-1.049	-0.84	2.012
0.59	1.085	0.191	0.081	-0.507	-1.147	-0.639	-0.603	0.939	0.308	0.974	0.833	0.807	1.062	-0.481	0.454	0.06	-1.31	-0.29	-1.015	-0.852	-0.798	-1.091	0.456	-0.406	-0.049	1.313	0.618	1.793	1.538	1.339	1.959	-0.806	0.769	0.042	-2.362	-0.638	-1.753	-1.505	-1.32	-1.938	0.863	-0.844	-0.043	2.313
0.712	-0.555	-0.895	-1.248	-0.28	0.082	0.56	0.841	0.809	1.246	-0.194	-0.594	0.097	-0.843	-1.1	-1.122	-0.691	-0.48	-1.23	0.165	0.633	-0.106	0.834	1.102	1.173	0.745	0.428	2.189	-0.434	-1.098	0.203	-1.537	-1.845	-2.031	-1.116	-0.842	-2.18	0.162	1.134	-0.216	1.609	1.86	1.977	1.301	0.801
0.762	-1.01	-0.227	-1.06	0.172	-0.689	0.269	0.817	0.979	1.097	-0.793	0.374	0.332	-1.118	-0.787	-0.835	-0.429	-1.017	-1.162	0.753	-0.28	-0.316	1.127	0.801	0.815	0.411	1.057	2.092	-1.279	0.365	0.558	-2.03	-1.309	-1.55	-0.726	-1.759	-2.027	1.299	-0.582	-0.514	2.074	1.304	1.51	0.71	1.833
0.793	-1.016	-0.167	-1.276	-0.212	0.16	0.488	1.206	0.003	1.296	-0.523	-0.183	0.2	-1.394	-0.13	-1.105	-0.906	0.174	-1.301	0.495	0.136	-0.212	1.406	0.069	1.135	0.871	-0.075	2.3	-0.963	-0.39	0.367	-2.45	-0.2	-1.983	-1.509	0.109	-2.295	0.947	0.34	-0.413	2.424	0.203	2.013	1.602	-0.054
1.214	0.126	-0.453	-0.843	-0.77	-0.583	-0.374	0.707	1.017	1.319	0.538	0.112	0.969	-0.278	-0.977	-0.292	-0.941	-0.993	-1.306	-0.499	-0.116	-0.997	0.438	0.89	0.3	0.892	1.037	2.36	0.807	0.283	1.722	-0.645	-1.685	-0.483	-1.729	-1.739	-2.252	-0.99	-0.104	-1.746	0.778	1.612	0.405	1.629	1.68
1.28	0.115	-0.091	-0.649	-0.665	-0.885	-0.61	0.538	0.973	1.22	0.487	0.498	1.206	-0.274	-0.667	-0.029	-0.785	-1.203	-1.199	-0.489	-0.462	-1.172	0.243	0.677	0.022	0.79	1.149	2.138	0.772	0.966	2.015	-0.331	-1.311	-0.065	-1.101	-2.208	-2.08	-0.894	-0.82	-2.102	0.364	1.234	0.045	1.219	2.147
1.269	-0.242	-0.106	-0.806	-0.279	-0.962	-0.453	0.567	1.027	1.308	-0.006	0.527	1.083	-0.449	-0.731	-0.219	-0.493	-1.299	-1.287	-0.018	-0.523	-1.09	0.492	0.716	0.23	0.581	1.213	2.304	0.048	0.955	1.984	-0.888	-1.267	-0.504	-1.009	-2.228	-2.357	-0.124	-0.898	-1.849	0.912	1.327	0.397	0.953	2.208
0.481	-1.099	-0.489	-1.161	0.376	-0.388	0.637	0.716	0.842	1.04	-0.927	-0.133	-0.139	-1.148	-0.808	-1.195	-0.239	-0.727	-1.001	0.934	0.005	0.112	1.205	0.785	1.084	0.16	0.797	1.89	-1.619	-0.014	-0.194	-2.036	-1.394	-2.052	-0.256	-1.38	-1.764	1.684	-0.035	0.241	2.026	1.508	1.979	0.217	1.397
-1.083	-0.611	-0.154	0.118	1.246	-0.449	1.028	-0.627	0.478	-0.774	-1.127	0.204	-1.261	-0.026	-0.509	-0.535	1.185	-0.678	0.765	1.167	-0.193	1.382	-0.046	0.329	0.57	-1.136	0.552	-1.377	-1.977	0.48	-2.341	-0.073	-0.82	-0.979	2.026	-1.147	1.272	2.122	-0.068	2.404	-0.102	0.728	0.873	-2.014	1.122
-0.473	-0.392	-1.11	0.442	1.223	0.157	0.189	-0.875	0.93	-0.483	-1.019	-0.837	-0.39	0.269	-1.265	0.23	1.306	-0.493	0.624	1.004	0.791	0.479	-0.35	1.297	-0.087	-1.315	0.454	-0.954	-1.747	-1.456	-0.866	0.553	-2.173	0.169	2.336	-0.948	1.062	1.73	1.461	0.655	-0.508	2.326	-0.439	-2.26	0.843
0.976	-0.53	-0.652	-1.146	-0.466	-0.156	0.163	1.029	0.723	1.322	-0.006	-0.393	0.509	-0.987	-0.852	-0.841	-0.944	-0.568	-1.317	0.057	0.27	-0.486	0.986	0.855	0.795	0.972	0.485	2.383	-0.044	-0.618	0.994	-1.824	-1.389	-1.591	-1.522	-1.057	-2.314	0.05	0.573	-0.832	1.569	1.685	1.376	1.692	1.01
-0.341	0.113	-1.251	-0.568	-0.897	0.729	0.88	0.745	0.451	0.108	0.639	-1.269	-0.749	-0.445	-1.103	-0.888	-1.069	0.146	-0.196	-0.617	1.221	0.716	0.405	1.04	0.938	0.996	-0.204	0.202	1.252	-2.163	-1.382	-0.658	-1.893	-1.498	-1.933	0.379	-0.264	-1.135	2.162	1.31	0.777	1.891	1.704	1.789	-0.208
-0.459	1.025	-0.698	-0.654	-0.376	1.038	1.092	-0.589	-0.343	0.117	0.941	-1.081	-0.987	1.005	-0.24	-1.111	0.153	0.863	-0.123	-0.845	1.096	0.92	-1.035	0.19	1.135	-0.078	-0.835	0.35	1.6	-1.918	-1.849	1.672	-0.367	-1.965	0.032	1.508	-0.215	-1.508	1.966	1.731	-1.767	0.365	1.997	-0.17	-1.548
0.153	1.314	0.201	-1.143	-0.569	0.258	1.033	-0.735	-0.373	0.819	1.214	-0.049	-0.52	1.276	0.445	-1.351	0.107	0.438	-0.801	-1.179	0.067	0.576	-1.307	-0.296	1.381	-0.085	-0.403	1.429	2.033	-0.111	-1.033	2.248	0.567	-2.414	0.118	0.658	-1.46	-2.029	-0.008	0.975	-2.228	-0.543	2.399	-0.167	-0.766
0.159	1.214	-0.381	-0.856	-0.257	0.9	0.765	-0.944	-0.445	0.616	0.924	-0.817	-0.305	1.371	0.111	-0.987	0.436	0.911	-0.624	-0.924	0.793	0.388	-1.357	0.008	1.075	-0.419	-0.831	1.147	1.601	-1.471	-0.743	2.406	0.044	-1.779	0.864	1.513	-1.128	-1.695	1.421	0.619	-2.412	-0.129	1.72	-0.793	-1.551
0.366	1.232	0.016	-1.168	-0.349	0.342	0.822	-0.89	-0.384	0.989	1.004	-0.196	-0.286	1.324	0.209	-1.253	0.329	0.485	-0.951	-0.996	0.156	0.285	-1.323	-0.272	1.264	-0.354	-0.444	1.659	1.795	-0.216	-0.579	2.304	0.478	-2.195	0.666	0.886	-1.704	-1.74	0.314	0.59	-2.314	-0.508	2.183	-0.696	-0.892
0.304	1.229	-0.183	-1.166	-0.293	0.455	0.841	-0.917	-0.342	0.935	0.961	-0.41	-0.356	1.358	0.06	-1.301	0.416	0.48	-0.904	-0.959	0.363	0.306	-1.345	-0.133	1.269	-0.384	-0.525	1.67	1.708	-0.655	-0.716	2.394	0.117	-2.288	0.651	0.917	-1.561	-1.728	0.785	0.668	-2.393	-0.138	2.278	-0.679	-0.862
0.399	1.26	0.095	-0.526	-0.598	1.023	0.203	-0.664	-1.087	0.531	1.179	-0.582	0.244	1.2	0.777	-0.41	0.039	1.344	-0.576	-1.167	0.587	-0.077	-1.201	-0.744	0.469	-0.053	-1.307	0.756	2.045	-1.163	0.331	2.153	1.306	-0.76	0.058	2.381	-1.078	-2.051	1.026	-0.21	-2.105	-1.287	0.781	-0.098	-2.337
-0.802	0.958	0.399	0.79	-0.531	0.828	-0.042	-0.386	-1.213	-1.024	0.933	-0.265	-0.496	0.876	1.015	0.481	-0.094	1.251	1.003	-0.897	0.312	0.446	-0.811	-0.993	-0.54	0.091	-1.288	-1.779	1.634	-0.442	-0.831	1.549	1.808	1.003	-0.274	2.202	1.708	-1.632	0.559	0.83	-1.502	-1.785	-0.803	0.127	-2.375
0.229	0.498	1.153	-0.098	-1.235	-0.119	-0.161	0.771	-1.033	0.202	1.108	0.8	0.214	-0.163	1.383	-0.017	-1.242	0.572	-0.163	-1.089	-0.8	-0.245	0.173	-1.389	-0.063	1.293	-0.565	0.473	1.988	1.36	0.473	-0.372	2.414	-0.093	-2.153	1.063	-0.298	-1.971	-1.427	-0.386	0.15	-2.475	-0.098	2.28	-0.935
1.067	0.606	0.397	0.083	-0.957	-0.855	-1.162	0.348	0.452	0.613	1.006	0.763	1.39	0.154	-0.017	0.771	-0.864	-0.8	-0.609	-0.947	-0.813	-1.414	-0.152	0.056	-0.779	0.796	0.798	1.205	1.644	1.307	2.484	0.172	0.068	1.329	-1.59	-1.383	-1.117	-1.554	-1.479	-2.481	-0.154	0.185	-1.393	1.489	1.316
1.036	0.713	-0.025	0.093	-1.34	-0.157	-1.132	0.565	0.222	0.628	1.216	0.224	1.332	0.125	-0.251	0.784	-1.22	-0.293	-0.609	-1.321	-0.004	-1.374	-0.087	0.132	-0.769	1.141	0.288	1.113	2.158	0.294	2.289	0.28	-0.619	1.448	-2.071	-0.392	-1.136	-2.262	-0.117	-2.429	-0.054	0.273	-1.278	2.095	0.465
-0.138	0.964	0.829	1.077	-0.086	-0.692	-0.99	-0.877	-0.177	-0.753	0.697	0.888	0.489	1.123	0.675	1.27	0.481	-0.312	0.751	-0.638	-1.008	-0.54	-1.179	-0.649	-1.336	-0.482	0.311	-1.377	1.189	1.581	0.962	2.022	1.207	2.259	0.877	-0.538	1.481	-1.226	-1.605	-0.836	-2.15	-1.117	-2.369	-0.714	0.566
-0.363	0.982	0.73	1.006	0.118	-0.785	-0.716	-1.091	-0.019	-0.866	0.576	0.932	0.172	1.284	0.437	1.049	0.756	-0.485	0.838	-0.53	-1.018	-0.22	-1.315	-0.474	-1.146	-0.747	0.431	-1.48	0.862	1.812	0.369	2.353	0.723	1.971	1.299	-0.686	1.535	-0.945	-1.694	-0.306	-2.327	-0.848	-1.916	-1.266	0.869
-0.26	1.183	0.406	1.215	-0.324	-0.269	-0.94	-0.828	-0.162	-0.904	0.981	0.461	0.421	1.258	0.306	1.359	0.31	-0.047	0.926	-0.922	-0.454	-0.432	-1.277	-0.312	-1.337	-0.275	-0.012	-1.618	1.656	0.802	0.642	2.242	0.556	2.467	0.555	-0.138	1.679	-1.631	-0.834	-0.842	-2.311	-0.477	-2.362	-0.584	0.15
-0.186	1.152	0.512	1.187	-0.466	-0.018	-1.023	-0.709	-0.409	-0.878	1.006	0.393	0.525	1.161	0.583	1.37	0.117	0.302	0.868	-0.992	-0.328	-0.527	-1.226	-0.521	-1.41	-0.121	-0.227	-1.503	1.889	0.557	0.909	2.037	1.041	2.404	0.159	0.517	1.582	-1.775	-0.67	-0.903	-2.035	-1.106	-2.438	-0.22	-0.541
-0.096	1.199	0.374	1.145	-0.575	0.004	-1.056	-0.647	-0.428	-0.782	1.1	0.284	0.603	1.159	0.414	1.368	0.043	0.229	0.794	-1.129	-0.231	-0.604	-1.207	-0.556	-1.393	-0.02	-0.257	-1.365	1.963	0.598	1.034	2.096	0.749	2.407	0.135	0.434	1.405	-2.051	-0.294	-1.016	-2.101	-0.999	-2.449	0.013	-0.371
0.025	1.222	0.296	0.987	-0.803	0.308	-1.006	-0.449	-0.575	-0.577	1.278	-0.065	0.62	1.012	0.631	1.291	-0.211	0.59	0.577	-1.303	-0.005	-0.691	-1.073	-0.479	-1.205	0.225	-0.603	-0.889	2.261	-0.062	1.028	1.995	0.95	2.255	-0.399	1.02	0.973	-2.298	-0.029	-1.277	-1.883	-0.849	-2.105	0.395	-1.098
0.616	1.095	-0.256	0.577	-0.891	0.726	-1.169	-0.227	-0.446	-0.006	1.197	-0.615	1.175	0.865	0.134	1.104	-0.393	0.775	-0.019	-1.281	0.597	-1.088	-0.875	-0.177	-1.111	0.434	-0.658	-0.021	2.226	-0.981	1.999	1.504	0.106	1.895	-0.779	1.441	0.058	-2.291	0.948	-2	-1.458	-0.347	-1.987	0.852	-1.222
1.017	0.701	0.377	-0.247	-1.159	0.56	-0.8	0.477	-0.893	0.781	1.172	-0.105	1.136	0.161	0.833	0.333	-1.008	0.96	-0.801	-1.185	0.092	-1.132	-0.149	-0.774	-0.388	1.055	-0.901	1.423	2.007	-0.309	2.011	0.211	1.38	0.668	-1.739	1.689	-1.469	-2.06	0.242	-1.995	-0.23	-1.436	-0.568	1.765	-1.672
0.31	1.187	-0.339	0.917	-0.756	0.459	-1.207	-0.413	-0.106	-0.342	1.228	-0.553	0.928	1.016	-0.067	1.336	-0.218	0.359	0.4	-1.202	0.51	-0.924	-0.996	0.144	-1.349	0.213	-0.359	-0.583	2.091	-1.031	1.604	1.829	-0.336	2.35	-0.435	0.587	0.659	-2.171	0.91	-1.721	-1.691	0.464	-2.358	0.337	-0.628
0.808	1.026	-0.143	0.24	-0.964	0.814	-1.072	-0.072	-0.71	0.372	1.275	-0.611	1.162	0.66	0.321	0.809	-0.583	0.958	-0.36	-1.239	0.563	-1.199	-0.704	-0.352	-0.84	0.567	-0.973	0.542	2.306	-0.962	2.061	1.124	0.714	1.452	-0.99	1.747	-0.606	-2.183	1.16	-2.052	-1.21	-0.687	-1.341	0.978	-1.881
0.827	0.971	-0.094	0.403	-1.218	-0.182	-1.269	0.235	0.194	0.265	1.357	0.014	1.296	0.475	-0.214	1.027	-0.93	-0.282	-0.281	-1.372	-0.075	-1.342	-0.514	0.181	-1.057	0.954	0.18	0.438	2.392	0.107	2.329	0.861	-0.164	1.884	-1.611	-0.413	-0.373	-2.42	-0.051	-2.413	-0.847	0.182	-1.772	1.655	0.535
0.096	-0.941	0.845	-0.325	-0.266	-1.207	0.219	1.236	0.357	0.225	-0.396	1.284	-0.06	-1.373	0.31	-0.331	-0.949	-0.985	-0.26	0.449	-1.296	0.11	1.36	-0.342	0.29	0.98	1.015	0.598	-0.764	2.271	-0.089	-2.443	0.565	-0.686	-1.723	-1.734	-0.668	0.812	-2.279	0.278	2.32	-0.569	0.592	1.728	1.76
-1.165	-0.481	0.26	0.826	-0.717	-0.71	0.38	1.124	0.527	-1.248	0.112	0.616	-0.942	-1.036	-0.122	0.289	-1.176	-0.751	1.277	-0.182	-0.581	1.002	0.982	0.237	-0.283	1.124	0.783	-2.164	0.183	1.186	-1.841	-1.6	-0.349	0.44	-1.976	-1.467	2.225	-0.351	-1.005	1.709	1.799	0.291	-0.465	2.121	1.161
-1.023	0.632	-0.495	-0.104	-1.247	0.263	1.049	0.636	0.306	-0.586	1.185	-0.494	-1.344	0.018	-0.449	-0.754	-1.176	0.024	0.534	-1.182	0.498	1.283	0.029	0.521	0.683	1.178	0.076	-1.032	2.08	-0.805	-2.4	-0.083	-0.735	-1.299	-2.086	-0.113	1.243	-2.014	0.69	2.375	0.02	0.855	1.298	2.033	-0.069
-0.602	1.105	-0.206	-0.673	-1.08	0.114	1.298	-0.035	0.119	0.043	1.386	-0.197	-1.184	0.705	-0.172	-1.243	-0.685	0.038	-0.013	-1.354	0.177	1.225	-0.732	0.239	1.225	0.656	-0.019	0.104	2.456	-0.433	-2.073	1.177	-0.485	-2.28	-1.199	0.047	-0.13	-2.414	0.34	2.144	-1.244	0.477	2.182	1.247	-0.012
-0.592	1.101	0.303	-0.526	-0.854	-0.805	1.14	-0.273	0.551	-0.025	1.24	0.735	-1.082	0.833	-0.155	-1.043	-0.385	-0.845	0.047	-1.233	-0.663	1.112	-0.876	0.178	1.043	0.358	0.866	-0.259	2.187	1.226	-1.836	1.564	-0.311	-1.778	-0.686	-1.478	0.049	-2.102	-1.344	1.92	-1.593	0.333	1.851	0.691	1.458
-0.805	0.934	-0.435	-0.443	-1.183	0.204	1.25	0.216	0.174	-0.242	1.361	-0.407	-1.291	0.392	-0.413	-1.072	-0.893	-0.005	0.237	-1.33	0.392	1.326	-0.47	0.316	1.045	0.862	-0.017	-0.329	2.393	-0.702	-2.216	0.828	-0.769	-1.847	-1.723	-0.089	0.359	-2.337	0.75	2.324	-0.714	0.705	1.705	1.629	0.238
0.109	0.956	-0.822	-1.127	-0.633	0.084	1.026	-0.379	0.677	0.787	0.975	-0.609	-0.572	0.807	-0.963	-1.38	-0.161	-0.362	-0.751	-1.042	0.504	0.563	-0.851	0.949	1.372	0.14	0.337	1.325	1.843	-1.081	-1.073	1.627	-1.414	-2.407	-0.133	-0.479	-1.316	-1.891	0.957	1.042	-1.51	1.612	2.41	0.196	0.549
0.735	0.745	-0.783	-1.213	-0.167	-0.253	0.523	-0.639	0.992	1.261	0.586	-0.342	0.136	0.803	-1.153	-1.084	0.235	-0.81	-1.205	-0.546	0.334	-0.123	-0.882	1.09	1.122	-0.339	0.778	2.128	1.148	-0.5	0.216	1.535	-1.906	-1.96	0.56	-1.374	-2.091	-1.151	0.51	-0.371	-1.47	1.86	1.969	-0.479	1.514
0.634	0.399	-1.051	-1.279	0.024	0.029	0.671	-0.409	1.046	1.213	0.22	-0.699	-0.017	0.54	-1.288	-1.201	0.287	-0.578	-1.205	-0.236	0.648	0.034	-0.492	1.31	1.24	-0.286	0.665	2.225	0.359	-1.161	-0.097	0.896	-2.302	-2.124	0.412	-1.167	-2.226	-0.397	1.099	0.02	-0.841	2.28	2.138	-0.462	1.193
0.675	0.878	-0.685	-1.078	-0.493	-0.521	0.487	-0.487	1.118	1.101	0.87	-0.124	0.196	0.766	-1.188	-0.932	-0.036	-1.047	-1.084	-0.917	0.037	-0.086	-0.902	1.059	1.002	-0.022	1.054	1.859	1.605	-0.132	0.122	1.591	-1.944	-1.827	0.1	-1.656	-2.007	-1.471	0.231	-0.172	-1.564	1.91	1.829	-0.021	1.8
-0.514	-0.171	-1.174	-0.712	-0.19	1.047	1.263	0.296	0.143	0.113	0.051	-1.4	-1.086	-0.377	-0.809	-1.222	-0.366	0.56	-0.114	-0.007	1.411	1.126	0.25	0.798	1.268	0.295	-0.525	0.18	0.078	-2.448	-1.861	-0.61	-1.557	-2.153	-0.545	1.068	-0.329	0.085	2.472	1.972	0.363	1.469	2.106	0.782	-1.041
-0.691	-0.049	-1.08	-0.497	-0.429	1.136	1.179	0.497	-0.044	-0.103	0.229	-1.389	-1.195	-0.321	-0.648	-1.08	-0.568	0.724	0.135	-0.233	1.427	1.197	0.296	0.63	1.025	0.641	-0.718	-0.236	0.343	-2.481	-2.142	-0.53	-1.15	-1.803	-1.11	1.204	0.225	-0.415	2.505	2.082	0.62	1.11	1.894	1.049	-1.216
-0.683	-0.644	-0.866	-0.519	0.338	1.119	1.252	0.235	-0.2	-0.074	-0.65	-1.245	-1.215	-0.581	-0.382	-1.067	0.03	0.84	0.103	0.601	1.283	1.269	0.476	0.452	1.102	-0.046	-0.823	-0.177	-1.08	-2.209	-2.106	-0.907	-0.785	-1.999	0.068	1.418	0.079	1.138	2.19	2.207	0.923	0.819	1.88	0.027	-1.557
-0.717	0.063	-1.049	-0.506	0.23	1.18	1.241	-0.39	-0.13	-0.154	-0.188	-1.432	-1.186	0.294	-0.542	-1.113	0.347	0.827	0.158	0.087	1.403	1.238	-0.391	0.547	1.098	-0.378	-0.797	-0.433	-0.194	-2.457	-2.116	0.564	-1.109	-1.905	0.659	1.47	0.209	0.127	2.458	2.225	-0.551	1.042	1.979	-0.376	-1.408
-0.58	-0.566	-1.025	-0.701	0.564	0.931	1.273	0.046	0.073	0.062	-0.686	-1.254	-1.157	-0.372	-0.691	-1.255	0.31	0.547	-0.073	0.747	1.212	1.188	0.331	0.717	1.216	-0.225	-0.582	0.136	-1.232	-2.234	-2.076	-0.772	-1.072	-2.155	0.622	1.044	-0.126	1.354	2.035	2.096	0.408	1.309	2.144	-0.486	-1.032
-0.427	-0.494	-1.097	-0.633	-0.281	1.079	1.033	0.725	0.003	0.131	-0.173	-1.34	-0.942	-0.775	-0.717	-1.062	-0.685	0.68	-0.155	0.158	1.343	0.877	0.765	0.683	1.085	0.591	-0.687	0.265	-0.26	-2.456	-1.637	-1.201	-1.385	-1.735	-1.276	1.296	-0.118	0.287	2.47	1.474	1.44	1.279	1.817	1.129	-1.167
-0.117	-0.37	-1.23	-0.417	-0.775	0.984	0.575	1.113	0.246	0.227	0.243	-1.368	-0.435	-0.954	-0.951	-0.603	-1.208	0.471	-0.18	-0.258	1.39	0.439	0.931	0.922	0.647	1.168	-0.462	0.367	0.467	-2.432	-0.915	-1.559	-1.698	-1.084	-2.107	0.837	-0.363	-0.457	2.405	0.737	1.67	1.646	1.161	2.064	-0.76
-0.976	-0.218	-0.802	-0.025	-0.455	1.195	1.017	0.701	-0.408	-0.607	0.189	-1.253	-1.239	-0.589	-0.262	-0.667	-0.685	1.035	0.628	-0.18	1.212	1.268	0.616	0.269	0.653	0.714	-1.035	-1.005	0.215	-2.211	-2.216	-1.079	-0.438	-1.143	-1.116	1.854	0.954	-0.336	2.229	2.192	1.118	0.428	1.182	1.132	-1.828
-0.803	-0.246	-0.962	-0.415	-0.102	1.231	1.194	0.384	-0.224	-0.237	-0.113	-1.368	-1.273	-0.356	-0.434	-1.036	-0.212	0.937	0.248	0.034	1.4	1.229	0.419	0.483	1.013	0.314	-0.911	-0.487	-0.118	-2.476	-2.255	-0.639	-0.889	-1.841	-0.519	1.53	0.509	-0.004	2.416	2.275	0.703	0.792	1.856	0.491	-1.481
-0.27	-0.397	-1.213	-0.961	0.419	0.752	1.172	-0.096	0.486	0.42	-0.502	-1.23	-0.942	-0.259	-1.06	-1.388	0.294	0.204	-0.435	0.499	1.213	0.895	0.166	1.077	1.309	-0.374	-0.145	0.871	-0.757	-2.153	-1.626	-0.432	-1.878	-2.414	0.458	0.342	-0.697	0.905	2.191	1.585	0.478	1.764	2.421	-0.477	-0.325
-0.687	-0.534	-0.92	-0.581	0.405	1.088	1.271	0.159	-0.178	-0.094	-0.521	-1.297	-1.208	-0.473	-0.445	-1.125	0.105	0.815	0.034	0.667	1.235	1.24	0.449	0.47	1.163	-0.155	-0.803	-0.118	-0.993	-2.29	-2.106	-0.964	-0.716	-2.04	0.259	1.369	0.052	1.01	2.295	2.147	0.897	0.766	2.056	-0.281	-1.399
-1.233	0.176	-0.246	0.618	0.755	0.817	0.666	-0.929	-0.626	-1.133	-0.379	-0.672	-1.184	0.702	0.202	-0.013	1.112	0.831	1.192	0.32	0.699	1.231	-0.704	-0.31	0.026	-1.047	-0.88	-2.14	-0.532	-1.132	-2.108	1.224	0.385	-0.157	1.874	1.572	2.064	0.558	1.291	2.143	-1.269	-0.415	0.078	-1.859	-1.571
-1.13	0.48	0.352	0.745	-0.529	0.88	0.328	-0.013	-1.28	-1.161	0.694	-0.308	-0.979	0.207	0.965	0.235	-0.372	1.344	1.17	-0.644	0.312	0.904	-0.34	-1.049	-0.303	0.308	-1.376	-1.956	1.421	-0.445	-1.717	0.229	1.705	0.321	-0.625	2.391	2.183	-0.926	0.628	1.598	-0.651	-1.827	-0.296	0.699	-2.339
-1.096	0.094	0.681	1.101	-0.532	0.515	0.03	0.378	-1.186	-1.382	0.337	0.071	-0.699	-0.177	1.22	0.698	-0.554	1.117	1.394	-0.453	-0.143	0.714	0.124	-1.179	-0.643	0.583	-1.061	-2.441	0.523	0.025	-1.079	0.006	2.191	1.149	-0.917	2	2.355	-0.817	-0.286	1.143	0.338	-2.119	-1.21	1.008	-1.835
-1.007	0.463	0.633	0.69	-0.991	0.485	0.271	0.474	-1.173	-1.108	0.871	0.043	-0.805	-0.006	1.143	0.228	-0.951	1.021	1.074	-0.932	-0.113	0.769	-0.013	-1.135	-0.268	0.901	-1.089	-1.904	1.539	0.139	-1.307	0.11	2.084	0.357	-1.604	1.856	1.951	-1.574	-0.15	1.42	-0.009	-2.007	-0.407	1.665	-1.793
-0.695	0.58	0.91	0.326	-1.227	0.117	0.382	0.643	-1.042	-0.654	1.125	0.472	-0.65	-0.029	1.241	-0.039	-1.18	0.706	0.647	-1.134	-0.495	0.724	0.055	-1.188	0.002	1.155	-0.772	-1.177	2.015	0.967	-1.244	-0.08	2.12	0.047	-2.044	1.29	1.134	-2.065	-0.782	1.155	0.125	-2.22	0.055	2.058	-1.338
0.405	-0.884	0.848	0.095	-0.191	-1.264	-0.463	1.113	0.423	0.155	-0.43	1.353	0.612	-1.237	0.254	0.421	-0.788	-1.081	-0.217	0.444	-1.302	-0.526	1.288	-0.257	-0.357	0.811	1.049	0.256	-0.773	2.355	1.068	-2.204	0.402	0.375	-1.531	-1.868	-0.357	0.696	-2.383	-0.934	2.248	-0.397	-0.496	1.476	1.877
0.166	-0.797	1	-0.408	-0.447	-1.119	0.142	1.265	0.161	0.366	-0.198	1.369	-0.066	-1.295	0.525	-0.465	-1.076	-0.804	-0.337	0.236	-1.305	-0.058	1.307	-0.499	0.323	1.075	0.814	0.721	-0.54	2.342	-0.008	-2.267	0.916	-0.619	-1.92	-1.373	-0.36	0.37	-2.4	-0.052	2.326	-0.915	0.556	1.981	1.33
-0.7	-1.063	-0.085	-0.33	1.062	-0.667	1.068	-0.005	0.684	-0.183	-1.35	0.332	-1.138	-0.661	-0.495	-0.858	0.677	-0.907	0.234	1.325	-0.357	1.107	0.663	0.504	0.927	-0.669	0.763	-0.331	-2.366	0.508	-2.008	-1.141	-0.757	-1.47	1.22	-1.522	0.376	2.365	-0.638	1.876	1.168	1.079	1.466	-1.231	1.491
-0.753	-1.022	-0.234	-0.101	1.078	-0.712	0.885	-0.093	0.949	-0.396	-1.313	0.318	-1.018	-0.62	-0.754	-0.622	0.698	-1.062	0.433	1.332	-0.29	1.061	0.537	0.74	0.615	-0.722	1.054	-0.892	-2.247	0.572	-1.706	-1.128	-1.41	-1.105	1.267	-1.802	0.745	2.386	-0.486	1.865	1.059	1.231	1.021	-1.249	1.891
0.523	-0.993	-0.711	-0.076	1.192	-0.46	-0.409	-0.273	1.169	0.414	-1.387	-0.14	0.568	-0.503	-1.206	0.194	0.874	-1.062	-0.33	1.371	0.194	-0.54	0.395	1.189	-0.214	-0.923	1.019	0.889	-2.387	-0.142	0.918	-0.732	-2.185	0.387	1.684	-1.835	-0.717	2.349	0.301	-1.036	0.833	2.055	-0.532	-1.574	1.811
-0.107	-1.051	0.785	0.787	-0.048	-1.025	-0.656	1.006	0.259	-0.57	-0.674	1.128	0.371	-1.323	0.363	0.959	-0.686	-0.78	0.539	0.585	-1.149	-0.36	1.245	-0.325	-0.883	0.632	0.806	-1.098	-1.028	2.004	0.708	-2.32	0.489	1.67	-1.141	-1.434	0.803	1.107	-2.059	-0.61	2.283	-0.466	-1.528	1.319	1.421
-1.009	-0.099	0.718	0.702	-1.068	-0.157	0.345	1.143	-0.492	-1.084	0.574	0.598	-0.804	-0.77	0.777	0.271	-1.38	0.25	1.068	-0.637	-0.536	0.849	0.748	-0.777	-0.209	1.406	-0.149	-1.975	1.131	0.967	-1.587	-1.367	1.189	0.354	-2.41	0.346	1.831	-1.151	-0.999	1.527	1.347	-1.373	-0.239	2.509	-0.293
-0.252	-1.097	0.635	0.704	0.003	-1.076	-0.35	1.121	0.481	-0.526	-0.671	1.119	0.066	-1.399	0.084	0.642	-0.682	-0.95	0.7	0.689	-1.073	0.036	1.411	-0.066	-0.674	0.716	0.982	-1.124	-1.216	1.855	0.108	-2.452	0.219	1.058	-1.195	-1.767	1.145	1.194	-1.917	-0.174	2.4	-0.241	-1.256	1.204	1.755
0.008	-1.237	0.259	1.12	0.58	-0.348	-1.103	0.711	0.154	-0.694	-1.122	0.465	0.711	-1.204	0.032	1.408	-0.067	-0.258	0.717	1.169	-0.384	-0.688	1.235	-0.047	-1.393	0.116	0.344	-1.195	-2.077	0.743	1.204	-2.161	0.011	2.502	-0.182	-0.543	1.118	2.029	-0.805	-1.267	2.115	-0.116	-2.424	0.149	0.558
-0.658	-1.118	-0.314	0.763	0.573	-0.868	-0.057	0.499	1.19	-0.897	-1.063	0.376	-0.33	-1.061	-0.962	0.546	0.043	-1.261	0.898	1.036	-0.376	0.423	0.966	0.955	-0.527	-0.031	1.288	-1.655	-1.783	0.622	-0.715	-1.783	-1.75	0.978	0.087	-2.205	1.518	1.86	-0.697	0.645	1.729	1.648	-0.886	0	2.363
0.067	-1.245	-0.331	0.922	0.766	-0.417	-0.966	0.443	0.719	-0.523	-1.275	0.078	0.658	-1.083	-0.702	1.167	0.194	-0.736	0.58	1.237	-0.051	-0.639	1.061	0.622	-1.189	-0.218	0.718	-0.978	-2.278	0.192	1.09	-1.786	-1.316	2.056	0.448	-1.374	0.948	2.295	-0.03	-1.126	1.86	1.233	-2.044	-0.455	1.367
0.377	-1.064	0.605	0.735	0.493	-0.907	-1.133	0.518	0.241	-0.211	-1.025	0.939	0.917	-0.996	0.188	1.172	-0.078	-0.752	0.203	1.001	-0.97	-0.944	0.983	-0.247	-1.185	-0.011	0.7	-0.38	-1.795	1.698	1.716	-1.616	0.509	2.095	-0.09	-1.328	0.506	1.831	-1.578	-1.788	1.737	-0.428	-2.1	0.059	1.27
0.649	-0.935	0.556	0.34	0.452	-1.174	-1.006	0.542	0.612	0.165	-0.857	1.061	1.052	-0.908	-0.017	0.859	-0.038	-1.109	-0.225	0.907	-1.104	-1.026	0.968	0.039	-0.866	0.065	1.117	0.371	-1.529	1.855	1.879	-1.599	0.064	1.539	-0.17	-1.985	-0.312	1.487	-1.958	-1.887	1.521	0.077	-1.547	0.153	1.96
-0.674	-1.066	0.176	0.735	0.126	-1.046	-0.035	0.933	0.875	-0.837	-0.743	0.779	-0.427	-1.278	-0.441	0.478	-0.546	-1.207	0.906	0.784	-0.764	0.397	1.251	0.426	-0.455	0.515	1.22	-1.521	-1.31	1.37	-0.82	-2.148	-0.839	0.782	-0.923	-2.178	1.703	1.338	-1.355	0.663	2.207	0.839	-0.869	0.853	2.151
0.779	-0.898	0.524	-0.453	-0.135	-1.198	-0.286	1.055	0.651	0.819	-0.434	1.072	0.655	-1.253	-0.079	-0.112	-0.76	-1.19	-0.736	0.499	-1.071	-0.638	1.253	0.087	0.104	0.747	1.128	1.286	-0.957	1.811	1.27	-2.123	-0.095	-0.35	-1.311	-2.091	-1.266	0.93	-1.911	-1.204	2.149	0.275	0.17	1.259	2.065
0.341	-0.964	0.758	-0.43	-0.257	-1.181	0.114	1.209	0.387	0.476	-0.447	1.248	0.177	-1.366	0.181	-0.322	-0.941	-1.056	-0.471	0.45	-1.191	-0.158	1.369	-0.281	0.355	0.906	1.013	0.801	-0.877	2.165	0.214	-2.412	0.384	-0.783	-1.698	-1.64	-0.881	0.89	-2.101	-0.137	2.47	-0.48	0.728	1.654	1.756
-0.389	-1.117	0.513	-0.042	0.164	-1.226	0.287	0.975	0.81	-0.243	-0.843	1.143	-0.518	-1.253	-0.157	-0.258	-0.515	-1.26	0.16	0.828	-1.043	0.335	1.38	0.228	0.184	0.457	1.319	-0.276	-1.608	1.907	-0.707	-2.266	-0.4	-0.319	-0.828	-2.275	0.411	1.347	-1.955	0.671	2.44	0.281	0.56	0.861	2.211
-0.379	0.176	1.2	-0.564	-0.897	-0.755	0.983	0.641	-0.444	0.131	0.667	1.233	-0.85	-0.335	1.027	-0.962	-0.992	-0.174	-0.087	-0.72	-1.243	0.883	0.276	-1.052	0.978	0.914	0.212	0.359	1.072	2.258	-1.592	-0.489	1.803	-1.743	-1.632	-0.427	-0.322	-1.148	-2.188	1.493	0.646	-1.83	1.711	1.74	0.381
-0.5	-0.986	0.655	-0.106	0.005	-1.299	0.68	0.912	0.572	-0.223	-0.631	1.203	-0.718	-1.238	0.014	-0.458	-0.602	-1.232	0.272	0.598	-1.229	0.782	1.155	-0.072	0.518	0.554	1.146	-0.389	-1.108	2.192	-1.325	-2.084	0.226	-0.954	-1.062	-2.156	0.412	1.241	-2.071	1.291	2.067	-0.057	0.792	1.11	2.039
-0.597	-0.959	0.598	0.379	-0.107	-1.222	0.238	1.104	0.609	-0.638	-0.511	1.142	-0.486	-1.294	-0.012	0.141	-0.754	-1.157	0.582	0.565	-1.153	0.456	1.31	-0.014	-0.007	0.774	1.16	-1.077	-0.902	2.018	-0.947	-2.353	-0.041	0.174	-1.43	-1.971	0.999	0.919	-2.05	0.843	2.371	0.032	-0.038	1.307	2.047
0.36	-0.536	1.096	0.605	-0.31	-1.093	-1.004	0.787	-0.041	-0.214	-0.226	1.354	0.885	-0.808	0.702	1.042	-0.71	-0.676	0.097	0.128	-1.384	-0.896	0.758	-0.713	-1.006	0.717	0.629	-0.304	-0.21	2.462	1.606	-1.32	1.359	1.941	-1.113	-1.193	0.113	0.042	-2.493	-1.537	1.496	-1.251	-1.726	1.245	1.204
0.901	-0.325	0.877	0.153	-0.268	-1.241	-1.089	0.6	0.354	0.437	-0.079	1.342	1.27	-0.527	0.315	0.714	-0.599	-0.982	-0.437	0.093	-1.354	-1.278	0.612	-0.343	-0.788	0.518	0.998	0.77	-0.094	2.34	2.175	-1.066	0.552	1.28	-1.036	-1.817	-0.626	0.148	-2.399	-2.185	1.12	-0.491	-1.333	0.91	1.839
0.612	1.026	0.39	0.031	-1.091	0.711	-0.634	0.044	-1.147	0.423	1.3	-0.218	0.723	0.632	0.948	0.367	-0.673	1.177	-0.301	-1.388	0.166	-0.808	-0.653	-0.973	-0.383	0.731	-1.208	0.78	2.305	-0.331	1.373	1.161	1.717	0.703	-1.238	2.081	-0.697	-2.395	0.283	-1.563	-1.061	-1.572	-0.615	1.278	-2.07
-1.024	0.744	0.076	1.023	0.234	0.742	-0.041	-1.072	-0.711	-1.299	0.283	-0.326	-0.638	1.107	0.484	0.649	0.81	0.903	1.276	-0.388	0.514	0.629	-1.165	-0.489	-0.717	-0.868	-0.833	-2.257	0.578	-0.662	-1.119	2.094	0.745	1.15	1.454	1.584	2.333	-0.45	0.685	1.171	-1.971	-1.017	-1.18	-1.483	-1.59
-0.805	1.009	-0.264	0.855	0.138	0.954	-0.136	-1.11	-0.603	-1.106	0.557	-0.698	-0.427	1.358	0.217	0.633	0.802	0.972	0.962	-0.53	0.849	0.407	-1.318	-0.196	-0.673	-0.782	-0.937	-1.876	0.842	-1.4	-0.638	2.41	0.324	1.245	1.368	1.61	1.82	-1.055	1.328	0.765	-2.298	-0.358	-1.113	-1.354	-1.711
-0.291	1.262	-0.015	-0.15	-0.709	1.081	0.447	-0.529	-1.073	-0.042	1.254	-0.681	-0.502	1.132	0.653	-0.344	-0.109	1.358	0.072	-1.222	0.68	0.392	-1.118	-0.696	0.44	0.12	-1.331	-0.131	2.17	-1.24	-0.895	1.986	1.181	-0.706	-0.26	2.408	0.082	-2.189	1.222	0.76	-1.97	-1.195	0.876	0.205	-2.361
-1.039	0.32	0.671	1.076	-0.25	0.624	-0.036	-0.027	-1.274	-1.319	0.373	0.009	-0.639	0.227	1.261	0.69	-0.125	1.208	1.34	-0.349	-0.03	0.648	-0.209	-1.198	-0.717	0.183	-1.2	-2.343	0.653	0.032	-1.152	0.465	2.164	1.29	-0.21	2.137	2.322	-0.603	-0.044	1.064	-0.601	-2.116	-1.183	0.194	-2.222
-0.943	0.172	0.846	0.784	-1.019	0.066	0.162	0.855	-0.911	-1.092	0.756	0.468	-0.705	-0.44	1.112	0.371	-1.189	0.609	1.115	-0.732	-0.49	0.667	0.406	-1.135	-0.35	1.217	-0.561	-1.78	1.374	0.943	-1.159	-0.693	2.087	0.616	-2.045	1.138	1.918	-1.374	-0.849	1.025	0.699	-2.118	-0.625	2.022	-1.204
-0.84	0.119	0.982	0.27	-1.141	-0.45	0.548	1.036	-0.533	-0.737	0.793	0.899	-0.847	-0.57	0.964	-0.138	-1.407	0.055	0.634	-0.742	-0.904	0.837	0.598	-0.983	0.199	1.361	-0.034	-1.335	1.413	1.493	-1.492	-0.994	1.67	-0.265	-2.507	-0.008	1.338	-1.367	-1.506	1.53	0.999	-1.671	0.276	2.423	0.024
-1.221	0.397	0.289	0.265	-1.233	-0.011	0.923	0.82	-0.319	-0.983	1.02	0.126	-1.336	-0.275	0.414	-0.422	-1.302	0.156	0.92	-1.023	-0.176	1.324	0.255	-0.363	0.418	1.288	-0.254	-1.568	1.965	0.247	-2.342	-0.579	0.769	-0.695	-2.281	0.396	1.592	-1.856	-0.437	2.353	0.435	-0.579	0.739	2.353	-0.3
-1.203	0.253	-0.352	0.213	-0.573	1.125	0.975	0.28	-0.802	-0.889	0.552	-0.916	-1.384	-0.086	0.25	-0.499	-0.523	1.18	0.901	-0.558	0.938	1.334	-0.059	-0.319	0.5	0.578	-1.202	-1.514	1.006	-1.67	-2.48	-0.036	0.516	-0.864	-0.946	2.159	1.57	-0.976	1.663	2.422	0.004	-0.538	0.903	1.043	-2.061
-0.319	-0.139	-1.232	-0.929	0.199	0.912	1.213	-0.064	0.358	0.357	-0.242	-1.308	-0.966	-0.034	-1.007	-1.355	0.19	0.317	-0.409	0.191	1.408	0.944	0.034	1.019	1.347	-0.148	-0.339	0.622	-0.445	-2.332	-1.595	0.141	-1.899	-2.365	0.405	0.521	-0.598	0.2	2.474	1.621	-0.019	1.779	2.397	-0.273	-0.632
-0.142	0.121	-1.229	-0.93	0.388	0.801	1.042	-0.548	0.462	0.509	-0.197	-1.245	-0.778	0.417	-1.069	-1.237	0.619	0.193	-0.528	0.098	1.324	0.753	-0.469	1.087	1.21	-0.561	-0.209	0.92	-0.157	-2.227	-1.378	0.665	-1.95	-2.161	1.16	0.307	-0.823	0.315	2.306	1.341	-0.894	1.89	2.171	-0.996	-0.405
-0.686	1.056	-0.067	0.269	-0.546	1.129	0.309	-0.638	-1.091	-0.707	0.928	-0.765	-0.611	1.047	0.631	-0.082	0.028	1.412	0.569	-1.081	0.713	0.602	-1.125	-0.645	-0.027	-0.1	-1.413	-1.038	1.832	-1.286	-0.964	1.903	1.168	-0.017	0.168	2.499	1.157	-1.724	1.352	1.175	-1.845	-1.187	-0.056	-0.031	-2.478
-1.129	0.554	0.307	1.091	0.418	0.55	0.056	-0.945	-0.84	-1.405	0.085	-0.149	-0.724	0.966	0.731	0.667	0.851	0.911	1.391	-0.061	0.131	0.775	-0.899	-0.697	-0.661	-0.876	-0.888	-2.464	0.094	-0.263	-1.334	1.698	1.242	1.192	1.582	1.502	2.467	-0.182	0.288	1.27	-1.66	-1.271	-1.173	-1.599	-1.538
-0.753	1.013	0.326	0.741	-0.473	0.896	0.033	-0.526	-1.18	-0.94	0.941	-0.349	-0.461	0.985	0.979	0.441	0.008	1.34	0.951	-0.9	0.364	0.501	-0.962	-0.891	-0.444	-0.037	-1.341	-1.805	1.552	-0.671	-0.95	1.667	1.593	0.82	-0.045	2.297	1.731	-1.54	0.556	0.955	-1.666	-1.564	-0.801	-0.003	-2.311
-0.021	0.872	-0.976	0.395	0.32	1.16	-0.287	-1.208	-0.25	-0.148	0.334	-1.413	0.119	1.306	-0.435	0.416	0.972	0.858	0.347	-0.373	1.311	-0.18	-1.262	0.425	-0.349	-1.013	-0.901	-0.37	0.591	-2.462	0.172	2.388	-0.72	0.656	1.654	1.701	0.443	-0.516	2.415	-0.473	-2.236	0.737	-0.633	-1.843	-1.517
-0.015	0.191	-1.275	0.804	0.655	0.717	-0.8	-0.869	0.53	-0.587	-0.25	-1.267	0.558	0.608	-1.139	0.987	0.958	0.099	0.523	0.279	1.245	-0.46	-0.704	1.126	-1.047	-0.946	-0.133	-1.015	-0.448	-2.271	0.963	1.121	-2.012	1.843	1.633	0.311	0.941	0.542	2.187	-0.817	-1.164	2.026	-1.889	-1.629	-0.174
0.428	0.218	-1.2	0.454	0.676	0.982	-0.883	-0.929	0.212	0.008	-0.36	-1.367	0.792	0.781	-0.897	0.8	1.011	0.48	0.059	0.247	1.373	-0.829	-0.721	0.915	-0.835	-1.042	-0.518	0.146	-0.711	-2.384	1.371	1.318	-1.624	1.279	1.922	0.883	0.197	0.541	2.402	-1.544	-1.109	1.604	-1.445	-1.876	-0.869
0.488	-0.732	-0.921	0.762	0.858	0.593	-1.235	-0.134	0.35	-0.171	-0.966	-0.979	1.096	-0.415	-0.748	1.244	0.611	0.155	0.203	1.002	0.971	-1.07	0.378	0.835	-1.266	-0.631	-0.182	-0.223	-1.755	-1.689	1.809	-0.707	-1.528	2.154	1.096	0.239	0.287	1.84	1.657	-1.878	0.677	1.506	-2.187	-1.13	-0.236
0.734	-0.242	-1.012	0.428	0.795	0.923	-1.18	-0.547	0.076	0.185	-0.636	-1.236	1.197	0.169	-0.666	0.968	0.847	0.518	-0.163	0.668	1.211	-1.223	-0.183	0.704	-1.007	-0.849	-0.563	0.399	-1.065	-2.219	2.096	0.379	-1.26	1.765	1.389	1.045	-0.311	1.108	2.198	-2.134	-0.353	1.288	-1.772	-1.474	-1.02
0.977	0.733	0.264	-1.028	-0.019	0.742	0.082	-0.827	-1	1.301	0.428	-0.264	0.547	0.941	0.754	-0.689	0.506	1.037	-1.243	-0.567	0.367	-0.564	-1.043	-0.81	0.722	-0.534	-1.071	2.291	0.877	-0.42	0.917	1.743	1.388	-1.326	1.072	1.731	-2.195	-0.842	0.704	-0.982	-1.747	-1.406	1.222	-0.835	-2.01
0.138	1.233	-0.152	-1.11	-0.452	0.445	0.984	-0.799	-0.251	0.786	1.059	-0.372	-0.523	1.268	0.092	-1.316	0.222	0.532	-0.768	-1.083	0.32	0.549	-1.297	-0.084	1.301	-0.212	-0.39	1.35	1.883	-0.715	-0.909	2.226	0.119	-2.354	0.438	0.868	-1.493	-1.846	0.463	1.008	-2.247	-0.151	2.369	-0.411	-0.682
0.363	1.009	-0.717	-1.12	0.028	0.622	0.814	-1.011	0.161	0.961	0.652	-0.79	-0.273	1.263	-0.543	-1.22	0.663	0.309	-0.891	-0.619	0.858	0.336	-1.233	0.625	1.221	-0.663	-0.305	1.698	1.029	-1.556	-0.532	2.212	-1.086	-2.066	1.198	0.677	-1.712	-0.994	1.47	0.446	-2.28	0.95	2.032	-1.229	-0.607
-0.245	1.08	-0.655	-0.911	-0.586	0.728	1.129	-0.485	-0.03	0.401	1.05	-0.875	-0.869	0.993	-0.372	-1.311	-0.049	0.537	-0.407	-1.063	0.84	0.858	-0.958	0.437	1.263	0.049	-0.467	0.821	1.832	-1.426	-1.577	1.726	-0.652	-2.314	-0.07	0.903	-0.758	-1.808	1.484	1.644	-1.693	0.637	2.248	-0.009	-1.048
-0.588	0.6	-0.94	-0.451	0.114	1.213	1.087	-0.693	-0.255	-0.051	0.36	-1.346	-1.058	0.775	-0.425	-0.925	0.56	0.957	0.083	-0.342	1.334	1.102	-0.779	0.448	0.962	-0.526	-0.924	-0.147	0.559	-2.428	-1.84	1.394	-0.74	-1.648	0.974	1.693	0.033	-0.63	2.349	1.856	-1.401	0.696	1.633	-0.944	-1.614
-0.428	0.879	0.802	-0.547	-1.154	-0.142	1.089	0.251	-0.612	0.131	1.258	0.661	-0.916	0.401	0.86	-0.976	-0.928	0.353	-0.027	-1.26	-0.62	0.978	-0.418	-0.861	1.08	0.89	-0.278	0.018	2.25	1.012	-1.721	0.697	1.582	-1.895	-1.536	0.607	-0.281	-2.209	-1.089	1.74	-0.708	-1.614	1.871	1.563	-0.612
1.146	0.439	0.417	-0.933	-0.205	0.864	-0.228	-0.32	-1.261	1.316	0.366	-0.258	0.848	0.451	1.059	-0.45	0.007	1.341	-1.315	-0.411	0.288	-0.904	-0.473	-1.056	0.467	-0.143	-1.326	2.273	0.822	-0.576	1.537	0.785	1.815	-0.787	0.184	2.357	-2.29	-0.67	0.533	-1.512	-0.751	-1.873	0.817	-0.166	-2.305
1.304	0.201	0.149	-0.828	0.29	0.938	-0.403	-0.516	-1.09	1.376	-0.021	-0.517	1.101	0.382	0.794	-0.22	0.464	1.266	-1.336	0.087	0.509	-1.015	-0.448	-0.748	0.267	-0.524	-1.312	2.347	0.14	-0.953	1.832	0.749	1.491	-0.506	0.785	2.279	-2.341	0.131	0.801	-1.843	-0.915	-1.221	0.338	-0.829	-2.388
0.942	0.51	-0.712	-0.525	0.695	0.916	-0.441	-1.162	-0.251	0.908	-0.077	-1.042	0.856	1.053	-0.312	-0.109	1.171	0.68	-0.884	0.151	1.039	-0.852	-1.032	0.285	0.026	-1.165	-0.76	1.774	-0.301	-1.707	1.545	1.838	-0.551	-0.156	2.01	1.36	-1.559	0.187	1.827	-1.561	-1.753	0.557	0.013	-2.08	-1.376
0.425	1.125	-0.414	0.045	-0.285	1.275	-0.506	-0.827	-0.826	0.197	0.895	-1.051	0.61	1.225	0.274	0.312	0.346	1.32	-0.224	-0.884	1.089	-0.63	-1.225	-0.244	-0.349	-0.329	-1.303	0.336	1.6	-1.867	1.043	2.187	0.446	0.615	0.618	2.339	-0.502	-1.577	1.894	-0.829	-2.225	-0.549	-0.578	-0.632	-2.346
0.278	1.275	-0.033	-0.76	-0.499	0.942	0.443	-0.759	-0.906	0.619	1.109	-0.637	-0.097	1.301	0.572	-0.723	0.191	1.189	-0.716	-1.125	0.598	0.082	-1.259	-0.537	0.743	-0.176	-1.176	1.113	1.969	-1.105	-0.146	2.254	1.043	-1.214	0.269	2.129	-1.261	-2.035	0.909	0.218	-2.195	-0.978	1.382	-0.301	-2.005
-0.742	1.008	0.256	0.572	-0.648	0.973	0.279	-0.317	-1.211	-0.777	1.015	-0.459	-0.602	0.895	0.944	0.18	-0.192	1.362	0.892	-1.038	0.474	0.654	-0.808	-0.876	-0.09	0.23	-1.404	-1.508	1.737	-0.747	-1.237	1.53	1.577	0.447	-0.356	2.402	1.546	-1.727	0.843	0.904	-1.555	-1.602	-0.411	0.27	-2.515
-0.415	0.896	0.811	0.956	-0.785	0.337	-0.554	-0.153	-1.104	-0.838	1.071	0.268	0.046	0.607	1.279	0.923	-0.425	0.943	0.881	-1.064	-0.306	-0.072	-0.644	-1.161	-0.97	0.356	-0.92	-1.42	1.953	0.272	0.131	1.192	2.243	1.65	-0.721	1.672	1.561	-1.802	-0.569	-0.064	-1.132	-2.154	-1.827	0.608	-1.567
-0.662	0.895	0.67	1.05	-0.52	0.493	-0.369	-0.319	-1.183	-1.081	0.882	0.118	-0.151	0.838	1.146	0.869	-0.119	1.066	1.106	-0.866	-0.137	0.165	-0.76	-1.191	-0.864	0.158	-1.048	-2.009	1.383	0.19	-0.415	1.251	2.061	1.546	-0.272	1.863	2.049	-1.425	-0.184	0.394	-1.272	-2.052	-1.607	0.204	-1.831
-0.819	0.945	0.229	0.967	-0.297	0.897	-0.141	-0.685	-1.062	-1.115	0.745	-0.362	-0.427	1.035	0.8	0.665	0.225	1.292	1.157	-0.803	0.423	0.41	-1.016	-0.812	-0.674	-0.275	-1.191	-1.952	1.353	-0.686	-0.826	1.839	1.372	1.178	0.578	2.176	2.082	-1.356	0.542	0.741	-1.857	-1.437	-1.238	-0.468	-2.119
-0.975	0.837	0.127	0.88	-0.061	0.938	0.17	-0.709	-1.064	-1.162	0.599	-0.507	-0.654	1.008	0.741	0.477	0.419	1.242	1.182	-0.532	0.532	0.705	-0.998	-0.734	-0.369	-0.339	-1.274	-2.14	0.852	-0.837	-1.402	1.608	1.313	0.83	0.706	2.226	2.142	-0.935	0.852	1.174	-1.732	-1.363	-0.784	-0.658	-2.193
-1.038	0.453	0.571	0.607	-1.046	0.454	0.459	0.585	-1.059	-1.057	0.909	0.023	-0.905	-0.063	1.045	0.096	-1.04	0.937	1.049	-0.935	-0.077	0.942	0.089	-1.024	-0.061	1.021	-0.984	-1.829	1.689	0.229	-1.603	-0.065	1.805	0.233	-1.818	1.679	1.787	-1.665	-0.203	1.597	0.066	-1.784	-0.25	1.812	-1.646
-0.992	0.279	0.791	0.757	-0.986	0.268	0.25	0.688	-1.041	-1.101	0.775	0.298	-0.764	-0.242	1.204	0.338	-1.025	0.818	1.083	-0.843	-0.32	0.824	0.268	-1.111	-0.343	1.023	-0.847	-1.966	1.364	0.45	-1.424	-0.495	2.072	0.569	-1.777	1.492	2.057	-1.431	-0.498	1.318	0.464	-2.128	-0.591	1.918	-1.43
-0.368	0.655	1.016	1.223	-0.414	-0.09	-0.855	-0.239	-0.925	-0.978	0.744	0.653	0.281	0.497	1.263	1.298	-0.089	0.511	1.013	-0.688	-0.691	-0.325	-0.626	-1.182	-1.289	0.168	-0.553	-1.677	1.234	1.205	0.475	0.887	2.211	2.233	-0.183	1.018	1.82	-1.239	-1.206	-0.66	-1.031	-2.084	-2.191	0.327	-1.146
-1.051	0.612	0.443	1.159	0.204	0.525	-0.103	-0.777	-0.98	-1.383	0.308	-0.087	-0.601	0.851	0.919	0.823	0.61	0.926	1.363	-0.225	0.063	0.615	-0.885	-0.891	-0.806	-0.568	-0.958	-2.42	0.529	-0.142	-1.071	1.464	1.683	1.408	1.101	1.707	2.472	-0.425	0.061	1	-1.725	-1.542	-1.401	-1.035	-1.737
-0.727	0.601	0.875	1.232	-0.111	0.223	-0.499	-0.542	-1.071	-1.236	0.408	0.387	-0.128	0.719	1.269	1.103	0.297	0.792	1.214	-0.512	-0.36	0.161	-0.776	-1.204	-1.101	-0.259	-0.82	-2.184	0.903	0.717	-0.344	1.191	2.159	2.076	0.512	1.333	2.136	-0.82	-0.742	0.263	-1.276	-2.099	-1.961	-0.387	-1.433
-0.353	0.504	1.115	1.021	-0.824	-0.047	-0.663	0.299	-1.057	-0.872	0.844	0.75	0.209	0.108	1.352	1.139	-0.645	0.637	0.796	-0.912	-0.732	-0.203	-0.153	-1.323	-1.057	0.71	-0.661	-1.54	1.445	1.335	0.318	0.231	2.398	1.848	-1.167	1.222	1.479	-1.563	-1.309	-0.36	-0.179	-2.395	-1.758	1.284	-1.274
-0.74	1.062	0.15	0.699	-0.419	0.976	-0.005	-0.704	-1.092	-0.91	0.957	-0.504	-0.498	1.046	0.796	0.401	0.11	1.318	0.905	-0.919	0.52	0.467	-1.134	-0.796	-0.473	-0.204	-1.253	-1.529	1.64	-1.031	-0.8	1.933	1.414	0.793	0.305	2.365	1.687	-1.496	0.955	0.787	-1.889	-1.486	-0.829	-0.349	-2.299
-1.194	0.046	-0.454	0.363	0.873	0.888	0.832	-0.893	-0.443	-0.988	-0.503	-0.842	-1.264	0.599	-0.022	-0.3	1.074	0.873	0.98	0.579	0.807	1.29	-0.605	0.017	0.285	-1.083	-0.854	-1.749	-0.981	-1.457	-2.259	1.016	0.033	-0.502	1.854	1.604	1.785	1.003	1.314	2.279	-1.082	0.083	0.444	-1.871	-1.556
-0.459	1.18	0.243	0.743	-0.615	0.842	-0.235	-0.541	-1.136	-0.769	1.122	-0.367	-0.092	1.111	0.82	0.697	-0.043	1.219	0.715	-1.116	0.358	0.181	-1.072	-0.91	-0.617	0.055	-1.241	-1.48	1.928	-0.661	-0.121	1.947	1.532	1.07	-0.06	2.223	1.281	-2.021	0.747	0.229	-1.979	-1.482	-1.094	0.127	-2.236
-0.09	1.253	-0.292	0.659	-0.377	1.039	-0.576	-0.869	-0.787	-0.419	1.04	-0.874	0.245	1.328	0.318	0.741	0.332	1.213	0.501	-1.042	0.744	-0.323	-1.343	-0.348	-0.759	-0.296	-1.149	-0.783	1.815	-1.491	0.541	2.341	0.572	1.304	0.541	2.152	0.93	-1.803	1.35	-0.623	-2.331	-0.486	-1.353	-0.581	-2.001
0.391	1.077	0.601	0.153	-1.175	0.516	-0.594	0.107	-1.136	0.168	1.475	0.039	0.559	0.562	1.084	0.4	-0.826	1.057	-0.127	-1.392	-0.082	-0.66	-0.604	-1.131	-0.457	0.805	-1.01	0.49	2.527	0.156	0.936	1.004	1.995	0.849	-1.403	1.864	-0.138	-2.507	-0.144	-1.163	-1.077	-2.014	-0.857	1.436	-1.813
-0.417	1.138	-0.33	1.239	-0.131	0.387	-0.833	-1.022	0.024	-1.064	0.811	-0.368	0.273	1.328	-0.23	1.319	0.554	0.237	1.017	-0.79	0.524	-0.239	-1.388	0.205	-1.33	-0.552	-0.175	-1.702	1.526	-0.761	0.367	2.368	-0.626	2.39	0.872	0.101	1.791	-1.435	0.826	-0.485	-2.446	0.563	-2.335	-0.849	-0.296
-0.148	1.26	-0.035	1.178	-0.506	0.078	-0.982	-0.784	-0.043	-0.813	1.075	-0.073	0.552	1.301	-0.004	1.345	0.178	0.03	0.88	-1.135	0.135	-0.503	-1.312	0	-1.346	-0.178	-0.089	-1.613	1.913	0.079	0.895	2.317	-0.078	2.401	0.348	-0.163	1.524	-2.007	0.201	-0.871	-2.267	0.033	-2.451	-0.234	-0.073
-1.057	0.617	0.334	1.002	0.663	-0.464	0.074	-1.265	0.215	-1.293	-0.027	0.5	-0.692	1.194	0.15	0.606	1.216	-0.38	1.288	0.038	-0.479	0.701	-1.149	-0.092	-0.566	-1.236	0.502	-2.29	-0.058	0.831	-1.362	2.088	0.055	1.084	2.097	-0.769	2.228	0.095	-0.985	1.266	-2.033	-0.153	-0.97	-2.224	0.821
-1.276	0.302	0.076	0.834	0.883	-0.376	0.418	-1.204	0.309	-1.343	-0.371	0.27	-1.075	0.945	-0.135	0.269	1.289	-0.431	1.301	0.373	-0.279	1.074	-0.961	0.165	-0.283	-1.32	0.434	-2.327	-0.721	0.462	-1.824	1.688	-0.111	0.541	2.311	-0.687	2.292	0.692	-0.55	1.914	-1.674	0.192	-0.539	-2.25	0.671
-0.917	0.469	0.823	0.867	0.791	-0.563	0.016	-1.232	-0.282	-1.132	-0.193	0.912	-0.617	1.076	0.635	0.497	1.3	-0.24	1.136	0.204	-0.825	0.552	-1.084	-0.688	-0.516	-1.235	0.154	-1.893	-0.288	1.614	-0.96	1.887	1.208	0.917	2.288	-0.421	2.028	0.24	-1.437	0.947	-1.937	-1.189	-0.958	-2.257	0.277
0.241	0.997	0.742	0.606	-0.111	-1.12	-0.846	-0.896	0.421	-0.201	0.695	1.188	0.664	1.172	0.227	0.973	0.474	-0.944	0.183	-0.684	-1.166	-0.718	-1.164	-0.204	-0.896	-0.519	0.999	-0.356	1.379	1.999	1.081	2.12	0.293	1.595	0.849	-1.712	0.293	-1.224	-2.088	-1.178	-2.135	-0.413	-1.439	-0.962	1.82
-0.874	0.965	0.064	1.111	0.2	-0.61	-0.237	-1.143	0.561	-1.227	0.504	0.432	-0.424	1.314	-0.325	0.824	0.845	-0.719	1.27	-0.461	-0.42	0.383	-1.342	0.326	-0.828	-0.808	0.743	-2.239	0.855	0.701	-0.673	2.403	-0.315	1.49	1.408	-1.389	2.24	-0.817	-0.782	0.703	-2.409	0.443	-1.519	-1.492	1.305
-0.588	1.09	0.002	0.615	-0.411	-1.058	0.033	-0.676	1.122	-0.732	0.977	0.665	-0.366	1.079	-0.652	0.362	0.161	-1.353	0.798	-0.946	-0.645	0.411	-1.115	0.735	-0.33	-0.151	1.405	-1.407	1.681	1.105	-0.693	1.962	-1.221	0.537	0.3	-2.391	1.535	-1.571	-1.13	0.593	-2.081	1.149	-0.706	-0.297	2.332
0.192	-0.583	1.113	-0.87	0.899	-0.075	0.691	-0.338	-1.047	0.662	-0.954	0.749	-0.28	-0.132	1.351	-1.02	0.748	0.601	-0.626	0.941	-0.744	0.306	0.139	-1.378	0.99	-0.796	-0.601	1.008	-1.782	1.367	-0.578	-0.337	2.36	-1.78	1.332	1.086	-1.075	1.75	-1.315	0.553	0.403	-2.414	1.84	-1.31	-1.063
-0.141	-0.777	1.071	-0.618	1.117	-0.095	0.76	-0.377	-0.966	0.312	-1.232	0.757	-0.576	-0.243	1.27	-0.896	0.909	0.547	-0.272	1.194	-0.732	0.521	0.226	-1.288	0.914	-0.944	-0.53	0.504	-2.137	1.249	-0.999	-0.364	2.265	-1.505	1.693	0.964	-0.543	2.093	-1.208	1	0.461	-2.253	1.539	-1.656	-1.043
0.621	-0.65	0.915	-1.005	0.735	0.277	0.375	-0.156	-1.249	0.999	-0.894	0.383	0.168	-0.335	1.332	-0.885	0.516	0.934	-1.011	0.864	-0.421	-0.174	0.22	-1.371	0.881	-0.537	-0.992	1.789	-1.577	0.783	0.34	-0.558	2.405	-1.599	0.986	1.673	-1.778	1.571	-0.623	-0.316	0.582	-2.37	1.585	-0.838	-1.734
1.172	-0.198	0.504	-0.689	0.999	0.396	-0.494	-0.805	-0.898	1.171	-0.753	0.092	1.05	0.381	0.854	-0.098	1.124	0.795	-1.206	0.761	-0.039	-1.047	-0.379	-0.916	0.107	-1.144	-0.782	2.015	-1.396	0.247	1.812	0.713	1.477	-0.201	1.959	1.481	-2.05	1.373	-0.252	-1.873	-0.559	-1.614	0.321	-2.08	-1.343
0.968	-0.576	0.574	0.23	1.055	-0.748	-1.206	-0.53	0.067	0.487	-1.035	0.818	1.336	-0.047	0.256	0.883	0.955	-0.547	-0.447	1.024	-0.888	-1.368	-0.001	-0.367	-0.912	-1.016	0.473	0.913	-1.792	1.484	2.36	-0.187	0.535	1.563	1.742	-0.834	-0.835	1.936	-1.382	-2.374	0.064	-0.573	-1.607	-1.643	1.025
1.242	-0.273	-0.187	-0.67	0.553	-0.923	-0.591	-0.332	1.089	1.196	-0.547	0.449	1.142	0.013	-0.81	-0.063	0.541	-1.256	-1.202	0.5	-0.483	-1.161	-0.049	0.78	0.042	-0.58	1.272	2.151	-0.804	0.826	2.067	0.107	-1.344	-0.125	0.945	-2.243	-2.103	0.949	-0.88	-2.05	-0.058	1.409	0.105	-1.018	2.281
1.227	0.093	-0.4	-0.995	0.218	-0.785	-0.261	-0.355	1.205	1.362	-0.107	0.258	0.952	0.274	-1.014	-0.478	0.329	-1.233	-1.405	0.076	-0.24	-0.921	-0.247	1.026	0.42	-0.429	1.249	2.455	-0.229	0.461	1.669	0.65	-1.788	-0.864	0.696	-2.216	-2.409	0.103	-0.508	-1.547	-0.262	1.871	0.766	-0.854	2.135
1.243	0.079	-0.456	-0.991	0.355	-0.777	-0.222	-0.294	1.239	1.446	-0.057	0.232	0.91	0.229	-1.089	-0.466	0.464	-1.282	-1.4	0.225	-0.187	-0.921	-0.21	1.068	0.502	-0.318	1.273	2.529	-0.2	0.383	1.509	0.183	-1.951	-0.867	0.695	-2.244	-2.496	0.275	-0.314	-1.612	-0.631	1.838	0.865	-0.655	2.273
1.09	0.118	0.621	-0.308	0.854	-0.912	-0.846	-0.94	0.352	0.886	-0.438	1.024	1.159	0.653	0.158	0.317	1.156	-0.796	-0.901	0.468	-0.918	-1.286	-0.616	-0.112	-0.327	-1.148	0.789	1.706	-0.777	1.621	2.076	1.259	0.339	0.616	1.924	-1.485	-1.621	0.779	-1.633	-2.136	-1.227	-0.374	-0.488	-2.033	1.388
-0.023	-1.037	0.769	0.541	1.042	0.384	-0.533	-0.045	-1.201	-0.347	-1.349	0.244	0.312	-0.612	1.199	0.669	0.686	0.984	0.341	1.278	-0.269	-0.333	0.622	-1.275	-0.679	-0.718	-0.995	-0.671	-2.379	0.496	0.485	-1.035	2.176	1.209	1.208	1.732	0.718	2.303	-0.329	-0.534	1.184	-2.152	-1.17	-1.189	-1.811
-0.299	-0.936	0.831	0.791	0.955	0.364	-0.511	0.016	-1.167	-0.661	-1.218	0.292	0.091	-0.543	1.279	0.782	0.623	0.993	0.71	1.185	-0.299	-0.11	0.602	-1.233	-0.859	-0.563	-0.964	-1.192	-2.08	0.563	0.257	-1.094	2.196	1.424	1.072	1.715	1.218	2.055	-0.576	-0.239	1.023	-2.244	-1.421	-1.061	-1.722
-0.554	-0.297	1.146	0.265	1.25	-0.264	0.194	-0.898	-0.882	-0.542	-0.973	0.882	-0.523	0.425	1.277	0.051	1.359	0.402	0.436	1.007	-0.891	0.369	-0.314	-1.268	-0.014	-1.374	-0.399	-0.89	-1.784	1.51	-0.72	0.637	2.374	0.143	2.405	0.617	0.905	1.69	-1.598	0.724	-0.656	-2.189	0.062	-2.422	-0.717
-0.935	-0.864	0.33	-0.231	1.243	0.212	1.121	-0.39	-0.509	-0.459	-1.315	0.079	-1.313	-0.317	0.559	-0.863	0.994	0.416	0.417	1.351	-0.02	1.276	0.313	-0.495	0.836	-1.053	-0.459	-0.738	-2.337	0.004	-2.306	-0.527	0.917	-1.497	1.772	0.818	0.855	2.368	-0.053	2.245	0.519	-0.898	1.546	-1.77	-0.868
-0.576	-0.681	0.887	0.014	1.298	0.111	0.558	-0.57	-1.013	-0.384	-1.221	0.505	-0.708	-0.049	1.165	-0.347	1.18	0.668	0.387	1.28	-0.46	0.736	0.079	-1.137	0.309	-1.156	-0.776	-0.617	-2.245	0.972	-1.242	-0.199	2.042	-0.778	1.987	1.174	0.673	2.225	-0.798	1.226	0.171	-2.108	0.745	-2.052	-1.248
-0.474	-0.007	1.192	0.296	1.091	-0.595	0.163	-1.107	-0.611	-0.508	-0.725	1.143	-0.384	0.707	1.11	0.054	1.384	-0.008	0.5	0.671	-1.122	0.368	-0.688	-1.146	-0.066	-1.403	-0.011	-0.927	-1.209	1.983	-0.692	1.237	1.953	0.176	2.467	0.075	0.861	1.224	-1.973	0.75	-1.201	-2.054	-0.134	-2.464	0.05
0.135	0.362	1.227	0.093	0.854	-0.909	-0.337	-1.213	-0.247	0.057	-0.334	1.36	0.169	1.014	0.96	0.186	1.319	-0.391	-0.021	0.301	-1.306	-0.378	-0.984	-0.898	-0.269	-1.308	0.444	0.161	-0.508	2.433	0.636	1.761	1.617	0.507	2.213	-0.896	-0.06	0.547	-2.356	-0.58	-1.69	-1.657	-0.409	-2.332	0.689
-0.874	-0.902	0.333	0.708	0.54	0.916	0.16	0.337	-1.223	-1.014	-0.903	-0.351	-0.635	-0.808	0.989	0.324	0.126	1.35	1.012	0.886	0.377	0.661	0.775	-0.99	-0.361	-0.134	-1.313	-1.714	-1.629	-0.742	-1.199	-1.281	1.738	0.615	0.251	2.374	1.749	1.638	0.713	1.166	1.322	-1.763	-0.602	-0.24	-2.382
-0.45	-1.193	0.027	0.624	0.484	1.037	-0.167	0.672	-1.055	-0.694	-1.046	-0.601	-0.164	-1.205	0.652	0.517	-0.149	1.299	0.671	1.058	0.66	0.142	1.179	-0.619	-0.457	0.075	-1.366	-1.13	-1.877	-1.123	-0.277	-2.099	1.228	0.78	-0.28	2.366	1.182	1.942	1.083	0.349	2.08	-1.253	-0.92	0.322	-2.325
-0.28	-1.231	-0.369	0.202	0.262	1.265	0.15	0.966	-0.883	-0.3	-0.933	-1.015	-0.222	-1.404	0.318	0.094	-0.431	1.324	0.29	0.937	1.069	0.279	1.382	-0.276	0.03	0.442	-1.388	-0.536	-1.549	-1.882	-0.482	-2.41	0.656	0.027	-0.86	2.303	0.626	1.607	1.857	0.318	2.375	-0.598	-0.123	0.844	-2.368
-0.318	-1.132	-0.503	1.142	0.187	0.453	-0.848	0.953	0.021	-0.955	-0.844	-0.58	0.356	-1.286	-0.372	1.217	-0.479	0.227	0.937	0.832	0.607	-0.33	1.287	0.334	-1.281	0.51	-0.285	-1.634	-1.503	-1.092	0.556	-2.352	-0.546	2.183	-0.864	0.581	1.655	1.49	1.175	-0.501	2.348	0.464	-2.205	0.862	-0.511
-0.449	-0.656	-1.008	1.151	-0.277	0.509	-0.696	0.964	0.467	-1.007	-0.204	-0.99	0.162	-1.038	-0.91	1.155	-0.784	0.056	1.017	0.273	0.896	-0.146	1.02	0.895	-1.168	0.805	-0.024	-1.787	-0.295	-1.733	0.265	-1.848	-1.645	2.03	-1.391	0.142	1.801	0.315	1.642	-0.242	1.717	1.734	-2.082	1.43	-0.064
-0.101	0.359	-1.259	0.726	-1.005	0.3	-0.729	0.605	0.882	-0.544	0.868	-1.025	0.333	-0.198	-1.362	0.859	-1.022	-0.392	0.496	-0.883	0.941	-0.438	0.133	1.313	-0.953	1.007	0.343	-0.822	1.634	-1.71	0.716	-0.337	-2.36	1.638	-1.792	-0.534	0.953	-1.452	1.747	-0.727	0.181	2.383	-1.511	1.863	0.657
0.022	0.38	-1.255	0.409	-1.191	0.331	-0.469	0.761	0.863	-0.28	0.989	-1.048	0.312	-0.287	-1.331	0.574	-1.251	-0.341	0.185	-1.009	0.956	-0.323	0.256	1.278	-0.561	1.184	0.339	-0.484	1.864	-1.703	0.658	-0.403	-2.374	1.089	-2.234	-0.565	0.427	-1.599	1.773	-0.669	0.379	2.255	-0.929	2.11	0.76
-0.465	0.419	-1.15	1.088	-0.745	-0.002	-0.545	0.359	1.116	-0.909	0.812	-0.751	0.062	-0.01	-1.434	1.058	-0.742	-0.702	0.994	-0.672	0.688	-0.047	-0.001	1.448	-0.973	0.689	0.666	-1.874	1.274	-1.16	-0.043	-0.006	-2.52	1.932	-1.172	-1.138	1.719	-1.239	1.247	-0.171	-0.116	2.469	-1.747	1.182	1.186
0.919	-0.859	-0.091	-0.674	0.127	1.079	-0.277	0.742	-1.021	1.022	-0.625	-0.728	0.703	-1.005	0.551	-0.233	-0.366	1.304	-1.049	0.603	0.724	-0.765	1.049	-0.603	0.247	0.368	-1.327	1.758	-1.08	-1.288	1.434	-1.685	1.036	-0.353	-0.708	2.386	-1.783	1.164	1.323	-1.397	1.716	-1.043	0.416	0.569	-2.336
0.965	-0.807	0.265	-1.146	-0.212	0.547	0.207	1.021	-0.782	1.339	-0.353	-0.117	0.483	-1.172	0.615	-0.814	-0.79	0.818	-1.343	0.392	0.224	-0.461	1.168	-0.642	0.857	0.761	-0.828	2.393	-0.655	-0.274	0.827	-2.006	1.18	-1.504	-1.419	1.39	-2.406	0.685	0.329	-0.84	2.036	-1.233	1.469	1.354	-1.463
0.845	-0.861	0.525	-1.151	0.148	0.457	0.377	0.714	-1.002	1.285	-0.627	0.002	0.314	-0.994	0.98	-0.891	-0.298	0.954	-1.269	0.578	-0.094	-0.284	0.969	-0.972	1.012	0.376	-0.919	2.299	-1.055	0.239	0.464	-1.868	1.611	-1.757	-0.505	1.637	-2.246	1	-0.083	-0.627	1.642	-1.746	1.7	0.783	-1.61
1.202	-0.186	-0.37	-0.37	-0.405	1.169	-0.826	0.558	-0.811	1.001	0.148	-0.985	1.26	-0.505	0.284	0.295	-0.663	1.21	-0.995	-0.128	0.995	-1.263	0.498	-0.275	-0.284	0.572	-1.256	1.801	0.324	-1.665	2.303	-0.874	0.466	0.55	-0.999	2.151	-1.771	-0.026	1.761	-2.269	0.688	-0.512	-0.628	0.966	-2.174
0.99	0.553	-0.588	0.127	-0.473	1.184	-1.16	-0.032	-0.585	0.533	0.665	-1.123	1.326	0.386	0.004	0.764	-0.202	1.147	-0.534	-0.68	1.09	-1.352	-0.385	-0.025	-0.839	0.329	-1.068	1.045	1.176	-1.907	2.376	0.588	0.056	1.459	-0.476	2.022	-0.92	-1.233	1.898	-2.394	-0.676	-0.119	-1.464	0.508	-1.975
0.623	0.808	-0.83	0.346	-0.027	1.212	-0.955	-0.738	-0.392	0.188	0.536	-1.281	0.981	1.01	-0.281	0.861	0.43	1.018	-0.204	-0.463	1.269	-1.016	-0.922	0.301	-0.776	-0.49	-1.052	0.319	0.747	-2.309	1.835	1.704	-0.522	1.535	0.677	1.805	-0.415	-0.982	2.241	-1.798	-1.604	0.59	-1.511	-0.642	-1.779
0.794	0.761	0.65	-0.632	-0.948	0.651	-0.261	0.264	-1.242	0.894	1.056	0.031	0.592	0.385	1.211	-0.261	-0.711	1.211	-0.941	-1.074	0.024	-0.717	-0.256	-1.148	0.198	0.784	-1.191	1.683	1.81	-0.078	1.1	0.686	2.055	-0.419	-1.231	2.091	-1.576	-1.974	0.005	-1.128	-0.627	-2.091	0.574	1.151	-2.121
0.614	0.965	0.588	-0.054	-1.139	0.545	-0.527	0.192	-1.2	0.466	1.306	-0.025	0.694	0.521	1.129	0.353	-0.783	1.036	-0.452	-1.364	-0.013	-0.753	-0.528	-1.153	-0.23	0.889	-1.133	0.696	2.326	0.064	1.355	0.825	1.969	0.572	-1.452	1.887	-0.794	-2.393	0.002	-1.368	-0.942	-1.895	-0.539	1.594	-1.867
0.562	-0.11	1.129	-0.736	-0.968	-0.442	0.167	1.096	-0.68	0.804	0.55	0.988	0.255	-0.757	1.146	-0.567	-1.263	0.168	-0.819	-0.56	-1.008	-0.292	0.768	-1.124	0.604	1.302	-0.154	1.423	0.991	1.755	0.47	-1.385	1.97	-1.046	-2.207	0.307	-1.433	-1.078	-1.71	-0.396	1.34	-2.021	0.998	2.298	-0.317
0.172	-0.543	1.165	-1.063	-0.251	-0.657	0.92	0.717	-0.515	0.801	-0.238	1.162	-0.467	-0.794	1.037	-1.241	-0.665	-0.103	-0.769	0.173	-1.135	0.464	0.805	-1.049	1.282	0.538	0.075	1.37	-0.292	2.094	-0.91	-1.43	1.815	-2.258	-1.078	-0.168	-1.243	0.462	-2.047	0.826	1.428	-1.86	2.145	1.091	0.18
0.701	-0.657	0.873	-0.76	-0.638	-0.886	0.07	1.281	0.013	0.944	-0.041	1.079	0.378	-1.204	0.567	-0.505	-1.195	-0.568	-0.932	-0.007	-1.099	-0.335	1.201	-0.539	0.476	1.212	0.558	1.665	-0.034	1.869	0.696	-2.1	1.058	-0.971	-2.108	-1.037	-1.54	-0.046	-1.983	-0.665	2.144	-0.941	0.79	2.177	1.037
0.099	-0.385	1.254	-0.797	-0.571	-0.747	0.796	0.874	-0.502	0.609	0.094	1.252	-0.418	-0.842	1.118	-0.957	-0.952	-0.162	-0.54	-0.129	-1.252	0.509	0.734	-1.12	1.029	0.9	0.177	1.035	0.356	2.203	-0.746	-1.378	1.951	-1.689	-1.689	-0.257	-1.067	-0.181	-2.194	0.601	1.373	-2.038	1.634	1.715	0.322
0.352	0.028	1.237	-1.096	-0.595	-0.361	0.792	0.501	-0.884	0.939	0.359	1.019	-0.251	-0.327	1.308	-1.124	-0.77	0.334	-0.947	-0.358	-1.02	0.307	0.273	-1.314	1.192	0.667	-0.345	1.47	0.789	1.84	-0.572	-0.437	2.392	-2.03	-1.306	0.669	-1.59	-0.624	-1.819	0.516	0.579	-2.381	2.091	1.154	-0.682
-0.342	0.214	1.206	-0.866	-0.426	-0.817	1.171	0.283	-0.439	0.361	0.298	1.28	-1.02	0.126	0.988	-1.289	-0.405	-0.264	-0.347	-0.39	-1.283	0.91	0.133	-1.091	1.3	0.406	0.253	0.711	0.448	2.321	-1.673	0.027	1.813	-2.313	-0.689	-0.398	-0.557	-0.829	-2.263	1.599	0.189	-1.828	2.32	0.685	0.471
0.34	0.218	1.198	-0.911	-0.868	-0.216	0.553	0.675	-0.972	0.71	0.72	0.901	-0.076	-0.306	1.363	-0.89	-0.987	0.474	-0.831	-0.646	-0.88	0.16	0.215	-1.373	0.887	1.064	-0.46	1.247	1.349	1.575	-0.005	-0.65	2.405	-1.617	-1.736	0.802	-1.399	-1.224	-1.544	0.238	0.445	-2.461	1.576	1.756	-0.799
0.402	0.27	1.232	-1.026	-0.749	-0.235	0.68	0.467	-0.983	0.932	0.607	0.93	-0.166	-0.084	1.398	-1.041	-0.77	0.471	-0.896	-0.64	-0.908	0.175	0.122	-1.381	1.13	0.736	-0.476	1.621	1	1.667	-0.368	-0.262	2.411	-1.787	-1.471	0.78	-1.627	-1.06	-1.628	0.198	0.382	-2.414	1.831	1.44	-0.849
-0.019	0.673	1.087	-0.527	-1.168	-0.021	0.516	0.501	-1.088	0.314	1.175	0.716	-0.351	0.091	1.342	-0.692	-1.058	0.662	-0.324	-1.142	-0.711	0.311	-0.097	-1.372	0.671	1.045	-0.687	0.57	2.111	1.208	-0.63	0.188	2.359	-0.997	-1.899	1.238	-0.494	-2.065	-1.204	0.549	-0.312	-2.414	1.074	1.961	-1.137
0.346	1.054	0.586	0.152	-1.108	0.589	-0.54	0.048	-1.166	0.147	1.367	-0.009	0.492	0.624	1.115	0.428	-0.739	1.111	-0.134	-1.359	-0.003	-0.588	-0.64	-1.088	-0.446	0.735	-1.103	0.391	2.419	-0.037	0.924	1.1	2.001	0.717	-1.216	2.027	-0.298	-2.404	-0.008	-0.997	-1.117	-1.98	-0.635	1.23	-2.025
0.539	0.957	0.634	-0.765	-0.835	0.62	0.176	-0.116	-1.247	0.815	1.104	0.023	0.184	0.707	1.18	-0.637	-0.426	1.16	-0.812	-1.147	0.003	-0.264	-0.698	-1.217	0.594	0.472	-1.133	1.528	1.95	-0.021	0.474	1.183	2.07	-1.006	-0.846	2.1	-1.481	-1.981	0.038	-0.417	-1.191	-2.177	1.022	0.873	-2.025
1.109	0.557	0.347	-0.78	-0.519	0.932	-0.315	-0.103	-1.212	1.202	0.627	-0.331	0.895	0.402	0.997	-0.276	-0.25	1.38	-1.196	-0.736	0.386	-0.924	-0.415	-0.968	0.334	0.218	-1.305	2.032	1.244	-0.64	1.632	0.877	1.674	-0.528	-0.362	2.445	-2.072	-1.286	0.593	-1.56	-0.629	-1.874	0.462	0.311	-2.356
1.207	0.341	0.302	-0.818	-0.29	0.965	-0.38	-0.013	-1.214	1.279	0.398	-0.399	0.996	0.259	0.982	-0.275	-0.139	1.433	-1.262	-0.398	0.397	-0.998	-0.198	-0.927	0.28	0.168	-1.361	2.27	0.632	-0.789	1.793	0.352	1.632	-0.504	-0.409	2.432	-2.311	-0.696	0.698	-1.767	-0.422	-1.697	0.498	0.451	-2.403
0.504	-0.306	-1.125	0.736	0.45	0.938	-1.288	-0.127	0.192	-0.168	-0.459	-1.324	1.105	-0.12	-0.796	1.226	0.38	0.478	0.157	0.467	1.295	-1.128	0.101	0.83	-1.306	-0.33	-0.473	-0.12	-0.869	-2.311	1.978	-0.142	-1.481	2.214	0.665	0.839	0.311	0.855	2.255	-1.948	0.12	1.476	-2.322	-0.669	-0.79
0.18	0.235	-1.285	0.99	0.045	0.799	-1.168	-0.242	0.516	-0.533	0.137	-1.3	0.889	0.311	-1.122	1.352	0.133	0.192	0.508	-0.045	1.316	-0.85	-0.238	1.155	-1.362	-0.207	-0.17	-1.051	0.201	-2.252	1.467	0.543	-2.08	2.434	0.346	0.376	0.968	-0.229	2.301	-1.475	-0.451	1.957	-2.346	-0.499	-0.373
-0.484	0.86	-0.829	0.848	0.388	0.901	-0.434	-1.216	-0.022	-0.88	0.319	-1.074	-0.057	1.306	-0.48	0.747	1.002	0.618	0.852	-0.266	1.096	0.045	-1.291	0.505	-0.874	-0.996	-0.546	-1.316	0.591	-1.979	-0.027	2.26	-0.912	1.386	1.754	0.902	1.459	-0.504	1.94	0.028	-2.343	0.87	-1.363	-1.832	-0.942
-0.578	1.131	0.269	1.179	-0.298	0.447	-0.616	-0.885	-0.718	-1.092	0.896	-0.133	-0.005	1.239	0.647	1.079	0.367	0.719	1.144	-0.954	0.121	0.003	-1.281	-0.654	-1.164	-0.391	-0.704	-2.001	1.501	-0.198	0.153	2.255	1.033	1.91	0.828	1.335	2.051	-1.524	0.196	0.038	-2.255	-1.166	-2.115	-0.681	-1.197
-0.617	1.054	-0.296	1.329	0.007	0.004	-0.671	-1.094	0.224	-1.166	0.66	-0.147	0.015	1.323	-0.43	1.262	0.678	-0.217	1.246	-0.669	0.225	-0.021	-1.385	0.231	-1.239	-0.686	0.176	-2.129	1.236	-0.112	-0.097	2.347	-0.657	2.19	1.192	-0.354	2.25	-1.103	0.348	-0.129	-2.417	0.476	-2.181	-1.176	0.461
-0.665	1.036	0.343	1.04	0.124	-0.754	-0.339	-1.146	0.455	-1.083	0.594	0.715	-0.168	1.358	-0.055	0.889	0.8	-0.771	1.086	-0.563	-0.652	0.19	-1.357	0.091	-0.828	-0.799	0.775	-2.012	1.046	1.13	-0.268	2.459	-0.146	1.512	1.458	-1.306	1.826	-1.076	-1.218	0.37	-2.439	0.185	-1.513	-1.481	1.251
-0.25	1.067	0.719	1.049	-0.072	-0.707	-0.814	-1.018	0.026	-0.831	0.717	0.891	0.351	1.295	0.468	1.181	0.568	-0.465	0.8	-0.712	-0.859	-0.361	-1.321	-0.443	-1.173	-0.6	0.498	-1.359	1.243	1.653	0.633	2.357	0.713	2.075	1.008	-0.864	1.423	-1.154	-1.607	-0.619	-2.247	-0.846	-2.119	-1.153	0.859
-0.468	1.164	-0.133	1.212	-0.148	0.352	-0.763	-1.017	-0.281	-1.035	0.836	-0.312	0.157	1.356	0.052	1.229	0.54	0.353	1.056	-0.818	0.297	-0.167	-1.388	-0.078	-1.283	-0.528	-0.459	-1.907	1.487	-0.458	0.293	2.446	0.115	2.232	0.917	0.709	1.859	-1.424	0.632	-0.219	-2.457	-0.11	-2.215	-0.967	-0.742
0.171	1.072	-0.713	0.343	-0.013	1.215	-0.427	-1.068	-0.567	-0.154	0.715	-1.251	0.488	1.296	-0.112	0.462	0.661	1.111	0.214	-0.686	1.176	-0.318	-1.37	0.064	-0.487	-0.638	-1.141	-0.405	1.359	-2.076	0.839	2.363	-0.103	0.683	1.175	2.016	0.121	-1.211	2.111	-0.569	-2.429	0.138	-0.873	-1.236	-1.934
0.31	1.242	0.21	0.76	-0.955	0.43	-1.034	-0.3	-0.728	-0.243	1.401	-0.229	0.842	0.942	0.614	1.156	-0.438	0.719	0.282	-1.37	0.075	-0.896	-0.972	-0.565	-1.056	0.404	-0.821	-0.5	2.447	-0.26	1.368	1.703	1.098	1.917	-0.764	1.437	0.568	-2.357	0.223	-1.6	-1.714	-0.849	-1.838	0.718	-1.441
0.41	0.901	-0.786	0.209	0.079	1.281	-0.589	-1.002	-0.469	0.171	0.513	-1.302	0.632	1.171	-0.176	0.444	0.727	1.149	-0.067	-0.57	1.27	-0.647	-1.222	0.208	-0.46	-0.67	-1.088	0.024	1.084	-2.203	1.011	2.142	-0.485	0.88	1.219	1.995	0.03	-1.055	2.255	-1.075	-2.213	0.333	-0.943	-1.125	-1.956
0.821	0.964	0.04	-0.365	-0.594	1.073	-0.557	-0.287	-1.113	0.641	1.078	-0.636	0.896	0.75	0.711	0.115	-0.216	1.393	-0.824	-0.89	0.632	-0.94	-0.736	-0.742	-0.128	0.21	-1.359	1.234	1.87	-1.127	1.652	1.249	1.267	0.334	-0.47	2.405	-1.325	-1.688	1.176	-1.649	-1.352	-1.255	-0.005	0.194	-2.466
0.893	0.932	-0.239	-0.307	-0.32	1.233	-0.645	-0.572	-0.973	0.726	0.81	-0.915	0.952	0.961	0.463	0.159	0.195	1.389	-0.749	-0.796	0.941	-0.956	-0.92	-0.464	-0.273	-0.155	-1.366	1.4	1.346	-1.643	1.676	1.639	0.843	0.361	0.329	2.404	-1.272	-1.44	1.677	-1.56	-1.66	-0.978	-0.463	-0.31	-2.353
[truncated: 3,626 more rows]
