# Supplementary material for: Machine learning approach for accurate backmapping of coarse-grained models to all-atom models
Source: Royal Society of Chemistry journal article supplement (doi:10.1039/d0cc02651d), 2020-01-01
Supplement: d0cc02651d2.xlsx [file d0cc02651d2.xlsx]

## Sheet: data_hexane
	x_C1_cg	x coordinate of the bead c1 in the coarse-grain(cg) model of hexane
	y_C1_cg	y coordinate of the bead c1 in the coarse-grain(cg) model of hexane
	z_C1_cg	z coordinate of the bead c1 in the coarse-grain(cg) model of hexane
	x_C1_aa	x coordinate of the atom c1 in the all-atom (aa) model of hexane
	y_C1_aa	y coordinate of the atom c1 in the all-atom (aa) model of hexane
	z_C1_aa	z coordinate of the atom c1 in the all-atom (aa) model of hexane
x_C1_cg	y_C1_cg	z_C1_cg	x_C2_cg	y_C2_cg	z_C2_cg	x_C3_cg	y_C3_cg	z_C3_cg	x_C1_aa	y_C1_aa	z_C1_aa	x_C2_aa	y_C2_aa	z_C2_aa	x_H1_aa	y_H1_aa	z_H1_aa	x_H2_aa	y_H2_aa	z_H2_aa	x_H3_aa	y_H3_aa	z_H3_aa	x_H4_aa	y_H4_aa	z_H4_aa	x_H5_aa	y_H5_aa	z_H5_aa	x_C3_aa	y_C3_aa	z_C3_aa	x_C4_aa	y_C4_aa	z_C4_aa	x_C5_aa	y_C5_aa	z_C5_aa	x_H6_aa	y_H6_aa	z_H6_aa	x_H7_aa	y_H7_aa	z_H7_aa	x_H8_aa	y_H8_aa	z_H8_aa	x_C6_aa	y_C6_aa
-1.835	0.159	-1.536	-0.248	-0.743	0.474	2.038	0.537	1.125	-2.376	-0.056	-1.984	-1.225	0.316	-1.007	-2.56	0.754	-2.674	-3.305	-0.202	-1.412	-2.15	-0.978	-2.509	-1.504	1.149	-0.355	-0.468	0.749	-1.69	-0.7	-0.831	-0.182	0.227	-0.517	1.061	1.411	0.359	0.605	0.721	-1.492	1.228	-0.316	-0.165	1.973	1.799	-0.233	-0.25	2.57	0.674
-0.512	-2.16	-0.849	-0.094	-0.072	0.409	0.581	2.241	0.569	-0.997	-2.678	-0.635	0.011	-1.557	-0.997	-0.927	-3.407	-1.503	-1.986	-2.242	-0.612	-0.624	-3.228	0.233	-0.434	-0.915	-1.815	0.961	-2.015	-1.341	0.405	-0.645	0.238	-0.576	0.524	0.556	0.119	1.828	1.084	-1.448	0.244	1.188	-1.03	0.837	-0.38	-0.762	2.464	1.413	0.981	2.561
-0.615	1.982	-1.182	-0.027	-0.379	-0.347	0.666	-1.752	1.359	-0.633	2.694	-1.008	-0.559	1.188	-1.337	-0.813	3.372	-1.787	0.313	3.037	-0.4	-1.442	2.695	-0.24	0.01	0.988	-2.285	-1.611	0.782	-1.413	0.129	0.372	-0.294	-0.165	-1.144	-0.399	0.749	-1.854	0.588	0.105	-1.44	-1.443	-1.285	-1.31	-0.275	0.654	-2.928	0.421	0.542	-1.616
1.12	-2.028	0.359	-0.241	-0.274	-0.342	-0.957	2.266	-0.168	1.449	-1.992	0.991	0.704	-2.01	-0.335	1.753	-0.96	1.211	2.373	-2.594	1.021	0.807	-2.319	1.842	0.292	-3.05	-0.407	1.413	-1.865	-1.142	-0.453	-0.994	-0.46	-0.023	0.467	-0.216	-1.162	1.508	-0.33	0.788	0.5	-0.972	0.266	0.391	0.76	-1.673	1.315	-1.269	-0.7	2.95
0.023	0.582	2.074	-0.509	0.731	-0.236	0.486	-1.108	-1.863	-0.458	0.245	2.527	0.486	0.972	1.512	-1.007	-0.645	1.992	-1.135	0.918	3.159	0.208	-0.309	3.221	1.397	0.415	1.319	0.871	1.889	1.981	-0.25	1.317	0.241	-0.646	0.079	-0.654	0.614	-0.465	-1.355	-1.378	0.48	-1.367	-1.242	-0.758	-0.261	1.178	0.319	-1.892	0.301	-1.676
-1.487	-0.971	-1.678	-0.29	0.215	0.285	1.691	0.869	1.491	-1.487	-1.105	-2.392	-1.422	-0.749	-0.895	-2.368	-1.785	-2.692	-0.634	-1.783	-2.715	-1.511	-0.138	-2.987	-1.22	-1.685	-0.224	-2.479	-0.512	-0.604	-0.377	0.242	-0.47	-0.186	0.189	1.037	0.905	1.002	1.663	-0.038	-0.841	1.506	-1.173	0.568	1.563	0.68	1.996	1.535	2.367	0.701
0.146	-2.476	-0.712	-0.094	-0.016	0.123	-0.101	2.447	0.657	0.267	-2.856	-1.321	0.035	-2.001	-0.078	1.276	-3.011	-1.632	-0.333	-2.378	-2.148	-0.122	-3.854	-1.158	0.761	-2.255	0.707	-0.966	-1.989	0.369	0.1	-0.535	-0.369	-0.297	0.5	0.632	-0.03	1.881	0.081	0.266	0.276	1.555	-1.354	0.447	0.906	0.967	1.921	-0.407	-0.195	2.897
1.416	1.869	-0.258	0.017	0.028	0.03	-1.432	-1.876	0.244	1.585	2.316	0.315	1.202	1.328	-0.832	2.423	1.799	0.919	0.675	2.637	0.963	2.052	3.126	-0.262	2.093	1.144	-1.469	0.375	1.773	-1.41	0.605	-0.015	-0.462	-0.572	0.071	0.519	-1.116	-1.418	0.84	-1.45	0.718	0.15	-0.143	0.431	1.474	-0.388	-2.069	1.371	-1.701	-2.226
-1.467	1.648	-1.081	0.624	0.456	0.049	0.882	-2.074	1.03	-1.573	2.152	-1.603	-1.281	1.089	-0.527	-1	3.067	-1.314	-2.703	2.401	-1.586	-1.197	1.89	-2.59	-1.83	0.172	-0.778	-1.563	1.369	0.491	0.276	0.918	-0.47	0.861	-0.085	0.58	0.475	-1.566	0.53	0.627	0.305	1.47	1.973	-0.033	0.395	-0.566	-1.601	0.928	1.286	-2.468
-1.522	-0.273	-1.929	-0.074	0.408	0.141	1.526	0.025	1.839	-1.742	-0.88	-2.257	-1.242	0.36	-1.511	-2.523	-0.654	-2.982	-2.055	-1.642	-1.572	-0.835	-1.318	-2.793	-2.126	0.955	-1.146	-0.766	0.993	-2.217	-0.362	-0.155	-0.303	0.198	0.964	0.59	0.909	0.532	1.855	-0.632	1.636	0.907	0.949	1.622	0.064	1.204	1.406	2.49	2.063	-0.434
-1.672	-1.608	-0.095	0.227	0.046	0.693	1.579	1.469	-0.534	-2.375	-1.671	-0.125	-0.897	-1.477	-0.057	-2.956	-0.729	-0.382	-2.75	-1.839	0.909	-2.642	-2.513	-0.725	-0.377	-1.568	-1.06	-0.498	-2.208	0.685	-0.501	-0.06	0.456	0.979	0.109	0.832	1.767	0.69	-0.345	1.525	-0.86	1.117	1.117	0.833	1.698	2.826	0.686	-0.14	1.36	2.157
-0.634	-2.482	-0.272	0.073	-0.041	0.028	0.597	2.518	0.247	-0.914	-3.027	0.097	-0.32	-1.837	-0.621	-1.01	-3.86	-0.548	-1.928	-2.795	0.571	-0.278	-3.446	0.878	-0.978	-1.379	-1.403	0.632	-2.126	-1.093	0.017	-0.717	0.343	0.133	0.66	-0.288	0.391	1.845	0.636	-0.781	0.761	-0.877	0.992	0.506	-1.018	-0.392	2.205	1.313	0.781	3.065
-1.79	1.5	0.735	0.023	0.011	0.287	1.77	-1.567	-0.914	-1.903	2.127	0.385	-1.578	0.799	1.087	-1.931	2.057	-0.687	-1.168	2.911	0.726	-2.97	2.408	0.693	-2.242	-0.004	0.732	-1.813	1	2.185	-0.159	0.27	0.979	0.206	-0.282	-0.406	1.49	-1.112	-0.25	0.263	0.648	-1.026	-0.755	-0.831	-0.827	2.292	-0.355	0.028	1.951	-1.951
0.05	1.004	2.458	-0.002	0.087	-0.064	-0.077	-1.033	-2.393	-0.079	0.859	3.161	0.16	1.1	1.65	0.095	1.706	3.845	0.689	0.102	3.524	-1.037	0.401	3.347	1.208	1.466	1.528	-0.486	1.947	1.3	-0.078	-0.076	0.691	0.069	0.258	-0.799	-0.222	-1.101	-1.582	1.081	0.668	-0.987	-0.645	1.004	-1.312	0.589	-1.832	-1.205	0.073	-0.894
-0.711	1.628	1.805	0.006	0.21	-0.365	0.724	-1.749	-1.581	-1.133	1.613	2.436	-0.254	1.567	1.086	-0.864	0.78	3.087	-2.201	1.514	2.177	-1.065	2.525	3.035	0.779	1.776	1.335	-0.625	2.436	0.432	-0.269	0.211	0.339	0.287	0.21	-1.086	0.182	-1.161	-1.765	1.371	0.484	-0.922	-0.317	0.885	-1.711	-0.853	-1.582	-1.805	1.238	-2.227
-1.03	-0.274	-1.993	0.598	0.189	-0.288	0.658	0.121	2.121	-1.761	-0.338	-1.899	-0.21	-0.208	-2.031	-2.191	0.266	-1.116	-2.003	-1.37	-1.555	-2.188	-0.093	-2.857	0.094	0.859	-2.369	0.068	-1.048	-2.734	0.533	-0.45	-0.698	0.649	0.805	0.109	1.076	0.612	1.613	-0.282	1.329	0.157	1.347	1.605	-0.212	2.112	0.318	1.722	0.255	-0.342
-1.147	-1.84	-0.704	-0.443	0.331	0.62	1.493	1.68	0.081	-1.329	-2.51	-0.565	-0.935	-1.077	-0.795	-2.216	-2.585	0.141	-0.486	-3.065	-0.15	-1.619	-3.048	-1.445	-1.719	-0.433	-1.172	-0.06	-1.175	-1.458	-0.417	-0.452	0.564	-0.411	1.118	0.546	0.736	1.791	-0.254	-0.273	1.427	1.608	-1.402	1.609	0.224	0.726	1.306	-1.276	2.138	1.554
-1.396	-0.18	-1.991	-0.36	-0.037	0.155	1.579	0.256	1.875	-1.026	-0.447	-2.581	-1.754	0.083	-1.311	0.025	-0.087	-2.559	-1.56	-0.108	-3.485	-1.075	-1.558	-2.526	-2.788	-0.316	-1.218	-1.717	1.219	-1.227	-1.035	-0.392	-0.001	0.312	0.326	0.317	0.86	-0.035	1.674	0.25	1.439	0.226	1.012	-0.009	-0.513	0.158	0.179	2.436	2.21	0.572
0.314	-0.008	-2.394	0.421	-0.241	0.207	-0.565	0.158	2.294	-0.128	-0.07	-2.929	0.75	0.03	-1.746	0.447	-0.198	-3.848	-0.741	0.824	-3.218	-0.803	-0.879	-2.752	1.065	1.096	-1.65	1.668	-0.608	-1.847	0.035	-0.316	-0.421	0.811	-0.141	0.859	-0.012	-0.383	2.144	1.203	0.881	0.855	1.644	-0.951	0.795	-0.44	-1.364	2.137	-1.047	0.661
-0.516	1.645	1.646	0.096	0.314	-0.195	0.455	-1.819	-1.51	-0.529	1.356	2.319	-0.452	1.899	0.878	0.458	1.29	2.81	-1	0.357	2.485	-1.19	2.048	2.812	-0.021	2.961	0.785	-1.441	1.995	0.461	0.391	0.971	-0.003	-0.21	-0.346	-0.391	0.697	-1.079	-1.334	-1.172	-0.175	-0.918	-0.428	-1.007	0.516	0.629	-0.568	-2.366	0.185	-2.46
-1.998	-0.066	-1.188	-0.03	-0.816	0.413	2.042	0.735	0.874	-2.474	-0.33	-1.649	-1.427	0.152	-0.675	-3.368	0.346	-1.702	-2.944	-1.265	-1.235	-2.066	-0.479	-2.628	-1.926	0.641	0.206	-0.818	0.991	-1.204	-0.536	-0.979	-0.184	0.481	-0.537	0.969	1.619	0.244	0.375	0.84	-1.505	1.415	-0.141	0.087	1.681	2.264	-0.328	-0.295	2.377	1.141
0.013	-2.158	0.706	-0.399	-0.031	-0.05	0.257	2.146	-0.671	0.516	-2.261	1.22	-0.52	-1.984	0.119	0.447	-3.276	1.613	0.43	-1.576	2.116	1.494	-2.082	0.752	-1.487	-2.028	0.621	-0.461	-2.684	-0.698	-0.321	-0.63	-0.54	-0.447	0.557	0.446	0.427	1.762	0.044	-0.068	0.286	1.482	-1.491	0.862	0.529	0.469	2.433	0.981	0.039	2.446
-0.908	2.065	-1.089	0.02	-0.201	-0.211	0.92	-1.951	1.234	-0.863	2.752	-1.005	-0.902	1.299	-1.091	-0.734	3.073	-2.11	-0.069	3.114	-0.386	-1.826	3.172	-0.715	-0.597	1.116	-2.141	-1.922	0.791	-1.061	0.026	0.571	-0.117	0.013	-0.97	-0.305	1.098	-1.806	0.442	0.302	-1.079	-1.426	-1.034	-1.381	-0.164	1.22	-2.796	-0.046	0.711	-2.056
0.827	-2.106	0.367	-0.371	-0.286	-0.108	-0.634	2.268	-0.346	1.353	-2.074	0.894	0.206	-2.083	-0.184	2.035	-1.251	0.534	1.991	-3.004	1.054	0.959	-1.774	1.848	-0.377	-3.046	-0.067	0.671	-2.103	-1.241	-0.728	-0.967	-0.108	-0.021	0.387	-0.126	-1.001	1.528	-0.319	0.802	0.5	-0.855	0.469	0.548	0.871	-1.635	1.318	-1.243	-0.244	2.909
-0.696	1.002	1.561	-0.367	0.673	-0.831	1.134	-1.463	-0.894	-1.133	0.55	1.929	-0.234	1.472	1.072	-0.979	0.86	2.976	-0.889	-0.543	1.751	-2.26	0.708	1.866	0.791	1.28	1.317	-0.451	2.488	1.345	-0.394	1.367	-0.447	-0.218	-0.045	-1.118	1.174	-0.692	-0.912	-0.604	-0.049	-2.162	-1.019	-0.642	-0.607	1.769	-0.367	-1.839	1.023	-2.154
-1.491	-1.796	-0.568	-0.129	0.157	0.117	1.576	1.688	0.484	-1.768	-2.052	-1.173	-1.131	-1.472	0.061	-2.551	-2.824	-1.023	-0.994	-2.452	-1.807	-2.211	-1.213	-1.678	-0.71	-2.227	0.76	-1.968	-1.074	0.613	-0.087	-0.467	-0.306	-0.164	0.769	0.55	0.845	1.869	0.239	-0.073	0.56	1.622	-1.172	1.211	0.348	0.84	2.007	-0.84	2.201	1.466
0.178	-2.011	-1.634	-0.036	-0.022	0.069	-0.172	2.037	1.636	-0.083	-2.271	-2.247	0.423	-1.654	-0.959	0.183	-1.706	-3.225	-1.204	-2.309	-2.213	0.208	-3.296	-2.348	1.524	-1.509	-1.023	0.363	-2.387	-0.102	-0.266	-0.287	-0.645	0.176	0.247	0.797	-0.54	1.518	1.131	1.269	0.407	0.709	-0.032	-0.568	1.466	-0.76	2.031	0.162	0.213	2.46
1.83	1.369	0.114	0.024	-0.029	0.243	-1.823	-1.389	-0.281	1.75	2.056	0.296	1.864	0.585	-0.049	1.348	2.11	1.356	0.956	2.504	-0.282	2.608	2.676	-0.047	2.787	0.235	0.435	1.99	0.486	-1.123	0.74	-0.342	0.47	-0.694	0.268	-0.002	-1.828	-0.719	0.144	-0.563	0.53	-1.12	-0.857	1.172	0.592	-1.989	-0.91	1.23	-1.754	-1.974
-1.89	1.363	-0.063	0.662	0.615	-0.12	1.365	-1.9	0.19	-2.378	1.799	-0.385	-1.274	0.898	0.265	-2.046	2.877	-0.546	-3.331	1.864	0.187	-2.664	1.342	-1.421	-1.721	-0.079	0.076	-1.205	1.154	1.321	0.085	1.018	-0.428	1.15	0.112	0.209	0.856	-1.318	-0.044	1.26	0.415	1.303	2.203	0.289	-0.145	-0.136	-1.517	0.541	1.863	-2.361
-1.498	-0.997	-1.577	-0.206	0.262	0.193	1.658	0.872	1.437	-1.729	-1.665	-1.757	-1.201	-0.286	-1.317	-2.3	-1.601	-2.71	-2.415	-2.13	-0.988	-0.875	-2.248	-1.998	-2.121	0.316	-0.977	-0.567	0.171	-2.161	-0.265	-0.428	-0.084	-0.118	0.975	0.488	0.93	1.223	1.507	-1.177	1.358	0.818	0.131	1.612	-0.364	1.205	2.287	1.623	2.28	0.521
-1.982	-0.749	0.378	0.363	0.549	0.897	1.771	0.179	-1.052	-2.697	-0.677	0.393	-1.169	-0.77	0.391	-3.001	0.272	-0.126	-3.107	-0.619	1.441	-3.187	-1.453	-0.166	-0.999	-0.99	-0.696	-0.801	-1.559	1.112	-0.393	0.556	0.81	1.112	0.429	0.904	1.806	-0.24	-0.34	1.454	-0.095	1.82	1.479	1.45	0.877	2.954	-0.342	-0.144	1.708	0.596
-1.209	-2.031	1.095	-0.011	-0.055	-0.145	1.191	2.07	-1.004	-1.645	-2.147	1.691	-0.752	-1.824	0.454	-1.905	-3.252	1.551	-2.538	-1.539	1.795	-0.971	-2.048	2.523	-1.184	-2.187	-0.469	0.286	-2.218	0.6	-0.472	-0.264	0.44	0.458	0.159	-0.722	0.738	1.675	-0.492	-0.056	-0.13	-1.698	1.426	-0.435	-0.675	-0.163	2.316	-0.484	1.595	2.363
-1.457	1.122	1.537	0.126	-0.284	0.472	1.412	-0.909	-1.825	-1.728	1.73	1.236	-1.084	0.446	1.802	-2.049	1.545	0.183	-1.045	2.569	1.395	-2.662	1.914	1.886	-1.89	-0.344	1.796	-0.861	0.739	2.847	0.178	-0.137	1.212	0.072	-0.428	-0.26	1.36	-0.921	-0.994	-0.308	0.432	-0.798	-0.76	-1.226	-0.458	2.239	-0.378	-0.66	1.404	-0.852
1.02	-0.155	2.344	0.018	-0.101	-0.011	-1.028	0.238	-2.39	0.835	-0.33	3.004	1.154	0.026	1.584	1.765	-0.662	3.508	0.082	-1.184	3.099	0.382	0.564	3.51	1.975	-0.647	1.305	1.511	1.081	1.505	-0.102	-0.192	0.728	0.133	0.011	-0.749	-1.082	0.018	-1.654	0.819	-0.761	-1.191	0.621	0.959	-0.822	-1.608	-0.87	-1.431	-0.915	0.429
-0.829	0.763	2.164	0	0.391	-0.309	0.814	-0.999	-1.957	-1.243	0.49	2.709	-0.407	0.996	1.508	-0.807	-0.433	2.953	-2.278	0.423	2.427	-1.129	1.178	3.545	0.653	1.04	1.901	-0.685	2.091	1.31	-0.425	0.116	0.249	0.434	0.66	-0.849	0.406	-0.274	-2.063	1.505	0.828	-0.539	0.075	1.648	-1.237	-0.662	-0.635	-2.24	1.195	-1.612
0.454	-1.794	-1.418	-0.194	0.186	-0.22	-0.338	1.672	1.502	0.434	-2.467	-1.162	0.476	-1.034	-1.644	-0.531	-2.503	-0.593	1.308	-2.684	-0.499	0.336	-3.189	-1.993	-0.427	-0.746	-2.246	1.558	-0.895	-2.128	0.437	0.108	-0.629	-0.821	0.272	0.186	-0.891	1.623	0.9	-1.011	-0.654	0.761	-1.678	0.189	-0.55	-0.53	2.477	0.243	0.177	1.65
-1.186	-1.333	-1.279	-0.539	0.82	0.193	1.678	0.692	0.993	-1.581	-1.958	-1.3	-0.786	-0.636	-1.202	-2.641	-1.71	-0.955	-1.051	-2.617	-0.503	-1.525	-2.453	-2.292	-1.077	0.054	-2.037	0.302	-0.789	-1.265	-0.973	0.156	0.109	-0.018	1.425	0.201	1.479	1.073	0.319	-0.312	2.02	1.108	-0.148	2.053	-0.683	1.81	0.468	-0.586	1.805	0.339
-1.557	-0.086	-1.774	-0.018	-0.515	-0.063	1.597	0.438	1.808	-1.573	0.555	-2.126	-1.466	-0.768	-1.361	-1.588	1.403	-1.415	-2.541	0.484	-2.671	-0.767	0.671	-2.87	-1.526	-1.616	-2.069	-2.25	-0.887	-0.576	-0.123	-1.02	-0.645	0.105	-0.007	0.516	1.472	-0.073	1.231	-0.757	-0.144	1.201	-0.052	1.055	0.199	1.599	-1.167	1.546	1.644	0.93
0.813	-1.023	-2.019	0.316	0.304	0.128	-0.949	0.84	1.963	0.544	-1.551	-2.391	1.064	-0.434	-1.536	1.206	-1.866	-3.301	-0.47	-1.365	-2.775	0.524	-2.519	-1.805	0.855	0.468	-2.147	2.157	-0.581	-1.383	0.334	-0.407	-0.194	0.312	1.004	0.453	-0.174	1.022	1.852	-0.321	1.688	-0.123	1.427	1.372	0.446	0.426	0.245	2.462	-1.632	0.654
0.08	2.533	0.85	0.035	-0.057	0.046	-0.092	-2.543	-0.913	0.313	3.211	0.724	-0.139	1.745	0.916	-0.059	3.643	-0.211	1.458	3.294	0.781	-0.118	3.805	1.589	-1.193	1.752	0.868	0.152	1.49	1.947	0.348	0.677	-0.088	-0.288	-0.797	0.162	0.383	-1.885	-0.75	-1.387	-0.787	0.038	-0.132	-1.031	1.275	0.431	-1.38	-1.756	-0.56	-3.124
-2.149	-0.428	-0.917	-0.22	0.201	0.857	2.324	0.329	0.184	-2.678	-0.935	-1.024	-1.545	0.097	-0.741	-3.087	-0.677	-1.978	-3.375	-0.835	-0.191	-2.383	-2.034	-1.038	-2.011	1.108	-0.665	-0.794	0.085	-1.532	-0.854	-0.207	0.613	0.44	0.615	0.98	1.56	0.186	0.033	0.778	0.233	1.967	0.315	1.663	0.804	1.553	-0.873	-0.061	2.976	0.495
-0.373	-2.318	-0.069	0.164	-0.13	-0.381	0.201	2.457	0.259	-0.161	-2.656	0.548	-0.573	-1.885	-0.735	-0.05	-3.757	0.328	-0.804	-2.275	1.336	0.856	-2.394	0.889	-1.706	-1.702	-0.727	-0.305	-2.596	-1.582	0.248	-0.595	-0.967	0.062	0.355	0.19	0.407	1.843	-0.216	0.676	0.065	1.051	-0.997	0.165	0.528	1.522	1.802	-0.273	-0.02	2.973
-1	1.87	-1.247	0	-0.395	-0.347	0.998	-1.604	1.441	-0.947	2.559	-1.219	-0.993	1.099	-1.235	-1.701	3.008	-1.91	0.07	2.918	-1.624	-1.249	2.948	-0.163	-0.881	0.621	-2.235	-1.967	0.829	-0.781	0.076	0.384	-0.419	-0.079	-1.169	-0.276	0.941	-1.854	0.674	0.006	-1.691	-1.264	-1.087	-1.392	0.161	0.767	-2.894	0.781	0.996	-1.324
-0.354	-2.076	0.957	-0.407	0.052	0.196	0.565	2.03	-1.126	0.187	-2.231	1.396	-0.943	-1.81	0.475	1.149	-1.992	0.974	0.129	-3.41	1.545	0.216	-1.778	2.431	-1.902	-2.236	0.849	-0.788	-2.302	-0.503	-1.033	-0.249	0.485	0.205	0.339	-0.108	-0.086	1.705	-0.743	0.513	-0.306	-0.952	1.076	0.52	0.593	-0.968	1.704	-1.486	1.189	2.256
-0.006	1.67	1.091	0.18	0.528	-0.916	-0.045	-2.068	-0.307	-0.694	1.789	1.331	0.729	1.51	0.747	-0.457	2.081	2.415	-1.389	0.919	1.367	-1.224	2.647	0.801	1.232	0.735	1.381	1.239	2.468	0.738	0.636	1.136	-0.713	-0.258	-0.118	-0.973	0.069	-1.291	-0.065	0.069	-0.381	-2.043	-1.361	0.077	-0.951	1.139	-1.228	0.162	-0.158	-2.731
-1.703	-1.717	-0.456	-0.233	0.364	0.241	1.796	1.512	0.295	-1.789	-2.245	-0.959	-1.566	-1.111	0.076	-2.31	-3.163	-0.578	-0.714	-2.538	-1.26	-2.248	-1.879	-1.942	-1.482	-1.597	1.067	-2.383	-0.322	0.077	-0.301	-0.321	-0.131	-0.169	1.059	0.598	1.108	1.898	0.233	-0.139	0.915	1.721	-1.025	1.723	0.357	1.176	2.33	-0.854	2.367	1.109
0.304	-2.116	-1.46	-0.104	-0.063	0.069	-0.23	2.154	1.43	0.053	-2.5	-2.033	0.523	-1.652	-0.833	-0.066	-1.863	-2.934	-0.897	-2.998	-1.699	0.798	-3.301	-2.228	1.437	-1.044	-1.128	0.642	-2.319	0.051	-0.498	-0.591	-0.349	0.28	0.456	0.497	-0.634	1.577	1.028	1.045	0.94	-0.132	0.879	0.087	1.353	-1.215	2.153	0.238	0.208	2.652
2.084	-0.162	1.106	0.067	0.009	-0.129	-2.123	0.148	-1.031	2.088	0.032	1.81	1.998	-0.381	0.322	1.641	-0.79	2.462	1.645	1.037	1.951	3.182	0.163	2.138	2.542	-1.401	0.227	2.383	0.494	-0.288	0.503	-0.613	-0.243	-0.363	0.622	-0.003	-1.883	0.459	-0.313	0.071	1.475	-0.693	-0.246	0.983	1.067	-2.303	-0.177	0.481	-2.275	-0.134
-2.105	0.169	0.944	0.528	0.517	0.614	1.691	-0.584	-1.462	-2.701	0.479	1.205	-1.411	-0.1	0.684	-2.499	0.661	2.294	-3.562	-0.191	1.005	-2.881	1.512	0.61	-1.496	-0.536	-0.357	-1.241	-1.095	1.14	-0.174	0.789	0.793	1.181	0.178	0.347	1.204	-0.011	-1.18	1.158	-0.858	0.822	2.029	0.798	0.739	0.21	-0.234	-1.597	2.156	-1.113
-1.428	-0.964	-1.955	0.053	0.019	-0.029	1.404	0.919	1.928	-1.576	-1.576	-2.348	-1.208	-0.335	-1.478	-2.425	-1.324	-3.035	-1.786	-2.432	-1.712	-0.684	-1.96	-2.882	-2.156	0.111	-1.022	-0.946	0.593	-2.116	-0.085	-0.583	-0.437	0.198	0.61	0.364	1.31	0.334	1.364	-0.679	1.016	0.918	0.48	1.464	-0.263	0.916	-0.562	1.937	1.433	1.48
-1.983	-0.791	-0.168	-0.038	1.016	0.149	2.083	0.01	0.13	-2.454	-1.05	-0.623	-1.428	-0.448	0.279	-2.048	-1.481	-1.518	-3.1	-0.264	-0.928	-3.066	-1.829	-0.137	-0.803	-1.276	0.661	-1.901	-0.106	1.183	-0.549	0.741	-0.31	0.505	1.185	0.642	1.722	0.218	0.814	0.056	1.232	1.674	0.895	2.162	0.319	2.425	0.569	1.585	2.372	-0.119
-1.148	-1.722	1.519	0.145	0.17	0.254	1.031	1.578	-1.666	-1.768	-1.875	1.86	-0.474	-1.47	1.144	-1.737	-2.687	2.626	-2.537	-2.278	1.202	-2.185	-0.929	2.285	-0.436	-2.102	0.223	0.521	-1.806	1.666	-0.487	-0.023	0.617	0.762	0.337	-0.131	0.482	1.459	-1.076	1.09	-0.465	-0.761	1.547	0.672	0.59	-0.456	1.297	-1.706	1.547	1.625
-2.223	0.504	0.654	0.047	0.153	0.338	2.167	-0.624	-0.828	-2.627	0.78	0.119	-1.728	0.224	1.212	-2.24	0.438	-0.895	-2.426	1.877	0.103	-3.689	0.534	0.257	-1.84	-0.916	1.347	-2.003	0.652	2.181	-0.269	0.564	0.872	0.36	-0.273	-0.206	1.872	-0.145	-0.255	-0.132	0.05	-1.119	0.168	-1.334	-0.013	2.23	0.895	-0.37	2.366	-1.077
1.582	0.845	1.951	-0.048	0.093	0.008	-1.55	-0.867	-1.98	1.765	0.762	2.668	1.323	0.883	1.151	2.577	1.492	2.906	2.035	-0.303	2.926	0.821	1.071	3.277	2.265	0.575	0.614	1.104	1.945	1.021	0.115	0.012	0.747	-0.229	0.182	-0.732	-1.438	-0.676	-1.185	0.633	-0.232	-1.238	-0.165	1.169	-1.132	-1.308	-1.672	-0.766	-1.574	-0.984
-1.457	0	1.86	0.067	0.501	-0.147	1.407	-0.305	-1.804	-1.939	-0.443	2.114	-0.932	0.463	1.505	-1.612	-1.515	1.945	-2.886	-0.406	1.554	-2.191	-0.201	3.164	0.016	0.344	2.181	-1.137	1.552	1.648	-0.505	0.071	0.116	0.651	0.909	-0.419	1.155	0.469	-1.802	1.402	1.063	0.344	0.321	1.985	-0.486	0.475	0.572	-2.572	1.608	-0.997
0.666	-2.214	0.09	-0.091	-0.072	-0.269	-0.602	2.263	0.088	0.713	-2.476	0.746	0.61	-1.846	-0.616	0.127	-1.946	1.506	1.7	-2.379	1.165	0.499	-3.579	0.713	-0.364	-2.217	-1.074	1.465	-2.21	-1.284	0.551	-0.301	-0.583	-0.743	0.15	0.049	-1.019	1.632	-0.209	-0.666	-0.037	1.153	-1.61	-0.347	-0.478	-1.042	1.643	-1.294	-0.176	2.789
0.1	-2.123	0.434	-0.979	0.256	0.091	0.721	1.949	-0.602	0.164	-2.641	0.926	-0.006	-1.497	-0.054	-0.824	-3.029	1.181	0.768	-2.346	1.831	0.568	-3.53	0.393	-0.538	-1.83	-0.994	1.037	-1.17	-0.298	-0.799	-0.347	0.561	-1.026	0.831	-0.448	0.162	1.589	-1.11	-1.75	1.551	0.12	-1.757	0.416	-1.24	0.77	0.755	-1.624	1.179	2.257
-2.108	0.322	-1.036	-0.301	-0.241	0.281	2.258	-0.18	0.851	-2.056	0.593	-1.693	-2.077	-0.012	-0.309	-1.338	1.426	-1.801	-3.064	1.03	-1.837	-1.919	-0.189	-2.498	-2.914	-0.758	-0.218	-2.29	0.843	0.348	-0.856	-0.736	0	0.232	0.254	0.548	1.545	-0.583	0.736	-0.05	0.634	1.568	0.466	1.049	-0.12	1.458	-1.191	1.632	2.839	0.245
0.426	-0.554	-2.196	0.623	-0.184	0.322	-0.833	0.747	1.983	-0.046	-0.793	-2.665	0.917	-0.311	-1.63	0.334	-0.669	-3.673	-1.067	-0.331	-2.424	-0.231	-1.885	-2.657	0.947	0.827	-1.742	1.921	-0.759	-1.634	0.395	-0.691	-0.19	0.828	0.349	0.839	-0.121	0.438	2.044	0.896	1.407	0.331	1.799	0.066	1.179	-0.188	-0.601	2.425	-1.46	1.049
-0.234	2.509	0.79	-0.015	-0.127	0.238	0.28	-2.452	-0.895	0.089	3.19	0.887	-0.529	1.715	0.699	0.768	3.328	0.001	0.744	3.265	1.764	-0.691	4.049	0.822	-1.082	1.765	-0.224	-1.25	1.499	1.515	0.324	0.459	0.62	-0.353	-0.716	-0.132	0.654	-1.872	-0.476	-0.738	-0.27	-1.141	-1.207	-1.13	0.388	1.508	-1.447	-1.04	-0.104	-2.948
-1.601	-1.915	-0.643	0.121	-0.14	0.104	1.546	2.024	0.593	-1.639	-2.442	-1.123	-1.481	-1.328	-0.122	-2.642	-2.846	-1.065	-0.916	-3.298	-0.993	-1.53	-2.108	-2.172	-1.642	-1.522	0.972	-2.248	-0.526	-0.448	-0.055	-0.718	-0.345	0.304	0.441	0.551	1.437	1.336	0.187	0.372	0.245	1.537	-0.566	1.058	0.583	2.281	0.643	0.343	1.598	2.642
0.057	-1.62	1.858	0.267	-0.205	-0.151	-0.236	1.74	-1.793	-0.105	-1.412	2.558	0.248	-1.805	1.053	-0.36	-2.261	3.189	-0.911	-0.616	2.629	0.787	-0.892	2.972	-0.666	-2.144	0.576	1.076	-2.477	1.176	0.766	-0.698	0.109	-0.237	0.3	-0.415	0.3	1.354	-1.34	-0.608	0.813	0.429	-1.104	-0.312	-0.818	0.784	2.105	-0.702	-0.767	2.056
0.38	2.38	0.11	-0.207	-0.127	-0.421	-0.249	-2.325	0.095	0.731	2.835	0.528	0.031	1.799	-0.328	0.158	3.842	0.649	1.737	2.994	0.105	0.857	2.459	1.543	0.168	2.088	-1.414	-1.044	2.028	-0.102	0.3	0.348	-0.092	-0.704	-0.592	-0.767	-0.332	-2.079	-0.654	-0.717	-0.399	-1.832	-1.752	-0.43	-0.426	-1.014	-2.795	-1.214	-0.209	-2.488
1.332	-1.043	1.704	-0.286	-0.44	0.076	-1.148	1.29	-1.788	1.889	-0.608	1.799	0.666	-1.466	1.555	2.586	-0.522	0.844	2.563	-0.94	2.615	1.603	0.411	2.17	0.225	-1.901	2.548	0.981	-2.403	0.979	-0.499	-0.927	0.619	-0.084	0.046	-0.488	-1.215	0.784	-1.167	0.514	-0.57	-1.198	0.588	0.859	-0.052	-2.056	0.118	-1.481	-1	1.703
0.173	1.975	0.621	0.87	0.065	-0.353	-0.765	-1.996	-0.225	-0.309	2.35	0.231	0.735	1.532	0.989	-0.688	3.243	0.732	-1.213	1.721	0.086	0.079	2.598	-0.784	0.2	1.061	1.846	1.543	2.072	1.49	1.322	0.514	0.103	0.36	-0.377	-0.697	-0.18	-1.546	0.111	0.741	-0.85	-1.64	-0.474	0.205	-1.07	0.547	-2.374	0.327	-1.272	-2.363
-1.122	-0.706	-2.165	-0.222	0.035	0.228	1.212	0.732	1.98	-0.969	-0.764	-2.872	-1.225	-0.612	-1.362	-1.826	-1.09	-3.506	-0.179	-1.54	-3.011	-0.668	0.199	-3.31	-1.487	-1.602	-0.943	-2.044	0.083	-1.196	-0.037	-0.066	-0.546	-0.421	0.165	0.976	0.53	1.038	1.729	-0.585	-0.762	1.515	-1.385	0.693	1.115	0.862	1.968	1.217	1.794	0.397
0.739	-1.831	-1.716	-0.059	-0.017	0.033	-0.701	1.848	1.727	0.629	-2.132	-2.391	0.815	-1.449	-0.977	0.809	-1.355	-3.153	-0.409	-2.431	-2.574	1.286	-3.008	-2.568	1.825	-1.087	-0.789	0.575	-2.251	-0.279	-0.124	-0.279	-0.691	0.002	0.234	0.76	-0.915	1.422	1.094	1.041	0.62	0.929	-0.247	-0.63	1.455	-0.946	2.121	0.256	-0.457	2.204
2.001	-0.1	1.294	0.007	0.029	-0.005	-1.982	0.086	-1.236	1.996	-0.214	2.012	1.947	-0.003	0.51	1.556	-1.195	2.16	1.315	0.582	2.481	3.038	-0.112	2.351	2.732	-0.642	0.04	2.077	1.065	0.236	0.599	-0.435	-0.137	-0.585	0.485	0.144	-1.911	0	-0.406	-0.478	1.414	-0.415	-0.669	0.669	1.269	-1.979	-1.073	-0.126	-1.976	0.203
-2.045	-0.515	1.16	0.405	0.612	0.633	1.699	0.014	-1.694	-2.694	-0.432	1.487	-1.291	-0.526	0.81	-3.183	0.479	1.122	-2.577	-0.593	2.653	-3.362	-1.266	1.228	-1.57	-0.683	-0.291	-0.794	-1.36	1.352	-0.308	0.662	0.935	1.066	0.47	0.25	0.973	-0.024	-1.289	1.671	-0.27	0.748	1.62	1.481	0.258	0.684	-1.12	-1.295	2.371	0.09
-1.002	-0.068	-2.391	-0.065	-0.102	0.026	1.041	0.145	2.353	-0.961	-0.367	-3.02	-1.002	0.211	-1.656	-1.658	0.115	-3.669	-1.144	-1.458	-2.993	-0.003	-0.254	-3.562	-2.03	0.218	-1.325	-0.667	1.289	-1.67	-0.084	-0.519	-0.649	-0.05	0.321	0.689	0.914	-0.342	1.693	-1.03	0.416	1.18	0.302	1.356	0.435	0.537	-1.341	2.089	1.12	0.64
-1.937	-0.747	-0.305	-0.067	0.629	0.812	2.012	0.177	-0.28	-2.5	-0.679	-0.688	-1.285	-0.743	0.132	-3.287	-0.074	-0.19	-2.971	-1.691	-0.823	-2.4	-0.328	-1.774	-0.533	-1.281	-0.457	-1.553	-1.235	1.068	-0.754	0.658	0.457	0.64	0.485	1.102	1.696	-0.271	0.342	0.427	-0.079	2.047	1.056	1.499	1.384	2.636	-0.527	0.93	2.232	0.645
-0.595	0.749	2.455	-0.116	0.033	-0.054	0.74	-0.786	-2.401	-0.73	1.292	2.875	-0.446	0.183	1.919	-0.587	1.009	3.897	-1.773	1.724	2.686	-0.04	2.22	2.756	-1.223	-0.621	2.009	0.467	-0.312	2.306	-0.154	0.617	0.438	-0.05	-0.55	-0.525	0.715	-0.198	-1.838	-1.056	-0.955	-0.771	0.505	-1.404	-0.107	0.057	0.645	-2.258	0.751	-1.357
-1.293	0.929	1.849	0.346	0.007	0.335	1.118	-0.908	-2.053	-1.885	1.276	1.619	-0.585	0.564	2.026	-2.457	0.733	0.84	-1.828	2.315	1.281	-2.584	1.202	2.428	-0.883	-0.455	2.417	-0.096	1.059	2.917	0.572	0.391	0.974	0.132	-0.372	-0.297	1.269	-0.546	-1.322	-0.638	0.178	-0.893	-0.381	-1.288	0.018	1.697	0.368	-1.596	0.914	-1.238
1.058	1.602	1.865	-0.084	0.112	-0.071	-0.984	-1.656	-1.768	1.15	1.612	2.605	0.917	1.534	1.083	1.895	2.458	2.748	1.502	0.567	2.804	0.231	1.864	3.08	1.877	1.381	0.521	0.376	2.435	0.683	0.008	0.302	0.686	-0.166	-0.073	-0.82	-1.097	-1.264	-1.103	0.876	-0.253	-1.266	-0.516	0.839	-1.265	-1.041	-1.968	-0.237	-0.829	-1.967
-1.119	-0.637	1.995	-0.008	0.509	-0.018	1.113	0.322	-2.019	-1.392	-1.257	2.213	-0.803	0.027	1.682	-0.699	-2.103	2.038	-2.335	-1.526	1.646	-1.601	-1.299	3.32	0.055	0.414	2.26	-1.512	0.801	1.847	-0.259	-0.15	0.3	0.246	1.173	-0.342	0.668	0.971	-1.829	1.128	1.556	0.207	-0.671	1.895	-0.182	-0.211	1.093	-2.456	1.504	-0.299
1.978	-1.244	0.3	-0.277	-0.35	0.145	-1.809	1.445	-0.396	2.582	-0.858	0.478	1.261	-1.601	0.094	2.404	-0.133	1.317	2.89	-0.271	-0.357	3.408	-1.607	0.668	1.014	-2.246	0.985	1.522	-2.299	-0.767	0.087	-0.763	-0.405	-0.647	0.048	0.689	-1.853	0.836	0.128	0.137	0.78	1.096	-0.992	-0.529	1.645	-2.558	0.034	-0.241	-1.691	1.978
-0.47	-1.737	1.053	-0.261	-0.154	-1.072	0.779	1.865	-0.23	-0.95	-2.094	1.458	0.003	-1.3	0.546	-0.334	-2.89	1.994	-1.708	-2.697	0.969	-1.532	-1.389	2.135	0.746	-1.98	0.107	0.554	-0.694	1.298	-0.647	-0.614	-0.601	0.221	0.326	-1.436	1.13	1.251	-0.633	-0.454	0.755	-2.187	0.94	-0.281	-2.013	1.779	0.841	0.077	0.392	2.374
-2.221	-0.751	-0.055	0.064	-0.418	-0.1	2.25	0.99	0.146	-2.654	-0.332	-0.452	-1.656	-1.186	0.346	-2.412	0.739	-0.398	-3.648	-0.45	-0.077	-2.767	-0.685	-1.463	-1.974	-2.213	0.206	-1.864	-0.945	1.403	-0.242	-1.167	-0.091	0.374	0.325	-0.095	1.935	0.253	-0.059	-0.013	0.738	0.914	-0.009	1.035	-0.874	2.243	-0.478	0.693	2.484	1.672
-0.537	-0.764	-2.209	0.388	-0.206	0.111	0.246	0.869	2.174	-1.026	-0.556	-2.652	-0.016	-0.919	-1.648	-0.735	-0.966	-3.641	-0.985	0.444	-2.932	-2.019	-0.976	-2.377	0.955	-1.014	-2.156	-0.27	-1.933	-1.339	0.027	0.038	-0.526	0.72	-0.469	0.748	0.257	0.076	2.078	1.829	-0.347	0.694	0.489	-1.559	0.791	-0.832	-0.322	2.216	0.26	1.582
-0.665	2.362	0.7	0.002	0.018	0.035	0.66	-2.349	-0.758	-0.361	2.914	1.044	-0.926	1.723	0.298	0.019	3.746	0.356	0.497	2.592	1.719	-1.124	3.341	1.649	-1.581	1.975	-0.562	-1.63	1.206	1.027	0.242	0.77	0.021	-0.242	-0.727	0.039	0.838	-1.583	-0.584	-1.204	-0.859	-0.478	-0.398	-1.064	1.081	1.124	-1.238	-1.613	0.444	-3.016
-1.636	-1.464	-1.225	0.054	0.031	-0.097	1.588	1.415	1.333	-1.767	-2.18	-1.395	-1.405	-0.699	-1.011	-2.755	-2.235	-1.903	-1.932	-2.662	-0.445	-0.963	-2.615	-1.982	-2.238	-0.365	-0.355	-1.464	-0.033	-1.977	-0.043	-0.666	-0.378	0.141	0.727	0.216	1.436	0.685	1.015	-0.687	1.125	0.727	0.318	1.406	-0.6	1.432	-0.053	1.873	1.65	2.082
-1.064	-1.875	1.051	0.118	-0.288	-0.185	0.938	2.079	-0.957	-1.107	-1.837	1.738	-0.96	-1.854	0.282	-1.823	-2.54	2.251	-1.406	-0.865	2.065	-0.135	-2.109	2.135	-1.868	-1.603	-0.283	-0.82	-2.96	0.055	0.195	-1.046	-0.325	0.025	0.466	-0.064	0.731	1.328	-1.08	0.418	0.654	0.959	-1.072	0.677	-0.03	1.725	0.772	-1.387	1.084	2.746
-0.295	2.502	0.095	0.154	-0.075	-0.271	0.211	-2.44	0.083	-0.457	3.07	0.553	-0.108	1.843	-0.354	-0.527	4.026	0.058	0.315	3.119	1.341	-1.391	2.779	0.993	0.804	1.95	-0.939	-0.984	1.727	-1.073	-0.148	0.42	0.216	0.45	-0.587	-0.76	0.777	-2.049	-0.331	1.388	-0.017	-0.884	-0.053	-0.562	-1.76	1.104	-2.648	-1.226	-0.345	-2.722
1.822	-0.286	1.538	-0.149	0.139	0.352	-1.789	0.183	-1.736	2.412	-0.342	1.149	1.114	-0.175	1.901	2.446	-1.165	0.436	3.143	-0.812	1.842	2.784	0.604	0.647	1.314	0.436	2.792	0.835	-1.139	2.296	0.044	0.474	1.03	-0.342	-0.214	-0.316	-1.576	0.462	-1.003	-0.536	-1.261	-0.165	0.442	-0.067	-1.078	-2.425	0.324	-0.323	-1.945	-0.12
1.212	1.005	1.377	0.666	0.205	-0.781	-1.659	-1.164	-0.681	0.833	1.565	1.611	1.607	0.417	1.053	1.414	1.941	2.508	-0.153	1.18	1.94	0.686	2.34	0.828	1.211	-0.521	1.48	2.704	0.409	1.203	1.379	0.247	-0.453	-0.079	0.128	-0.978	-0.914	-1.042	-0.38	-0.088	-0.147	-2.038	-0.805	0.993	-0.833	-0.319	-1.985	-0.37	-2.31	-1.212
0.167	-0.127	-2.133	-0.897	0.631	0.286	0.503	-0.385	2.009	0.325	0.108	-2.793	-0.039	-0.317	-1.36	0.709	-0.696	-3.463	1.012	0.961	-2.869	-0.546	0.572	-3.354	0.897	-0.743	-0.876	-0.658	-1.257	-1.459	-0.552	0.821	-0.388	-1.147	0.372	0.988	-0.169	0.11	2.116	-1.839	-0.476	0.843	-1.813	1.156	1.292	0.359	1.095	2.35	1.064	-0.837
0.278	-2.596	0.102	-0.146	0.021	0.007	-0.231	2.58	-0.109	0.047	-3.281	-0.09	0.453	-1.799	0.27	-0.242	-3.277	-1.193	-0.789	-3.698	0.55	0.914	-3.978	0.16	1.48	-1.53	-0.089	0.693	-1.816	1.366	-0.448	-0.613	-0.24	0.15	0.664	0.25	-0.616	1.869	-0.223	1.217	0.719	-0.074	0.184	0.652	1.348	-0.664	1.739	-1.314	0.165	3.173
1.867	0.023	1.459	-0.137	-0.068	0.122	-1.766	0.009	-1.559	1.85	0.111	2.19	1.791	-0.104	0.636	1.989	-0.93	2.737	1.041	0.677	2.615	2.727	0.702	2.487	2.59	-0.801	0.356	2.089	0.917	0.201	0.457	-0.55	0.088	-0.709	0.427	0.142	-1.909	0.089	-0.774	-0.341	1.461	-0.013	-1.175	0.41	1.128	-2.378	-0.81	-0.377	-1.564	-0.064
-1.292	1.068	1.552	0.551	-0.502	0.553	0.824	-0.624	-2.04	-1.415	1.465	2.113	-1.084	0.598	0.95	-0.7	2.306	2.356	-1.212	1.03	3.054	-2.551	1.776	1.99	-1.121	1.293	0.067	-1.87	-0.202	0.773	0.352	0.015	1.076	0.683	-0.934	-0.055	0.745	-0.161	-1.376	-0.156	-1.733	-0.093	1.639	-1.504	0.127	-0.135	0.548	-1.596	0.889	-1.089
-1.2	-1.657	-1.578	0.002	-0.003	0.007	1.209	1.622	1.509	-1.329	-1.851	-2.266	-1.004	-1.39	-0.847	-1.839	-2.853	-2.277	-0.429	-2.01	-2.859	-1.879	-0.978	-2.731	-0.692	-2.215	-0.188	-1.967	-1.083	-0.353	-0.136	-0.196	-0.712	0.135	0.172	0.715	1.014	1.386	0.745	0.734	-0.599	1.365	-0.854	0.419	1.161	1.976	1.207	0.179	1.349	1.78
-1.822	-0.502	-1.021	0.524	0.634	-0.571	1.391	0.023	1.571	-2.17	-0.808	-1.582	-1.368	-0.165	-0.438	-2.058	-0.223	-2.526	-3.28	-0.921	-1.304	-1.817	-1.793	-1.842	-1.425	-0.767	0.426	-1.801	0.839	-0.134	0.098	0.09	-0.914	0.884	1.132	-0.121	0.998	0.68	1.377	0.291	2.041	-0.18	1.89	1.409	-0.504	1.446	1.616	1.871	1.755	-0.576
-2.008	0.625	1.605	0.011	0.043	0.024	1.966	-0.68	-1.614	-2.196	0.779	2.298	-1.73	0.429	0.857	-3.25	0.713	2.512	-1.998	1.878	2.505	-1.616	0.158	2.957	-1.937	1.309	0.246	-2.321	-0.44	0.469	-0.261	0.126	0.757	0.261	-0.049	-0.697	1.669	-0.679	-0.873	0.221	0.891	-1.297	-0.403	-0.784	-1.241	2.312	-0.1	-0.222	2.171	-0.645
-1.515	-0.548	1.685	0.375	-0.062	0.395	1.26	0.58	-1.94	-2.198	-0.413	1.476	-0.74	-0.653	1.865	-2.463	-1.065	0.668	-2.212	0.615	1.123	-2.917	-0.58	2.315	-0.523	-1.682	1.753	-0.55	-0.391	2.917	0.251	0.169	1.108	0.487	-0.294	-0.326	1.116	0.805	-1.18	-0.497	-0.58	-0.799	1.173	-1.162	-0.293	0.362	1.647	-1.224	1.367	0.313
2.065	0.718	1.493	0.073	-0.072	-0.058	-2.064	-0.657	-1.468	2.415	0.594	2.125	1.625	0.782	0.787	3.14	1.398	2.306	3.079	-0.289	2.179	1.801	0.753	3.082	2.176	0.694	-0.105	1.189	1.753	0.876	0.451	-0.208	0.606	-0.296	0.084	-0.703	-1.649	-0.581	-0.753	0.261	-0.246	-1.581	-0.515	1.19	-0.795	-1.671	-1.579	-0.276	-2.358	-0.695
-1.664	0.133	1.763	0.158	0.492	-0.159	1.568	-0.488	-1.689	-2.338	-0.116	1.903	-0.929	0.383	1.531	-2.639	-0.839	1.088	-3.018	0.73	2.051	-2.361	-0.68	2.882	-0.095	-0.027	2.066	-0.914	1.458	1.835	-0.518	0.16	-0.006	0.846	0.806	-0.315	1.353	0.301	-1.65	1.597	0.7	0.475	0.629	1.897	-0.289	0.566	0.6	-2.431	1.735	-1.218
2.212	0.514	-0.432	0.045	-0.48	0.032	-2.259	-0.23	0.415	2.394	1.185	-0.247	1.915	-0.219	-0.635	2.265	1.295	0.859	1.908	2.001	-0.887	3.545	1.298	-0.421	2.266	-0.932	0.081	2.442	-0.361	-1.573	0.378	-0.376	-0.644	-0.279	-0.588	0.712	-1.798	-0.873	0.588	-0.089	0.276	1.353	0.152	-1.464	1.149	-1.953	-1.672	-0.169	-2.622	0.396
-0.492	-2.202	-0.066	-0.74	0.38	-0.445	1.075	1.863	0.351	-0.591	-2.701	0.443	-0.436	-1.608	-0.567	0.039	-3.468	0.005	-1.688	-2.959	0.42	-0.155	-2.542	1.465	-0.772	-1.82	-1.678	0.618	-1.365	-0.626	-0.926	-0.26	-0.018	-0.448	0.965	-0.877	0.973	1.492	-0.379	-1.199	1.751	-0.727	-0.419	0.761	-1.98	1.711	0.657	-0.423	1.079	2.184
-1.995	0.066	-1.342	0.126	-0.188	-0.365	1.937	0.008	1.549	-2.412	0.695	-1.207	-1.471	-0.588	-1.463	-2.021	1.336	-0.34	-3.462	0.416	-0.985	-2.306	1.256	-2.145	-1.577	-0.931	-2.562	-1.875	-1.453	-0.852	0.008	-0.346	-1.125	0.251	-0.044	0.384	1.785	-0.06	0.765	-0.322	-0.796	0.96	-0.264	0.909	0.67	2.25	-1	0.392	2.009	0.061
-0.724	-1.177	-2.062	-0.285	-0.067	0.296	0.954	1.253	1.886	-0.745	-1.096	-2.802	-0.658	-1.19	-1.249	-0.514	-2.127	-3.12	-0.02	-0.256	-3.172	-1.814	-0.85	-3.049	-0.075	-2.038	-0.898	-1.737	-1.419	-0.942	-0.302	0.051	-0.445	-0.26	-0.166	1.064	0.181	1.018	1.907	0.365	-1.102	1.21	-1.344	-0.461	1.276	-0.48	1.812	1.591	1.665	1.413
-0.781	2.117	1.208	0.116	0.05	0.048	0.774	-2.174	-1.227	-0.757	2.85	1.221	-0.741	1.309	1.137	-0.014	3.223	1.916	-1.759	3.094	1.597	-0.65	3.329	0.208	-1.746	0.847	0.852	-0.49	0.987	2.169	0.342	0.75	0.238	-0.084	-0.664	-0.123	1.077	-1.489	-0.824	-1.002	-0.586	-0.743	-0.385	-1.197	0.823	1.621	-0.875	-1.612	0.441	-2.777
-1.077	-0.997	-2.049	0.092	0.035	-0.054	0.962	1.06	2.12	-1.235	-1.649	-2.324	-0.89	-0.315	-1.681	-1.64	-1.487	-3.296	-1.871	-2.216	-1.698	-0.35	-2.217	-2.562	-1.753	0.438	-1.532	-0.107	0.126	-2.279	-0.239	-0.562	-0.33	0.413	0.66	0.234	0.65	0.456	1.704	-0.325	1.438	0.079	1.291	0.847	-0.371	-0.366	0.089	2.04	1.233	1.663
0.821	-1.807	1.188	0.386	0.073	0.064	-1.069	1.728	-1.213	0.276	-2.174	1.431	1.367	-1.337	0.902	0.706	-3.095	1.702	-0.434	-2.364	0.588	-0.207	-1.735	2.329	1.931	-1.807	0.082	2.077	-1.272	1.741	0.975	0.047	0.544	-0.201	0.085	-0.406	-0.522	1.567	-0.654	-1.104	-0.354	0.001	0.181	-0.47	-1.3	-0.841	2.001	0.293	-1.567	1.789
-1.484	1.636	-1.051	0.265	-0.056	-0.214	1.346	-1.614	1.212	-2.058	2.04	-0.879	-0.842	1.15	-1.176	-2.437	2.667	-1.693	-1.836	2.754	-0.064	-2.871	1.338	-0.548	-0.084	1.93	-1.423	-1.013	0.469	-2.103	-0.34	0.335	-0.047	0.882	-0.446	-0.37	1.676	-1.003	0.805	1.557	0.184	-0.942	0.59	-1.292	-1.112	2.641	-1.443	0.31	0.994	-2.16
2.073	0.453	1.13	-0.116	0.023	0.341	-2.01	-0.479	-1.374	2.547	0.812	0.724	1.474	0.069	1.529	2.872	0.457	-0.25	3.465	0.867	1.262	2.322	1.833	0.599	1.461	0.388	2.61	1.728	-0.98	1.507	0.062	0.291	1.051	-0.284	-0.245	-0.376	-1.772	-0.007	-0.764	-0.099	-1.33	-0.233	0.415	0.161	-1.089	-2.459	-0.267	0.126	-2.156	-0.93
1.012	1.379	-1.363	0.443	0.302	0.754	-1.442	-1.555	0.776	1.579	1.134	-1.728	0.383	1.618	-0.875	1.715	1.627	-2.73	1.714	0.046	-1.946	2.558	1.368	-1.225	-0.52	1.246	-1.394	0.341	2.688	-0.983	0.512	1.067	0.615	0.296	-0.461	0.804	-1.144	-0.846	0.486	0.61	-0.775	1.78	0.911	-1.004	0.088	-1.758	-0.027	0.938	-1.629	-2.205
0.508	-0.347	-2.079	-0.643	0.881	0.028	-0.081	-0.385	2.072	1.038	-0.295	-2.599	-0.073	-0.334	-1.487	1.025	-1.229	-3.221	1.991	-0.119	-2.042	0.943	0.628	-3.205	0.204	-1.198	-0.823	-1.027	-0.584	-1.973	-0.176	0.911	-0.565	-1.086	0.746	0.64	-0.476	0.301	1.958	-1.978	0.157	0.449	-1.476	1.764	0.756	0.228	1.136	2.273	0.26	-1.018
-1.145	-2.229	-0.599	-0.056	0.004	0.171	1.174	2.276	0.518	-1.663	-2.495	-0.962	-0.605	-1.849	-0.204	-2.379	-1.798	-1.506	-2.215	-3.17	-0.227	-1.153	-3.147	-1.681	0.34	-2.158	-0.768	-0.572	-2.229	0.814	-0.632	-0.335	-0.194	0.527	0.341	0.543	0.471	1.934	0.559	1.421	0.001	-0.079	0.558	0.061	1.643	-0.048	2.22	-0.403	1.836	2.54
1.882	-0.399	1.41	0.08	0.147	-0.099	-1.918	0.287	-1.369	1.822	-0.455	2.127	1.87	-0.348	0.6	1.292	-1.423	2.434	1.208	0.328	2.678	2.885	-0.432	2.539	2.668	-1.066	0.136	2.212	0.662	0.357	0.558	-0.445	-0.194	-0.388	0.736	-0.005	-1.811	0.553	-0.617	0.114	1.661	-0.419	-0.597	0.95	1.083	-2.391	-0.154	0.051	-1.942	0.038
0.089	1.179	2.068	0.111	-0.852	0.284	-0.21	-0.395	-2.28	0.389	1.403	2.704	-0.205	0.875	1.376	1.512	1.461	2.547	0.06	0.696	3.572	0.027	2.424	2.873	0.108	1.611	0.604	-1.323	0.665	1.408	0.348	-0.5	0.943	-0.155	-1.059	-0.398	-0.014	-0.074	-1.589	-1.228	-1.357	-0.286	0.376	-1.969	-0.743	-0.617	0.871	-1.416	-0.4	-0.744
-1.513	-1.142	-1.765	-0.084	0.187	-0.023	1.571	0.992	1.762	-1.508	-1.575	-2.353	-1.428	-0.649	-1.131	-2.583	-1.822	-2.414	-0.912	-2.486	-2.071	-1.134	-1.121	-3.31	-1.942	-1.238	-0.285	-2.058	0.239	-1.296	-0.102	-0.12	-0.727	-0.081	0.485	0.675	1.464	0.797	0.99	-0.445	-0.261	1.391	-0.589	1.463	0.831	2.13	-0.015	0.649	1.595	1.141
-2.031	-0.094	0.357	0.177	0.257	-0.977	1.941	-0.045	0.539	-2.651	-0.455	0.274	-1.314	0.265	0.397	-3.197	0.011	-0.635	-3.374	-0.352	1.121	-2.484	-1.551	0.085	-0.789	0.045	1.356	-1.485	1.388	0.385	-0.477	-0.099	-0.788	0.82	0.634	-1.016	1.719	0.668	0.23	0.702	1.673	-1.38	1.375	0.09	-1.863	2.621	1.161	-0.268	2.116	-0.727
-1.216	-0.535	2.258	-0.038	0.159	0.036	1.235	0.442	-2.273	-1.1	-0.78	2.939	-1.258	-0.246	1.488	-2.073	-1.27	3.275	-0.868	0.022	3.614	-0.353	-1.553	3.027	-1.96	0.649	1.561	-1.699	-1.046	0.864	0.05	0.184	0.802	-0.127	0.134	-0.726	1.178	0.39	-1.461	-0.836	0.869	-1.132	-0.486	-0.891	-0.955	1.46	1.41	-1.141	1.212	0.477
-1.741	0.121	1.663	0.238	-0.174	0.432	1.597	-0.049	-1.92	-2.258	0.59	1.402	-1.091	-0.364	1.892	-2.678	0.306	0.42	-1.968	1.675	1.469	-3.106	0.535	2.101	-1.478	-1.389	1.721	-1.072	-0.331	2.984	0.274	-0.211	1.202	0.199	-0.145	-0.333	1.529	-0.108	-1.109	-0.39	0.719	-0.647	-0.282	-1.052	-0.723	1.944	0.902	-0.879	1.573	-0.015
2.509	-0.44	0.752	-0.018	0.019	0.08	-2.445	0.412	-0.757	2.977	-0.726	1.229	1.937	-0.158	0.271	3.984	-0.624	0.775	2.673	-1.715	1.501	2.865	-0.071	2.071	2.054	-0.651	-0.723	2.2	0.916	0.167	0.469	-0.226	0.68	-0.481	0.262	-0.503	-1.947	0.3	-0.133	-0.421	-0.407	-1.421	-0.254	1.308	-0.919	-2.262	-0.655	0.325	-2.831	0.522
-0.991	1.87	1.09	-0.031	-0.439	0.292	0.98	-1.62	-1.298	-0.835	2.586	1.049	-1.112	1.042	1.056	-0.891	3.129	0.138	0.181	2.744	1.391	-1.583	3.122	1.744	-2.221	0.909	0.956	-0.875	0.764	2.113	0.013	0.305	0.19	-0.073	-1.171	0.4	0.9	-1.91	-0.535	-1.061	-1.616	0.084	0.173	-1.504	1.396	1.928	-1.714	-0.08	0.997	-1.312
2.255	-0.232	0.016	-0.084	-0.387	0.277	-2.229	0.453	-0.167	2.608	0.399	-0.062	1.797	-0.902	0.081	2.293	1.025	0.726	2.288	0.983	-1	3.72	0.248	-0.12	1.899	-1.308	1.112	2.339	-1.638	-0.488	0.268	-0.878	-0.169	-0.436	0.103	0.722	-2.007	0.155	0.551	0.069	1.102	0.511	-0.218	-0.139	1.774	-2.389	-0.913	0.653	-2.373	0.72
1.29	-0.82	-1.505	-0.939	-0.406	-0.086	-0.536	1.232	1.538	1.659	-1.327	-1.954	0.83	-0.314	-0.998	2.415	-0.894	-2.549	0.98	-1.926	-2.549	2.114	-2.009	-1.207	0.486	0.518	-1.67	1.559	0.212	-0.237	-0.347	-0.872	-0.294	-1.422	0.168	0.127	-0.817	1.391	0.83	-2.204	-0.234	0.754	-1.858	0.357	-0.837	-0.034	2.013	0.262	-0.304	1.006
-2.019	-1.023	-0.761	-0.109	0.319	-0.344	2.102	0.817	0.955	-2.283	-1.469	-0.271	-1.673	-0.496	-1.248	-1.568	-1.984	0.341	-2.925	-2.221	-0.794	-3.002	-0.941	0.391	-2.498	0.058	-1.726	-1.091	-1.008	-2.051	-0.794	0.61	-0.516	0.575	0.024	-0.182	1.386	1.038	0.66	1.141	-0.348	-1.02	0.503	-0.768	0.638	1.504	1.914	-0.033	2.729	0.559
0.08	-2.038	-1.268	-0.223	-0.081	0.38	0.052	2.074	1.044	0.325	-2.217	-1.942	-0.163	-1.759	-0.54	0.306	-3.365	-1.87	1.309	-1.926	-2.287	-0.454	-1.773	-2.656	0.398	-2.231	0.252	-1.19	-2.079	-0.424	-0.034	-0.289	-0.342	-0.421	0.114	1.097	-0.535	1.625	1.303	0.298	-0.243	1.8	-1.439	-0.246	1.328	-1.501	1.904	0.849	0.607	2.415
-0.522	1.648	1.902	0.042	0.066	-0.058	0.521	-1.682	-1.881	-0.668	2.339	2.076	-0.348	0.897	1.636	0.105	2.999	1.761	-0.764	2.418	3.16	-1.658	2.706	1.63	-1.201	0.149	1.841	0.566	0.679	2.21	-0.143	0.771	0.129	0.233	-0.645	-0.241	0.491	-0.872	-1.705	-0.669	-1.248	0.02	1.098	-1.072	0.303	-0.413	-0.494	-2.133	0.538	-2.411
-2.222	-0.484	-1.207	-0.106	0.383	0.027	2.316	0.195	1.197	-2.875	-0.756	-1.126	-1.476	-0.154	-1.223	-3.304	-1.149	-2.117	-3.633	0.041	-0.732	-2.964	-1.601	-0.379	-1.475	0.601	-2.013	-0.851	-1.002	-1.569	-0.881	0.293	0.065	0.688	0.423	-0.003	1.483	0.21	1.284	0.882	1.426	-0.457	0.91	-0.254	-0.743	1.236	0.963	2.061	3.038	0.199
1.106	-1.459	1.468	0.437	0.033	-0.176	-1.352	1.464	-1.402	0.775	-1.522	2.128	1.443	-1.334	0.725	1.216	-2.299	2.777	-0.288	-1.769	1.953	0.753	-0.508	2.612	1.26	-2.253	0.045	2.524	-1.214	0.928	1.183	-0.04	0.029	-0.302	0.12	-0.389	-0.594	1.423	-1.162	-0.926	0.09	0.549	-0.647	-0.809	-0.921	-0.45	2.307	-0.513	-2.04	1.448
-1.05	1.859	-1.177	0.157	-0.263	-0.289	0.97	-1.749	1.346	-1.279	2.509	-1.007	-0.779	1.111	-1.283	-1.876	3.065	-1.791	-0.399	3.177	-0.909	-1.842	2.553	-0.059	-0.093	1.2	-2.123	-1.541	0.461	-1.773	-0.123	0.393	-0.075	0.444	-0.923	-0.499	1.33	-1.661	0.624	1.094	-0.843	-1.408	-0.513	-1.518	-0.806	1.583	-2.587	0.267	0.596	-1.809
1.211	0.734	1.876	-0.215	-0.229	0.326	-1.075	-0.585	-2.108	1.357	1.455	1.817	0.99	-0.039	1.87	1.539	1.833	0.772	2.311	1.54	2.399	0.543	1.948	2.39	0.719	-0.244	2.962	1.832	-0.794	1.639	-0.276	-0.433	1.069	-0.147	-0.042	-0.42	-1.255	-0.594	-1.285	0.866	-0.427	-0.749	-0.073	1.068	-0.535	-1.418	-1.673	-1.047	-0.857	-0.538
1.947	-0.283	0.539	-0.369	0.194	1.02	-1.61	0.215	-1.366	2.146	-0.959	0.36	1.651	0.437	0.768	3.034	-0.88	-0.31	1.378	-1.46	-0.269	2.376	-1.53	1.32	1.694	1.115	-0.103	2.413	0.823	1.466	0.223	0.494	1.388	-0.889	-0.079	0.524	-0.967	0.42	-0.914	-1.871	-0.009	1.113	-0.682	-1.146	0.593	-0.921	1.55	-0.994	-2.215	0.003
0.23	-0.358	-2.407	0.029	0.484	0.11	-0.249	0.049	2.31	0.345	-0.98	-2.793	0.093	0.285	-1.914	0.536	-0.736	-3.866	-0.564	-1.595	-2.736	1.324	-1.415	-2.471	-0.865	0.766	-2.141	0.987	0.941	-2.109	0.127	-0.089	-0.407	-0.057	1.048	0.609	0.235	0.622	2.073	-1.126	1.418	0.588	0.56	1.956	0.387	1.294	0.339	2.271	-0.717	-0.469
-1.781	-1.835	0.227	-0.03	-0.031	-0.054	1.798	1.889	-0.11	-2.459	-2.016	0.016	-1.042	-1.552	0.434	-2.504	-3.06	0.378	-2.624	-1.966	-1.043	-3.304	-1.364	0.39	-0.33	-2.256	-0.024	-0.882	-1.749	1.477	-0.77	-0.194	-0.148	0.71	0.147	0.073	1.021	1.666	-0.212	1.164	-0.451	-0.704	1.08	-0.229	1.096	0.873	1.791	-1.298	2.506	2.013
2.169	0.145	0.801	-0.007	0	0.054	-2.179	-0.181	-0.833	2.32	0.503	1.429	1.915	-0.267	0.135	1.904	0.039	2.326	2.036	1.567	1.228	3.423	0.573	1.561	2.441	-1.196	0.093	2.267	0.371	-0.764	0.453	-0.608	0.23	-0.465	0.607	-0.142	-1.939	0.344	-0.248	-0.12	1.102	-1.129	-0.358	1.313	0.716	-2.41	0.139	0.708	-2.328	-0.675
0.445	1.055	2.137	-0.253	-0.767	0.257	-0.3	-0.341	-2.326	0.901	1.166	2.698	-0.042	0.874	1.506	1.888	0.75	2.542	0.606	0.633	3.71	1.059	2.227	2.761	0.139	1.545	0.684	-1.102	0.956	1.817	0.134	-0.518	0.878	-0.638	-0.87	-0.39	-0.191	-0.029	-1.562	-1.697	-0.826	-0.186	-0.377	-1.866	-0.703	-0.668	0.941	-1.588	-0.428	-0.692
-1.188	-1.257	-1.866	0.127	-0.165	0.085	1.164	1.381	1.826	-1.27	-1.267	-2.596	-1.023	-1.204	-1.057	-2.116	-1.951	-2.803	-0.332	-1.507	-3.207	-1.567	-0.311	-2.99	-0.925	-2.238	-0.653	-1.984	-0.799	-0.621	0.124	-0.303	-0.663	0.135	-0.027	0.836	1.111	1.192	1.087	0.348	-0.923	1.504	-0.87	0.257	0.977	2.079	0.785	0.739	1.183	1.515
-2.038	-0.703	-0.547	0.113	0.843	-0.362	1.977	0.041	0.956	-2.467	-1.039	-1.056	-1.51	-0.308	-0.043	-3.122	-0.284	-1.457	-3.062	-1.854	-0.579	-1.873	-1.542	-1.865	-1.177	-1.02	0.808	-2.135	0.472	0.405	-0.321	0.371	-0.742	0.545	1.225	0.124	1.389	0.58	1.219	-0.15	1.887	0.71	1.255	1.815	-0.589	1.923	1.39	1.782	2.49	-0.432
-1.208	0.375	2.229	0.077	-0.353	0.06	1.144	-0.104	-2.337	-1.069	0.563	2.913	-1.288	0.16	1.467	-2.077	0.853	3.362	-0.351	1.438	2.932	-0.627	-0.321	3.501	-1.78	1.035	0.878	-1.917	-0.804	1.417	0.131	-0.109	0.788	0.023	-0.556	-0.69	1.213	-0.007	-1.553	-0.875	-0.115	-1.158	-0.045	-1.652	-0.788	1.229	1.088	-1.245	1.017	-0.234
-1.472	0.535	1.901	0.187	-0.069	0.244	1.343	-0.468	-2.069	-2.033	0.991	1.729	-0.805	0.064	2.017	-2.478	0.54	0.844	-1.681	2.049	1.468	-2.731	0.87	2.594	-1.224	-0.975	2.209	-0.495	0.35	3.071	0.347	0.156	0.968	0.024	-0.284	-0.494	1.287	-0.038	-1.369	-0.916	0.244	-0.799	-0.138	-1.413	-0.463	1.377	1.072	-1.704	1.319	-0.889
1.941	-1.165	-1.266	-0.012	-0.078	0.064	-1.911	1.209	1.245	2.12	-1.462	-1.906	1.662	-0.823	-0.566	3.083	-1.866	-1.903	2.181	-0.685	-2.704	1.486	-2.286	-2.272	2.343	0.053	-0.437	1.789	-1.573	0.275	0.254	-0.359	-0.59	-0.261	0.203	0.716	-1.731	0.71	0.627	0.436	1.006	0.966	-0.308	-0.554	1.505	-1.817	1.308	-0.308	-1.999	1.646
-0.396	2.322	0.459	-0.376	-0.25	0.313	0.532	-2.164	-0.671	0.031	2.935	0.358	-0.826	1.615	0.545	0.634	2.861	-0.563	0.804	2.916	1.197	-0.584	3.793	0.425	-1.634	1.571	-0.182	-1.163	1.576	1.606	0.054	0.346	0.497	-0.826	-0.856	0.134	-0.026	-2.187	-0.079	-1.28	-0.689	-0.827	-1.526	-1.03	0.991	0.567	-2.345	0.848	0.995	-2.076
2.215	0.431	0.328	0.018	-0.489	0.184	-2.191	-0.17	-0.428	2.3	1.128	0.6	2.049	-0.331	0.026	1.558	1.471	1.431	2.257	1.923	-0.176	3.346	1.066	0.921	2.239	-1.118	0.776	2.64	-0.403	-0.951	0.538	-0.559	-0.376	-0.483	-0.424	0.746	-1.887	-0.672	0.148	-0.469	0.643	1.066	-0.318	-1.136	1.589	-1.861	-1.691	-0.261	-2.408	0.3
2.041	0.734	-0.576	-0.536	0.018	-0.759	-1.649	-0.585	1.25	2.718	0.537	-0.761	1.248	0.883	-0.391	3.206	1.49	-1.041	2.63	-0.174	-1.596	3.42	0.073	-0.002	1.053	1.834	-0.976	1.285	1.025	0.731	0.24	-0.1	-0.838	-1.267	0.214	-0.563	-1.662	0.161	0.947	-1.897	-0.58	-0.975	-1.544	1.117	-1.119	-1.091	0.77	1.616	-1.607	-1.255
-2.134	-1.365	0.251	0.013	0.063	-0.019	2.146	1.329	-0.273	-2.637	-1.541	0.72	-1.547	-1.112	-0.234	-2.165	-2.1	1.572	-3.504	-2.08	0.339	-3.084	-0.615	1.124	-1.973	-0.935	-1.225	-0.941	-2.025	-0.358	-0.69	0.023	0.308	0.714	0.1	-0.361	1.523	1.183	0.17	0.457	0.223	-1.446	1.331	-0.812	-0.084	0.896	2.121	0.215	2.703	1.412
0.87	-2.194	0.609	-0.369	-0.11	-0.33	-0.671	2.295	-0.362	1.546	-2.421	0.83	0.16	-1.878	0.344	1.347	-3.435	1.118	1.986	-1.671	1.637	2.169	-2.505	-0.057	-0.481	-1.83	1.272	-0.259	-2.584	-0.403	0.298	-0.487	-0.35	-1.048	0.287	-0.311	-1.161	1.735	-0.728	-1.303	0.181	0.793	-1.795	-0.32	-0.948	-0.892	1.702	-1.818	-0.209	2.753
0.206	2.109	1.604	-0.101	-0.042	0.055	-0.085	-2.061	-1.624	0.043	2.825	1.683	0.355	1.313	1.44	0.549	3.558	0.98	0.259	3.031	2.782	-1.016	2.953	1.444	-0.068	0.739	2.351	1.477	1.225	1.478	-0.216	0.752	0.123	0.027	-0.833	-0.016	-0.079	-1.252	-1.456	-0.587	-1.469	0.652	1.087	-0.835	0.29	-1.061	-0.965	-1.862	-0.067	-2.786
-2.477	0.687	-0.6	0.053	0.082	-0.146	2.47	-0.721	0.678	-3.081	0.449	-0.945	-1.773	0.889	-0.265	-3.834	1.258	-0.891	-3.457	-0.375	-0.303	-2.786	0.024	-1.986	-1.956	0.981	0.806	-1.547	1.967	-0.513	-0.531	-0.004	-0.631	0.649	0.169	0.346	1.876	-0.766	0.13	0.282	0.031	1.446	1.019	1.172	0.185	1.449	-1.756	0.217	2.975	-0.62
1.41	-0.871	1.618	-0.196	0.286	0.479	-1.278	0.752	-1.928	1.466	-1.609	1.553	1.276	-0.055	1.662	2.371	-1.841	2.11	1.583	-1.991	0.484	0.59	-2.068	1.949	2.044	0.391	1.05	1.399	0.214	2.753	-0.091	0.516	1.21	-0.299	0.078	-0.268	-1.147	1.042	-1.177	-0.573	-1.018	-0.372	0.689	-0.018	-0.726	-2.109	1.08	-0.654	-1.355	0.442
-2.453	0.333	0.066	0.204	0.37	-0.204	2.338	-0.559	0.039	-3.019	0.058	0.434	-1.758	0.585	-0.302	-3.904	0.711	0.139	-2.9	0.215	1.536	-3.314	-0.983	0.214	-1.772	1.692	-0.167	-1.925	0.301	-1.394	-0.386	0.07	0.214	0.789	0.684	-0.62	2.206	0.236	-0.124	0.659	1.741	-0.576	0.774	0.258	-1.671	3.024	0.581	-0.822	2.385	-1.287
0.524	0.838	2.159	-0.303	-0.168	0.236	-0.349	-0.754	-2.305	0.854	1.46	2.101	0.133	0.141	2.15	1.727	1.462	1.575	1.06	1.974	3.046	0.172	2.177	1.639	-0.439	0.141	3.067	0.833	-0.667	2.279	-0.711	-0.031	0.869	0.104	-0.292	-0.401	-0.76	-0.487	-1.652	0.749	-1.205	-0.22	0.817	0.505	-0.633	-1.588	-1.133	-1.418	0.071	-0.996
1.558	-0.011	1.409	-0.259	0.864	0.259	-1.247	-0.652	-1.637	1.403	-0.594	1.791	1.653	0.646	0.966	2.435	-0.942	2.154	0.867	-1.382	1.254	0.794	-0.375	2.709	2.2	0.4	0.039	2.204	1.358	1.603	0.372	1.269	0.413	-0.796	0.377	0.065	-0.68	-0.144	-1.342	-1.747	1.011	-0.065	-0.974	-0.456	0.707	-0.743	0.72	-2.038	-1.789	-1.102
0.319	0.918	-2.311	0.419	-0.013	0.21	-0.562	-0.931	2.174	0.003	0.863	-2.992	0.63	0.909	-1.543	0.407	1.746	-3.541	-1.109	1.013	-2.837	0.177	-0.108	-3.467	0.456	1.908	-1.048	1.737	0.794	-1.683	0.266	-0.193	-0.519	0.578	0.162	0.942	0.212	-0.887	1.97	0.021	1.07	1.264	1.658	0.472	1.032	0.463	-1.898	1.639	-1.262	-0.922
-1.526	-2.069	-0.308	-0.088	0.072	0.083	1.599	2.083	0.25	-1.911	-2.438	-0.768	-1.094	-1.589	0.154	-2.29	-3.386	-0.326	-1.208	-2.648	-1.626	-2.863	-1.934	-1.063	-0.22	-2.212	0.306	-1.605	-1.488	1.152	-0.594	-0.288	-0.411	0.416	0.444	0.571	1.056	1.702	-0.127	1.192	-0.306	0.791	-0.109	0.782	1.5	1.41	1.463	-1.123	2.096	2.389
2.143	-0.502	0.619	-0.062	-0.029	0.167	-2.099	0.52	-0.739	2.477	-0.102	1.101	1.705	-0.925	0.11	2.198	-0.333	2.177	2.272	0.978	1.004	3.534	-0.328	1.036	2	-2.007	0.13	1.963	-0.562	-0.917	0.148	-0.733	0.184	-0.267	0.676	0.132	-1.815	0.714	-0.013	0.299	1.209	-0.658	-0.037	1.2	1.088	-2.248	-0.008	0.698	-2.289	0.341
-0.011	-0.776	2.165	-0.146	-0.853	-0.511	0.103	1.449	-1.76	0.351	-1.067	2.748	-0.369	-0.531	1.457	1.282	-0.475	2.847	0.529	-2.107	2.862	-0.289	-0.749	3.66	-0.08	0.523	1.353	-1.53	-0.508	1.579	0.065	-1.227	0.12	-0.359	-0.365	-1.068	0.224	1.044	-1.101	-1.476	-0.341	-1.189	0.099	-0.85	-1.993	-0.379	1.657	-0.414	-0.041	1.749
-1.845	-0.831	-1.559	-0.08	0.144	-0.007	1.95	0.735	1.578	-2.119	-0.758	-2.237	-1.49	-0.85	-0.82	-2.588	0.246	-2.415	-2.867	-1.574	-2.334	-1.322	-0.827	-3.002	-1.077	-1.884	-0.628	-2.348	-0.759	-0.15	-0.344	0.096	-0.725	0.21	0.176	0.716	1.698	0.677	0.814	0.092	-0.909	1.181	-0.449	0.837	1.293	2.247	-0.15	0.396	2.117	0.773
-1.838	0.837	-0.722	0.412	-0.633	-0.719	1.597	-0.212	1.294	-2.561	0.815	-0.751	-1.026	0.789	-0.678	-2.893	0.163	-1.641	-3.029	1.791	-0.89	-2.998	0.306	0.12	-0.734	1.394	0.215	-0.608	1.366	-1.593	-0.351	-0.579	-0.685	1.163	-0.563	-0.687	1.941	-0.03	0.564	1.54	0.02	-1.56	1.569	-1.645	-0.79	2.976	-0.458	0.509	1.245	-0.396
-1.029	0.086	2.346	0.13	-0.001	0.016	0.968	-0.108	-2.399	-1.08	0.464	2.954	-0.902	-0.296	1.63	-1.431	-0.168	3.786	-1.854	1.24	3.035	-0.143	0.999	3.238	-1.897	-0.312	1.109	-0.717	-1.283	1.86	0.094	0.367	0.692	0.18	-0.371	-0.668	1.033	0.286	-1.682	-0.94	-0.391	-1.107	0.424	-1.405	-0.492	0.819	1.366	-1.838	0.847	-0.512
-1.76	-0.316	1.44	0.1	-0.293	0.315	1.668	0.561	-1.634	-2.155	0.32	1.491	-1.262	-0.969	1.369	-1.619	0.943	2.313	-3.139	-0.059	1.792	-2.236	0.782	0.509	-1.757	-1.432	0.545	-1.262	-1.604	2.287	0.122	-0.705	0.942	0.072	0.127	-0.313	1.412	0.036	-1.081	-0.207	1.132	-0.076	-0.726	-0.226	-1.079	2.262	-0.041	-0.362	1.823	1.093
1.678	-1.151	-1.71	0.066	-0.047	0.049	-1.71	1.172	1.668	1.708	-1.634	-2.248	1.563	-0.643	-1.111	2.699	-1.53	-2.693	0.894	-1.449	-2.967	1.633	-2.655	-1.886	1.822	0.357	-1.436	2.345	-0.771	-0.301	0.157	-0.595	-0.481	-0.027	0.501	0.58	-1.484	0.614	1.146	0.174	1.488	0.064	0.785	0.387	1.373	-2.203	0.713	0.242	-1.835	1.693
-0.04	2.448	0.34	-0.331	-0.14	0.048	0.219	-2.364	-0.318	0.417	2.966	0.465	-0.506	1.832	0.22	1.264	2.906	-0.278	0.944	2.802	1.384	-0.043	3.97	0.322	-0.945	1.861	-0.769	-1.32	1.884	0.973	0.171	0.446	0.128	-0.834	-0.737	-0.021	-0.399	-2.149	0.122	-1.268	-0.564	-1	-1.636	-0.637	0.759	-0.167	-2.228	1.218	0.778	-2.493
2.003	0.816	0.997	-0.171	0.084	0.114	-1.933	-0.84	-1.05	2.565	1.062	0.599	1.34	0.51	1.369	2.184	1.683	-0.218	3.087	0.155	0.264	3.285	1.728	1.242	0.832	1.329	1.935	1.84	-0.111	2.068	0.325	-0.341	0.6	-0.692	0.513	-0.352	-1.993	-0.141	-0.621	-0.057	0.788	-1.258	-0.848	1.482	0.097	-2.497	-0.439	0.349	-1.797	-1.452
1.794	1.231	-0.409	0.035	-0.731	-0.573	-1.912	-0.59	0.771	2.379	1.428	-0.06	1.137	0.952	-0.753	2.672	2.522	-0.373	3.321	0.828	-0.314	2.309	1.301	1.034	1.213	0.846	-1.872	0.326	1.618	-0.583	0.689	-0.478	-0.331	-0.674	-0.871	-0.792	-1.883	-0.401	-0.027	-0.677	-2.014	-0.661	-0.804	-0.582	-1.904	-1.895	0.755	-0.023	-1.87	-0.802
-2.132	-0.824	1.166	0.017	0.046	-0.041	2.107	0.869	-1.127	-2.799	-0.672	1.329	-1.372	-0.893	0.994	-2.951	0.121	2.076	-3.271	-1.66	1.619	-3.314	-0.448	0.358	-1.412	-1.637	0.144	-0.816	-1.481	1.73	-0.541	0.309	0.373	0.563	-0.21	-0.462	1.341	1.071	-0.946	0.348	-0.847	-1.33	1.218	-0.884	0.179	0.906	1.561	-1.904	2.787	0.631
-0.691	-2.344	0.242	-0.222	0.153	-0.355	0.825	2.272	-0.007	-0.367	-2.979	0.329	-0.967	-1.608	0.134	-1.251	-3.719	0.512	0.246	-2.959	1.255	0.311	-3.376	-0.48	-1.672	-1.316	0.941	-1.655	-1.554	-0.771	0.102	-0.509	-0.116	-0.544	0.828	-0.58	0.379	2.048	-0.666	-1.397	1.014	0.091	-0.904	0.725	-1.626	1.133	1.774	-1.415	1.187	2.421
0.041	2.242	1.325	-0.067	0.054	-0.06	-0.038	-2.254	-1.288	0.3	2.94	1.295	-0.225	1.471	1.28	1.381	2.916	1.248	-0.028	3.348	2.281	-0.063	3.565	0.461	-1.324	1.454	1.533	0.316	0.802	1.994	0.02	0.798	-0.11	-0.16	-0.701	-0.021	0.108	-1.475	-1.263	-1.197	-0.902	0.347	0.49	-1.121	0.724	-0.509	-0.973	-2.068	-0.207	-2.926
-2.313	0.57	-1.068	0.004	-0.123	-0.029	2.301	-0.494	1.109	-3.015	0.455	-1.113	-1.508	0.636	-0.961	-3.432	1.315	-1.728	-3.613	0.277	-0.198	-3.289	-0.452	-1.728	-1.346	1.609	-0.456	-1.1	0.681	-1.97	-0.68	-0.429	-0.234	0.693	0.176	0.167	1.631	-0.836	0.775	0.483	1.031	0.865	1.234	0.592	-0.716	1.251	-1.555	1.47	2.857	-0.116
1.839	-0.319	1.537	-0.156	-0.461	0.163	-1.682	0.653	-1.631	2.244	0.263	1.538	1.346	-0.933	1.464	3.045	0.247	0.704	2.821	0.2	2.508	1.669	1.176	1.362	0.794	-0.97	2.363	1.923	-1.865	1.599	0.466	-0.916	0.225	-0.742	0.014	0.102	-1.111	0.098	-1.426	-0.515	1.072	0.48	-1.568	-0.435	0.753	-0.255	0.264	-2.137	-2.186	1.18
-2.183	-0.945	-0.406	0.005	0.235	0.308	2.239	0.761	0.241	-2.5	-1.452	-0.826	-1.753	-0.39	0.031	-3.577	-1.526	-0.633	-2.07	-2.511	-0.736	-2.47	-1.198	-1.912	-1.883	-0.679	1.06	-2.246	0.628	-0.025	-0.281	-0.264	-0.201	0.305	0.709	0.833	1.844	0.559	0.916	-0.23	0.708	1.804	0.039	1.732	0.498	2.166	1.275	1.749	2.547	0.953
1.594	0.613	1.716	-0.226	-0.123	0.341	-1.446	-0.535	-1.929	2.086	1.114	1.5	0.99	0.079	1.906	2.292	1.199	0.368	3.106	0.957	1.863	1.64	2.047	1.796	0.812	0.171	2.994	1.454	-0.916	1.879	-0.301	0.141	1.065	-0.149	-0.375	-0.381	-1.444	-0.333	-1.133	0.201	-1.405	-0.397	0.599	0.135	-0.934	-2.126	-0.999	-0.551	-1.369	-0.733
2.049	0.172	0.424	-0.266	-0.393	0.909	-1.847	0.205	-1.164	2.484	-0.253	0.078	1.507	0.589	0.807	3.457	0.298	-0.063	1.979	-0.595	-0.887	2.66	-1.191	0.725	1.379	1.489	0.176	2.034	0.968	1.728	0.241	-0.04	1.388	-0.751	-0.662	0.347	-1.303	0.427	-0.597	-1.602	-1.162	0.849	-0.18	-1.385	-0.308	-1.868	1.15	0.062	-2.325	-0.065
-0.647	1.711	-1.678	0.329	0.194	0.288	0.487	-1.828	1.501	-0.943	1.646	-2.322	-0.3	1.693	-0.949	-1.096	2.745	-2.673	-1.959	1.131	-2.327	-0.403	1.111	-3.159	-0.952	2.168	-0.235	0.56	2.397	-1.017	0.04	0.246	-0.418	0.62	0.141	0.997	1.073	-1.269	1.376	-0.029	0.52	1.771	1.478	0.84	0.908	1.738	-1.806	0.721	-0.075	-2.271
-1.736	-1.769	-0.616	-0.061	0.037	-0.002	1.755	1.782	0.67	-2.221	-1.905	-1.145	-1.185	-1.552	-0.063	-2.812	-2.84	-0.864	-1.853	-2.104	-2.156	-2.924	-1.083	-1.272	-0.359	-2.303	-0.047	-1.511	-1.489	0.979	-0.698	-0.108	-0.379	0.567	0.202	0.402	1.027	1.692	0.345	1.425	-0.332	-0.052	0.466	-0.205	1.424	1.157	1.906	-0.791	2.404	1.799
2.191	-0.985	0.065	-0.025	-0.131	-0.003	-2.138	1.091	-0.112	2.426	-1.352	0.666	1.867	-0.59	-0.585	2.087	-2.383	0.764	1.938	-0.837	1.519	3.477	-1.281	0.693	2.203	-1.159	-1.492	2.297	0.409	-0.564	0.344	-0.494	-0.582	-0.385	0.258	0.575	-1.877	0.519	0.42	0.048	1.214	0.789	-0.263	-0.397	1.428	-2.497	-0.39	0.263	-2.298	1.604
0.017	-0.832	2.192	-0.225	-0.779	-0.447	0.277	1.52	-1.824	-0.037	-1.286	2.777	0.087	-0.383	1.504	0.652	-2.16	2.741	-1.071	-1.689	2.825	0.137	-0.676	3.652	1.051	0.22	1.417	-0.858	0.209	1.545	-0.005	-1.156	0.184	-0.389	-0.28	-1.018	0.518	0.963	-1.263	-1.476	0.037	-0.912	-0.325	-0.931	-1.929	0.498	1.571	-0.303	0.032	1.973
-1.804	-0.675	-1.701	-0.15	-0.131	0.224	1.915	0.825	1.507	-1.882	-1.147	-2.245	-1.649	-0.187	-1.081	-1.215	-0.967	-3.098	-2.903	-1.025	-2.631	-1.718	-2.18	-1.908	-2.51	-0.238	-0.352	-1.576	0.859	-1.44	-0.377	-0.582	-0.359	0.092	0.365	0.771	1.615	0.425	0.878	-0.286	0.002	1.741	-0.322	1.283	0.503	1.997	-0.61	0.873	2.113	1.19
-1.611	1.273	-0.671	0.14	-0.782	-0.712	1.567	-0.616	1.208	-2.296	1.454	-0.729	-0.873	0.992	-0.597	-2.809	1.085	-1.682	-2.349	2.546	-0.826	-2.814	1.132	0.183	-0.358	1.374	0.284	-0.344	1.437	-1.521	-0.595	-0.505	-0.665	0.896	-0.933	-0.708	1.755	-0.384	0.486	1.348	-0.61	-1.756	1.008	-2.035	-0.564	2.872	-0.568	0.397	1.356	-0.88
-0.955	-1.147	2.055	-0.059	0.083	-0.025	0.976	1.106	-2.04	-0.759	-1.364	2.709	-1.107	-0.882	1.326	-1.63	-1.522	3.374	-0.108	-0.57	3.17	-0.16	-2.335	2.569	-1.943	-0.191	1.413	-1.448	-1.702	0.649	0.06	-0.176	0.713	-0.186	0.342	-0.769	0.981	1.079	-1.245	-1.044	0.987	-0.714	-0.394	-0.465	-1.476	1.023	2.062	-0.796	0.917	1.1
-1.882	0.24	1.469	0.135	-0.188	0.374	1.73	-0.171	-1.671	-2.336	0.648	1.129	-1.352	-0.207	1.801	-1.797	1.645	0.982	-3.236	0.831	1.772	-2.513	0.374	0.006	-1.656	-1.295	1.87	-1.12	0.108	2.816	0.082	-0.064	1.129	0.172	-0.316	-0.366	1.65	-0.249	-0.87	-0.333	0.452	-0.969	-0.118	-1.354	-0.653	2.146	0.66	-0.429	1.725	-0.108
1.246	-0.781	-2.157	0.126	0.013	0.064	-1.302	0.82	2.143	1.463	-1.356	-2.52	0.985	-0.176	-1.692	1.762	-1.151	-3.551	0.559	-2.046	-2.553	2.369	-1.925	-2.049	0.229	0.382	-2.326	1.843	0.48	-1.511	0.298	-0.619	-0.352	-0.035	0.646	0.489	-0.911	0.273	1.723	-0.662	1.264	-0.175	0.938	1.159	0.735	-1.667	-0.407	1.398	-1.627	1.37
0.441	2.131	1.13	-0.358	0.046	-0.109	-0.248	-2.169	-1.071	0.869	2.345	1.659	-0.001	1.822	0.539	1.899	2.273	1.374	0.767	1.722	2.61	0.685	3.471	1.891	0.051	2.374	-0.436	-1.034	1.93	0.934	0.177	0.365	0.345	-0.907	-0.282	-0.548	-0.826	-1.839	-0.612	-0.82	0.231	-1.583	-1.859	0.067	-0.041	-0.761	-2.16	0.393	0.286	-2.394
2.171	0.116	0.757	-0.107	0.208	0.336	-2.121	-0.281	-0.942	2.59	0.04	0.169	1.651	0.169	1.37	2.604	1.11	-0.181	2.169	-0.567	-0.666	3.579	-0.311	0.445	1.787	1.196	1.77	1.932	-0.576	2.131	0.166	-0.164	0.967	-0.387	0.572	-0.292	-1.874	0.447	-0.708	0.181	0.412	-1.214	-0.327	1.688	-0.223	-2.514	0.855	0.135	-2.286	-0.968
2.079	0.101	-0.681	-0.185	-0.943	0.133	-1.954	0.676	0.468	2.813	0.038	-0.573	1.256	0.109	-0.737	3.296	0.831	-1.25	3.187	-0.967	-0.781	2.974	0.32	0.499	1.041	-0.238	-1.776	0.943	1.221	-0.731	0.557	-0.756	0.318	-0.93	-1.019	-0.117	-1.819	0.222	-0.185	-1.446	-1.549	0.733	-0.983	-1.628	-1.054	-1.424	0.782	-0.978	-2.021	1.057
-1.224	-2.001	1.117	0.219	-0.017	0.169	1.07	1.998	-1.192	-1.778	-2.203	1.551	-0.625	-1.7	0.654	-1.727	-1.676	2.486	-1.666	-3.275	1.818	-2.804	-1.979	1.066	-0.814	-1.986	-0.39	0.347	-2.279	0.954	-0.336	-0.235	0.662	0.771	0.208	-0.318	0.592	1.685	-0.61	0.521	-0.411	-1.249	1.715	-0.151	-0.038	-0.415	1.991	-1.129	1.528	2.194
0.348	-2.328	-0.665	-0.355	0.129	-0.222	-0.119	2.299	0.821	0.898	-2.721	-0.892	-0.209	-1.818	-0.433	0.578	-3.807	-0.81	1.842	-2.635	-0.375	1.044	-2.623	-1.965	-0.449	-1.937	0.691	-1.191	-2.042	-0.939	0.229	-0.312	-0.53	-0.929	0.585	0.089	-0.607	2.091	0.221	-1.218	0.126	1.112	-1.838	0.39	-0.553	-0.058	2.47	-0.715	0.318	2.424
-0.369	2.053	1.479	-0.097	0.032	0.025	0.422	-2.139	-1.472	-0.438	2.787	1.424	-0.281	1.228	1.464	0.201	3.305	0.714	-0.347	3.183	2.461	-1.478	3.05	1.084	-1.161	0.716	1.964	0.698	1.075	2.003	-0.222	0.803	0.03	0.032	-0.754	0.011	0.183	-1.385	-1.39	-0.875	-1.199	0.458	0.91	-0.869	0.677	-0.678	-1.15	-2.001	0.618	-2.827
-2.457	-1.02	-0.134	-0.023	0.104	0.013	2.423	0.961	0.132	-3.059	-1.126	-0.498	-1.757	-0.857	0.211	-3.6	-2.007	0.03	-2.98	-1.298	-1.611	-3.651	-0.223	-0.399	-1.248	-1.871	0.34	-1.982	-0.362	1.195	-0.625	-0.032	-0.422	0.563	0.232	0.459	1.737	0.847	-0.275	1.045	-0.795	0.758	0.334	0.876	1.338	2.104	0.123	-1.122	2.992	1.046
1.317	-0.348	1.83	-0.063	-0.459	0.054	-1.264	0.631	-1.909	1.748	0.239	1.904	0.84	-0.974	1.659	2.712	0.175	1.257	2.085	0.346	2.99	0.993	1.104	1.81	-0.065	-0.994	2.355	1.389	-1.902	1.898	0.198	-1.102	0.295	-0.328	0.19	-0.185	-0.948	-0.03	-1.588	0.495	1.007	-0.344	-1.201	0.555	0.505	-0.184	-0.47	-2.171	-1.532	1.253
-2.391	-0.542	0.206	0.085	0.511	0.223	2.325	0.215	-0.322	-2.759	-1.179	0.207	-1.907	0.113	0.192	-3.803	-0.887	0.128	-2.686	-1.664	1.212	-2.461	-1.883	-0.659	-2.109	0.673	1.127	-2.287	0.845	-0.609	-0.391	-0.049	0.016	0.547	1.075	0.444	2.041	0.664	0.317	0.314	1.232	1.538	0.379	1.919	-0.188	2.7	1.593	0.298	2.509	-0.184
2.014	0.947	0.878	-0.155	0.048	0.363	-1.91	-0.996	-1.11	2.317	1.499	0.497	1.61	0.355	1.255	2.222	1.481	-0.566	3.397	1.436	0.696	1.895	2.471	0.907	1.692	0.517	2.323	2.076	-0.688	1.082	0.059	0.249	1.056	-0.36	-0.175	-0.329	-1.817	-0.555	-0.429	0.186	-1.074	-0.548	-0.091	0.633	-1.113	-2	-1.245	0.474	-1.929	-1.38
1.531	-0.771	1.209	-0.604	-0.93	0.038	-1.05	1.517	-1.143	2.172	-0.819	0.84	0.781	-0.758	1.559	2.951	-0.599	1.6	2.29	-0.086	-0.007	2.245	-1.914	0.422	0.725	0.334	1.658	0.743	-1.167	2.593	-0.433	-1.228	0.742	-0.706	-0.509	-0.617	-0.821	1.017	-0.464	-1.721	-0.847	-0.929	0.063	-0.814	-1.348	-1.553	1.15	0.326	-1.264	1.897
-0.743	1.048	-2.067	-0.007	0.213	0.259	0.81	-1.158	1.924	-0.826	0.839	-2.745	-0.602	1.199	-1.295	-1.328	1.657	-3.35	-1.582	0.04	-2.682	0.178	0.646	-3.235	-1.614	1.426	-0.945	-0.07	2.147	-1.253	-0.062	0.028	-0.471	0.061	0.405	0.99	1.022	-0.416	1.811	-0.953	0.468	1.476	0.565	1.462	0.978	2.044	-0.358	1.416	0.564	-1.806
-1.746	-1.785	-0.522	0.031	0.067	-0.223	1.697	1.812	0.683	-2.436	-1.912	-0.732	-0.994	-1.557	-0.314	-2.486	-2.984	-0.483	-2.59	-1.737	-1.823	-3.183	-1.299	-0.143	-0.353	-2.316	-0.829	-0.866	-1.804	0.689	-0.676	-0.093	-0.542	0.729	0.243	0.12	1.082	1.731	0.226	1.44	-0.24	-0.635	0.839	-0.201	1.181	1.292	2.188	-0.765	2.244	1.83
1.691	-1.24	1.288	0.101	0.089	-0.073	-1.749	1.119	-1.237	1.521	-1.522	1.906	1.801	-0.936	0.586	0.735	-2.232	1.755	1.133	-0.706	2.557	2.418	-1.865	2.368	2.444	-1.651	-0.074	2.431	-0.011	0.845	0.471	-0.56	-0.274	-0.281	0.737	0.128	-1.697	0.788	-0.493	0.416	1.674	0.013	-0.473	0.546	1.258	-2.231	-0.173	-0.565	-1.714	1.401
0.759	-0.317	2.386	-0.427	0.616	0.101	-0.353	-0.225	-2.421	0.643	-0.552	3.074	0.804	-0.039	1.621	-0.354	-0.801	3.056	0.804	0.244	3.799	1.273	-1.485	3.264	1.316	-0.858	1.083	1.587	0.804	1.638	-0.475	0.374	0.854	-0.293	0.76	-0.665	-0.17	-0.421	-1.645	0.572	1.384	-0.844	-1.175	1.352	-0.912	0.841	-0.944	-1.685	-0.527	0.018
-1.739	0.441	-1.555	0.185	-0.962	-0.138	1.548	0.417	1.633	-2.049	0.536	-2.217	-1.344	0.267	-0.857	-1.37	0.924	-3.033	-2.784	1.352	-2.036	-2.564	-0.41	-2.606	-2.095	0.037	-0.01	-0.896	1.245	-0.517	-0.271	-0.859	-0.756	0.6	-0.91	0.5	1.042	0.455	0.957	1.48	-1.572	0.275	0.07	-1.532	1.325	1.627	0.998	0.17	1.989	0.325
-1.739	1.037	-0.579	-0.066	-0.975	-0.362	1.871	-0.204	0.816	-2.401	1.288	-0.483	-1.015	0.695	-0.653	-3.142	0.63	-0.986	-2.531	2.365	-0.827	-2.595	1.177	0.598	-0.234	1.383	-0.176	-0.923	0.708	-1.773	-0.758	-0.702	-0.168	0.683	-1.111	-0.527	1.868	-0.276	-0.008	0.725	-1.079	-1.65	0.823	-2.238	-0.401	2.762	-0.751	-0.197	1.803	-0.182
-2.204	-0.402	1.302	0.052	-0.047	0.011	2.192	0.435	-1.289	-2.586	-0.213	1.912	-1.72	-0.571	0.651	-3.5	-0.873	1.942	-2.898	0.856	1.909	-2.053	-0.426	2.865	-2.336	-0.222	-0.253	-1.433	-1.595	0.518	-0.387	0.249	0.555	0.495	-0.332	-0.523	1.704	0.632	-0.654	-0.023	-0.422	-1.516	0.807	-1.381	-0.409	1.238	1.648	-0.699	2.594	0.201
-2.133	-0.341	1.098	0.116	-0.01	0.38	2.073	0.306	-1.359	-2.708	-0.219	0.698	-1.437	-0.435	1.486	-3.057	0.88	0.815	-3.597	-0.866	1.067	-2.591	-0.415	-0.364	-1.225	-1.532	1.583	-1.639	-0.098	2.543	-0.049	0.209	1.094	0.285	-0.251	-0.331	1.825	0.141	-0.583	-0.398	0.4	-0.923	0.025	-1.369	-0.593	2.019	1.021	0.068	2.221	0.438
0.796	-0.947	-2.049	-0.511	0.574	-0.295	-0.354	0.429	2.297	0.842	-1.094	-2.772	0.685	-0.757	-1.264	1.754	-1.593	-3.101	0.757	-0.066	-3.242	-0.028	-1.68	-3.015	1.596	-0.225	-0.971	0.697	-1.692	-0.67	-0.517	0.123	-0.913	-0.438	0.93	0.377	-0.551	0.077	1.589	-1.255	1.742	0.371	0.545	1.433	0.436	-1.603	-0.33	1.707	-0.154	0.813
0.19	2.407	0.079	-0.352	-0.101	0.124	0.032	-2.4	-0.2	0.479	2.958	0.462	-0.1	1.739	-0.298	1.392	2.574	0.95	-0.173	3.32	1.283	0.658	3.823	-0.242	0.244	1.688	-1.33	-1.141	2.023	-0.324	0.136	0.399	0.407	-0.828	-0.638	-0.183	-0.571	-2.043	0.192	-0.923	-0.411	-1.267	-1.797	-0.27	0.246	-0.404	-2.096	1.296	0.574	-2.654
1.875	1.064	0.476	-0.325	0.523	-0.061	-1.65	-1.405	-0.468	2.386	0.578	0.401	1.249	1.564	0.541	2.344	-0.2	-0.456	2.366	-0.103	1.318	3.401	1.1	0.324	1.345	2.312	-0.264	1.281	2.025	1.579	-0.065	0.758	0.621	-0.573	0.253	-0.752	-1.79	-0.612	-0.633	0.408	-0.18	-1.127	-0.917	1.204	-1.322	-2.531	-0.074	-0.01	-1.439	-2.112
2.073	-0.165	-0.333	-0.282	-0.728	0.562	-1.944	0.771	-0.152	2.776	-0.214	-0.147	1.262	-0.11	-0.451	3.383	0.308	-0.895	3.119	-1.253	-0.206	2.959	0.009	0.912	1.207	-0.823	-1.295	0.987	0.855	-1.004	0.397	-0.412	0.734	-0.964	-0.967	0.286	-1.75	0.062	-0.513	-1.445	-1.208	1.256	-1.007	-1.855	-0.419	-1.173	0.32	-1.427	-2.097	1.386
-1.647	-1.162	1.343	-0.08	-0.113	-0.4	1.685	1.244	-1.092	-1.972	-1.056	1.944	-1.257	-1.208	0.691	-1.233	-1.135	2.792	-2.799	-1.827	2.091	-2.42	-0.049	1.923	-1.923	-1.45	-0.257	-0.627	-2.069	0.785	-0.481	0.034	0.233	0.328	-0.251	-1.023	1.048	0.984	-1.524	-0.322	-0.612	-1.829	1.055	-1.132	-0.983	1.48	0.716	-2.542	2.233	1.424
0.789	-2.334	0.162	-0.459	-0.014	-0.049	-0.502	2.337	-0.12	1.346	-2.702	-0.111	0.195	-1.861	0.408	1.357	-3.56	0.516	2.281	-2.239	0.162	1.278	-2.895	-1.128	0.261	-1.884	1.52	-0.803	-2.341	0.072	0.185	-0.447	-0.255	-1.086	0.422	0.176	-1.046	1.833	-0.414	-1.317	0.263	1.277	-1.91	-0.105	-0.299	-0.721	1.722	-1.47	-0.006	2.728
0.255	2.453	0.761	0.189	0.001	-0.021	-0.423	-2.47	-0.731	0.436	3.126	0.557	0.067	1.685	0.919	1.528	3.218	0.193	0.238	3.802	1.421	-0.126	3.472	-0.313	-0.989	1.611	1.208	0.718	1.292	1.841	0.363	0.702	-0.231	-0.006	-0.707	0.183	-0.242	-1.694	-0.928	-0.953	-0.64	0.741	0.709	-1.225	0.884	-0.996	-1.105	-1.55	-0.579	-3.154
-2.354	-1.034	0.472	0.014	0.015	0.028	2.368	1.002	-0.483	-3.019	-1.054	0.166	-1.606	-0.967	0.745	-3.444	-1.975	0.642	-2.966	-1.162	-0.924	-3.629	-0.141	0.575	-1.177	-1.963	0.719	-1.548	-0.498	1.737	-0.748	-0.002	-0.165	0.778	0.018	0.225	1.6	0.993	-0.62	1.223	-0.927	0.125	0.752	0.388	1.271	1.37	0.785	-1.687	3.065	0.963
1.606	-1.411	1.014	-0.059	-0.354	-0.311	-1.604	1.63	-0.855	2.178	-1.02	1.323	0.954	-1.784	0.615	2.921	-0.657	0.566	2.64	-1.718	2.16	1.788	-0.12	1.925	0.229	-2.05	1.319	1.4	-2.716	0.167	0.418	-0.87	-0.552	-0.538	0.174	-0.067	-1.12	1.064	-1.169	-0.121	0.809	0.778	-1.233	-0.527	0.395	-0.289	1.539	-1.748	-2.036	2.113
-2.346	0.068	-0.856	0.147	0.291	-0.096	2.243	-0.301	0.939	-3.052	-0.021	-0.69	-1.547	0.144	-0.95	-3.568	0.326	-1.642	-3.397	0.616	0.142	-3.284	-1.051	-0.437	-1.376	1.12	-1.502	-1.218	-0.518	-1.678	-0.565	0.099	0.147	0.858	0.467	-0.332	1.967	0.433	0.7	0.921	1.462	-0.775	1.23	-0.158	-1.174	2.851	0.98	0.357	2.444	-0.997
1.716	1.477	0.692	0.149	-0.251	0.252	-1.859	-1.338	-0.837	1.498	2.16	0.749	1.86	0.687	0.634	0.861	2.536	-0.024	2.452	2.77	0.632	1.14	2.485	1.755	2.593	0.37	1.393	2.425	0.494	-0.28	0.696	-0.377	0.742	-0.403	-0.135	-0.24	-1.408	-1.289	-0.193	-0.013	-0.087	-1.271	-0.83	0.848	0.033	-0.895	-2.285	0.011	-2.24	-1.321
1.52	-1.166	0.598	-0.785	-0.709	0.265	-0.815	1.747	-0.636	1.955	-1.296	0.018	0.984	-1.033	1.205	3.026	-1.376	0.325	1.738	-0.609	-0.854	1.635	-2.285	-0.317	1.173	0.066	1.493	1.212	-1.677	2.026	-0.545	-1.09	0.908	-0.929	-0.243	-0.32	-0.618	1.256	-0.01	-1.968	-0.394	-0.727	-0.307	-0.435	-1.212	-1.282	1.557	0.819	-0.988	2.132
-0.983	-0.273	-2.136	0.37	0.604	-0.084	0.696	-0.109	2.169	-1.052	-0.865	-2.543	-0.844	0.351	-1.668	-1.858	-0.662	-3.259	-1.303	-1.691	-1.825	-0.161	-1.241	-3.078	-1.686	0.509	-1.049	-0.738	1.344	-2.197	0.254	0.117	-0.651	0.459	1.086	0.489	1.124	0.417	1.72	-0.512	1.478	0.848	1.028	1.992	0.081	2.119	-0.037	1.396	0.243	-0.575
-1.151	-1.902	-1.25	-0.081	0.024	0.024	1.179	1.864	1.266	-1	-2.312	-1.796	-1.247	-1.422	-0.657	-1.685	-3.098	-1.816	0.047	-2.706	-1.889	-1.239	-1.643	-2.648	-1.264	-1.977	0.303	-2.268	-0.92	-0.762	-0.206	-0.261	-0.669	0.032	0.303	0.732	1.002	1.464	0.611	0.487	-0.512	1.384	-0.967	0.778	1.008	1.985	0.951	0.328	1.287	2.188
2.061	-0.805	0.673	-0.011	0.099	0.001	-2.046	0.748	-0.698	2.139	-1.512	0.776	1.91	-0.033	0.515	2.304	-2.066	-0.182	1.34	-2.011	1.259	3.024	-1.638	1.439	2.8	0.456	-0.027	1.716	0.458	1.526	0.661	0.321	-0.328	-0.681	-0.12	0.327	-1.852	0.008	-0.51	-0.966	0.414	1.203	-0.513	-1.204	0.69	-1.726	-0.608	-1.429	-2.166	1.436
0.253	0.625	2.26	-0.316	-0.872	0.076	-0.015	0.146	-2.3	0.512	0.546	2.913	-0.031	0.633	1.525	1.422	-0.086	2.928	-0.184	0.125	3.617	0.794	1.484	3.347	0.599	1.337	0.861	-1.056	1.098	1.538	-0.024	-0.772	0.828	-0.579	-0.843	-0.683	0.248	0.042	-1.546	-1.681	-0.582	-0.716	-0.431	-1.893	-1.103	0.265	1.101	-1.186	-0.302	0.206
-1.044	0.219	-2.115	0.563	-0.69	-0.161	0.588	0.39	2.227	-1.128	0.276	-2.809	-0.86	0.116	-1.341	-0.327	0.676	-3.449	-1.9	1.048	-2.909	-1.588	-0.661	-3.244	-1.672	-0.567	-1.038	-0.931	1.145	-0.897	0.513	-0.47	-0.917	0.539	-0.801	0.602	0.585	0.509	1.402	1.36	-1.418	0.866	-0.338	-1.376	0.886	1.421	1.119	1.145	0.582	0.22
-1.749	1.342	-0.415	-0.115	-0.944	-0.448	1.942	-0.575	0.696	-2.357	1.608	-0.141	-1.089	0.968	-0.677	-3.163	0.994	-0.445	-2.5	2.597	-0.686	-2.314	1.743	0.956	-0.298	1.705	-0.304	-1.086	0.951	-1.75	-0.753	-0.526	-0.235	0.582	-1.24	-0.658	1.921	-0.645	-0.12	0.679	-1.199	-1.753	0.455	-2.243	-0.328	2.683	-1.282	-0.487	1.912	-0.546
-2.513	0.16	0.134	0.003	0.04	-0.071	2.567	-0.179	-0.046	-3.019	0.544	0.432	-1.879	-0.221	-0.156	-4.003	0.21	0.089	-3.065	1.665	0.181	-3.102	0.37	1.493	-1.981	-0.157	-1.287	-1.937	-1.318	0.117	-0.622	0.416	0.229	0.646	-0.338	-0.365	1.915	0.277	0.071	0.464	-0.343	-1.442	0.594	-1.416	-0.129	2.091	1.154	-0.608	3.109	-0.626
-1.835	-1.511	0.328	0.015	0.001	0.595	1.792	1.553	-0.7	-2.057	-1.662	-0.344	-1.545	-1.276	1.056	-2.903	-1.022	-0.66	-2.482	-2.668	-0.347	-1.251	-1.693	-1.132	-0.955	-2.108	1.431	-2.381	-1.074	1.674	-0.597	-0.036	1.088	0.601	0.063	0.077	1.348	1.442	-0.006	0.322	-0.329	-0.9	1.25	-0.794	0.403	0.654	2.288	-0.002	2.176	1.582
0.318	-0.276	-2.318	-0.878	0.127	0.016	0.439	0.136	2.327	0.176	-0.561	-2.978	0.398	0.014	-1.545	1.216	-0.752	-3.438	-0.333	0.131	-3.695	-0.474	-1.501	-3.004	0.645	1.141	-1.747	1.264	-0.447	-1.044	-0.867	-0.159	-0.691	-0.752	0.394	0.72	0.334	-0.237	1.601	-1.73	0.157	1.258	-0.604	1.489	0.667	0.123	-1.309	1.707	0.474	0.504
0.56	2.473	-0.217	-0.326	-0.032	-0.03	-0.343	-2.452	0.235	1.101	2.92	-0.088	-0.003	1.929	-0.339	1.932	2.591	-0.76	1.427	2.795	0.965	0.879	3.997	-0.213	-0.226	1.878	-1.412	-0.937	2.275	0.239	0.295	0.429	-0.026	-0.936	-0.499	-0.043	-0.756	-1.857	0.593	-1.482	-0.583	-1.021	-1.799	0.019	0.518	-0.308	-1.713	1.555	0.043	-2.947
1.726	-0.023	1.517	0.128	0.278	-0.069	-1.8	-0.125	-1.498	1.888	-0.664	1.716	1.474	0.664	1.286	2.083	-1.334	0.86	1.107	-1.177	2.339	2.899	-0.545	2.159	2.172	1.024	0.488	1.446	1.349	2.129	0.096	0.648	0.623	0.161	-0.08	-0.78	-1.062	0.205	-1.728	0.348	-1.125	-0.559	1.121	0.403	-1.285	-1.193	1.304	-1.584	-2.423	-0.457
1.45	0.867	-1.505	0.374	0.151	0.807	-1.718	-1.123	0.817	1.815	1.447	-1.794	1.032	0.262	-1.119	1.891	1.281	-2.904	2.837	1.52	-1.39	1.278	2.317	-1.53	1.792	-0.533	-1.131	0.075	0.046	-1.716	0.529	0.687	0.266	0.19	-0.467	1.248	-0.936	-1.389	0.704	-0.106	0.015	2.248	1.116	-1.074	1.42	-0.787	-1.655	-0.384	-2.384	-0.832
-1.85	-0.868	1.34	-0.094	-0.183	-0.46	1.9	0.985	-1.092	-2.093	-0.67	1.986	-1.538	-1.022	0.617	-1.307	-0.68	2.798	-2.899	-1.381	2.211	-2.519	0.331	1.913	-2.311	-1.075	-0.141	-1.043	-2.046	0.83	-0.469	0.008	0.16	0.286	-0.367	-1.107	1.32	0.733	-1.605	-0.553	-0.454	-1.855	0.612	-1.4	-0.957	1.811	0.348	-2.564	2.386	1.161
-0.585	-2.282	-0.62	-0.294	0.083	0.246	0.769	2.194	0.498	-0.592	-2.639	-1.253	-0.567	-1.848	0.042	-1.18	-3.516	-1.166	0.45	-2.758	-1.609	-1.075	-2.05	-2.076	0.269	-2.318	0.748	-1.528	-1.699	0.653	-0.093	-0.462	-0.272	-0.472	0.619	0.779	-0.023	2.051	0.438	-0.133	0.435	1.844	-1.562	0.668	0.893	-0.333	2.324	-0.594	1.483	2.259
0.245	2.035	1.63	0.341	-0.124	0.113	-0.503	-1.954	-1.672	0.447	2.72	1.671	0.046	1.264	1.52	1.568	2.76	1.611	0.081	3.28	2.518	0.095	3.191	0.771	-1.049	1.207	1.676	0.491	0.77	2.41	0.542	0.637	0.222	0.115	-0.886	-0.004	0.089	-1.381	-1.421	-0.963	-0.893	0.429	0.809	-1.503	0.595	-0.12	-0.574	-2.141	-1.052	-2.456
-2.271	-0.286	1.334	-0.059	0.161	-0.007	2.288	0.18	-1.275	-2.984	-0.417	1.246	-1.465	-0.139	1.368	-3.548	0.424	0.806	-3.529	-0.606	2.196	-3.145	-1.179	0.472	-1.012	-1.016	1.821	-1.222	0.774	2.008	-0.834	0.066	-0.051	0.707	0.247	0.052	1.491	0.336	-1.264	1.194	-0.646	0.566	0.966	1.204	0.613	0.999	-0.406	-1.97	2.982	0.039
1.261	-1.83	0.876	0.319	-0.011	-0.249	-1.489	1.838	-0.718	1.019	-2.078	1.519	1.485	-1.492	0.172	1.189	-1.427	2.416	1.618	-2.985	1.757	-0.107	-2.32	1.44	1.259	-2.078	-0.694	2.563	-1.405	0.172	1.057	-0.097	-0.128	-0.429	0.081	-0.361	-0.741	1.52	-0.741	-0.99	-0.406	0.444	-0.645	-0.559	-1.251	-0.204	2.097	0.063	-2.181	2.061
-2.091	0.118	1.372	-0.039	0.373	-0.285	2.098	-0.318	-1.161	-2.312	-0.262	1.964	-1.776	0.501	0.714	-3.237	0.228	2.4	-1.549	-0.308	2.795	-2.615	-1.344	1.685	-1.849	1.644	0.957	-2.333	0.333	-0.196	-0.31	0.146	0.388	0.221	0.631	-0.938	1.765	0.421	-1.248	-0.049	1.642	-1.163	-0.25	-0.023	-1.697	1.974	0.629	-2.331	2.331	-1.012
1.749	1.501	0.865	0.054	0.213	-0.255	-1.801	-1.596	-0.725	2.124	1.217	1.421	1.307	1.741	0.228	1.422	0.885	2.271	2.852	1.993	1.775	2.666	0.37	1.013	2.019	2.303	-0.4	0.593	2.484	0.609	0.646	0.585	-0.573	-0.529	-0.15	0.065	-1.187	-1.151	-0.95	-1.364	0.616	0.243	-0.15	-0.807	0.948	-1.392	-0.71	-1.895	-2.361	-1.95
0.953	-1.891	0.396	-0.826	-0.344	0.162	-0.217	2.175	-0.402	1.184	-2.294	-0.188	0.625	-1.438	1.009	2.156	-2.757	0.046	1.418	-1.708	-1.069	0.393	-3.062	-0.43	1.271	-0.542	1.16	0.671	-2.001	1.941	-0.742	-0.879	0.697	-0.778	0.236	-0.319	-0.022	1.531	0.08	-1.833	0.448	-0.664	-0.373	-0.19	-1.222	-0.263	1.787	1.104	-0.43	2.715
-0.826	-0.403	-2.307	0.077	-0.312	0.108	0.759	0.588	2.263	-1.362	-0.191	-2.742	-0.252	-0.598	-1.759	-1.295	-0.571	-3.766	-1.303	0.922	-2.866	-2.332	-0.531	-2.314	0.674	-0.311	-2.163	-0.316	-1.725	-1.777	-0.453	-0.043	-0.366	0.608	-0.589	0.588	0.597	-0.192	2.064	1.524	-0.192	0.092	0.541	-1.729	0.534	-0.31	-0.626	2.55	0.883	1.307
-1.8	0.259	-1.841	-0.131	0.037	0.076	1.88	-0.265	1.769	-2.295	-0.074	-2.221	-1.245	0.584	-1.365	-2.491	0.392	-3.251	-3.175	-0.293	-1.611	-1.877	-1.056	-2.465	-1.781	1.535	-0.973	-0.39	0.826	-2.044	-0.721	-0.328	-0.244	0.461	0.391	0.386	1.318	-0.582	1.27	0.074	1.236	0.975	1.229	0.755	-0.347	0.775	-1.25	1.974	2.361	0.089
1.76	-1.314	1.008	0.097	0.044	-0.081	-1.825	1.259	-0.939	1.742	-2.039	1.136	1.721	-0.513	0.813	2.508	-2.486	0.413	0.772	-2.556	0.925	2.032	-2.25	2.16	2.767	-0.21	0.638	1.387	0.019	1.69	0.791	-0.066	-0.388	-0.596	0.133	0.225	-1.726	0.466	-0.813	-0.525	1.009	0.914	-0.938	-0.758	0.776	-1.383	0.082	-1.772	-1.857	1.985
-0.556	1.869	1.275	-0.246	-0.734	0.587	0.74	-1.258	-1.795	-0.303	2.392	1.741	-0.778	1.227	0.777	0.841	2.392	1.901	-0.739	2.157	2.74	-0.747	3.395	1.465	-0.563	1.617	-0.24	-1.926	1.199	0.9	-0.221	-0.188	1.124	-0.262	-1.179	-0.032	0.429	-0.688	-1.309	-1.298	-1.342	-0.294	0.196	-2.131	0.227	-0.234	-0.106	-1.952	0.994	-1.822
-0.474	1.208	-1.971	-0.657	-0.634	-0.05	0.996	-0.603	2.06	-0.397	1.239	-2.685	-0.562	1.107	-1.189	0.284	0.456	-3.028	-0.078	2.27	-3.033	-1.331	1.008	-3.18	-1.431	1.639	-0.763	0.326	1.498	-0.659	-0.706	-0.348	-0.789	-0.545	-0.806	0.718	0.737	-0.254	1.396	-0.474	-1.942	0.654	-1.441	-0.396	1.314	1.565	-0.358	0.625	1.177	-0.957
-0.493	2.115	-0.667	-0.583	-0.617	-0.444	1.077	-1.62	0.992	-0.854	2.714	-0.53	-0.136	1.412	-0.791	-1.943	2.727	-0.882	-0.329	3.547	-1.021	-0.959	2.771	0.574	0.862	1.499	-0.301	-0.059	1.261	-1.866	-0.847	0.08	-0.275	-0.197	-1.26	-0.581	1.097	-1.598	0.203	-0.029	-1.334	-1.68	-1.02	-2.028	-0.425	1.479	-2.609	-0.169	0.993	-1.615
-2.404	-0.713	0.824	0.021	0.044	0.054	2.426	0.692	-0.841	-3.069	-0.463	1.026	-1.639	-0.912	0.591	-3.605	-1.324	1.392	-3.651	-0.144	0.139	-3.037	0.298	1.8	-1.591	-1.572	-0.308	-1.309	-1.435	1.474	-0.697	0.279	0.201	0.752	-0.182	-0.086	1.8	0.904	-0.352	0.795	-0.813	-0.996	1.083	-0.872	0.757	1.366	1.729	-0.947	2.967	0.431
-2.429	0.188	0.193	-0.099	-0.15	0.283	2.511	-0.147	-0.348	-2.75	0.764	-0.069	-2.023	-0.419	0.506	-2.676	1.712	0.531	-3.809	0.515	-0.498	-2.202	1.068	-0.98	-2.081	-1.278	-0.189	-2.4	-0.714	1.496	-0.589	-0.158	0.865	0.406	-0.155	-0.295	1.922	-0.102	0.195	0.091	0.624	-1.05	0.268	-1.137	-0.872	1.953	0.896	0.714	2.998	-0.206
0.832	0.67	-2.116	-0.477	0.704	0.204	-0.399	-1.228	1.903	0.895	1.032	-2.771	0.702	0.333	-1.39	1.813	0.535	-3.207	0.989	2.09	-2.595	-0.083	0.756	-3.296	1.535	0.446	-0.789	0.687	-0.787	-1.537	-0.464	0.786	-0.569	-0.411	0.524	0.951	-0.368	-1.008	1.127	-1.351	0.916	1.405	0.469	1.038	1.356	-1.244	-1.421	0.626	-0.429	-1.347
-0.03	2.167	-1.13	-0.339	0.008	0.242	0.231	-2.154	0.99	0.457	2.557	-1.481	-0.51	1.682	-0.719	0.986	2.003	-2.228	1.249	2.918	-0.76	-0.151	3.388	-1.924	-1.283	1.332	-1.444	-1.032	2.324	-0.014	0.159	0.537	-0.005	-0.839	-0.514	0.489	-0.275	-1.642	1.357	-1.338	-0.937	-0.358	-1.638	-0.035	1.099	0.229	-1.313	2.267	0.677	-2.566
2.029	0.273	0.996	0.005	0.496	-0.394	-2.031	-0.552	-0.723	2.305	-0.376	1.196	1.64	0.953	0.757	2.332	-1.007	0.277	1.832	-0.923	2.046	3.327	-0.198	1.568	2.285	1.38	-0.064	1.706	1.735	1.623	0.153	0.88	0.252	-0.137	0.119	-1.033	-1.624	-0.186	-1.295	0.338	-0.86	-0.813	0.303	0.661	-1.898	-2.049	0.779	-1.512	-2.33	-0.863
1.679	0.619	-1.255	0.273	0.081	0.906	-1.885	-0.794	0.544	1.86	1.172	-1.701	1.436	0.062	-0.72	2.586	0.809	-2.478	2.313	2.037	-1.166	0.959	1.534	-2.287	2.344	-0.345	-0.224	0.949	-0.891	-1.191	0.585	0.569	0.372	-0.054	-0.476	1.328	-1.232	-1.233	0.708	-0.397	-0.018	2.283	0.693	-1.243	1.596	-0.841	-1.51	-0.297	-2.442	-0.348
-1.887	-1.242	0.915	-0.103	0.086	-0.34	1.948	1.242	-0.715	-2.102	-1.37	1.551	-1.589	-1.042	0.24	-1.339	-1.815	2.271	-2.892	-2.178	1.376	-2.534	-0.521	2.085	-2.404	-0.552	-0.334	-1.257	-1.997	-0.353	-0.433	-0.038	0.397	0.22	0.233	-1.083	1.242	1.331	-1.13	-0.609	0.323	-1.834	0.685	-0.74	-1.345	1.451	1.478	-2.202	2.56	1.108
-0.468	-2.391	0.417	-0.045	0.155	0.329	0.453	2.266	-0.596	-0.551	-2.982	0.003	-0.366	-1.703	0.792	-0.343	-3.912	0.669	0.309	-3.068	-0.599	-1.55	-3.007	-0.488	0.364	-1.689	1.617	-1.353	-1.433	1.36	-0.009	-0.499	-0.064	-0.098	0.814	0.725	-0.173	2.012	-0.094	0.825	0.812	1.318	-0.975	0.654	1.427	-1.008	1.849	-0.837	1.042	2.422
-0.292	0.988	2.472	0.018	-0.092	0.007	0.291	-0.905	-2.51	0.062	1.386	2.98	-0.605	0.564	1.855	1.139	1.147	3.131	-0.533	1.103	3.932	-0.132	2.478	2.894	-1.63	0.992	1.498	-0.784	-0.483	2.217	0.309	0.311	0.63	-0.276	-0.488	-0.62	0.641	-0.682	-1.834	-1.278	0.024	-0.94	-0.507	-1.51	-0.28	1.17	0.279	-1.962	-0.088	-1.107
-1.88	-0.095	1.777	0.1	-0.092	0.044	1.826	0.132	-1.748	-2.23	0.378	2.196	-1.442	-0.558	1.298	-1.595	0.947	2.908	-2.969	-0.331	2.618	-2.815	1.094	1.627	-2.187	-1.078	0.56	-0.865	-1.231	1.9	-0.458	0.283	0.438	0.659	-0.47	-0.332	1.396	0.504	-1.183	0.131	-1.196	-1.048	1.257	-0.994	0.348	0.615	1.095	-1.695	2.187	-0.273
0.378	-2.328	0.634	0.048	0.081	0.44	-0.401	2.299	-0.904	0.202	-2.831	0.156	0.518	-1.717	1.131	-0.911	-3.094	0.102	0.701	-3.804	0.458	0.553	-2.464	-0.824	1.603	-1.469	1.094	0.367	-2.113	2.112	-0.178	-0.369	0.991	0.284	0.531	-0.108	-0.56	1.828	-0.28	0.149	-0.036	-0.976	1.347	0.876	0.034	-1.649	1.676	-0.311	-0.205	2.687
-1.63	1.307	1.259	0.095	0.168	-0.26	1.616	-1.39	-1.067	-2.038	1.265	1.886	-1.163	1.291	0.58	-2.57	2.212	2.001	-1.336	1.032	2.739	-2.634	0.341	1.911	-0.473	2.169	0.573	-1.86	1.469	-0.298	-0.223	0.082	0.412	0.448	0.249	-0.919	1.701	-0.598	-1.105	0.781	1.368	-1.049	-0.341	0.112	-1.743	2.013	-0.397	-2.132	1.479	-2.081
1.263	2.015	-0.147	0.049	-0.016	-0.241	-1.258	-1.98	0.315	1.691	2.222	0.398	0.774	1.73	-0.734	1.094	2.389	1.36	2.359	3.017	0.194	2.404	1.398	0.714	1.302	1.835	-1.746	-0.129	2.366	-0.753	0.54	0.207	-0.762	-0.414	-0.241	0.274	-0.518	-1.711	0.186	-1.442	0.293	0.187	-0.201	0.102	1.271	-0.382	-1.946	-0.884	-1.938	-2.155
1.756	-0.992	0.027	-0.107	-0.07	-1.041	-1.66	0.904	0.887	2.346	-0.562	0.186	1.096	-1.43	-0.179	2.903	-1.091	0.938	1.936	0.454	0.573	2.924	-0.365	-0.733	0.461	-1.57	0.681	1.403	-2.299	-0.756	0.277	-0.706	-1.245	-0.484	0.517	-0.701	-1.295	0.243	0.575	-1.111	0.831	-1.573	0.274	1.311	-0.489	-1.99	-0.604	0.289	-1.959	1.527
-1.254	-1.08	-1.8	0.401	0.114	-0.167	1.034	1.033	1.86	-1.863	-1.434	-1.832	-0.577	-0.673	-1.703	-2.293	-1.621	-2.851	-2.7	-1.074	-1.172	-1.595	-2.471	-1.427	-0.749	0.286	-2.094	0.242	-1.162	-2.229	-0.163	-0.4	-0.23	0.972	0.636	-0.112	1.556	0.848	1.27	0.575	1.628	-0.503	1.859	0.207	-0.634	2.089	-0.077	1.617	0.514	1.186
-1.223	-0.659	-2.152	0.004	0.147	-0.01	1.194	0.523	2.198	-1.793	-0.504	-2.57	-0.613	-0.767	-1.632	-1.68	-1.119	-3.49	-1.976	0.573	-2.836	-2.716	-0.835	-2.05	0.293	-0.539	-2.205	-0.516	-1.924	-1.407	-0.614	0.099	-0.367	0.618	0.166	0.376	0.491	0.667	1.8	1.371	0.798	-0.23	1.051	-0.811	0.23	0.28	1.777	1.816	1.845	0.357
2.007	-0.974	0.787	0.02	0.037	-0.002	-2.048	0.935	-0.817	2.257	-1.603	0.581	1.664	-0.277	0.949	2.718	-1.611	-0.401	1.545	-2.417	0.515	3.055	-1.873	1.364	2.503	0.45	0.997	1.325	-0.23	1.973	0.677	0.394	-0.004	-0.629	-0.329	-0.014	-1.677	0.214	-0.968	-1.169	-0.285	0.983	-0.534	-1.402	-0.301	-1.214	0.207	-1.985	-2.35	1.593
-0.709	1.957	1.265	0.429	-0.382	0.585	0.263	-1.58	-1.837	-0.836	2.357	1.852	-0.554	1.474	0.647	0.206	2.603	2.219	-1.167	1.724	2.712	-1.4	3.285	1.653	-0.035	2.13	-0.191	-1.48	1.02	0.29	0.502	0.335	0.922	0.288	-1.014	0.138	0.231	-0.91	-1.451	-0.595	-1.604	0.529	1.213	-1.646	0.301	-0.655	-0.278	-1.722	0.286	-2.22
-0.121	0.76	-2.199	-0.83	-0.457	0.048	0.855	-0.381	2.179	-0.216	0.746	-2.925	-0.059	0.719	-1.377	0.806	0.918	-3.412	-1.002	1.468	-3.245	-0.656	-0.24	-3.221	-0.425	1.714	-1.022	1.068	0.597	-1.234	-0.824	-0.413	-0.707	-0.712	-0.445	0.813	0.77	-0.56	1.367	-1.345	-1.32	1.099	-1.21	0.492	1.158	1.086	-1.605	1.289	0.863	-0.211
-0.641	-0.852	-1.963	0.493	-0.707	0.436	0.378	1.438	1.592	-1.264	-1.064	-2.224	0.023	-0.624	-1.595	-1.545	-2.099	-1.824	-1.126	-1.159	-3.3	-2.071	-0.343	-2.057	0.209	0.381	-1.901	0.829	-1.223	-2.024	-0.06	-0.92	-0.067	1.057	-0.399	0.88	0.959	1.118	1.156	2.026	-0.691	0.307	1.045	-0.803	1.866	1.929	1.413	1.65	-0.154	1.636
-2.267	-1.287	0.036	-0.055	0.01	-0.062	2.27	1.287	0.013	-2.943	-1.264	0.286	-1.518	-1.242	-0.212	-3.553	-2.038	-0.263	-3.353	-0.27	0.102	-3.005	-1.502	1.394	-1.334	-1.292	-1.333	-0.95	-2.13	0.27	-0.826	0.028	0.086	0.717	-0.011	-0.207	1.447	1.285	0.145	0.888	-0.368	-1.255	1.137	-0.788	0.493	1.043	2.05	-0.484	2.991	1.23
-2.272	0.228	0.537	0.041	0.222	0.419	2.273	-0.344	-0.833	-2.666	0.144	-0.06	-1.762	0.35	1.154	-2.695	0.951	-0.784	-3.73	-0.029	0.32	-2.328	-0.73	-0.608	-1.723	-0.588	1.689	-2.244	1.073	1.844	-0.305	0.753	0.785	0.394	-0.31	0.033	1.81	0.203	-0.468	-0.158	-0.65	-0.921	0.46	-1.189	0.751	1.598	1.042	-1.179	2.638	-0.881
0.424	0.649	-2.221	-0.539	0.793	0.306	-0.035	-1.318	1.946	0.511	1.027	-2.843	0.272	0.288	-1.502	1.208	0.498	-3.528	1.002	2.057	-2.676	-0.426	1.136	-3.339	1.269	0.095	-1.038	-0.16	-0.754	-1.687	-0.683	0.948	-0.452	-0.357	0.518	1.022	-0.185	-1.035	1.18	-1.021	0.835	1.887	0.7	0.931	1.208	-1.128	-1.513	0.827	0.096	-1.494
-0.419	2.052	-0.968	-0.71	-0.246	0.196	0.934	-1.858	0.832	-0.114	2.706	-0.916	-0.733	1.307	-0.947	0.918	2.694	-0.549	-0.707	3.317	-0.242	-0.176	3.158	-1.945	-0.226	0.766	-1.819	-1.807	1.413	-1.164	-0.621	0.52	0.319	-0.758	-0.999	0.051	0.138	-1.757	1.057	-0.558	-1.328	-1.006	-1.83	-1.363	0.181	0.093	-1.481	2.167	1.636	-1.891
1.201	0.766	1.868	-0.027	0.152	-0.048	-1.163	-0.871	-1.853	1.541	0.263	2.266	0.783	1.251	1.394	2.049	-0.454	1.632	0.739	-0.225	2.902	2.273	0.827	2.923	1.473	1.861	0.764	0.391	2.031	2.027	-0.279	0.679	0.482	0.231	-0.359	-0.579	-0.447	-0.52	-1.901	0.401	-1.398	-0.12	1.117	0.115	-0.998	-0.625	0.481	-2.299	-1.797	-1.202
1.333	0.592	-1.602	-0.197	0.786	0.538	-1.118	-1.288	1.233	1.583	1.027	-2.134	1.005	0.154	-0.989	2.192	0.462	-2.873	2.249	1.798	-1.602	0.796	1.568	-2.765	1.843	-0.112	-0.311	0.516	-0.722	-1.438	-0.17	0.939	-0.237	-0.185	0.519	1.282	-0.35	-0.999	1.385	-0.999	0.959	1.892	0.827	0.735	1.657	0.367	-1.563	0.784	-1.817	-1.473
-1.843	-0.506	1.546	-0.192	0.131	-0.372	1.914	0.402	-1.34	-1.972	-0.468	2.225	-1.628	-0.515	0.791	-1.236	-1.054	2.786	-2.981	-0.842	2.37	-1.965	0.563	2.697	-2.389	0.018	0.286	-1.662	-1.546	0.489	-0.309	0.202	0.402	-0.087	0.066	-1.155	1.243	0.743	-1.529	-0.92	0.418	-1.708	0.063	-1.024	-1.353	1.219	0.829	-2.663	2.452	0.031
0.097	-1.806	1.609	0.274	-0.104	-0.337	-0.252	1.88	-1.444	0.119	-1.877	2.336	0.077	-1.642	0.805	0.015	-2.968	2.57	-0.689	-1.349	2.806	1.04	-1.577	2.835	-0.817	-1.998	0.315	0.913	-2.25	0.45	0.272	-0.158	0.436	0.274	-0.038	-1.115	0.342	1.387	-1.663	-0.654	-0.51	-1.55	1.15	-0.646	-1.462	1.305	1.82	-1.293	-0.796	2.258
-0.477	0.954	2.438	0.032	-0.01	-0.05	0.497	-0.908	-2.402	-0.201	1.219	3.104	-0.699	0.634	1.675	0.819	0.911	3.289	-0.897	0.963	3.958	-0.29	2.338	2.992	-1.288	1.464	1.182	-1.373	-0.248	1.917	0.326	0.215	0.629	-0.256	-0.213	-0.739	0.796	-0.538	-1.756	-0.983	0.506	-1.128	-0.76	-1.186	-0.534	1.332	0.309	-2.096	0.169	-1.222
-2.33	-0.777	0.795	0.109	-0.157	0.134	2.237	0.944	-0.915	-2.788	-0.807	1.338	-1.772	-0.706	0.241	-2.502	-1.549	2.084	-3.765	-1.133	0.9	-2.87	0.16	1.832	-2.2	-0.139	-0.554	-1.507	-1.711	-0.166	-0.461	-0.099	0.655	0.656	-0.176	-0.409	1.628	0.958	-0.388	0.19	-0.186	-1.417	1.1	-1.232	-0.213	0.972	1.82	-0.677	2.769	0.872
0.325	-1.361	1.964	-0.082	-0.403	-0.188	-0.344	1.57	-1.885	0.796	-1.101	2.459	-0.168	-1.61	1.345	1.849	-1.145	2.152	0.662	-1.691	3.447	0.586	-0.045	2.727	-1.164	-1.378	1.662	-0.043	-2.681	1.315	0.143	-1.105	-0.068	-0.322	0.296	-0.309	-0.135	0.809	-1.745	0.109	1.002	0.486	-1.384	0.21	-0.022	1.026	0.892	-1.762	-0.573	2.235
-1.813	0.33	1.658	0.246	0.143	0.086	1.637	-0.421	-1.693	-2.32	-0.105	2.024	-1.243	0.725	1.218	-2.694	0.61	2.764	-1.764	-0.84	2.512	-3.076	-0.407	1.356	-0.479	1.267	1.856	-1.821	1.502	0.692	-0.341	-0.271	0.343	0.832	0.557	-0.156	1.899	-0.177	-0.963	1.42	1.062	0.638	0.39	1.304	-0.812	2.802	0.519	-1.052	1.332	-0.604
0.876	2.209	-0.6	0.353	-0.142	-0.284	-1.023	-2.114	0.786	0.612	2.707	-0.178	1.187	1.598	-1.009	-0.525	2.577	-0.335	0.764	3.775	-0.569	0.724	2.632	0.871	2.265	1.729	-1.115	0.598	1.665	-2	1.059	0.082	-0.514	-0.344	-0.362	-0.066	-0.33	-1.825	0.443	-1.19	-0.269	-0.876	-0.57	0.353	0.825	-0.15	-2.404	-0.459	-1.671	-2.313
1.81	-0.74	-0.092	0.026	0.551	-0.958	-1.797	0.202	0.852	2.204	-0.472	0.516	1.354	-0.954	-0.766	2.635	-1.447	0.859	1.516	-0.004	1.224	2.937	0.318	0.251	0.66	-1.827	-0.456	2.038	-1.376	-1.562	0.511	0.168	-1.369	-0.454	0.811	-0.46	-1.237	-0.148	0.436	-1.192	1.448	-0.946	0.173	1.524	0.103	-1.672	-0.827	-0.292	-2.277	0.581
-0.476	0.418	-2.339	0.187	-0.416	0.028	0.356	-0.178	2.314	-0.955	0.815	-2.723	0.012	-0.005	-1.867	-0.796	0.786	-3.821	-0.754	1.823	-2.305	-2.038	0.539	-2.598	1.132	0.325	-1.883	-0.039	-1.061	-2.123	-0.352	-0.033	-0.375	0.724	-0.799	0.45	0.37	-0.873	1.915	1.715	-0.247	0.371	0.864	-1.815	0.049	-0.678	-1.363	1.984	0.359	0.468
-1.964	-0.717	-1.431	-0.052	0.106	0.03	1.995	0.676	1.419	-2.576	-0.554	-1.71	-1.281	-0.825	-1.066	-2.991	-1.469	-2.162	-2.441	0.121	-2.611	-3.336	-0.224	-0.974	-0.491	-0.97	-1.864	-1.41	-1.689	-0.572	-0.706	0.301	-0.217	0.599	-0.102	0.27	1.313	0.961	1.099	1.224	-0.305	-0.596	0.555	-0.979	0.964	1.498	1.852	0.49	2.6	0.382
1.536	-1.385	1.133	-0.041	0.052	0.074	-1.546	1.366	-1.162	1.683	-2.081	0.86	1.337	-0.595	1.368	2.27	-2.058	-0.068	0.769	-2.63	0.595	2.214	-2.646	1.653	2.28	-0.054	1.592	0.774	-0.664	2.355	0.646	0.335	0.268	-0.741	-0.219	-0.126	-1.401	0.602	-1.29	-1.345	-0.432	0.789	-0.514	-1.244	-0.536	-0.701	0.623	-2.133	-1.656	2.043
-1.403	1.224	1.527	0.516	0.621	-0.324	0.935	-1.77	-1.228	-1.837	1.754	1.772	-0.912	0.691	1.189	-2.598	2.07	1.05	-1.153	2.57	2.154	-2.353	1.287	2.673	-1.503	-0.179	0.953	-0.093	0.398	1.9	-0.063	1.073	-0.091	1.01	0.063	-0.497	0.513	-1.309	-0.712	1.78	0.07	0.312	1.589	0.438	-1.41	0.391	-1.809	0.275	1.368	-2.131
-0.469	0.206	-2.282	0.678	-0.623	-0.043	-0.133	0.381	2.326	-0.417	0.119	-2.971	-0.463	0.27	-1.494	-1.218	0.643	-3.502	-0.506	-0.905	-3.272	0.58	0.506	-3.376	-1.405	-0.242	-1.203	-0.487	1.304	-1.219	0.748	-0.442	-0.78	0.507	-0.691	0.703	-0.068	0.501	1.52	1.517	-0.893	1.161	-0.153	-1.572	0.895	0.669	1.353	1.383	-0.168	0.206
0.35	-0.535	-1.998	0.172	1.158	0.142	-0.583	-0.326	1.93	0.754	-0.808	-2.544	-0.026	-0.154	-1.359	1.374	-0.133	-3.087	0.01	-1.341	-3.25	1.429	-1.634	-2.089	-0.405	-1.059	-0.854	-0.993	0.208	-1.818	0.602	0.858	-0.415	-0.344	1.334	0.713	-1.047	0.202	1.52	-1.122	2.029	0.208	0.272	1.949	1.407	-1.628	0.647	2.314	-0.115	-0.753
-2.363	-0.493	0.076	0.184	-0.34	-0.126	2.265	0.672	0.023	-2.973	-0.103	0.039	-1.658	-0.875	0.116	-3.923	-0.64	0.321	-3.1	0.163	-1.02	-2.996	0.864	0.626	-1.498	-1.635	-0.672	-1.449	-1.319	1.102	-0.443	0.103	-0.087	0.824	-0.774	-0.161	2.179	-0.013	-0.378	0.75	-1.501	-1.005	0.868	-1.337	0.759	3.051	-0.687	-0.231	2.279	1.27
-1.382	-1.526	1.134	-0.372	0.387	0.284	1.623	1.278	-1.357	-1.292	-2.176	0.808	-1.463	-0.757	1.425	-1.736	-2.162	-0.21	-1.777	-3.001	1.398	-0.199	-2.315	0.71	-0.772	-0.761	2.281	-2.53	-0.808	1.926	-1.099	0.33	0.445	0.364	0.429	0.103	0.815	1.232	-1.129	0.765	-0.579	-0.098	0.805	0.822	1.035	0.298	0.855	-2.04	2.363	1.272
0.287	1.635	-1.681	-0.78	0.164	0.11	0.379	-1.764	1.617	0.14	1.881	-2.32	0.366	1.333	-0.966	0.934	2.681	-2.554	-0.838	2.199	-2.595	0.322	1.085	-3.09	0.5	2.173	-0.195	1.329	0.703	-0.877	-0.839	0.454	-0.584	-0.603	-0.143	0.779	0.329	-1.369	0.929	-1.611	-0.366	1.227	-0.221	0.656	1.404	-0.062	-2.098	0.244	0.379	-2.078
-0.457	2.321	0.039	0.359	-0.027	0.41	0.311	-2.29	-0.259	-0.683	2.736	-0.503	-0.17	1.8	0.596	-1.597	2.334	-0.993	0.106	2.947	-1.235	-1.022	3.668	-0.109	-1.11	1.627	1.2	0.609	2.299	1.16	0.267	0.548	-0.077	0.459	-0.594	0.902	0.827	-1.974	0.25	-0.603	-0.768	1.321	1.218	-0.383	1.659	1.805	-2.005	-0.223	-0.172	-2.504
0.541	0.741	1.969	-0.34	0.421	-0.145	-0.365	-0.996	-1.939	1.227	0.457	2.112	-0.224	1.011	1.735	1.957	0.698	1.329	1.175	-0.614	2.353	1.608	0.962	3.037	-0.228	2.076	1.594	-0.861	0.759	2.613	-0.791	0.311	0.469	0.106	0.531	-0.791	-0.386	-0.18	-1.984	1.105	0.193	-0.416	0.111	1.663	-0.928	-1.349	0.217	-2.275	-0.335	-1.73
0.712	0.62	-1.869	0.029	0.856	0.679	-0.68	-1.366	1.399	0.566	0.891	-2.523	0.812	0.355	-1.115	1.33	0.529	-3.229	0.732	2.017	-2.447	-0.391	0.677	-2.94	1.852	0.499	-0.721	0.573	-0.707	-1.197	-0.103	1.006	-0.065	0.206	0.581	1.375	0	-0.96	1.642	-0.509	1.036	2.11	1.238	0.942	1.714	0.854	-1.394	1.015	-1.324	-1.662
-1.724	-0.801	1.687	-0.227	-0.039	-0.411	1.794	0.783	-1.454	-1.699	-0.867	2.387	-1.694	-0.72	0.899	-0.869	-1.448	2.76	-2.666	-1.26	2.749	-1.531	0.117	2.874	-2.425	0.105	0.701	-1.775	-1.706	0.405	-0.329	-0.098	0.353	-0.14	0.035	-1.182	0.994	0.923	-1.665	-1.145	0.44	-1.488	0.066	-0.937	-1.667	1.012	0.853	-2.784	2.477	0.578
-0.707	-2.063	1.176	0.358	-0.065	-0.165	0.483	2.094	-1.121	-1.069	-2.196	1.772	-0.325	-1.835	0.506	-1.001	-3.321	1.965	-2.218	-1.953	1.861	-0.482	-1.732	2.628	-0.771	-2.245	-0.404	0.71	-2.184	0.717	-0.287	-0.312	0.222	0.992	0.172	-0.556	1.072	1.714	-0.737	1.096	-0.353	-1.474	1.883	-0.061	0.052	1.137	2.113	0.314	-0.061	2.374
-0.838	0.239	2.498	0.041	-0.004	0.028	0.829	-0.267	-2.559	-0.64	0.331	3.21	-0.981	0.153	1.688	0.004	-0.527	3.62	-1.578	0.333	3.775	-0.001	1.249	3.207	-1.713	0.903	1.387	-1.553	-0.82	1.653	0.25	0.073	0.731	-0.156	-0.108	-0.705	1.013	-0.16	-1.754	-0.751	0.855	-0.807	-0.897	-0.926	-0.775	1.579	0.823	-1.617	0.593	-0.372
-2.517	-0.056	0.532	-0.016	-0.098	-0.215	2.507	0.123	-0.418	-3.057	0.348	0.77	-1.869	-0.45	0.268	-2.781	0.898	1.729	-3.962	-0.267	0.822	-3.346	1.08	-0.029	-2.329	-1.011	-0.611	-1.449	-1.093	1.043	-0.615	0.351	-0.136	0.575	-0.548	-0.31	1.779	0.428	-0.656	0.464	-1.418	-0.974	0.86	-0.959	0.646	1.874	0.621	-1.698	3.119	-0.202
0.25	-1.55	1.937	0.192	-0.372	-0.263	-0.372	1.741	-1.745	0.181	-1.182	2.585	0.345	-1.897	1.182	0.915	-0.516	2.87	0.07	-1.946	3.387	-0.719	-0.537	2.568	-0.521	-2.447	0.906	1.19	-2.573	1.219	0.735	-0.908	-0.009	-0.351	0.169	-0.495	0.118	1.151	-1.584	-0.731	0.827	0.351	-1.093	-0.402	-1.001	1.098	1.624	-1.197	-0.861	2.219
-1.596	1.196	1.317	0.443	0.059	0.168	1.311	-1.281	-1.378	-2.357	1.203	1.324	-0.759	1.135	1.249	-2.636	1.591	2.236	-2.768	0.228	1.188	-2.743	1.88	0.547	-0.332	0.759	2.215	-0.398	2.162	1.128	-0.3	0.25	0.064	1.175	-0.157	0.283	1.376	-1.378	-0.55	1.38	-0.256	1.357	1.887	0.627	-0.117	2.396	-1.735	-0.299	1.242	-1.125
1.38	1.658	-0.871	0.197	-0.17	-0.281	-1.47	-1.548	1.072	1.509	2.162	-0.327	1.209	1.047	-1.407	0.645	2.299	0.326	1.641	3.082	-0.901	2.44	2.006	0.241	2.163	0.826	-1.965	0.51	1.361	-2.146	0.67	-0.253	-0.877	-0.261	-0.099	0.306	-0.709	-1.45	0.804	-1.128	0.541	-0.12	0.175	0.596	1.061	-0.627	-2.147	-0.063	-2.152	-1.548
1.747	-0.704	0.691	0.458	0.379	-0.958	-2.083	0.29	0.004	1.835	-0.36	1.332	1.619	-1.022	-0.049	2.44	-1.038	1.971	0.787	-0.258	1.846	2.302	0.65	1.162	1.004	-1.913	0.047	2.681	-1.263	-0.4	1.046	-0.155	-1.16	-0.16	0.803	-0.674	-1.398	-0.053	-0.291	-0.482	1.553	-1.475	0.105	1.462	0.232	-1.62	-0.828	-1.073	-2.663	0.661
-0.851	-0.068	-2.37	0.246	-0.244	0.034	0.659	0.209	2.344	-1.388	0.223	-2.77	-0.297	-0.368	-1.851	-1.125	0.166	-3.818	-1.592	1.298	-2.664	-2.294	-0.282	-2.57	0.729	0.029	-2.159	-0.178	-1.432	-2.051	-0.385	-0.01	-0.309	0.869	-0.482	0.375	0.796	-0.451	1.933	1.73	0.129	0.037	1.109	-1.416	0.031	0.011	-1.14	2.18	0.526	0.838
-1.846	-1.843	-0.509	-0.01	0.011	-0.091	1.846	1.835	0.549	-2.553	-1.972	-0.466	-1.064	-1.628	-0.539	-2.708	-3.085	-0.548	-3.048	-1.377	-1.269	-3.147	-1.645	0.413	-0.637	-1.838	-1.536	-0.601	-2.299	0.25	-0.766	-0.116	-0.266	0.742	0.14	0.069	1.087	1.668	0.343	1.312	-0.287	-0.735	1.005	-0.457	0.984	0.961	2.218	-0.606	2.527	1.913
1.641	-1.221	1.08	-0.095	0.026	0.051	-1.604	1.198	-1.101	1.822	-1.873	0.816	1.386	-0.478	1.305	2.604	-1.739	0.048	0.929	-2.447	0.469	2.344	-2.52	1.535	2.33	0.054	1.564	0.88	-0.544	2.267	0.548	0.347	0.293	-0.732	-0.297	-0.187	-1.484	0.389	-1.237	-1.416	-0.338	0.677	-0.481	-1.335	-0.6	-0.923	0.362	-2.219	-1.686	1.916
-1	0.679	2.041	-0.302	0.669	-0.5	1.243	-1.213	-1.62	-1.561	0.872	2.459	-0.43	0.505	1.508	-2.36	0.102	2.252	-1.739	1.973	2.505	-1.236	0.535	3.476	-0.191	-0.63	1.594	0.418	1.171	1.737	-0.85	0.746	0.057	0.294	0.487	-0.978	0.742	-0.96	-1.022	1.071	1.21	-0.73	-0.08	0.837	-1.984	1.286	-1.181	-0.048	1.679	-1.358
0.189	-0.123	-2.333	0.456	-0.87	0.281	-0.573	0.839	2.094	0.597	0.064	-2.93	-0.209	-0.348	-1.633	-0.026	0.283	-3.797	1.2	-0.855	-3.153	1.316	0.849	-2.794	-0.992	-1.068	-1.911	-0.68	0.63	-1.227	0.713	-0.893	-0.461	0.133	-0.749	0.965	-0.063	0.718	1.459	0.803	-1.066	1.853	-0.842	-1.326	1.051	0.857	1.299	1.505	-1.023	0.88
-0.305	0.952	-1.957	-0.206	0.49	0.533	0.475	-1.46	1.5	-0.549	1.539	-2.309	-0.011	0.336	-1.491	-1.463	1.938	-1.891	-0.853	1.231	-3.354	0.117	2.372	-2.443	0.901	-0.01	-1.931	-0.831	-0.426	-1.533	0.221	0.753	-0.039	-0.62	0.112	1.029	-0.271	-1.32	1.218	-1.685	0.253	0.764	-0.512	0.561	2.031	-0.945	-1.833	1.944	1.153	-1.513
-1.834	0.652	1.38	-0.217	-0.412	-0.231	1.935	-0.415	-1.238	-1.906	1.226	1.824	-1.696	0.061	0.853	-2.835	1.062	2.478	-2.076	2.188	1.261	-1.016	1.332	2.449	-2.569	-0.26	0.215	-1.447	-0.843	1.488	-0.537	0.251	-0.042	0.09	-1.07	-0.424	1.268	-0.915	-1.37	-0.711	-1.822	-0.771	0.506	-1.547	0.499	1.74	-1.916	-1.628	2.495	0.023
-0.352	-2.143	1.003	-0.453	0.129	0.22	0.6	2.019	-1.157	-0.033	-2.719	0.642	-0.72	-1.489	1.322	-0.58	-3.175	-0.182	0.199	-3.425	1.428	0.932	-2.293	0.328	-0.069	-1.035	2.112	-1.659	-1.73	1.826	-1.065	-0.32	0.368	0.149	0.571	0.062	-0.073	1.814	-0.774	1.056	-0.021	-0.328	0.54	1	0.991	-0.849	1.604	-1.571	1.241	2.143
-0.093	2.125	-0.983	-0.878	-0.116	0.12	0.855	-2.02	0.878	-0.234	2.563	-1.575	0.002	1.595	-0.364	0.448	3.403	-1.523	-1.307	2.853	-1.588	-0.048	2.029	-2.518	-0.107	2.124	0.68	1.1	1.303	-0.282	-0.992	0.416	-0.436	-0.63	-0.616	0.662	0.714	-1.374	0.42	-1.439	-1.426	0.697	-0.638	-0.038	1.651	0.717	-1.638	-0.67	0.914	-2.603
-0.84	2.221	-0.232	0.269	0.012	0.4	0.718	-2.23	-0.046	-1.097	2.563	-0.802	-0.526	1.776	0.343	-1.979	2.029	-1.159	-0.334	2.653	-1.581	-1.437	3.588	-0.403	-1.374	1.661	1.086	0.25	2.403	0.832	0.021	0.46	-0.154	0.524	-0.436	0.954	1.211	-1.708	0.355	-0.287	-0.742	1.667	1.317	0.066	1.501	2.072	-1.308	-0.279	0.231	-2.648
1.122	1.081	1.666	-0.375	0.346	0.032	-0.876	-1.264	-1.706	1.856	0.898	1.724	0.299	1.213	1.56	2.353	0.962	0.704	2.059	-0.105	2.181	2.239	1.644	2.434	0.126	2.202	1.049	-0.116	1.317	2.544	-0.472	0.209	0.76	-0.267	0.488	-0.702	-1.069	-0.474	-1.741	0.798	0.355	-1.022	-0.567	1.574	-0.906	-2.177	-0.63	-1.508	-0.653	-1.933
1.817	-0.099	-1.253	-0.206	0.905	0.163	-1.592	-0.701	1.229	2.041	-0.159	-1.966	1.505	-0.023	-0.499	2.822	-0.945	-2.061	2.516	0.834	-2.24	1.145	-0.34	-2.636	2.206	0.614	-0.001	1.439	-0.855	0.188	0.163	0.737	-0.487	-0.523	0.963	0.869	-1.028	-0.282	1.656	-1.474	1.515	0.631	0.102	1.566	1.506	-0.168	-0.908	1.954	-2.09	-1.044
-0.621	0.085	2.317	-0.424	-0.038	-0.233	0.848	-0.026	-2.203	-0.292	0.361	2.911	-0.946	-0.184	1.623	0.79	0.212	2.891	-0.657	-0.017	3.882	-0.413	1.434	2.783	-2.077	-0.018	1.588	-0.797	-1.275	1.636	-0.334	0.447	0.316	-0.52	-0.502	-0.801	0.055	-0.128	-2.154	-1.569	-0.831	-0.884	-0.043	-1.428	-0.491	-0.179	-1.038	-2.808	1.556	0.067
0.164	-1.854	1.55	0.459	-0.139	-0.354	-0.451	1.899	-1.33	-0.123	-1.891	2.202	0.478	-1.735	0.814	0.195	-2.831	2.713	-1.266	-1.874	2.309	0.153	-1.041	2.874	-0.076	-2.349	0.15	1.504	-2.159	0.696	0.59	-0.24	0.399	0.319	-0.049	-1.1	0.188	1.451	-1.538	-0.665	-0.463	-1.307	1.093	-0.595	-1.736	1.191	1.96	-1.359	-1.039	2.228
0.091	0.674	2.589	-0.123	0.021	-0.042	-0.041	-0.717	-2.581	0.43	1.072	3.077	-0.257	0.259	1.971	1.537	0.908	3.001	0.132	0.684	4.103	0.32	2.162	3.05	-1.285	0.6	2.035	-0.144	-0.773	2.308	0.273	0.38	0.488	-0.52	-0.351	-0.575	0.232	-0.291	-1.942	-1.437	0.195	-0.625	-0.703	-1.369	-0.216	0.274	0.802	-2.234	-0.34	-1.128
-2.598	0.414	0.323	0.022	0.019	-0.133	2.568	-0.387	-0.23	-3.11	0.914	0.358	-1.982	-0.088	0.247	-2.957	1.681	1.107	-4.014	0.303	0.625	-3.242	1.58	-0.53	-2.242	-0.941	-0.391	-1.781	-0.524	1.3	-0.564	0.476	-0.266	0.61	-0.436	0.001	1.94	0.17	-0.293	0.383	-1.4	-0.604	0.586	-0.714	1.083	2.017	0.463	-1.357	3.083	-0.915
-0.698	-1.817	1.34	0.159	-0.328	-0.159	0.622	2.002	-1.285	-0.804	-1.601	2.028	-0.519	-1.992	0.555	0.231	-1.447	2.515	-1.417	-2.368	2.561	-1.462	-0.667	2.105	-1.557	-2.045	0.09	-0.155	-3.048	0.591	0.459	-1.039	-0.134	-0.14	0.366	-0.193	0.806	1.251	-1.108	-0.311	0.816	0.801	-1.167	0.392	-0.623	1.783	1.194	-0.537	0.404	2.667
-0.177	1.6	1.836	0.317	-0.233	0.051	-0.001	-1.439	-1.889	-0.758	1.888	2.19	0.396	1.264	1.391	-0.327	1.888	3.252	-1.656	1.242	2.271	-1.058	2.837	1.89	1.099	0.564	1.869	1.144	2.043	0.977	-0.196	0.314	0.266	0.851	-0.775	-0.162	0.189	-1.76	-1.196	1.055	-1.478	0.674	1.707	-0.239	-0.583	0.893	-2.67	-1.22	-0.144	-1.099
0.779	2.004	-1.11	0.21	-0.216	-0.406	-0.925	-1.873	1.334	0.615	2.56	-0.665	0.963	1.347	-1.554	1.134	3.419	-0.876	0.843	2.338	0.375	-0.579	2.677	-0.733	1.995	1.434	-1.893	0.266	1.343	-2.444	0.805	-0.112	-0.916	-0.386	-0.322	0.099	-0.552	-1.786	0.607	-1.324	0.098	-0.436	-0.025	0.249	0.972	-0.852	-2.411	-0.213	-1.294	-1.892
2.24	-0.588	0.418	0.105	0.325	-0.814	-2.278	0.309	0.266	2.856	-0.252	0.634	1.533	-0.879	0.135	3.26	-0.902	1.434	2.715	0.722	1.069	3.605	-0.242	-0.174	0.869	-1.181	0.908	1.837	-1.865	-0.354	0.693	-0.206	-0.957	-0.471	0.787	-0.556	-1.561	-0.047	0.081	-0.971	1.245	-1.441	-0.192	1.658	0.031	-1.764	-0.863	-0.605	-2.88	0.69
-0.034	0.543	-2.444	0.32	-0.234	0.066	-0.186	-0.412	2.384	-0.542	0.697	-2.947	0.455	0.364	-1.831	-0.001	1.128	-3.79	-1.352	1.37	-2.599	-0.982	-0.223	-3.378	1.25	1.209	-1.602	1.135	-0.474	-2.167	-0.212	-0.005	-0.471	0.845	-0.48	0.61	0.225	-0.954	1.903	1.617	0.401	0.85	1.459	-1.296	0.112	-0.476	-1.871	1.707	-0.535	0.129
-2.09	-1.321	-1.085	0.049	0.032	-0.128	2.085	1.302	1.138	-2.422	-1.58	-1.692	-1.66	-1.008	-0.459	-3.346	-2.091	-1.358	-1.737	-2.272	-2.253	-2.74	-0.641	-2.315	-1.404	-1.853	0.211	-2.386	-0.382	0.067	-0.3	-0.187	-0.772	0.415	0.27	0.512	1.664	1.153	0.463	0.58	-0.68	1.13	-0.401	0.832	1.12	2.353	0.736	-0.315	2.415	1.385
1.132	-0.824	1.893	-0.066	-0.011	0.002	-1.02	0.824	-1.918	1.579	-1.401	1.876	0.663	-0.184	1.83	2.589	-1.136	1.584	1.15	-2.16	1.194	1.594	-1.816	2.958	0.905	0.656	2.489	-0.311	-0.429	2.205	0.327	0.424	0.452	-0.443	-0.449	-0.463	-0.612	0.129	-1.893	-1.423	-0.656	-0.023	0.113	-1.395	-0.513	0.415	0.251	-2.334	-1.386	1.45
-1.626	0.826	1.398	-0.544	-0.118	-0.749	2.103	-0.703	-0.751	-2.291	0.885	1.701	-0.936	0.722	1.017	-2.722	-0.088	2.041	-2.958	1.313	0.945	-2.119	1.544	2.61	-0.144	0.164	1.559	-0.483	1.722	0.758	-1.105	-0.093	-0.255	0.107	-0.121	-1.133	1.399	-0.571	-0.363	0.3	0.913	-1.531	-0.173	-0.848	-1.932	1.686	0.193	0.402	2.699	-0.798
-0.461	-0.316	-2.264	0.165	-0.87	0.231	0.342	1.065	2.006	-0.381	-0.563	-2.949	-0.49	-0.092	-1.494	-1.169	-0.034	-3.528	-0.575	-1.662	-2.915	0.614	-0.395	-3.314	-1.581	-0.132	-1.229	-0.185	0.934	-1.341	0.255	-1.014	-0.503	0.055	-0.604	0.924	0.58	0.773	1.284	0.636	-1.352	1.616	-1.01	-0.507	1.12	1.741	0.777	1.265	0.088	1.264
0.362	0.838	-1.694	0.454	0.598	0.668	-0.709	-1.382	1.132	-0.06	1.333	-1.997	0.836	0.329	-1.287	-1.135	1.26	-1.577	-0.171	1.02	-3.075	0.27	2.392	-1.913	1.797	0.376	-1.795	0.439	-0.698	-1.346	1.072	0.554	0.21	-0.214	0.559	1.042	-1.075	-0.746	0.876	-0.994	1.267	0.597	0.023	0.791	2.114	-2.062	-0.548	1.413	-0.318	-1.941
-1.351	1.312	1.48	-0.226	-0.402	-0.154	1.492	-1.081	-1.429	-1.257	1.959	1.809	-1.385	0.602	1.064	-2.067	2.049	2.579	-1.28	2.827	1.102	-0.33	2.069	2.328	-2.437	0.533	0.569	-1.353	-0.18	1.873	-0.25	0.31	0.079	-0.209	-1.119	-0.398	0.766	-1.332	-1.597	-1.218	-1.401	-0.7	0.174	-1.714	0.438	0.756	-2.334	-1.867	2.132	-0.836
-0.24	-2.237	0.83	-0.352	-0.042	0.115	0.462	2.28	-0.865	-0.121	-2.778	0.367	-0.391	-1.605	1.291	-0.853	-2.942	-0.479	-0.005	-3.72	0.913	0.853	-2.598	-0.162	0.407	-1.291	1.925	-1.244	-1.719	1.987	-0.943	-0.443	0.446	0.245	0.372	-0.211	-0.166	1.767	-0.844	0.792	-0.283	-0.857	0.928	0.63	0.652	-0.427	1.523	-1.938	1.062	2.694
0.243	1.996	-1.119	-0.877	-0.024	-0.025	0.494	-2.014	1.132	0.207	2.436	-1.71	0.234	1.446	-0.492	1.113	2.997	-1.796	-0.602	3.223	-1.519	-0.131	1.935	-2.631	0.162	2.144	0.452	1.217	0.991	-0.536	-0.836	0.448	-0.656	-0.793	-0.492	0.607	0.388	-1.491	0.486	-1.708	-1.052	0.677	-0.701	0.12	1.51	0.326	-2.048	-0.49	0.511	-2.454
-1.223	2.08	0.082	0.064	-0.156	0.523	1.167	-1.973	-0.414	-1.147	2.758	-0.138	-1.247	1.32	0.314	-0.744	2.856	-1.165	-0.383	3.209	0.493	-2.067	3.338	-0.136	-1.979	0.718	-0.309	-1.567	1.237	1.384	0.032	0.528	0.177	0.095	-0.837	0.87	1.237	-1.741	0.358	-0.788	-1.427	0.579	0.054	-0.81	1.938	2.137	-1.205	0.598	1.047	-2.143
0.746	1.62	1.507	-0.513	0.07	0.21	-0.409	-1.638	-1.541	1.401	1.824	1.232	0.022	1.341	1.763	1.349	1.931	0.15	2.23	1.139	1.392	1.692	2.758	1.71	-0.848	2.003	1.567	0.123	1.163	2.94	-0.303	-0.015	0.974	-0.719	0.166	-0.531	-1.006	-1.249	-1.129	0.037	0.693	-1.186	-1.746	0.67	-0.586	-1.465	-1.92	-0.449	0.188	-1.934
1.727	-0.999	-0.722	0.19	0.899	0.123	-1.932	0.199	0.749	2.315	-1.104	-1.122	1.07	-0.808	-0.287	2.521	-2.194	-1.171	3.145	-0.575	-0.771	2.144	-0.758	-2.187	1.405	-1.014	0.747	0.249	-1.481	-0.659	0.472	0.548	-0.499	-0.135	1.109	0.773	-1.411	0.377	1.335	-0.374	2.188	0.587	0.572	1.213	1.635	-1.054	-0.537	1.85	-2.368	0.057
-1.695	1.372	1.12	-0.193	-0.357	-0.182	1.814	-1.162	-1.029	-1.752	2.054	1.385	-1.561	0.621	0.793	-0.826	2.461	1.854	-2.6	2.113	2.099	-1.926	2.782	0.594	-2.415	0.338	0.142	-1.636	-0.012	1.656	-0.247	0.349	0.085	-0.13	-1.065	-0.461	1.066	-1.211	-1.411	-1.065	-1.258	-1.124	-0.136	-1.773	0.374	1.095	-2.186	-1.921	2.446	-1.103
-0.152	-1.898	1.647	0.26	-0.09	-0.203	0	1.958	-1.477	-0.046	-2.015	2.37	-0.227	-1.697	0.859	-0.264	-3.099	2.544	-0.894	-1.585	2.894	0.965	-1.705	2.783	-1.263	-1.715	0.541	0.328	-2.394	0.231	0.2	-0.23	0.574	0.306	0.045	-0.968	0.677	1.498	-1.341	-0.572	-0.32	-1.508	1.095	-0.572	-1.314	1.442	1.896	-0.658	-0.651	2.327
-0.719	0.365	2.456	-0.052	0.291	-0.101	0.752	-0.559	-2.403	-0.465	0.364	3.14	-0.93	0.374	1.664	0.077	-0.546	3.314	-1.345	0.448	3.805	0.229	1.194	3.343	-1.653	1.253	1.541	-1.422	-0.621	1.553	0.193	0.449	0.589	-0.295	0.13	-0.812	0.924	-0.175	-1.699	-0.992	0.907	-1.152	-0.902	-0.799	-0.646	1.392	0.746	-2.012	0.528	-0.914
-2.472	0.704	0.446	0.013	0	0.011	2.397	-0.697	-0.5	-2.976	1.223	0.367	-1.88	0.181	0.505	-2.553	2.12	0.89	-3.952	0.925	0.86	-3.121	1.429	-0.682	-2.115	-0.783	-0.12	-1.671	-0.134	1.517	-0.489	0.57	-0.041	0.515	-0.57	0.048	1.835	-0.124	-0.579	0.16	-1.501	-0.474	0.644	-0.893	1.132	1.803	0.246	-1.595	2.831	-1.26
0.143	-1.453	1.896	-0.049	-0.361	-0.2	-0.099	1.696	-1.794	0.442	-1.107	2.46	-0.162	-1.765	1.227	1.561	-1.176	2.302	0.037	-1.699	3.28	0.222	-0.064	2.752	-1.282	-1.952	1.252	0.239	-2.777	1.153	0.248	-1.075	-0.081	-0.347	0.355	-0.328	0.203	0.968	-1.582	-0.053	0.838	0.59	-1.51	0.322	-0.45	1.313	1.037	-1.557	-0.394	2.345
-0.198	1.688	1.726	0.129	-0.464	0.276	0.162	-1.375	-1.951	-0.692	2.199	1.869	0.301	1.087	1.492	-0.311	2.679	2.746	-1.615	1.779	2.242	-0.88	2.997	1.131	0.539	0.641	2.466	1.223	1.419	1.119	-0.413	0.076	0.521	0.687	-0.98	0.022	0.207	-1.754	-1.23	0.812	-1.668	0.861	1.576	-0.462	-0.257	0.931	-2.522	-1.308	0.145	-0.984
1.421	1.826	-0.663	0.063	-0.166	-0.432	-1.384	-1.775	0.915	1.573	2.24	-0.075	1.215	1.279	-1.285	2.031	3.225	-0.323	2.394	1.768	0.568	0.746	2.451	0.638	2.125	1.345	-1.932	0.463	1.923	-1.858	0.669	-0.101	-0.905	-0.505	-0.225	0.037	-0.708	-1.668	0.497	-1.44	0.127	-0.445	-0.429	0.449	0.947	-0.875	-2.196	-0.528	-1.983	-1.816
1.723	-0.326	-1.089	-0.267	-1.004	-0.029	-1.404	1.128	1.174	1.649	0.12	-1.687	1.726	-0.825	-0.435	2.571	0.493	-1.998	0.968	0.908	-1.425	1.208	-0.434	-2.54	2.269	-0.321	0.395	2.439	-1.656	-0.532	0.392	-1.419	-0.018	-0.84	-0.484	0.001	-0.836	0.565	1.209	-1.738	-1.185	0.122	-1.048	0.072	-0.97	-0.983	-0.045	2.096	-1.929	1.6
-0.979	0.607	-2.168	0.315	-0.283	-0.078	0.769	-0.424	2.202	-1.583	0.947	-2.334	-0.343	0.227	-1.913	-1.532	1.161	-3.406	-1.63	1.856	-1.807	-2.491	0.359	-2.114	0.576	0.89	-2.1	-0.197	-0.765	-2.464	-0.348	-0.031	-0.365	0.975	-0.532	0.201	0.893	-0.995	1.681	1.86	0.263	0.17	1.298	-1.384	-0.457	0.119	-1.821	1.692	0.655	0.145
-2.039	-0.513	-1.666	0.05	0.13	-0.046	2.02	0.428	1.689	-2.218	-0.764	-2.309	-1.743	-0.251	-0.972	-3.299	-1.027	-2.25	-1.66	-1.657	-2.624	-2.285	0.059	-3.053	-2.311	-0.859	-0.205	-2.045	0.781	-0.811	-0.177	-0.15	-0.733	0.28	0.397	0.646	1.777	0.273	0.938	-0.233	-0.181	1.421	-0.094	1.443	0.767	2.038	-0.845	0.789	2.157	0.601
1.959	0.057	1.193	-0.157	0	0.117	-1.88	-0.09	-1.287	2.353	-0.558	1.261	1.475	0.7	1.048	3.11	-0.713	0.411	1.74	-1.441	1.302	2.895	-0.501	2.266	2.101	1.548	0.873	1.027	1.048	2.034	0.393	0.492	-0.038	-0.713	-0.507	0.267	-1.516	-0.753	-0.978	-1.34	-0.16	1.166	-0.076	-1.364	0.533	-0.87	-1.247	-1.732	-2.182	0.539
-1.077	1.736	1.022	-0.006	-0.536	0.687	1.142	-1.242	-1.609	-1.504	2.049	1.534	-0.595	1.325	0.506	-1.023	2.048	2.526	-2.485	1.611	1.569	-1.664	3.134	1.257	0.312	1.891	0.265	-1.158	1.175	-0.471	-0.08	0.063	1.14	0.105	-1.032	0.133	1.058	-0.662	-1.027	-0.952	-1.303	-0.214	0.466	-1.948	0.669	0.639	0.129	-1.696	1.173	-1.806
-0.61	0.182	-2.303	-0.357	-0.778	0.147	0.861	0.501	2.208	-0.768	-0.038	-2.966	-0.445	0.365	-1.528	-1.006	0.777	-3.686	-1.523	-0.833	-3.084	0.136	-0.49	-3.373	-1.27	0.954	-1.168	0.53	0.931	-1.549	-0.304	-0.832	-0.645	-0.359	-0.593	0.922	0.81	0.185	1.439	-0.34	-1.548	1.424	-1.337	-0.165	1.048	1.753	-0.39	1.278	0.819	0.732
0.593	0.998	-1.488	-0.914	0.498	0.201	0.198	-1.378	1.267	0.425	0.725	-2.175	0.716	1.293	-0.71	0.71	-0.426	-2.138	0.909	1.184	-2.985	-0.717	0.738	-2.225	1.03	2.317	-0.951	1.578	0.927	-0.232	-0.525	1.183	0.192	-1.167	-0.239	0.166	-0.146	-1.381	0.514	-1.75	-0.398	-0.762	-1.944	-0.387	0.897	-0.641	-2.417	0.376	0.459	-1.315
-1.365	1.092	1.62	-0.322	-0.074	-0.517	1.611	-1.02	-1.292	-1.161	1.459	2.247	-1.524	0.706	0.897	-2.096	1.54	2.811	-0.687	2.342	1.908	-0.389	0.881	2.794	-2.398	1.215	0.481	-1.805	-0.298	1.237	-0.393	0.574	-0.067	-0.236	-0.724	-0.964	1.032	-0.823	-1.769	-1.176	-0.648	-1.616	-0.443	-1.633	-0.377	0.826	-1.717	-2.477	2.107	-1.192
-0.833	-1.534	1.814	-0.211	-0.178	-0.163	0.967	1.649	-1.72	-0.356	-1.85	2.247	-1.305	-1.178	1.269	-0.146	-2.848	2.059	-0.798	-1.87	3.272	0.608	-1.349	2.321	-1.671	-0.251	1.688	-2.202	-1.826	1.081	-0.691	-0.828	-0.166	0.264	0.48	-0.161	0.699	0.899	-1.58	1.148	0.327	0.422	-0.325	1.235	0.425	1.454	0.148	-1.881	1.205	2.325
-0.643	2.121	-1.028	-0.768	-0.249	0.317	1.298	-1.882	0.749	-0.927	2.496	-1.567	-0.39	1.672	-0.421	-0.385	3.443	-1.773	-1.994	2.587	-1.613	-0.816	1.76	-2.411	-0.407	2.251	0.469	0.746	1.447	-0.614	-1.086	0.3	-0.201	-0.33	-0.753	0.776	0.934	-1.362	0.247	-1.126	-1.531	1.081	-0.063	-0.249	1.686	0.711	-1.909	-0.729	1.571	-2.357
-1.141	1.24	1.534	-0.202	-0.443	0.126	1.247	-0.986	-1.598	-1.283	1.924	1.308	-0.949	0.459	1.71	-1.953	1.895	0.453	-0.363	2.552	1.17	-1.759	2.512	2.115	-1.875	-0.146	1.873	-0.368	0.525	2.663	0.088	-0.25	0.811	-0.484	-0.626	-0.549	0.508	-1.332	-1.461	-0.908	0.298	-1.057	-1.408	-1.408	-0.483	0.714	-2.405	-1.158	1.883	-0.634
-0.442	2.051	0.605	0.375	-0.039	0.397	0.242	-2.044	-0.891	-1.125	2.186	0.394	0.309	1.828	0.791	-1.774	1.719	1.143	-1.368	1.916	-0.604	-1.19	3.271	0.459	0.372	1.717	1.867	0.962	2.684	0.45	0.796	0.548	0.195	-0.041	-0.628	0.57	0.39	-1.962	-0.048	-1.15	-0.454	0.376	-0.028	-0.838	1.744	1.419	-2.333	0.202	0.1	-2.054
1.909	-0.571	-0.933	-0.071	0.976	-0.115	-1.838	-0.227	1.079	2.327	-0.747	-1.499	1.405	-0.328	-0.368	3.011	-1.523	-1.046	2.899	0.187	-1.837	1.858	-1.203	-2.389	1.98	0.09	0.53	0.819	-1.199	0.085	0.31	0.646	-0.705	-0.432	1.178	0.533	-1.22	0.155	1.446	-1.188	1.956	0.265	0.334	1.727	1.185	-0.525	-0.687	1.773	-2.384	-0.524
-0.687	2.329	0.385	-0.303	-0.263	0.16	0.851	-2.143	-0.54	-0.373	2.992	0.223	-0.958	1.566	0.533	0.562	2.996	0.852	-1.109	3.81	0.506	-0.199	3.173	-0.854	-1.887	1.418	-0.005	-1.316	1.452	1.585	0.032	0.426	0.159	-0.651	-0.936	0.153	0.065	-2.06	-0.7	-1.67	-0.862	-0.323	-0.591	-1.43	1.184	-0.403	-3.035	-0.472	1.547	-2.166
0.531	-2.117	1.051	0.312	0.032	-0.384	-0.682	2.076	-0.825	0.604	-2.347	1.742	0.454	-1.805	0.316	0.623	-3.481	1.782	-0.194	-1.799	2.282	1.546	-1.983	2.219	-0.523	-2.179	-0.202	1.25	-2.121	-0.291	0.36	-0.276	0.326	0.288	0.332	-1.098	0.067	1.847	-1.063	-0.639	-0.123	-1.667	1.161	0.063	-1.614	0.872	2.357	-0.408	-1.378	2.223
-0.255	1.743	1.845	0.339	-0.023	0.078	0.008	-1.777	-1.904	-0.581	1.783	2.49	0.118	1.595	1.136	-1.678	1.505	2.549	-0.517	2.894	2.67	-0.037	1.319	3.285	0.98	2.251	1.134	-0.571	2.019	0.33	0.421	0.117	0.841	0.225	-0.171	-0.686	-0.01	-1.662	-1.103	1.125	0.208	-1.168	-0.619	0.434	-1.164	0.771	-2.357	-0.633	0.04	-1.813
-1.908	-1.839	0	0.067	-0.034	0.049	1.859	1.845	-0.035	-2.298	-2.222	-0.463	-1.423	-1.386	0.459	-3.263	-1.739	-0.825	-2.634	-3.161	-0.106	-1.739	-2.53	-1.417	-0.952	-1.905	1.367	-2.083	-0.686	1.044	-0.422	-0.492	-0.361	0.541	0.42	0.456	1.39	1.305	-0.435	1.164	-0.141	1.233	-0.125	1.076	0.989	1.964	0.669	-1.125	2.253	2.307
0.854	-1.845	1.277	-0.387	-0.146	0.117	-0.622	1.966	-1.331	1.511	-2.038	1.076	0.111	-1.572	1.417	1.445	-2.766	0.197	1.777	-2.765	1.905	2.266	-1.245	1.025	0.318	-0.905	2.259	-0.504	-2.487	1.716	-0.699	-0.794	0.34	-0.074	0.502	-0.091	-0.988	1.362	-0.954	0.804	0.315	-0.717	0.219	1.146	0.832	-1.424	0.734	-1.804	-0.235	2.487
0.099	1.577	1.8	-0.371	-0.265	0.021	0.146	-1.404	-1.818	0.374	2.238	1.903	-0.164	0.842	1.606	0.291	2.415	2.998	-0.305	2.981	1.417	1.418	2.443	1.465	-1.249	0.848	1.846	0.206	0.069	2.379	0.102	0.317	0.175	-0.854	-0.842	-0.142	-0.603	-1.222	-1.578	-1.947	-0.524	0.168	-0.563	-1.72	0.423	-1.381	-2.01	-1.877	0.844	-1.552
-0.485	0.736	-2.26	0.046	-0.206	-0.135	0.475	-0.619	2.331	-0.368	1.432	-2.421	-0.558	-0.046	-2.006	-1.045	1.638	-3.332	0.718	1.726	-2.615	-0.649	2.148	-1.668	-0.305	-0.657	-2.93	-1.676	-0.168	-1.859	0.235	-0.48	-0.822	-0.138	0.087	0.538	0.698	-0.644	1.538	-1.195	-0.235	0.759	-0.032	1.155	0.735	0.728	-1.744	1.222	0.221	-0.565
1	-1.927	-0.144	-0.545	-0.135	-0.713	-0.595	2.017	0.802	1.585	-2.105	-0.539	0.321	-1.69	0.234	2.266	-2.649	0.122	2.07	-1.168	-0.872	1.466	-2.734	-1.467	0.568	-1.096	1.255	-0.253	-2.678	0.453	-0.671	-0.904	-0.617	-0.374	0.638	-0.679	-0.704	1.237	0.698	-1.028	1.014	-1.466	0.681	0.828	-1.044	-1.786	1.002	0.95	-0.479	2.717
-1.28	0.962	-2.074	-0.072	0.001	0.055	1.312	-0.977	2.06	-1.715	0.773	-2.611	-0.788	1.074	-1.451	-1.914	1.791	-3.094	-2.691	0.349	-2.182	-1.256	0.103	-3.379	-1.347	1.946	-0.915	0.115	1.539	-1.833	-0.559	-0.162	-0.548	0.404	0.172	0.651	0.684	-1.104	1.555	0.037	0.92	1.323	1.323	0.555	0.214	-0.245	-1.418	2.1	1.871	-0.788
-1.043	-0.523	-2.378	-0.086	-0.105	0.048	1.051	0.568	2.337	-0.82	-0.553	-3.082	-1.226	-0.47	-1.593	-1.712	-0.772	-3.651	-0.111	-1.349	-3.34	-0.364	0.449	-3.247	-1.474	-1.451	-1.235	-2.036	0.243	-1.384	0.007	-0.104	-0.711	-0.179	-0.108	0.795	1.102	0.218	1.608	-0.654	-1.012	1.162	-0.893	0.688	1.111	1.878	-0.578	1.689	0.916	0.87
2.147	-0.895	0.876	-0.171	0.314	0.298	-2.005	0.685	-1.046	2.529	-1.494	0.805	1.681	-0.265	0.919	2.848	-1.758	-0.21	1.897	-2.327	1.241	3.395	-1.397	1.446	2.19	0.576	0.357	1.42	0.068	1.878	0.255	-0.304	0.215	-0.59	0.929	0.384	-2.006	0.816	-0.246	-0.011	1.643	-0.223	-0.723	1.251	1.427	-2.54	0.013	0.299	-1.929	0.564
-2.038	0.033	-1.191	-0.017	0.815	0.292	2.03	-0.7	0.856	-2.668	0.265	-1.425	-1.327	-0.133	-0.899	-2.477	1.109	-2.128	-3.378	0.377	-0.591	-3.102	-0.602	-2.038	-0.78	-0.577	-1.794	-1.438	-0.931	-0.1	-0.506	1.026	-0.275	0.467	0.501	0.776	1.558	-0.456	0.283	-0.002	-0.194	1.564	1.002	1.334	1.313	1.113	-1.328	-0.161	2.41	-0.886
0.189	0.769	-2.216	-0.771	-0.189	0.009	0.518	-0.666	2.183	0.002	0.816	-2.922	0.335	0.662	-1.433	0.895	1.2	-3.408	-0.816	1.479	-3.086	-0.334	-0.124	-3.349	0.26	1.655	-0.914	1.42	0.344	-1.229	-0.685	-0.295	-0.749	-0.724	-0.081	0.761	0.413	-0.858	1.394	-1.711	-0.439	1.166	-0.619	1.03	1.057	0.129	-1.935	1.402	0.558	-0.454
0.978	1.168	-1.284	-0.694	0.563	0.238	-0.372	-1.636	1.105	0.831	1.247	-1.96	1.067	1.103	-0.499	0.467	0.322	-2.432	1.835	1.355	-2.402	0.09	1.996	-2.359	1.654	1.898	-0.164	1.55	0.11	-0.368	-0.193	1.114	0.349	-1.091	-0.067	0.097	-0.537	-1.483	0.342	-1.335	-0.088	-1.012	-1.953	0.12	0.749	-1.306	-2.229	-0.039	-0.244	-1.714
-0.977	1.944	1.284	-0.208	-0.084	-0.228	1.1	-1.897	-1.09	-0.752	2.548	1.634	-1.139	1.255	0.905	-1.653	2.906	2.149	-0.605	3.336	0.813	0.154	2.331	2.2	-1.739	1.542	0.016	-1.801	0.631	1.598	0.012	0.411	0.304	-0.439	-0.589	-0.763	0.663	-1.321	-1.483	-0.911	0.05	-1.622	-1.09	-1.314	-0.283	0.232	-1.845	-2.397	1.451	-2.394
0.385	-2.037	1.262	-0.117	-0.283	-0.229	-0.287	2.209	-1.08	0.923	-2.03	1.75	-0.165	-1.989	0.701	1.798	-2.351	1.165	0.689	-2.76	2.52	1.171	-1.066	2.228	-1.187	-1.69	1.115	-0.421	-2.975	0.161	0.203	-0.972	-0.359	-0.418	0.42	-0.087	0.117	1.52	-1.025	-0.145	0.601	0.986	-1.579	0.272	-0.192	1.14	1.849	-0.702	-0.701	2.782
-1.091	0.882	-1.913	-0.14	0.636	0.548	1.199	-1.445	1.413	-1.643	1.179	-2.293	-0.516	0.57	-1.411	-1.353	1.134	-3.36	-1.753	2.246	-1.976	-2.569	0.671	-2.191	0.452	1.034	-1.727	-0.49	-0.51	-1.761	-0.696	0.821	0.061	0.44	0.356	0.937	0.545	-1.181	0.997	0.116	0.684	1.963	1.473	0.77	0.683	-0.247	-1.787	1.576	1.799	-1.613
-1.599	0.525	1.656	-0.157	0.041	-0.178	1.66	-0.541	-1.549	-1.407	0.802	2.306	-1.742	0.201	0.924	-0.873	1.731	2.029	-0.768	0.051	2.861	-2.285	0.928	2.992	-2.127	1.057	0.278	-2.528	-0.579	1.081	-0.655	-0.481	0.086	0.321	0.549	-0.458	1.139	0.057	-1.659	1.056	1.068	0.228	-0.22	1.498	-0.807	0.415	-0.299	-2.4	2.104	-1.063
-0.956	0.73	2.277	-0.06	0.286	-0.105	1.016	-0.886	-2.221	-0.758	0.979	2.923	-1.103	0.487	1.517	-0.137	1.916	3.009	-0.326	0.149	3.448	-1.629	1.155	3.475	-2.091	0.976	1.279	-1.201	-0.62	1.523	0.007	0.824	0.471	-0.115	-0.254	-0.68	0.984	-0.243	-1.688	-1.066	-0.107	-1.245	-0.15	-1.314	-0.334	0.96	0.551	-2.39	0.991	-1.476
0.715	-1.143	-1.633	0.426	1.003	-0.098	-0.929	0.282	1.801	0.495	-1.333	-2.306	0.919	-0.862	-0.895	0.719	-2.429	-2.42	1.053	-0.751	-3.134	-0.568	-1.299	-2.429	2.015	-0.711	-0.811	0.556	-1.609	-0.149	0.444	0.555	-0.782	0.433	1.299	0.646	-0.138	0.486	1.809	-0.29	2.123	0.552	1.394	1.788	0.854	0.375	-0.481	1.929	-1.633	0.138
-1.091	2.168	-0.047	-0.244	-0.297	0.277	1.19	-1.986	-0.192	-0.858	2.832	-0.243	-1.281	1.401	0.155	-0.224	3.31	0.549	-1.732	3.451	-0.274	-0.291	2.833	-1.263	-2.05	1.12	-0.557	-1.671	1.35	1.242	-0.082	0.446	0.098	-0.422	-1.041	0.42	0.398	-2.037	-0.355	-1.401	-1.317	0.127	-0.391	-1.195	1.508	0.164	-3.074	-0.004	1.885	-1.875
0.353	-2.466	0.349	0.234	0.128	-0.279	-0.491	2.338	-0.172	0.327	-2.928	0.908	0.359	-1.898	-0.233	0.556	-3.937	0.492	-0.633	-2.944	1.516	1.06	-2.723	1.705	-0.379	-2.17	-1.048	1.398	-1.808	-0.653	-0.031	-0.433	0.192	0.509	0.68	-0.75	0.287	2.044	-0.198	-0.05	0.565	-1.682	1.563	0.517	-0.958	0.709	2.043	0.839	-1.219	2.523
0.489	1.616	1.868	-0.23	-0.191	0.164	-0.353	-1.48	-2.04	0.289	2.208	2.218	0.638	0.949	1.436	0.163	3.173	1.616	1.14	2.365	2.974	-0.701	2.142	2.803	0.905	0.123	2.155	1.547	1.17	0.763	-0.482	0.419	0.532	0.028	-0.79	-0.241	-0.749	-1.019	-1.498	0.059	-1.629	0.456	1.119	-0.627	-0.504	-1.669	-1.602	-1.051	0.048	-1.896
-1.847	-1.104	-1.479	0.046	0.114	-0.159	1.828	1.017	1.549	-2.124	-1.325	-2.116	-1.472	-0.838	-0.818	-2.118	-0.512	-2.872	-3.241	-1.473	-1.79	-1.604	-2.163	-2.601	-1.262	-1.667	-0.177	-2.178	-0.252	-0.231	-0.15	-0.101	-0.887	0.25	0.327	0.566	1.658	0.761	0.799	0.12	-0.552	1.253	-0.436	1.125	0.915	2.29	-0.15	0.64	1.906	1.237
0.247	-2.307	0.813	-0.33	-0.106	-0.035	-0.045	2.421	-0.762	0.895	-2.624	0.716	-0.451	-1.888	0.867	1.005	-2.896	-0.348	0.988	-3.546	1.249	1.701	-1.934	1.014	-0.634	-1.712	1.969	-1.234	-2.654	0.683	-0.783	-0.721	-0.087	0.113	0.523	0.017	-0.453	1.728	-0.705	1.094	0.304	-0.348	0.292	0.765	1.085	-0.645	1.297	-1.724	0.37	3.014
-0.857	1.972	1.234	-0.181	-0.411	0.218	0.938	-1.676	-1.358	-0.934	2.706	1.04	-0.768	1.164	1.38	-0.927	3.256	2.006	-1.861	2.861	0.416	-0.007	2.925	0.458	-1.691	0.624	1.801	0.055	1.087	2.059	-0.369	0.345	0.093	0.015	-1.155	0.343	0.333	-1.952	-0.945	-0.77	-1.778	0.978	0.989	-1.18	0.895	0.552	-3.013	-0.617	1.475	-1.373
-0.109	0.35	-2.33	0.332	-0.142	-0.158	-0.144	-0.302	2.444	-0.321	1.021	-2.483	0.139	-0.367	-2.089	-0.35	1.089	-3.537	0.469	1.733	-2.192	-1.369	1.199	-2.129	0.976	-0.707	-2.684	-0.703	-1.027	-2.152	0.775	-0.434	-0.708	-0.125	0.117	0.395	0.272	-0.487	1.789	-1.14	-0.291	0.148	-0.246	1.191	0.546	0.215	-1.57	1.656	-0.564	-0.087
0.791	-1.662	-0.824	-0.289	0.487	-0.968	-0.635	1.143	1.589	1.506	-1.743	-0.579	0.018	-1.501	-1.112	1.536	-2.692	-0.014	1.755	-0.954	0.108	2.241	-1.651	-1.38	-0.634	-1.767	-0.343	-0.255	-2.204	-1.971	-0.351	-0.082	-1.495	-0.243	0.94	-0.342	-0.711	0.546	1.061	-0.747	1.917	-0.576	0.879	1.105	-0.278	-1.791	0.407	0.882	-0.545	1.71
1.127	1.159	-1.936	-0.143	0.107	0.004	-1.027	-1.195	1.964	1.568	0.962	-2.448	0.648	1.295	-1.34	1.731	1.824	-3.151	1.006	0.199	-3.071	2.542	0.52	-2.124	-0.257	1.861	-1.691	1.067	2.122	-0.653	0.294	0.051	-0.631	-0.583	0.175	0.652	-0.816	-1.181	1.189	-1.471	0.726	0.412	0.061	0.734	1.32	-1.671	-1.658	0.618	-1.21	-1.124
-1.532	0.367	-2.175	-0.117	0.024	0.059	1.576	-0.372	2.074	-1.723	0.869	-2.673	-1.3	-0.125	-1.573	-1.993	0.275	-3.558	-0.885	1.526	-2.901	-2.578	1.473	-2.43	-0.494	-0.868	-1.97	-2.192	-0.696	-1.245	-0.552	0.53	-0.352	0.312	-0.48	0.444	1.277	0.147	1.485	0.947	-1.163	-0.105	-0.374	-1.109	1.037	2.199	0.692	1.109	1.806	-0.895
1.752	0.563	1.553	0.152	0.178	-0.461	-1.815	-0.673	-1.273	1.771	0.698	2.278	1.647	0.423	0.758	1.289	-0.12	2.852	1.349	1.697	2.493	2.878	0.694	2.402	2.084	-0.56	0.703	2.177	1.173	0.148	0.218	0.347	0.275	0.099	0.002	-1.206	-1.286	-0.226	-1.752	0.386	-1.113	-1.299	0.677	0.685	-1.793	-1.784	0.718	-2.02	-2.227	-1.082
-0.258	-0.689	-2.302	-0.75	0.457	0.102	0.906	0.307	2.217	-0.297	-0.558	-3.01	-0.252	-0.768	-1.494	0.101	0.424	-3.294	-1.345	-0.578	-3.365	0.317	-1.26	-3.66	0.802	-1.005	-1.29	-0.779	-1.638	-1.106	-0.769	0.43	-0.682	-0.608	0.426	0.873	0.823	0.585	1.457	-1.027	-0.455	1.369	-1.241	1.225	1.287	1.521	0.012	0.803	0.902	0.042
0.003	1.164	-2.167	-0.838	0.221	0.215	0.709	-1.286	1.975	-0.174	1.142	-2.871	0.125	1.158	-1.38	0.719	1.557	-3.434	-1.082	1.759	-3.096	-0.311	0.03	-3.09	0.272	2.155	-0.975	1.088	0.654	-1.218	-0.934	0.389	-0.56	-0.622	0.054	0.959	0.343	-1.187	1.239	-1.571	-0.285	1.412	-0.153	0.955	1.407	-0.277	-2.115	1.154	1.005	-1.316
0.46	1.822	0.047	-0.696	-0.058	-0.847	0.086	-1.773	0.68	1.08	2.009	-0.328	-0.266	1.557	0.407	1.877	1.261	-0.59	1.563	2.833	0.282	0.865	2.387	-1.291	-0.798	2.538	0.633	0.053	1.029	1.376	-1.079	0.568	-0.541	-0.229	-0.665	-1.038	0.561	-1.457	0.09	0.436	-0.318	-1.862	-0.787	-1.442	-1.524	1.151	-2.306	-0.308	-0.398	-2.029
-0.18	2.511	-0.212	-0.366	-0.146	-0.283	0.41	-2.413	0.381	0.285	3.078	-0.28	-0.616	1.842	-0.166	-0.394	4.027	-0.224	0.78	3.003	-1.261	0.965	3.037	0.573	-1.583	1.818	-0.787	-1.012	1.88	0.897	0.062	0.475	-0.327	-0.798	-0.769	-0.229	-0.024	-2.119	-0.254	-1.572	-0.693	-1.043	-1.408	-0.744	0.68	-0.688	-2.974	-0.469	0.766	-2.621
0.042	-1.919	1.393	0.276	-0.338	-0.36	-0.197	2.157	-1.167	-0.118	-1.715	2.044	0.25	-2.069	0.641	0.782	-1.502	2.681	-0.553	-2.557	2.529	-0.87	-0.93	2.134	-0.771	-2.353	0.091	1.048	-2.906	0.745	0.794	-0.92	-0.289	-0.239	0.253	-0.417	0.331	1.541	-1.039	-0.71	0.492	0.543	-1.04	-0.093	-1.083	1.126	1.987	-0.34	-0.725	2.677
-0.378	2.322	-0.524	-0.712	-0.154	0.626	0.93	-2.185	0.001	-0.708	2.952	-0.675	-0.094	1.602	-0.303	0.109	3.539	-1.098	-1.074	3.528	0.152	-1.503	2.804	-1.447	0.947	1.727	0.185	0.181	1.096	-1.246	-1.026	0.503	0.342	-0.326	-0.791	0.813	0.507	-1.574	-0.244	-1.042	-1.479	1.213	0.484	-0.65	1.627	-0.204	-2.01	-0.968	1.289	-2.723
-0.591	-1.697	1.283	-0.607	0.103	-0.277	1.012	1.651	-1.075	-0.107	-1.702	1.842	-1.079	-1.633	0.64	0.678	-2.433	1.53	-0.619	-2.137	2.71	0.334	-0.712	2.077	-2.106	-1.242	0.99	-1.21	-2.656	0.098	-0.711	-0.648	-0.529	-0.481	0.855	-0.015	0.217	1.767	-1.024	0.218	0.891	0.842	-1.454	1.25	0.31	-0.267	1.612	-2	1.722	1.503
-1.843	0.669	1.743	0.057	0.155	-0.002	1.795	-0.702	-1.685	-2.366	1.122	1.945	-1.233	0.228	1.48	-2.899	1.461	1.077	-1.972	2.007	2.414	-3.105	0.627	2.643	-1.653	-0.692	0.991	-0.633	-0.191	2.33	-0.286	0.756	0.366	0.401	-0.437	-0.362	1.512	-0.027	-1.213	-0.292	-1.002	-1.029	0.862	-1.233	0.333	1.242	0.755	-1.847	1.989	-1.332
0.904	-1.059	-1.806	-0.212	0.781	-0.209	-0.639	0.461	2.105	0.767	-1.436	-2.419	0.993	-0.618	-1.105	1.673	-1.982	-2.709	0.487	-0.852	-3.345	-0.182	-2.09	-2.361	1.805	0.055	-1.477	1.328	-1.187	-0.198	-0.296	0.188	-0.705	-0.057	1.312	0.368	0.05	0.807	1.823	-0.939	1.966	0.35	0.924	1.818	0.107	0.845	-0.007	1.747	-1.296	0.157
-0.929	2.332	0.279	-0.235	-0.216	0.159	1.106	-2.192	-0.327	-1.132	2.906	-0.099	-0.696	1.641	0.635	-0.269	3.258	-0.758	-1.457	3.709	0.612	-1.967	2.683	-0.776	-1.499	1.457	1.328	0.193	1.926	1.253	-0.206	0.458	-0.194	-0.251	-0.892	0.525	0.333	-2.083	-0.25	-1.344	-1.115	0.721	0.368	-0.772	1.457	-0.129	-3.043	0.134	1.821	-2.215
-0.111	-2.127	1.136	0.361	-0.008	-0.344	-0.14	2.123	-0.915	-0.455	-2.387	1.74	0.221	-1.766	0.49	-0.046	-3.445	1.827	-1.559	-2.325	1.576	-0.142	-1.855	2.634	-0.051	-2.219	-0.439	1.379	-1.987	0.585	0.04	-0.306	0.305	0.689	0.284	-0.992	0.577	1.771	-1.046	0.166	-0.247	-1.781	1.779	0.068	-0.976	1.24	2.251	-0.326	-0.817	2.373
-0.6	2.374	0.94	0.042	-0.004	0.025	0.573	-2.334	-0.919	-0.834	3.031	0.703	-0.335	1.622	1.125	-0.269	3.35	-0.124	-0.807	3.758	1.564	-1.943	2.924	0.425	-1.034	1.273	1.852	0.677	1.692	1.603	-0.342	0.696	-0.055	0.4	-0.688	0.13	0.239	-1.566	-1.044	0.127	-1.263	0.985	1.507	-0.489	0.126	-0.911	-1.619	-1.241	0.908	-3.003
-2.077	-0.222	-1.584	-0.03	0.044	-0.01	2.072	0.221	1.596	-2.327	-0.578	-2.192	-1.738	0.144	-0.937	-2.031	-0.149	-3.199	-3.392	-0.506	-2.098	-1.982	-1.618	-2.136	-2.122	-0.23	0.003	-1.917	1.291	-0.943	-0.23	-0.082	-0.732	0.177	0.196	0.716	1.695	0.072	0.921	-0.315	-0.535	1.299	-0.29	1.109	1.075	2.035	-0.943	0.597	2.333	0.359
-0.067	-2.355	-0.548	-0.204	-0.16	0.37	0.163	2.439	0.276	-0.068	-2.48	-1.266	-0.104	-2.16	0.226	-1.095	-2.705	-1.521	0.599	-3.316	-1.423	0.381	-1.683	-1.868	0.927	-2.117	0.58	-0.699	-2.786	0.824	-0.632	-0.745	0.613	0.217	0.431	0.11	-0.346	1.833	0.401	0.315	0.33	-0.969	1.236	0.326	0.603	-1.283	1.957	-0.157	0.666	2.935
-0.667	2.321	0.628	0.231	-0.163	0.317	0.56	-2.204	-0.854	-1.221	2.795	0.499	-0.082	1.741	0.723	-1.192	3.754	1.142	-2.156	2.298	0.767	-1.289	3.084	-0.58	0.051	1.538	1.853	0.885	2.177	0.364	-0.345	0.314	0.153	0.818	-0.641	0.471	0.601	-2.068	-0.05	0.882	-0.682	1.558	1.725	-0.169	0.173	1.437	-2.7	0.382	0.536	-2.247
1.013	1.239	-1.892	-0.297	0.126	-0.159	-0.844	-1.268	1.995	1.53	1.737	-1.826	0.421	0.712	-1.884	1.805	1.807	-2.858	2.356	1.373	-1.205	1.272	2.689	-1.403	0.836	-0.327	-2.15	-0.308	1.019	-2.709	-0.425	0.725	-0.651	-0.171	-0.453	0.337	-0.979	-0.569	1.592	0.981	-0.482	0.446	-0.258	-1.535	-0.213	-0.644	0.227	2.321	-0.689	-1.908
0.658	-1.768	1.096	0.134	-0.398	-0.858	-0.897	2.006	-0.341	1.289	-1.613	1.44	-0.016	-1.903	0.653	1.193	-1.9	2.504	1.523	-0.529	1.389	2.141	-2.18	1.101	-0.929	-1.536	1.211	-0.113	-2.939	0.456	0.031	-1.15	-0.746	0.158	0.361	-0.841	-1.036	1.22	-0.395	0.296	0.539	-1.916	1.092	0.744	-0.335	-1.826	1.038	-1.118	-0.716	2.698
1.151	0.701	-2.215	-0.254	0.162	-0.049	-1.013	-0.822	2.257	1.437	0.373	-2.803	0.799	0.986	-1.541	2.114	1.175	-3.238	0.682	0.095	-3.553	2.079	-0.495	-2.545	0.022	1.784	-1.764	1.651	1.452	-0.986	0.086	-0.048	-0.692	-0.585	0.368	0.608	-0.656	-0.903	1.513	-1.662	0.743	0.469	0.038	1.214	0.996	-1.087	-1.718	0.912	-1.365	-0.684
-1.553	1.221	-1.682	-0.001	0.007	-0.05	1.562	-1.19	1.748	-1.659	1.425	-2.378	-1.362	0.968	-0.939	-0.821	1.932	-2.801	-2.579	2.025	-2.501	-1.912	0.55	-2.991	-2.165	0.331	-0.419	-1.314	1.86	-0.254	-0.004	0.314	-0.78	0.006	-0.292	0.702	1.444	-0.517	1.249	-0.614	-1.153	0.635	-0.451	0.451	1.333	2.059	-0.68	0.357	1.595	-1.796
1.243	0.577	2.133	-0.107	0.354	-0.186	-1.184	-0.76	-1.967	1.561	0.18	2.691	0.852	0.954	1.499	2.155	-0.68	2.359	0.922	-0.287	3.398	2.273	0.93	2.979	1.59	1.46	0.929	0.128	1.69	1.891	0.001	0.054	0.511	-0.229	0.658	-0.874	-1.325	-0.02	-1.656	0.679	0.562	-1.458	-0.406	1.77	-0.79	-2.234	-0.242	-1.065	-0.98	-1.406
-0.867	1.267	-1.848	-0.315	-0.848	-0.261	1.135	-0.505	2.048	-1.397	1.657	-2.175	-0.335	0.785	-1.452	-2.286	1.906	-1.51	-1.823	0.933	-2.963	-0.954	2.601	-2.702	0.165	1.502	-0.805	0.551	0.475	-2.067	-0.782	-0.465	-0.738	0.209	-1.097	0.245	0.686	-0.179	1.436	1.106	-1.36	-0.355	-0.34	-2.023	0.683	1.27	0.673	1.058	1.525	-0.852
-0.265	1.022	-2.124	-0.771	0.167	0.308	0.945	-1.203	1.829	-0.593	1.213	-2.737	0.023	0.786	-1.412	0.137	1.84	-3.349	-1.495	1.852	-2.599	-0.82	0.231	-3.307	0.535	1.698	-0.949	0.792	0.039	-1.588	-0.969	0.228	-0.403	-0.454	0.065	0.952	0.549	-1.113	1.137	-1.249	-0.168	1.743	0.108	0.977	1.285	-0.042	-2.024	0.934	1.274	-1.229
-0.482	1.891	-0.514	0.774	-0.083	-0.523	-0.161	-1.777	0.913	-0.232	2.434	-0.123	-0.668	1.249	-0.955	-0.145	2.101	0.969	-1.11	3.124	-0.019	0.659	2.938	-0.487	-0.995	1.577	-2.014	-1.583	0.901	-0.442	0.377	0.19	-1.146	1.056	-0.318	0.161	0.155	-1.086	1.149	1.597	0.559	0.713	1.83	-1.047	-0.153	0.766	-1.29	2.084	-0.414	-2.379
0.184	1.964	-1.354	0.014	-0.365	-0.309	-0.131	-1.745	1.519	0.456	2.629	-1.222	-0.073	1.196	-1.427	0.02	3.183	-2.031	1.582	2.651	-1.365	0.037	3.058	-0.215	0.233	0.791	-2.443	-1.119	1.344	-1.407	0.342	0.302	-0.25	-0.29	-1.033	-0.372	0.145	-1.954	0.758	-0.041	-1.451	-1.387	-1.386	-1.004	-0.413	-0.214	-3.055	0.681	-0.404	-1.492
0.044	-1.795	1.5	-0.4	-0.305	-0.194	0.173	1.951	-1.379	0.681	-1.758	1.835	-0.64	-1.793	1.074	1.467	-2.305	1.356	0.502	-2.077	2.917	1.175	-0.835	1.795	-1.482	-1.36	1.587	-0.882	-2.869	0.934	-0.527	-1.039	-0.251	-0.264	0.421	-0.134	0.066	1.149	-1.434	0.582	0.675	0.517	-1.104	0.926	0.321	1.11	0.799	-1.68	0.238	2.656
-0.177	2.268	-0.64	0.141	0.075	0.905	0.075	-2.36	-0.118	-0.46	2.943	-0.664	0.112	1.509	-0.539	-0.537	3.238	-1.758	0.083	3.679	-0.089	-1.527	3.006	-0.334	1.234	1.631	-0.598	-0.207	0.799	-1.335	-0.16	0.771	0.803	0.433	-0.645	0.874	-0.103	-1.6	-0.207	0.32	-1.125	1.925	1.515	-0.451	0.827	-1.204	-1.403	-0.289	0.269	-3.03
0.036	-1.606	1.746	-0.156	-0.16	-0.124	0.046	1.737	-1.686	0.115	-1.37	2.408	-0.032	-1.807	0.992	0.904	-0.601	2.425	0.292	-2.192	3.105	-0.814	-0.825	2.731	-1.033	-2.221	0.826	0.685	-2.624	0.758	0.278	-0.781	-0.113	-0.606	0.476	-0.154	-0.632	1.415	-1.37	-0.38	0.91	0.84	-1.633	-0.049	0.039	-0.998	0.807	-2.202	0.696	2.002
-1.408	1.077	2.042	-0.026	-0.073	-0.015	1.364	-1.026	-1.967	-1.329	1.506	2.64	-1.427	0.617	1.369	-1.084	2.549	2.273	-0.525	1.078	3.325	-2.317	1.585	3.175	-2.193	1.032	0.634	-1.626	-0.477	1.681	-0.182	0.564	0.427	0.096	-0.7	-0.433	1.265	-0.484	-1.422	-0.813	-0.926	-1.082	0.451	-1.542	0.128	1.016	0.494	-1.977	1.395	-1.554
0.559	0.093	-2.401	-0.084	0.615	0.12	-0.421	-0.619	2.242	0.327	0.135	-3.105	0.747	0.065	-1.621	1.125	-0.117	-3.753	0.059	1.163	-3.335	-0.552	-0.533	-3.201	1.597	0.737	-1.267	1.089	-0.951	-1.355	-0.341	0.395	-0.568	0.238	0.734	0.787	0.209	-0.517	1.746	-0.389	1.52	1.296	1.267	1.188	0.73	0.324	-1.461	1.139	-1.029	-0.634
-0.732	2.265	0.508	-0.275	-0.189	0.183	0.84	-2.176	-0.625	-0.622	2.898	0.222	-0.831	1.532	0.764	0.318	2.948	-0.361	-0.414	3.609	1.055	-1.448	3.109	-0.466	-1.932	1.315	0.932	-0.302	1.527	1.747	-0.274	0.497	-0.188	-0.302	-0.894	0.544	0.1	-2.119	-0.356	-1.235	-1.079	1.042	0.481	-0.758	1.355	-0.045	-3.026	0.352	1.515	-2.16
-0.559	-2.121	1.104	0.374	0.053	0.035	0.27	2.121	-1.152	-0.976	-2.345	1.657	-0.124	-1.774	0.513	-0.762	-3.465	1.675	-2.061	-2.307	1.377	-0.775	-1.935	2.677	-0.3	-2.342	-0.456	0.906	-2.033	0.706	-0.24	-0.241	0.334	0.98	0.356	-0.279	0.833	1.826	-0.633	1.246	-0.29	-1.107	1.861	0.239	0.456	0.76	2.452	0.288	-0.281	2.311
0.083	2.635	-0.256	-0.056	-0.008	0.108	-0.043	-2.571	0.235	0.417	3.143	-0.674	-0.247	2.025	0.175	1.502	3.135	-0.501	0.127	4.107	-0.329	0.288	2.998	-1.751	-1.336	1.953	-0.123	-0.21	2.185	1.27	0.301	0.633	-0.189	-0.414	-0.635	0.418	0.368	-1.841	0.136	-1.352	-0.693	-0.116	-0.581	-0.575	1.458	0.669	-1.853	-0.831	-0.463	-3.178
-2.303	0.273	-1.161	0.025	-0.06	-0.079	2.282	-0.218	1.182	-2.772	0.02	-1.655	-1.736	0.489	-0.645	-2.327	0.085	-2.659	-3.639	0.657	-1.612	-3.072	-0.991	-1.376	-2.152	0.492	0.444	-1.491	1.57	-0.861	-0.351	-0.177	-0.743	0.413	0.067	0.577	1.871	-0.107	0.488	-0.121	-0.457	1.394	0.307	1.163	0.747	2.131	-1.016	-0.112	2.584	-0.299
-0.411	-2.267	-0.556	0.018	-0.232	0.387	0.453	2.39	0.301	-0.731	-2.276	-1.168	-0.068	-2.178	0.124	-1.809	-2.065	-1.113	-0.586	-3.307	-1.571	-0.405	-1.597	-1.889	1.036	-2.399	0.091	-0.565	-2.922	0.89	-0.265	-0.801	0.822	0.328	0.332	-0.043	0.402	1.656	0.695	-0.34	0.564	-0.849	1.239	-0.026	-0.521	-0.497	1.801	1.392	0.493	3.001
-1.076	1.189	1.867	0.229	0.221	-0.149	0.95	-1.318	-1.767	-1.192	1.066	2.584	-0.916	1.266	1.076	-2.111	1.514	2.874	-0.314	1.339	3.186	-1.403	-0.012	2.748	-0.314	2.195	0.92	-1.775	1.455	0.474	-0.106	0.061	0.504	0.561	0.381	-0.812	1.398	-0.677	-1.526	1.325	1.188	-0.546	-0.198	0.714	-1.557	1.719	-0.152	-2.459	0.504	-1.876
0.517	-1.149	-1.991	-0.183	0.256	-0.32	-0.453	0.999	2.182	1.056	-1.609	-1.839	-0.075	-0.605	-2.093	1.246	-2.21	-2.777	0.88	-2.285	-1.04	2.018	-1.103	-1.603	-1.063	-1.063	-2.01	0.145	-0.096	-3.129	-0.057	0.494	-1.019	-0.313	0.019	0.38	-0.195	1.16	1.421	0.446	-0.762	0.571	-1.297	-0.407	0.389	0.878	1.371	1.472	-0.712	0.797
-0.053	-1.683	1.643	0.242	-0.465	-0.703	-0.107	2.087	-1.016	-0.314	-2.342	1.958	0.223	-0.978	1.205	-1.323	-2.494	1.728	-0.161	-2.291	3.043	0.286	-3.219	1.703	1.254	-0.728	1.518	-0.486	-0.218	1.676	-0.024	-1.04	-0.275	0.48	0.175	-1.014	-0.259	1.47	-0.533	0.28	0.145	-2.083	1.568	0.301	-0.916	-1.389	1.318	-0.671	0.091	2.595
0.869	1.799	-1.684	-0.073	-0.054	-0.097	-0.841	-1.804	1.725	1.147	2.427	-1.633	0.537	1.092	-1.666	1.556	2.671	-2.618	1.964	2.534	-0.889	0.385	3.259	-1.355	1.326	0.392	-1.924	-0.239	1.074	-2.473	-0.059	0.699	-0.361	-0.085	-0.817	0.147	-0.62	-1.027	1.559	1.006	-1.139	0.104	-0.797	-1.438	-0.435	0.163	-0.657	2.303	-1.031	-2.527
-1.349	0.342	-2.239	0.063	0.006	-0.059	1.267	-0.374	2.326	-1.4	0.556	-2.943	-1.221	0.121	-1.456	-1.675	1.647	-2.972	-2.191	-0.045	-3.39	-0.385	0.481	-3.438	-1.354	-0.991	-1.41	-2.069	0.713	-0.92	0.125	0.32	-0.77	-0.014	-0.309	0.67	1.175	0.018	1.617	-0.023	-1.405	0.544	-0.886	0.13	1.116	2.199	0.093	0.998	1.28	-0.774
0.341	0.238	2.415	-0.291	0.198	-0.146	-0.238	-0.413	-2.342	0.722	-0.059	2.917	-0.061	0.527	1.795	1.81	0.003	2.693	0.514	-1.13	3.046	0.52	0.336	3.933	0.226	1.62	1.663	-1.108	0.47	2.149	0.201	-0.066	0.346	-0.806	0.441	-0.639	-0.949	-0.302	-1.954	-0.413	1.48	-1.006	-1.797	0.586	-0.136	-1.447	-1.297	-1.797	0.424	-0.498
-1.303	1.212	-1.425	-0.33	-0.869	-0.156	1.588	-0.496	1.516	-1.853	1.617	-1.375	-0.721	0.708	-1.423	-2.056	2.051	-0.373	-2.711	1.069	-1.702	-1.729	2.507	-2.06	0.179	1.3	-1.17	-0.59	0.32	-2.444	-0.933	-0.471	-0.474	0.323	-1.137	0.157	0.986	-0.172	1.101	1.148	-1.522	-0.596	0.005	-2.075	0.664	1.357	0.709	0.546	2.109	-0.868
0.571	0.13	-2.349	-0.433	0.615	0.086	-0.163	-0.713	2.266	0.412	0.117	-3.036	0.666	0.156	-1.558	1.377	0.043	-3.544	-0.038	1.081	-3.289	-0.256	-0.658	-3.443	1.573	0.899	-1.458	0.947	-0.854	-1.231	-0.53	0.485	-0.687	-0.242	0.64	0.837	-0.107	-0.723	1.469	-1.106	1.167	1.378	0.641	1.277	1.097	-0.778	-1.473	1.12	-0.228	-0.644
0.835	1.716	-0.434	0.677	-0.654	-0.316	-1.436	-1.12	0.692	1.242	2.07	0.021	0.399	1.267	-0.926	1.184	1.603	1.011	1.05	3.128	0.05	2.395	2.078	-0.315	0.524	1.574	-1.953	-0.626	1.339	-0.534	0.667	-0.24	-0.973	0.594	-0.971	0.384	-0.791	-0.767	1.043	1.353	-0.56	1.048	0.8	-2.036	0.273	-0.683	-1.135	2.12	-1.972	-1.452
1.296	1.504	-1.381	-0.104	-0.46	-0.33	-1.19	-1.237	1.601	1.675	2.085	-1.173	0.86	0.84	-1.524	1.568	2.948	-1.993	2.771	1.774	-1.075	1.29	2.668	-0.373	1.503	0.061	-2.015	0.037	1.068	-2.231	0.258	0.195	-0.28	-0.435	-1.115	-0.393	-0.818	-1.681	1.06	0.016	-1.847	-1.022	-1.51	-1.019	-0.827	-1.476	-2.488	0.848	-1.522	-0.791
1.269	-1.899	0.59	-0.078	-0.27	-0.3	-1.27	2.065	-0.385	1.916	-1.764	0.848	0.549	-1.975	0.274	2.797	-1.642	0.149	2.128	-2.639	1.49	1.908	-0.789	1.379	-0.279	-2.255	1.07	0.663	-2.868	-0.426	0.1	-0.919	-0.653	-0.278	0.376	0.055	-1.013	1.38	-0.776	0.633	0.84	0.549	-0.917	-0.019	0.865	-0.306	1.678	-1.624	-1.475	2.652
-0.766	2.171	-0.586	0.175	0.093	0.819	0.594	-2.303	-0.154	-1.008	2.877	-0.464	-0.501	1.381	-0.645	-1.193	3.342	-1.446	-0.133	3.452	-0.032	-1.873	2.951	0.16	0.432	1.366	-1.272	-1.326	0.747	-1.078	-0.285	0.697	0.745	0.59	-0.56	0.768	0.097	-1.662	-0.148	0.651	-0.868	1.746	1.589	-0.228	0.433	-0.898	-1.907	0.341	1.101	-2.844
-0.254	-1.166	1.969	-0.483	0.077	0.011	0.505	1.13	-1.961	0.376	-1.131	2.359	-0.923	-1.169	1.473	1.224	-1.545	1.769	0.314	-1.78	3.298	0.536	-0.112	2.692	-1.674	-0.542	1.918	-1.194	-2.236	1.448	-0.661	-0.687	0.01	-0.333	0.841	0.021	0.001	1.502	-1.427	0.613	0.891	0.606	-1.062	1.497	0.432	-0.982	1.5	-2.074	0.973	0.744
-2.003	1.218	0.94	0.122	0.085	0.142	1.986	-1.233	-1.022	-2.531	1.655	0.713	-1.341	0.763	1.129	-2.995	1.358	-0.279	-2.346	2.73	0.63	-3.361	1.542	1.392	-1.847	-0.282	1.228	-1.066	0.945	2.177	-0.352	0.688	0.038	0.581	-0.518	0.252	1.528	-0.571	-0.998	0.03	-1.465	0.259	1.167	-0.357	1.187	0.812	-0.614	-1.841	2.381	-1.839
0.446	-0.514	-2.008	0.568	-0.612	0.672	-0.993	0.902	1.527	0.767	-0.269	-2.615	0.143	-0.767	-1.283	0.352	-0.642	-3.601	1.883	-0.372	-2.593	0.611	0.826	-2.705	0.088	-1.946	-1.331	-0.93	-0.354	-1.202	0.841	-0.404	-0.035	0.179	-0.811	1.324	-1.065	0.096	1.675	0.941	-0.613	2.109	-0.16	-1.813	1.438	-1.973	-0.146	1.018	-0.863	1.621
0.359	2.338	0.416	-0.014	-0.164	0.34	-0.377	-2.205	-0.629	0.165	2.99	0.112	0.528	1.597	0.691	0.135	2.839	-0.973	0.961	3.688	0.488	-0.838	3.301	0.499	0.225	1.52	1.741	1.604	1.401	0.669	-0.178	0.5	-0.002	0.147	-0.825	0.689	-0.56	-1.968	0.111	-0.174	-0.691	1.766	1.272	-0.949	0.538	-0.311	-2.819	0.797	-0.187	-2.362
-0.834	-2.017	1.084	0.393	-0.114	-0.077	0.587	2.11	-1.013	-1.32	-2.196	1.543	-0.3	-1.738	0.595	-1.637	-3.251	1.405	-2.242	-1.596	1.368	-1.03	-2.019	2.575	-0.503	-2.129	-0.396	0.65	-2.265	0.834	0.007	-0.27	0.585	0.779	0.05	-0.736	1.152	1.568	-0.894	0.167	-0.221	-1.647	1.659	-0.614	-0.817	1.918	1.902	-0.248	0.03	2.544
-1.866	1.752	0.584	-0.015	-0.006	-0.04	1.809	-1.797	-0.558	-2.052	2.199	1.161	-1.616	1.239	-0.014	-2.282	1.56	2.018	-2.925	2.704	0.834	-1.195	2.903	1.439	-1.328	1.852	-0.866	-2.35	0.522	-0.245	-0.279	0.512	0.474	0.242	-0.551	-0.547	1.217	-1.602	-0.051	0.747	-0.006	-1.414	-0.636	-1.029	-1.014	1.853	-1.133	0.831	2.299	-1.932
-2.316	1.242	0.012	-0.028	-0.02	0.048	2.317	-1.229	-0.018	-2.75	1.699	-0.366	-1.783	0.75	0.367	-2.514	2.752	-0.26	-3.82	1.464	0	-2.734	1.521	-1.408	-2.159	-0.259	0.584	-1.537	1.153	1.421	-0.461	0.524	-0.365	0.403	-0.557	0.471	1.794	-0.67	-0.228	-0.061	-1.524	0.466	0.589	-0.124	1.438	1.607	-0.769	-1.37	2.728	-1.761
-0.28	-2.034	-1.088	-0.476	-0.163	0.306	0.598	2.177	0.832	0.194	-2.02	-1.631	-0.795	-1.974	-0.48	-0.01	-1.278	-2.495	0.108	-3.057	-2.09	1.211	-1.823	-1.203	-0.433	-2.562	0.452	-1.795	-2.313	-0.885	-1.099	-0.559	0.031	0.156	0.254	0.543	0.054	1.773	0.402	1.088	-0.164	-0.005	0.317	-0.045	1.598	0.121	2.034	-0.718	1.114	2.488
-0.963	0.661	2.156	0.198	-0.229	0.096	0.884	-0.486	-2.219	-1.534	1.078	2.37	-0.333	0.243	1.845	-1.675	0.811	3.443	-2.482	0.836	1.831	-1.412	2.147	2.14	-0.592	-0.855	2.101	0.652	0.388	2.422	-0.226	0.338	0.354	0.624	-0.79	-0.173	0.635	-1.016	-1.703	0.287	-1.728	0.292	1.68	-0.777	0.198	1.081	-1.996	-2.018	1.129	0.024
-0.359	0.855	-2.149	-0.449	-0.22	-0.163	0.627	-0.786	2.195	0.091	1.414	-2.206	-0.857	0.234	-2.021	0.218	1.722	-3.193	1.11	1.146	-1.798	-0.31	2.238	-1.656	-0.463	-0.681	-2.517	-1.776	0.598	-2.441	-1.123	-0.068	-0.555	0.229	-0.417	0.213	0.037	-0.995	1.616	0.671	0.646	0.373	0.928	-1.027	-0.411	-0.895	-0.714	2.072	1.187	-0.546
-0.428	-2.204	0.814	-0.218	-0.118	-0.92	0.584	2.293	-0.019	-0.814	-2.817	0.982	-0.057	-1.519	0.563	-1.9	-2.735	0.646	-0.856	-2.891	2.117	-0.31	-3.692	0.532	0.989	-1.787	0.333	0.109	-0.776	1.441	-0.573	-0.752	-0.634	0.172	0.533	-1.064	0.273	1.568	0.121	-0.376	0.917	-1.961	1.198	0.357	-1.465	-0.681	1.88	0.672	0.854	2.92
1.213	1.975	-1.256	0.013	-0.075	-0.013	-1.205	-2.012	1.269	1.22	2.38	-1.852	1.125	1.477	-0.621	2.15	3.014	-1.663	0.401	3.122	-2.005	1.377	1.718	-2.715	1.064	2.246	0.224	2.026	0.883	-0.588	-0.061	0.452	-0.568	0.102	-0.633	0.543	-1.004	-1.698	0.519	0.004	0.052	1.431	1.115	-1.11	0.544	-1.89	-1.068	0.182	-1.328	-2.268
-0.071	-0.643	-2.54	0.054	-0.075	0.027	0.018	0.704	2.511	-0.368	-0.432	-3.158	0.21	-0.827	-1.805	-1.452	-0.634	-3.335	0.188	-0.966	-3.944	-0.146	0.646	-3.416	1.307	-0.726	-1.762	-0.053	-1.868	-1.631	-0.327	-0.015	-0.636	0.433	-0.127	0.684	-0.365	0.568	1.805	1.493	0.121	0.56	0.525	-1.133	1.162	-0.67	1.511	1.381	0.416	0.801
-0.515	0.789	2.268	-0.215	-0.509	0.002	0.58	-0.474	-2.314	-0.183	1.312	2.664	-0.826	0.196	1.76	-0.08	2.286	2.118	0.819	1.114	3.031	-0.913	1.634	3.449	-1.865	0.445	1.676	-0.776	-0.702	2.386	0.019	0.004	0.519	-0.464	-1.012	-0.524	0.437	-1.108	-1.758	-1.474	-0.732	-0.92	-0.489	-1.998	-0.004	1.479	-1.346	-1.273	0.641	0.142
-1.659	1.501	-1.358	0.02	-0.117	-0.073	1.655	-1.378	1.444	-1.714	2.135	-1.741	-1.521	0.805	-0.927	-0.778	2.324	-2.317	-1.819	3.057	-1.081	-2.519	2.096	-2.471	-2.053	-0.015	-1.524	-2.132	0.797	0.011	-0.111	0.46	-0.567	0.146	-0.67	0.445	1.409	-0.64	1.239	-0.003	-1.616	-0.11	-0.757	-0.588	1.096	2.164	-0.123	0.575	1.83	-2.06
-0.267	0.043	-2.38	-0.783	0.149	0.203	0.955	-0.136	2.154	-0.582	-0.099	-3.025	0.017	0.182	-1.64	-0.039	0.425	-3.776	-1.638	0.279	-3.125	-0.552	-1.194	-3.188	0.372	1.231	-1.513	0.883	-0.499	-1.425	-0.947	-0.109	-0.552	-0.499	0.391	0.915	0.721	-0.364	1.428	-1.259	0.074	1.653	-0.246	1.557	0.952	0.482	-1.477	1.493	1.109	0.131
0.284	1.487	-1.181	0.918	-0.439	0.183	-1.098	-1.132	1.08	0.541	2.132	-1.074	0.049	0.735	-1.251	0.99	2.357	-0.07	-0.214	2.864	-1.382	1.423	2.258	-1.694	-0.029	0.61	-2.379	-1	0.623	-0.837	0.889	-0.357	-0.578	0.81	-0.469	0.952	-0.654	-0.599	1.424	1.249	0.497	1.332	1.494	-1.299	1.296	-0.599	-0.757	2.521	-1.444	-1.623
1.984	1.153	-0.974	-0.062	-0.166	-0.161	-1.937	-1.076	1.075	2.498	1.617	-0.793	1.378	0.64	-1.107	3.119	1.814	-1.638	3.184	1.281	0.049	2.01	2.546	-0.304	1.775	-0.275	-1.476	0.934	0.996	-2.075	0.392	0.409	0.082	-0.521	-0.751	-0.388	-1.332	-1.49	0.664	0.144	-1.484	-0.854	-1.117	-0.429	-1.255	-1.851	-2.344	0.199	-2.447	-0.645
1.698	-1.42	-0.595	-0.026	0.05	-0.522	-1.705	1.409	0.912	2.041	-1.608	0.034	1.278	-1.154	-1.246	2.416	-0.728	0.512	2.848	-2.246	-0.269	1.488	-2.217	0.698	0.689	-1.988	-1.648	1.978	-0.849	-2.003	0.369	0.046	-1.154	-0.437	0.052	0.104	-1.356	1.278	0.18	0.312	0.126	0.948	-0.979	-0.923	0.175	-0.74	2.148	-0.135	-1.977	1.485
-0.456	2.21	-0.584	-0.035	0.018	0.98	0.512	-2.226	-0.279	-0.636	2.911	-0.566	-0.269	1.412	-0.539	-0.722	3.402	-1.518	-0.059	3.618	0.072	-1.597	2.993	-0.104	0.819	1.366	-0.815	-0.807	0.828	-1.318	-0.39	0.711	0.86	0.33	-0.673	0.945	0.186	-1.522	-0.317	-0.085	-1.206	1.85	1.437	-0.433	1.187	-0.959	-1.65	-0.461	0.838	-2.832
-2.039	-0.906	0.36	-0.179	0.345	-0.058	2.096	0.772	-0.313	-1.969	-1.506	0.758	-2.057	-0.224	-0.086	-1.387	-2.352	0.239	-2.959	-1.936	1.096	-1.29	-1.347	1.603	-2.57	0.632	0.427	-2.617	-0.502	-0.997	-0.639	0.142	-0.641	0.265	0.561	0.517	1.588	1.3	0.1	0.612	-0.287	1.169	-0.23	1.28	1.18	1.308	2.099	-0.555	2.504	0.255
-1.374	1.764	1.169	0.025	0.038	0.002	1.381	-1.764	-1.179	-1.427	2.073	1.819	-1.256	1.386	0.484	-0.488	2.655	2.016	-1.682	1.287	2.572	-2.337	2.768	1.825	-0.945	2.031	-0.321	-2.195	0.912	0.165	-0.064	0.472	0.636	0.128	-0.384	-0.645	1.257	-1.348	-0.476	0.314	0.268	-1.522	-0.878	-0.872	-0.786	2.166	-0.801	-0.203	1.445	-2.102
1.349	-0.317	-1.751	0.429	-0.343	0.767	-1.729	0.509	1.118	1.787	0.074	-2.194	0.885	-0.691	-1.198	2.005	-0.626	-3.02	2.767	0.206	-1.67	1.298	1.069	-2.51	1.104	-1.762	-1.26	-0.118	-0.682	-1.604	0.886	-0.031	0.245	-0.116	-0.657	1.205	-1.561	-0.277	0.957	0.106	-0.502	2.28	-0.039	-1.779	1.073	-1.845	-0.442	-0.12	-1.79	1.215
-1.066	1.505	1.47	0.062	-0.567	0.354	1.004	-1.118	-1.7	-1.413	2.148	1.307	-0.697	0.791	1.574	-0.746	2.766	0.688	-1.565	2.598	2.289	-2.355	1.747	0.875	-1.266	0.26	2.324	0.331	0.991	1.886	-0.588	-0.146	0.371	0.725	-0.987	0.33	0.905	-1.577	-1.043	0.734	-1.802	1.061	1.493	-0.287	0.633	1.885	-2.139	-0.809	1.061	-0.653
-1.116	-1.972	1.101	0.46	-0.069	0.003	0.851	1.98	-1.113	-1.666	-2.089	1.548	-0.499	-1.766	0.608	-2.03	-3.125	1.458	-2.568	-1.427	1.276	-1.427	-1.985	2.677	-0.743	-2.12	-0.408	0.394	-2.256	1.055	-0.153	-0.251	0.419	1.075	0.112	-0.425	1.451	1.508	-0.863	0.937	-0.507	-1.274	1.954	-0.364	0.063	1.943	2.098	-0.029	0.266	2.33
-1.598	2.063	-0.292	0.065	0.045	0.019	1.559	-2.088	0.222	-2.184	2.422	0.001	-0.948	1.615	-0.569	-2.897	1.657	0.278	-2.495	3.225	-0.672	-1.983	2.831	0.976	-0.083	2.368	-0.639	-1.293	1.303	-1.588	-0.583	0.397	0.257	0.712	-0.299	-0.228	0.874	-1.681	0.385	1.562	0.427	-0.02	0.62	-0.549	-1.352	0.932	-1.588	1.466	2.191	-2.408
-2.167	0.187	-1.492	-0.035	0.045	-0.014	2.174	-0.214	1.525	-2.525	0.595	-1.97	-1.703	-0.217	-0.957	-2.996	1.504	-1.555	-3.363	-0.052	-2.493	-1.787	0.95	-2.762	-1.609	-1.259	-1.306	-2.342	-0.273	-0.025	-0.377	0.384	-0.611	0.3	-0.283	0.594	1.612	0.281	1.119	0.529	-1.286	0.29	-0.339	-0.444	1.449	2.143	0.739	0.233	2.622	-0.719
-0.289	-2.242	-0.575	-0.31	-0.092	0.153	0.482	2.294	0.49	0.035	-2.396	-1.195	-0.647	-1.992	0.108	-0.678	-2.185	-2.072	0.153	-3.487	-1.134	1.056	-1.85	-1.359	0.042	-2.286	0.933	-1.621	-2.547	0.008	-0.918	-0.559	0.229	0.298	0.369	0.076	-0.096	1.735	0.542	0.677	0.454	-0.948	1.062	-0.062	0.776	-0.974	2.096	0.03	1.046	2.744
-1.502	1.098	1.514	0.119	-0.265	0.217	1.445	-0.987	-1.629	-2.188	1.375	1.489	-0.742	0.739	1.473	-2.333	1.916	2.479	-3.019	0.73	1.355	-2.267	2.135	0.709	-0.722	0.065	2.314	-0.034	1.637	1.515	-0.571	0.046	0.127	0.814	-0.584	0.306	1.349	-1.356	-0.916	0.892	-1.243	1.168	1.537	0.27	0.47	2.315	-1.628	-0.649	1.492	-0.601
0.089	1.387	-1.997	-0.014	-0.237	-0.275	-0.032	-1.228	2.105	0.026	2.077	-1.857	0.129	0.604	-2.085	0.337	2.717	-2.722	0.688	2.367	-0.952	-1.012	2.452	-1.53	1.147	0.228	-2.378	-0.451	0.277	-3.008	-0.404	-0.301	-0.954	0.384	-0.182	0.369	-0.322	-1.129	1.372	0.178	0.739	0.894	1.489	-0.274	0.323	-1.377	-0.729	1.606	0.302	-1.253
0.096	-2.359	-0.355	0.363	0.272	-0.773	-0.36	2.103	1.049	0.078	-3.004	-0.73	0.132	-1.61	-0.009	-0.637	-2.978	-1.645	-0.329	-3.807	0.006	1.077	-3.269	-0.98	1.033	-1.541	0.696	-0.871	-1.451	0.495	0.186	-0.426	-1.006	0.504	0.925	-0.41	-0.334	1.345	0.82	0.468	1.694	-1.225	1.567	1.014	-0.108	-1.382	1.118	0.598	-0.335	2.784
1.607	1.61	1.268	0.007	-0.034	-0.001	-1.647	-1.57	-1.254	2.167	1.649	1.732	0.946	1.5	0.77	2.861	2.427	1.466	2.806	0.721	1.664	1.884	1.757	2.794	1.41	1.671	-0.271	0.277	2.321	1.076	0.272	0.145	0.705	-0.27	-0.206	-0.699	-1.215	-1.429	-0.585	0.452	-0.445	-1.564	-0.646	0.772	-1.047	-0.588	-2.3	-0.214	-1.987	-1.64
-0.854	0.553	-2.335	-0.166	-0.403	0.075	0.985	-0.246	2.326	-1.284	1.059	-2.699	-0.413	0.02	-1.86	-2.302	0.599	-2.883	-0.701	1.261	-3.647	-1.367	2.024	-2.13	0.652	0.173	-2.033	-0.68	-0.971	-2.292	-0.65	0.01	-0.378	0.332	-0.784	0.541	0.287	-0.354	1.94	1.431	-0.691	0.146	0.131	-1.852	0.349	-0.249	0.596	1.95	1.648	-0.167
0.284	-0.073	2.378	-0.455	-0.031	-0.062	-0.062	0.065	-2.299	0.903	-0.105	2.815	-0.364	-0.033	1.852	1.586	0.672	2.392	1.349	-1.139	2.676	0.654	-0.091	3.887	-0.801	0.944	1.864	-1.026	-0.842	2.135	0.057	-0.298	0.421	-0.981	0.211	-0.537	-0.786	-0.172	-1.987	-0.972	1.325	-0.545	-1.914	-0.132	-0.147	-0.72	-1.279	-2.04	0.597	0.298
0.369	2.426	-0.945	-0.113	-0.057	-0.178	-0.283	-2.379	1.083	0.363	3.103	-0.681	0.344	1.647	-1.162	1.142	3.21	0.129	-0.671	3.479	-0.396	0.709	3.762	-1.494	1.403	1.347	-1.494	-0.373	1.566	-2.033	-0.218	0.691	-0.084	0.006	-0.789	-0.262	-0.613	-1.662	0.962	1.079	-1.09	-0.459	-0.443	-1.168	-1.187	-0.553	-1.052	1.862	0.057	-3.009
-0.279	0.188	-2.338	-0.858	-0.121	0.222	0.995	-0.075	2.125	-0.455	-0.038	-3.009	-0.142	0.404	-1.565	0.015	0.565	-3.794	-1.515	-0.091	-3.218	-0.092	-1.061	-3.152	-0.303	1.477	-1.336	0.981	0.171	-1.392	-0.956	-0.356	-0.52	-0.646	0.135	0.933	0.794	-0.313	1.358	-1.349	-0.338	1.629	-0.796	1.193	0.974	0.852	-1.399	1.271	1.111	0.158
-0.148	-0.155	-1.883	0.957	0.391	0.121	-0.685	-0.194	1.826	-0.432	0.379	-2.277	0.215	-0.7	-1.406	-1.367	0.908	-1.825	-0.813	0.089	-3.244	0.278	1.151	-2.546	0.773	-1.477	-1.939	-0.565	-1.32	-0.863	1.205	-0.171	-0.381	0.56	0.894	0.614	-0.683	0.528	1.407	0.465	1.831	0.01	1.479	1.18	1.239	-0.987	1.365	2.027	-0.624	-0.854
0.615	0.466	-2.291	-0.324	-0.129	0.021	-0.399	-0.411	2.356	1.215	0.47	-2.701	-0.003	0.436	-1.768	0.928	0.535	-3.732	1.797	-0.452	-2.657	1.805	1.395	-2.481	-0.768	-0.29	-2.061	-0.464	1.446	-1.865	0.314	0.056	-0.301	-0.959	-0.315	0.377	-0.705	-0.902	1.807	-1.404	-1.174	-0.295	-1.732	0.45	0.272	-1.757	-1.179	2.224	-0.117	0.072
1.181	-1.963	-0.671	0.335	0.172	-0.262	-1.416	1.859	0.823	0.935	-2.498	-0.287	1.41	-1.314	-1.063	1.276	-2.338	0.735	1.277	-3.476	-0.6	-0.133	-2.548	-0.287	1.087	-1.446	-2.081	2.609	-1.36	-1.017	1.038	0.029	-0.522	-0.376	0.297	0	-0.695	1.761	0.432	-0.56	-0.352	0.848	-1.021	0.087	-0.895	0.144	2.068	1.067	-2.079	1.888
-2.101	0.945	-0.831	0.408	0.699	0.252	1.749	-1.518	0.58	-2.785	1.235	-0.754	-1.322	0.671	-0.845	-3.223	1.272	-1.814	-2.698	2.226	-0.326	-3.366	0.605	-0.05	-0.92	0.89	-1.873	-1.439	-0.447	-0.859	-0.318	0.949	0.285	1.078	0.353	0.159	1.083	-1.181	0.26	1.74	0.679	0.959	1.533	0.642	-0.764	0.261	-1.431	1.014	2.375	-1.756
-2.168	-0.816	-0.307	-0.066	0.357	-0.082	2.21	0.647	0.346	-2.359	-1.353	0.104	-1.872	-0.221	-0.76	-2.28	-2.309	-0.319	-3.386	-1.26	0.459	-1.812	-1.385	1.099	-2.409	0.733	-0.504	-2.203	-0.539	-1.767	-0.312	-0.01	-0.715	0.17	0.724	0.553	1.651	1.242	0.484	0.095	0.179	1.491	-0.504	1.647	0.512	1.696	1.88	-0.403	2.664	0.085
0.948	2.093	1.11	-0.033	-0.014	0.049	-0.934	-2.087	-1.13	1.582	2.405	1.094	0.265	1.701	1.084	1.703	2.857	0.132	2.421	1.737	1.114	1.755	3.149	1.93	-0.501	2.407	0.799	-0.042	1.285	2.078	0.251	0.669	-0.088	-0.315	-0.697	0.182	-0.305	-1.603	-1.061	-1.393	-0.525	0.459	0.157	-1.181	1.098	-0.202	-0.988	-2.001	-1.526	-2.495
1.469	-0.424	-1.617	-0.765	-0.52	-0.203	-0.863	0.956	1.718	2.041	-0.798	-1.714	0.811	-0.055	-1.458	2.854	-0.167	-2.118	1.793	-1.564	-2.478	2.401	-1.356	-0.76	0.281	0.04	-2.388	1.038	0.981	-1.087	-0.065	-0.814	-0.48	-1.388	-0.114	0.062	-1.074	1.09	0.928	-1.876	-0.824	0.672	-2.05	0.197	-0.778	-0.288	1.683	0.491	-0.673	0.771
0.924	0.413	2.135	-0.065	-0.353	-0.041	-0.91	-0.213	-2.094	0.781	0.936	2.594	1.036	-0.145	1.574	1.021	1.952	2.18	1.292	0.817	3.546	-0.282	0.971	2.922	0.783	-1.162	1.883	2.152	-0.094	1.36	0.275	0.259	0.269	-0.421	-0.966	-0.354	-1.321	-0.549	-1.483	-0.883	-1.647	0.447	0.354	-1.619	-0.751	-1.753	-1.561	-1.918	-0.484	0.093
-1.526	-1.525	1.092	0.07	-0.157	-0.445	1.481	1.613	-0.816	-1.823	-1.596	1.782	-1.165	-1.392	0.341	-2.726	-2.213	1.709	-2.083	-0.592	2.214	-1.09	-1.993	2.504	-1.924	-1.232	-0.336	-0.563	-2.321	0.112	-0.173	-0.303	0.267	0.303	-0.012	-1.149	1.509	0.945	-1.229	-0.5	0.222	-1.825	0.735	-0.964	-1.488	2.426	0.404	-0.961	1.409	2.19
-0.956	2.051	-1.219	-0.159	-0.077	-0.12	1.002	-1.987	1.346	-1.156	2.287	-1.852	-0.747	1.715	-0.544	-0.286	2.194	-2.542	-1.548	3.362	-1.8	-1.938	1.7	-2.283	-1.406	2.092	0.226	0.288	2.111	-0.202	-0.746	0.148	-0.555	0.398	-0.295	0.345	0.377	-1.774	0.879	0.668	0.289	1.236	1.31	-0.214	-0.264	-0.533	-1.931	1.499	1.589	-2.106
-2.312	0.763	-0.921	-0.045	0.039	0.017	2.333	-0.798	0.91	-2.598	1.267	-1.351	-1.92	0.245	-0.475	-2.522	2.289	-0.895	-3.651	1.013	-1.206	-2.234	1.263	-2.406	-2.089	-0.77	-0.847	-2.314	0.204	0.543	-0.416	0.591	-0.379	0.333	-0.516	0.428	1.826	-0.264	0.572	0.131	-1.529	-0.051	-0.121	-0.497	1.464	2.247	-0.113	-0.496	2.717	-1.315
-0.301	-2.314	-0.488	-0.313	-0.149	0.333	0.512	2.424	0.296	-0.101	-2.435	-1.182	-0.523	-2.107	0.266	-0.789	-1.936	-1.938	-0.125	-3.512	-1.328	0.889	-1.964	-1.355	0.236	-2.468	0.986	-1.464	-2.721	0.471	-0.874	-0.659	0.51	0.242	0.353	0.172	0.01	1.862	0.584	0.34	0.386	-0.935	1.25	0.026	0.558	-1.052	2.01	0.405	1.004	2.897
0.43	0.947	2.095	-0.637	-0.073	-0.039	0.083	-0.934	-2.148	0.664	1.594	2.38	0.165	0.284	1.677	0.7	1.394	3.414	-0.022	2.446	2.304	1.76	1.773	2.233	-0.707	-0.078	2.362	0.778	-0.606	1.757	-0.259	0.547	0.215	-0.96	-0.722	-0.323	-0.65	-1.005	-1.805	-2.034	-0.672	-0.176	-0.723	-1.561	0.413	-1.01	-2.009	-1.938	0.772	-0.852
0.925	1.636	-1.583	-0.056	-0.274	-0.374	-0.858	-1.514	1.766	0.867	2.358	-1.408	0.914	0.799	-1.753	1.74	3.005	-1.574	0.644	2.402	-0.336	0.118	2.944	-1.801	1.921	0.499	-1.394	1.022	0.715	-2.858	-0.125	-0.206	-1.155	0.031	-0.357	0.41	-0.768	-1.509	0.948	-0.364	0.609	0.902	1.191	-0.492	0.583	-1.82	-1.427	0.686	-0.885	-1.461
0.841	-2.148	0.244	-0.057	0.01	-0.88	-0.843	2.139	0.541	1.041	-2.829	0.021	0.593	-1.384	0.405	0.297	-3.302	-0.652	1.041	-3.38	0.946	2.106	-2.899	-0.437	1.362	-0.728	0.836	-0.042	-1.439	1.271	-0.002	-0.761	-0.84	-0.125	0.782	-0.758	-0.871	1.337	0.423	-0.609	1.109	-1.707	0.852	1.121	-0.876	-1.89	1.059	0.365	-0.789	2.855
2.152	1.268	0.735	-0.01	-0.068	0.07	-2.146	-1.223	-0.782	2.382	1.938	1.037	1.832	0.558	0.415	3.475	1.984	1.184	1.91	1.959	2.051	1.979	2.734	0.409	2.396	-0.288	0.935	2.065	0.415	-0.696	0.291	0.503	0.469	-0.314	-0.641	-0.341	-1.856	-0.584	-0.405	0.098	-1.532	0.152	0.051	-0.545	-1.35	-2.294	-0.407	0.574	-2.346	-1.828
-0.09	0.008	-2.449	0.032	-0.377	0.1	0.119	0.233	2.376	-0.422	0.44	-2.94	0.253	-0.407	-1.841	-1.497	0.28	-2.877	-0.133	0.081	-4.002	-0.159	1.493	-2.787	1.368	-0.564	-1.976	-0.157	-1.443	-2.001	-0.202	0.082	-0.464	0.278	-0.832	0.655	-0.16	-0.48	2.086	1.35	-0.888	0.682	-0.149	-1.843	0.434	-1.268	-0.285	1.998	0.411	0.874
0.505	0.501	2.362	-0.426	0.09	-0.058	-0.228	-0.57	-2.306	1.043	0.329	2.826	-0.063	0.638	1.814	2.022	0.536	2.37	1.071	-0.767	3.012	0.937	1.019	3.731	-0.088	1.716	1.423	-1.066	0.419	2.259	0.045	-0.158	0.49	-0.888	0.338	-0.607	-0.898	-0.544	-1.843	-0.811	1.404	-0.993	-1.877	0.286	-0.11	-1.045	-1.561	-1.522	0.405	-0.554
0.237	2.524	-0.75	0.056	0.054	0.095	-0.285	-2.539	0.684	-0.181	3.135	-0.88	0.624	1.808	-0.584	-0.639	3.445	0.045	-0.957	3.098	-1.624	0.472	3.926	-1.239	1.499	2.022	0.079	1.188	1.397	-1.445	-0.247	0.762	0.123	0.36	-0.649	0.067	-0.586	-1.775	0.594	1.328	-0.748	0.652	0.592	-0.865	-1.015	-1.101	-1.455	1.52	0.045	-3.182
0.205	-0.191	-2.33	0.291	0.826	0.084	-0.497	-0.484	2.26	-0.16	-0.231	-2.969	0.553	-0.077	-1.607	0.543	-0.908	-3.586	-0.292	0.734	-3.459	-1.175	-0.69	-2.797	1.669	0.049	-1.707	0.495	-1.028	-1.109	0.11	0.989	-0.642	0.426	0.566	0.797	-0.686	-0.208	1.533	0.742	1.512	1.429	1.33	-0.114	0.795	-1.486	0.516	1.623	-0.271	-0.716
0.094	0.117	-1.971	0.745	0.522	0.292	-0.758	-0.604	1.736	-0.319	0.616	-2.31	0.573	-0.382	-1.522	-1.082	1.128	-1.72	-0.914	-0.03	-3.081	0.352	1.426	-2.841	1.4	-0.723	-2.24	-0.061	-1.237	-1.291	1.163	0.144	-0.238	0.211	0.81	0.78	-0.979	-0.006	1.288	-0.196	1.773	0.344	0.893	1.166	1.573	-1.637	0.686	1.898	-0.501	-1.139
0.97	0.405	-2.283	-0.451	-0.319	-0.062	-0.668	-0.175	2.338	1.631	0.672	-2.533	0.279	0.117	-1.913	1.521	0.892	-3.67	2.241	-0.257	-2.437	2.081	1.51	-2.002	-0.088	-0.688	-2.605	-0.533	0.823	-2.129	0.23	-0.317	-0.441	-1.134	-0.305	0.301	-0.991	-0.75	1.809	-1.737	-1.15	-0.113	-1.58	0.661	0.183	-2.049	-0.946	2.2	-0.367	0.378
0.805	-1.508	-1.529	0.059	0.249	-0.441	-0.832	1.382	1.786	1.079	-2.016	-1.077	0.507	-0.896	-1.963	1.857	-1.699	-0.401	1.525	-2.704	-1.742	0.294	-2.498	-0.583	-0.49	-1.297	-2.299	1.132	-0.589	-2.843	0.281	0.376	-1.18	-0.157	0.126	0.282	-0.593	1.46	1.019	0.649	-0.268	0.875	-0.965	-0.605	0.315	0.352	2.129	0.931	-1.038	1.254
-1.084	1.993	0.346	0.001	-0.077	-0.851	1.068	-1.96	0.385	-1.169	2.7	0.282	-0.949	1.201	0.358	-2.096	3.081	0.852	-1.372	3.005	-0.729	-0.238	3.248	0.623	-1.897	0.619	0.246	-0.415	1.041	1.352	-0.043	0.669	-0.797	0.04	-0.824	-0.783	0.783	-1.216	0.423	0.494	-1.117	-1.728	-1.02	-1.216	-0.668	1.594	-0.525	0.74	1.298	-2.638
-1.584	-1.436	0.745	-0.287	0.223	-0.212	1.756	1.312	-0.639	-1.468	-1.594	1.435	-1.636	-1.232	-0.031	-0.959	-0.848	2.133	-0.918	-2.591	1.597	-2.469	-1.666	1.867	-2.504	-0.515	-0.2	-1.822	-2.112	-0.661	-0.486	-0.415	-0.627	-0.091	0.862	0.193	1.082	1.694	-0.448	0.349	0.515	1.176	-1.035	1.463	0.372	0.783	2.094	-1.424	2.323	0.927
1.979	1.405	0.965	0.017	-0.047	0.05	-2	-1.414	-0.956	2.695	1.41	1.096	1.206	1.314	0.798	3.182	1.49	0.102	3.068	0.549	1.692	2.902	2.407	1.56	0.802	2.198	0.145	0.614	1.404	1.74	0.764	-0.03	0.21	-0.741	-0.067	-0.107	-1.256	-1.458	-0.67	-0.843	0.734	-0.903	-1.319	0.308	0.737	-0.61	-1.673	-1.515	-2.682	-1.314
1.289	-1.223	-1.261	-0.901	-0.344	-0.099	-0.585	1.546	1.223	1.853	-1.664	-1.113	0.629	-0.765	-1.351	2.679	-1.321	-1.82	1.616	-2.767	-1.246	2.19	-1.392	-0.1	0.143	-1.151	-2.314	0.972	0.308	-1.502	-0.361	-0.88	-0.173	-1.344	0.26	-0.083	-0.722	1.554	0.417	-2.148	-0.026	0.624	-1.988	0.577	-0.925	0.276	1.793	-0.138	-0.493	1.471
-1.268	1.333	1.621	0.355	-0.156	0.231	1.009	-1.27	-1.718	-1.863	1.739	1.61	-0.62	0.869	1.576	-1.859	2.589	0.867	-2.009	2.22	2.606	-2.687	1.16	1.139	-0.688	0.018	2.249	0.265	1.392	1.91	-0.288	0.296	0.202	0.982	-0.632	0.267	1.064	-1.576	-0.982	0.791	-1.233	1.196	1.874	0.091	0.401	1.969	-2.188	-0.918	0.947	-0.925
0.778	-1.607	1.62	-0.037	0.443	0.262	-0.74	1.279	-1.797	0.552	-2.223	1.922	0.965	-0.93	1.262	1.353	-2.607	2.62	0.141	-2.948	1.165	-0.335	-1.887	2.532	1.801	-1.14	0.505	1.384	-0.164	1.959	-0.116	-0.266	0.436	0.055	1.149	0.061	-0.863	1.616	-1.082	1.112	1.338	-0.211	-0.219	1.829	0.919	-1.954	1.645	-0.812	-0.589	0.918
-0.247	2.435	-0.838	-0.095	-0.069	-0.067	0.27	-2.402	0.95	-0.711	2.995	-0.941	0.197	1.77	-0.695	-1.276	2.788	-1.864	-0.089	3.846	-1.253	-1.364	3.284	-0.089	0.971	2.05	0.146	0.761	1.457	-1.599	-0.582	0.453	-0.268	0.387	-0.599	0.154	-0.216	-1.79	0.828	1.203	-0.152	0.741	0.953	-0.91	-0.798	-0.631	-1.455	1.769	0.743	-2.917
-2.583	0.5	-0.281	0.004	0.011	-0.14	2.564	-0.517	0.349	-3.139	0.848	-0.615	-1.911	0.148	0.04	-3.988	0.103	-0.817	-2.815	1.309	-1.584	-3.588	1.633	0.026	-2.014	-0.929	0.002	-1.881	0.441	1.103	-0.521	0.444	-0.512	0.526	-0.414	0.228	1.978	-0.044	0.025	0.446	-1.435	0	0.279	-0.342	1.306	2.195	0.075	-1.047	3.027	-0.998
0.404	-2.294	0.464	-0.474	-0.105	0.126	-0.12	2.365	-0.493	0.995	-2.539	0.132	-0.249	-1.945	0.778	0.586	-2.92	-0.823	1.332	-3.389	0.729	1.88	-1.924	0.07	0.038	-1.732	1.811	-1.067	-2.762	0.754	-0.985	-0.665	0.237	0.028	0.452	0.038	-0.622	1.753	-0.314	0.741	0.174	-0.774	0.752	0.615	0.917	-1.299	1.713	-1.249	0.375	2.864
-1.139	1.865	1.382	0.084	0.094	-0.075	1.05	-1.945	-1.297	-1.094	2.217	2	-1.12	1.439	0.712	-1.821	3.071	2.041	-0.128	2.821	2.051	-1.199	1.619	2.916	-1.358	2.054	-0.159	-1.949	0.639	0.678	0.155	0.613	0.477	0.004	-0.428	-0.612	1.061	-1.463	-0.655	-0.158	-0.073	-1.681	-0.911	-0.937	-0.428	2.024	-0.813	-0.751	0.975	-2.352
1.294	1.647	-0.955	-0.072	-0.183	-0.584	-1.223	-1.499	1.356	1.371	2.188	-0.465	1.15	1.035	-1.452	2.331	2.613	-0.5	1.377	1.812	0.516	0.496	2.916	-0.579	1.988	0.311	-1.637	1.081	1.42	-2.488	-0.182	0.239	-1.17	0.033	-0.599	0.021	-1.256	-1.155	0.592	0.519	0.004	0.747	0.69	-1.453	-0.207	-2.068	-0.331	0.618	-1.11	-1.784
0.282	-2.37	-0.415	-0.795	0.067	-0.12	0.464	2.293	0.503	0.141	-3.05	-0.19	0.368	-1.59	-0.616	0.15	-3.093	0.868	0.964	-3.744	-0.561	-0.8	-3.406	-0.69	0.425	-1.57	-1.74	1.331	-1.215	-0.228	-0.771	-0.677	0.001	-0.686	0.796	-0.229	0.463	1.496	0.547	-1.696	1.255	0.061	-0.478	0.995	-1.317	0.315	1.258	1.645	0.429	2.993
2.016	1.016	1.394	0.072	0.102	-0.156	-2.077	-1.098	-1.282	2.197	1.575	1.786	1.764	0.417	0.92	3.082	1.569	2.477	1.373	1.909	2.433	2.488	2.337	1.029	1.474	-0.3	1.692	2.5	0.052	0.318	0.479	0.742	0.022	-0.355	-0.529	-0.322	-1.712	-0.417	-1.023	-0.595	-1.229	0.582	0.429	-1.091	-0.993	-2.389	0.118	-0.364	-2.351	-1.744
-0.88	-0.184	-2.289	0.263	-0.286	0.025	0.721	0.305	2.314	-1.366	0.157	-2.678	-0.356	-0.527	-1.813	-2.203	0.489	-2.037	-1.788	-0.365	-3.53	-0.967	1.121	-3.131	0.721	-0.53	-2.029	-0.625	-1.61	-1.766	-0.256	0.069	-0.391	0.768	-0.665	0.48	0.678	-0.437	1.988	1.77	-0.399	0.071	0.687	-1.701	0.226	-0.441	-0.675	2.181	0.783	0.99
0.821	0.439	2.293	-0.408	0.051	0.037	-0.588	-0.478	-2.325	1.441	0.302	2.662	0.153	0.544	1.815	2.334	0.581	2.09	1.462	-0.79	2.962	1.462	0.89	3.66	0.168	1.581	1.623	-0.733	0.3	2.43	0.037	-0.273	0.551	-0.856	0.374	-0.478	-1.18	-0.377	-1.792	-0.484	1.396	-0.685	-1.869	0.503	0.03	-1.544	-1.409	-1.633	-0.017	-0.542
1.458	1.405	-1.632	0.021	0.114	0.049	-1.45	-1.452	1.616	1.4	1.826	-2.224	1.447	0.952	-0.982	0.692	2.648	-2.152	1.14	1.118	-2.977	2.404	2.156	-2.472	1.882	1.502	-0.119	2.002	-0.012	-1.125	0.04	0.559	-0.586	0.007	-0.332	0.69	-1.339	-0.993	0.958	0.317	0.28	1.558	0.704	-1.215	0.543	-2.15	-0.217	0.876	-1.479	-1.846
0.047	-0.894	-2.176	-0.207	0.829	-0.186	0.06	0.196	2.368	-0.115	-0.994	-2.857	0.174	-0.694	-1.406	0.683	-1.52	-3.417	-0.415	-0.197	-3.559	-0.922	-1.815	-2.88	1.271	-0.525	-1.295	0.043	-1.617	-0.809	-0.493	0.556	-0.846	0.071	0.976	0.509	-0.421	0.184	1.737	-0.158	2.012	0.788	1.203	0.956	0.46	-1.386	0.575	2.031	0.541	0.24
-1.186	-1.103	-1.084	-0.109	0.915	-0.426	1.228	0.294	1.432	-1.915	-1.2	-0.96	-0.398	-0.937	-1.195	-2.233	-1.155	0.084	-2.044	-2.103	-1.49	-2.498	-0.348	-1.451	-0.136	-1.244	-2.232	0.286	-1.479	-0.488	-0.022	0.578	-1.076	-0.192	1.131	0.271	0.422	0.334	1.418	-1.215	1.159	0.637	0.21	2.187	0.383	0.178	0.881	2.373	1.94	0.289
0.494	0.395	-2.404	-0.13	-0.343	0.038	-0.416	-0.187	2.399	1.002	0.741	-2.836	-0.033	0.042	-1.858	0.684	0.699	-3.953	1.976	0.196	-2.712	1.02	1.804	-2.459	0.07	-1.046	-2.163	-1.063	0.386	-2.083	0.267	0.186	-0.338	-0.52	-0.868	0.42	-0.441	-0.932	2.036	-0.224	-1.9	0.049	-1.62	-0.82	0.144	-1.398	-1.403	2.381	-0.403	0.504
1.051	-0.514	-2.192	-0.219	0.316	-0.25	-0.931	0.333	2.353	1.653	-0.895	-2.158	0.38	-0.05	-2.148	2.051	-1.039	-3.181	1.49	-1.908	-1.774	2.541	-0.412	-1.632	-0.451	-0.86	-2.302	0.453	0.643	-2.992	0.09	0.715	-0.827	-0.522	-0.095	0.331	-0.833	0.73	1.632	0.248	-0.886	0.581	-1.496	-0.565	-0.032	0.086	1.391	1.776	-1.007	-0.079
-1.458	1.907	0.352	0.636	0.377	-0.48	0.915	-2.237	0.064	-1.637	2.454	0.78	-1.193	1.295	-0.109	-2.756	2.549	0.775	-1.192	3.403	0.41	-1.18	2.459	1.845	-1.546	1.536	-1.155	-1.635	0.375	0.276	0.386	1.055	-0.215	0.808	-0.344	-0.67	0.829	-1.504	0.374	1.826	-0.358	-1.244	0.071	-0.607	-1.479	1.695	-1.242	0.987	0.994	-2.864
-2.198	-0.388	-0.529	0.104	0.334	-0.35	2.09	0.184	0.735	-2.628	-0.334	0.046	-1.649	-0.421	-1.118	-2.839	0.659	0.407	-2.232	-0.958	0.925	-3.596	-0.811	-0.306	-1.855	0.39	-1.886	-1.871	-1.47	-1.602	-0.124	-0.241	-0.78	0.315	0.912	0.077	1.78	0.817	0.296	-0.169	0.909	1.111	0.119	1.832	-0.491	2.266	0.81	-0.673	2.289	-0.42
-0.166	1.285	2.214	0.043	-0.099	0.107	0.143	-1.246	-2.315	0.211	1.515	2.776	-0.51	0.979	1.55	0.905	2.335	2.486	0.634	0.785	3.471	-0.498	1.972	3.398	-0.874	1.852	0.984	-1.377	0.391	1.947	0.421	0.204	0.698	-0.33	-0.412	-0.492	0.501	-0.969	-1.659	-0.863	0.453	-0.95	-1.049	-1.151	-0.135	1.253	-0.221	-2.009	-0.244	-1.466
1.505	-1.064	-0.907	-0.91	-0.331	-0.433	-0.753	1.384	1.221	1.891	-1.635	-1.109	1.011	-0.484	-0.678	2.844	-1.331	-1.576	1.366	-2.432	-1.698	2.238	-2.222	-0.185	0.892	0.351	-1.472	1.454	0.2	0.082	-0.42	-0.889	-0.371	-1.294	0.299	-0.471	-0.861	1.535	0.441	-2.278	0.188	-0.089	-1.401	0.65	-1.511	0.091	2.003	0.128	-0.661	1.175
-1.615	1.713	-0.158	-0.012	-0.182	0.476	1.638	-1.615	-0.114	-1.869	2.01	-0.729	-1.276	1.344	0.427	-1.108	2.424	-1.35	-2.606	2.842	-0.47	-2.539	1.311	-1.315	-1.991	0.77	1.058	-0.844	2.084	1.128	-0.221	0.358	-0.053	0.184	-0.718	1.013	1.009	-1.875	0.346	-0.754	-1.199	1.355	0.769	-0.292	1.803	1.296	-2.531	1.183	2.203	-1.324
0.615	-2.065	1.079	-0.153	0.315	0.321	-0.592	1.864	-1.282	0.949	-2.696	0.846	0.237	-1.336	1.264	1.074	-3.447	1.654	1.925	-2.351	0.504	0.525	-3.324	0.073	0.857	-0.826	2.036	-0.778	-1.536	1.691	0.089	-0.353	0.072	-0.424	0.984	0.556	-1.028	1.79	-0.609	0.322	1.538	1.061	-1.157	0.769	1.386	-1.976	1.325	-0.858	-0.15	1.886
-2.01	1.479	-0.483	-0.08	-0.052	-0.005	2.054	-1.477	0.481	-2.669	1.728	-0.223	-1.293	1.153	-0.694	-3.45	0.967	-0.411	-2.805	2.671	-0.841	-2.562	2.04	0.842	-0.504	1.9	-0.867	-1.424	0.744	-1.725	-0.778	0.039	0.142	0.638	-0.155	-0.16	1.261	-1.342	0.648	1.07	0.876	0.105	0.727	-0.423	-1.226	1.273	-1.125	1.828	2.753	-1.548
-2.465	0.966	-0.251	-0.033	-0.131	-0.197	2.473	-0.873	0.343	-2.809	1.621	-0.341	-2.021	0.285	-0.188	-3.799	1.39	0.133	-2.906	1.889	-1.408	-2.334	2.358	0.275	-2.516	-0.467	-0.765	-1.965	-0.022	0.839	-0.499	0.329	-0.621	0.437	-0.605	0.222	1.974	-0.363	-0.039	0.206	-1.706	0.184	0.334	-0.169	1.249	2.218	-0.517	-1.145	2.855	-1.354
0.11	-2.354	0.252	-0.39	-0.037	0.059	0.162	2.318	-0.295	0.707	-2.63	-0.035	-0.544	-2.002	0.532	0.721	-2.461	-1.151	0.772	-3.649	0.251	1.672	-2.18	0.31	-0.548	-1.877	1.667	-1.403	-2.504	0.262	-0.887	-0.569	-0.112	0.126	0.494	0.221	-0.356	1.737	-0.449	1.118	0.147	-0.109	0.112	0.674	1.344	-0.52	1.554	-1.478	0.678	2.782
-0.394	1.681	1.925	0.004	0.07	0	0.346	-1.697	-1.92	-0.44	1.628	2.645	-0.333	1.67	1.139	-0.406	2.647	3.146	0.371	1.032	3.102	-1.398	1.226	2.931	0.495	2.292	0.689	-1.198	1.968	0.547	-0.091	0.185	0.758	0.076	-0.042	-0.754	0.226	-1.553	-1.128	0.911	0.5	-1.142	-0.792	0.424	-1.287	1.124	-1.94	-0.596	0.447	-1.754
1.687	1.332	-0.972	-0.03	-0.183	-0.48	-1.676	-1.232	1.246	1.82	1.912	-0.544	1.458	0.682	-1.418	2.835	2.188	-0.867	1.988	1.72	0.518	1.176	2.756	-0.755	2.045	-0.199	-1.108	1.543	1.043	-2.43	0.032	0.108	-1.173	-0.103	-0.478	0.202	-1.393	-1.127	0.472	0.246	0.264	0.96	0.727	-1.284	0.316	-2.232	-0.53	0.017	-1.858	-1.299
0.061	-2.184	-0.797	-0.94	0.183	-0.04	0.717	2.058	0.799	0.072	-2.874	-0.64	-0.013	-1.392	-0.921	0.355	-3.109	0.446	0.836	-3.365	-1.253	-0.862	-3.464	-0.784	-0.285	-1.227	-1.967	1.024	-0.971	-0.812	-1.054	-0.566	-0.101	-0.704	0.937	0.006	0.525	1.276	0.834	-1.62	1.203	0.532	-0.626	1.431	-1.028	0.332	1.036	1.862	0.832	2.754
1.87	1.188	1.338	0.032	-0.061	0.025	-1.915	-1.145	-1.354	2.491	1.535	1.253	1.177	0.782	1.361	2.909	1.89	2.215	2.382	2.504	0.625	3.191	0.804	0.768	0.404	1.489	1.778	1.313	-0.056	2.051	0.72	0.295	-0.023	-0.672	-0.396	0.074	-1.304	-0.609	-1.31	-1.333	0.179	0.783	-0.511	-1.385	0.498	-1.74	0.329	-1.69	-2.448	-1.648
-1.033	-0.543	-2.24	0.336	-0.222	-0.001	0.839	0.645	2.217	-1.606	-0.267	-2.656	-0.4	-0.779	-1.753	-2.443	-0.119	-1.874	-2.035	-1.054	-3.294	-1.31	0.627	-3.23	0.624	-0.884	-2.311	-0.719	-1.769	-1.341	-0.23	0.073	-0.461	0.894	-0.537	0.476	0.863	-0.158	1.937	1.865	-0.351	-0.048	0.681	-1.629	0.499	-0.069	-0.579	2.432	0.825	1.368
0.968	0.531	2.133	-0.339	-0.333	0.115	-0.77	-0.358	-2.2	1.555	0.863	2.315	0.351	0.163	1.855	1.609	1.819	1.832	2.516	0.32	2.126	1.443	1.052	3.401	-0.564	0.701	2.08	0.211	-0.82	2.352	0.376	-0.072	0.359	-1.057	-0.603	-0.135	-0.99	-0.953	-1.643	-1.702	0.318	-0.066	-1.438	-1.463	0.453	-0.117	-1.642	-1.753	-0.573	0.21
2.143	1.226	-0.783	0.046	0.035	0.094	-2.143	-1.251	0.731	2.353	1.714	-1.273	1.837	0.686	-0.264	1.979	2.751	-1.071	2.002	1.485	-2.3	3.494	1.773	-1.306	2.058	1.033	0.747	2.331	-0.276	-0.329	0.365	0.498	-0.434	-0.272	-0.42	0.625	-1.749	-0.615	0.354	-0.248	-0.02	1.679	0.291	-1.415	0.574	-2.344	0.29	0.679	-2.418	-1.836
0.691	-1.469	-1.217	0.218	1.064	-0.55	-0.892	0.655	1.628	0.517	-2.01	-1.713	0.83	-0.805	-0.721	1	-2.933	-1.317	1.195	-1.8	-2.641	-0.56	-2.213	-1.929	1.92	-0.743	-0.391	0.301	-1.112	0.212	0.256	0.545	-1.126	0.144	1.479	0.096	-1.019	1.147	0.981	0.042	2.525	-0.263	1.114	1.487	0.685	-1.372	2.108	1.574	-0.705	0.209
0.567	-1.716	-0.866	-0.445	0.404	-0.761	-0.159	1.397	1.477	0.123	-2.26	-0.837	0.994	-1.044	-0.929	-0.644	-2.321	0.023	0.72	-3.168	-0.585	-0.392	-2.477	-1.73	1.796	-1.297	-1.665	1.553	-0.838	0.032	0.177	0.2	-1.214	-0.981	0.554	-0.212	-0.619	0.717	1.255	-1.705	-0.365	-0.276	-1.512	1.501	-0.464	-1.545	0.812	1.911	0.247	2.022
0.394	0.023	-2.405	0.144	-0.431	0.142	-0.461	0.223	2.321	0.654	0.439	-2.928	0.141	-0.401	-1.776	0.178	0.131	-3.894	1.748	0.51	-2.899	0.354	1.491	-2.745	0.527	-1.465	-1.843	-0.913	-0.467	-1.911	0.468	0.043	-0.343	-0.181	-0.903	0.637	0.037	-0.388	2.079	0.208	-1.941	0.424	-1.254	-1.006	0.461	-0.175	-1.246	2.742	-0.927	0.758
1.333	-0.444	-1.906	-0.071	0.401	-0.292	-1.255	0.181	2.084	1.748	-1.019	-1.743	0.861	0.201	-2.012	2.298	-1.302	-2.672	1.057	-1.872	-1.469	2.343	-0.868	-0.867	0.117	0.05	-2.772	1.537	0.948	-2.419	0.279	0.908	-0.773	-0.42	-0.105	0.187	-1.006	0.627	1.426	0.242	-0.911	0.583	-1.336	-0.592	-0.338	-0.39	1.394	1.753	-1.438	-0.283
-2.061	1.051	0.49	0.325	0.588	-0.622	1.763	-1.555	0.07	-2.616	1.547	0.534	-1.407	0.561	0.413	-3.452	1.185	1.149	-2.973	1.696	-0.581	-2.245	2.456	1.024	-1.777	-0.337	-0.173	-1.029	0.171	1.422	-0.182	1.108	-0.311	0.78	-0.021	-0.828	1.123	-1.092	0.24	1.686	0.374	-1.219	0.324	-0.534	-1.657	1.332	-0.638	1.242	2.343	-1.936
-2.242	-0.125	-0.165	0.052	-0.096	-0.331	2.241	0.191	0.384	-2.619	0.306	0.288	-1.749	-0.588	-0.619	-2.362	1.388	0.22	-2.525	0.061	1.305	-3.614	-0.035	-0.017	-1.75	-0.131	-1.602	-2.331	-1.513	-0.729	-0.3	-0.742	-0.232	0.407	0.549	-0.434	1.929	0.414	-0.296	0.077	1.341	0.289	0.094	0.911	-1.446	2.251	-0.348	-1.045	2.463	-0.007
-0.148	2.438	0.959	0.073	0.039	0.028	0.095	-2.483	-0.967	0.204	2.967	1.308	-0.46	1.814	0.569	1.045	3.428	0.804	0.605	2.659	2.323	-0.614	3.724	1.399	-0.932	2.096	-0.407	-1.328	1.429	1.17	0.483	0.611	0.364	-0.34	-0.557	-0.302	0.464	-1.871	-0.55	-0.694	-0.142	-1.293	-1.204	-0.638	0.312	1.303	-1.61	-1.185	-0.307	-2.98
0.835	-1.867	-0.163	0.129	0.604	-0.989	-0.851	1.448	1.004	0.714	-2.577	-0.288	0.914	-1.068	-0.068	0.832	-2.811	-1.346	-0.267	-2.837	-0.048	1.397	-3.234	0.29	1.971	-0.815	-0.231	0.733	-0.702	0.885	0.098	-0.198	-1.045	0.196	1.378	-0.799	-0.175	1.749	0.656	-0.67	1.788	-1.403	1.218	1.78	-1.01	0.539	1.206	1.37	-1.461	1.15
-1.746	1.525	0.912	0.199	-0.191	0.389	1.629	-1.444	-1.159	-2.378	1.775	0.655	-1.04	1.169	1.128	-2.224	2.25	-0.371	-2.632	2.652	1.25	-3.168	1.009	0.787	-1.161	0.967	2.205	-0.418	2.022	1.18	-0.55	0.031	0.257	0.942	-0.403	0.523	1.461	-1.631	-0.407	0.968	-0.776	1.546	1.639	0.454	0.458	2.337	-2.147	0.056	1.766	-1.215
-0.268	-1.827	1.523	-0.375	0.291	0.079	0.477	1.586	-1.626	0.214	-2.32	1.843	-0.736	-1.254	1.134	-0.365	-3.116	2.318	0.881	-1.863	2.631	0.84	-2.719	1.054	-1.326	-0.681	1.853	-1.552	-1.691	0.595	0.135	-0.222	0.412	-0.895	0.787	-0.278	-0.292	1.303	-1.6	-1.172	1.664	0.407	-1.749	0.185	-0.515	-0.392	0.581	-2.366	1.168	1.815
-2.342	0.499	-1.061	0.122	-0.077	-0.202	2.251	-0.467	1.167	-3.014	0.241	-0.989	-1.572	0.712	-1.112	-3.297	0.067	0.09	-3.298	-0.598	-1.633	-3.69	1.091	-1.165	-1.38	1.762	-0.705	-1.203	0.69	-2.124	-0.68	-0.236	-0.194	0.923	0.089	-0.198	1.715	-0.86	0.68	1.018	1.149	0.167	1.282	-0.043	-1.261	1.091	-1.476	1.311	2.702	-0.059
-2.626	0	-0.484	-0.014	0.022	-0.051	2.638	-0.024	0.518	-3.197	0.374	-0.737	-1.941	-0.363	-0.221	-4.189	-0.171	-0.481	-3.131	0.451	-1.857	-3.28	1.441	-0.436	-1.913	-1.407	-0.612	-1.97	-0.458	0.863	-0.608	0.312	-0.491	0.586	-0.282	0.37	2.005	0.186	0.056	0.645	-1.374	0.323	0.293	0.004	1.443	2.195	-0.26	-0.965	3.153	-0.237
0.326	-2.091	1.082	-0.327	-0.177	-0.11	-0.135	2.209	-0.989	0.982	-2.342	0.973	-0.383	-1.773	1.144	1.098	-2.762	-0.056	1.169	-3.209	1.661	1.664	-1.497	1.27	-0.411	-1.198	2.036	-1.246	-2.579	1.04	-0.758	-0.81	-0.114	0.093	0.475	-0.108	-0.436	1.472	-1.093	1.123	0.184	-0.283	0.053	1.038	0.862	-0.307	1.149	-2.156	0.174	2.839
-1.129	1.873	1.334	-0.012	-0.046	0.028	1.163	-1.83	-1.365	-1.503	2.05	1.957	-0.724	1.631	0.661	-1.866	3.071	1.959	-0.834	1.861	2.819	-2.353	1.289	2.056	0.327	1.981	0.687	-1.296	1.934	-0.259	-0.53	0.105	0.487	0.508	-0.203	-0.441	0.818	-1.692	-0.658	1.441	0.366	-0.231	0.198	0.196	-1.376	1.396	-2.15	0.227	1.488	-1.896
-0.267	2.269	-0.81	-0.043	-0.078	-0.432	0.253	-2.226	1.069	-0.481	2.699	-0.26	-0.071	1.726	-1.389	-0.143	3.707	-0.647	0.166	2.46	0.624	-1.561	2.622	0.136	0.973	1.797	-1.574	-0.571	2.099	-2.238	-0.41	0.256	-1.038	0.32	-0.4	0.18	-0.074	-1.888	0.415	0.237	0.169	1.164	1.39	-0.409	-0.234	-1.141	-1.93	0.528	0.567	-2.478
1.104	-2.099	-0.347	-0.627	-0.013	-0.554	-0.537	2.17	0.871	1.194	-2.771	-0.543	0.931	-1.35	-0.157	0.427	-3.461	-0.043	2.209	-3.151	-0.202	1.125	-2.824	-1.62	1.594	-0.716	-0.7	1.158	-1.253	0.895	-0.525	-0.784	-0.47	-0.634	0.78	-0.525	-0.29	1.415	0.808	-1.681	1.014	-0.902	0.011	1.103	-1.426	-0.915	0.743	1.508	-0.776	2.866
2.097	-0.116	1.5	-0.07	0.096	0.021	-2.086	0.059	-1.491	2.748	-0.375	1.488	1.344	0.152	1.441	3.523	0.255	1.895	3.279	-0.711	0.587	2.735	-1.264	2.134	1.386	1.274	1.417	0.781	-0.247	2.302	0.586	-0.272	0.11	-0.744	0.457	-0.066	-1.383	-0.216	-1.292	-0.477	1.525	-0.287	-1.308	0.373	0.885	-0.669	-0.038	-2.101	-2.7	0.347
-0.995	-0.61	-2.193	0.021	-0.264	0.19	0.939	0.782	2.081	-1.528	-0.345	-2.613	-0.417	-0.84	-1.678	-2.476	-0.536	-2.089	-1.539	-0.933	-3.555	-1.469	0.781	-2.883	0.555	-0.901	-2.187	-0.601	-1.894	-1.388	-0.288	0.072	-0.381	0.317	-0.605	0.791	0.37	0.181	2.048	1.349	-0.838	0.369	-0.2	-1.543	0.992	-0.583	0.532	2.533	1.451	1.317
1.737	0.1	1.633	-0.265	-0.258	0.152	-1.578	0.062	-1.73	2.418	0.298	1.605	0.981	-0.12	1.581	2.593	1.285	1.089	3.048	-0.539	1.149	2.758	0.512	2.639	0.29	0.58	2.176	0.888	-1.06	2.075	0.481	-0.064	0.163	-1.007	-0.445	0.142	-1.556	-0.569	-1.255	-1.604	0.192	0.843	-1.081	-1.453	0.616	-0.948	-1.3	-1.772	-1.574	0.672
1.012	2.135	-1.074	-0.062	-0.085	-0.208	-0.956	-2.094	1.282	0.845	2.778	-1.386	1.116	1.394	-0.722	0.168	3.382	-0.781	0.403	2.676	-2.388	1.754	3.4	-1.505	1.635	1.533	0.236	1.851	0.865	-1.414	-0.161	0.619	-0.465	0.042	-0.775	0.072	-1.081	-1.341	0.977	0.928	-0.774	0.729	0.146	-1.538	-0.686	-1.353	-0.6	1.788	-0.771	-2.78
0.051	-1.501	-1.453	0.983	0.229	0.219	-0.855	1.39	1.327	0.226	-1.781	-2.066	-0.085	-1.144	-0.763	-0.463	-2.585	-2.397	1.286	-2.065	-2.186	0.079	-1.102	-2.938	0.036	-1.871	0.051	-1.143	-0.8	-0.715	0.962	-0.093	-0.465	0.88	0.556	0.888	-0.168	1.648	1.023	1.9	1.012	1.296	0.655	-0.216	1.643	0.178	2.521	1.716	-1.431	1.106
1.238	-1.331	-0.846	-0.403	0.359	-0.736	-0.837	1.08	1.511	1.033	-2.007	-0.974	1.39	-0.55	-0.727	0.352	-2.293	-0.188	1.927	-2.709	-0.897	0.568	-2.254	-1.988	2.245	-0.273	-1.387	1.736	-0.376	0.327	0.296	0.452	-1.046	-1.023	0.225	-0.309	-0.97	0.37	1.226	-1.457	-0.669	-0.545	-1.789	0.894	-0.709	-1.963	-0.067	1.592	-0.694	1.763
0.131	-1.373	-2.034	0.435	0.104	0.106	-0.386	1.32	1.956	-0.322	-1.774	-2.414	0.57	-0.922	-1.56	0.054	-1.693	-3.445	-1.328	-1.305	-2.25	-0.359	-2.823	-2.053	0.95	-0.164	-2.251	1.507	-1.467	-1.275	-0.034	-0.384	-0.267	0.892	0.605	0.457	0.105	1.602	1.383	1.364	1.273	-0.313	1.698	0.057	1.047	0.704	2.463	1.753	-0.776	1
0.091	-0.563	-2.301	-0.452	0.063	-0.144	0.172	0.518	2.4	0.75	-0.497	-2.528	-0.631	-0.585	-1.978	0.95	-1.123	-3.404	1.52	-0.888	-1.784	1.006	0.54	-2.903	-0.942	-1.66	-1.767	-1.313	-0.223	-2.785	-0.859	0.307	-0.733	-0.042	-0.181	0.461	-0.263	0.764	1.749	1.021	-0.129	0.166	-0.28	-1.213	0.69	-0.024	1.862	1.602	0.588	0.233
-1.887	1.368	0.198	0.154	-0.233	0.911	1.754	-1.205	-0.99	-2.606	1.496	0.35	-1.098	1.167	0.084	-2.858	2.367	-0.248	-2.753	1.781	1.395	-3.256	0.665	0.101	-0.416	2.033	0.209	-0.996	0.849	-0.927	-0.595	0.022	1.03	0.877	-0.441	0.659	1.042	-0.932	-0.791	1.103	-1.335	1.41	1.626	0.362	0.848	0.137	-1.531	-1.102	2.42	-1.475
-2.074	-0.68	0.685	-0.129	-0.147	-0.472	2.134	0.757	-0.361	-2.197	-0.39	1.313	-1.864	-0.998	-0.015	-1.857	0.698	1.242	-1.649	-0.91	2.199	-3.259	-0.384	1.6	-2.376	-0.482	-0.864	-2.256	-2	0.108	-0.393	-0.874	-0.49	0.144	0.595	-0.451	1.552	0.856	-0.891	-0.085	0.874	0.572	-0.515	1.179	-1.151	1.792	0.302	-1.823	2.589	0.637
0.507	2.338	0.86	-0.108	-0.068	0.189	-0.478	-2.328	-0.971	1.102	2.752	0.829	-0.109	1.809	0.883	1.555	2.654	-0.132	1.821	2.652	1.656	0.744	3.822	0.958	-0.766	2.191	0.059	-0.58	1.765	1.862	0.387	0.342	0.599	-0.614	-0.506	-0.217	-0.057	-1.823	-0.524	-0.925	0.016	-1.174	-1.52	-0.538	0.427	0.995	-1.781	-0.959	-0.91	-2.719
0.934	-1.726	-0.519	-0.04	0.596	-0.835	-0.8	1.291	1.332	0.964	-2.324	-0.925	0.863	-1.034	-0.114	1.528	-2.153	-1.861	-0.118	-2.741	-1.174	1.47	-3.144	-0.384	1.872	-0.523	-0.058	0.398	-1.185	0.889	0.043	-0.146	-0.974	-0.081	1.304	-0.545	-0.19	1.622	0.93	-0.983	1.706	-1.078	0.769	1.838	-1.028	0.7	1.389	1.46	-1.348	0.949
-1.617	0.816	1.665	0.079	-0.371	0.021	1.6	-0.594	-1.719	-2.194	1.227	1.756	-0.98	0.367	1.465	-2.03	2.26	1.411	-2.353	1.325	2.85	-3.162	0.895	1.381	-1.112	-0.711	1.849	-0.141	0.765	2.121	-0.426	0.216	0.012	0.6	-0.967	0.027	1.123	-1.182	-1.413	0.161	-1.867	0.474	1.442	-0.663	0.685	1.61	-2.19	-1.47	2.035	-0.019
-0.884	-2.004	1.109	-0.217	0.024	-0.375	1.048	2.027	-0.889	-0.637	-2.364	1.704	-1.063	-1.567	0.46	-1.506	-3.024	1.944	-0.539	-1.676	2.508	0.268	-2.942	1.433	-2.021	-1.051	0.656	-1.431	-2.23	-0.347	0.045	-0.586	0.014	-0.479	0.647	-0.771	0.536	1.647	-1.389	-1.142	1.145	-0.127	-0.99	0.151	-1.632	1.202	1.023	-2.112	1.476	2.345
-2.438	0.02	-1.063	-0.002	0.018	0.007	2.419	-0.047	1.075	-3.125	-0.284	-1.049	-1.664	0.311	-1.004	-3.696	0.282	-0.347	-3.117	-1.321	-0.74	-3.578	-0.212	-2.09	-1.696	1.38	-0.99	-1.152	0.13	-2.004	-0.697	-0.212	0.055	0.695	0.249	-0.037	1.695	-0.443	0.935	0.734	1.316	0.227	1.118	0.17	-1.086	1.177	-0.444	1.928	3.04	0.354
-2.346	0.746	-0.791	-0.059	-0.139	0.105	2.361	-0.697	0.737	-2.613	1.272	-1.241	-1.979	0.185	-0.303	-3.706	1.172	-1.362	-2.117	1.28	-2.24	-2.518	2.296	-0.744	-2.139	-0.773	-0.74	-2.437	0.173	0.672	-0.476	0.429	-0.212	0.353	-0.706	0.425	1.756	-0.151	0.59	0.34	-1.574	-0.196	-0.05	-1.042	1.409	2.049	0.414	-0.358	2.848	-1.255
1.32	-1.402	1.3	-0.219	0.032	0.423	-1.169	1.324	-1.528	1.717	-1.744	0.853	0.83	-1.013	1.733	1.261	-2.444	0.095	2.455	-2.307	1.565	2.392	-1.011	0.283	1.343	-0.177	2.238	0.264	-1.633	2.502	-0.376	-0.404	1.024	-0.054	0.445	-0.184	-1.255	0.688	-1.024	0.688	0.076	-0.93	0.386	1.375	0.223	-1.548	-0.125	-1.696	-1.02	1.902
-0.946	2.091	1.236	-0.095	-0.08	0.066	0.986	-2.022	-1.288	-1.177	2.328	1.853	-0.659	1.753	0.568	-1.306	3.386	1.708	-0.506	2.058	2.73	-2.162	1.842	2.221	0.087	2.536	0.222	-1.503	1.835	-0.08	-0.054	0.33	0.741	-0.14	-0.491	-0.614	0.796	-1.691	-0.54	0.325	0.216	-1.413	-1.237	-0.572	-0.901	1.758	-1.549	-0.033	1.099	-2.251
-0.844	1.451	-1.774	-0.123	-0.243	-0.19	0.898	-1.389	1.865	-0.86	2.113	-1.57	-0.835	0.668	-1.922	-0.99	2.833	-2.452	0.129	2.469	-1.141	-1.693	2.429	-0.843	0.15	0.474	-2.472	-1.729	0.484	-2.636	-0.743	-0.202	-0.653	0.503	-0.295	0.275	0.316	-1.403	1.312	0.727	0.748	0.611	1.32	-0.551	-0.493	-0.586	-1.153	1.962	1.452	-1.338
0.971	-2.252	-0.179	0.158	0.17	-0.653	-1.09	2.098	0.707	0.834	-2.934	-0.268	1.059	-1.477	-0.124	-0.061	-3.237	0.278	1.749	-3.453	0.198	0.691	-3.181	-1.383	2.139	-1.327	-0.558	0.926	-1.165	0.99	0.074	-0.6	-0.842	0.229	0.91	-0.384	-1.021	1.319	0.554	0.259	1.531	-1.259	1.174	1.105	0.201	-1.994	1.057	0.065	-1.087	2.812
2.248	0.166	1.337	-0.105	0.139	0.083	-2.159	-0.235	-1.391	2.763	-0.265	1.629	1.639	0.585	0.99	3.506	0.363	2.165	3.305	-0.938	0.977	2.351	-0.974	2.375	1.987	1.176	0.131	1.225	1.35	1.694	0.34	-0.207	0.576	-0.557	0.495	-0.419	-1.523	-0.518	-0.965	0.059	0.975	-1.217	-1.032	1.306	0.213	-1.057	-1.305	-1.63	-2.693	0.081
-1.318	0.375	-1.921	-0.19	0.486	0.475	1.453	-0.802	1.612	-1.201	0.523	-2.647	-1.38	0.22	-1.093	-2.035	0.249	-3.324	-0.295	0	-3.05	-0.949	1.643	-2.695	-1.748	-0.818	-0.979	-2.202	0.877	-0.776	-0.161	0.629	-0.247	-0.214	0.29	1.201	1.112	-0.13	1.869	-0.939	-0.517	1.419	-0.642	1.216	1.679	1.814	0.702	1.888	1.717	-1.421
2.436	0.039	-0.579	-0.056	-0.341	0.203	-2.376	0.172	0.354	2.907	0.475	-0.932	1.858	-0.388	-0.221	2.99	1.43	-0.255	2.618	0.711	-1.917	3.824	-0.073	-0.902	2.131	-0.57	0.834	1.883	-1.408	-0.705	0.469	0.137	-0.081	-0.569	-0.827	0.454	-2.026	-0.518	0.122	-0.438	-0.946	1.566	-0.349	-1.88	0.217	-2.129	-0.756	-1	-2.624	0.811
0.353	2.381	-1.185	0.014	-0.03	-0.074	-0.377	-2.34	1.226	0.254	3.099	-1.059	0.43	1.564	-1.249	0.813	3.389	-0.117	-0.861	3.383	-1.098	0.681	3.666	-1.845	1.47	1.326	-1.383	-0.084	1.313	-2.215	-0.148	0.744	-0.093	0.169	-0.798	-0.07	-0.522	-1.55	1.113	1.262	-0.922	-0.033	-0.132	-1.256	-0.976	-0.073	-1.065	1.977	-0.21	-3.029
1.846	-0.014	-1.738	0.176	-0.267	0.25	-1.944	0.199	1.556	2.349	0.435	-2.006	1.272	-0.482	-1.36	2.578	0.129	-3.026	3.366	0.411	-1.576	2.126	1.514	-1.953	1.605	-1.508	-1.397	0.387	-0.384	-2.033	0.854	-0.049	0.064	-0.499	-0.467	0.413	-1.147	0.325	1.557	-0.48	-1.52	0.751	-1.207	-0.497	-0.452	-0.764	0.007	2.493	-2.641	0.046
0.774	-1.82	0.63	-0.962	-0.102	0.182	0.031	1.909	-0.822	1.018	-1.929	1.289	0.423	-1.653	-0.076	1.282	-1.065	1.855	1.964	-2.513	1.01	0.363	-2.553	1.964	0.279	-2.585	-0.55	1.249	-1.085	-0.577	-0.869	-0.813	-0.13	-0.906	0.62	0.462	0.12	1.589	-0.074	-0.748	0.612	1.59	-1.897	0.956	0.38	0.08	2.388	0.649	-0.112	2.159
-0.347	-2.38	-0.728	-0.364	0.153	0.086	0.599	2.271	0.662	-0.064	-3.056	-0.609	-0.604	-1.616	-0.793	-0.865	-3.741	-1.058	0.026	-3.346	0.522	0.897	-3.085	-1.19	-1.736	-1.555	-0.713	-0.359	-1.239	-1.845	-0.014	-0.532	0.194	-0.701	0.837	-0.029	-0.168	2.023	0.801	-1.761	0.722	0.211	-0.633	1.105	-1.057	-0.921	2.851	0.668	1.289	2.444
0.877	0.019	-2.171	-0.339	0.173	-0.214	-0.687	-0.209	2.285	1.576	0.263	-2.164	0.105	-0.215	-2.097	1.946	-0.025	-3.163	2.205	-0.22	-1.411	1.572	1.382	-2.083	0.021	-1.295	-2.152	-0.477	0.144	-2.999	-0.648	0.368	-0.882	-0.04	-0.059	0.434	-1.064	-0.069	1.567	0.748	0.706	0.656	0.417	-1.073	0.389	-1.516	0.953	1.818	-0.293	-0.347
-1.159	2.085	-0.263	-0.479	-0.51	-0.533	1.486	-1.629	0.785	-1.26	2.694	-0.625	-1.057	1.367	0.092	-1.214	3.651	-0.075	-2.16	2.524	-1.248	-0.408	2.812	-1.389	-1.881	1.171	0.74	-0.151	1.557	0.734	-0.75	0.151	-0.784	-0.165	-1.104	-0.184	1.249	-0.979	0.377	-0.029	-1.788	-1.089	-0.84	-1.519	0.633	1.929	-0.834	-0.421	1.624	-2.225
-2.29	-0.345	0.365	-0.013	0.082	-0.358	2.28	0.282	-0.169	-2.638	0.025	0.889	-1.838	-0.718	-0.198	-2.358	1.131	0.802	-2.42	-0.376	1.943	-3.698	-0.136	0.656	-2.161	-0.549	-1.239	-2.034	-1.764	0.139	-0.352	-0.563	-0.08	0.316	0.708	-0.65	1.844	0.562	-0.802	0.091	1.473	0.103	-0.078	1.034	-1.677	1.961	-0.067	-1.629	2.61	0.029
0.56	2.052	1.422	0.043	0.024	-0.039	-0.611	-2.076	-1.375	0.832	2.257	2.064	0.279	1.753	0.735	1.976	2.107	2.005	0.464	1.809	2.997	0.593	3.297	2.143	0.712	2.307	-0.108	-0.829	1.848	0.618	0.479	0.253	0.532	-0.398	-0.216	-0.611	-0.181	-1.719	-0.791	-0.108	0.357	-1.486	-1.522	-0.082	-0.441	0.895	-1.908	-1.136	-1.035	-2.333
1.636	-1.349	0.12	-0.537	-0.206	-0.811	-1.215	1.682	0.486	1.932	-2	0.282	1.242	-0.655	-0.073	2.005	-2.573	-0.621	1.33	-2.647	0.994	2.917	-1.821	0.691	1.738	-0.161	-0.882	1.349	-0.051	0.788	-0.19	-0.784	-0.456	-0.817	0.472	-1.095	-0.896	1.774	-0.241	-1.804	0.174	-1.378	-0.213	0.681	-2.028	0.162	2.077	-0.004	-1.53	1.548
0.191	-1.495	1.968	-0.017	-0.266	-0.307	-0.181	1.687	-1.745	-0.046	-1.471	2.662	0.409	-1.444	1.193	0.086	-0.515	3.055	0.475	-2.256	3.236	-1.149	-1.769	2.632	0.262	-2.464	0.759	1.512	-1.367	1.121	-0.252	-0.309	0.472	0.22	-0.218	-1.071	-0.453	0.941	-1.883	-0.075	-1.158	-1.641	1.298	-0.137	-1.14	-0.406	0.675	-2.97	0.106	2.332
-0.126	-1.897	1.414	-0.384	-0.021	-0.208	0.318	1.924	-1.277	0.333	-2.383	1.705	-0.577	-1.333	1.059	-0.373	-3.077	2.225	1.096	-1.931	2.364	0.965	-2.869	0.966	-1.039	-0.679	1.803	-1.381	-1.846	0.476	0.127	-0.472	0.099	-0.898	0.435	-0.525	-0.243	1.388	-1.554	-1.532	0.986	0.25	-1.619	-0.178	-1.004	0.393	0.812	-2.236	0.787	2.384
-2.39	0.318	-0.779	-0.02	-0.014	0.017	2.447	-0.322	0.786	-3.089	0.324	-0.614	-1.593	0.28	-0.885	-3.238	1.124	0.173	-3.598	-0.602	-0.296	-3.637	0.594	-1.57	-1.245	1.373	-1.222	-1.391	-0.503	-1.693	-0.746	-0.054	0.236	0.715	0.029	-0.201	1.66	-0.305	0.954	0.789	1.03	-0.591	0.912	-0.692	-1.14	1.335	0.432	1.692	3.151	-0.317
-2.359	1.041	-0.231	-0.043	-0.157	0.007	2.41	-0.91	0.214	-2.723	1.54	-0.599	-1.897	0.492	0.117	-3.798	1.527	-0.271	-2.762	1.258	-1.661	-2.357	2.612	-0.442	-2.411	-0.468	0.333	-1.627	0.885	1.125	-0.512	0.256	-0.478	0.431	-0.552	0.501	1.89	-0.352	-0.037	0.179	-1.658	0.501	0.358	-0.142	1.522	1.854	-0.311	-1.177	2.834	-1.438
0.855	-1.384	1.781	-0.286	-0.34	0.031	-0.663	1.565	-1.73	1.587	-1.4	1.803	0.06	-1.366	1.699	2.018	-2.167	1.1	1.872	-1.56	2.826	1.961	-0.428	1.533	-0.342	-0.507	2.312	-0.484	-2.273	1.863	-0.536	-0.944	0.357	-0.04	0.272	-0.283	-0.957	0.91	-1.355	0.995	0.21	-0.8	0.101	1.037	0.492	-1.17	0.173	-2.203	-0.336	2.142
-0.862	1.448	2.009	-0.012	-0.013	0.002	0.959	-1.424	-2.014	-1.347	1.501	2.499	-0.341	1.339	1.429	-1.208	2.384	3.235	-1.315	0.643	3.24	-2.412	1.453	2.133	0.699	1.367	1.872	-0.515	2.083	0.621	-0.388	-0.026	0.643	0.384	-0.008	-0.649	0.63	-1.412	-1.255	1.33	0.48	-0.379	-0.075	0.63	-1.328	1.097	-2.146	-0.546	1.288	-1.363
-1.355	1.883	-0.407	-0.399	-0.188	0.111	1.53	-1.767	0.318	-0.907	2.431	-0.529	-1.804	1.224	-0.243	-1.502	3.312	-0.933	-0.204	2.189	-1.327	-0.261	2.722	0.351	-2.256	0.913	-1.163	-2.552	1.599	0.533	-1.08	0.011	0.401	0.265	-0.377	-0.186	0.862	-1.47	0.62	0.975	0.431	-0.23	0.075	-0.794	-1.145	1.272	-1.121	1.622	2.106	-1.994
1.015	-2.158	0.337	0.315	0.178	-0.78	-1.25	2.011	0.38	0.926	-2.905	0.234	1.081	-1.327	0.385	-0.186	-3.118	0.386	1.41	-3.491	1.026	1.24	-3.22	-0.772	2.173	-1.055	0.318	0.712	-0.918	1.382	0.465	-0.563	-0.805	0.124	0.884	-0.631	-0.922	1.268	0.418	-0.093	1.274	-1.677	1.077	1.379	-0.236	-1.724	0.552	0.386	-1.494	2.708
2.058	-0.772	1.302	-0.101	-0.103	0.148	-1.984	0.829	-1.394	2.493	-1.324	1.461	1.548	-0.221	1.082	3.4	-0.866	1.864	2.691	-1.99	0.611	1.92	-1.88	2.286	2.063	0.578	0.501	1.119	0.328	1.981	0.313	-0.693	0.406	-0.535	0.497	-0.1	-1.671	0.181	-1.046	0.256	1.051	-0.694	-0.862	1.069	0.763	-1.323	-0.474	-1.912	-2.208	1.447
-1.076	0.747	-1.992	0.199	0.429	0.207	0.96	-0.951	1.894	-1.184	0.43	-2.615	-0.906	1.043	-1.274	-1.517	1.124	-3.412	-2.057	-0.296	-2.59	-0.347	-0.131	-3.042	-1.828	1.238	-0.683	-0.38	2.063	-1.374	-0.048	0.115	-0.441	0.433	0.748	0.859	1.317	-0.217	1.684	-0.388	1.224	1.477	1.13	1.554	0.462	2.209	-0.56	1.062	0.587	-1.56
1.907	0.769	1.36	-0.252	-0.137	0.231	-1.787	-0.715	-1.517	2.606	0.849	1.27	1.122	0.652	1.38	2.932	1.355	0.315	3.14	-0.074	1.311	2.93	1.514	2.089	0.613	1.603	1.683	0.95	-0.099	2.232	0.417	0.226	0.095	-0.931	-0.516	0.36	-1.57	-1.196	-0.871	-1.705	0.252	0.661	-0.578	-1.185	1.253	-0.92	-2	-1.259	-1.967	-0.219
0.59	2.502	-0.643	0.008	0.026	0.019	-0.586	-2.48	0.604	0.537	2.996	-1.177	0.614	1.921	-0.106	-0.513	2.957	-1.507	1.256	2.814	-1.999	0.697	3.971	-0.737	0.27	2.209	0.893	1.587	1.588	0.084	-0.112	0.609	-0.502	0.124	-0.552	0.53	-0.689	-1.8	0.164	-0.096	-0.185	1.58	1.181	-0.83	0.541	-1.751	-1.566	0.214	-0.442	-3.051
1.748	0.521	-1.826	-0.294	-0.116	-0.23	-1.492	-0.443	1.994	2.061	1.067	-2.188	1.358	-0.02	-1.409	3.026	0.688	-2.66	2.218	1.898	-1.469	1.276	1.363	-2.924	2.029	-0.502	-0.645	1.098	-0.901	-2.089	0.063	0.415	-0.652	-0.615	-0.659	0.217	-1.216	0.027	1.425	0.219	-1.321	0.495	-1.37	-1.183	-0.324	-0.349	0.658	1.933	-1.723	-0.919
0.745	-1.457	-1.204	-0.801	-0.043	-0.242	0.005	1.49	1.393	0.659	-2.154	-1.075	0.773	-0.657	-1.33	0.481	-2.377	0.034	1.607	-2.722	-1.367	-0.167	-2.584	-1.486	0.794	-0.482	-2.396	1.685	-0.344	-0.851	-0.559	0.027	-0.957	-0.916	-0.119	0.51	0.081	0.668	1.437	-1.03	-1.182	0.791	-1.94	0.346	0.685	-0.188	0.279	2.471	-0.101	2.212
0.199	-2.238	-1.074	-0.278	-0.003	0.277	-0.011	2.229	0.92	0.716	-2.645	-1.443	-0.32	-1.726	-0.653	0.202	-3.335	-2.162	1.384	-3.217	-0.725	1.306	-2.045	-2.177	-0.598	-2.309	0.283	-1.283	-1.526	-1.211	0.204	-0.395	-0.201	-0.769	0.379	0.743	-0.129	1.629	1.43	-1.056	-0.215	1.637	-1.724	0.616	0.112	-0.798	2.007	2.22	0.085	2.727
0.467	1.151	-2.093	-0.368	-0.109	-0.249	-0.245	-1.084	2.259	0.847	1.743	-2	0.03	0.495	-2.119	1.426	1.868	-2.988	1.538	1.642	-1.141	0.274	2.677	-1.858	0.572	-0.421	-2.416	-0.8	0.733	-2.868	-0.79	-0.041	-0.887	0.044	-0.181	0.393	-0.675	-0.902	1.61	0.353	0.782	0.764	0.968	-0.76	0.121	-1.453	-0.211	1.925	0.19	-1.216
-1.373	1.63	-1.118	-0.575	-0.724	0.096	1.843	-0.978	1.078	-1.668	1.925	-1.708	-1.036	1.237	-0.485	-1.588	3.002	-1.655	-2.747	1.727	-1.589	-1.322	1.537	-2.734	-1.709	1.442	0.323	-0.01	1.592	-0.433	-0.941	-0.367	-0.461	-0.14	-0.961	0.66	1.341	-0.488	0.686	-0.016	-2.087	0.539	-0.579	-0.726	1.631	1.778	-0.375	-0.308	2.221	-1.47
-2.064	-0.082	0.96	-0.105	0.012	-0.287	2.094	0.088	-0.812	-2.152	0.437	1.463	-1.892	-0.643	0.406	-1.99	1.45	1.062	-1.544	0.393	2.318	-3.204	0.385	1.799	-2.48	-0.503	-0.509	-2.1	-1.64	0.725	-0.423	-0.675	-0.109	0.213	0.708	-0.477	1.542	0.509	-1.193	0.368	1.299	0.416	-0.515	1.18	-1.193	1.32	0.031	-2.169	2.525	-0.292
1.997	1.532	0.435	0.024	0.005	-0.107	-2.017	-1.563	-0.378	2.595	1.831	0.174	1.334	1.158	0.659	2.414	2.202	-0.871	3.472	1.14	0.195	2.769	2.746	0.8	0.533	1.872	0.854	1.554	0.601	1.629	0.736	0.151	-0.369	-0.683	-0.154	0.154	-1.249	-1.393	-0.558	-1.299	0.735	0.035	-0.63	-0.287	1.277	-1.188	-1.242	-1.645	-2.725	-1.661
0.456	-2.073	-0.121	-0.423	0.33	-0.872	-0.014	1.857	0.834	0.36	-2.787	-0.255	0.496	-1.252	0.005	0.335	-3.158	-1.374	-0.619	-3.086	0.135	1.173	-3.356	0.294	1.38	-1.013	-0.629	0.683	-1.017	1.055	-0.586	-0.375	-0.653	-0.155	1.022	-0.99	0.468	1.745	0.161	-1.022	1.62	-1.38	0.54	0.99	-1.802	1.314	1.163	0.615	-0.493	1.92
0.567	-1.898	1.441	-0.41	-0.145	-0.241	-0.312	1.983	-1.301	0.884	-1.914	2.124	0.216	-1.787	0.687	1.86	-1.395	2.107	1.154	-3.004	2.348	0.204	-1.577	2.934	-0.79	-2.284	0.733	0.832	-2.364	-0.087	0.108	-0.313	0.306	-0.929	0.019	-0.791	-0.982	1.527	-1.201	-1.956	-0.361	-0.497	-0.607	-0.545	-1.65	-1.659	1.722	-2.08	0.334	2.323
-0.82	-2.058	0.906	-0.069	-0.048	-0.25	0.876	2.063	-0.793	-1.179	-2.045	1.555	-0.403	-1.999	0.187	-1.452	-3.041	1.729	-2.093	-1.379	1.619	-0.572	-1.848	2.483	-1.063	-2.138	-0.724	0.385	-2.73	0.257	0.371	-0.662	-0.098	-0.506	0.558	-0.403	0.257	1.669	-1.19	-0.958	0.852	0.494	-1.308	0.261	-1.159	0.652	1.297	-2.154	1.431	2.37
-2.311	0.735	-0.681	0.042	0.252	0.216	2.271	-0.983	0.536	-3.04	0.758	-0.506	-1.491	0.675	-0.801	-3.236	1.732	0.019	-3.373	-0.084	0.093	-3.635	0.762	-1.42	-1.101	1.65	-1.095	-1.298	0.057	-1.663	-0.729	0.267	0.421	0.807	0.206	0.001	1.515	-0.893	0.728	1.286	1.2	0.145	0.922	-0.021	-1.091	1.361	-0.543	1.779	2.939	-1.027
-2.234	0.778	-1.09	-0.076	-0.092	0.119	2.283	-0.73	1.001	-2.434	1.176	-1.67	-1.932	0.344	-0.469	-3.482	1.604	-1.564	-2.503	0.499	-2.574	-1.792	2.059	-1.841	-2.384	-0.632	-0.403	-2.224	0.788	0.456	-0.435	0.315	-0.437	0.289	-0.502	0.665	1.795	-0.49	0.409	-0.149	-1.508	0.598	0.027	-0.213	1.738	1.998	-1.225	-0.413	2.652	-0.949
1.069	-0.844	1.961	-0.415	-0.145	0.257	-0.802	0.911	-2.075	1.784	-0.877	1.788	0.256	-0.81	2.083	2.06	-1.661	1.082	2.356	-0.989	2.666	2.091	0.093	1.244	0.034	0.046	2.798	-0.018	-1.733	2.615	-0.646	-0.664	0.767	-0.186	0.373	-0.244	-1.036	0.352	-1.491	0.799	0.229	-0.564	-0.148	1.374	0.272	-1.169	-0.581	-1.958	-0.523	1.431
-0.568	0.949	2.35	-0.01	-0.105	0.07	0.56	-0.846	-2.397	-0.991	0.969	2.916	-0.123	0.879	1.685	-0.467	1.048	3.864	-1.646	0.064	2.945	-1.788	1.754	2.848	0.912	0.523	2.005	-0.113	1.943	1.261	-0.567	-0.087	0.606	0.523	-0.114	-0.478	0.043	-0.816	-1.777	1.476	-0.525	-0.062	0.815	0.963	-0.635	-0.189	-1.874	-1.575	1.07	-0.829
0.465	1.981	0.625	-1.052	0.178	0.017	0.407	-2.012	-0.61	1.053	1.962	0.976	-0.206	1.953	0.28	1.818	2.584	0.57	1.446	0.892	0.93	0.894	2.107	2.062	-0.121	1.975	-0.918	-0.731	2.895	0.426	-1.1	0.775	0.492	-0.866	-0.378	-0.448	0.345	-1.303	-0.224	-0.932	-0.105	-1.505	-1.715	-1.1	-0.366	1.281	-0.738	-0.537	0.394	-2.639
1.207	-2.14	-0.301	-0.186	0.003	-0.537	-1.099	2.117	0.8	1.288	-2.814	-0.65	1.049	-1.4	0.044	0.351	-3.329	-0.671	2.05	-3.379	-0.116	1.71	-2.518	-1.635	1.887	-0.74	-0.147	0.95	-1.516	1.132	-0.182	-0.738	-0.497	-0.179	0.745	-0.469	-1.121	1.281	0.685	-0.454	1.072	-1.447	0.889	1.138	-0.257	-2.128	0.929	0.333	-1.046	2.874
2.045	-0.479	1.501	0.049	0.046	-0.041	-2.079	0.462	-1.509	2.549	-0.174	1.866	1.469	-0.734	1.073	2.971	-1.034	2.449	2.234	0.754	2.486	3.27	0.175	1.177	0.788	-1.32	1.764	1.82	-1.558	0.381	0.653	0.37	0.272	-0.57	-0.29	-0.382	-1.283	0.698	-1.322	-1.156	-0.71	0.502	-0.076	-1.063	-0.954	-1.313	1.673	-0.871	-2.783	0.204
-0.092	-0.687	-2.399	0.079	0.388	0.016	0.075	0.435	2.391	-0.11	-1.29	-2.763	-0.07	-0.076	-1.927	0.064	-0.918	-3.831	-1.091	-1.805	-2.649	0.707	-1.978	-2.423	-1.006	0.552	-2.087	0.803	0.629	-2.284	0.158	-0.246	-0.376	0.016	1.029	0.407	0.496	0.91	1.904	-1.009	1.259	0.476	0.545	1.853	-0.111	1.558	0.625	1.949	-0.336	-0.001
1.896	0.016	1.512	-0.337	-0.197	0.255	-1.701	0.008	-1.649	2.53	0.369	1.473	1.181	-0.351	1.505	2.302	1.407	1.254	3.219	-0.012	0.631	3.049	0.324	2.481	0.55	-0.029	2.381	1.34	-1.451	1.364	0.406	-0.021	0.23	-1.089	-0.413	0.259	-1.643	-0.649	-1.148	-1.571	0.351	0.866	-1.028	-1.325	0.904	-1.075	-1.324	-1.761	-1.728	0.624
1.537	2.117	-0.166	-0.166	0.115	0.019	-1.419	-2.204	0.102	1.719	2.67	-0.545	1.271	1.48	0.187	0.85	3.311	-0.844	2.377	2.443	-1.442	2.308	3.408	0.14	1.04	1.699	1.226	2.107	0.723	0.387	0.07	0.678	-0.424	-0.391	-0.461	0.451	-1.201	-1.507	-0.302	-0.907	-0.148	1.379	0.534	-1.02	0.712	-2.179	-1.03	-0.438	-1.58	-2.798
1.861	-0.034	-1.549	0.242	0.609	0.496	-2.067	-0.515	1.121	2.334	0.245	-2.04	1.33	-0.257	-0.96	2.592	-0.652	-2.658	3.211	0.686	-1.69	1.784	0.911	-2.776	1.854	-0.985	-0.25	0.539	-0.788	-1.55	0.665	0.815	-0.112	-0.218	0.301	1.02	-1.504	-0.372	0.54	-0.495	1.171	1.697	0.382	-0.445	1.729	-1.898	0.398	-0.133	-2.535	-0.627
0.67	-1.872	0.336	-0.208	-0.03	-0.882	-0.457	1.897	0.432	0.26	-2.453	0.444	1.09	-1.217	0.157	-0.467	-2.043	1.218	0.779	-3.306	0.862	-0.386	-2.693	-0.531	2.075	-1.601	-0.16	1.221	-0.61	1.122	0.511	-0.332	-0.914	-0.884	0.28	-0.704	-0.987	1.294	0.436	-1.633	-0.494	-0.564	-1.317	0.827	-1.598	-2.014	1.667	0.5	0.041	2.418
0.529	-1.984	-1.367	0.302	0.063	0.288	-0.672	1.966	1.189	0.315	-2.249	-2.017	0.749	-1.631	-0.67	0.61	-3.331	-2.017	0.664	-1.663	-2.871	-0.783	-2.07	-2.094	1.77	-1.694	-0.575	0.322	-2.195	0.157	0.168	-0.198	-0.432	0.438	0.336	1.015	0.141	1.836	1.183	1.464	0.147	1.241	-0.229	-0.223	1.677	0.492	2.207	2.129	-1.419	2.022
-1.162	1.389	-1.599	0.225	0.16	-0.175	0.99	-1.478	1.676	-1.783	1.076	-1.885	-0.462	1.66	-1.275	-2.399	1.924	-2.162	-2.291	0.484	-1.116	-1.473	0.396	-2.71	-0.625	2.421	-0.417	0.032	2.232	-2.065	0.455	0.586	-0.76	-0.009	-0.266	0.409	1.13	-1.109	0.941	-0.849	-0.931	0.036	-0.346	0.461	1.195	1.453	-1.888	0.259	0.789	-1.774
-1.983	0.949	-0.911	-0.157	-0.851	-0.105	2.144	-0.201	0.978	-2.524	1.026	-1.409	-1.367	0.81	-0.379	-2.917	2.069	-1.448	-3.35	0.312	-1.224	-2.133	0.74	-2.414	-1.839	0.724	0.59	-0.58	1.635	-0.467	-0.687	-0.56	-0.586	0.411	-1.019	0.391	1.646	-0.14	0.348	0.788	-2.03	0.205	-0.02	-1.027	1.443	2.216	-0.233	-0.583	2.543	-0.31
-1.497	-0.436	1.774	-0.11	-0.144	-0.159	1.523	0.511	-1.712	-1.542	0.053	2.324	-1.37	-0.928	1.143	-1.458	1.034	1.907	-0.699	-0.239	3.032	-2.529	-0.046	2.771	-2.335	-0.891	0.555	-1.442	-1.987	1.553	-0.087	-0.748	0.303	-0.156	0.446	-0.639	0.72	0.467	-1.852	0.022	1.305	0.029	-1.242	0.526	-0.996	0.419	-0.512	-2.404	2.225	0.541
0.542	2.414	-0.592	0.166	-0.017	0.178	-0.673	-2.379	0.472	0.772	2.785	-1.153	0.298	1.93	0.007	0.455	2.512	-2.129	1.885	2.68	-1.25	0.57	3.895	-0.992	-0.791	2.065	0.032	0.764	2.257	0.933	0.556	0.46	-0.267	-0.234	-0.477	0.619	-0.165	-1.923	0.036	-1.31	-0.169	0.668	0.253	-0.502	1.602	-0.508	-2.022	-1.032	-1.15	-2.729
0.715	-2.022	-0.354	-0.649	0.26	-0.725	-0.131	1.887	0.959	0.657	-2.72	-0.353	0.7	-1.236	-0.346	-0.075	-3.13	-1.117	0.346	-3.099	0.6	1.562	-3.276	-0.689	1.362	-0.884	-1.151	1.254	-0.749	0.491	-0.653	-0.486	-0.507	-0.543	1.012	-0.854	0.2	1.845	0.221	-1.554	1.397	-1.127	0.193	1.09	-1.726	1.143	1.29	0.443	-0.473	1.894
-0.661	-1.31	1.841	-0.042	-0.25	-0.388	0.706	1.482	-1.632	-0.781	-1.112	2.507	-0.505	-1.449	1.075	0.01	-0.667	3.199	-0.966	-2.049	3.077	-1.709	-0.535	2.562	-1.416	-1.941	0.684	0.353	-2.068	0.872	-0.298	-0.149	0.307	0.215	-0.337	-1.091	0.284	0.883	-1.964	-0.49	-1.096	-1.589	1.151	-0.867	-1.06	0.694	0.654	-2.977	1.098	1.98
-0.373	-1.973	1.184	-0.072	-0.148	-0.281	0.4	2.064	-1.009	-0.67	-1.916	1.864	-0.024	-1.945	0.433	-1.189	-2.866	1.941	-1.375	-1.084	1.99	0.135	-1.886	2.693	-0.819	-2.245	-0.311	0.764	-2.784	0.464	0.489	-0.594	-0.032	-0.639	0.284	-0.533	-0.136	1.545	-1.34	-1.353	0.612	0.269	-1.25	-0.253	-1.284	0.355	1.132	-2.268	0.868	2.491
-2.328	0.429	-0.374	-0.061	-0.081	0.922	2.357	-0.413	-0.391	-2.992	0.666	-0.252	-1.587	0.132	-0.424	-3.01	1.415	0.57	-3.769	-0.144	-0.015	-3.152	1.226	-1.199	-1.103	1.054	-0.864	-1.527	-0.68	-1.208	-0.792	-0.269	0.856	0.68	0.09	0.852	1.526	-0.527	-0.319	1.246	-0.178	1.814	0.642	1.207	0.708	1.467	-1.653	-0.313	3.086	-0.255
-2.577	0.303	0.06	0.004	0.104	0.128	2.599	-0.372	-0.133	-3.121	0.508	-0.361	-1.927	0.115	0.468	-4.012	0.222	0.219	-3.146	-0.108	-1.333	-3.149	1.564	-0.462	-1.833	-1.016	0.602	-2.008	0.642	1.443	-0.596	0.411	-0.206	0.604	-0.205	0.468	1.902	-0.018	-0.312	0.548	-1.323	0.522	0.653	0.176	1.486	1.611	-0.266	-1.329	3.206	-0.728
1.728	-1.502	0.732	-0.18	-0.384	-0.066	-1.614	1.73	-0.702	2.388	-1.156	0.721	0.969	-1.835	0.665	2.967	-1.137	-0.222	3.094	-1.672	1.465	2.222	-0.165	1.102	0.476	-1.76	1.697	1.069	-2.935	0.528	-0.057	-1.117	-0.228	-0.31	0.35	0.092	-1.472	0.941	-0.8	0.618	0.879	-0.155	-0.604	0.507	1.129	-1.246	0.778	-1.985	-1.677	2.439
-0.491	1.259	2.243	-0.094	0.06	-0.096	0.543	-1.329	-2.191	-0.992	1.551	2.646	0.013	0.908	1.727	-1.737	0.741	2.988	-1.451	2.488	2.293	-0.516	2.002	3.567	0.464	0.099	2.325	0.759	1.657	1.403	-0.618	0.342	0.398	0.435	-0.245	-0.585	-0.055	-1.051	-1.754	1.105	-0.915	-0.002	1.006	0.627	-0.962	-0.451	-1.974	-1.381	1.115	-1.538
0.267	2.279	0.282	-0.332	0.023	-0.881	0.054	-2.236	0.476	-0.017	2.892	0.463	0.511	1.582	0.048	0.663	3.289	1.251	-1.033	2.734	0.86	-0.056	3.583	-0.399	0.883	0.998	0.926	1.368	1.792	-0.615	-0.517	0.781	-0.799	-0.088	-0.724	-0.847	-0.07	-1.434	0.525	0.845	-0.75	-1.475	-0.878	-1.314	-1.364	0.678	-1.245	1.25	0.184	-2.924
1.172	-2.023	0.53	-0.294	-0.256	-0.807	-0.872	2.225	0.155	1.259	-2.736	0.592	1.034	-1.245	0.391	0.299	-3.32	0.844	1.902	-2.801	1.508	1.695	-3.259	-0.259	1.926	-0.704	0.063	0.647	-0.822	1.396	-0.163	-1.008	-0.58	-0.371	0.52	-0.909	-0.619	1.482	0.272	-1.203	0.635	-1.581	0.473	0.953	-1.498	-1.338	0.946	0.956	-1.096	2.866
0.535	-1.624	2.058	-0.002	-0.051	-0.015	-0.554	1.63	-2.07	1.024	-1.915	2.443	0.021	-1.277	1.574	0.723	-2.235	3.452	1.858	-1.22	2.627	1.462	-2.821	1.884	-0.322	-0.423	2.135	-0.749	-2.079	1.373	0.542	-0.507	0.303	-0.536	0.397	-0.344	-0.13	1.036	-1.695	-0.755	1.217	0.337	-1.495	-0.207	-0.45	0.87	1.42	-1.588	-0.976	2.153
-0.572	-0.677	-2.319	0.132	0.374	-0.029	0.483	0.457	2.33	-0.573	-1.276	-2.722	-0.539	-0.05	-1.795	-0.975	-1.15	-3.728	-1.273	-2.019	-2.239	0.499	-1.643	-2.902	-1.586	0.418	-1.767	0.11	0.687	-2.387	0.036	-0.268	-0.46	0.225	1.012	0.39	0.904	0.863	1.759	-0.683	1.616	0.617	0.921	1.711	-0.217	1.832	0.295	1.598	0.052	0.094
1.767	-1.249	1.128	-0.333	-0.133	0.078	-1.556	1.33	-1.16	2.493	-1.335	1.108	0.982	-1.088	1.097	3.127	-0.46	1.24	2.665	-1.819	0.122	2.64	-2.053	1.95	0.636	-0.771	2.115	0.472	-2.044	0.826	0.409	-0.099	0.078	-1.077	-0.179	0.064	-1.764	0.55	-1.031	-1.527	0.11	1.088	-1.325	-1.215	-0.033	-1.447	0.021	-2.036	-1.336	2.022
2.25	1.303	0.557	0.046	0.039	-0.187	-2.269	-1.288	-0.495	2.555	1.936	0.75	1.859	0.645	0.306	1.924	2.362	1.57	2.75	2.593	-0.12	3.435	1.768	1.333	1.827	-0.044	1.222	2.328	0.126	-0.522	0.388	0.723	-0.104	-0.306	-0.634	-0.271	-1.849	-0.576	-0.617	-0.239	-1.185	0.668	0.253	-1.337	-1.004	-2.28	0.132	0.145	-2.58	-1.956
1.747	-0.16	-1.608	0.44	-0.184	0.675	-2.123	0.331	1.01	2.358	0.084	-1.911	1.086	-0.401	-1.197	2.404	-0.366	-2.946	3.277	-0.163	-1.341	2.408	1.204	-2.011	1.071	-1.511	-1.278	0.164	-0.002	-1.755	1.034	0.056	0.252	-0.22	-0.387	0.998	-1.416	0.58	0.7	-0.132	-0.485	2.171	-0.423	-1.377	0.617	-1.237	1.58	1.211	-2.715	0.052
0.658	-1.774	-0.312	0.354	0.533	-0.889	-0.958	1.305	0.992	0.239	-2.303	-0.588	1.094	-1.142	-0.077	0.296	-3.071	0.182	0.511	-2.847	-1.592	-0.776	-1.915	-0.598	2.177	-1.414	-0.05	0.875	-0.865	0.98	1.035	0.214	-0.743	-0.365	0.777	-0.939	-1.236	0.805	0.391	-0.918	0.125	-1.585	-0.329	1.787	-1.352	-2.249	1.183	0.092	-0.657	1.771
0.425	-2.27	-0.874	0.372	0.09	0.333	-0.649	2.211	0.672	0.359	-2.598	-1.524	0.492	-1.831	-0.19	0.649	-3.7	-1.42	0.97	-2.144	-2.322	-0.69	-2.652	-1.752	1.486	-2.045	0.218	-0.304	-2.141	0.499	0.234	-0.334	-0.31	0.51	0.518	0.979	0.127	2.043	0.836	1.592	0.517	1.211	-0.03	-0.03	1.785	0.369	2.7	1.747	-1.367	2.274
-0.785	1.826	-1.317	0.325	0.21	-0.062	0.608	-1.913	1.362	-1.284	1.664	-1.798	-0.194	1.932	-0.781	-1.758	2.542	-2.19	-2.127	1.107	-1.332	-0.907	1.071	-2.699	-0.651	2.257	0.183	0.42	2.815	-1.199	0.639	0.677	-0.542	0.005	-0.256	0.411	0.841	-1.432	0.768	-1.019	-0.595	0.114	-0.168	0.332	1.299	0.727	-2.199	-0.079	0.352	-2.28
-1.43	0.738	-1.718	-0.557	0.1	0.737	1.859	-0.774	1.069	-1.995	0.775	-2.171	-0.864	0.686	-1.145	-1.509	1.139	-3.095	-2.871	1.295	-1.796	-2.303	-0.278	-2.398	-0.368	1.661	-1.071	-0.107	0.064	-1.66	-1.167	0.097	0.244	0.121	0.099	1.113	1.289	-0.629	0.515	-0.125	-0.349	2.088	0.457	1.154	1.321	0.839	-1.598	0.221	2.328	-0.865
-1.613	-0.138	1.605	-0.17	0.505	-0.207	1.68	-0.18	-1.449	-1.451	-0.619	2.101	-1.751	0.349	1.006	-0.358	-0.514	2.361	-1.705	-1.658	1.766	-1.943	-0.348	3.05	-1.513	1.41	1.242	-2.821	0.352	0.824	-0.858	0.171	-0.267	0.517	0.839	-0.14	1.348	0.572	-1.415	1.033	0.441	0.81	0.329	1.887	-0.061	0.687	0.643	-2.3	1.938	-0.863
0.57	2.505	-0.161	0.05	-0.041	-0.094	-0.629	-2.499	0.217	0.924	3.021	-0.527	0.192	1.857	0.177	0.309	3.508	-1.378	1.969	2.73	-0.815	1.005	3.803	0.237	-0.869	2.195	0.253	0.706	1.876	1.227	0.327	0.49	-0.512	-0.238	-0.562	0.327	-0.349	-1.939	-0.286	-1.285	-0.416	0.456	0.294	-0.603	1.317	-0.908	-1.849	-1.271	-0.886	-2.953
1.123	-1.842	-0.054	-0.511	0.133	-0.897	-0.619	1.862	0.718	1.103	-2.507	0.143	1.072	-1.097	-0.293	0.989	-3.191	-0.689	0.297	-2.751	0.953	2.017	-2.898	0.633	1.67	-0.901	-1.129	1.48	-0.425	0.476	-0.399	-0.554	-0.631	-0.522	0.867	-1.073	-0.221	1.972	-0.015	-1.542	1.036	-1.506	0.151	0.997	-1.904	0.858	1.902	0.323	-1.007	1.711
0.161	-0.644	2.363	-0.401	0.229	-0.035	0.084	0.434	-2.374	0.672	-0.701	2.898	-0.349	-0.572	1.712	1.362	-1.519	2.756	0.103	-0.799	3.853	1.281	0.263	2.911	-1.1	0.171	2.139	-0.846	-1.525	1.537	0.164	0.094	0.493	-0.969	0.344	-0.579	-0.461	0.841	-1.928	-1.531	1.18	-0.133	-1.607	-0.543	-0.606	-1.374	0.975	-2.606	0.568	0.023
-0.921	-2.041	-0.256	0.03	0.156	-0.494	0.911	1.988	0.544	-1.429	-2.17	0.269	-0.322	-1.795	-0.809	-1.932	-3.162	-0.003	-2.235	-1.37	0.359	-1.031	-2.5	1.221	-0.766	-1.773	-1.773	0.275	-2.779	-0.737	0.455	-0.458	-0.597	-0.394	0.768	-0.401	0.456	1.992	-0.122	-1.148	0.701	0.474	-0.954	0.947	-1.292	1.076	2.138	-1.025	1.285	1.921
-2.072	1.041	-0.358	0.314	0.049	-0.803	1.778	-1.089	1.091	-2.584	1.435	-0.704	-1.451	0.607	-0.039	-3.344	0.863	-1.354	-2.071	2.228	-1.256	-3.23	1.978	0.033	-1.785	-0.44	0.186	-1.225	1.063	0.934	-0.164	0.628	-0.894	0.734	-0.536	-0.58	1.183	-0.579	0.929	1.679	-0.359	-1.143	0.404	-1.506	-0.863	1.498	0.37	1.392	2.306	-1.558
-2.422	-0.53	-0.635	0.016	-0.007	-0.239	2.423	0.555	0.846	-3.024	-0.287	-0.969	-1.713	-0.72	-0.287	-3.632	-1.196	-0.985	-2.905	-0.003	-2.031	-3.64	0.572	-0.485	-1.343	-1.717	-0.635	-1.869	-0.925	0.789	-0.627	0.277	-0.555	0.68	-0.282	0.096	1.693	0.78	0.541	1.07	-1.126	-0.611	0.461	-0.724	1.137	2.028	1.28	-0.449	3.033	0.283
1.436	-1.787	0.576	-0.402	-0.206	0.338	-1.049	2.077	-0.723	1.463	-2.435	0.238	1.319	-1.053	0.948	0.786	-3.333	0.581	2.51	-2.796	0.286	1.323	-2.341	-0.903	1.921	-0.339	0.508	1.712	-1.152	2.014	-0.135	-0.521	0.959	-0.597	0.194	-0.266	-0.743	1.696	-0.071	-1.553	-0.356	-0.64	0.186	-0.059	-1.058	-1.55	1.823	0.657	-1.312	2.361
-0.782	1.428	2.077	-0.022	0.063	-0.09	0.796	-1.437	-2.032	-1.335	1.598	2.493	-0.219	1.203	1.566	-1.733	0.652	2.956	-2.154	2.057	1.886	-0.985	2.335	3.307	0.55	0.66	2.148	0.305	2.089	1.217	-0.593	0.314	0.319	0.552	-0.186	-0.511	0.18	-1.056	-1.692	1.231	-0.789	0.145	1.104	0.733	-0.793	-0.569	-1.841	-1.343	1.396	-1.736
-0.261	2.385	0.171	-0.007	-0.058	-0.826	0.255	-2.313	0.569	-0.568	3.027	0.043	0.05	1.631	0.269	-0.117	3.888	0.527	-1.647	3.096	0.218	-0.457	3.305	-1.02	-0.295	1.24	1.217	1.186	1.734	0.273	-0.375	0.637	-0.861	0.351	-0.736	-0.686	-0.02	-1.535	0.589	1.409	-0.55	-0.411	0.361	-1.352	-1.596	0.29	-0.941	1.388	0.531	-2.983
1.013	-2.137	0.246	-0.357	-0.133	-0.757	-0.76	2.228	0.468	1.301	-2.751	0.057	0.643	-1.443	0.404	0.647	-3.628	0.149	2.187	-3.04	0.62	1.597	-2.787	-1.011	1.472	-0.729	0.459	0.124	-1.438	1.381	-0.272	-0.928	-0.655	-0.419	0.675	-0.724	-0.765	1.4	0.534	-1.211	0.923	-1.526	0.611	1.014	-1.053	-1.848	1.181	0.875	-0.732	2.951
-0.606	-2.004	1.563	-0.047	-0.038	-0.035	0.623	2.036	-1.564	-0.659	-2.71	1.605	-0.53	-1.22	1.432	-0.874	-2.985	2.643	0.299	-3.248	1.44	-1.511	-3.184	0.972	0.256	-0.815	2.133	-1.47	-0.727	1.677	-0.11	-0.8	0.001	0.019	0.732	-0.092	0.662	1.235	-1.405	0.606	0.938	0.864	-0.963	1.218	0.098	1.753	1.001	-1.426	0.546	2.75
-0.936	-2.147	-0.691	-0.313	0.33	0.002	1.155	1.918	0.688	-0.694	-2.817	-0.718	-1.131	-1.395	-0.612	-1.39	-3.287	-1.39	-0.768	-3.312	0.278	0.33	-2.924	-1.147	-2.158	-1.209	-0.182	-1.246	-0.98	-1.655	-0.163	-0.41	0.128	-0.446	1.06	-0.136	0.872	1.899	-0.036	-1.262	1.571	0.374	-0.715	1.078	-1.217	1.715	1.476	-0.617	1.345	1.901
1.898	-1.569	-0.081	-0.287	-0.196	-0.227	-1.68	1.697	0.209	2.646	-1.511	-0.189	1.08	-1.577	0.022	3.103	-0.732	0.499	2.821	-1.102	-1.169	3.023	-2.499	-0.087	0.759	-1.837	1.098	0.628	-2.276	-0.682	0.49	-0.18	-0.206	-1.05	-0.199	-0.244	-1.788	1.113	-0.346	-1.475	-0.808	0.602	-1.372	-0.838	-1.104	-1.6	1.452	-1.329	-1.532	2.192
2.409	0.763	0.501	0.03	-0.089	0.012	-2.449	-0.705	-0.495	2.702	1.402	0.58	2.002	0.095	0.42	2.469	1.887	1.558	2.525	2.069	-0.267	3.825	1.269	0.512	2.251	-0.646	1.25	2.334	-0.425	-0.51	0.505	0.461	0.257	-0.435	-0.639	-0.23	-1.9	-0.131	-0.359	-0.441	-1.529	0.431	-0.131	-1.048	-1.251	-2.067	0.266	0.692	-2.902	-1.262
1.339	-0.726	-1.769	0.632	0.181	0.611	-1.934	0.667	1.198	1.923	-0.82	-2.178	0.727	-0.568	-1.292	1.651	-1.688	-2.838	2.822	-1.122	-1.571	2.267	0.098	-2.741	0.477	-1.589	-0.813	-0.191	-0.101	-1.699	1.146	0.218	0.017	0.014	0.148	1.11	-1.32	0.762	0.7	0.372	0.588	1.97	-0.141	-0.919	1.355	-1.156	1.8	0.585	-2.449	0.564
1.136	-1.646	-0.707	0.044	0.572	-0.725	-1.152	1.148	1.351	0.909	-2.196	-1.17	1.329	-0.995	-0.237	1.473	-1.889	-2.052	-0.161	-2.258	-1.363	1.359	-3.151	-0.814	2.455	-0.97	-0.165	0.957	-1.144	0.782	0.841	0.394	-0.73	-0.738	0.661	-0.613	-1.292	0.551	0.813	-1.322	-0.084	-1.194	-1.017	1.656	-1.092	-2.415	0.415	0.641	-0.978	1.729
0.932	-2.172	-0.498	0.136	0.088	0.455	-0.999	2.148	0.241	1.155	-2.518	-1.098	0.685	-1.714	0.145	1.51	-3.512	-0.867	1.886	-1.974	-1.755	0.328	-2.635	-1.84	1.496	-1.98	0.904	-0.286	-2.086	0.546	0.581	-0.232	-0.064	-0.302	0.417	0.981	-0.651	1.881	0.898	0.128	0.102	1.969	-1.273	-0.12	0.93	-1.455	2.153	1.679	-1.298	2.327
-1.598	1.391	-1.07	0.28	0.313	-0.223	1.452	-1.566	1.185	-2.264	1.046	-1.092	-0.819	1.71	-1.052	-3.04	1.855	-1.032	-2.319	0.322	-0.273	-2.339	0.392	-1.974	-0.942	2.27	-0.107	-0.708	2.422	-1.908	0.335	0.775	-0.838	0.242	-0.16	0.389	1.416	-1.055	0.573	-0.66	-0.814	0.322	0.1	0.411	1.315	1.449	-1.775	-0.338	1.417	-1.981
-0.114	0.212	-2.354	0.345	0.815	0.195	-0.179	-0.932	2.152	-0.312	0.513	-2.977	0.1	-0.054	-1.628	-0.278	-0.236	-3.801	0.321	1.332	-3.257	-1.355	0.856	-2.828	1.178	-0.438	-1.744	-0.61	-0.883	-1.375	0.144	0.965	-0.515	0.504	0.53	0.864	-0.189	-0.794	1.346	0.365	1.306	1.689	1.608	0.385	0.898	-1.268	-0.887	1.066	-0.14	-0.985
-2.285	-0.464	0.35	-0.24	0.333	-0.501	2.449	0.166	-0.065	-2.332	-1.043	0.802	-2.16	0.126	-0.188	-1.544	-1.042	1.565	-2.496	-1.955	0.282	-3.238	-0.768	1.406	-1.964	1.091	0.335	-3.114	0.234	-0.795	-0.822	0.123	-0.975	0.35	0.499	-0.029	1.804	0.044	-0.56	0.149	0.16	1.024	0.43	1.616	0.172	1.829	-1.089	-0.767	2.981	0.315
1.41	1.878	1.066	0.072	-0.039	-0.043	-1.479	-1.82	-1.061	1.771	2.499	0.98	0.986	1.194	1.072	1.139	3.316	0.702	2.657	2.461	0.291	2.238	2.661	1.958	0.131	1.264	1.73	1.634	0.453	1.6	0.426	0.616	-0.214	-0.296	-0.679	0.124	-0.983	-1.203	-1.163	-1.035	-0.608	0.97	0.429	-1.46	0.422	-1.607	-0.342	-1.564	-1.904	-2.372
1.188	-1.61	-0.76	-0.14	0.551	-0.729	-1.03	1.244	1.422	1.174	-2.183	-1.183	1.125	-0.94	-0.33	1.701	-1.935	-2.157	0.216	-2.686	-1.328	1.834	-2.937	-0.676	2.044	-0.362	-0.425	1.075	-1.281	0.693	-0.1	-0.186	-0.893	-0.121	1.252	-0.449	-0.325	1.456	1.129	-1.051	1.77	-0.948	0.831	1.812	-0.758	0.4	0.783	1.703	-1.693	1.04
-0.654	0.75	2.167	-0.161	0.273	-0.277	0.763	-0.928	-2.009	-0.41	0.556	2.802	-0.868	0.904	1.438	-0.473	-0.506	3.043	-1.116	1.186	3.446	0.643	0.871	2.948	-0.754	1.999	1.215	-1.928	0.666	1.302	-0.053	0.045	0.433	-0.26	0.504	-0.989	0.725	-0.138	-1.995	-0.195	1.648	-1.09	-1.254	0.288	-1.238	0.509	0.275	-2.985	0.744	-1.647
-0.363	-0.84	-2.108	-0.112	0.37	-0.13	0.426	0.623	2.178	-0.497	-1.574	-2.112	-0.189	-0.02	-2.027	-0.868	-2.047	-3.07	-1.193	-1.881	-1.331	0.438	-2.052	-1.843	-1.175	0.57	-2.295	0.498	0.186	-2.895	0.394	0.445	-0.695	-0.624	0.293	0.428	-0.193	0.986	1.793	-0.9	-0.722	0.599	-1.532	0.902	0.172	0.013	2.074	1.587	0.988	0.239
-1.895	1.346	0.46	-0.273	-0.332	-0.75	2.088	-1.043	0.161	-2.313	1.922	0.377	-1.426	0.719	0.461	-3.203	1.609	-0.234	-1.854	2.845	-0.017	-2.623	2.12	1.417	-1.84	-0.147	1.002	-0.556	0.908	1.102	-0.796	0.248	-0.812	0.28	-0.862	-0.576	1.501	-0.514	0.223	0.614	-1.194	-1.561	-0.16	-1.708	0.027	1.993	0.374	-0.165	2.568	-1.558
-2.508	0.652	-0.07	-0.018	0.083	0.031	2.543	-0.677	0.075	-3.075	1	0.306	-1.832	0.306	-0.4	-3.91	0.644	-0.327	-2.886	2.052	0.076	-3.298	0.677	1.385	-1.716	0.648	-1.539	-2.031	-0.774	-0.482	-0.586	0.551	0.311	0.563	-0.384	-0.254	1.951	-0.258	0.41	0.717	-0.316	-1.315	0.101	-1.35	-0.119	2.171	0.861	0.443	3.026	-1.069
0.307	-1.599	1.264	1.032	0.4	0.051	-1.079	1.181	-1.365	-0.166	-1.535	1.82	0.865	-1.599	0.645	0.195	-0.889	2.698	-0.503	-2.527	2.296	-1.11	-1.113	1.377	0.324	-2.006	-0.271	1.622	-2.219	0.96	1.487	-0.232	0.187	0.474	0.941	-0.117	-0.573	0.56	-1.19	1.147	1.708	-0.529	-0.03	1.363	0.798	-0.142	0.17	-2.154	-1.494	1.78
0.073	2.063	1.561	-0.123	-0.104	0.04	0.019	-1.998	-1.647	-0.289	2.53	1.933	0.412	1.49	1.113	0.401	2.955	2.7	-1.153	2.143	2.561	-0.772	3.402	1.398	1.22	1.005	1.711	0.934	2.062	0.336	-0.493	0.441	0.362	0.252	-0.644	-0.301	-0.473	-1.466	-1.345	0.62	-1.325	0.481	1.152	-0.199	-0.771	-1.341	-2.036	-0.811	0.52	-2.446
0.803	2.153	0.759	-0.002	0.128	-0.902	-0.816	-2.27	0.053	0.953	2.867	0.792	0.598	1.36	0.655	1.315	3.229	1.796	0.006	3.441	0.57	1.715	3.094	0.07	0.065	1.154	1.571	1.582	0.803	0.64	0.012	0.916	-0.736	-0.019	-0.668	-0.934	-0.579	-1.523	0.21	1.032	-1.01	-1.065	-0.591	-0.992	-1.879	0.103	-1.425	1.078	-1.006	-2.934
0.333	-2.254	-0.394	-0.746	0.111	-0.478	0.285	2.214	0.851	0.169	-2.932	-0.328	0.425	-1.469	-0.459	-0.313	-3.309	0.562	1.172	-3.433	-0.329	-0.367	-3.342	-1.155	0.957	-1.271	-1.452	1.081	-1.18	0.394	-0.854	-0.655	-0.456	-0.547	0.877	-0.406	-0.008	1.468	0.883	-1.404	1.412	-0.791	0.189	0.864	-1.238	-0.856	1.376	1.583	0.545	2.89
-2.08	-1.258	-0.931	-0.044	0.065	0.033	2.11	1.233	0.948	-2.286	-1.93	-1.168	-1.774	-0.546	-0.668	-3.361	-1.983	-1.318	-2.055	-2.669	-0.396	-1.833	-2.089	-2.152	-2.328	-0.292	0.264	-2.012	0.282	-1.376	-0.249	-0.427	-0.474	0.167	0.578	0.553	1.698	0.578	0.741	-0.284	0.319	1.498	-0.178	1.489	0.199	2.074	-0.22	1.499	2.41	1.849
-1.323	-1.751	-1.04	-0.135	0.441	-0.208	1.392	1.507	1.184	-1.211	-2.456	-1.033	-1.368	-0.954	-0.996	-1.919	-2.941	-1.742	-1.36	-2.956	-0.031	-0.229	-2.72	-1.498	-2.353	-0.71	-0.513	-1.544	-0.53	-2.013	-0.135	-0.309	-0.306	-0.133	1.198	-0.108	1.1	1.772	0.466	-1.103	1.434	0.484	-0.21	1.61	-1.148	2.002	1.638	-0.21	1.587	1.227
1.95	-1.36	-0.003	-0.322	-0.301	-0.187	-1.812	1.548	0.127	2.617	-1.246	-0.235	1.18	-1.428	0.221	3.037	-0.379	0.226	2.82	-1.073	-1.311	3.296	-2.079	-0.018	1.066	-1.376	1.291	0.776	-2.445	-0.115	0.428	-0.217	-0.301	-1.098	-0.381	-0.072	-1.823	0.941	-0.412	-1.224	-0.708	1.037	-1.359	-1.227	-0.716	-1.42	1.26	-1.422	-1.76	2.062
1.944	0.617	1.593	0.076	-0.028	-0.047	-1.966	-0.599	-1.591	2.068	1.023	2.17	1.741	0.188	0.945	1.433	0.662	2.996	1.737	2.056	1.991	3.168	1.079	2.487	1.878	-0.86	1.204	2.456	0.432	0.141	0.332	0.43	0.497	-0.168	-0.474	-0.606	-1.626	-0.179	-0.988	-0.173	-1.434	-0.111	0.494	-0.473	-1.527	-2.206	-0.217	-0.009	-2.21	-1.01
1.561	-1.264	-1.219	-0.147	0.713	-0.623	-1.404	0.658	1.766	1.745	-1.762	-1.708	1.319	-0.675	-0.72	2.342	-2.491	-1.167	2.307	-1.463	-2.563	0.904	-2.251	-2.125	2.133	0.036	-0.436	0.817	-1.219	0.077	0.167	0.241	-1.161	-0.428	1.084	0.002	-1.092	0.23	1.192	-1.295	1.816	-0.343	0.454	1.671	0.276	-1.864	-0.462	0.716	-1.67	1.101
0.45	-1.986	0.13	0.338	0.233	-0.858	-0.717	1.785	0.594	0.148	-2.538	-0.13	0.791	-1.321	0.344	0.615	-3.04	-1.008	-0.974	-2.301	-0.405	0.151	-3.361	0.601	1.809	-1.599	0.768	0.178	-0.982	1.249	0.934	-0.196	-0.601	-0.309	0.621	-0.99	-1.114	1.246	0.169	-1.041	0.006	-1.603	-0.061	1.41	-1.681	-2.075	1.544	-0.217	-0.294	2.25
1.111	-1.555	-1.502	-0.163	-0.233	0.318	-1	1.711	1.331	1.629	-1.475	-2.016	0.546	-1.559	-0.914	1.484	-2.355	-2.668	2.651	-1.564	-1.562	1.567	-0.462	-2.633	0.871	-2.352	-0.201	-0.445	-1.954	-1.311	0.348	-0.216	-0.233	-0.661	-0.247	0.892	-0.698	1.046	1.707	-0.365	-1.116	1.523	-1.674	-0.416	0.461	-1.35	0.972	2.599	-1.286	2.269
-1.9	1.357	-0.667	0.253	0.215	-0.433	1.733	-1.539	0.962	-2.528	1.132	-0.344	-1.162	1.521	-1.018	-3.21	1.963	-0.656	-2.429	1.047	0.724	-2.915	0.215	-0.78	-0.824	2.373	-0.326	-1.426	1.914	-1.964	0.024	0.441	-1.088	0.475	-0.031	0.222	1.532	-1.123	0.323	-0.447	-0.497	0.696	0.803	0.846	0.893	1.172	-1.916	-0.378	1.864	-1.872
-0.404	-0.759	-1.854	0.943	-0.474	0.07	-0.343	1.079	1.711	-1.039	-0.405	-1.881	0.315	-1.115	-1.754	-1.602	-0.824	-2.668	-0.773	0.627	-2.136	-1.738	-0.347	-1.021	0.814	-1.011	-2.804	0.297	-2.225	-1.495	1.227	-0.49	-0.655	0.567	-0.42	0.743	-0.118	0.914	0.946	1.282	-0.489	1.554	-0.105	-1.389	0.883	0.608	1.746	0.743	-0.519	1.152
-1.58	-0.927	-1.555	0.198	-0.349	-0.191	1.485	1.175	1.679	-2.206	-0.787	-1.317	-0.842	-1.065	-1.746	-2.289	0.262	-0.949	-2.616	-1.38	-0.421	-2.885	-0.97	-2.167	-0.563	-0.395	-2.644	-0.891	-2.168	-2.173	0.218	-1.02	-0.62	0.196	0.328	0.235	1.287	0.461	1.373	-0.852	0.289	0.742	0.245	1.178	-0.493	1.064	-0.206	2.232	1.601	1.848
2.258	1.199	0.572	-0.026	0.043	-0.034	-2.251	-1.217	-0.484	2.617	1.846	0.688	1.787	0.524	0.461	2.197	2.384	1.555	2.533	2.479	-0.255	3.746	1.576	0.792	2.05	-0.258	1.237	2.106	0.152	-0.517	0.285	0.7	0.261	-0.333	-0.615	-0.322	-1.89	-0.53	-0.293	-0.177	-1.421	0.348	0.147	-0.834	-1.289	-2.344	-0.105	0.682	-2.514	-1.864
0.589	-2.02	-1.412	0.31	0.268	-0.08	-0.769	1.863	1.438	0.431	-2.72	-1.373	0.721	-1.24	-1.395	-0.59	-2.994	-1.611	0.559	-3.091	-0.301	1.199	-3.202	-2.021	0.282	-0.671	-2.296	1.814	-1.106	-1.507	0.246	-0.495	-0.111	0.382	1.043	-0.032	0.014	1.766	1.22	-0.179	1.455	-0.887	1.381	1.285	-0.388	0.516	1.185	2.053	-1.479	1.914
-0.707	1.851	1.481	0.054	0.156	-0.372	0.681	-1.965	-1.281	-0.619	2.023	2.151	-0.743	1.587	0.724	-0.889	1.209	2.861	-1.363	2.774	2.433	0.388	2.465	2.486	-0.484	2.517	0.166	-1.813	1.375	0.516	0.124	0.37	0.374	-0.017	-0.065	-1.125	0.906	-1.202	-1.426	0.278	0.917	-1.554	-1.044	-0.358	-1.532	1.134	-1.108	-2.552	0.416	-2.617
-1.098	0.055	-2.114	-0.155	0.448	0.098	1.193	-0.286	1.998	-1.304	-0.601	-2.329	-0.831	0.75	-1.825	-2.037	-0.496	-3.011	-1.571	-1.256	-1.429	-0.428	-1.067	-2.811	-1.694	1.298	-1.487	-0.475	1.343	-2.701	0.146	0.662	-0.588	-0.457	0.245	0.774	0.549	0.232	1.971	-0.862	-0.804	0.662	-1.325	0.875	0.999	0.79	1.304	2.278	1.754	-0.755
-2.254	0.048	0.412	-0.007	-0.352	-0.881	2.246	0.284	0.356	-2.979	0.196	0.328	-1.456	-0.112	0.44	-3.275	-0.378	-0.533	-3.058	1.311	0.032	-3.6	-0.045	1.234	-1.186	-1.128	0.849	-0.998	0.626	1.145	-0.742	-0.135	-0.913	0.731	-0.502	-0.734	1.527	0.574	0.14	1.242	-0.647	-1.716	0.675	-1.463	-0.2	1.644	1.512	-0.427	2.882	-0.041
-2.539	-0.231	0.172	-0.015	0.006	0.087	2.553	0.241	-0.175	-3.138	0.066	-0.142	-1.836	-0.51	0.469	-3.997	-0.521	0.349	-3.231	-0.108	-1.275	-3.226	1.136	0.074	-1.7	-1.564	0.33	-1.783	-0.322	1.594	-0.689	0.28	-0.091	0.67	-0.254	0.289	1.846	0.597	-0.029	0.713	-1.235	-0.377	0.76	-0.516	1.414	1.557	1.08	-1.008	3.146	-0.139
0.752	-1.01	1.671	0.205	-0.738	-0.582	-0.995	1.581	-1.164	1.319	-0.642	1.928	0.131	-1.397	1.293	2.265	-1.05	1.428	1.483	-0.774	2.986	1.175	0.442	1.951	-0.778	-0.969	1.72	0.25	-2.465	1.704	0.052	-1.409	-0.214	0.293	-0.003	-0.841	-0.913	0.93	-0.698	0.314	-0.191	-1.949	1.163	0.536	-0.551	-1.807	0.29	-0.97	-1.002	2.15
-0.629	1.649	1.772	-0.036	-0.076	0.034	0.64	-1.629	-1.81	-0.945	2.298	1.827	-0.288	0.93	1.617	-1.276	2.469	2.889	-1.807	2.48	1.094	-0.098	3.041	1.731	-0.95	0.19	2.149	0.684	0.902	2.188	-0.339	0.616	0.179	0.266	-0.774	-0.112	0.447	-0.929	-1.615	-0.367	-1.479	0.406	1.297	-0.751	0.353	-0.443	-0.626	-2.225	0.798	-2.28
0.247	2.257	0.218	-0.021	-0.07	-0.941	-0.203	-2.177	0.68	0.261	2.94	0.019	0.203	1.481	0.378	0.473	3.582	0.922	-0.697	3.19	-0.45	1.075	3.084	-0.739	-0.5	1.24	1.222	1.249	1.282	0.612	-0.143	0.684	-0.905	0.112	-0.813	-0.814	-0.338	-1.383	0.552	1.121	-1.201	-1.075	-0.573	-1.297	-1.629	0.053	-0.799	1.423	-0.033	-2.878
0.169	-2.32	-0.084	-0.413	0.13	-0.692	0.167	2.21	0.729	-0.113	-2.982	-0.078	0.422	-1.552	-0.117	-1.105	-3.058	0.392	0.583	-3.646	0.457	-0.217	-3.376	-1.072	1.242	-1.49	-0.81	0.68	-1.293	0.927	-0.617	-0.606	-0.682	-0.152	0.854	-0.585	-0.047	1.432	0.809	-0.866	1.445	-1.217	0.83	0.903	-1.148	-0.925	1.172	1.42	0.344	2.895
-1.566	-0.26	-2.063	-0.004	-0.039	0.01	1.595	0.314	2.091	-1.698	-0.677	-2.629	-1.349	0.155	-1.42	-2.607	-0.217	-3.132	-1.987	-1.713	-2.321	-0.962	-0.751	-3.42	-2.093	0.145	-0.578	-1.199	1.248	-1.784	-0.065	-0.258	-0.719	0.07	0.204	0.75	1.494	0.16	1.292	-0.602	-0.412	1.301	-0.33	1.172	0.81	1.949	-0.885	1.072	1.615	0.458
-2.12	-1.216	0.318	-0.037	0.245	-0.312	2.147	1.042	-0.137	-2.36	-1.859	0.549	-1.784	-0.525	0.06	-3.447	-2.042	0.397	-2.231	-1.982	1.653	-1.783	-2.673	0.107	-2.256	0.294	0.739	-2.034	-0.254	-0.985	-0.252	-0.357	0.101	0.183	0.838	-0.724	1.71	1.001	-0.826	-0.226	1.817	-0.246	-0.212	0.824	-1.762	2.102	0.193	-1.494	2.481	1.067
1.737	-1.655	-0.291	-0.297	-0.136	-0.196	-1.579	1.747	0.391	2.456	-1.638	-0.262	0.945	-1.591	-0.303	2.852	-1.474	0.758	2.87	-0.972	-1.004	2.782	-2.615	-0.59	0.378	-2.194	0.449	0.663	-2.004	-1.255	0.455	-0.162	-0.094	-1.049	-0.103	-0.321	-1.743	1.297	-0.244	-1.445	-0.696	0.54	-1.26	-0.553	-1.254	-1.452	1.85	-1.189	-1.405	2.094
1.12	0.576	2.203	0.034	0.152	-0.073	-1.154	-0.715	-2.193	0.983	0.876	2.835	1.199	0.261	1.457	0.015	0.508	3.28	0.807	1.963	2.879	1.819	0.577	3.493	1.559	-0.782	1.614	2.087	0.809	1.112	-0.11	0.385	0.622	0.168	-0.102	-0.756	-1.178	-0.466	-1.464	0.82	-0.972	-0.656	0.776	0.572	-1.408	-1.462	-1.306	-0.818	-1.065	-0.931
1.086	-1.876	-0.852	-0.52	0.246	-0.705	-0.574	1.665	1.543	1.239	-2.434	-1.304	0.864	-1.224	-0.367	2.082	-3.073	-0.964	1.444	-2.09	-2.382	0.364	-3.066	-1.519	1.722	-0.594	-0.403	0.631	-1.666	0.608	-0.364	-0.463	-0.938	-0.568	0.916	-0.348	-0.25	1.031	1.152	-1.658	1.073	-0.586	-0.031	1.689	-0.897	-0.65	0.141	1.611	-0.895	2.245
-1.246	-1.531	-0.061	0.582	-0.143	-0.788	0.718	1.642	0.724	-1.841	-1.649	-0.483	-0.558	-1.365	0.34	-1.526	-2.491	-1.26	-2.17	-0.757	-0.985	-2.672	-2.002	0.177	-0.177	-2.261	0.795	-0.791	-0.723	1.22	0.64	-0.841	-0.494	0.435	0.575	-0.979	0.207	1.557	0.145	-0.426	0.588	-1.684	1.434	0.923	-1.351	0.113	2.603	-0.361	1.208	1.649
1.272	-1.838	-0.883	-0.024	0.024	0.487	-1.249	1.879	0.639	1.437	-2.062	-1.559	1.046	-1.503	-0.161	1.562	-3.21	-1.434	2.438	-1.675	-1.911	0.785	-1.865	-2.398	1.984	-1.548	0.518	0.315	-2.209	0.257	0.407	-0.052	-0.162	-0.448	0.115	1.153	-0.801	1.586	1.232	0.132	-0.241	2.053	-1.299	-0.585	1.044	-1.382	1.786	2.173	-1.643	2.087
-2.012	1.121	0.389	-0.312	-0.341	-0.14	2.149	-0.888	-0.269	-1.856	1.668	0.798	-2.124	0.472	-0.027	-2.597	2.378	0.554	-0.846	1.956	0.459	-1.913	1.697	1.905	-2.117	0.772	-1.101	-3.112	0.009	0.208	-1.005	-0.494	0.182	0.364	-0.167	-0.451	1.4	-1.107	-0.014	0.705	0.847	-0.051	0.316	-0.198	-1.593	1.496	-1.254	1.055	2.787	-0.627
-0.734	-1.375	-1.652	0.043	0.372	-0.436	0.713	1.156	1.934	-1.229	-1.81	-1.339	-0.202	-0.832	-1.936	-1.223	-2.678	-1.91	-2.234	-1.304	-1.371	-0.938	-2.096	-0.3	-0.54	-0.766	-3.005	0.822	-1.316	-2.026	-0.059	0.514	-1.22	0.144	0.226	0.338	0.611	1.405	1.167	0.974	-0.476	0.318	-0.721	-0.235	0.858	1.51	1.846	0.62	0.789	0.867
-1.597	-0.731	-1.444	0.257	-0.401	-0.288	1.447	0.963	1.628	-2.186	-0.382	-1.217	-0.9	-1.109	-1.624	-2.054	0.712	-1.055	-2.571	-0.947	-0.346	-2.989	-0.36	-1.988	-0.466	-0.623	-2.532	-1.192	-2.102	-1.855	0.034	-1.129	-0.47	0.473	0.323	-0.116	1.301	0.27	1.237	-0.376	0.979	0.176	1.07	0.785	-0.97	0.85	-0.435	1.948	1.537	1.616
2.116	1.343	0.421	-0.054	0.089	-0.054	-2.12	-1.453	-0.349	2.386	1.994	0.657	1.738	0.644	0.171	2.192	2.29	1.722	2.026	2.776	-0.023	3.518	1.918	0.537	2.005	-0.141	0.886	2.115	0.434	-0.864	0.19	0.75	0.165	-0.314	-0.587	-0.253	-1.83	-0.789	-0.075	0.308	-1.329	0.264	-0.159	-0.755	-1.343	-2.004	-0.73	1.068	-2.32	-2.074
1.946	-0.412	-1.426	0.101	0.39	0.205	-1.988	0.181	1.264	2.143	-0.96	-1.86	1.663	0.175	-0.953	1.483	-1.163	-2.766	1.959	-1.954	-1.388	3.232	-0.831	-2.013	1.686	1.164	-1.412	2.392	0.258	-0.006	0.323	-0.128	-0.329	-0.119	0.899	0.73	-1.241	0.233	1.628	-0.328	1.926	0.464	0.829	1.099	1.338	-0.983	-0.766	2.009	-2.623	0.165
0.129	2.347	0.514	0.407	-0.168	0.012	-0.386	-2.257	-0.528	-0.271	2.84	0.862	0.525	1.737	0.155	-1.308	2.886	0.358	0.138	3.859	0.677	-0.391	2.685	2.008	1.531	1.725	0.537	0.719	1.965	-0.884	-0.075	0.353	0.286	0.877	-0.689	-0.271	0.271	-2.114	-0.152	1.886	-0.682	0.305	1.098	-0.502	-1.333	1.07	-2.774	-0.549	-0.97	-2.318
-0.85	-0.931	-2.043	-0.002	-0.014	0.027	0.924	0.943	1.999	-1.588	-1.037	-2.137	-0.053	-0.83	-1.854	-1.741	-0.869	-3.238	-2.125	-0.259	-1.63	-2.001	-2.04	-1.886	0.247	0.17	-2.313	0.665	-1.582	-2.268	0.176	-0.676	-0.318	-0.13	0.662	0.346	0.728	1.409	1.369	-1.15	0.524	0.72	-0.357	1.43	-0.456	1.611	1.77	0.83	1.059	0.471
-2.129	-0.632	0.787	-0.059	-0.176	-0.874	2.207	0.806	-0.039	-2.846	-0.599	0.797	-1.342	-0.624	0.692	-3.255	-1.239	-0.059	-3.238	0.374	0.934	-3.191	-1.162	1.69	-0.861	-1.605	0.844	-0.954	-0.033	1.524	-0.815	-0.102	-0.716	0.721	-0.226	-0.898	1.444	0.639	0.108	0.869	0.219	-1.9	1.12	-1.294	-0.845	0.899	1.553	0.147	2.892	0.921
-2.439	0.689	0.09	-0.036	-0.053	-0.244	2.5	-0.616	0.094	-3.038	0.406	0.372	-1.724	0.94	-0.192	-3.817	1.14	0.53	-2.784	-0.178	1.294	-3.596	-0.33	-0.319	-1.418	1.924	0.207	-1.95	1.265	-1.279	-0.764	-0.222	-0.065	0.695	0.125	-0.411	1.734	-0.828	0.156	0.859	1.15	0.045	0.729	0.224	-1.519	1.443	-0.986	1.136	3.166	-0.365
-0.554	-0.726	1.886	0.373	-0.922	-0.306	0.15	1.477	-1.641	-0.174	-0.401	2.418	-0.908	-1.064	1.248	0.644	-1.083	2.728	-0.855	-0.462	3.355	0.428	0.513	2.135	-1.782	-0.474	0.916	-1.496	-1.966	1.564	-0.026	-1.516	0.054	0.66	-0.247	-0.643	-0.154	0.763	-1.416	1.415	-0.629	-1.385	1.305	0.246	0.073	-0.495	0.199	-2.357	0.487	2.097
-0.112	2.191	1.291	-0.101	-0.077	0.075	0.192	-2.155	-1.357	-0.539	2.781	1.438	0.302	1.486	1.101	-0.107	3.351	2.322	-1.68	2.534	1.53	-0.537	3.512	0.591	0.798	1.09	2.018	1.105	1.835	0.509	-0.553	0.477	0.297	0.351	-0.625	-0.152	-0.302	-1.612	-1.078	0.708	-1.241	0.67	1.216	-0.171	-0.638	-1.056	-2.219	-0.484	0.693	-2.61
0.777	2.261	0.31	0.655	-0.372	-0.391	-1.301	-1.973	0.013	0.73	2.906	0.061	0.838	1.506	0.516	0.639	3.646	0.853	-0.231	3.071	-0.468	1.558	3.209	-0.648	-0.006	1.295	1.198	1.741	1.395	1.15	0.745	0.361	-0.587	0.468	-1.073	-0.144	-1.027	-1.277	-0.254	0.869	-1.186	0.914	1.056	-1.823	-0.77	-1.581	-0.523	0.355	-1.469	-2.611
0.113	-2.349	-0.604	0.219	0.33	-0.714	-0.356	2.084	1.242	0.104	-2.939	-1.041	0.123	-1.654	-0.181	-0.946	-2.993	-1.443	0.413	-3.813	-0.4	0.787	-2.856	-1.928	1.071	-1.663	0.42	-0.77	-1.676	0.487	0	-0.326	-1.053	0.382	0.949	-0.263	-0.566	1.367	0.907	0.519	1.768	-0.968	1.392	0.825	0.259	-1.651	1.407	0.633	-0.127	2.742
-2.008	-0.77	-1.448	-0.048	0.1	0.003	2.062	0.714	1.445	-2.206	-0.855	-2.156	-1.723	-0.642	-0.693	-3.282	-1.165	-2.101	-1.635	-1.628	-2.683	-2.138	0.033	-2.785	-1.569	-1.594	-0.066	-2.445	-0.016	-0.159	-0.382	0.097	-0.676	0.3	0.106	0.686	1.777	0.629	0.681	0.328	-0.939	1.06	-0.32	0.745	1.301	2.423	-0.108	0.175	2.255	0.772
-0.88	-1.911	1.406	-0.265	0.244	-0.078	1.043	1.733	-1.403	-0.607	-2.522	1.702	-1.093	-1.22	1.028	-1.513	-2.984	2.14	-0.039	-2.218	2.559	-0.09	-3.231	0.994	-1.468	-0.608	1.86	-2.006	-1.458	0.452	-0.066	-0.456	0.147	-0.469	0.933	-0.325	0.275	1.505	-1.532	-0.355	1.656	0.515	-1.565	1.028	-0.546	0.418	0.719	-2.352	1.716	1.913
1.354	-1.765	1.1	-0.044	-0.084	-0.353	-1.322	1.808	-0.883	1.871	-1.833	1.607	0.782	-1.605	0.547	1.4	-1.66	2.61	2.761	-1.142	1.545	2.078	-2.925	1.539	-0.167	-2.241	0.697	1.363	-1.944	-0.344	0.372	-0.177	0.286	-0.457	0.009	-0.995	-0.7	1.456	-1.276	-1.418	-0.59	-0.95	0.171	-0.483	-1.86	0.22	2.01	-1.104	-1.894	2.051
0.169	-0.249	2.57	-0.152	0.1	0.001	-0.093	0.19	-2.572	-0.002	-0.013	3.221	0.345	-0.441	1.82	-1.148	0.037	3.23	0.447	0.969	3.448	0.234	-0.82	3.94	-0.176	-1.361	1.55	1.442	-0.596	1.868	-0.144	0.483	0.678	-0.17	-0.288	-0.661	-0.244	0.613	-1.904	-0.981	-1.027	-0.732	0.853	-0.779	-0.759	-1.21	1.125	-1.929	0.03	-0.255
1.023	-2.08	-0.512	-0.052	0.335	-0.801	-0.966	1.796	1.242	1.158	-2.69	-0.85	0.829	-1.376	-0.189	1.86	-3.275	-0.174	1.467	-2.557	-1.823	0.281	-3.311	-1.099	1.776	-0.84	-0.08	0.426	-1.548	0.786	0.02	-0.383	-1.021	-0.127	1.002	-0.445	-0.86	1.064	0.871	-0.552	1.664	-1.211	0.91	1.442	-0.333	-1.928	0.717	0.725	-1.005	2.487
-1.368	-0.862	-1.249	0.746	0.173	-0.56	0.718	0.757	1.802	-1.845	-0.467	-1.599	-0.784	-1.228	-0.858	-1.647	-0.415	-2.677	-2.015	0.606	-1.153	-2.747	-1.201	-1.596	-0.547	-2.215	-1.47	-1.175	-1.427	0.153	0.626	-0.553	-0.799	0.758	0.876	-0.23	0.233	1.075	1.251	0.086	1.549	-0.835	1.772	1.236	-0.282	0.202	2.232	1.386	1.194	0.46
1.355	-1.662	-1.309	0.095	-0.091	0.49	-1.416	1.689	1.026	1.498	-1.723	-2.038	1.168	-1.529	-0.5	1.794	-2.715	-2.252	2.256	-1.011	-2.461	0.597	-1.556	-2.628	2.167	-1.555	0.021	0.493	-2.345	-0.165	0.517	-0.132	-0.13	-0.326	-0.055	1.115	-0.899	1.332	1.52	0.315	-0.359	2.012	-1.059	-0.816	0.994	-1.434	1.232	2.55	-1.877	1.945
-1.969	0.66	1.054	0.033	-0.22	0.408	1.968	-0.528	-1.288	-2.116	1.329	0.969	-1.721	-0.068	1.163	-3.209	1.548	1.188	-2.069	1.59	-0.102	-1.429	2.05	1.381	-2.184	-0.673	0.344	-2.144	-0.517	2.181	-0.222	-0.361	1.074	0.299	-0.094	-0.266	1.712	-0.533	-0.522	0.145	1.01	-0.394	-0.297	-0.669	-1.058	2.458	-0.021	0.127	2.131	-0.484
-1.238	-0.272	-2.035	0.116	-0.565	-0.063	1.15	0.673	2.082	-1.547	0.377	-2.203	-0.847	-0.951	-1.774	-2.61	0.223	-2.677	-0.937	0.743	-2.994	-1.592	1.108	-1.454	-0.496	-1.411	-2.768	-1.524	-1.683	-1.381	0.273	-0.922	-0.748	-0.042	-0.194	0.61	1.247	0.314	1.345	-0.613	-0.867	1.2	-0.678	0.75	0.432	1.92	-0.506	1.457	0.981	0.992
-1.918	-0.668	-1.209	0.094	-0.474	-0.069	1.912	0.952	1.263	-2.455	-0.195	-1.038	-1.279	-1.171	-1.325	-2.052	0.862	-1.037	-2.948	-0.451	-0.106	-3.274	-0.277	-1.815	-0.862	-0.87	-2.361	-1.661	-2.248	-1.398	-0.156	-1.167	-0.287	0.357	0.219	0.143	1.581	0.244	1.068	-0.474	0.646	0.72	0.489	0.884	-0.789	1.193	-0.351	1.948	2.174	1.614
1.757	1.888	0.034	-0.064	0.097	-0.206	-1.708	-1.95	0.155	1.834	2.585	0.175	1.59	1.126	-0.122	1.471	2.788	1.203	1.279	3.23	-0.433	2.925	2.804	0.102	2.127	0.487	0.564	2.062	0.909	-1.096	0.071	0.857	-0.182	-0.188	-0.667	-0.19	-1.574	-1.174	0.301	0.463	-1.21	0.437	-0.048	-0.872	-1.284	-1.653	-0.943	1.399	-1.765	-2.643
2.254	0.72	-0.589	-0.209	0.3	0.17	-2.113	-0.919	0.517	2.844	0.433	-0.921	1.551	0.978	-0.238	2.768	0.372	-2.039	2.963	-0.576	-0.397	3.805	0.984	-0.613	1.191	1.878	-0.91	1.9	1.299	0.787	0.431	-0.049	-0.099	-0.825	0.633	0.463	-1.883	-0.347	1.037	-1.33	1.231	-0.342	-0.587	1.397	1.319	-1.352	-0.77	1.984	-2.278	-1.408
-1.07	1.857	0.95	0.515	0.096	-0.061	0.759	-1.981	-0.841	-1.686	1.907	1.336	-0.394	1.694	0.555	-2.44	1.323	0.806	-1.963	3.052	1.186	-1.538	1.759	2.407	0.373	2.373	0.926	-0.502	2.114	-0.456	-0.069	0.261	0.397	1.095	-0.065	-0.508	1.379	-1.571	-0.535	2.018	0.421	-0.238	0.829	0.276	-1.5	2.184	-1.556	-1.319	0.166	-2.31
-0.908	0.285	-2.026	0.496	-0.1	-0.292	0.629	-0.247	2.206	-1.536	0.553	-1.853	-0.21	-0.046	-2.145	-2.313	-0.064	-1.423	-1.92	0.951	-2.781	-1.396	1.318	-1.091	0.51	0.72	-2.486	-0.249	-0.737	-2.996	0.342	-0.626	-0.817	0.659	0.428	0.237	1.188	-0.049	1.616	-0.231	1.143	0.472	1.388	1.068	-0.256	1.734	-1.008	1.389	0.086	-0.412
-2.116	-0.594	0.854	-0.25	0.588	-0.637	2.332	0.122	-0.284	-2.764	-0.575	1.113	-1.38	-0.554	0.537	-3.513	-1.005	0.342	-3.08	0.492	1.158	-3.046	-1.105	2.038	-1.228	-1.495	0.003	-0.76	-0.575	1.429	-0.932	0.66	-0.274	0.474	0.451	-0.896	1.619	0.277	0.061	0.723	1.276	-1.58	0.306	-0.413	-1.589	1.942	1.094	0.736	2.918	-0.008
-2.187	0.555	1.252	-0.039	-0.011	-0.1	2.18	-0.576	-1.202	-2.692	0.248	1.679	-1.61	0.821	0.778	-3.299	1.103	2.107	-2.174	-0.383	2.451	-3.342	-0.361	0.99	-0.978	1.495	1.416	-1.988	1.413	-0.135	-0.665	-0.261	0.248	0.58	0.239	-0.453	1.487	-0.886	-0.97	1.196	0.757	0.293	0.352	1.041	-1.23	1.672	-1.655	-0.12	2.781	-0.245
-0.272	-0.848	2.058	0.911	0.274	0.11	-0.427	0.537	-2.165	-0.463	-0.578	2.657	0.007	-1.083	1.357	0.271	-0.696	3.544	-1.345	-1.186	3.034	-0.802	0.498	2.634	-0.933	-1.154	0.71	0.418	-2.136	1.6	1.101	-0.292	0.62	0.623	0.748	-0.414	-0.236	0.071	-1.523	1.396	1.309	-0.913	-0.054	1.5	0.003	0.286	-0.828	-1.994	-0.556	1.01
0.634	1.225	2.139	0.05	0.021	-0.017	-0.622	-1.193	-2.119	0.423	1.775	2.526	0.821	0.639	1.669	1.309	2.047	3.147	-0.434	1.548	3.167	0.058	2.521	1.798	0.589	-0.271	2.281	1.928	0.691	1.297	-0.096	0.579	0.453	0.219	-0.524	-0.49	-0.7	-0.486	-1.734	-0.006	-1.493	0.011	1.265	-0.597	-0.8	-1.79	-0.335	-1.467	-0.51	-1.846
0.166	0.829	1.827	1.062	0.006	-0.604	-1.083	-0.91	-1.377	0.266	1.352	2.298	0.118	0.262	1.268	-0.491	1.41	3.12	0.209	2.325	1.698	1.275	1.247	2.813	-0.885	0.405	0.833	0.095	-0.707	1.715	1.106	0.422	0.096	0.877	-0.439	-1.264	-0.614	-0.391	-1.748	1.287	-1.435	-1.113	1.521	0.071	-1.993	-0.961	0.65	-1.582	-1.467	-1.403
0.745	-2.249	0.73	0.623	0.216	-0.218	-1.309	2.074	-0.474	1.016	-2.916	0.551	0.458	-1.494	0.858	0.625	-3.397	-0.402	0.708	-3.524	1.425	2.158	-2.818	0.446	1.038	-1.035	1.687	-0.61	-1.528	1.097	0.735	-0.545	-0.329	0.405	0.953	-0.059	-1.067	1.307	-0.361	1.088	1.575	-0.715	0.763	1.132	1.009	-1.248	0.952	-1.433	-1.448	2.781
-1.988	0.155	-1.725	0.016	-0.014	-0.034	1.98	-0.146	1.707	-2.548	-0.217	-2.053	-1.343	0.499	-1.32	-3.028	0.509	-2.746	-3.326	-0.539	-1.29	-2.25	-1.097	-2.684	-1.701	1.36	-0.752	-0.655	0.89	-2.075	-0.541	-0.399	-0.398	0.57	0.362	0.314	1.488	-0.516	1.159	0.168	1.154	0.981	1.196	0.983	-0.343	0.898	-1.227	1.872	2.394	0.26
-0.357	-1.088	2.041	-0.635	0.33	-0.155	0.778	0.869	-1.959	-0.265	-1.75	2.304	-0.482	-0.376	1.685	0.16	-1.728	3.333	0.457	-2.397	1.715	-1.219	-2.319	2.253	0.502	0.232	1.785	-1.269	0.188	2.221	-0.679	-0.351	0.149	-0.566	1.011	-0.457	-0.003	0.975	-1.872	0.147	1.648	0.139	-1.541	1.52	-0.436	-0.63	0.254	-2.487	1.489	0.756
1.461	-1.861	0.749	-0.099	-0.105	-0.331	-1.363	1.881	-0.529	1.962	-1.963	1.249	0.894	-1.682	0.221	1.541	-2.112	2.287	2.635	-1.125	1.239	2.537	-2.892	1.011	0.037	-2.314	0.394	1.329	-1.795	-0.86	0.342	-0.287	0.275	-0.522	0.065	-0.935	-0.91	1.537	-1.099	-1.48	-0.504	-0.84	0.035	-0.135	-1.914	-0.037	2.133	-1.335	-1.76	2.113
0.108	-0.796	2.464	0.132	0.12	-0.01	-0.185	0.701	-2.487	-0.121	-0.705	3.158	0.32	-0.831	1.656	-1.227	-0.701	3.161	0.179	0.242	3.662	0.346	-1.518	3.816	-0.01	-1.825	1.372	1.451	-0.862	1.675	-0.138	0.196	0.672	0.386	0.015	-0.701	-0.393	0.863	-1.693	0.225	-0.983	-1.022	1.439	0.399	-0.718	-1.483	0.464	-1.657	0.08	0.515
1.125	-1.918	-0.932	0.005	0.503	-0.678	-1.107	1.452	1.548	1.068	-2.588	-1.269	1.131	-1.154	-0.596	1.902	-3.179	-0.997	0.929	-2.457	-2.363	0.114	-3.079	-1.048	2.131	-0.735	-0.765	1.142	-1.258	0.527	0.101	-0.146	-1.086	-0.075	1.068	-0.163	-0.933	0.814	1.083	-0.634	1.894	-0.712	0.926	1.506	0.061	-1.925	0.401	0.693	-1.232	2.059
-1.455	-0.569	-1.192	0.621	0.589	-0.632	0.882	0.097	1.719	-2.078	-0.216	-1.109	-0.724	-0.894	-1.277	-2.393	0.426	-1.987	-1.928	0.456	-0.247	-2.92	-0.895	-0.881	-0.616	-1.393	-2.315	-0.701	-1.774	-0.51	0.534	0.042	-1.179	0.605	1.058	0.001	0.358	0.668	1.494	-0.069	1.899	-0.206	1.681	1.469	-0.129	0.597	1.527	2.132	1.375	-0.403
0.965	-1.23	-1.893	-0.236	-0.27	0.194	-0.861	1.377	1.781	1.554	-1.221	-2.293	0.33	-1.18	-1.391	1.435	-1.996	-3.103	2.44	-1.561	-1.717	1.759	-0.174	-2.732	0.288	-2.293	-1.09	-0.543	-0.85	-2.033	0.457	-0.302	-0.161	-0.929	-0.239	0.543	-0.991	0.558	1.865	-1.246	-1.24	0.735	-1.657	0.225	-0.043	-1.988	0.602	2.332	-0.746	2.08
-2.13	0.562	0.862	0.126	0.282	0.317	2.061	-0.75	-1.082	-2.669	0.38	0.395	-1.489	0.757	1.308	-3.588	0.382	1.031	-2.435	-0.667	0.001	-2.834	1.2	-0.328	-1.309	0.023	2.08	-1.689	1.727	1.788	-0.192	0.909	0.537	0.448	-0.354	0.085	1.659	-0.09	-0.799	-0.351	-0.895	-0.44	0.669	-0.913	1.018	1.292	0.415	-1.735	2.382	-1.38
-1.375	-1.107	-1.481	0.261	-0.339	-0.143	1.206	1.276	1.588	-1.733	-0.611	-1.836	-0.919	-1.609	-1.071	-2.707	-0.976	-2.372	-1.133	-0.121	-2.638	-2.04	0.178	-1.151	-0.731	-2.541	-1.726	-1.435	-1.992	-0.18	0.394	-0.971	-0.582	0.12	0.27	0.314	1.364	0.641	1.075	-0.769	0.044	0.968	-0.122	1.126	-0.303	1.746	-0.208	1.788	0.994	1.86
-2.132	-0.273	-1.05	0.105	-0.252	-0.31	2.08	0.446	1.196	-2.662	-0.075	-0.627	-1.502	-0.489	-1.46	-2.468	0.892	-0.095	-2.915	-0.883	0.117	-3.566	0.047	-1.242	-1.198	0.249	-2.188	-1.719	-1.448	-1.986	-0.31	-0.858	-0.582	0.529	0.356	-0.057	1.676	-0.103	0.799	-0.176	0.826	0.645	0.75	1.05	-0.868	1.281	-0.872	1.513	2.397	0.983
2.596	-0.053	0.357	-0.004	-0.083	0.069	-2.606	0.076	-0.411	3.152	0.323	0.607	1.919	-0.408	0.11	3.307	0.29	1.717	3.185	1.433	0.311	4.026	-0.138	0.156	1.974	-1.424	0.568	1.948	-0.672	-1.008	0.587	0.161	0.49	-0.594	-0.347	-0.346	-1.931	0.36	-0.091	-0.697	-1.467	-0.141	-0.344	-0.123	-1.404	-2.074	0.504	0.942	-3.169	-0.239
2.407	0.391	0.578	-0.18	0.38	0.002	-2.321	-0.576	-0.541	2.943	0.003	0.903	1.743	0.772	0.237	3.213	-0.889	0.215	2.807	-0.481	1.924	3.931	0.508	0.927	1.94	1.138	-0.811	1.674	1.751	0.816	0.429	-0.007	0.278	-0.796	0.786	-0.264	-2.171	0.068	-0.089	-0.539	0.817	-1.374	-0.863	1.697	0.295	-2.358	-0.27	0.945	-2.381	-1.141
-0.825	2.02	1.245	0.355	-0.084	0.132	0.586	-2.032	-1.369	-1.274	2.276	1.741	-0.341	1.649	0.7	-2.363	2.008	1.664	-1.245	3.348	1.7	-0.986	2.042	2.84	0.667	2.031	0.892	-0.607	2.056	-0.292	-0.254	0.134	0.527	0.964	-0.315	-0.283	0.959	-1.82	-0.704	1.863	-0.087	0.376	1.05	0.372	-1.167	2.029	-1.835	-0.931	0.222	-2.17
-1.749	-0.439	-1.334	0.084	-0.413	0.036	1.716	0.632	1.277	-1.871	0.113	-1.788	-1.551	-1.02	-0.797	-2.329	0.924	-1.177	-2.555	-0.056	-2.631	-0.949	0.452	-2.274	-1.264	-2.009	-1.215	-2.536	-1.167	-0.358	-0.62	-0.65	0.296	0.779	-0.193	-0.245	1.933	0.055	0.756	0.709	0.819	-0.731	1.14	-1.037	-0.854	2.189	-0.794	1.349	1.457	1.152
-2.549	-0.213	0.444	0.05	-0.033	0.228	2.53	0.215	-0.576	-3.105	-0.676	0.344	-1.878	0.219	0.535	-3.196	-1.536	0.977	-3.112	-0.956	-0.738	-3.947	0.045	0.548	-1.903	0.588	1.616	-1.953	1.153	-0.07	-0.552	-0.548	0.29	0.651	0.484	0.177	1.927	-0.241	-0.271	0.795	1.017	1.24	0.351	1.191	-0.663	2.359	-0.861	0.486	3.036	0.682
-2.298	-0.815	0.722	-0.026	-0.047	-0.058	2.289	0.859	-0.694	-2.955	-0.794	0.581	-1.544	-0.793	0.814	-3.56	-1.284	1.381	-3.297	-1.51	-0.253	-3.23	0.219	0.316	-1.206	-1.854	1.059	-1.346	-0.156	1.682	-0.734	-0.23	-0.322	0.674	0.138	0.192	1.574	0.607	-0.963	1.179	-0.751	0.689	0.667	0.931	0.994	1.851	-0.213	-1.68	2.898	1.07
-0.429	-0.203	2.017	0.608	0.911	0.041	0.007	-0.537	-2.027	-1.146	-0.117	2.158	0.374	-0.234	1.81	-1.297	0.8	2.79	-1.5	-1.048	2.715	-1.776	-0.139	1.213	0.502	-1.344	1.376	0.884	0.071	2.765	0.918	0.788	0.785	0.261	0.904	-0.69	0.43	-0.408	-1.354	0.855	1.704	-1.189	-0.838	1.158	-0.615	1.52	-0.726	-1.456	-0.406	-0.565
1.247	-0.054	2.269	0.171	0.044	-0.06	-1.358	0.008	-2.21	1.351	0.334	2.89	1.1	-0.44	1.564	2.017	-0.148	3.531	0.36	0.601	3.331	1.905	1.186	2.537	0.395	-1.237	1.79	2.093	-0.703	1.164	0.36	0.44	0.537	-0.018	-0.341	-0.644	-0.915	0.383	-1.664	-0.623	-1.239	-0.384	0.849	-0.805	-1.215	-1.584	0.94	-1.033	-1.734	-0.387
0.205	0.407	2.034	1.033	0.301	-0.467	-1.076	-0.571	-1.674	0.322	0.733	2.621	0.118	0.107	1.341	-0.412	0.347	3.42	0.252	1.86	2.551	1.402	0.44	3.015	-0.926	0.081	0.989	0.345	-0.989	1.47	1.1	0.608	0.247	0.833	-0.021	-1.152	-0.58	0.083	-1.754	1.133	-1.11	-1.167	1.481	0.498	-1.854	-1.113	0.976	-1.452	-1.459	-1.175
-0.207	-2.291	-0.022	0.776	0.099	-0.465	-0.482	2.231	0.469	-0.182	-2.952	-0.31	-0.179	-1.525	0.252	-0.734	-3.045	-1.326	-0.736	-3.634	0.338	0.84	-3.269	-0.5	0.244	-1.535	1.319	-1.266	-1.221	0.239	0.653	-0.652	-0.679	0.777	0.827	-0.167	-0.537	1.448	0.323	1.143	1.42	-0.976	1.53	0.99	0.62	-1.406	1.245	-0.397	-0.371	2.946
-1.88	0.501	-1.512	0.286	-0.241	-0.297	1.666	-0.356	1.688	-2.618	0.43	-1.521	-1.071	0.519	-1.431	-2.934	1.138	-2.315	-3.043	0.807	-0.546	-3.011	-0.618	-1.829	-0.75	1.574	-1.328	-0.511	0.222	-2.389	-0.479	-0.366	-0.334	1.045	-0.114	-0.269	1.753	-0.783	0.989	1.328	0.93	-0.167	1.42	-0.406	-1.213	1.54	-1.851	1.117	1.534	0.079
-1.508	-1.794	0.25	-0.026	-0.004	-0.219	1.523	1.797	-0.076	-1.356	-2.366	0.64	-1.611	-1.107	-0.136	-2.224	-3.072	0.62	-1.074	-2.015	1.632	-0.568	-3.035	0.215	-2.637	-0.816	-0.026	-1.625	-1.407	-1.224	-0.705	0.043	0.121	0.661	-0.067	-0.539	1.69	0.961	-0.126	0.482	-0.003	-1.607	1.047	-1.043	-0.349	2.023	0.628	0.888	1.294	2.534
0.273	-1.27	2.11	-0.015	-0.299	-0.371	-0.165	1.43	-1.852	0.259	-1.066	2.83	0.306	-1.419	1.301	-0.766	-0.62	2.95	0.978	-0.269	3.115	0.285	-2.024	3.425	-0.55	-2.134	1.107	1.196	-1.956	1.027	0.091	-0.191	0.378	-0.089	-0.406	-1.124	0.201	0.742	-2.037	-1.129	-0.764	-1.238	0.606	-1.225	-1.544	1.299	0.923	-2.174	-0.522	2.001
0.701	-0.614	2.412	0.22	0.27	-0.027	-0.849	0.408	-2.382	0.476	-0.612	3.08	0.907	-0.532	1.649	-0.594	-0.917	3.246	0.582	0.439	3.528	1.05	-1.457	3.544	0.665	-1.588	1.318	2.034	-0.542	1.54	0.053	0.34	0.712	0.368	0.164	-0.767	-0.787	0.625	-1.593	0.843	-0.821	-0.948	1.186	0.816	-1.096	-1.65	0.374	-1.056	-0.845	0.159
0.753	-1.731	-1.444	-0.358	0.538	-0.57	-0.377	1.289	1.951	0.766	-2.243	-1.965	0.676	-1.118	-0.909	-0.167	-2.9	-1.801	1.663	-2.817	-1.706	0.765	-1.856	-2.99	1.67	-0.634	-0.979	0.606	-1.645	0.097	-0.459	-0.067	-0.991	-0.19	1.068	-0.052	-0.191	0.715	1.461	-1.044	1.759	-0.313	0.775	1.512	-0.282	-1.066	0.04	1.492	-0.521	1.849
-0.757	0.212	-1.945	0.92	-0.222	-0.195	-0.063	-0.026	2.108	-0.786	0.838	-2.341	-0.665	-0.466	-1.491	0.139	1.125	-2.817	-0.892	1.709	-1.668	-1.694	0.768	-2.966	-0.577	-1.297	-2.192	-1.523	-0.634	-0.77	0.703	-0.723	-0.74	1.002	0.281	0.39	-0.062	0.552	1.53	1.033	1.203	-0.173	2.093	0.186	0.773	0.322	1.454	2.137	-0.014	-0.559
1.753	-0.74	-1.618	-0.255	-0.277	0.006	-1.586	0.873	1.644	2.485	-0.685	-1.695	0.962	-0.778	-1.458	2.655	-0.923	-2.749	3.113	-1.175	-1.031	2.604	0.387	-1.695	0.712	-1.841	-1.273	0.385	-0.368	-2.35	0.461	-0.115	-0.174	-0.986	-0.44	0.189	-1.524	0.075	1.548	-1.094	-1.603	0.312	-1.564	-0.021	-0.655	-2.545	-0.219	1.775	-1.607	1.586
-1.835	0.871	1.397	-0.254	0.066	-0.231	1.965	-0.85	-1.234	-1.977	0.462	1.965	-1.65	1.253	0.743	-2.646	1.129	2.651	-0.997	0.136	2.407	-2.41	-0.534	1.745	-1.064	2.213	0.913	-2.577	1.729	0.304	-0.939	0.442	-0.392	0.424	-0.276	-0.068	1.203	-0.585	-1.336	0.245	-1.26	0.444	1.105	0.366	0.601	0.694	-1.442	-1.889	2.635	-1.074
-1.463	-1.399	-1.329	0.313	-0.227	-0.272	1.272	1.499	1.533	-2.03	-1.053	-1.671	-0.797	-1.715	-0.965	-2.93	-1.721	-1.643	-1.767	-0.881	-2.749	-2.364	-0.168	-1.184	-0.502	-2.579	-1.473	-0.942	-1.995	0.12	0.468	-0.744	-0.813	0.17	0.275	0.286	1.401	0.903	0.974	-0.447	-0.191	1.127	-0.452	1.096	-0.044	2.013	0.05	1.4	1.081	2.021
-1.433	-0.003	-1.848	0.109	-0.359	-0.203	1.35	0.265	1.982	-1.972	0.456	-1.707	-0.815	-0.504	-1.929	-1.618	1.412	-1.288	-2.673	-0.086	-1.022	-2.569	0.688	-2.619	-0.122	-0.075	-2.629	-1.135	-1.466	-2.419	-0.069	-0.918	-0.696	0.282	0.213	0.281	1.097	-0.282	1.472	-0.629	0.614	0.647	0.92	0.927	-0.33	0.553	-1.076	1.96	1.535	0.811
2.375	-1.03	0.114	-0.008	0.039	-0.074	-2.372	1.03	-0.093	2.92	-1.105	0.566	1.73	-0.892	-0.319	2.728	-1.777	1.392	3.345	-0.141	0.882	3.685	-1.622	0.03	1.342	-1.917	-0.682	1.965	-0.439	-1.276	0.616	-0.071	0.315	-0.615	0.152	-0.469	-1.726	0.863	0.301	-0.967	-0.827	-0.855	-0.498	0.826	-1.358	-2.024	0.124	1.14	-2.938	1.153
1.626	1.825	-0.278	-0.31	0.101	0.339	-1.38	-1.862	0.087	2.184	1.97	-0.729	1.002	1.597	0.176	3.071	1.359	-0.383	2.405	3.032	-0.601	2.014	1.683	-1.845	0.128	2.306	0.129	1.315	1.731	1.273	0.35	0.205	-0.049	-0.947	0	0.746	-1.279	-1.481	0.803	-1.844	0.407	0.165	-0.942	0.446	1.771	-0.438	-1.98	1.276	-1.451	-2.133
0.723	2.141	0.848	-0.021	-0.296	0.333	-0.743	-1.989	-1.118	0.518	2.81	1.036	0.854	1.379	0.629	0.301	2.944	2.087	-0.313	3.232	0.411	1.451	3.38	0.925	1.572	1.038	1.446	1.48	1.231	-0.253	-0.289	0.426	0.432	0.256	-1.016	0.198	-0.606	-2.09	-0.325	0.632	-1.332	1.251	1.116	-0.953	-0.467	0	-2.955	-0.025	-0.838	-1.861
-1.036	-0.84	-1.848	0.171	-0.233	0.026	0.918	0.973	1.859	-1.321	-0.346	-2.288	-0.727	-1.338	-1.294	-2.365	0.046	-2.015	-1.28	-0.829	-3.31	-0.603	0.521	-2.479	0.235	-1.754	-1.664	-1.461	-2.147	-1.142	-0.379	-0.771	0.096	0.731	0.3	-0.022	1.358	0.637	1.297	0.285	1.13	-0.477	1.539	0.072	-0.728	1.829	-0.28	1.745	0.46	1.272
-2.203	-0.578	0.955	-0.074	-0.402	-0.125	2.257	0.799	-0.849	-2.667	-0.001	0.988	-1.638	-1.172	0.876	-3.193	0.084	0.032	-2.311	1.021	1.166	-3.458	-0.3	1.685	-2.128	-2.074	0.59	-1.115	-1.414	1.869	-0.525	-1.039	-0.166	0.396	0.209	-0.079	1.744	0.163	-0.87	0.682	0.444	1.02	-0.149	1.183	-0.319	2.346	-0.638	-0.395	2.645	1.399
-1.967	-1.102	1.225	-0.055	-0.016	-0.054	1.981	1.124	-1.197	-2.631	-1.431	1.139	-1.238	-0.715	1.244	-2.799	-1.833	2.103	-2.673	-2.081	0.288	-3.481	-0.646	1.079	-0.515	-1.601	1.277	-1.148	-0.039	2.157	-0.798	-0.113	-0.07	0.681	0.081	-0.034	1.196	0.954	-1.191	1.142	-0.932	0.122	0.893	0.689	0.919	0.852	0.466	-2.098	2.686	1.244
-1.861	0.174	1.256	0.382	0.574	0.453	1.581	-0.707	-1.529	-2.444	0.578	1.046	-1.166	-0.229	1.474	-2.549	1.553	1.607	-3.351	-0.047	1.099	-2.432	1.022	0.05	-1.037	-1.133	0.865	-1.276	-0.534	2.575	0.123	0.515	1.201	0.6	0.535	-0.311	1.301	-0.803	-0.805	1.284	1.362	-0.464	-0.317	0.588	-0.983	2.075	-1.091	-0.02	1.82	-0.542
1.355	0.507	2.142	-0.178	-0.014	0.078	-1.214	-0.459	-2.194	1.903	0.215	2.558	0.737	0.773	1.637	2.499	0.933	3.117	2.643	-0.36	2.038	1.543	-0.51	3.315	1.036	1.663	1.004	-0.123	1.102	2.282	0.252	-0.323	0.679	-0.584	0.312	-0.521	-0.809	-0.746	-1.554	0.087	1.126	-0.934	-1.583	0.67	-0.128	0.132	-1.245	-1.89	-1.579	-0.141
-1.505	0.454	1.362	0.933	0.52	0.401	0.82	-0.85	-1.74	-1.895	0.794	1.851	-1.005	0.148	0.843	-2.898	0.164	1.824	-2.146	1.885	1.61	-1.381	0.668	2.845	-1.565	0.072	-0.185	-0.86	-0.906	1.066	0.318	0.865	0.762	1.47	0.126	-0.031	1.192	-0.167	-1.559	1.399	-0.897	0.394	2.542	0.522	0.142	0.689	0.756	-1.966	0.488	-1.486
-0.055	-2.422	0.17	-0.818	0.113	-0.49	0.709	2.31	0.276	-0.232	-3.125	0.162	0.059	-1.63	0.14	-1.206	-3.313	0.591	0.611	-3.561	0.808	-0.278	-3.472	-0.896	1.05	-1.536	-0.404	0.289	-1.272	1.199	-1.003	-0.607	-0.291	-0.517	0.823	-0.607	0.387	1.577	0.485	-1.469	1.425	-0.776	0.04	0.781	-1.597	-0.154	1.794	1.42	0.946	2.955
-2.331	-0.394	-1.04	0.097	0.168	-0.077	2.338	0.209	1.062	-2.987	-0.603	-0.9	-1.561	-0.157	-1.116	-3.581	-0.601	-1.777	-3.53	0.049	-0.221	-3.122	-1.675	-0.474	-1.681	0.84	-1.675	-1.098	-0.897	-1.812	-0.648	0.035	0.13	0.859	0.262	-0.305	1.872	-0.318	0.666	0.953	1.338	-0.154	1.003	-0.152	-1.337	1.36	-0.962	1.448	2.729	0.722
0.042	-1.213	2.074	-0.189	-0.06	0.016	0.07	1.231	-2.096	-0.168	-0.906	2.679	0.212	-1.5	1.348	0.234	-1.595	3.498	-1.277	-0.85	2.876	0.309	0.065	2.884	0.141	-2.613	1.252	1.284	-1.308	1.303	-0.359	-0.808	0.132	-0.004	0.677	-0.094	-0.418	1.363	-1.472	1.119	0.746	-0.189	-0.255	1.416	0.725	-1.47	1.086	-1.761	0.55	1.067
-1.552	-1.896	0.951	0.023	0.044	0.119	1.591	1.87	-1.047	-1.84	-2.198	1.537	-1.176	-1.507	0.347	-1.916	-1.578	2.464	-1.363	-3.172	1.858	-2.843	-2.487	1.16	-2.042	-1.065	-0.153	-0.649	-2.23	-0.361	-0.312	-0.3	0.746	0.374	0.387	-0.52	1.391	1.538	-0.343	-0.462	0.822	-1.084	0.838	-0.519	-1.057	0.938	2.262	0.406	1.724	2.121
0.211	0.149	2.6	-0.046	0.004	0.004	-0.187	-0.18	-2.583	-0.04	-0.02	3.234	0.447	0.298	1.867	-0.722	-0.924	3.144	-0.736	0.797	3.599	0.715	-0.062	4.054	1.413	-0.217	1.657	0.556	1.386	1.725	-0.412	-0.099	0.672	0.307	0.088	-0.662	-0.534	-0.32	-1.877	1.362	-0.286	-0.709	0.617	1.113	-0.719	-0.834	-1.398	-1.789	0.177	-0.02
-0.088	-2.002	-1.135	-0.306	0.616	-0.708	0.267	1.563	1.766	-0.165	-2.572	-1.578	-0.039	-1.308	-0.698	-1.295	-2.766	-1.777	0.238	-3.447	-1.033	0.378	-2.479	-2.509	1.051	-1.256	-0.596	-0.461	-1.546	0.3	-0.65	0.043	-1.06	0.046	1.134	-0.238	-0.303	1.239	1.286	-0.24	2.059	-0.76	1.085	0.842	-0.459	-1.22	1.812	1.235	0.806	1.874
1.931	0.039	-0.963	-0.373	-0.923	-0.087	-1.598	0.639	1.185	2.201	0.309	-1.588	1.569	-0.272	-0.31	2.088	1.408	-1.544	1.586	-0.064	-2.477	3.328	0.085	-1.668	1.628	0.511	0.503	2.108	-1.238	0.029	0.108	-0.609	-0.639	-0.782	-1.156	0.552	-1.209	-0.007	1.491	-0.266	-1.976	1.136	-1.758	-1.556	0.104	-1.825	-0.412	2.237	-1.96	1.175
0.954	0.759	-2.157	0.097	-0.42	0.054	-1.044	-0.488	2.078	1.209	1.395	-2.449	0.649	0.102	-1.798	1.968	1.16	-3.147	1.72	1.851	-1.569	0.405	2.091	-2.756	1.459	-0.698	-1.836	-0.204	-0.348	-2.274	0.147	0.214	-0.362	0.041	-1.054	0.467	-0.419	-0.985	1.899	1.04	-1.58	0.342	-0.711	-1.679	-0.081	-0.455	-1.974	2.369	-1.619	-0.027
-1.083	1.542	1.367	-0.337	0.182	-0.362	1.261	-1.698	-1.15	-0.83	1.45	2.051	-1.341	1.571	0.575	-1.24	2.201	2.699	0.297	1.48	2.126	-1.187	0.483	2.525	-0.792	2.478	0.157	-2.44	1.809	0.628	-1.085	0.347	-0.274	0.402	-0.007	-0.422	0.532	-1.504	-0.863	0.951	0.174	0.507	0.921	0.789	-1.063	0.374	-2.014	0.043	1.931	-1.808
-0.661	-0.961	-2.049	-0.182	-0.527	0.179	0.765	1.243	1.892	-0.443	-0.457	-2.528	-0.859	-1.503	-1.472	-0.912	-0.626	-3.524	0.674	-0.336	-2.487	-0.814	0.517	-2.127	-0.56	-2.499	-1.936	-1.92	-1.409	-1.347	-0.127	-1.241	-0.161	-0.222	0.196	0.489	0.758	0.48	1.599	-1.236	0.264	0.934	-0.107	0.967	-0.262	0.754	-0.195	2.422	0.705	1.927
-1.08	-0.837	-1.94	0.409	-0.181	-0.219	0.833	0.924	2.098	-1.821	-0.838	-1.826	-0.25	-0.844	-1.972	-2.242	0.107	-1.429	-2.178	-1.725	-1.246	-2.263	-0.891	-2.874	0.039	0.065	-2.508	0.184	-1.656	-2.615	0.512	-0.828	-0.634	0.297	0.448	0.194	0.904	0.296	1.6	-0.819	0.749	0.185	0.735	1.312	-0.315	0.375	-0.558	2.032	0.749	1.534
1.558	-2.018	-0.501	-0.027	-0.031	-0.028	-1.506	1.996	0.549	1.992	-2.481	-0.159	1.061	-1.473	-0.794	1.485	-3.034	0.637	2.884	-1.991	0.15	2.278	-3.208	-0.995	0.273	-2.01	-1.386	1.603	-0.842	-1.503	0.427	-0.568	0.262	-0.476	0.5	-0.321	-1.035	1.418	0.817	-1.342	0.062	-0.795	0.133	1.124	-1.036	-1.584	0.847	1.601	-1.903	2.463
0.392	1.559	-1.855	-0.258	0.206	0.257	-0.217	-1.637	1.733	0.853	1.616	-2.435	-0.085	1.444	-1.187	1.882	1.371	-2.222	0.808	2.494	-3.018	0.466	0.866	-3.173	-1.092	1.407	-1.473	0.077	2.354	-0.443	0.23	0.257	-0.348	-0.736	0.164	0.877	-0.354	-0.865	1.945	-1.77	-0.041	0.569	-0.73	1.187	1.36	0.559	-0.506	2.551	-0.103	-2.297
-0.106	1.779	1.658	0.483	-0.226	0.008	-0.203	-1.694	-1.653	-0.56	2.333	1.752	0.362	1.145	1.479	-1.555	1.959	1.956	-0.537	3.191	0.929	-0.228	2.735	2.681	0.163	0.491	2.368	1.479	1.457	1.368	-0.014	0.329	0.205	0.962	-0.81	-0.161	0.157	-1.897	-0.979	1.378	-1.226	0.809	1.793	-0.358	-0.775	0.854	-2.778	-1.095	-0.491	-1.453
-1.036	0.171	-1.921	0.035	-0.382	-0.093	1.039	0.008	1.925	-1.127	0.886	-2.059	-0.922	-0.606	-1.699	-1.863	1.447	-1.429	-1.512	0.938	-3.119	-0.108	1.36	-2.031	-0.049	-1.068	-2.228	-1.928	-1.082	-1.809	-0.647	-0.686	-0.221	0.722	-0.104	0.022	1.316	-0.465	1.323	0.673	1.02	-0.055	1.419	-0.454	-0.728	1.198	-1.559	1.602	0.756	0.472
-2.258	0.376	0.48	-0.192	-0.018	-0.466	2.371	-0.34	-0.146	-2.304	0.721	1.139	-2.127	0.003	-0.262	-2.109	1.828	0.976	-1.674	0.311	1.905	-3.35	0.756	1.503	-3.023	0.392	-0.914	-2.14	-1.071	-0.066	-0.718	0.38	-0.832	0.328	-0.382	-0.069	1.755	0.138	-0.332	0.465	-1.337	-0.623	0.096	-0.725	0.983	1.788	0.267	-1.399	2.875	-0.81
-0.163	-0.296	2.54	-0.183	-0.108	-0.003	0.282	0.343	-2.529	-0.365	0.046	3.134	0.037	-0.614	1.847	-0.187	-0.576	4.057	-1.463	0.263	3.131	0.187	0.944	2.996	-0.459	-1.64	1.903	1.13	-0.766	1.791	-0.419	0.216	0.65	0.071	-0.429	-0.651	-0.248	0.454	-1.904	-0.566	-1.333	-0.764	1.113	-0.752	-0.666	-1.247	0.521	-2.229	0.772	0.174
-0.657	-1.843	0.839	-0.209	0.536	0.786	0.859	1.349	-1.429	-1.303	-2.125	0.611	0.023	-1.45	1.099	-2.132	-1.897	1.325	-1.137	-3.208	0.51	-1.635	-1.763	-0.418	0.882	-1.686	0.375	0.343	-1.989	2.016	0.007	0.055	1.363	-0.37	0.923	0.136	0.659	0.694	-1.042	-0.508	1.929	0.378	-1.328	0.577	-0.188	1.641	0.299	-0.599	0.987	1.964
1.471	0.988	1.952	0.091	0.051	-0.121	-1.502	-1.024	-1.848	2.019	0.831	2.421	0.881	1.086	1.403	2.192	1.796	3.079	2.949	0.636	1.905	1.682	-0.093	3.015	1.144	2.03	0.804	-0.119	1.272	1.905	0.58	-0.104	0.479	-0.393	0.211	-0.709	-0.943	-1.062	-1.261	0.061	0.749	-1.541	-1.335	0.762	-0.255	-0.102	-1.688	-1.751	-1.994	-0.929
-1.456	1.267	0.866	0.75	-0.209	0.652	0.942	-1.174	-1.417	-1.701	1.948	0.813	-1.097	0.534	0.895	-2.705	1.918	1.041	-1.607	2.409	-0.25	-1.405	2.606	1.69	-1.613	-0.15	0.215	-1.319	0.169	1.925	0.429	0.49	0.664	1.021	-0.921	0.551	1.459	-1.273	-0.817	0.156	-1.542	0.952	1.916	-1.156	1.213	2.304	-0.607	-1.118	0.442	-1.064
-0.645	-1.899	1.407	-0.147	-0.378	-0.814	0.76	2.231	-0.722	-0.977	-2.528	1.634	-0.315	-1.218	1.065	-2.041	-2.582	1.599	-0.741	-2.474	2.692	-0.581	-3.481	1.197	0.803	-1.24	1.224	-0.649	-0.347	1.682	-0.606	-0.855	-0.417	0.321	0.162	-1.078	0.282	1.621	-0.435	0.04	0.376	-2.146	1.371	-0.244	-1.143	-0.799	1.875	-0.422	1.224	2.731
-2.058	-1.546	-0.695	0.171	-0.031	-0.185	1.891	1.573	0.815	-2.476	-2.116	-0.479	-1.543	-0.937	-0.874	-3.277	-2.309	-1.241	-2.983	-1.838	0.506	-1.882	-2.972	-0.343	-2.261	-0.076	-0.871	-1.055	-1.009	-1.956	-0.253	-0.638	-0.041	0.573	0.586	-0.315	1.49	0.871	0.812	-0.084	1.485	-0.551	1.217	0.452	-1.223	1.007	0.933	1.827	2.202	2.225
-0.288	-1.282	1.879	0.149	-0.182	-0.082	0.195	1.368	-1.846	-0.78	-1.789	1.889	0.25	-0.723	1.777	-0.735	-2.151	2.955	-0.623	-2.605	1.139	-1.802	-1.354	1.751	1.191	-1.094	2.245	-0.004	0.177	2.404	0.774	-0.399	0.341	-0.466	0.023	-0.506	-0.24	0.69	-1.848	-0.97	0.822	0.113	-1.269	-0.732	-0.589	0.254	-0.032	-2.546	0.599	1.962
-0.689	-2.128	-1.358	-0.035	0.129	-0.118	0.668	2.059	1.445	-0.506	-2.822	-1.484	-0.842	-1.337	-1.186	-0.061	-3.248	-0.512	0.374	-2.83	-2.178	-1.286	-3.447	-1.93	-1.745	-1.401	-0.526	-1.085	-0.864	-2.189	0.211	-0.495	-0.46	-0.284	0.755	0.238	0.85	1.434	1.04	-1.037	0.438	0.929	-0.784	1.484	-0.412	1.315	0.661	1.645	0.427	2.613
-0.199	0.553	2.541	-0.178	-0.127	0.025	0.329	-0.493	-2.547	-0.322	1.099	3.013	-0.095	-0.002	1.95	0.375	1.907	2.769	-0.003	0.706	4.032	-1.333	1.41	3.052	-0.772	-0.848	2.198	0.956	-0.29	2.075	-0.433	0.405	0.495	0.091	-0.652	-0.448	0.199	-0.043	-1.869	-0.631	-1.56	-0.403	1.114	-1.137	-0.138	-0.72	0.568	-2.06	0.447	-0.971
-1.106	-1.469	-1.414	0.78	-0.133	-0.275	0.417	1.6	1.692	-1.321	-1.735	-2.07	-0.811	-1.119	-0.724	-1.615	-2.772	-1.807	-0.549	-1.855	-2.923	-2.246	-1.222	-2.479	-0.513	-1.94	-0.016	-1.574	-0.562	-0.24	0.449	-0.338	-0.954	0.993	0.092	0.456	0.074	1.132	1.155	1.975	0.508	0.32	1.146	-0.762	1.116	-0.194	1.726	0.249	0.783	1.976
0.707	-2.075	0.103	0.263	0.388	-0.919	-1.026	1.713	0.591	1.165	-2.429	0.524	0.245	-1.619	-0.368	1.445	-1.883	1.454	2.137	-2.641	0.079	0.718	-3.453	0.678	-0.636	-1.497	0.227	-0.076	-2.127	-1.34	0.744	-0.206	-0.661	-0.311	0.923	-1.084	-1.326	1.297	-0.032	-0.851	0.531	-2.01	0.175	1.898	-1.347	-2.051	2.043	-0.52	-0.689	2.065
0.609	2.32	-0.166	-0.396	-0.038	-0.103	-0.392	-2.334	0.227	1.268	2.703	-0.374	-0.077	1.823	0.049	1.02	3.809	-0.237	1.645	2.415	-1.371	2.046	2.532	0.338	-0.798	2.258	-0.74	-0.538	1.942	1.099	0.253	0.365	-0.203	-1.054	-0.452	-0.006	-0.95	-1.959	-0.197	-1.759	-0.065	-0.781	-1.361	-0.192	1.021	-1.937	-2.362	0.125	0.125	-2.613
-0.016	1.755	1.518	-0.301	0.317	-0.223	0.214	-1.93	-1.447	0.025	1.459	2.168	-0.088	1.997	0.747	0.296	2.326	2.896	0.799	0.661	2.232	-0.902	1.139	2.641	0.885	2.364	0.364	-0.774	2.92	0.886	-0.653	0.999	-0.274	0.055	-0.345	-0.181	-0.115	-1.193	-1.486	-0.252	-1.03	0.628	1.208	-0.096	-0.052	-1.286	-1.236	-1.609	0.532	-2.572
0.335	-2.113	-0.887	-0.363	-0.253	0.317	-0.154	2.291	0.679	0.993	-2.147	-1.24	-0.367	-2.018	-0.45	0.882	-3.035	-1.932	1.86	-2.237	-0.485	1.269	-1.227	-1.889	-0.577	-3.043	0.024	-1.24	-1.773	-1.159	-0.375	-0.924	0.655	-0.363	0.421	-0.018	-0.518	1.639	0.948	-1.017	0.483	-0.982	0.671	0.451	-0.408	-1.579	1.719	1.241	0.181	2.851
-1.585	0.598	-1.699	0.203	-0.09	-0.361	1.443	-0.54	1.882	-2.271	0.444	-1.551	-0.794	0.708	-1.833	-2.487	0.649	-0.446	-2.437	-0.629	-1.813	-3.03	1.088	-1.968	-0.521	1.777	-1.49	-0.691	0.635	-2.944	0.168	-0.26	-1.119	0.228	0.083	0.398	1.242	-0.755	1.116	-0.811	-0.125	0.83	0.526	1.193	0.539	0.959	-1.813	1.173	1.569	-0.296
1.503	-1.767	-1.145	-0.041	-0.069	-0.011	-1.421	1.772	1.172	2.107	-2.15	-1.022	0.853	-1.313	-1.199	1.884	-3.004	-0.357	2.942	-1.519	-0.657	2.434	-2.554	-2.049	-0.013	-2.037	-1.414	0.813	-0.579	-2.063	0.576	-0.475	0.024	-0.652	0.322	-0.04	-0.881	1.161	1.242	-1.52	-0.391	-0.268	-0.558	1.034	-0.927	-1.253	0.416	1.989	-1.892	2.291
1.42	1.093	-1.683	-0.362	0.247	0.009	-1.164	-1.277	1.687	2.096	1.366	-1.739	0.686	0.781	-1.544	2.041	2.46	-1.643	2.493	1.194	-2.76	2.744	1.066	-0.943	0.611	-0.17	-2.046	-0.102	1.394	-2.028	0.367	0.509	-0.092	-1.092	-0.032	0.113	-1.391	-0.496	1.557	-1.309	-0.852	-0.59	-1.778	0.867	-0.154	-0.976	0.182	2.378	-0.914	-1.983
0.997	0.539	2.151	0.366	-0.032	-0.31	-1.181	-0.535	-1.936	0.682	0.724	2.766	1.288	0.342	1.433	-0.049	-0.141	3.015	0.075	1.625	2.739	1.41	0.814	3.548	1.872	-0.57	1.636	1.958	1.113	1.044	0.219	-0.139	0.464	0.529	0.049	-1.068	-0.417	-0.746	-1.916	1.516	-0.311	-1.155	0.581	1.103	-1.427	-0.133	-0.676	-2.958	-1.854	-0.3
-1.892	-0.051	-1.126	-0.153	0.483	0.269	1.956	-0.24	0.985	-1.949	-0.727	-1.415	-1.768	0.675	-0.789	-1.323	-0.898	-2.267	-3.008	-0.823	-1.685	-1.613	-1.516	-0.741	-2.454	0.912	0.043	-1.845	1.475	-1.548	-0.275	0.825	-0.403	-0.033	0.137	0.953	1.445	0.19	1.429	-0.125	-0.972	0.689	-0.75	0.501	1.709	1.753	1.261	1.582	2.362	-0.636
-1.895	-1.557	-0.409	-0.087	-0.182	0.259	1.935	1.646	0.23	-1.947	-1.926	-1.039	-1.764	-1.16	0.284	-1.043	-2.54	-1.301	-2.038	-1.099	-1.855	-2.804	-2.571	-1.057	-2.219	-1.713	1.08	-2.315	-0.187	0.342	-0.333	-0.82	0.639	0.153	0.463	-0.113	1.413	1.032	0.55	-0.582	1.302	0	0.163	0.226	-1.186	1.1	1.563	1.495	2.361	2.184
-1.296	-0.75	2.123	-0.027	0.096	-0.014	1.328	0.699	-2.117	-1.241	-0.865	2.822	-1.291	-0.578	1.358	-2.19	-1.27	3.206	-0.827	-0.01	3.393	-0.492	-1.73	2.925	-2.136	0.119	1.15	-1.548	-1.524	0.726	-0.005	0.083	0.745	-0.044	0.112	-0.773	1.3	0.678	-1.303	-0.912	0.75	-1.123	-0.153	-0.94	-1.138	1.479	1.684	-0.779	1.297	0.681
-1.197	-1.294	1.074	0.597	0.329	0.772	0.716	0.942	-1.76	-1.877	-1.107	1.132	-0.408	-1.425	1.007	-2.138	-0.709	2.11	-2.646	-1.928	0.903	-2.068	-0.349	0.364	-0.113	-2.024	0.198	-0.307	-2.116	1.89	0.582	-0.281	1.268	0.543	0.843	0.178	0.67	0.336	-1.228	1.489	1.435	0.471	-0.297	1.62	0.303	1.619	-0.222	-1.196	0.744	1.542
2.03	-0.316	1.708	0.115	0.004	-0.125	-2.059	0.328	-1.637	2.341	-0.803	2.161	1.647	0.167	1.174	3.083	-0.256	2.833	2.769	-1.58	1.534	1.66	-1.279	2.868	2.371	0.657	0.494	1.13	0.919	1.779	0.542	-0.526	0.309	-0.304	0.529	-0.562	-1.45	-0.11	-1.297	0.369	1.197	-1.176	-0.792	1.264	0.115	-1.034	-0.774	-2.025	-2.56	0.784
-0.977	1.876	1.27	0.512	0.201	0.024	0.604	-2.044	-1.255	-1.398	2.461	1.162	-0.495	1.234	1.33	-2.192	2.109	0.354	-0.788	3.315	0.834	-1.818	2.763	2.085	-1.112	0.308	1.567	0.294	1.56	2.098	0.147	0.885	-0.045	0.854	-0.51	0.09	0.882	-1.298	-1.193	0.254	-0.982	0.855	1.883	-0.314	0.476	0.414	-0.689	-1.946	0.332	-2.702
-1.065	-1.297	1.581	0.131	-0.642	-0.637	0.941	1.823	-1.015	-1.644	-1.653	1.757	-0.457	-0.927	1.303	-2.58	-1.232	1.362	-1.619	-1.587	2.86	-1.489	-2.719	1.574	0.533	-1.292	1.744	-0.53	0.162	1.578	-0.43	-0.977	-0.26	0.689	-0.212	-0.91	0.529	1.284	-0.579	0.725	-0.516	-2.037	1.595	-0.604	-0.497	-0.563	1.577	-0.575	1.321	2.236
-1.435	-2.2	0.153	-0.061	0.082	0.212	1.49	2.139	-0.276	-1.355	-2.919	0.259	-1.447	-1.392	0.069	-2.222	-3.486	-0.226	-1.521	-3.163	1.338	-0.46	-3.34	-0.115	-2.316	-0.898	0.54	-1.485	-1.189	-1.019	-0.083	-0.646	0.479	-0.035	0.801	-0.045	1.357	1.412	0.096	-0.84	1.475	0.348	-0.274	0.678	-1.145	1.679	1.58	1.104	1.55	2.791
-1.103	-0.699	1.914	0.266	-0.038	0.12	0.905	0.76	-2.01	-1.125	-1.435	2.096	-0.998	0.12	1.677	-2.005	-1.671	2.711	-0.227	-1.815	2.593	-1.394	-2.062	1.203	-0.914	0.682	2.583	-1.969	0.368	1.126	0.215	0.407	0.725	0.296	-0.478	-0.5	1.147	0.083	-1.628	-0.602	-0.568	-1.053	0.621	-1.48	-0.152	2.128	0.294	-1.208	0.619	1.367
-0.203	-1.853	-1.726	0.017	0.145	-0.059	0.164	1.813	1.777	0.013	-2.529	-1.773	-0.402	-1.085	-1.595	-0.452	-3.203	-1.052	1.054	-2.763	-1.734	-0.253	-2.894	-2.816	-1.452	-1.038	-1.594	-0.109	-0.459	-2.427	0.112	-0.623	-0.188	-0.098	0.913	0.073	0.016	1.121	1.531	-1.12	1.198	-0.269	0.674	1.406	-0.531	-0.969	0.719	1.964	0.3	2.468
-0.189	0.162	2.254	-0.665	0.72	-0.217	0.722	-0.776	-2.052	-0.176	0.473	2.888	-0.239	-0.102	1.536	0.457	1.327	2.852	0.434	-0.323	3.484	-1.21	0.71	3.317	-0.947	-0.954	1.381	0.76	-0.505	1.228	-0.602	0.946	0.517	-0.647	0.382	-0.933	0.66	-0.44	-1.321	-0.747	1.347	-1.516	-1.47	-0.354	-0.972	1.581	0.225	-1.222	0.717	-1.047
-0.896	-0.807	-2.081	0.346	0.862	-0.283	0.624	0.073	2.286	-1.279	-0.881	-2.671	-0.473	-0.644	-1.441	-1.253	-1.95	-2.884	-0.852	-0.314	-3.552	-2.341	-0.676	-2.353	0.501	-1.066	-1.6	-1.026	-1.091	-0.604	-0.152	0.759	-0.84	0.807	0.839	0.329	0.262	0.069	1.563	0.845	1.966	0.595	1.816	0.404	0.094	-0.809	0.411	1.809	0.998	0.119
0.047	-1.676	1.489	0.726	-0.113	-0.645	-0.735	1.687	-1.018	0.268	-1.964	2.106	-0.134	-1.324	0.795	0.395	-1.212	2.954	1.224	-2.499	2.058	-0.456	-2.681	2.396	-1.039	-0.593	0.855	-0.349	-2.163	0.121	0.89	-0.39	0.05	0.428	0.14	-1.299	-0.808	0.973	-1.391	0.442	-0.705	-2.064	1.169	0.863	-1.692	-1.074	1.224	-2.449	-0.609	2.305
0.838	2.132	-0.739	-0.186	-0.322	-0.338	-0.637	-1.936	0.959	1.068	2.729	-0.404	0.569	1.437	-1.024	1.399	3.313	-1.268	1.89	2.628	0.263	0.326	3.364	0.052	1.361	1.015	-1.643	-0.314	1.511	-1.687	0.03	0.318	0.001	-0.364	-0.972	-0.679	-0.334	-2.162	0.261	0.21	-1.219	-1.589	-1.38	-0.803	-1.09	-0.973	-2.955	-0.244	-0.911	-1.653
-0.186	1.609	1.481	0.023	0.55	-0.557	0.096	-2.027	-1.111	-0.268	1.182	2.09	-0.121	2.008	0.766	-0.207	1.954	2.815	0.577	0.481	2.229	-1.225	0.622	2.126	0.906	2.449	0.683	-0.78	2.874	0.816	-0.41	1.193	-0.497	0.433	-0.112	-0.595	-0.317	-1.323	-1.129	0.661	-0.355	0.415	1.387	0.106	-1.068	-1.188	-1.35	-0.49	0.504	-2.65
0.412	-2.205	-0.638	0.301	-0.113	0.344	-0.603	2.283	0.442	0.236	-2.273	-1.343	0.604	-2.047	0.145	0.295	-3.413	-1.589	0.975	-1.777	-2.015	-0.732	-1.802	-1.623	1.491	-2.587	0.289	-0.153	-2.525	0.824	0.899	-0.606	0.447	-0.301	0.382	0.229	0	1.787	0.661	-1.027	-0.069	0.91	-0.635	0.276	-0.778	0.122	1.786	1.777	-1.175	2.675
-2.429	-0.203	-0.413	-0.069	-0.251	0.339	2.464	0.341	0.2	-2.854	0.323	-0.657	-1.91	-0.74	-0.103	-2.426	0.892	-1.575	-3.084	1.215	-0.028	-3.807	-0.142	-1.047	-1.517	-1.442	-0.845	-2.432	-1.401	0.625	-0.757	-0.075	0.653	0.616	-0.432	0.018	1.74	0.462	0.505	0.461	-0.261	-1.052	0.829	-1.46	0.282	1.46	1.459	0.28	3.082	0.185
1.976	-1.677	-0.392	-0.056	-0.055	-0.007	-1.896	1.718	0.429	2.613	-1.851	-0.143	1.258	-1.429	-0.596	2.596	-2.347	0.837	3.255	-0.949	-0.109	3.074	-2.594	-0.864	0.574	-2.278	-0.694	1.355	-1.092	-1.683	0.653	-0.325	0.226	-0.747	0.224	-0.251	-1.165	1.464	0.609	-1.549	-0.577	-0.066	-0.666	0.452	-1.351	-1.092	1.339	1.666	-2.544	1.884
1.525	0.839	-1.786	-0.256	-0.28	-0.188	-1.409	-0.628	1.909	2.056	1.366	-1.833	0.922	0.28	-1.662	1.672	2.261	-1.318	2.356	1.673	-2.934	2.956	0.986	-1.336	1.455	-0.744	-1.908	0.057	0.402	-2.365	0.386	0.163	-0.224	-0.911	-0.71	-0.136	-1.691	-0.406	1.169	-0.664	-1.755	-0.502	-1.564	-0.382	-0.946	-1.77	0.67	1.204	-1.107	-0.85
-0.519	0.229	2.555	0.17	-0.159	0.015	0.429	-0.181	-2.5	-1.088	0.38	2.984	0.056	0.054	2.029	-1.815	-0.304	2.89	-1.572	1.378	2.7	-0.706	0.444	4.046	0.549	-0.917	2.2	0.868	0.821	2.095	-0.389	-0.06	0.503	0.723	-0.27	-0.458	0.248	-0.645	-1.88	1.317	-1.1	-0.085	1.436	0.601	-0.466	0.41	-1.658	-2.182	0.646	0.262
-1.535	-0.488	-1.663	-0.138	0.135	0.067	1.582	0.437	1.639	-1.672	-1.199	-1.712	-1.312	0.271	-1.56	-2.085	-1.337	-2.671	-2.528	-1.433	-1.004	-0.797	-1.827	-1.519	-2.268	0.77	-1.241	-1.014	0.821	-2.547	-0.149	0.541	-0.611	-0.148	-0.249	0.756	0.821	0.349	1.878	0.15	-1.263	0.553	-1.162	-0.32	1.086	0.434	1.277	2.229	2.233	0.495
-2.204	0.182	0.643	-0.159	-0.451	-0.046	2.294	0.112	-0.562	-2.465	0.767	0.328	-1.848	-0.461	0.94	-2.545	0.633	-0.72	-1.836	1.638	0.468	-3.477	0.992	0.813	-2.576	-1.322	0.805	-1.708	-0.33	2.075	-0.567	-0.986	0.28	0.245	0.099	-0.354	1.702	-0.44	-0.633	0.314	0.771	0.459	-0.13	0.585	-1.285	1.926	-1.387	-0.156	2.766	0.648
-1.94	0.064	1.683	-0.059	-0.005	-0.059	2.023	-0.08	-1.659	-2.329	-0.349	2.109	-1.467	0.464	1.172	-2.949	0.22	2.818	-1.791	-1.076	2.765	-3.032	-0.897	1.485	-0.858	1.169	1.881	-2.066	1.055	0.491	-0.471	-0.412	0.482	0.371	0.397	-0.586	1.587	-0.464	-1.097	0.737	1.341	-0.117	-0.288	0.693	-1.4	2.095	-0.614	-0.145	2.379	0.309
-1.663	-0.825	0.618	0.504	-0.127	0.964	1.278	0.877	-1.446	-2.177	-0.336	0.505	-1.036	-1.296	0.76	-2.425	0.188	1.424	-3.092	-1.009	0.3	-1.89	0.429	-0.261	-0.772	-1.907	-0.205	-1.483	-2.057	1.505	0.245	-0.761	1.307	0.711	0.448	0.485	0.988	0.247	-0.992	1.614	0.814	1.007	-0.058	1.239	0.588	1.691	-0.613	-1.065	1.537	1.509
1.846	-0.702	1.741	0	-0.106	0.047	-1.832	0.78	-1.72	2.295	-1.224	1.914	1.327	-0.155	1.502	2.915	-0.933	2.749	2.985	-1.459	1.017	1.881	-2.204	2.186	1.738	0.825	1.252	0.541	-0.053	2.285	0.575	-0.602	0.201	-0.573	0.381	-0.104	-1.395	0.15	-1.418	-0.184	1.392	-0.231	-1.275	0.537	0.686	-0.734	-0.19	-2.195	-2.193	1.386
0.201	2.513	0.662	0.044	-0.061	0.099	-0.235	-2.498	-0.736	-0.153	3.13	0.553	0.537	1.772	0.738	-1.195	3.079	0.813	-0.181	3.567	-0.52	0.403	3.826	1.25	0.592	1.66	1.867	1.584	1.918	0.275	-0.262	0.622	0.073	0.345	-0.741	0.12	-0.54	-1.746	-0.621	0.594	-1.075	1.141	1.344	-0.639	-0.345	-1.534	-1.907	-0.06	0.094	-3.151
-0.878	-1.992	0.975	-0.579	0.113	-0.656	1.422	1.901	-0.421	-1.343	-2.385	1.309	-0.419	-1.507	0.574	-1.861	-1.795	2.17	-0.848	-3.261	1.704	-2.157	-2.706	0.665	0.181	-2.041	-0.222	0.374	-1.242	1.351	-1.013	-0.349	-0.194	-0.048	0.547	-1.022	1.042	1.264	-0.138	-0.685	1.323	-1.515	0.465	-0.008	-1.844	0.543	1.422	0.814	1.743	2.479
-1.954	-1.841	0.139	0.077	-0.077	0.083	1.87	1.889	-0.173	-2.577	-2.053	0.492	-1.258	-1.558	-0.189	-3.073	-2.761	-0.162	-3.167	-1.149	0.695	-2.259	-2.568	1.459	-1.586	-1.119	-1.186	-0.55	-2.453	-0.396	-0.474	-0.394	0.496	0.627	0.23	-0.335	1.364	1.465	0.32	0.19	0.629	-1.242	1.386	-0.546	-0.689	0.637	2.283	0.637	2.293	2.241
-1.8	-0.302	1.509	-0.01	-0.128	-0.098	1.834	0.38	-1.505	-1.754	-0.511	2.203	-1.769	-0.068	0.723	-2.709	-0.914	2.521	-1.533	0.389	2.816	-1.022	-1.221	2.579	-2.48	0.801	0.714	-2.152	-0.863	0.024	-0.447	0.446	0.201	0.44	-0.698	-0.395	1.814	-0.213	-1.009	-0.123	-1.231	-1.234	0.475	-1.445	0.431	2.509	-0.022	-0.196	1.782	0.923
-0.966	-1.085	-2.166	0.002	-0.027	-0.035	0.928	1.099	2.189	-0.913	-1.664	-2.584	-0.974	-0.475	-1.65	-1.609	-2.467	-2.141	0.15	-2.044	-2.689	-1.394	-1.365	-3.498	-1.982	-0.341	-1.407	-0.528	0.414	-2.251	-0.037	-0.706	-0.443	0.01	0.646	0.382	0.861	0.453	1.727	-0.946	1.036	0.533	0.63	1.377	-0.121	0.3	-0.291	2.331	0.959	1.713
-0.213	-0.472	2.335	-0.444	0.634	-0.025	0.589	-0.113	-2.344	-0.053	-0.267	3.028	-0.378	-0.63	1.533	0.998	0.179	3.105	-0.158	-1.127	3.626	-0.766	0.486	3.495	-1.403	-1.01	1.529	0.338	-1.463	1.229	-0.278	0.63	0.722	-0.552	0.533	-0.778	0.638	-0.134	-1.527	-0.757	1.519	-1.174	-1.448	-0.113	-0.866	1.508	0.559	-1.36	0.483	-0.06
-1.211	-0.274	-2.005	-0.16	0.851	0.187	1.322	-0.504	1.872	-1.823	-0.212	-2.454	-0.577	-0.288	-1.469	-1.743	-1.036	-3.21	-1.603	0.797	-2.93	-2.766	-0.258	-1.85	0.372	-0.101	-2.011	-0.577	-1.34	-1.05	-0.771	0.724	-0.29	0.464	0.837	0.652	0.631	-0.431	1.467	0.32	1.665	1.318	1.376	1.053	0.117	-0.274	-0.625	2.11	1.961	-0.513
0.808	-1.265	1.66	0.033	-0.482	-0.819	-0.949	1.651	-0.963	1.343	-1.581	2.021	0.257	-0.914	1.211	2.279	-0.918	1.92	1.569	-2.508	1.495	1.109	-1.82	3.072	-0.016	0.012	1.675	-0.702	-1.514	1.185	0.577	-0.612	-0.295	-0.587	-0.282	-1.246	-1.351	0.952	-0.872	-1.283	-1.186	-1.197	-0.18	-0.17	-2.294	-2.296	1.041	-1.507	-0.528	2.229
-0.19	2.064	-1.495	0.125	-0.345	-0.243	0.155	-1.83	1.657	-0.367	2.768	-1.404	0	1.259	-1.513	-0.091	3.325	-2.29	-0.008	3.306	-0.419	-1.456	2.882	-1.416	1.084	1.253	-1.905	-0.631	0.763	-2.323	-0.05	0.431	-0.227	0.308	-1.113	-0.258	0.744	-1.728	1.097	1.24	-1.224	-0.939	-0.521	-1.721	-0.59	1.103	-2.76	0.892	-0.408	-1.879
-1.146	1.629	1.385	0.243	0.339	-0.115	0.936	-1.883	-1.289	-1.845	1.522	1.526	-0.387	1.711	1.171	-1.978	2.055	2.516	-2.088	0.457	1.594	-2.559	1.939	0.775	0.308	1.243	1.881	-0.139	2.761	1.03	0.002	1.054	-0.19	0.455	-0.397	-0.045	0.411	-1.297	-1.252	-0.175	-0.815	0.808	1.528	-0.396	0.322	-0.683	-1.575	-1.405	1.425	-2.4
1.207	-1.999	-0.145	-0.027	-0.153	0.494	-1.14	2.073	-0.138	1.648	-2.008	-0.721	0.718	-1.918	0.498	1.93	-3.076	-0.803	2.5	-1.302	-0.551	1.213	-1.56	-1.694	1.22	-2.518	1.29	-0.258	-2.407	0.239	0.461	-0.487	0.999	-0.486	0.164	-0.003	-0.638	1.7	0.337	-1.48	-0.347	0.066	-0.23	0.198	-1.126	-0.911	1.739	1.425	-1.597	2.354
-1.142	-0.959	-1.856	-0.308	-0.27	0.202	1.319	1.138	1.726	-0.968	-0.551	-2.447	-1.312	-1.343	-1.163	0.001	-0.078	-2.283	-1.761	0.208	-2.565	-0.974	-1.327	-3.3	-0.699	-2.246	-1.102	-2.333	-1.642	-1.231	-1.052	-0.478	0.097	0.424	-0.053	0.302	0.577	0.958	1.47	0.916	0.381	-0.591	1.059	-0.966	0.431	0.084	1.901	1.123	2.012	1.251
2.33	-1.197	-0.47	-0.044	-0.146	0.059	-2.253	1.3	0.445	3.033	-1.173	-0.362	1.533	-1.158	-0.522	3.365	-1.097	0.703	3.511	-0.368	-0.999	3.497	-2.047	-0.803	1.1	-2.166	-0.294	1.292	-1.055	-1.632	0.732	-0.194	0.188	-0.792	-0.089	-0.088	-1.421	1.282	0.401	-1.375	-0.88	0.452	-1.149	-0.319	-1.094	-1.034	1.608	1.397	-2.992	1.233
1.056	0.011	-2.316	-0.344	-0.004	-0.016	-0.859	0	2.364	1.626	0.36	-2.642	0.442	-0.314	-1.883	1.657	1.41	-2.547	1.575	0.153	-3.73	2.545	-0.123	-2.199	0.497	-1.432	-1.858	-0.481	-0.256	-2.516	0.279	0.207	-0.412	-0.965	-0.234	0.388	-1.237	0.381	1.772	-1.048	-1.353	0.351	-1.753	0.154	-0.181	-0.839	1.4	1.711	-0.503	-0.38
1.013	-0.188	2.334	-0.214	-0.051	0.121	-0.851	0.204	-2.391	1.126	0.189	2.938	0.853	-0.534	1.642	0.203	0.754	3.339	1.879	0.923	2.714	1.446	-0.596	3.629	0.323	-1.453	1.825	1.793	-0.927	1.197	-0.024	0.354	0.715	-0.387	-0.46	-0.472	-0.987	0.404	-1.631	-1.165	-1.183	-0.177	0.481	-0.919	-0.922	-2.176	0.452	-1.5	-0.698	-0.038
-1.349	-0.048	-1.787	-0.135	0.299	0.192	1.438	-0.117	1.684	-1.693	-0.702	-1.91	-0.93	0.641	-1.595	-2.314	-0.592	-2.741	-2.338	-1.001	-1.08	-0.925	-1.49	-2.124	-1.654	1.434	-1.305	-0.405	1.005	-2.515	0.16	0.539	-0.484	-0.412	0.053	0.875	0.702	0.147	1.915	-1.053	-0.87	0.811	-1.183	0.785	1.139	0.748	1.216	2.305	2.063	-0.351
-1.963	0.513	1.21	-0.285	-0.201	-0.201	2.132	-0.376	-1.113	-1.842	1.119	1.581	-2.036	-0.141	0.753	-1.757	2.046	0.974	-0.945	1.057	2.179	-2.692	1.24	2.324	-2.993	-0.132	0.126	-1.994	-1.076	1.455	-1.053	-0.213	-0.349	0.479	-0.17	-0.06	1.395	-0.15	-1.313	0.637	-1.112	0.521	0.826	0.597	0.64	0.987	-0.767	-2.163	2.777	-0.596
-2.155	-0.782	1.258	0.013	0.071	0.033	2.147	0.755	-1.266	-2.426	-1.416	1.515	-1.78	-0.118	0.935	-3.412	-1.27	1.957	-1.851	-1.919	2.261	-2.591	-2.078	0.64	-1.665	0.497	1.827	-2.492	0.496	0.393	-0.426	-0.499	0.324	0.438	0.639	-0.249	1.834	0.213	-0.716	0.679	1.475	0.458	-0.069	1.219	-1.05	2.669	0.113	0.003	2.372	1.289
-1.814	-0.751	-0.113	0.208	-0.411	0.972	1.619	1.011	-0.747	-2.227	-0.174	-0.202	-1.301	-1.341	0.025	-2.496	0.203	0.795	-3.117	-0.616	-0.635	-1.775	0.649	-0.746	-0.913	-1.677	-0.93	-1.96	-2.149	0.379	-0.181	-1.078	1.022	0.559	0.248	0.777	1.035	0.471	-0.656	1.513	0.323	1.416	-0.088	1.104	1.118	1.553	-0.484	-0.837	2.131	1.511
1.863	-0.467	1.788	0.024	-0.063	0	-1.865	0.504	-1.795	2.372	-0.913	2.018	1.288	-0.019	1.463	2.678	-0.422	2.979	3.21	-1.074	1.27	1.913	-1.95	2.322	1.763	0.983	1.281	0.544	0.117	2.233	0.691	-0.426	0.153	-0.644	0.318	-0.158	-1.141	0.183	-1.583	-0.368	1.4	-0.099	-1.484	0	0.564	-0.471	0.715	-2.203	-2.51	0.797
0.759	2.006	1.414	-0.057	-0.016	0.107	-0.736	-2.002	-1.505	0.688	2.706	1.418	0.746	1.221	1.36	-0.234	3.11	1.897	0.919	3.232	0.458	1.542	2.98	2.1	0.848	0.756	2.379	1.716	0.967	0.832	-0.343	0.616	0.479	0.23	-0.641	-0.277	-0.77	-1.245	-1.259	0.478	-1.488	0.491	1.209	-0.3	-0.832	-1.766	-1.213	-0.735	-0.634	-2.687
-0.049	-2.21	1.072	-0.429	-0.136	-0.592	0.44	2.375	-0.514	-0.388	-2.839	1.233	0.252	-1.492	0.845	-1.377	-2.87	1.731	0.315	-3.288	1.959	-0.387	-3.47	0.377	1.245	-1.682	0.346	0.422	-0.812	1.736	-0.668	-0.706	-0.143	-0.111	0.483	-0.93	0.072	1.734	-0.125	-0.861	0.635	-1.669	0.819	0.141	-1.423	-0.922	2.133	0.223	0.781	2.908
-1.394	-1.985	0.901	-0.148	0.072	-0.039	1.465	1.971	-0.876	-1.465	-2.391	1.519	-1.28	-1.462	0.253	-1.975	-3.337	1.209	-2.179	-1.868	2.217	-0.514	-2.687	2.002	-2.201	-1.262	-0.302	-0.617	-2.164	-0.275	-0.483	-0.211	0.566	0.194	0.359	-0.643	1.062	1.593	-0.258	-0.612	0.442	-1.403	0.915	-0.353	-1.153	0.495	2.388	0.171	1.782	2.259
-1.481	-0.507	1.737	-0.015	0.21	0.067	1.524	0.353	-1.764	-1.218	-0.767	2.379	-1.684	-0.2	1.006	-2.076	-0.997	2.994	-0.751	-0.003	2.972	-0.677	-1.666	2.204	-2.501	0.5	1.251	-2.112	-0.927	0.325	-0.67	0.551	0.135	0.636	-0.138	-0.01	1.599	0.488	-0.958	0.375	-1.178	-0.232	1.117	-0.162	0.947	1.598	1.615	-0.913	1.412	0.194
0.064	-0.444	-2.572	0.039	-0.035	-0.076	-0.046	0.469	2.614	0.169	-0.974	-3.057	-0.012	0.089	-1.988	-0.612	-1.72	-2.771	1.132	-1.481	-3.076	0.11	-0.436	-4.066	-1.071	0.333	-1.949	0.428	1.066	-2.191	0.334	-0.447	-0.663	-0.239	0.382	0.516	0.149	-0.026	1.963	-1.389	0.178	0.521	-0.151	1.508	0.332	-0.35	-0.969	2.234	-0.253	0.955
-0.465	0.484	2.299	-0.77	-0.176	-0.29	1.16	-0.348	-2.022	-0.782	0.882	2.831	-0.177	0.066	1.665	-1.152	1.935	2.422	0.036	1.05	3.473	-1.563	0.368	3.412	-0.162	-1.048	1.848	0.869	0.367	1.551	-0.972	0.226	0.316	-0.44	-0.565	-0.85	0.902	-0.037	-1.332	-1.159	-0.511	-1.712	-0.425	-1.6	-0.555	0.849	1.059	-1.48	1.343	-0.662
0.096	2.189	-1.079	-0.06	0.233	0.759	-0.014	-2.383	0.422	-0.23	2.771	-1.325	0.395	1.526	-0.746	0.422	3.069	-2.209	-0.209	3.636	-0.613	-1.291	2.677	-1.707	1.367	1.802	-0.354	0.527	0.74	-1.551	-0.341	0.893	0.444	0.254	-0.454	0.969	-0.231	-1.669	0.1	-0.197	-0.66	2.044	1.386	-0.39	0.914	-1.307	-1.656	0.051	0.218	-2.986
1.03	-0.585	1.829	0.488	-0.322	-0.671	-1.536	0.812	-1.278	1.564	-0.46	2.269	0.47	-0.677	1.281	1.856	0.577	2.383	2.456	-0.936	1.844	1.406	-0.913	3.296	-0.517	-0.268	1.7	0.276	-1.764	1.214	0.872	-0.091	-0.057	-0.022	-0.552	-1.21	-1.412	0.035	-1.255	-0.017	-1.652	-1.408	0.56	-0.187	-2.095	-1.857	-0.408	-2.191	-1.563	1.526
0.834	2.123	-0.903	0.296	-0.163	0.344	-1.009	-2.011	0.708	0.584	2.698	-1.217	1.037	1.452	-0.541	1.367	3.451	-1.413	-0.247	3.154	-0.569	0.106	2.491	-2.225	1.838	1.822	0.246	1.664	0.857	-1.14	-0.011	0.456	0.039	0.619	-0.779	0.657	-0.433	-1.775	1.224	1.345	-0.427	1.368	1.031	-1.394	-0.198	0.057	-2.691	1.524	-1.503	-2.172
-1.016	1.128	1.734	0.211	0.463	0.001	0.905	-1.432	-1.721	-1.605	0.759	1.878	-0.363	1.481	1.504	-1.971	1.246	2.829	-1.362	-0.325	2.095	-2.351	0.92	1.079	0.442	1.379	2.183	-0.598	2.616	1.517	0.181	1.195	0.151	0.268	-0.272	-0.151	0.811	-0.674	-1.505	-0.777	-0.693	-0.097	0.749	-0.787	0.631	0.168	-0.254	-2.356	0.953	-2.11
1.25	-2	-0.347	0.048	-0.104	0.692	-1.284	2.081	-0.124	1.413	-2.094	-1.061	1.04	-1.821	0.438	1.625	-3.125	-1.282	2.352	-1.529	-1.163	0.669	-1.711	-1.818	1.979	-2.17	0.975	0.171	-2.483	0.706	0.732	-0.418	0.962	-0.627	0.221	0.402	-0.791	1.756	0.467	-1.495	-0.12	0.987	-0.747	-0.184	-0.636	-1.198	2.015	1.489	-1.735	2.305
-1.997	-0.558	-1.167	-0.248	0.355	0.198	2.171	0.315	1.031	-1.881	-0.995	-1.765	-2.044	-0.047	-0.507	-1.561	-1.973	-1.482	-1.047	-0.667	-2.406	-2.906	-1.1	-2.343	-2.387	-0.602	0.43	-2.9	0.674	-0.776	-0.792	0.763	-0.209	0.306	-0.069	0.591	1.604	0.697	0.594	0.48	-1.089	0.05	-0.137	-0.211	1.632	2.069	0.909	-0.412	2.635	-0.084
2.313	-1.056	-0.635	0.058	-0.029	0.092	-2.34	1.117	0.641	2.998	-1.125	-0.474	1.54	-0.918	-0.727	3.272	-1.426	0.537	3.668	-0.31	-0.772	3.167	-2.009	-1.13	0.949	-1.905	-0.92	1.564	-0.459	-1.712	0.794	-0.191	0.33	-0.668	0.14	-0.146	-1.57	0.906	0.89	-1.22	-0.79	-0.341	-0.739	0.651	-1.146	-1.673	0.22	1.748	-3.015	1.274
1.496	-0.198	-1.879	-0.371	-0.193	-0.125	-1.286	0.295	1.991	2.166	-0.023	-2.04	0.756	-0.379	-1.62	2.183	1.058	-2.435	2.469	-0.55	-2.874	2.964	-0.001	-1.284	0.59	-1.459	-1.535	0.114	0.037	-2.442	0.307	0.097	-0.303	-1.045	-0.469	0.052	-1.717	0.204	1.345	-0.911	-1.563	0.239	-1.71	-0.397	-0.831	-2.058	1.243	1.005	-0.858	0.333
0.993	-0.974	2.13	0	0.152	0.085	-1.012	0.851	-2.198	1.592	-1.303	2.333	0.353	-0.603	1.834	2.482	-0.545	2.316	1.772	-2.183	1.659	1.543	-1.665	3.36	0.13	0.302	2.507	-0.49	-1.268	1.926	0.595	-0.123	0.443	-0.599	0.414	-0.273	-0.37	0.645	-1.778	-0.899	1.321	0.233	-1.482	-0.245	-0.079	0.366	1.489	-1.894	-1.62	1.034
-1.904	0.039	-1.55	-0.073	0.373	0.255	1.945	-0.235	1.381	-2.048	-0.47	-2.044	-1.673	0.564	-0.996	-3.127	-0.475	-2.158	-1.736	-1.464	-1.725	-1.491	-0.173	-2.969	-2.353	0.584	-0.117	-1.837	1.529	-1.498	-0.19	0.396	-0.527	0.042	0.376	1.022	1.563	0.45	1.474	-0.379	-0.495	1.512	-0.553	1.197	1.493	2.153	1.217	0.944	2.229	-0.882
-0.952	0.662	2.091	-0.27	0.195	-0.104	1.157	-0.771	-2.014	-0.511	0.769	2.599	-1.375	0.562	1.465	-0.217	1.811	2.752	0.384	0.142	2.621	-1.098	0.468	3.415	-2.244	1.269	1.521	-1.803	-0.465	1.539	-0.727	0.76	0.107	0.187	-0.372	-0.305	0.77	-0.141	-1.727	-0.461	-1.245	-0.281	1.033	-0.437	0.397	-0.089	0.006	-2.463	1.508	-1.368
-1.434	-1.304	1.842	0.237	-0.07	0.048	1.254	1.363	-1.861	-1.87	-1.826	2.027	-0.921	-0.744	1.575	-2.325	-1.68	3.065	-1.422	-2.821	2.107	-2.626	-2.106	1.244	-0.194	-0.485	2.383	-1.518	0.128	1.384	-0.199	-0.717	0.173	0.65	0.584	-0.078	0.816	0.763	-1.6	1.636	0.506	0.46	0.162	1.5	0.209	1.356	-0.124	-1.988	1.652	1.917
-0.671	-0.167	2.031	0.934	0.007	0.21	-0.116	0.097	-2.201	-0.843	0.354	2.448	-0.408	-0.699	1.543	-0.138	0.467	3.3	-1.811	-0.039	2.824	-1.029	1.354	2.02	-1.207	-0.873	0.723	-0.254	-1.63	2.138	0.927	-0.461	0.785	0.818	0.431	-0.393	0.047	-0.328	-1.53	1.878	0.584	-0.706	0.239	1.326	-0.122	0.746	-1.104	-1.898	-0.238	0.533
1.725	0.49	1.937	-0.076	-0.101	0.034	-1.643	-0.454	-1.948	2.31	0.263	2.323	1.091	0.679	1.459	2.464	1.058	3.062	3.187	0.19	1.653	2.12	-0.652	2.92	1.25	1.682	1.03	0.184	0.637	2.109	0.617	-0.278	0.338	-0.761	0.075	-0.27	-0.99	-0.761	-1.538	-0.703	1.203	-0.502	-1.553	-0.092	0.392	-0.11	-0.775	-2.259	-2.243	-0.139
2.257	0.854	0.423	0.156	-0.097	-0.38	-2.382	-0.749	-0.186	2.456	0.882	1.131	1.976	0.77	-0.358	3.088	0.012	1.413	1.582	0.905	1.794	3.029	1.778	1.341	2.881	0.435	-0.906	1.667	1.795	-0.653	0.843	-0.237	-0.739	-0.545	0.06	-0.035	-1.728	-0.677	-0.6	-0.778	1.1	-0.117	-0.427	-0.224	1.035	-1.912	-0.174	-1.592	-2.937	-0.769
-1.18	-1.287	1.693	0.377	-0.662	-0.412	0.871	1.829	-1.373	-1.536	-1.855	1.945	-0.764	-0.713	1.335	-2.387	-1.959	1.269	-1.856	-1.546	2.943	-1.021	-2.825	2.113	0.07	-0.379	2.046	-1.424	0.216	1.362	-0.173	-1.093	-0.08	0.88	-0.13	-0.691	0.388	1.299	-0.95	1.288	-0.573	-1.589	1.721	-0.084	0.084	-0.605	1.283	-1.492	1.349	2.239
-0.911	-2.163	1.153	0.107	0.01	0.041	0.765	2.189	-1.195	-1.095	-2.403	1.777	-0.709	-1.824	0.506	-1.763	-3.317	1.739	-1.455	-1.585	2.467	-0.233	-2.837	2.158	-1.466	-1.821	-0.3	0.137	-2.436	-0.009	-0.172	-0.319	0.671	0.362	0.363	-0.598	0.356	1.876	-0.628	-0.22	-0.088	-1.462	1.402	-0.066	-0.685	-0.685	2.246	-0.634	1.142	2.401
-1.112	-0.53	2.008	0.135	0.056	0.076	1.003	0.467	-2.077	-0.943	-0.267	2.659	-1.265	-0.76	1.265	-1.21	-1.004	3.453	-1.42	0.655	2.886	0.124	-0.126	2.64	-2.356	-0.851	1.205	-0.894	-1.705	0.95	-0.593	0.165	0.242	0.85	-0.066	-0.105	1.398	0.649	-1.344	0.991	-1.163	-0.298	1.614	0.109	0.764	1.207	1.7	-1.093	0.61	0.257
-0.745	-2.214	-1.141	-0.231	0.024	-0.02	0.861	2.21	1.151	-0.594	-2.554	-1.77	-0.875	-1.77	-0.481	0.453	-2.877	-1.771	-0.81	-1.979	-2.707	-1.139	-3.577	-1.671	-0.546	-2.298	0.464	-1.944	-1.569	-0.388	-0.158	-0.465	-0.648	-0.295	0.499	0.611	0.788	1.653	0.561	-0.105	-0.032	1.556	-1.322	0.944	0.625	1.727	1.074	0.536	0.852	2.689
-1.264	0.115	2.008	-0.654	0.059	-0.568	1.793	-0.135	-1.569	-1.679	0.404	2.535	-0.833	-0.148	1.345	-1.658	1.545	2.694	-1.311	-0.1	3.419	-2.722	0.047	2.362	-0.975	-1.233	1.413	0.154	0.025	1.78	-1.047	0.421	0.006	-0.174	-0.309	-1.067	1.254	0.189	-1.026	-0.561	-0.039	-2.053	-0.163	-1.412	-0.901	1.288	1.279	-1.135	2.209	-0.458
1.29	2.061	-0.027	-0.795	0.299	0.246	-0.56	-2.309	-0.179	1.475	2.751	-0.227	1.006	1.311	0.174	2.405	3.102	0.336	0.722	3.561	0.007	1.61	2.776	-1.278	1.299	1.058	1.212	1.595	0.515	-0.432	-0.495	0.995	0.014	-0.948	-0.43	0.464	-0.132	-1.6	-0.142	-2.047	-0.67	0.171	-0.927	-0.499	1.606	0.29	-1.281	-1.067	-1.004	-2.919
0.668	-1.113	1.659	0.781	0.086	-0.672	-1.325	1.031	-1.225	0.76	-0.979	2.347	0.597	-1.167	0.869	0.102	-0.246	2.796	1.777	-0.737	2.515	0.544	-1.938	2.948	-0.493	-1.509	0.78	1.17	-2.081	0.484	0.967	0.099	0.06	0.48	0.032	-1.392	-0.946	0.457	-1.634	0.834	-0.962	-1.686	1.134	0.671	-2.019	-1.135	0.655	-2.711	-1.602	1.562
0.863	2.184	-0.841	0.082	-0.183	-0.106	-0.821	-2.158	0.895	0.965	2.855	-0.589	0.724	1.398	-1.049	1.68	3.396	-1.274	1.378	2.972	0.365	0.014	3.495	-0.557	1.746	1.059	-1.383	-0.078	1.376	-1.884	0.17	0.549	0.152	0.029	-0.926	-0.356	-0.126	-2.199	0.503	0.899	-1.052	-1.126	-0.891	-1.008	-0.984	-0.215	-3.039	-0.101	-1.445	-2.074
-1.11	0.731	2.117	0.147	0.236	0.019	1.09	-0.832	-2.198	-1.799	0.876	2.251	-0.358	0.61	1.868	-1.84	0.239	3.149	-2.589	0.483	1.562	-2.042	1.92	2.578	-0.221	-0.399	2.145	0.381	1.124	2.528	-0.22	0.817	0.331	0.532	-0.35	-0.294	0.88	-0.132	-1.799	0.084	-1.322	-0.151	1.499	-0.368	0.174	-0.016	0.224	-2.223	1.285	-1.487
1.284	-1.663	-0.915	0.387	0.139	-0.155	-1.489	1.541	1.072	0.754	-2.148	-1.068	1.8	-1.07	-0.745	1.381	-3.056	-1.265	0.129	-2.001	-1.995	0.129	-2.401	-0.22	2.593	-0.933	-1.554	2.349	-1.211	0.247	1.073	0.23	-0.572	-0.265	0.044	0.285	-0.728	1.392	0.825	-0.137	-0.684	1.129	-1.099	-0.367	-0.39	0.002	1.781	1.552	-2.19	1.585
-0.81	-1.407	-1.737	-0.36	0.252	-0.143	1.019	1.234	1.816	-0.34	-1.908	-1.961	-1.276	-0.807	-1.464	0.518	-2.045	-1.212	0.038	-1.6	-2.952	-0.808	-2.853	-2.133	-1.964	-1.179	-0.634	-1.885	-0.553	-2.335	-0.578	0.362	-0.839	-0.128	0.13	0.545	0.609	1.38	1.14	0.593	-0.68	0.556	-1.037	-0.057	1.221	1.371	1.696	0.381	1.347	1.028
1.846	-1.2	-1.507	-0.02	-0.005	-0.046	-1.814	1.232	1.541	2.573	-1.234	-1.674	1.079	-1.09	-1.263	3.143	-1.342	-0.721	2.881	-0.406	-2.364	2.656	-2.148	-2.301	0.629	-2.057	-0.868	0.399	-0.946	-2.208	0.755	-0.053	-0.218	-0.793	0.04	0.109	-1.095	1.198	1.192	-0.985	-0.942	0.638	-1.356	0.182	-0.815	-0.307	1.133	1.968	-2.483	1.21
0.36	-1.407	-1.95	-0.394	-0.147	0.166	-0.194	1.494	1.826	0.788	-1.348	-2.517	-0.109	-1.41	-1.318	0.609	-0.491	-3.155	0.759	-2.296	-3.063	1.758	-1.179	-2.1	0.298	-2.183	-0.557	-1.139	-1.546	-1.64	-0.076	-0.089	-0.536	-0.727	-0.2	0.866	-0.899	1.061	1.724	-0.182	-0.976	1.443	-1.764	-0.584	0.68	-1.623	1.679	1.253	0.458	1.842
1.742	-0.846	1.71	-0.01	-0.036	-0.046	-1.724	0.882	-1.696	2.144	-1.39	1.926	1.25	-0.292	1.405	2.831	-1.677	1.146	1.614	-2.331	2.257	2.765	-0.899	2.743	1.89	0.559	1.173	0.686	0.005	2.309	0.355	-0.674	0.162	-0.37	0.61	-0.261	-1.233	0.294	-1.442	0.359	1.376	-0.568	-1.011	0.813	0.626	-0.534	0.061	-2.256	-2.124	1.458
-1.562	-0.405	-1.892	-0.09	-0.195	0.288	1.589	0.565	1.773	-1.812	-0.071	-2.464	-1.25	-0.707	-1.22	-2.264	-0.761	-3.254	-0.971	0.381	-3.039	-2.518	0.706	-2.171	-0.695	-1.696	-1.486	-2.112	-1.036	-0.699	-0.285	0.172	-0.348	0.089	-0.554	0.94	0.855	0.335	1.983	0.734	-1.424	0.727	-0.86	-0.929	1.411	0.157	1.175	2.261	2.244	0.751
0.683	0.719	2.227	-0.242	0.026	0.164	-0.536	-0.78	-2.361	1.096	1.309	2.345	0.203	0.105	2.02	0.485	2.255	2.439	1.929	1.486	1.575	1.527	1.152	3.357	-0.476	-0.102	2.876	0.746	-0.903	1.954	-0.601	0.109	0.825	0.119	-0.098	-0.495	-0.767	-0.71	-1.593	1.096	-0.56	-0.373	0.387	0.962	-0.831	-0.916	-1.81	-1.306	-0.279	-0.811
-1.076	-2.063	1.21	0.09	0.063	0.086	1.013	2.006	-1.225	-1.493	-2.641	1.033	-0.611	-1.391	1.333	-1.665	-3.313	1.877	-0.938	-3.262	0.295	-2.534	-2.468	0.74	0.359	-1.719	1.823	-1.177	-0.671	1.955	-0.298	-0.589	0.003	0.474	0.696	0.175	0.674	1.288	-1.223	1.387	0.513	0.636	-0.05	1.469	0.767	1.192	0.523	-1.842	1.316	2.65
0.928	0.614	1.986	0.604	-0.597	-0.224	-1.497	-0.153	-1.765	1.342	1.176	2.129	0.507	-0.039	1.743	2.407	0.927	2.256	0.961	1.562	3.072	1.15	2.013	1.432	-0.537	0.339	1.685	0.745	-0.694	2.676	0.747	-0.9	0.475	0.349	-0.242	-0.862	-1.175	-0.132	-0.999	0.707	-0.845	-1.65	0.958	0.702	-1.011	-1.605	-0.994	-0.495	-1.735	-0.17
1.915	0.797	1.592	0.095	0.037	-0.136	-1.93	-0.821	-1.497	2.466	0.566	1.95	1.301	0.981	1.153	2.749	1.369	2.691	3.395	0.207	1.42	2.119	-0.281	2.583	1.651	1.914	0.508	0.415	1.344	1.732	0.69	-0.122	0.298	-0.5	0.198	-0.568	-1.248	-0.998	-1.111	-0.304	0.893	-1.393	-1.287	0.738	0.158	-0.625	-1.393	-1.944	-2.507	-0.593
2.102	-0.815	0.856	0.168	0.011	-0.286	-2.183	0.798	-0.695	2.056	-1.249	1.431	2.066	-0.362	0.196	1.65	-2.236	1.245	1.41	-0.835	2.235	3.103	-1.29	1.78	2.956	-0.655	-0.498	2.367	0.701	0.536	0.743	-0.402	-0.567	-0.392	0.424	-0.009	-1.614	0.325	-0.876	-0.07	1.467	0.118	-0.626	0.119	1.044	-1.309	0.438	-1.964	-2.645	1.246
-0.567	-1.867	1.289	0.847	-0.2	-0.222	-0.192	2.078	-1.083	-0.611	-2.577	1.452	-0.458	-1.093	1.054	-0.932	-3.158	0.604	-1.377	-2.737	2.209	0.362	-2.943	1.906	-0.272	-0.526	1.943	-1.408	-0.72	0.641	0.636	-0.913	0.004	0.926	0.546	-0.402	-0.352	1.361	-0.783	1.656	0.518	-1.219	1.46	1.105	0.454	-0.816	0.755	-1.591	0.012	2.725
0.201	-1.981	1.737	-0.073	-0.02	-0.001	-0.112	2.009	-1.776	0.056	-2.665	1.861	0.337	-1.236	1.497	0.124	-2.762	2.938	0.787	-3.374	1.559	-1.032	-2.888	1.626	1.445	-1.043	1.727	-0.201	-0.555	2.207	-0.173	-0.777	0.147	0.043	0.743	-0.162	-0.245	1.238	-1.611	1.101	0.897	0.082	-0.589	1.291	0.552	0.241	0.61	-2.394	0.032	2.721
-1.082	-0.456	2.015	-0.071	-0.121	-0.073	1.12	0.582	-1.96	-0.767	-0.261	2.636	-1.378	-0.613	1.286	-1.131	-1.009	3.306	-1.055	0.771	2.996	0.316	-0.45	2.635	-2.455	-0.388	1.464	-1.301	-1.651	0.976	-0.714	0.231	0.177	0.578	-0.453	-0.302	1.362	0.466	-1.205	0.315	-1.494	-0.712	1.207	-0.555	0.572	1.488	1.457	-0.62	0.839	0.656
-0.156	-2.333	-1.15	-0.034	0.021	-0.053	0.225	2.302	1.167	-0.26	-2.704	-1.765	-0.059	-1.847	-0.5	0.548	-2.588	-2.555	-1.195	-2.53	-2.311	-0.191	-3.712	-1.447	0.972	-2.114	-0.105	-0.849	-2.099	0.262	-0.087	-0.339	-0.732	0.041	0.37	0.608	0.241	1.857	0.464	0.893	0.047	1.274	-0.842	0.318	1.173	1.068	2.246	-0.17	0.221	2.634
-1.404	-0.639	1.802	-0.577	0.292	-0.516	1.919	0.377	-1.404	-1.88	-0.443	2.331	-0.904	-0.795	1.141	-1.62	0.541	2.632	-1.655	-1.113	3.243	-2.936	-0.507	2.121	-1.232	-1.805	0.973	0.124	-0.775	1.627	-0.983	0.328	0.155	-0.088	0.209	-1.101	1.421	0.566	-0.804	-0.388	0.866	-1.966	-0.086	-0.851	-1.502	1.385	1.628	-0.571	2.323	0.188
1.93	1.377	-0.182	-0.547	0.613	0.363	-1.444	-1.882	-0.158	2.376	1.956	-0.218	1.382	0.793	-0.136	3.423	1.564	-0.157	2.116	2.704	0.601	2.24	2.429	-1.198	1.737	0.148	0.746	1.364	0.108	-1.022	-0.062	1.129	0.13	-0.959	0.004	0.513	-0.876	-1.306	-0.291	-1.963	0.438	0.644	-0.596	-0.274	1.548	-1.049	-1.044	-1.361	-1.971	-2.345
1.566	-0.668	1.389	0.458	0.196	-0.855	-1.943	0.429	-0.735	1.866	-0.437	2.016	1.251	-0.851	0.666	1.234	0.358	2.452	2.84	-0.027	1.846	1.836	-1.205	2.747	0.301	-1.416	0.861	1.808	-1.634	0.186	0.917	0.303	-0.266	-0.081	0.016	-1.363	-1.477	-0.213	-0.956	0.233	-0.873	-2.017	0.024	0.804	-2.101	-2.064	-0.659	-1.848	-2.302	1.048
0.922	2.297	-0.48	0.326	-0.281	-0.026	-1.155	-2.109	0.492	0.679	2.997	-0.444	1.111	1.497	-0.503	1.685	3.573	-0.491	0.229	3.216	0.552	-0.077	3.245	-1.249	1.984	1.441	0.11	1.439	1.186	-1.49	0.009	0.407	-0.144	0.639	-0.972	0.092	-0.394	-1.93	0.764	1.521	-0.887	0.746	0.979	-1.335	-0.848	0.121	-3.017	0.726	-1.827	-2.219
-1.043	0.388	2.419	0.083	0.014	0.003	0.991	-0.365	-2.425	-0.953	0.581	3.092	-1.069	0.204	1.646	0.105	0.386	3.459	-1.67	0.015	3.723	-1.14	1.669	3.248	-1.97	0.674	1.232	-1.29	-0.893	1.629	0.111	0.423	0.687	0.046	-0.373	-0.693	1.183	-0.093	-1.704	-0.905	-0.17	-1.193	0.043	-1.552	-0.416	1.467	0.994	-1.833	0.757	-0.645
1.53	-1.659	-0.915	0.194	-0.039	0.209	-1.634	1.661	0.814	1.959	-1.498	-1.48	1.078	-1.767	-0.276	1.699	-0.479	-1.935	1.8	-2.326	-2.24	2.968	-1.56	-1.178	1.429	-2.52	0.473	0.032	-2.036	-0.586	0.691	-0.499	0.529	-0.318	0.409	-0.089	-0.922	1.346	0.943	-1.095	-0.268	-0.598	0.122	0.963	-0.974	-0.997	0.821	1.814	-2.268	1.916
-1.841	-1.313	-1.173	-0.233	0.134	0.234	2.011	1.17	1.016	-2.249	-1.33	-1.801	-1.38	-1.241	-0.487	-1.734	-0.768	-2.667	-3.153	-0.658	-1.62	-2.65	-2.265	-2.059	-0.419	-1.879	-0.618	-1.874	-1.643	0.422	-0.818	0.14	-0.243	0.375	0.108	0.706	1.458	1.16	0.407	0.852	-0.914	0.618	0.07	0.287	1.723	2.046	0.902	-0.514	2.471	1.127
1.452	-0.72	-2.079	-0.157	0.02	-0.09	-1.369	0.686	2.153	1.791	-0.511	-2.701	1.028	-0.886	-1.372	2.572	0.316	-2.512	1.165	-0.03	-3.425	2.403	-1.388	-3.184	1.772	-1.282	-0.652	0.36	-1.723	-1.631	0.267	0.276	-0.679	-0.554	-0.244	0.503	-0.884	0.899	1.542	-0.098	-1.068	1.073	-1.498	-0.536	0.137	0.09	1.24	2.087	-1.828	0.427
0.034	-1.442	-1.906	-0.315	-0.178	0.226	0.167	1.541	1.831	0.202	-1.348	-2.609	-0.129	-1.471	-1.103	-0.759	-0.923	-3.048	0.349	-2.396	-3.107	0.98	-0.634	-2.833	0.686	-1.965	-0.654	-1.141	-2.065	-1.072	-0.272	-0.069	-0.524	-0.357	-0.273	0.984	-0.48	1.02	1.831	0.525	-0.926	1.305	-1.261	-0.959	1.091	-1.209	1.658	1.324	0.763	1.949
1.945	-1.697	-0.225	-0.003	0.052	-0.028	-1.989	1.685	0.306	2.145	-2.349	-0.509	1.624	-0.971	0.087	2.056	-2.26	-1.592	1.63	-3.33	-0.223	3.342	-2.544	-0.355	2.297	-0.265	-0.445	1.836	-0.961	1.16	0.182	-0.653	-0.189	-0.197	0.775	0.141	-1.717	0.986	0.112	0.307	1.436	-0.668	0.199	0.871	1.157	-2.001	0.887	-0.969	-2.162	2.313
0.426	-0.363	-2.329	0.152	-0.434	0.263	-0.565	0.676	2.211	0.095	-0.297	-2.985	0.705	-0.418	-1.56	0.89	0.057	-3.753	-0.723	0.432	-2.913	-0.283	-1.274	-3.334	1.575	0.257	-1.444	1.272	-1.422	-1.558	-0.281	-0.42	-0.384	0.575	-0.433	0.902	-0.35	-0.094	2.177	1.391	0.359	0.803	1.125	-1.358	1.039	-1.244	-0.75	1.938	-0.726	1.383
0.157	-0.09	2.37	-0.171	0.327	0.107	-0.189	-0.161	-2.403	0.83	-0.312	2.555	-0.554	0.19	2.091	1.602	0.47	2.393	0.962	-1.264	1.965	0.809	-0.659	3.669	-0.885	0.966	2.815	-1.252	-0.647	2.139	-0.482	0.78	0.637	0.071	-0.164	-0.416	-0.525	0.182	-1.765	0.035	-1.225	-0.171	1.189	0.048	-0.4	-1.641	0.013	-1.918	0.138	-0.505
-1.093	-1.677	1.557	-0.003	0.099	0.124	1.14	1.589	-1.599	-1.747	-1.9	1.7	-0.401	-1.381	1.362	-1.647	-2.81	2.334	-2.223	-2.265	0.755	-2.401	-1.161	2.22	0.254	-2.112	0.861	0.109	-0.907	2.226	-0.618	-0.341	0.251	0.624	0.534	0.001	0.484	1.407	-1.173	1.494	-0.214	-0.155	0.775	1.158	0.943	-0.266	1.041	-1.892	1.775	1.699
0.633	0.412	1.966	0.922	0.246	-0.376	-1.289	-0.69	-1.609	0.401	1.039	2.26	0.925	-0.226	1.577	1.155	1.768	2.356	-0.041	0.68	3.224	-0.432	1.515	1.749	0.077	-0.894	1.428	1.689	-0.885	2.216	1.471	0.103	0.184	0.31	0.305	-0.877	-0.646	-0.879	-1.192	0.759	0.753	-1.813	-0.429	1.092	-0.484	-0.132	-1.688	-1.814	-1.844	-0.447
2.152	0.468	1.34	0.018	0.002	0.007	-2.139	-0.431	-1.388	2.652	0.147	1.746	1.567	0.762	0.863	3.39	0.916	2.066	3.233	-0.668	1.188	2.194	-0.31	2.603	2.066	1.291	0.099	0.899	1.43	1.587	0.664	-0.321	0.302	-0.613	0.323	-0.299	-1.4	-0.679	-1.162	-0.409	1.211	-0.967	-1.286	0.611	0.51	-0.834	-1.119	-2.07	-2.787	-0.13
1.095	-1.725	1.165	0.423	0.105	-0.027	-1.355	1.664	-1.099	0.677	-2.327	1.227	1.531	-1.043	1.033	0.579	-2.901	0.275	-0.35	-2.014	1.563	1.07	-3.027	2.04	2.574	-1.244	0.917	1.387	-0.388	1.877	1.106	-0.205	-0.144	-0.269	0.429	0.111	-0.607	1.371	-1.03	-0.2	0.939	1.054	-1.012	-0.32	0.075	0.103	2.257	-0.921	-2.046	1.882
-1.397	-1.654	0.881	0.772	-0.495	-0.164	0.751	2.117	-0.73	-1.806	-2.23	0.793	-0.901	-1.017	0.912	-1.994	-2.58	-0.258	-2.721	-2.195	1.473	-1.306	-3.144	1.206	-0.448	-1.02	1.957	-1.543	-0.073	0.717	0.245	-1.039	-0.118	1.204	0.135	-0.185	0.454	1.36	-0.841	2.123	-0.219	-0.765	1.449	0.42	0.859	0.411	1.188	-1.967	1.068	2.752
0.653	-2.268	1.154	0.072	-0.083	-0.162	-0.721	2.307	-1.066	0.671	-2.953	1.18	0.577	-1.499	1.066	1.111	-3.262	2.181	1.325	-3.265	0.274	-0.258	-3.561	1.078	1.663	-1.147	0.984	0.103	-1.089	2.006	0.005	-0.836	-0.201	0.122	0.663	-0.123	-0.731	1.484	-1.074	1.21	0.951	-0.227	-0.137	1.049	0.887	-0.663	1.068	-2.132	-0.643	3.032
-1.436	0.155	1.893	0.003	-0.194	-0.019	1.428	-0.008	-1.865	-1.327	0.631	2.398	-1.513	-0.343	1.288	-1.689	0.209	3.376	-1.758	1.671	2.169	-0.229	0.826	2.514	-2.606	-0.26	1.078	-1.274	-1.409	1.519	-0.762	-0.095	-0.076	0.774	-0.283	0.038	1.618	0.218	-1.12	0.968	-1.339	0.157	1.147	0.215	0.97	1.632	1.336	-1.013	1.199	-0.233
-0.505	-2.325	-1.058	0.226	-0.088	0.092	0.349	2.326	1.039	-0.676	-2.559	-1.734	-0.313	-2.01	-0.341	0.22	-2.64	-2.396	-1.298	-1.899	-2.291	-1.148	-3.551	-1.653	0.56	-2.627	0.108	-1.132	-1.884	0.449	0.18	-0.513	-0.541	0.267	0.33	0.722	0.399	1.815	0.416	1.068	-0.01	1.467	-0.686	0.131	1.325	1.236	2.045	-0.198	0.305	2.714
-2.255	0.206	0.881	-0.069	0.474	-0.557	2.275	-0.673	-0.354	-2.791	0.586	1.189	-1.635	-0.141	0.536	-2.467	1.381	1.85	-3.444	-0.154	1.73	-3.33	1.101	0.338	-1.986	-0.81	-0.245	-1.048	-0.873	1.177	-0.64	0.778	-0.152	0.498	0.066	-0.858	1.547	-0.568	-0.028	1.008	0.853	-1.49	0.079	-0.645	-1.564	1.704	0.16	0.797	2.897	-0.746
0.318	1.812	-1.512	0.505	0.279	0.576	-0.729	-2.039	1.052	0.158	2.506	-1.717	0.501	1.071	-1.194	-0.336	2.354	-2.685	1.083	3.136	-1.872	-0.594	3.002	-1.048	1.424	0.78	-1.656	-0.256	0.354	-1.637	0.426	1.008	0.263	0.515	-0.496	0.796	-0.806	-1.258	0.792	0.819	-0.375	1.799	1.274	-1.043	0.216	-1.652	-0.744	1.317	-0.589	-2.717
1.228	-0.914	1.49	0.623	0.278	-0.701	-1.777	0.583	-0.985	1.496	-0.708	2.128	0.954	-1.072	0.745	0.736	-0.02	2.621	2.501	-0.184	2.105	1.555	-1.616	2.817	-0.084	-1.356	0.844	1.501	-1.958	0.328	0.921	0.228	0.016	0.217	0.24	-1.351	-1.276	0.049	-1.409	0.658	-0.597	-1.93	0.622	1.158	-1.836	-1.584	0.042	-2.555	-2.175	1.097
0.966	1.028	-2.032	0.398	-0.172	0.223	-1.227	-0.955	1.904	1.028	1.712	-2.311	0.879	0.289	-1.643	0.981	1.612	-3.388	2.024	2.108	-2.084	0.223	2.435	-1.992	1.856	-0.16	-1.785	0.067	-0.185	-2.231	0.383	0.443	-0.207	0.388	-0.804	0.645	-0.417	-0.749	1.97	1.489	-1.07	0.784	-0.039	-1.609	0.035	-0.057	-1.452	2.634	-1.932	-1.137
-0.457	0.483	2.474	0.03	0.081	-0.048	0.447	-0.538	-2.494	-0.446	0.994	2.985	-0.435	-0.022	1.837	0.633	1.213	3.237	-1.003	0.439	3.861	-0.98	1.952	2.911	-1.526	-0.39	1.596	0.213	-0.865	2.252	0.121	0.577	0.528	-0.048	-0.432	-0.62	0.542	0.002	-1.922	-1.178	-0.528	-0.781	0.459	-1.346	-0.321	0.209	1.038	-2.159	0.32	-1.056
1.612	-1.507	-0.79	0.395	0.1	0.399	-1.881	1.436	0.488	1.449	-1.738	-1.441	1.741	-1.176	-0.095	0.483	-2.25	-1.416	2.189	-2.577	-1.582	1.565	-0.99	-2.268	2.844	-1.062	0.059	1.389	-1.851	0.749	1.155	0.147	0.319	-0.374	0.056	0.458	-1.037	1.395	0.5	-0.66	-0.605	1.39	-0.775	-0.418	-0.475	-0.601	1.896	1.424	-2.636	1.382
-1.709	-1.168	-1.553	0.288	-0.039	-0.278	1.432	1.167	1.766	-2.125	-1.135	-2.161	-1.223	-1.157	-0.914	-1.58	-0.706	-3.006	-2.936	-0.462	-1.94	-2.418	-2.197	-2.377	-0.71	-2.118	-0.838	-1.734	-0.883	0.024	-0.213	0.023	-0.857	0.739	-0.1	0.332	0.888	1.153	1.181	1.782	-0.351	-0.01	0.374	-0.886	1.114	1.023	2.047	0.469	1.936	1.114
-0.044	-0.897	-2.456	-0.177	-0.008	-0.012	0.135	0.893	2.437	-0.004	-0.737	-3.18	-0.116	-1.001	-1.648	0.94	-0.121	-3.212	-0.874	-0.24	-3.5	0.153	-1.643	-3.791	0.836	-1.431	-1.385	-0.894	-1.717	-1.399	-0.264	0.215	-0.745	-0.083	-0.229	0.718	-0.107	0.948	1.669	0.972	-0.732	0.75	-0.807	-1.01	1.054	0.572	1.693	1.178	0.363	0.772
-0.433	-1.22	-2.071	-0.336	-0.003	0.232	0.617	1.206	1.935	-0.248	-1.161	-2.783	-0.618	-1.233	-1.277	-0.471	-0.119	-3.062	-0.72	-2.011	-3.382	0.897	-1.318	-2.874	-0.189	-2.151	-0.851	-1.679	-1.065	-1.179	-0.047	-0.003	-0.481	-0.63	-0.011	0.961	-0.175	1.087	1.87	-0.306	-0.935	1.452	-1.752	0.166	0.873	-0.685	2.055	1.563	1.347	1.276
2.214	-0.302	-1.267	0.076	0.203	0.055	-2.228	0.152	1.248	2.406	-0.553	-1.907	1.95	-0.017	-0.581	2.277	0.184	-2.785	1.814	-1.446	-2.199	3.463	-0.958	-1.846	2.323	1.013	-0.234	2.048	-0.702	0.195	0.434	0.121	-0.65	-0.296	0.267	0.766	-1.803	0.119	0.579	0.009	1.292	1.104	0.205	-0.512	1.357	-2.215	0.935	0.006	-2.536	0.186
0.571	0.264	-2.451	-0.007	-0.42	0.09	-0.545	0.005	2.425	0.34	0.548	-3.09	0.766	-0.032	-1.707	1.159	0.764	-3.814	-0.26	1.465	-2.993	-0.363	-0.279	-3.454	1.669	0.54	-1.307	1.08	-1.033	-1.926	-0.276	-0.038	-0.532	0.273	-0.804	0.717	-0.566	-0.693	2.026	1.265	-0.411	0.856	0.34	-1.807	0.489	-1.606	-0.974	1.674	-0.484	0.658
1.083	-0.434	1.985	0.096	0.437	0.099	-1.22	0.211	-2.062	1.438	-1.054	1.975	0.69	0.271	1.931	2.407	-1.129	1.51	0.897	-1.769	1.374	1.636	-1.464	2.984	1.254	1.05	2.528	-0.32	0.134	2.297	0.527	0.879	0.517	-0.355	0.002	-0.343	-0.939	0.752	-1.566	-1.13	-0.239	0.403	0.22	-0.956	-0.525	-1.599	1.522	-1.2	-1.478	-0.323
-0.103	-2.437	0.917	-0.044	0.005	0.087	0.145	2.421	-0.941	-0.576	-2.964	1.119	0.36	-1.803	0.686	-0.011	-3.824	1.546	-1.131	-3.373	0.203	-1.312	-2.562	1.897	0.913	-2.014	-0.225	1.157	-1.684	1.507	-0.419	-0.466	0.487	0.338	0.487	-0.318	-0.348	1.796	-0.697	0.677	0.055	-1.304	1.2	0.698	0.223	-0.913	1.702	-1.738	0.644	2.922
0.604	0.502	1.939	0.955	-0.326	-0.293	-1.374	-0.342	-1.678	0.654	1.241	2.034	0.582	-0.325	1.77	1.676	1.634	2.067	0.216	1.655	2.892	0.208	1.782	1.178	-0.474	-0.604	1.832	1.074	-0.919	2.615	1.225	-0.668	0.369	0.559	0.005	-0.89	-0.922	-0.528	-1.044	1.155	-0.221	-1.763	0.625	1.079	-0.776	-0.983	-1.65	-0.828	-1.693	-0.135
2.253	-0.306	1.339	0.057	0.017	-0.017	-2.296	0.349	-1.296	2.666	-0.816	1.619	1.735	0.221	1.034	3.551	-0.452	2.178	3.083	-1.374	0.749	2.087	-1.54	2.233	2.332	0.652	0.155	1.458	0.993	1.677	0.469	-0.441	0.473	-0.351	0.489	-0.5	-1.726	-0.058	-0.851	0.237	0.639	-1.422	-0.432	1.48	0.053	-1.54	-1.043	-1.346	-2.763	0.763
0.867	0.084	2.265	0.414	0.169	-0.054	-1.109	-0.198	-2.241	0.489	-0.376	2.657	1.277	0.558	1.748	0.948	-1.374	2.72	-0.582	-0.548	2.288	0.452	0.059	3.699	2.315	0.605	2.118	0.827	1.521	1.988	1.13	0.265	0.218	-0.306	0.07	-0.326	-0.435	0.014	-1.874	-0.837	0.87	0.266	-0.794	-0.855	0.129	-0.161	0.994	-2.235	-1.739	-0.4
-0.99	-1.663	1.261	0.444	0.486	0.649	0.602	1.205	-1.822	-1.116	-2.161	1.794	-0.778	-1.099	0.717	-2.074	-2.656	1.592	-1.158	-1.597	2.669	-0.294	-2.917	1.889	-1.731	-0.465	0.639	-0.726	-1.464	-0.344	0.376	-0.151	1.039	0.433	1.043	0.15	0.411	0.626	-1.311	1.442	1.497	0.162	-0.267	1.816	0.471	1.23	-0.129	-1.434	0.78	1.771
-0.421	-2.56	0.046	-0.004	-0.015	-0.058	0.446	2.561	-0.026	-0.432	-3.173	-0.319	-0.378	-1.845	0.376	-0.371	-3.884	0.528	0.437	-3.382	-0.93	-1.367	-3.258	-0.957	0.236	-1.877	1.302	-1.418	-1.612	0.689	0.096	-0.661	-0.436	-0.091	0.626	0.331	0.471	1.843	-0.43	0.469	0.527	1.298	-1.27	0.731	0.457	1.493	1.624	-0.651	0.388	3.175
-0.915	-0.821	2.057	-0.028	-0.018	0.01	0.95	0.847	-2.019	-1.214	-0.357	2.505	-0.585	-1.28	1.509	-1.544	-0.956	3.393	-2.1	0.073	2.064	-0.55	0.479	2.871	-1.195	-2.203	1.362	0.451	-1.558	1.782	-0.48	-0.654	0.06	0.424	0.617	-0.021	0.637	1.285	-1.409	1.404	0.361	0.27	0.05	1.482	0.521	-0.468	1.548	-1.709	1.239	0.412
0.957	-2.156	-1.111	0.126	0.11	0.023	-1.077	2.061	1.102	1.101	-2.5	-1.745	0.785	-1.717	-0.447	1.555	-1.78	-2.423	0.154	-2.896	-2.183	1.843	-3.392	-1.66	1.652	-1.759	0.243	-0.094	-2.091	0.116	0.417	-0.211	-0.635	-0.193	0.425	0.683	-0.87	1.665	0.442	0.753	0.673	1.232	-0.79	-0.339	1.203	-0.273	2.345	-0.264	-1.236	2.369
-2.201	-0.501	0.86	0.259	0.59	0.637	1.947	0.037	-1.424	-2.621	-0.858	1.36	-1.683	-0.089	0.357	-2.234	-1.899	1.483	-3.607	-1.032	0.931	-2.733	-0.288	2.306	-2.194	0.817	-0.005	-1.388	-0.74	-0.388	-0.327	0.29	1.082	0.801	0.81	0.089	1.266	-0.123	-1.016	1.617	1.098	0.728	0.295	1.733	-0.342	1.441	-1.198	-0.706	2.552	0.25
1.01	1.316	-1.637	0.176	0.489	0.7	-1.104	-1.782	1.041	1.036	1.907	-2.022	0.963	0.691	-1.149	1.502	1.75	-2.996	1.505	2.771	-1.537	-0.025	2.274	-2.226	1.992	0.211	-0.983	0.321	-0.016	-1.684	0.252	1.024	0.173	0.078	-0.128	1.132	-0.873	-1.159	0.571	-0.238	0.297	2.062	1.163	-0.544	1.344	-1.808	-0.549	0.44	-1.257	-2.319
0.439	-1.703	1.227	0.816	0.49	-0.094	-1.13	1.212	-1.25	0.36	-1.939	1.919	0.527	-1.394	0.492	-0.481	-1.397	2.444	1.355	-1.686	2.372	0.288	-3.087	1.839	-0.421	-1.467	0.05	1.349	-1.749	-0.074	0.733	0.115	0.591	0.798	0.785	-0.814	-0.536	0.766	-1.615	1.607	0.195	-1.358	1.267	1.733	-0.894	-0.241	1.193	-2.544	-1.625	1.619
0.142	0.79	-2.246	0.494	-0.185	0.131	-0.412	-0.665	2.178	-0.321	1.143	-2.645	0.614	0.417	-1.742	-0.462	0.589	-3.621	0.201	2.188	-2.849	-1.308	1.26	-2.089	1.65	0.792	-1.89	0.53	-0.646	-2.034	0.207	0.407	-0.246	0.806	-0.77	0.516	0.364	-0.643	1.957	1.913	-0.853	0.31	0.318	-1.718	0.07	0.839	-1.483	2.475	-1.123	-0.697
-0.245	1.86	1.737	0.035	0.066	0.041	0.195	-1.907	-1.745	0.086	2.331	2.175	-0.547	1.321	1.23	1.001	1.794	2.612	-0.735	2.643	2.88	0.429	3.194	1.57	-1.21	1.918	0.571	-1.068	0.548	1.859	0.422	0.61	0.394	-0.344	-0.483	-0.299	0.524	-1.406	-1.208	-1.085	-0.017	-1.057	-0.918	-1.093	0.447	1.309	-0.825	-1.699	-0.185	-2.331
1.837	-0.962	0.995	0.302	0.061	-0.248	-2.045	0.941	-0.848	1.575	-1.503	1.4	2.058	-0.368	0.494	0.704	-1.045	1.987	2.384	-1.796	2.097	1.21	-2.378	0.901	2.958	-0.733	0.004	2.397	0.505	1.138	1.01	-0.042	-0.503	-0.405	0.173	0.012	-1.299	0.752	-1.044	-0.22	0.923	0.776	-0.85	-0.699	0.548	-0.767	1.636	-1.496	-2.72	1.087
-1.176	-1.379	-1.82	0.059	-0.091	-0.036	1.109	1.405	1.864	-1.244	-1.397	-2.519	-1.047	-1.321	-1.046	-0.318	-1.416	-3.09	-1.723	-0.431	-2.808	-2.026	-2.19	-2.905	-0.582	-2.241	-0.74	-1.937	-1.094	-0.457	-0.13	-0.149	-0.777	0.211	-0.023	0.72	0.932	1.29	1.081	0.914	-0.838	0.903	-0.714	-0.015	1.298	1.871	1.494	0.536	1.252	1.435
1.115	0.023	-2.255	-0.055	0.032	-0.019	-1.051	-0.082	2.291	1.024	-0.268	-2.926	1.161	0.289	-1.473	-0.028	-0.338	-3.205	1.506	-1.317	-3.071	1.573	0.393	-3.631	0.806	1.417	-1.654	2.235	0.25	-1.042	0.046	-0.381	-0.668	-0.144	0.434	0.637	-1.03	-0.452	1.55	-0.727	1.383	0.446	0.843	0.632	1.021	-2.033	-0.457	1.173	-1.032	0.304
0.161	-0.92	-2.303	-0.419	-0.256	0.222	0.085	1.065	2.129	0.44	-0.625	-2.953	-0.141	-1.173	-1.553	-0.024	0.321	-3.336	0.385	-1.463	-3.681	1.466	-0.352	-2.836	0.448	-1.945	-1.149	-1.176	-1.674	-1.698	-0.236	-0.066	-0.505	-0.606	-0.447	0.944	-0.547	0.614	2.001	0.003	-1.307	1.286	-1.632	-0.798	0.901	-1.434	1.312	1.869	0.671	1.426
2.529	0.443	0.148	0.03	-0.117	-0.097	-2.574	-0.359	-0.053	3.178	0.206	0.398	1.784	0.627	-0.113	3.577	-0.727	-0.029	3.019	0.088	1.468	3.835	0.995	0.221	1.804	0.908	-1.188	1.558	1.565	0.413	0.682	-0.452	0.123	-0.643	0.24	-0.269	-1.837	-0.475	0.292	-0.708	0	-1.395	-0.621	1.293	-0.039	-1.706	-1.516	0.344	-3.204	-0.222
-0.007	-0.284	-2.548	0.347	0	0.13	-0.251	0.228	2.463	-0.496	-0.286	-3.114	0.477	-0.276	-1.865	0.076	-0.12	-4.066	-1.189	0.636	-3.036	-1.14	-1.186	-3.197	1.306	0.447	-2.034	0.963	-1.268	-1.811	-0.141	-0.14	-0.476	0.827	0.122	0.735	0.24	-0.312	2.113	1.114	1.214	0.753	1.819	-0.531	0.537	-0.095	-1.351	2.145	-0.703	0.745
2.062	-0.814	0.999	-0.063	0.17	0.358	-2.056	0.749	-1.206	2.632	-0.9	0.534	1.375	-0.659	1.467	3.351	-0.067	0.378	2.37	-1.287	-0.482	3.238	-1.705	0.952	1.795	-0.215	2.366	0.943	-1.621	1.761	0.343	0.367	0.998	-0.455	-0.019	-0.268	-1.505	1.029	-0.721	-0.985	-0.963	-0.034	0.259	-0.348	-1.028	-1.989	1.398	0.258	-2.533	0.443
0.291	-2.56	0.329	0.016	-0.017	-0.124	-0.278	2.599	-0.227	-0.038	-3.15	0.572	0.592	-1.866	0.087	0.635	-4	0.549	-0.728	-3.324	-0.267	-0.591	-3.052	1.508	1.102	-1.985	-0.925	1.352	-1.688	0.762	-0.368	-0.715	0.006	0.404	0.698	-0.248	-0.536	1.838	-0.245	1.028	0.6	-1.201	1.156	0.785	0.542	-1.231	1.897	-1.136	0.021	3.255
-0.431	-0.201	2.001	0.951	0.408	0.118	-0.259	-0.239	-2.09	-0.962	0.231	2.244	0.196	-0.622	1.686	-0.787	1.326	2.307	-1.265	-0.059	3.256	-1.871	0.145	1.618	-0.153	-1.587	1.135	0.773	-0.969	2.552	1.205	0.101	0.79	0.628	0.606	-0.559	0.079	-0.498	-1.427	1.417	1.242	-1.137	-0.294	1.284	-0.284	0.848	-1.179	-1.685	-0.544	0.061
1.77	-0.851	1.756	-0.149	0.178	0.138	-1.676	0.73	-1.897	1.976	-1.303	2.288	1.458	-0.357	1.161	2.947	-1.061	2.727	2.114	-2.335	1.85	1.266	-1.404	3.145	2.011	-0.624	0.209	1.787	0.679	1.61	0.019	-0.374	0.659	-0.295	0.705	-0.406	-1.311	0.183	-1.453	0.641	1.072	-0.986	-0.622	1.618	0.103	-0.706	-0.591	-2.063	-1.979	1.28
0.497	0.318	2.284	0.397	-0.052	0.028	-0.769	-0.237	-2.27	-0.042	0.144	2.727	1.061	0.488	1.752	-0.003	-0.951	2.91	-1.029	0.281	2.212	-0.043	0.596	3.727	2.069	0.171	2.152	1.187	1.546	1.473	0.905	-0.363	0.51	-0.121	0.259	-0.44	-0.224	-0.509	-1.748	0.181	1.296	-0.709	-1.13	0.316	0.012	0.763	-0.457	-2.261	-1.286	0.063
-1.111	-1.989	0.321	0.005	0.324	0.879	1.093	1.758	-1.027	-1.07	-2.7	0.492	-1.097	-1.187	0.198	-1.842	-3.285	-0.07	-1.337	-2.821	1.607	-0.088	-3.176	0.156	-2.119	-0.757	0.297	-0.841	-0.997	-0.939	-0.115	-0.427	1.048	0.108	1.04	0.595	0.891	1.067	-0.696	0.717	1.547	1.356	-0.841	1.557	0.404	1.674	0.269	-0.64	1.248	2.423
-0.348	-2.326	-1.128	-0.062	0.003	0.117	0.383	2.367	1.06	-0.38	-2.609	-1.797	-0.302	-1.913	-0.41	-0.412	-3.687	-1.633	0.453	-2.424	-2.464	-1.401	-2.465	-2.286	0.639	-2.405	-0.051	-1.169	-2.202	0.211	-0.115	-0.393	-0.528	-0.017	0.4	0.753	0.048	1.886	0.502	0.87	-0.002	1.41	-0.926	0.254	1.416	0.539	2.055	-0.501	0.703	2.742
-0.783	-0.624	2.128	0.005	0.064	0.049	0.84	0.548	-2.172	-1.04	-0.157	2.578	-0.505	-1.094	1.554	-1.065	-0.697	3.569	-2.054	0.231	2.317	-0.4	0.711	2.771	-1.181	-2.028	1.663	0.55	-1.29	1.798	-0.542	-0.455	0.207	0.563	0.574	-0.107	0.6	1.048	-1.585	1.56	0.132	0.119	0.284	1.48	0.479	-0.523	1.138	-1.822	1.089	0.049
0.508	-2.009	-1.679	-0.1	-0.041	0.064	-0.456	2.016	1.605	1.003	-2.171	-2.205	-0.004	-1.773	-1.093	1.98	-2.427	-1.765	1.205	-1.39	-2.988	0.584	-3.024	-2.762	0.045	-2.486	-0.225	-1.073	-1.61	-1.392	0.398	-0.412	-0.382	-0.591	0.327	0.5	0.026	1.601	1.105	-1.081	-0.339	1.294	-1.534	0.652	-0.074	0.851	1.21	1.742	-0.951	2.343
-1.484	-0.444	1.772	0.09	-0.794	-0.303	1.435	1.097	-1.499	-2.163	-0.501	1.984	-0.757	-0.417	1.473	-2.757	0.422	1.707	-2.067	-0.472	3.057	-2.661	-1.41	1.522	-0.06	-1.116	2.022	-0.439	0.719	1.586	-0.626	-0.9	0.011	0.812	-0.592	-0.565	0.804	0.841	-1.098	0.926	-1.192	-1.476	1.534	-0.771	0.209	-0.142	0.795	-1.726	2.031	1.271
1.283	1.143	-1.636	-0.011	0.641	0.659	-1.309	-1.699	1.081	1.552	1.675	-2.063	0.949	0.613	-1.129	2.275	1.161	-2.718	2.098	2.366	-1.432	0.766	2.22	-2.579	1.745	-0.002	-0.676	0.289	-0.061	-1.722	0.141	1.167	0.098	-0.174	0.026	1.126	-1.214	-1.062	0.655	-0.625	0.516	1.977	0.741	-0.529	1.397	-2.169	-0.539	0.272	-1.354	-2.251
0.281	-2.088	-0.054	0.922	0.515	0.105	-1.046	1.754	-0.092	0.377	-2.734	0.243	0.222	-1.329	-0.327	0.177	-2.724	1.359	1.378	-3.171	0.044	-0.252	-3.498	-0.208	-0.83	-1.051	-0.341	0.491	-1.338	-1.401	0.891	-0.184	0.409	0.822	1.193	-0.248	-0.524	1.675	-0.681	1.313	0.971	-1.196	1.441	1.985	0.29	-0.41	2.608	-1.34	-1.456	1.81
0.643	0.669	-2.305	0.271	-0.224	0.104	-0.784	-0.543	2.275	0.575	1.246	-2.709	0.693	0.068	-1.803	0.891	2.12	-2.129	-0.505	1.47	-2.976	1.224	1.031	-3.608	1.719	-0.181	-1.666	0.11	-0.794	-2.308	0.1	0.356	-0.38	0.456	-0.809	0.608	-0.03	-0.689	2.116	1.58	-0.791	0.528	-0.01	-1.734	0.09	0.223	-1.706	2.472	-1.474	-0.41
-0.361	2.021	1.648	-0.006	0.05	-0.06	0.335	-2.047	-1.566	0.013	2.465	2.078	-0.72	1.486	1.145	0.673	2.009	2.858	-0.697	3.101	2.579	0.777	3.087	1.579	-1.311	2.133	0.441	-1.428	0.862	1.666	0.277	0.565	0.418	-0.294	-0.464	-0.509	0.669	-1.372	-1.254	-0.847	0.065	-1.334	-1.044	-1.062	0.033	1.255	-0.839	-2.077	-0.03	-2.622
2.383	-0.568	0.246	0.165	0.227	-0.204	-2.446	0.429	-0.14	2.49	-1.25	0.505	2.192	0.172	-0.083	2.818	-1.21	1.556	3.34	-1.753	0.017	1.501	-1.875	0.564	2.91	0.417	-0.886	2.334	0.886	0.817	0.792	0.391	-0.591	-0.446	0.068	0.189	-1.738	0.504	-0.503	-0.44	0.673	1.143	-0.543	-1.007	0.402	-1.567	1.598	-0.864	-3.036	0.327
-0.757	-0.164	-2.438	0.097	0.045	-0.02	0.691	0.105	2.442	-0.548	-0.317	-3.112	-0.927	-0.024	-1.663	-0.178	-1.337	-3.244	0.357	0.374	-3.461	-1.349	0.053	-3.818	-1.687	-0.778	-1.353	-1.376	1.013	-1.525	0.313	-0.105	-0.728	-0.102	0.191	0.684	0.964	-0.057	1.672	-0.94	-0.475	0.892	-0.611	1.12	0.895	1.443	-1.095	1.715	0.375	0.27
1.598	-1.622	-1.108	0.106	0.019	0.073	-1.673	1.639	1.082	1.719	-2.304	-1.127	1.418	-0.891	-1.004	0.713	-2.849	-1.269	2.24	-2.754	-0.257	2.351	-2.411	-2.083	1.077	-0.411	-2.03	2.321	-0.275	-0.929	0.469	-0.629	0.141	-0.264	0.677	0	-1.264	0.988	1.146	-0.844	0.647	-0.947	0.494	1.502	-0.073	-1.98	0.171	1.219	-2.006	2.252
0.475	-0.97	-2.181	-0.039	-0.298	0.252	-0.473	1.106	2.06	0.532	-0.7	-2.852	0.382	-1.197	-1.402	-0.461	-0.386	-3.312	0.872	-1.601	-3.445	1.251	0.125	-2.958	1.446	-1.416	-1.025	-0.302	-2.08	-1.448	-0.17	-0.116	-0.484	0.081	-0.492	1.013	-0.652	0.316	2.007	1.107	-0.338	1.109	-0.192	-1.597	1.144	-1.725	0.233	1.802	-0.268	1.789
2.378	-1.113	-0.465	0.061	0.101	0.05	-2.382	1.064	0.386	2.848	-1.697	-0.324	1.81	-0.5	-0.586	2.331	-2.677	-0.038	3.332	-1.247	0.651	3.625	-1.869	-1.07	1.316	-0.581	-1.683	2.437	0.449	-0.416	0.603	-0.388	0.288	-0.473	0.612	-0.201	-1.722	0.631	0.627	-0.784	0.125	-1.202	-0.187	1.721	-0.252	-2.027	-0.416	0.697	-2.923	1.469
0.275	-0.467	-2.359	0.344	-0.337	0.276	-0.499	0.715	2.202	-0.119	-0.432	-2.961	0.623	-0.502	-1.645	0.685	-0.223	-3.747	-0.751	0.506	-2.912	-0.661	-1.372	-3.24	1.46	0.263	-1.558	1.196	-1.503	-1.688	-0.11	-0.423	-0.341	0.803	-0.232	0.892	0.054	0.134	2.206	1.538	0.606	0.746	1.347	-1.203	0.996	-0.569	-0.804	2.473	-0.965	1.251
1.293	-1.141	1.573	-0.06	0.251	0.326	-1.283	1.024	-1.76	1.772	-1.582	1.233	0.753	-0.608	1.88	2.652	-0.925	0.913	1.299	-2.049	0.307	2.19	-2.396	2.027	1.186	-0.172	2.809	-0.14	-1.256	2.206	0.246	0.481	0.997	-0.385	0.019	-0.34	-0.974	1.271	-1.066	-1.181	-0.654	-0.074	0.386	-0.515	-0.907	-1.79	1.663	-0.424	-1.54	0.751
-1.362	-1.674	1.504	0.061	0.009	0.043	1.327	1.69	-1.578	-2.031	-1.885	1.622	-0.635	-1.377	1.296	-1.986	-2.663	2.431	-2.544	-2.346	0.726	-2.759	-1.123	2.065	0.079	-2.235	1.069	-0.281	-1.025	2.306	-0.629	-0.289	0.198	0.749	0.314	-0.102	0.651	1.458	-1.128	1.336	-0.539	-0.589	1.267	0.709	0.799	-0.153	1.125	-1.847	1.959	1.844
-0.914	-1.007	1.733	0.721	0.377	0.481	0.343	0.601	-2.107	-1.561	-0.772	1.984	-0.172	-1.192	1.439	-1.475	0.019	2.748	-2.013	-1.657	2.403	-2.13	-0.294	1.127	-0.364	-1.882	0.618	0.273	-1.81	2.298	0.878	-0.106	1.063	0.489	0.776	-0.165	0.275	0.077	-1.487	1.373	1.479	-0.241	-0.405	1.373	0.087	1.019	-0.716	-1.654	0.421	1.109
2.133	0.336	1.434	-0.1	0.224	0.096	-2.067	-0.458	-1.526	2.492	0.106	2.017	1.668	0.576	0.806	3.579	0.41	2.067	2.54	-1.027	2.092	1.986	0.407	2.967	2.148	0.105	-0.121	1.69	1.676	0.699	0.196	0.102	0.774	-0.401	0.342	-0.593	-1.663	-0.569	-0.818	0.363	0.029	-1.322	-0.71	1.357	-0.699	-1.362	-1.612	-0.71	-2.373	-0.309
-0.042	0.33	2.421	0.371	-0.212	0.114	-0.168	-0.199	-2.495	-0.732	0.378	2.657	0.689	0.228	2.074	-1.251	-0.568	2.439	-1.224	1.307	2.348	-0.664	0.551	3.788	1.299	-0.272	2.829	1.133	1.281	2.027	0.773	-0.485	0.727	-0.025	0.06	-0.485	0.15	-0.58	-1.859	0.243	1.068	-0.655	-1.086	0.204	-0.222	1.2	-0.776	-2.126	-0.464	0.207
-0.269	-2.314	-0.066	-0.55	0.159	0.603	0.754	2.171	-0.492	-0.529	-2.957	0.149	-0.012	-1.571	-0.253	-0.401	-3.688	-0.6	-1.644	-2.891	0.351	-0.097	-3.281	1.046	-0.251	-1.42	-1.27	1.101	-1.489	-0.2	-0.467	-0.575	0.799	-0.55	0.868	0.302	0.747	1.416	-0.306	-0.773	1.458	1.239	-1.368	1.024	-0.433	1.589	1.242	0.407	0.691	2.848
-0.116	-2.072	-1.509	-0.125	-0.039	0.121	0.206	2.141	1.462	-0.279	-2.295	-2.171	0.059	-1.736	-0.785	-0.268	-3.413	-2.163	0.44	-2.009	-2.997	-1.293	-1.999	-2.529	1.062	-2.133	-0.497	-0.666	-2.164	-0.104	-0.262	-0.279	-0.627	0.003	0.206	0.87	-0.103	1.754	0.867	1.073	-0.027	1.01	-0.647	-0.302	1.626	0.49	2.132	-0.074	0.499	2.432
0.044	-1.591	1.607	0.145	-0.023	-0.025	-0.148	1.604	-1.618	-0.365	-1.45	2.167	0.471	-1.676	0.939	-0.327	-2.373	2.798	-1.418	-1.425	1.858	-0.098	-0.539	2.759	0.329	-2.735	0.669	1.531	-1.56	1.247	-0.007	-0.767	-0.196	0.276	0.716	0.145	-0.308	1.739	-0.843	1.364	0.872	0.232	-0.036	0.972	1.2	-1.401	1.752	-0.617	0.03	1.412
1.449	-1.488	-1.613	0.088	-0.172	0.195	-1.472	1.517	1.49	2.06	-1.787	-1.819	0.801	-1.148	-1.304	2.209	-2.808	-1.362	2.91	-1.066	-1.672	2.011	-1.811	-2.888	-0.044	-1.92	-1.337	0.609	-0.315	-2.02	0.801	-0.48	0.081	-0.622	0.133	0.301	-0.736	1.138	1.381	-1.494	-0.52	0.448	-0.854	0.709	-0.624	-0.343	0.81	2.387	-2.139	1.784
-2.067	-0.951	0.638	0.308	0.175	0.806	1.839	0.751	-1.34	-2.663	-1.03	1.003	-1.372	-0.832	0.295	-2.544	-1.78	1.851	-3.479	-1.523	0.386	-3.056	-0.124	1.457	-1.485	-0.107	-0.578	-0.965	-1.702	-0.191	-0.096	-0.356	1.142	0.698	0.64	0.347	1.431	0.201	-0.896	1.396	1.215	1.047	-0.063	1.422	0.09	2.221	-0.569	-0.641	2.183	1.296
-0.563	1.785	-1.385	-0.314	0.315	0.728	0.875	-2.038	0.741	-1.019	2.29	-1.6	-0.082	1.231	-1.074	-0.969	2.317	-2.712	-0.874	3.322	-1.284	-2.125	2.18	-1.251	1.044	1.44	-1.107	-0.18	0.253	-1.708	-0.66	0.795	0.261	0.089	-0.217	1.077	0.401	-1.494	0.377	-0.525	-0.542	2.033	1.015	0.262	1.505	-0.557	-2.029	0.102	1.293	-2.469
1.299	-1.692	0.003	0.383	0.71	-0.702	-1.681	1.126	0.451	1.745	-2.025	0.475	0.831	-1.242	-0.516	1.543	-1.606	1.471	2.79	-1.835	0.29	1.488	-3.115	0.527	-0.263	-1.522	-0.321	1.208	-1.766	-1.392	0.927	0.303	-0.355	-0.253	1.041	-1.008	-1.648	0.871	-0.315	-0.339	0.598	-2.047	0.04	2.101	-1.065	-2.317	1.538	-0.855	-1.635	1.369
-0.299	1.844	-1.632	0.422	-0.002	0.133	0.051	-1.823	1.539	-0.816	2.339	-1.846	0.24	1.289	-1.339	-0.841	3.113	-1.046	-1.806	1.842	-1.847	-0.593	2.653	-2.861	1.188	1.812	-1.167	0.289	0.507	-2.181	-0.085	0.528	-0.041	0.934	-0.534	0.298	0.612	-1.24	1.618	1.898	-0.057	0.371	0.925	-1.26	-0.56	1.565	-1.749	1.916	-0.465	-2.334
0.131	2.044	1.658	-0.042	0.05	-0.092	-0.091	-1.996	-1.567	0.603	2.507	2.02	-0.318	1.511	1.213	1.208	1.862	2.704	-0.133	3.237	2.506	1.269	3.002	1.283	-1.181	2.097	0.785	-0.793	0.846	2	0.408	0.566	0.261	-0.495	-0.439	-0.414	0.333	-1.361	-1.361	-1.292	-0.064	-1.06	-1.009	-1.113	0.309	0.648	-0.91	-2.351	-0.534	-2.531
1.763	-1.168	1.149	0.336	0.125	-0.198	-1.949	1.112	-1.028	1.862	-1.92	1.195	1.63	-0.374	1.027	2.304	-2.091	2.202	2.508	-2.248	0.341	0.859	-2.459	1.223	2.519	0.296	1.12	1.039	0.151	1.761	1.074	-0.037	-0.308	-0.395	0.308	-0.086	-1.172	0.894	-1.229	-0.535	1.046	0.7	-1.002	-0.586	0.314	-0.672	1.736	-1.706	-2.632	1.299
-0.2	-0.581	-2.544	-0.05	0.08	-0.038	0.187	0.579	2.544	0.2	-0.785	-3.106	-0.572	-0.327	-1.895	0.627	-1.826	-2.862	0.932	0.032	-3.317	-0.482	-1.063	-3.988	-1.215	-1.156	-1.427	-1.196	0.525	-2.153	0.335	0.003	-0.689	-0.449	0.156	0.612	0.484	0.483	1.812	-0.991	-0.758	0.896	-1.071	1.021	0.502	1.135	-0.395	1.894	-0.161	0.668
0.072	-2.295	-1.203	-0.101	0.027	-0.051	-0.004	2.308	1.258	-0.137	-2.987	-1.177	0.252	-1.502	-1.165	-1.122	-3.213	-1.58	0.113	-3.513	-0.161	0.53	-3.597	-1.785	-0.182	-1.02	-2.077	1.358	-1.329	-1.173	-0.391	-0.659	-0.068	0.203	0.711	-0.014	-0.14	1.499	1.245	-0.051	1.25	-1.02	1.256	0.589	-0.037	-1.176	1.374	1.413	0.135	3.043
0.444	-1.725	-1.77	0.114	-0.101	0.289	-0.54	1.727	1.616	0.146	-1.926	-2.405	0.704	-1.464	-1.061	-0.867	-2.385	-2.294	0.807	-2.727	-2.823	0.145	-0.96	-3.053	1.724	-0.925	-1.175	0.857	-2.345	-0.377	-0.175	-0.308	-0.396	0.394	0.111	0.989	-0.448	0.998	1.917	1.337	0.646	0.748	0.563	-0.857	1.528	-1.408	0.539	2.119	-0.586	2.338
2.417	-0.933	0.523	-0.097	-0.161	-0.096	-2.353	1.032	-0.442	2.943	-1.479	0.553	1.791	-0.384	0.469	3.157	-1.924	-0.427	2.426	-2.338	1.095	3.827	-0.904	0.982	2.131	0.383	-0.255	1.746	0.084	1.507	0.315	-0.796	0.185	-0.526	0.481	-0.349	-1.963	0.337	-0.218	-0.176	0.704	-1.372	-0.156	1.285	0.232	-2.399	-0.483	-0.822	-2.637	1.693
-0.358	-0.567	-2.38	0.482	0.15	0.045	0.118	0.471	2.354	-0.907	-0.893	-2.728	0.214	-0.233	-1.928	-0.993	-0.544	-3.722	-1.853	-0.639	-2.176	-0.619	-1.938	-2.803	0.182	0.788	-2.118	1.204	-0.597	-2.324	0.153	-0.428	-0.35	0.835	0.721	0.454	0.844	0.604	1.998	0.245	1.589	0.216	1.798	0.864	0.079	1.536	-0.237	2.189	-0.547	0.359
2.122	-0.38	1.117	0.078	0.422	0.216	-2.115	0.156	-1.274	2.546	-0.836	0.764	1.633	0.17	1.439	3.147	-0.437	-0.083	2.014	-1.695	0.308	3.049	-1.369	1.546	2.087	0.957	2.01	1.076	-0.46	2.165	0.577	0.904	0.585	-0.411	-0.055	-0.151	-1.573	0.594	-0.843	-0.781	-0.817	0.653	0.159	-0.712	-0.917	-2.253	1.026	-0.049	-2.553	-0.291
-1.596	-1.712	1.067	-0.001	-0.006	0.097	1.599	1.707	-1.111	-2.256	-1.988	1	-0.874	-1.368	1.087	-2.493	-2.804	1.763	-2.395	-2.466	-0.007	-3.037	-1.135	1.088	-0.083	-2.144	1.003	-0.716	-0.818	2.047	-0.719	-0.312	0.064	0.711	0.298	0.134	0.864	1.405	-0.981	1.484	-0.449	-0.079	0.965	0.756	1.112	0.454	1.005	-1.943	2.281	1.935
-0.397	-0.032	2.149	0.22	-0.845	-0.004	0.132	0.715	-2.131	0.13	0.231	2.589	-0.928	-0.34	1.616	0.831	-0.6	2.936	-0.445	0.614	3.453	0.731	1.023	2.114	-1.507	0.476	1.146	-1.537	-1.127	2.209	-0.242	-1.197	0.503	0.605	-0.403	-0.517	-0.209	0.463	-1.474	1.199	-1.076	-1.142	1.361	0.232	0.002	-1.103	-0.142	-1.647	0.507	0.896
2.189	0.306	1.317	0.021	-0.039	0.053	-2.223	-0.245	-1.343	2.397	0.667	1.941	1.877	-0.068	0.652	3.441	0.966	1.761	2.386	-0.02	2.786	1.921	1.579	2.159	2.235	-1.17	0.67	2.194	0.335	-0.316	0.374	0.025	0.753	-0.336	-0.096	-0.645	-1.819	-0.176	-0.633	0.009	-1.1	-1.124	0.199	0.68	-1.271	-1.942	-1.237	-0.217	-2.529	-0.292
0.163	1.881	1.469	0.352	-0.069	0.148	-0.366	-1.85	-1.574	-0.396	2.024	1.91	0.771	1.635	0.994	-0.974	1.168	2.251	-1.138	2.706	1.306	0.034	2.517	2.794	1.706	2.023	1.388	0.615	2.224	0.009	0.914	0.154	0.615	-0.195	-0.281	-0.333	0.211	-1.488	-1.123	-0.5	0.539	-1.047	-1.176	-0.497	0.215	1.158	-1.275	-1.672	-0.945	-2.136
-2.209	-1	-0.035	0.038	0.153	0.768	2.163	0.851	-0.628	-2.714	-1.503	0.172	-1.595	-0.478	-0.194	-3.502	-1.444	-0.567	-3.167	-1.148	1.189	-2.422	-2.533	0.09	-2.083	0.578	-0.247	-1.177	-0.659	-1.229	-0.484	-0.441	0.834	0.553	0.72	0.57	1.568	0.318	-0.429	1.109	0.82	1.53	-0.022	1.606	0.428	2.143	-0.632	-0.208	2.647	1.381
-0.235	-1.929	-1.805	-0.068	0.068	-0.073	0.267	1.896	1.869	-0.07	-2.167	-2.47	-0.403	-1.59	-1.083	-0.296	-3.282	-2.544	1.055	-2.138	-2.723	-0.468	-1.531	-3.291	0.028	-2.232	-0.27	-1.471	-1.652	-0.874	0.152	-0.161	-0.77	-0.29	0.307	0.631	0.331	1.645	1.112	-0.023	-0.533	1.282	-1.362	0.34	0.754	1.402	1.582	0.827	0.19	2.053
0.182	-0.847	2.269	0.092	-0.16	-0.049	-0.272	0.972	-2.222	0.024	-0.412	2.842	0.309	-1.289	1.578	0.657	-0.761	3.731	-1.084	-0.309	3.021	0.436	0.633	2.67	-0.128	-2.235	1.917	1.389	-1.474	1.412	-0.203	-0.846	0.196	0.392	0.555	-0.284	-0.462	1.148	-1.463	1.424	0.349	-0.467	0.198	1.211	0.549	-1.517	0.887	-1.298	-0.065	0.766
0.939	-1.872	-1.478	-0.057	-0.133	0.052	-0.875	1.993	1.383	1.463	-2.358	-1.488	0.383	-1.3	-1.387	1.391	-3.158	-0.696	2.49	-1.927	-1.494	1.271	-2.911	-2.463	-0.656	-1.771	-1.475	0.564	-0.606	-2.229	0.462	-0.656	0.002	-0.56	0.393	0.088	-0.372	1.36	1.25	-1.576	-0.043	0.006	-0.499	1.107	-0.74	-0.518	0.813	2.239	-1.355	2.543
-0.269	-2.259	0.702	-0.494	0.368	0.561	0.645	1.946	-1.213	-0.14	-2.818	1.139	-0.415	-1.583	0.282	0.767	-2.597	1.801	0.136	-3.707	0.483	-1.073	-3.098	1.763	-1.385	-1.75	-0.237	0.415	-1.532	-0.497	-0.352	-0.274	0.997	-0.57	0.941	0.012	0.586	1.263	-0.844	-0.657	1.826	0.67	-1.527	0.772	-0.513	1.449	1.038	-0.245	0.625	2.584
0.487	2.089	-1.069	-0.41	0.302	0.624	-0.072	-2.406	0.538	0.238	2.672	-1.459	0.692	1.421	-0.616	1.156	3.307	-1.674	-0.408	3.477	-0.941	-0.353	2.335	-2.33	1.487	1.708	0.13	1.089	0.619	-1.293	-0.493	0.947	0.179	-0.239	-0.398	0.983	-0.145	-1.707	0.152	-1.196	-0.464	1.519	0.616	-0.319	1.595	-1.133	-1.711	-0.486	0.001	-3.005
1.721	-1.28	0.385	0.073	0.455	-0.884	-1.891	0.859	0.296	2.341	-1.378	0.735	1.028	-1.102	-0.002	2.224	-1.055	1.798	3.087	-0.64	0.289	2.884	-2.369	0.685	0.171	-1.545	0.533	1.085	-1.753	-0.937	0.689	0.346	-0.469	-0.603	0.485	-1.227	-1.89	0.391	-0.368	-0.691	-0.283	-1.969	-0.598	1.486	-1.7	-2.785	0.817	-0.908	-1.831	1.305
-1.689	1.677	-0.785	0.253	-0.007	-0.288	1.581	-1.647	0.911	-2.246	2.012	-0.472	-1.051	1.258	-1.08	-1.78	2.668	0.277	-3.006	1.496	0.142	-2.807	2.506	-1.245	-0.303	2.02	-1.368	-1.493	0.695	-1.931	-0.43	0.304	-0.059	0.948	-0.297	-0.519	1.869	-0.992	0.52	1.493	0.534	-0.862	0.698	-1.039	-1.35	2.795	-1.31	0.057	1.271	-2.224
-1.181	1.157	1.983	0.283	0.001	0.164	0.925	-1.155	-2.091	-1.171	1.722	2.395	-1.144	0.551	1.487	-0.173	1.791	2.893	-1.806	1.643	3.305	-1.386	2.703	1.874	-2.052	0.512	0.838	-1.052	-0.385	2.019	0.044	0.683	0.441	0.481	-0.675	-0.124	0.975	-0.548	-1.594	-0.298	-1.434	-0.024	1.311	-1.171	0.425	0.44	0.186	-2.215	0.862	-1.725
1.817	-1.312	0.882	0.379	0.358	-0.039	-1.986	1.137	-0.816	1.539	-1.962	1.003	2.063	-0.56	0.716	2.348	-2.621	1.388	1.263	-2.527	0.058	0.707	-2.065	1.7	3.033	-0.592	0.229	2.101	0.038	1.589	1.113	0.213	-0.247	-0.325	0.511	0.179	-1.151	1.206	-0.921	-0.432	0.932	1.201	-0.9	-0.491	0.259	-0.851	2.305	-1.144	-2.719	1.043
0.202	-0.717	-2.452	-0.016	0.019	-0.046	-0.206	0.744	2.458	0.653	-1.031	-2.946	-0.251	-0.382	-1.837	0.79	-2.142	-2.71	1.731	-0.599	-3.002	0.213	-0.793	-3.997	-1.184	-0.933	-1.737	-0.512	0.63	-2.279	0.44	-0.343	-0.553	-0.468	0.396	0.447	0.229	0.633	1.766	-1.282	-0.344	0.636	-1.014	1.278	0.082	0.853	-0.236	1.989	-0.653	0.848
1.174	-2.368	0.355	-0.043	0.001	0.029	-1.103	2.364	-0.333	1.454	-2.812	0.857	0.858	-1.838	-0.127	0.676	-3.599	1.047	1.68	-2.286	1.734	2.312	-3.285	0.365	0.055	-2.307	-0.765	1.581	-1.392	-0.839	0.288	-0.494	0.536	-0.359	0.491	-0.466	-0.804	1.839	0.199	-1.28	0.013	-0.872	0.231	0.657	-1.371	-1.555	1.615	0.879	-1.357	2.805
1.357	-0.728	-1.859	-0.449	-0.167	-0.054	-1.054	0.795	1.925	1.935	-0.483	-2.217	0.7	-0.946	-1.422	1.858	0.484	-2.732	2.206	-1.203	-2.982	2.814	-0.344	-1.573	0.92	-1.735	-0.758	-0.081	-1.155	-2.199	0.168	0.112	-0.452	-1.036	-0.452	0.347	-1.504	0.655	1.288	-1.015	-1.426	0.95	-1.82	-0.51	-0.447	-1.557	1.57	0.613	-0.61	0.865
2.12	-0.525	1.318	-0.034	0.01	0.097	-2.081	0.549	-1.412	2.423	-0.922	1.883	1.731	-0.109	0.697	2.314	-2.027	1.551	1.714	-0.886	2.745	3.366	-0.538	2.295	2.297	-0.32	-0.237	1.943	0.929	0.897	0.273	-0.49	0.549	-0.342	0.502	-0.373	-1.789	0.143	-0.755	0.23	0.522	-1.338	-0.349	1.611	-0.004	-1.83	-0.915	-1.018	-2.278	0.965
-0.537	-0.872	-2.323	0.435	0.044	0.037	0.293	0.834	2.28	-0.956	-1.371	-2.647	-0.088	-0.347	-1.896	-1.256	-1.044	-3.639	-1.861	-1.527	-2.094	-0.554	-2.405	-2.755	-0.338	0.711	-2.141	0.958	-0.399	-2.205	-0.105	-0.413	-0.311	0.973	0.5	0.39	0.898	0.46	1.903	0.82	1.537	-0.018	2.025	0.239	0.084	0.89	-0.644	2.272	-0.258	1.182
1.465	-0.699	1.71	0.151	0.371	0.136	-1.576	0.478	-1.777	1.6	-1.422	1.594	1.28	0.117	1.765	2.384	-1.615	0.774	0.656	-2.019	1.323	2.082	-1.863	2.473	2.231	0.693	2.105	0.569	0.201	2.608	0.708	0.762	0.49	-0.418	-0.024	-0.213	-0.919	0.735	-1.437	-1.24	-0.155	0.536	0.066	-0.942	-0.509	-1.203	1.745	-1.074	-2.16	0.193
-0.631	-1.846	1.748	0.062	0.018	0.016	0.575	1.837	-1.722	-1.194	-2.282	1.962	-0.056	-1.332	1.459	-0.776	-3.043	2.703	-1.746	-2.845	1.095	-1.937	-1.686	2.553	0.806	-1.896	1.047	0.367	-0.671	2.245	-0.517	-0.396	0.369	0.635	0.431	-0.323	0.029	1.445	-1.25	1.421	-0.223	-0.842	1.119	0.964	0.512	-0.686	0.984	-2.055	1.113	2.158
-0.242	-0.773	1.941	-0.64	-0.642	-0.383	0.68	1.346	-1.537	0.412	-1.011	2.171	-0.958	-0.518	1.621	0.332	-2.097	2.052	0.629	-0.7	3.198	1.222	-0.699	1.497	-0.974	0.594	1.842	-1.686	-1.171	2.195	-1.193	-0.814	0.152	-0.055	-0.381	-0.826	0.138	1.135	-0.99	-0.396	-0.798	-1.827	1.022	-0.622	-0.599	-0.76	1.67	-1.168	1.18	1.467
2.399	0.746	0.881	0.033	-0.028	-0.061	-2.438	-0.758	-0.873	2.755	0.98	1.505	1.931	0.484	0.214	3.811	1.216	1.209	2.789	0.178	2.235	2.19	1.743	2.136	2.525	-0.38	-0.174	2.004	1.297	-0.5	0.472	0.132	0.535	-0.406	-0.211	-0.655	-1.86	-0.741	-0.304	0.051	-0.969	-1.367	-0.582	0.759	-1.267	-1.675	-1.792	-0.089	-2.913	-0.749
-0.598	1.545	2.004	0.109	0.073	-0.02	0.517	-1.576	-1.978	-0.34	1.913	2.569	-0.808	1.103	1.356	0.042	2.933	2.332	0.368	1.295	3.027	-1.121	2.169	3.301	-1.213	1.783	0.627	-1.641	0.423	1.71	0.354	0.325	0.659	-0.149	-0.197	-0.696	0.787	-1.246	-1.266	-0.264	0.653	-1.389	-1.162	-0.601	-0.443	1.85	-0.986	-1.444	0.22	-1.794
-2.178	-0.167	-0.682	0.323	-0.745	-0.398	1.868	0.796	1.052	-2.726	-0.313	-1.1	-1.531	-0.071	-0.261	-3.687	0.092	-0.633	-2.827	-1.364	-1.289	-2.646	0.253	-2.085	-1.595	-0.221	0.835	-1.313	1.003	-0.275	-0.255	-0.672	-0.879	0.841	-0.701	0.141	1.167	0.678	0.746	1.781	-1.116	-0.344	0.707	-1.441	0.965	0.981	1.338	-0.169	2.508	0.841
-0.098	-2.272	-1.311	-0.086	-0.017	0.058	0.228	2.29	1.27	-0.324	-2.57	-1.934	0.133	-1.871	-0.647	-0.009	-3.616	-2.026	-0.079	-2.028	-2.87	-1.397	-2.694	-1.736	1.154	-1.707	-0.588	-0.222	-2.545	0.181	-0.398	-0.408	-0.522	0.244	0.382	0.638	-0.103	1.829	0.696	1.319	0.352	0.63	-0.109	-0.148	1.49	0.098	2.291	-0.264	0.573	2.641
-1.121	-1.203	1.619	0.335	0.134	0.245	0.916	1.132	-1.74	-1.821	-1.05	1.714	-0.317	-1.308	1.432	-2.18	-1.742	2.514	-2.59	-1.168	0.902	-2.025	-0.071	2.165	-0.336	-2.367	1.335	0.289	-1.24	2.277	0.263	-0.632	0.226	0.395	0.901	0.281	0.473	1.486	-1.161	1.304	1.056	0.905	-0.458	1.382	0.696	-0.532	1.681	-1.567	1.32	0.754
0.828	-1.904	-1.655	0.01	-0.05	0.082	-0.865	1.89	1.633	1.281	-2.397	-1.778	0.333	-1.347	-1.429	1.333	-3.267	-1.043	2.315	-1.985	-1.84	1.042	-2.844	-2.791	-0.705	-1.654	-1.679	0.657	-0.534	-2.15	0.541	-0.631	-0.063	-0.521	0.517	0.228	-0.382	1.225	1.596	-1.513	0.107	-0.016	-0.355	1.283	-0.487	-0.514	0.499	2.461	-1.322	2.469
1.223	-2.049	-0.185	0.16	0.21	0.864	-1.339	1.883	-0.583	1.776	-2.536	-0.14	0.633	-1.465	-0.195	2.711	-2.056	0.255	2.002	-2.945	-1.113	1.555	-3.387	0.623	-0.296	-1.987	0.046	0.582	-1.019	-1.159	0.759	-0.264	0.849	-0.452	0.658	0.759	-0.713	1.377	-0.601	-0.341	1.43	1.553	-1.392	0.128	0.988	0.214	1.855	-0.953	-1.903	2.328
-0.006	0.406	-2.313	0.66	0.45	0.182	-0.587	-0.809	2.182	-0.252	0.857	-2.862	0.25	-0.015	-1.65	-0.322	0.17	-3.789	0.533	1.649	-3.108	-1.206	1.306	-2.623	1.228	-0.535	-1.902	-0.373	-0.913	-1.5	0.491	0.815	-0.46	0.726	-0.007	0.797	-0.598	-0.426	1.48	1.217	0.701	1.46	1.475	-0.847	0.582	-1.249	0.521	1.551	-0.5	-1.14
1.972	-0.366	0.298	-0.11	1.11	-0.26	-1.947	-0.522	-0.172	2.584	-0.357	0.703	1.28	-0.313	-0.109	2.234	0.051	1.691	3.469	0.262	0.4	2.811	-1.432	0.786	0.711	-1.257	-0.183	1.583	-0.176	-1.188	0.435	1.001	0.233	-0.667	1.097	-0.771	-1.65	-0.15	-0.818	-0.246	1.209	-1.811	-1.348	1.953	-0.558	-2.377	-0.029	-1.55	-2.2	-0.79
-1.769	1.551	-0.232	0.248	0.024	-0.406	1.629	-1.517	0.457	-2.37	1.623	0.184	-1.094	1.415	-0.653	-2.115	2.204	1.129	-2.789	0.682	0.471	-3.094	2.254	-0.354	-0.338	2.206	-0.63	-1.383	1.183	-1.721	-0.365	0.174	-0.026	0.874	-0.117	-0.777	1.901	-0.884	0.023	1.436	0.805	-1.087	0.652	-0.725	-1.683	2.741	-1.228	-0.666	1.319	-2.059
0.231	0.629	2.507	0.036	-0.177	0.005	-0.207	-0.513	-2.528	-0.117	0.852	3.087	0.559	0.379	1.822	-0.955	1.512	2.774	0.505	1.386	3.741	-0.648	0.023	3.553	1.095	-0.507	2.151	1.389	1.049	1.554	-0.357	-0.031	0.643	0.437	-0.304	-0.639	-0.504	-0.428	-1.802	1.016	-1.265	-0.447	1.161	0.473	-0.936	-1.347	-1.168	-1.602	0.136	-0.612
1.765	-1.295	0.91	0.295	0.339	0.109	-1.946	1.085	-0.996	1.735	-1.96	0.703	1.764	-0.526	1.074	2.284	-2.632	1.356	2.128	-2.1	-0.301	0.729	-2.34	0.638	2.802	-0.224	1.264	1.232	-0.43	2.087	1.056	0.435	0.161	-0.472	0.227	0.052	-1.152	1.228	-0.883	-0.854	0.256	1.115	-0.543	-0.717	-0.442	-1.019	2.19	-0.433	-2.66	0.904
0.272	-0.592	-2.512	0.084	0.159	-0.04	-0.299	0.463	2.556	-0.113	-0.722	-3.124	0.638	-0.427	-1.8	-0.856	0.154	-3.25	-0.625	-1.705	-2.949	0.558	-0.833	-4.021	1.361	0.321	-2.082	1.158	-1.308	-1.453	-0.246	0.047	-0.712	0.426	0.25	0.63	-0.563	0.205	1.846	1.041	1.241	0.622	1.022	-0.648	0.874	-1.467	0.801	1.521	0.002	0.711
1.636	-1.984	-0.027	-0.089	-0.094	-0.078	-1.596	2.023	0.066	1.886	-2.513	0.372	1.282	-1.379	-0.414	1.349	-3.447	0.099	1.793	-2.258	1.517	3.013	-2.714	0.176	1.085	-1.781	-1.445	2.186	-0.618	-0.619	0.042	-0.796	0.166	-0.215	0.592	-0.33	-1.42	1.295	0.365	-0.363	0.689	-1.432	0.539	1.431	-0.049	-2.329	0.654	0.419	-1.697	2.666
0.613	0.203	-1.984	-1.107	0.179	-0.126	0.314	-0.199	2.016	1.089	-0.302	-2.24	0.072	0.71	-1.682	1.693	-0.689	-1.437	1.642	0.16	-3.031	0.541	-1.19	-2.642	-0.602	1.323	-2.381	0.579	1.38	-0.965	-1.003	0.001	-0.861	-1.075	0.423	0.587	0.248	0.253	1.384	-1.794	-0.246	1.151	-1.635	1.413	0.663	0.994	-0.127	0.56	0.298	-0.621
2.596	0.271	-0.027	-0.018	-0.129	0.048	-2.624	-0.218	-0.005	3.189	0.348	0.347	1.868	0.183	-0.387	3.393	-0.401	1.138	3.252	1.304	0.953	4.169	0.3	-0.302	2.162	-0.705	-0.997	1.602	0.982	-1.109	0.622	-0.017	0.508	-0.666	-0.26	-0.41	-1.908	-0.262	0.413	-0.499	-1.118	-1.087	-0.773	0.729	-0.991	-1.933	-1.198	0.868	-3.227	-0.181
0.657	-0.165	-2.386	-0.009	0.456	0.127	-0.62	-0.114	2.326	1.101	-0.6	-2.78	0.208	0.276	-1.877	0.618	-0.679	-3.775	1.093	-1.525	-2.306	2.106	-0.161	-2.905	-0.868	0.087	-2.167	0.38	1.379	-2.129	0.464	0.083	-0.354	-0.488	0.832	0.604	-0.444	0.639	2.141	-1.527	0.565	0.267	-0.332	1.993	0.502	0.407	1.094	2.54	-0.769	-0.804
1.893	0.677	1.527	-0.054	-0.097	0.048	-1.84	-0.637	-1.617	2.097	1.276	1.876	1.609	0.045	1.103	1.444	1.562	2.701	2.103	2.234	1.241	3.079	1.109	2.436	1.437	-0.835	1.775	2.363	-0.302	0.39	0.263	0.431	0.456	-0.364	-0.621	-0.383	-1.342	-0.076	-1.368	-0.751	-1.363	0.354	0.414	-1.204	-1.003	-1.887	0.78	-0.905	-2.26	-1.195
-0.071	-2.09	1.661	0.111	-0.137	-0.193	-0.04	2.15	-1.474	-0.422	-2.704	1.839	0.272	-1.425	1.406	0.21	-3.146	2.667	-0.643	-3.378	1.02	-1.442	-2.364	2.242	1.318	-1.58	1.082	0.299	-0.598	2.21	-0.308	-0.718	0.145	0.514	0.465	-0.488	-0.425	1.481	-1.208	1.294	0.071	-1.189	0.997	1.072	0.267	-0.981	0.976	-2.038	0.359	2.71
-0.106	-0.718	1.979	-0.851	-0.406	-0.219	0.736	1.14	-1.683	0.436	-1.166	2.107	-0.724	-0.238	1.767	0.102	-2.187	1.968	0.779	-1.109	3.168	1.314	-1.06	1.38	-0.306	0.775	1.816	-1.516	-0.398	2.565	-1.287	-0.396	0.412	-0.346	-0.332	-0.767	0.235	1.066	-1.06	-0.861	-0.615	-1.736	0.519	-1	-0.693	-0.636	1.67	-1.374	1.18	1.143
1.452	1.734	0.903	-0.619	0.451	-0.051	-0.926	-2.058	-0.871	1.761	1.957	1.528	1.05	1.474	0.253	2.71	2.44	1.27	1.855	1.036	2.113	1.114	2.672	2.132	1.807	0.703	-0.188	0.883	2.248	-0.524	-0.324	0.865	0.545	-0.834	-0.007	-0.644	-0.674	-1.524	-0.308	-0.164	0.355	-1.525	-1.923	0.054	-0.915	0.394	-1.67	-0.054	-1.169	-2.472
-0.089	1.794	1.873	-0.061	-0.009	-0.038	0.057	-1.773	-1.824	-0.38	2.406	2.16	0.149	1.12	1.518	-0.834	3.048	1.366	0.495	2.892	2.582	-1.116	2.066	2.849	0.48	0.355	2.294	1.152	1.355	1.086	-0.573	0.357	0.373	0.435	-0.386	-0.447	-0.391	-1.311	-1.339	1.17	-0.876	0.295	1.104	0.26	-1.069	-1	-1.961	-0.7	0.519	-2.153
-1.59	-0.18	-1.334	-0.333	-0.573	0.91	1.874	0.643	0.58	-2.13	-0.444	-1.736	-1.004	0.072	-0.843	-2.319	0.404	-2.409	-2.996	-0.66	-1.092	-1.841	-1.495	-2.146	-1.292	1.111	-0.615	-0.045	-0.114	-1.457	-0.862	-0.847	0.388	0.247	-0.244	1.323	1.692	-0.098	0.804	0.26	-0.819	2.258	-0.079	0.772	1.685	2.461	-0.289	1.593	1.956	1.324
0.71	-1.959	-1.609	0.088	-0.017	0.044	-0.689	1.921	1.624	0.502	-2.272	-2.201	0.904	-1.564	-0.94	1.226	-3.001	-2.623	0.261	-1.518	-2.946	-0.502	-2.824	-2.214	1.939	-1.123	-1.079	0.8	-2.31	-0.113	-0.116	-0.469	-0.568	0.295	0.431	0.663	-0.791	1.44	0.972	1.291	0.864	0.335	0.371	-0.191	1.627	-0.874	2.117	0.11	-0.513	2.291
-0.657	-0.196	2.219	-0.179	0.113	0.03	0.785	0.072	-2.212	-0.443	0.329	2.695	-0.874	-0.732	1.642	-0.704	-0.035	3.692	-0.876	1.339	2.428	0.701	0.415	2.623	-1.961	-0.902	1.932	-0.393	-1.67	1.634	-0.872	-0.166	0.221	0.525	0.358	-0.163	0.756	0.697	-1.682	1.303	-0.315	0.137	0.674	1.301	0.392	-0.047	1.419	-2.022	0.791	-0.524
0.824	-2.079	-1.319	-0.169	-0.098	0.085	-0.724	2.113	1.276	1.283	-2.667	-1.282	0.335	-1.42	-1.286	1.006	-3.241	-0.396	2.337	-2.211	-1.175	1.288	-3.293	-2.152	-0.696	-1.803	-1.599	0.55	-0.701	-2.103	0.193	-0.762	0.104	-0.533	0.564	0.06	-0.522	1.308	1.35	-1.579	0.492	-0.254	0.052	1.195	-0.634	-1.139	0.744	2.056	-0.924	2.815
1.51	-1.807	-0.237	0.434	0.484	0.637	-1.88	1.347	-0.285	2.159	-2.126	-0.383	0.85	-1.402	-0.039	2.811	-1.504	-1.061	1.794	-3.081	-0.977	2.678	-2.346	0.53	0.127	-1.948	0.683	0.263	-1.196	-0.989	1.068	0.062	0.435	-0.271	0.829	0.75	-1.247	0.875	-0.439	-0.056	1.891	0.951	-0.756	0.261	1.616	-0.732	1.212	-1.364	-2.429	1.781
-0.756	0.069	-2.212	0.886	0.113	-0.163	-0.011	-0.158	2.366	-0.824	0.335	-2.91	-0.62	-0.192	-1.433	-1.531	-0.249	-3.535	0.142	0.268	-3.415	-1.178	1.337	-2.903	-0.601	-1.25	-1.418	-1.421	0.197	-0.747	0.674	0.389	-0.856	0.97	-0.167	0.553	-0.114	0.167	1.606	2.003	0.008	0.906	0.987	-1.298	0.46	-0.218	1.269	1.754	0.146	-0.477
1.75	0.74	1.287	-0.672	0.459	0.241	-1.211	-1.041	-1.589	2.175	0.494	1.815	1.201	0.963	0.721	2.336	-0.654	1.732	1.765	0.755	2.8	3.161	1.02	1.845	1.739	0.737	-0.248	1.217	2.111	0.754	-0.191	0.294	0.804	-1.057	0.608	-0.394	-0.84	-0.327	-1.581	-0.967	1.63	-0.735	-2.145	0.516	-0.253	-1.081	0.236	-2.539	-1.577	-1.657
-0.757	2.207	0.628	0.511	-0.077	0.172	0.471	-2.181	-0.761	-1.413	2.481	0.732	-0.06	1.808	0.507	-1.928	2.085	1.578	-2.017	2.488	-0.176	-1.175	3.58	1.011	0.592	2.066	1.362	0.26	2.297	-0.419	-0.112	0.284	0.473	1.14	-0.431	-0.123	1.017	-1.93	-0.221	1.965	-0.18	0.61	1.36	-0.071	-1.147	1.967	-2.497	-0.127	-0.025	-2.339
-0.539	0.156	2.528	-0.024	0.234	0.006	0.547	-0.303	-2.553	-1.01	0.26	3.053	-0.08	0.065	1.891	-1.175	1.293	3.292	-0.559	-0.246	3.986	-2	-0.251	2.975	0.325	-0.96	1.82	0.862	0.792	1.89	-0.577	0.247	0.502	0.524	0.199	-0.502	-0.004	-0.1	-1.973	1.123	-0.697	-0.157	1.212	1.083	-0.32	-0.734	-0.89	-1.929	1.107	-0.462
2.057	-0.809	1.164	0.245	-0.092	-0.344	-2.19	0.86	-0.969	1.949	-1.002	1.835	2.102	-0.607	0.39	2.863	-0.914	2.505	1.642	-2.054	1.87	1.137	-0.459	2.372	2.983	-1.185	-0.032	2.415	0.472	0.323	0.792	-0.634	-0.48	-0.303	0.449	-0.213	-1.649	0.23	-0.983	0.175	1.492	-0.211	-0.641	0.322	0.815	-1.417	-0.053	-2.019	-2.617	1.464
-0.761	0.168	-2.523	-0.134	0.014	0.061	0.827	-0.184	2.483	-0.522	-0.037	-3.178	-0.98	0.341	-1.743	-0.312	-1.088	-3.284	0.487	0.483	-3.347	-1.14	0.356	-4.081	-2.059	0.01	-1.595	-1.014	1.455	-1.792	0.06	-0.134	-0.692	-0.321	0.177	0.795	0.878	-0.321	1.697	-1.193	-0.487	1.062	-0.644	1.153	1.027	0.926	-1.386	1.5	0.719	-0.032
0.763	-1.794	-1.718	-0.036	-0.017	-0.002	-0.691	1.835	1.748	1.238	-2.355	-1.785	0.279	-1.155	-1.571	0.95	-3.176	-1.119	2.282	-2.152	-1.687	1.153	-2.677	-2.776	-0.784	-1.552	-1.658	0.31	-0.339	-2.322	0.391	-0.658	-0.133	-0.446	0.63	0.128	-0.174	1.263	1.51	-1.476	0.34	0.102	-0.362	1.273	-0.783	-0.263	0.388	2.16	-1.189	2.341
1.416	0.509	-1.56	-0.57	-0.771	-0.373	-0.981	0.14	1.906	1.879	0.365	-2.169	0.879	0.605	-0.91	1.36	0.302	-3.054	2.365	-0.616	-1.99	2.577	1.223	-2.063	0.175	1.336	-1.189	1.473	0.867	0.003	0.11	-0.74	-0.721	-1.201	-0.711	0.056	-1.141	-0.575	1.597	-1.841	-1.577	-0.237	-1.734	0.219	-0.35	-2.142	-0.871	2.005	-0.833	0.805
2.444	-0.73	-0.684	-0.028	-0.033	0.057	-2.425	0.746	0.604	3.121	-0.443	-0.821	1.671	-0.98	-0.529	3.518	0.204	-0.002	3.059	0.05	-1.795	3.738	-1.317	-0.852	1.774	-1.497	0.422	1.268	-1.54	-1.412	0.712	0.185	-0.093	-0.766	-0.243	0.197	-1.726	0.927	0.29	-0.992	-0.874	1.113	-1.08	-0.876	-0.66	-1.218	1.748	0.904	-3.034	0.512
1.426	0.843	-2.052	0.173	0.074	0.131	-1.558	-0.891	1.925	1.333	1.243	-2.646	1.433	0.449	-1.374	2.254	0.936	-3.17	1.575	2.279	-2.437	0.452	1.087	-3.206	2.391	0.503	-0.827	1.478	-0.653	-1.615	0.238	0.646	-0.4	0.106	-0.51	0.642	-1.273	-0.414	1.347	0.892	-0.339	1.453	0.216	-1.429	0.153	-1.315	0.609	1.751	-1.745	-1.351
0.857	-0.157	2.461	0.048	-0.006	-0.005	-0.914	0.134	-2.434	0.969	0.236	3.03	0.691	-0.536	1.799	0.039	0.367	3.658	1.407	1.22	2.772	1.815	-0.205	3.636	0.004	-1.419	1.996	1.662	-0.908	1.346	0.168	0.394	0.649	-0.08	-0.416	-0.655	-0.676	0.491	-1.729	-0.774	-1.217	-0.432	0.836	-0.833	-0.995	-1.665	0.872	-1.299	-1.098	-0.245
-0.622	-1.038	2.357	-0.013	-0.038	-0.034	0.656	1.064	-2.352	-0.57	-0.912	3.076	-0.619	-1.091	1.546	-1.049	-1.859	3.464	-1.152	-0.025	3.419	0.445	-0.865	3.49	-1.711	-1.163	1.256	-0.287	-2.139	1.254	0.141	-0.031	0.721	-0.162	-0.056	-0.796	0.707	0.961	-1.547	-1.248	0.298	-0.865	-0.037	-1.093	-1.165	0.552	1.959	-1.104	0.561	1.101
-0.441	-0.751	1.974	-0.715	-0.451	-0.433	0.979	1.207	-1.59	0.032	-1.272	2.251	-0.957	-0.211	1.603	-0.531	-2.267	2.292	0.353	-0.915	3.218	1.028	-1.391	1.758	-0.567	0.787	1.688	-1.964	-0.203	2.04	-1.237	-0.47	0.12	-0.128	-0.318	-0.906	0.491	1.042	-0.987	-0.576	-0.664	-1.833	0.634	-1.086	-0.672	-0.305	1.788	-0.955	1.399	1.283
1.4	1.967	0.058	-0.717	0.39	0.056	-0.775	-2.275	-0.167	1.685	2.566	0.354	1.024	1.317	-0.242	2.761	2.6	0.087	1.672	2.576	1.455	1.15	3.454	0.078	1.636	0.43	0.042	0.88	1.37	-1.332	-0.285	0.953	0.416	-1.04	-0.222	-0.33	-0.44	-1.605	0.169	-1.018	-0.191	-1.385	-2.098	-0.104	-0.1	0.627	-1.651	0.071	-1.119	-2.831
-0.422	0.069	2.547	0.256	0.209	0.007	0.214	-0.252	-2.591	-0.682	0.445	3.1	-0.135	-0.302	1.872	-0.019	1.321	3.307	-0.76	-0.099	4.086	-1.634	1.009	3.053	-0.829	-1.215	1.61	0.83	-0.744	2.139	-0.059	0.567	0.619	0.539	-0.176	-0.621	-0.072	0.185	-1.972	0.417	-1.243	-0.448	1.618	0.033	-0.6	-1.188	-0.07	-1.909	0.515	-0.672
-1.303	-1.106	-1.285	-0.183	-0.401	0.933	1.528	1.405	0.493	-1.575	-1.667	-1.596	-0.955	-0.535	-0.868	-2.013	-1.17	-2.497	-2.427	-2.137	-1.018	-1.025	-2.499	-1.956	-1.759	0.222	-0.663	-0.198	-0.073	-1.54	-0.414	-0.975	0.423	0.09	0.224	1.309	1.462	0.818	1.049	0.226	-0.09	2.329	-0.676	1.003	1.443	1.787	1.45	1.978	1.519	1.901
0.954	-2.068	-1.238	-0.081	-0.049	-0.004	-0.945	2.074	1.252	1.244	-2.278	-1.855	0.596	-1.786	-0.584	1.938	-1.416	-2.14	0.595	-2.453	-2.749	1.93	-3.134	-1.643	1.357	-1.785	0.144	-0.235	-2.408	-0.255	-0.074	-0.406	-0.701	-0.105	0.305	0.7	-0.837	1.662	0.541	0.888	0.553	1.156	-0.632	-0.418	1.335	-0.175	2.266	-0.208	-1.008	2.396
-0.246	-0.323	2.34	-0.038	0.251	0.029	0.306	0.142	-2.359	0.048	0.098	2.856	-0.567	-0.715	1.717	0.369	-0.756	3.544	-0.838	0.689	3.282	0.935	0.753	2.592	-1.484	-1.113	2.138	0.102	-1.538	1.434	-0.72	0.078	0.375	0.649	0.406	-0.314	0.716	0.65	-1.879	1.308	-0.502	-0.191	1.071	1.349	0.161	0.218	1.618	-2.099	-0.064	-0.356
-0.342	-2.248	-1.142	0.131	0.086	-0.098	0.249	2.204	1.239	-0.038	-2.804	-1.493	-0.624	-1.595	-0.743	0.571	-3.314	-0.71	0.732	-2.485	-2.284	-0.75	-3.575	-1.859	-1.287	-1.922	0.065	-1.253	-1.086	-1.5	0.429	-0.638	-0.14	-0.173	0.802	-0.028	0.703	1.614	0.943	-1.215	0.709	0.333	-0.275	1.387	-1.007	0.969	0.979	1.818	-0.209	2.726
2.034	-0.901	0.852	0.214	0.889	-0.005	-2.203	0.115	-0.813	2.73	-1.07	0.844	1.273	-0.643	0.824	3.015	-1.523	-0.093	2.887	-1.785	1.613	3.358	-0.186	0.906	0.941	-0.554	1.861	0.746	-1.522	0.396	0.934	0.659	0.057	-0.527	0.978	-0.045	-1.443	-0.075	-0.727	-0.525	1.908	-0.644	-1.035	1.289	0.894	-1.024	-0.217	-1.759	-2.869	0.343
-0.262	0.2	-2.364	0.872	-0.03	0.014	-0.468	-0.11	2.338	-0.143	0.438	-3.05	-0.321	-0.011	-1.579	-1.157	0.361	-3.55	0.491	-0.342	-3.602	0.43	1.367	-3.079	-0.469	-1.123	-1.526	-1.311	0.417	-1.233	0.857	0.279	-0.694	0.772	-0.309	0.715	-0.326	0.278	1.666	1.692	-0.288	1.372	0.363	-1.321	0.548	-0.042	1.34	1.974	-0.542	-0.511
2.026	0.123	1.07	-0.306	0.695	0.181	-1.772	-0.808	-1.177	2.533	0.379	1.45	1.384	-0.117	0.681	2.642	1.448	1.139	3.471	-0.193	1.135	2.446	0.308	2.584	1.361	-1.157	0.989	1.808	0.038	-0.38	0.073	0.598	0.837	-0.642	0.649	-0.49	-0.96	-0.602	-1.237	0.155	1.152	-1.089	-1.505	1.359	-0.629	-0.71	-0.341	-2.342	-2.497	-0.942
-0.461	2.328	0.625	0.424	-0.054	0.168	0.161	-2.306	-0.751	-0.986	2.747	0.924	0.089	1.805	0.315	-0.883	2.625	2.063	-2.058	2.439	0.711	-0.807	3.748	0.597	1.092	2.105	0.652	0.037	1.963	-0.764	-0.048	0.355	0.642	0.885	-0.478	-0.309	0.425	-1.932	-0.128	1.994	-0.303	-0.15	0.759	-0.116	-1.347	1.371	-2.435	0.266	-0.078	-2.575
-1.604	-0.001	1.991	0.14	0.184	0.088	1.534	-0.121	-2.108	-2.161	0.322	2.223	-0.952	-0.294	1.654	-2.064	1.375	2.66	-2.51	-0.29	3.064	-3.062	0.364	1.546	-1.304	-1.334	1.404	-0.21	-0.482	2.53	-0.515	0.462	0.378	0.781	-0.125	-0.232	0.939	0.269	-1.673	0.776	-1.181	-0.132	1.655	0.279	0.404	-0.01	0.049	-2.215	2.08	-0.489
1.798	-1.4	0.478	-0.074	-0.15	0.451	-1.787	1.451	-0.73	2.439	-1.128	0.345	1.057	-1.64	0.643	3.167	-1.899	0.168	2.893	-0.472	1.206	2.439	-0.522	-0.593	1.116	-2.392	1.459	0.567	-2.1	-0.247	0.06	-0.578	1.099	-0.232	0.266	-0.19	-1.552	1.028	-0.077	-0.282	-0.345	-1.096	0.557	1.056	-0.377	-2.37	0.382	0.143	-1.929	1.803
-0.381	0.871	-2.483	-0.106	-0.028	0.048	0.407	-0.9	2.444	-0.202	0.749	-3.194	-0.532	0.939	-1.675	-0.906	0.025	-3.582	0.781	0.221	-3.218	-0.266	1.697	-3.763	-1.615	1.102	-1.57	-0.238	1.943	-1.437	0.163	-0.097	-0.687	-0.382	0.037	0.769	0.171	-1.115	1.699	-1.493	0.004	0.873	0.031	1.006	1.138	-0.52	-1.937	1.688	0.58	-0.661
0.096	-1.809	-1.592	-0.423	0.204	-0.133	0.124	1.668	1.651	0.623	-2.334	-1.646	-0.464	-1.211	-1.467	0.66	-2.978	-0.75	1.646	-1.885	-1.724	0.338	-2.988	-2.455	-1.484	-1.654	-1.651	-0.276	-0.397	-2.217	-0.243	-0.509	-0.146	-0.617	0.914	-0.127	-0.594	1.486	1.328	-1.657	0.951	-0.502	0.015	1.565	-0.762	-1.23	2.445	1.434	0.799	1.801
1.392	0.013	-2.103	-0.261	-0.286	-0.066	-1.232	0.134	2.159	2.007	0.335	-2.296	0.706	-0.337	-1.811	2.377	0.1	-3.374	2.737	0.005	-1.615	2.082	1.396	-2.229	0.699	-1.356	-2.187	-0.087	0.252	-2.29	0.498	-0.284	-0.256	-1.009	-0.289	0.138	-1.46	-0.422	1.608	-1.514	-1.173	-0.383	-1.513	0.595	-0.342	-2.589	-0.379	1.751	-0.983	0.654
2.401	-1.035	-0.26	-0.059	-0.089	-0.035	-2.328	1.085	0.225	3.091	-0.854	-0.168	1.624	-1.172	-0.37	3.842	-1.644	-0.26	3.119	-0.615	0.925	3.34	0.087	-0.703	1.298	-1.977	0.421	1.432	-1.544	-1.475	0.672	-0.006	-0.05	-0.785	-0.184	-0.036	-1.521	1.148	0.14	-0.977	-0.871	0.832	-1.135	-0.632	-0.902	-1.092	1.663	0.985	-3.039	0.973
0.717	2.306	-1.075	0.08	-0.029	-0.041	-0.775	-2.278	1.104	0.436	3.001	-1.1	0.947	1.516	-0.999	1.342	3.583	-1.351	0.011	3.331	-0.182	-0.308	3.039	-1.97	1.933	1.59	-0.454	1.204	1.132	-2.034	-0.074	0.705	-0.186	0.242	-0.758	0.111	-0.899	-1.486	0.966	1.191	-0.827	0.535	0.348	-1.262	-0.833	-0.881	-0.976	1.905	-0.6	-2.977
0.174	-1.231	2.211	0.283	0.072	-0.017	-0.42	1.216	-2.171	0.27	-1.189	2.921	0.097	-1.196	1.417	-0.724	-1.021	3.392	1.003	-0.41	3.234	0.517	-2.177	3.264	-0.932	-1.535	1.182	0.793	-1.93	0.974	0.243	0.145	0.741	0.275	-0.003	-0.761	-0.402	1.251	-1.387	-0.327	-0.842	-1.107	1.281	-0.2	-1.205	-1.446	1.375	-1.116	-0.41	1.134
-1.482	-1.377	1.556	-0.086	0.117	0.054	1.526	1.305	-1.572	-1.439	-1.673	2.236	-1.454	-1.026	0.826	-2.395	-2.241	2.369	-1.378	-0.899	2.997	-0.55	-2.334	2.193	-2.336	-0.342	0.771	-1.591	-1.743	0.04	-0.185	-0.23	0.712	0.012	0.455	-0.597	1.364	1.131	-0.822	-0.778	1.206	-0.791	-0.148	-0.332	-1.415	1.453	2.063	-0.204	1.6	1.45
-0.603	-1.204	1.568	-0.874	-0.112	-0.659	1.3	1.374	-0.956	-0.245	-1.836	1.673	-0.991	-0.496	1.384	-0.918	-2.719	1.279	-0.026	-2.037	2.71	0.702	-1.924	1.02	-0.443	0.377	1.92	-1.98	-0.619	1.87	-1.413	-0.228	-0.106	-0.242	0.054	-1.101	0.689	1.13	-0.475	-0.665	0.349	-2.134	0.26	-0.927	-1.244	0.045	2.041	-0.278	1.815	1.541
0.166	2.346	0.594	-0.761	-0.126	0.3	0.431	-2.183	-0.867	0.648	2.729	0.999	-0.361	1.865	0.201	0.413	3.813	0.796	1.693	2.388	0.701	0.485	2.504	2.058	0.077	1.733	-0.809	-1.314	2.46	0.071	-0.632	0.481	0.78	-0.808	-0.685	-0.242	0.459	-1.516	-0.4	-1.339	-0.464	-1.229	-1.6	-1.405	0.248	1.392	-0.845	-0.65	0.33	-2.766
-0.662	0.566	2.479	0.057	-0.033	0.057	0.638	-0.538	-2.504	-0.762	1.15	2.909	-0.524	-0.029	1.952	0.094	1.858	2.894	-0.766	0.677	3.924	-1.725	1.665	2.679	-1.538	-0.46	1.795	0.168	-0.758	2.259	-0.026	0.461	0.633	0.129	-0.528	-0.521	0.585	-0.024	-1.891	-0.867	-0.981	-0.757	0.861	-1.318	-0.198	-0.236	0.737	-2.132	0.678	-1.038
-1.749	-1.392	-0.834	0.319	-0.398	0.286	1.514	1.663	0.631	-2.039	-1.51	-1.467	-1.365	-1.237	-0.172	-3.011	-1.96	-1.229	-1.422	-2.163	-2.029	-2.154	-0.55	-2.021	-1.273	-2.157	0.406	-2.01	-0.548	0.362	0.106	-0.622	-0.421	0.52	-0.162	0.979	1.628	0.902	0.908	0.983	-0.937	1.626	-0.361	0.282	1.505	1.859	1.055	1.984	1.34	2.334
0.226	-1.697	-1.943	0.033	0.133	-0.068	-0.264	1.595	1.985	0.52	-2.348	-2.085	-0.068	-0.975	-1.697	1.598	-2.336	-2.356	0.001	-2.616	-3.075	0.3	-3.023	-1.241	-1.173	-1.105	-1.919	0.4	-0.256	-2.367	0.325	-0.512	-0.315	-0.278	0.762	0.171	0.153	0.998	1.589	-1.316	0.773	0.144	0.082	1.709	-0.415	-0.063	0.13	2.16	-0.67	2.142
-0.058	-0.805	2.191	-0.199	0.184	0.079	0.164	0.643	-2.245	-0.108	-0.424	2.813	-0.051	-1.157	1.472	0.53	-1.069	3.547	-1.16	-0.364	3.13	0.421	0.604	2.733	-0.53	-2.129	1.504	0.956	-1.396	1.207	-0.593	-0.424	0.306	0.209	0.771	-0.153	-0.142	1.124	-1.652	1.327	0.601	-0.044	-0.013	1.543	0.538	-1.237	1.148	-1.738	0.455	0.154
-0.08	-2.636	-0.303	-0.004	-0.006	0.033	0.118	2.605	0.258	0.334	-3.219	-0.317	-0.479	-1.943	-0.276	1.065	-3.255	0.468	0.865	-3.273	-1.269	-0.295	-4.152	-0.206	-1.192	-2.013	0.556	-1.009	-1.811	-1.216	0.3	-0.721	0.142	-0.305	0.69	-0.086	0.443	1.878	0.456	-1.278	0.792	0.514	-0.53	0.827	-1.196	0.363	1.782	1.591	-0.202	3.218
1.582	-0.967	0.903	0.058	1.021	0.56	-1.647	0.035	-1.249	2.018	-1.353	0.461	1.105	-0.499	1.343	1.566	-1.349	-0.514	2.126	-2.302	0.796	2.99	-0.872	0.296	1.539	-0.261	2.364	0.172	-1.018	1.591	0.76	0.873	0.853	-0.66	1.011	0.258	-1.069	-0.137	-0.691	-0.73	2.041	-0.328	-1.355	1.1	1.145	-0.21	-0.307	-1.423	-2.179	0.246
-0.446	0.355	-2.316	0.508	0.7	0.155	-0.03	-0.942	2.182	-0.622	0.662	-2.932	-0.222	0.085	-1.59	-0.976	-0.067	-3.674	0.204	1.229	-3.389	-1.481	1.328	-2.849	0.558	-0.716	-1.817	-1.116	-0.446	-1.164	0.224	1.042	-0.486	0.696	0.264	0.766	-0.373	-0.614	1.518	0.975	1.056	1.497	1.637	-0.399	0.609	-1.266	-0.065	1.831	0.334	-1.206
2.21	-0.127	0.967	0.007	0.787	-0.089	-2.231	-0.573	-0.871	2.785	0.122	1.292	1.541	-0.331	0.617	3.368	0.881	0.713	3.421	-0.704	1.58	2.448	0.496	2.315	1.31	-1.321	1.022	1.64	-0.52	-0.489	0.544	0.816	0.481	-0.529	0.623	-0.63	-1.705	-0.386	-0.252	-0.09	0.444	-1.641	-1.105	1.544	-0.753	-1.291	-1.296	0.201	-2.673	-0.684
0.192	2.615	0.107	-0.022	-0.023	0.043	-0.191	-2.589	-0.154	-0.169	3.272	0.189	0.526	1.855	0.039	-0.92	3.213	0.994	-0.768	3.467	-0.736	0.605	4.089	0.293	1.365	1.772	0.819	0.998	1.779	-0.994	-0.393	0.642	0.194	0.345	-0.703	-0.119	-0.602	-1.874	-0.105	1.085	-0.904	0.666	0.886	-0.496	-1.104	-1.102	-1.891	0.911	0.239	-3.181
-0.772	0.13	2.508	0.026	0.063	-0.025	0.735	-0.229	-2.506	-1.175	0.517	2.986	-0.359	-0.259	1.928	-1.029	1.604	2.818	-0.723	0.281	4.013	-2.249	0.25	2.97	-0.691	-1.289	1.877	0.721	-0.166	2.082	-0.504	0.237	0.485	0.549	-0.149	-0.554	0.142	0.021	-2.023	0.971	-1.177	-0.319	1.264	0.693	-0.248	-0.646	-0.805	-2.18	1.315	-0.466
1.792	-0.631	1.569	-0.209	-0.19	0.293	-1.647	0.722	-1.714	2.348	-0.179	1.516	1.13	-1.069	1.591	3.256	-0.805	1.639	2.3	0.518	2.39	2.457	0.351	0.523	0.955	-1.374	2.613	1.254	-2.009	1.053	-0.141	-0.324	1.051	-0.279	-0.072	-0.466	-1.622	0.45	-0.949	-0.087	-0.934	-1.052	0.414	0.716	-0.705	-2.489	-0.347	-0.906	-1.586	0.95
-0.639	0.329	-2.472	-0.035	-0.339	0.004	0.691	-0.163	2.476	-0.379	0.674	-3.061	-0.856	-0.068	-1.778	0.727	0.436	-3.347	-0.393	1.76	-3.035	-0.953	0.357	-3.952	-1.496	-0.93	-2.048	-1.592	0.629	-1.227	0.208	-0.193	-0.715	-0.264	-0.492	0.72	0.899	-0.156	1.678	-0.783	-1.388	0.994	-1.118	0.307	0.817	1.796	-0.773	1.433	0.439	-0.191
0.071	-2.096	-1.232	-0.366	0.074	0.098	0.128	2.045	1.256	0.596	-2.546	-1.507	-0.458	-1.559	-0.858	0.123	-3.293	-2.16	1.183	-3.169	-0.83	1.334	-2.009	-2.094	-1.357	-2.098	-0.518	-0.88	-0.95	-1.729	0.119	-0.537	0.1	-0.858	0.68	0.108	-0.6	1.637	1.214	-1.883	0.31	0.275	-0.914	1.105	-0.855	-1.411	2.396	1.193	0.793	2.378
1.533	1.486	-1.226	-0.009	-0.214	-0.047	-1.482	-1.428	1.253	1.895	2.117	-1.143	1.117	0.787	-1.227	2.33	2.357	-2.127	2.728	2.157	-0.43	1.089	2.87	-0.83	1.787	-0.036	-1.612	0.378	0.894	-2.104	0.366	0.416	0.144	-0.383	-0.872	-0.239	-0.819	-1.748	0.899	0.444	-1.478	-0.687	-1.219	-0.682	-0.862	-1.171	-2.776	0.581	-2.065	-1.093
2.172	-0.908	1.151	-0.061	0.03	0.084	-2.145	0.89	-1.209	2.82	-0.714	1.282	1.431	-1.042	0.964	3.304	-1.41	1.984	2.786	0.2	1.922	3.506	-0.587	0.461	0.854	-1.563	1.866	1.516	-1.884	0.206	0.641	0.21	0.308	-0.757	-0.153	-0.147	-1.439	1.092	-0.856	-1.489	-0.308	0.747	-0.664	-1.079	-0.8	-1.489	1.955	-0.153	-2.781	0.636
0.655	2.496	-0.302	-0.003	0.008	0.082	-0.677	-2.501	0.219	0.52	3.174	-0.095	0.749	1.702	-0.482	1.117	3.787	-0.708	0.744	3.392	0.981	-0.522	3.454	-0.318	1.786	1.548	-0.23	0.64	1.676	-1.552	-0.139	0.728	0.291	0.115	-0.711	-0.135	-0.859	-1.748	0.407	1.163	-1.06	0.188	0.066	-0.764	-1.276	-1.015	-1.675	1.62	-0.452	-3.138
-0.085	-1.824	1.88	0.203	-0.06	-0.133	-0.024	1.862	-1.807	-0.075	-1.913	2.597	-0.074	-1.641	1.086	-0.675	-1.249	3.218	0.986	-1.829	3.04	-0.477	-2.948	2.776	-1.1	-1.765	0.684	0.579	-2.437	0.606	0.303	-0.157	0.642	0.091	0.045	-0.899	0.315	1.502	-1.166	-0.974	-0.31	-1.076	0.813	-0.525	-1.477	-0.23	2.119	-0.448	-0.332	2.114
-0.976	-1.533	1.914	-0.029	0.244	0.147	0.992	1.356	-1.975	-0.864	-1.9	2.527	-1.022	-1.069	1.239	-1.635	-2.646	2.587	-0.831	-1.392	3.535	0.047	-2.504	2.506	-2.036	-0.55	1.319	-1.188	-1.718	0.365	0.1	-0.059	0.83	-0.168	0.51	-0.523	1.102	1.017	-1.273	-0.782	1.402	-0.636	-0.525	-0.24	-1.266	1.675	1.749	-0.676	0.823	1.657
-1.074	-1.531	0.956	-0.833	0.586	-0.269	1.683	1.064	-0.645	-0.938	-2.146	0.583	-1.238	-0.797	1.302	-1.654	-2.462	-0.171	-0.905	-2.939	1.371	0.051	-2.085	0.106	-0.353	-0.683	1.952	-2.165	-0.916	1.848	-1.329	0.439	0.333	-0.267	0.66	-0.774	1.083	1.001	-0.122	-0.492	1.56	-1.323	-0.131	-0.122	-1.503	1.02	1.945	0.453	2.174	1.102
-0.696	0.755	2.077	-0.615	-0.648	-0.173	1.302	-0.168	-1.973	-1.041	0.741	2.717	-0.339	0.71	1.334	-0.831	1.699	3.238	-0.796	-0.003	3.465	-2.176	0.596	2.645	0.762	0.565	1.6	-0.595	1.62	0.659	-0.72	-0.619	0.577	-0.395	-0.579	-0.908	1.039	-0.135	-1.201	-0.991	0.127	-1.444	-0.683	-1.611	-1.331	1.094	0.909	-0.775	1.487	-0.22
-0.243	1.346	2.197	-0.025	-0.158	0.075	0.312	-1.203	-2.254	-0.732	1.674	2.618	0.239	0.956	1.682	-1.19	2.579	2.174	-0.128	2.046	3.456	-1.555	1.072	3.015	0.735	0.127	2.191	0.994	1.64	1.281	-0.473	0.296	0.499	0.447	-0.591	-0.362	-0.109	-0.696	-1.791	0.47	-1.586	0.176	1.46	-0.089	-0.332	-1.13	-1.224	-1.809	0.745	-1.663
-2.049	-1.109	0.594	0.33	-0.204	0.322	1.798	1.244	-0.751	-2.648	-1.227	0.157	-1.363	-0.962	1.024	-3.494	-1.61	0.748	-2.271	-1.96	-0.663	-2.912	-0.23	-0.355	-1.061	-1.942	1.538	-1.529	-0.147	1.776	-0.24	-0.586	-0.005	0.886	0.194	0.666	1.958	0.563	-0.354	1.397	-0.552	1.367	0.545	1.183	1.063	2.92	0.705	0.217	1.587	1.853
0.769	-1.501	-2.027	-0.081	0.047	-0.041	-0.703	1.525	2.004	1.113	-2.113	-2.169	0.401	-0.821	-1.799	2.196	-2.02	-1.994	0.967	-2.572	-3.163	0.746	-2.904	-1.494	-0.585	-0.9	-2.195	0.793	0.078	-2.309	0.356	-0.589	-0.298	-0.502	0.689	0.203	-0.257	0.951	1.657	-1.6	0.549	-0.004	-0.095	1.514	-0.424	-0.463	-0.055	2.25	-1.144	2.069
-0.879	-0.028	2.141	-0.034	0.06	-0.016	0.911	-0.01	-2.151	-0.641	0.443	2.615	-1.133	-0.508	1.548	-0.946	0.234	3.65	-0.974	1.435	2.371	0.506	0.511	2.643	-2.169	-0.782	1.622	-0.614	-1.432	1.834	-0.762	-0.154	0.114	0.701	0.274	-0.149	1.106	0.578	-1.621	1.348	-0.516	0.189	0.937	1.28	0.358	0.516	1.516	-1.915	0.728	-0.579
-1.321	-1.812	-1.324	0.003	0.021	-0.079	1.285	1.837	1.325	-1.23	-2.464	-1.62	-1.343	-1.081	-1.004	-0.452	-3.044	-1.098	-1.008	-2.394	-2.67	-2.222	-2.998	-1.568	-1.873	-1.18	0.026	-1.891	-0.395	-1.616	0.072	-0.476	-0.714	-0.071	0.537	0.528	1.225	1.294	0.71	-0.281	-0.07	1.437	-0.96	1.233	0.393	2.072	0.647	0.873	1.258	2.31
1.096	0.108	1.67	-0.108	1.156	-0.277	-0.997	-1.051	-1.433	1.576	-0.408	1.647	0.563	0.689	1.602	1.277	-1.333	1.182	1.775	-0.724	2.663	2.574	0.021	1.276	0.87	1.48	2.274	-0.392	0.331	2.034	0.448	1.423	0.18	-0.642	0.766	-0.676	-0.417	-0.714	-1.045	-0.745	1.356	-1.614	-1.551	0.824	-0.086	0.534	-0.726	-1.518	-1.542	-1.299
-0.303	0.276	-2.336	0.843	0.396	0.089	-0.402	-0.568	2.247	-0.379	0.635	-2.946	-0.174	-0.064	-1.647	-0.906	0.06	-3.561	0.597	0.761	-3.412	-0.988	1.641	-2.744	0.341	-1.031	-1.776	-1.192	-0.276	-1.133	0.682	0.73	-0.569	0.884	0.025	0.743	-0.375	-0.056	1.62	1.734	0.369	1.318	1.196	-0.98	0.575	-0.744	0.889	2.084	-0.351	-1.031
1.866	-0.959	1.261	0.056	0.778	0.335	-1.909	0.251	-1.571	2.222	-1.127	1.875	1.416	-0.705	0.622	2.919	-0.334	2.127	2.892	-1.992	1.621	1.671	-1.452	2.786	0.909	-1.614	0.265	2.076	-0.425	-0.198	0.504	0.459	0.915	-0.401	0.961	-0.294	-1.316	-0.049	-1.063	0.335	1.187	-1.088	-0.903	1.959	0.057	-0.836	-0.888	-1.524	-2.394	0.576
-0.813	2.47	-0.225	-0.049	-0.045	-0.033	0.868	-2.437	0.217	-1.298	2.902	-0.511	-0.299	1.934	0.051	-2.251	2.488	-0.298	-1.125	3.022	-1.584	-1.322	3.933	-0.034	-0.491	1.851	1.124	0.785	2.297	-0.201	-0.475	0.469	-0.464	0.383	-0.555	0.384	0.274	-2	-0.107	-0.016	-0.427	1.461	1.471	-0.225	0.449	-0.739	-2.311	0.192	1.436	-2.777
-1.364	-0.586	2.18	0.116	0.027	0.033	1.268	0.474	-2.277	-1.878	-0.301	2.635	-0.805	-0.839	1.62	-1.788	0.786	2.668	-1.685	-0.732	3.679	-2.943	-0.57	2.256	-1.014	-1.918	1.311	0.087	-0.886	2.225	-0.55	0.113	0.407	0.769	-0.098	-0.376	0.661	0.562	-1.765	1.075	-1.149	-0.258	1.559	0.428	0.226	-0.273	0.309	-2.278	1.848	0.334
1.285	-1.022	1.779	-0.253	-0.106	0.218	-1.121	1.033	-1.918	1.871	-0.64	1.988	0.599	-1.378	1.516	2.629	-1.307	2.523	1.64	0.02	2.784	2.348	-0.054	1.107	0.067	-1.864	2.341	0.935	-2.201	0.787	-0.5	-0.451	0.855	-0.017	0.209	-0.424	-1.207	0.684	-1.214	0.622	-0.504	-1.013	0.613	1.16	-0.176	-1.863	-0.181	-1.405	-0.959	1.336
-1.156	0.08	-2.283	0.081	0.046	-0.027	1.153	-0.072	2.316	-1.194	-0.297	-2.92	-1.024	0.445	-1.555	-1.536	-1.407	-2.843	-0.345	-0.186	-3.544	-2.002	0.273	-3.401	-1.99	0.302	-0.989	-1.033	1.558	-1.73	0.208	0.028	-0.801	-0.042	0.094	0.746	1.201	0.165	1.555	-0.535	-0.878	1.045	-0.77	0.925	1.02	1.89	-0.508	0.98	1.049	-0.297
-0.248	-1.913	-1.434	0.079	-0.124	0.348	0.187	1.991	1.213	-0.089	-2.085	-2.154	-0.391	-1.643	-0.663	-0.919	-2.664	-2.564	0.862	-2.726	-2.103	0.078	-1.207	-2.779	0.006	-2.495	-0.015	-1.452	-1.652	-0.306	0.445	-0.37	-0.299	-0.281	0.115	0.994	0.204	1.365	1.715	-0.223	-0.662	1.839	-1.373	0.414	0.694	-0.478	1.539	2.607	0.152	2.509
1.26	1.295	-1.531	-0.015	-0.611	-0.281	-1.286	-0.872	1.691	1.829	1.723	-1.496	0.647	0.792	-1.513	1.914	2.163	-2.45	2.786	1.062	-1.266	1.79	2.511	-0.683	0.576	0.187	-2.479	-0.244	1.45	-1.404	0.585	-0.141	-0.284	-0.624	-1.055	-0.274	-0.99	-1.418	1.213	-0.443	-1.98	-0.868	-1.557	-0.514	-0.683	-1.744	-2.25	1.091	-1.554	-0.342
2.225	-1.218	0.226	0.074	0.059	-0.009	-2.25	1.217	-0.171	2.914	-1.12	0.282	1.455	-1.241	0.171	3.345	-2.13	0.376	3.273	-0.371	1.015	3.181	-0.738	-0.698	1.041	-1.812	1.072	1.255	-1.945	-0.643	0.819	0.114	-0.085	-0.682	0.016	0.065	-1.445	1.31	-0.106	-0.963	-0.512	0.987	-0.891	-0.785	-0.705	-1.221	2.067	0.597	-2.939	1.068
-0.544	2.342	1.031	0.069	0.007	-0.011	0.539	-2.332	-1.029	-0.455	2.818	1.575	-0.577	1.764	0.461	-1.285	3.569	1.613	0.553	3.286	1.51	-0.659	2.299	2.531	-0.34	2.285	-0.533	-1.641	1.482	0.332	0.195	0.464	0.593	-0.073	-0.448	-0.623	0.632	-1.82	-0.413	0.404	0.052	-1.422	-1.159	-0.628	-0.801	1.608	-1.713	-0.047	0.443	-2.737
-0.034	-1.968	1.713	-0.095	-0.109	-0.163	0.135	2.027	-1.588	0.347	-2.459	2.099	-0.379	-1.423	1.238	1.311	-2.012	2.454	0.468	-3.346	1.499	-0.302	-2.805	2.95	-0.73	-0.511	1.885	-1.34	-1.828	0.828	0.311	-0.68	0.113	-0.481	0.477	-0.428	0.452	1.395	-1.212	-0.968	1.004	0.385	-1.334	0.099	-1.029	1.283	1.754	-0.536	-0.226	2.565
-0.564	-1.698	1.954	0.088	-0.062	-0.037	0.503	1.73	-1.943	-0.848	-1.702	2.633	-0.262	-1.611	1.187	-1.162	-2.712	2.887	-1.637	-0.889	2.805	-0.033	-1.411	3.327	-0.878	-2.236	0.588	0.679	-2.231	1.198	-0.084	-0.163	0.724	0.263	0.044	-0.787	0.394	1.563	-1.192	-0.545	-0.421	-1.392	1.16	-0.537	-0.99	-0.434	2.188	-0.727	0.601	1.796
-0.456	-1.845	-0.902	-0.973	0.284	-0.033	1.233	1.502	1.006	-0.061	-1.842	-1.537	-0.903	-1.771	-0.218	-0.56	-1.302	-2.328	0.068	-2.942	-1.777	0.957	-1.454	-1.361	-0.29	-1.971	0.713	-1.843	-2.455	-0.352	-1.475	-0.319	0.034	-0.369	0.791	-0.047	0.799	0.815	0.967	-0.923	1.746	0.126	0.026	0.796	-1.08	0.528	0.628	2.022	1.58	2.146
-0.92	1.386	1.758	0.552	-0.432	0.511	0.489	-0.995	-2.15	-0.868	1.894	2.282	-0.895	0.809	1.201	-1.895	2.224	2.298	-0.114	2.692	2.015	-0.653	1.496	3.283	-1.206	1.309	0.231	-1.654	0.04	1.369	0.488	0.159	1.022	0.543	-0.958	-0.056	0.496	-0.426	-1.524	-0.345	-1.574	0.084	1.43	-1.65	-0.039	-0.549	0.15	-1.618	0.504	-1.545
0.595	1.343	1.805	-0.293	0.46	-0.118	-0.464	-1.617	-1.661	0.851	0.919	2.279	0.25	1.76	1.243	0.116	0.234	2.741	1.412	1.476	3.029	1.638	0.31	1.814	1.146	2.178	0.73	-0.297	2.597	1.76	-0.643	1.082	0.141	0.06	-0.162	-0.365	-0.859	-1.024	-1.247	0.398	-0.877	0.421	0.901	0.13	-0.944	-1.652	-1.521	-0.72	-0.064	-2.126
-2.215	-0.058	1.169	0.134	-0.417	-0.054	2.165	0.314	-1.114	-2.932	0.143	1.096	-1.398	-0.258	1.164	-3.243	0.198	0.044	-3.119	1.109	1.591	-3.541	-0.57	1.601	-1.355	-1.295	1.461	-1.007	0.275	2.059	-0.516	-0.029	-0.076	0.806	-0.794	-0.019	1.825	-0.431	-1.11	0.534	-1.895	-0.216	1.278	-0.62	0.982	2.605	-1.153	-1.155	2.425	0.984
0.216	-2.331	-1.13	0.014	-0.066	0.17	-0.243	2.407	1.068	0.408	-3.033	-1.069	0.015	-1.555	-1.103	1.516	-3.078	-0.954	0.13	-3.473	-2.029	-0.174	-3.465	-0.254	-0.971	-1.431	-1.644	0.695	-1.093	-1.809	0.146	-0.798	0.263	-0.117	0.68	0.084	-0.157	1.647	1.263	-1.057	0.827	-0.534	0.733	1.049	-0.554	-0.957	1.175	1.806	-0.331	3.091
-1.159	0.582	1.941	-0.019	0.11	0.014	1.152	-0.661	-1.936	-0.904	0.252	2.537	-1.372	0.92	1.247	-1.731	0.411	3.371	0.119	0.684	2.801	-0.836	-0.861	2.384	-1.485	2.04	1.431	-2.369	0.537	0.881	-0.21	0.84	0.186	0.179	-0.617	-0.16	1.331	-0.719	-1.164	-0.75	-1.114	-0.452	0.566	-1.301	0.687	2.13	0.098	-0.943	0.909	-0.605
0.219	-2.426	-0.894	-0.051	-0.04	0.003	-0.149	2.432	0.944	-0.151	-3.013	-1.014	0.567	-1.73	-0.732	-0.755	-3.106	-1.956	-0.813	-3.318	-0.212	0.579	-3.844	-1.047	0.904	-1.295	-1.708	1.441	-1.868	-0.066	-0.419	-0.668	-0.145	0.323	0.576	0.177	-0.482	1.689	0.837	0.576	1.014	-0.799	1.264	0.343	0.785	-1.409	1.954	0.236	0.216	3.061
1.128	-1.551	1.33	0.375	0.842	0.406	-1.383	0.841	-1.714	1.52	-1.897	1.851	0.735	-1.11	0.773	2.582	-1.641	1.708	1.317	-2.981	1.768	1.189	-1.485	2.764	-0.385	-1.274	1.06	0.968	-1.497	-0.243	0.903	0.39	0.763	-0.185	1.183	-0.03	-0.703	0.509	-1.375	0.078	2.227	-0.206	-1.151	1.202	0.65	0.071	0.54	-2.17	-1.985	1.196
-0.923	-0.446	-2.166	0.722	0.413	-0.269	0.274	0.114	2.388	-1.137	-0.343	-2.85	-0.641	-0.491	-1.421	-1.777	-1.202	-3.029	-0.326	-0.355	-3.633	-1.637	0.616	-2.865	-0.17	-1.445	-1.318	-1.521	-0.545	-0.71	0.37	0.54	-0.946	0.95	0.237	0.46	-0.016	0.24	1.637	1.826	0.942	0.634	1.387	-0.793	0.324	-0.507	1.235	1.771	0.6	-0.008
1.903	-0.761	1.027	-0.153	0.736	0.538	-1.759	0.138	-1.415	2.205	-1.211	1.506	1.527	-0.26	0.564	2.472	-0.605	2.438	3.054	-1.665	0.881	1.421	-1.952	1.72	1.243	-0.799	-0.383	2.207	0.592	0.296	0.255	0.354	1.07	-0.54	1.032	-0.039	-1.449	-0.015	-0.697	0.188	1.434	-0.776	-1.123	1.937	0.21	-0.758	-0.856	-0.787	-2.007	0.327
-0.035	2.299	-1.091	0.113	0.055	0.091	-0.06	-2.325	1.005	0.27	2.658	-1.626	-0.33	1.829	-0.524	0.067	2.25	-2.609	1.389	2.703	-1.551	-0.108	3.703	-1.502	-1.474	1.844	-0.673	-0.162	2.331	0.509	0.308	0.476	-0.542	-0.083	-0.35	0.725	0.252	-1.83	0.451	-1.21	-0.397	0.724	0.373	-0.001	1.659	-0.015	-2.305	-0.524	-0.381	-2.71
-0.625	-0.13	2.485	-0.01	0.063	-0.045	0.644	0.063	-2.502	-1.129	-0.126	3.01	-0.112	-0.15	1.84	-1.509	1.006	2.97	-0.777	-0.284	3.991	-1.953	-0.789	2.771	0.47	-1.103	2.005	0.542	0.697	2.12	-0.62	0.04	0.37	0.603	0.101	-0.482	0.197	0.348	-1.921	1.104	-0.864	-0.487	1.368	0.827	-0.115	-0.87	0.031	-2.013	1.085	-0.228
1.147	-1.402	1.57	-0.254	0.126	0.387	-0.99	1.349	-1.816	1.741	-1.673	1.259	0.478	-1.044	1.866	2.175	-2.504	1.938	2.541	-0.854	1.149	1.617	-1.995	0.18	0.583	-0.824	2.972	-0.294	-1.879	1.795	-0.107	0.232	1.118	-0.393	0.033	-0.362	-0.67	1.346	-1.065	-1.118	-0.789	-0.416	0.531	-0.385	-0.828	-1.352	1.969	-0.453	-1.282	1.286
-0.549	-0.131	-2.486	0.023	-0.039	-0.001	0.536	0.201	2.575	-0.395	-0.458	-3.107	-0.665	0.213	-1.751	-0.517	-1.517	-2.819	0.643	-0.281	-3.473	-1.079	-0.269	-4.033	-1.749	-0.054	-1.535	-0.504	1.263	-1.941	0.287	-0.242	-0.662	-0.223	0.172	0.689	0.682	-0.156	1.881	-1.243	-0.261	0.843	-0.378	1.249	0.59	0.68	-1.232	1.919	0.339	0.554
0.97	-0.768	-2.049	-0.441	-0.196	0.031	-0.672	0.843	2.011	1.486	-0.487	-2.492	0.413	-1.038	-1.533	1.09	0.523	-2.713	1.507	-1.069	-3.355	2.521	-0.318	-2.005	0.831	-1.929	-1.089	-0.625	-1.18	-1.97	0.158	0.079	-0.389	-1.039	-0.474	0.459	-0.875	0.061	1.914	-0.824	-1.601	0.537	-2.094	-0.291	0.104	-1.889	-0.051	2.383	-0.479	1.557
1.474	1.486	-1.347	-0.337	-0.214	-0.357	-1.334	-1.355	1.517	2.129	1.729	-1.289	0.743	1.162	-1.372	2.328	2.719	-1.804	2.968	0.991	-1.417	2.352	2.03	-0.292	0.646	0.687	-2.357	-0.018	1.964	-1.254	0.375	-0.051	-0.415	-1.063	-0.389	-0.31	-1.275	-1.518	0.731	-1.532	-0.595	-1.312	-1.572	0.522	0.099	-2.181	-2.067	0.369	-1.399	-1.132
2.231	-1.123	-0.667	0.058	0.033	0.136	-2.278	1.102	0.567	2.903	-0.968	-0.909	1.481	-1.206	-0.383	3.329	-1.934	-1.217	3.505	-0.512	-0.151	2.949	-0.532	-1.889	1.55	-1.841	0.565	0.768	-1.671	-1.152	0.701	0.084	-0.222	-0.596	-0.03	0.472	-1.522	1.124	0.313	-0.237	-0.289	1.495	-1.236	-0.879	0.107	-0.935	1.962	0.773	-2.941	1.024
-1.069	2.388	0.433	0.066	0.046	-0.101	1.076	-2.366	-0.367	-0.971	3.048	0.795	-1.09	1.649	0.071	-1.837	3.649	0.379	-0.052	3.547	0.494	-1.053	2.819	1.859	-1.288	1.768	-1.027	-2.028	1.093	0.476	0.131	0.735	0.258	0.022	-0.644	-0.471	1.174	-1.606	-0.088	-0.212	-0.545	-1.55	-0.897	-1.121	0.019	2.131	-1.17	-0.457	0.921	-3.006
-0.132	-1.918	1.695	-0.01	0.054	0.048	0.124	1.895	-1.722	-0.558	-2.478	1.842	0.29	-1.269	1.466	-0.387	-3.309	1.184	-1.659	-2.263	1.877	-0.23	-2.862	2.84	1.328	-1.635	1.183	0.329	-0.569	2.368	-0.353	-0.584	0.275	0.333	0.691	-0.179	-0.248	1.26	-1.439	1.462	0.514	-0.33	0.242	1.479	0.65	-0.146	0.511	-2.258	0.488	2.459
1.308	-1.872	1.272	-0.125	-0.093	0.007	-1.196	1.929	-1.249	1.406	-2.188	1.902	1.142	-1.474	0.607	2.138	-3.031	1.773	0.463	-2.696	2.251	1.817	-1.472	2.645	0.92	-2.222	-0.155	2.033	-0.917	0.251	-0.047	-0.477	0.65	-0.179	0.284	-0.628	-1.12	1.516	-0.572	-0.608	-0.363	-1.426	0.788	0.734	-0.919	-2.095	1.133	-0.184	-1.222	2.254
0	-1.733	-1.635	-0.421	-0.429	0.379	0.227	2.018	1.336	0.239	-1.432	-2.257	-0.293	-1.998	-0.924	-0.548	-1.253	-3.029	0.922	-2.13	-2.741	0.688	-0.453	-2.08	0.591	-2.416	-0.28	-1.01	-2.831	-1.11	-0.933	-0.901	-0.011	0.091	0.065	0.745	-0.345	1.464	1.039	0.978	0.216	0.039	0.59	-0.501	1.565	-0.835	1.991	0.2	0.767	2.463
-1.281	1.829	0.678	-0.602	-0.592	0.062	1.809	-1.3	-0.787	-1.687	2.157	1.132	-0.861	1.387	0.199	-1.553	3.267	1.02	-1.28	2.032	2.177	-2.727	1.912	1.17	0.136	1.834	0.215	-1.156	1.475	-0.9	-0.906	-0.077	0.504	-0.196	-1.003	-0.412	1.359	-0.755	-0.361	-0.557	-0.938	-1.398	-0.475	-2.01	-0.025	1.645	0.231	-0.755	2.15	-1.82
0.695	1.693	1.139	-0.444	0.556	-0.576	-0.366	-2.081	-0.634	0.997	1.359	1.721	0.321	2.002	0.48	0.416	0.636	2.304	1.274	2.196	2.334	1.868	0.72	1.372	1.036	2.392	-0.269	-0.262	2.836	0.864	-0.688	1.198	-0.248	-0.172	-0.124	-0.818	-0.575	-1.458	-0.187	0.993	-0.018	-0.755	-0.377	-0.132	-1.948	-0.18	-1.701	0.841	-0.149	-2.584
-2.088	1.303	-0.058	0.005	-0.252	-0.33	2.087	-1.146	0.267	-2.307	1.983	-0.02	-1.766	0.566	-0.114	-1.829	2.72	-0.695	-2.163	2.323	1.03	-3.34	2.014	-0.331	-2.301	0.042	-0.963	-2.027	0.094	0.896	-0.208	0.467	-0.225	0.212	-0.962	-0.418	1.714	-1.167	-0.481	-0.18	-1.397	-1.339	-0.145	-1.716	0.368	1.934	-2.146	-0.974	2.365	-1.114
-1.594	-1.874	0.712	-0.113	0.017	-0.253	1.686	1.928	-0.584	-2.238	-2.107	0.954	-0.909	-1.544	0.408	-2.359	-1.637	1.963	-2.301	-3.215	1.106	-3.107	-1.819	0.372	-0.465	-2.226	-0.404	-0.243	-1.634	1.258	-0.826	-0.155	-0.16	0.612	0.212	-0.352	0.931	1.764	-0.46	1.12	-0.431	-1.118	1.179	-0.193	0.548	0.375	2.185	-1.247	2.383	2.016
0.255	1.023	2.169	-0.169	0.014	-0.019	-0.108	-1.056	-2.146	0.75	0.816	2.641	-0.264	1.21	1.578	0.456	1.252	3.612	1.67	1.3	2.32	0.916	-0.282	2.867	-0.231	2.322	1.545	-1.239	0.763	1.923	-0.067	0.757	0.117	-0.25	-0.734	-0.151	0.33	-1.133	-1.496	-1.293	-0.931	0.011	0.286	-1.357	0.61	1.296	-0.658	-1.776	-0.541	-0.966
-1.42	-2.123	0.228	-0.047	-0.001	0.042	1.444	2.142	-0.253	-1.442	-2.766	0.544	-1.321	-1.385	-0.08	-1.401	-2.811	1.682	-0.665	-3.479	0.163	-2.423	-3.145	0.249	-2.194	-0.735	0.116	-1.319	-1.576	-1.174	-0.026	-0.732	0.26	-0.069	0.721	-0.181	1.354	1.425	0.006	-0.804	1.28	0.438	-0.448	0.87	-1.195	1.664	1.334	1.066	1.448	2.786
0.534	-1.854	1.265	0.779	0.466	-0.011	-1.236	1.43	-1.314	0.914	-2.46	1.436	0.16	-1.158	1.011	1.143	-3.095	0.621	0.363	-2.979	2.258	1.919	-2.183	1.947	-0.058	-0.696	2.003	-0.777	-1.397	0.48	1.054	-0.217	0.168	0.383	1.079	-0.216	-0.759	0.789	-1.188	1.122	1.822	-0.537	-0.019	1.512	0.733	-0.394	0.624	-2.188	-1.623	2.034
-0.146	-1.402	-1.878	0.745	0.431	-0.158	-0.54	1.087	2.048	-0.035	-1.659	-2.553	-0.213	-1.052	-1.126	-0.859	-2.418	-2.708	0.941	-2.079	-2.786	-0.076	-0.897	-3.383	0.078	-1.871	-0.431	-1.361	-0.857	-1.006	0.626	0.267	-0.888	0.745	0.549	0.586	-0.599	0.934	1.241	1.554	1.328	0.806	1.032	-0.396	1.119	-0.94	1.838	0.764	-0.44	1.228
-0.179	-2.238	0.641	0.813	0.182	0.29	-0.539	2.077	-0.881	-0.137	-2.821	1.049	-0.183	-1.555	0.234	0.897	-3.222	1.113	-0.828	-3.558	0.527	-0.429	-2.553	2.141	-1.221	-1.258	0.141	0.24	-1.788	-0.71	0.681	-0.403	0.753	0.824	0.732	-0.222	-0.588	1.373	-0.523	1.357	0.497	-1.179	1.419	1.519	0.356	-1.112	0.608	-1.171	-0.42	2.715
-0.876	1.617	-1.9	-0.012	-0.089	-0.134	0.823	-1.549	1.967	-0.749	1.938	-2.518	-0.956	1.22	-1.232	-0.789	1.275	-3.43	0.206	2.425	-2.533	-1.515	2.657	-2.644	-1.918	0.756	-1.141	-0.918	1.891	-0.362	0.084	0.16	-0.852	-0.127	-0.337	0.581	0.877	-1.347	1.175	-1.045	-0.86	0.621	0.059	0.508	1.299	0.837	-2.332	0.626	0.703	-1.68
-1.379	-0.271	2.095	0.224	-0.198	0.102	1.247	0.507	-2.188	-1.456	-0.312	2.807	-1.212	-0.185	1.318	-0.594	-0.655	3.323	-2.168	-1.169	2.941	-1.745	0.596	3.275	-1.836	0.548	0.867	-1.629	-1.195	0.84	0.217	-0.108	0.865	0.232	-0.262	-0.672	1.426	0.358	-1.418	-0.713	0.146	-1.058	0.035	-1.301	-0.839	1.688	1.256	-0.859	1.016	0.627
0.129	-1.35	1.994	-0.367	-0.255	-0.053	0.083	1.492	-1.963	0.692	-1.109	2.396	-0.492	-1.565	1.499	0.835	-1.738	3.322	0.581	0.048	2.613	1.682	-1.151	1.856	-1.493	-1.602	2.135	-0.26	-2.603	1.161	-0.906	-0.558	0.417	0.177	0.045	-0.509	-0.455	1.057	-1.596	0.614	-0.744	-1.113	0.989	0.566	0.063	-0.981	0.455	-2.354	0.61	1.854
-1.841	-0.812	-1.526	0.064	-0.024	-0.099	1.834	0.892	1.616	-2.04	-1.333	-1.964	-1.546	-0.247	-1.029	-2.13	-2.405	-1.481	-1.256	-1.437	-2.805	-3.053	-1.213	-2.395	-2.311	-0.326	-0.233	-1.601	0.794	-1.426	-0.079	-0.517	-0.637	0.232	0.482	0.453	1.689	0.436	0.955	-0.492	0.355	1.318	-0.039	1.427	-0.095	1.901	-0.636	1.23	1.89	1.329
1.675	0.035	-1.799	0.019	-0.371	0.179	-1.63	0.165	1.721	1.836	0.522	-2.311	1.456	-0.454	-1.204	0.913	0.706	-2.894	2.65	0.14	-2.994	2.017	1.555	-1.956	2.329	-0.752	-0.522	1.151	-1.431	-1.635	0.262	0.121	-0.341	-0.207	-0.868	0.719	-0.991	-0.33	1.858	0.675	-1.378	1.18	-0.801	-1.591	0.139	-1.327	-1.12	2.577	-2.189	0.592
0.743	1.889	-1.366	0.174	-0.395	-0.214	-0.79	-1.66	1.497	0.627	2.58	-1.321	0.852	1.113	-1.336	0.799	3.104	-2.36	1.118	3.004	-0.472	-0.484	2.678	-1.269	1.92	0.882	-1.262	0.457	0.782	-2.363	0.15	0.363	-0.205	0.216	-1.154	-0.226	-0.157	-1.939	1.055	1.294	-1.408	-0.455	-0.446	-1.654	-0.966	-0.389	-2.997	0.879	-1.367	-1.365
2.092	-1.413	-0.794	0.044	0.036	-0.093	-2.124	1.391	0.817	2.817	-1.387	-0.836	1.268	-1.353	-0.731	3.211	-2.39	-0.751	3.319	-0.918	0.026	3.307	-0.976	-1.723	0.972	-2.154	0.01	0.821	-1.65	-1.775	0.843	0.045	-0.143	-0.75	0.037	-0.048	-1.36	1.375	0.516	-1.248	-0.854	0.541	-1.093	-0.116	-1.042	-0.903	1.718	1.449	-2.793	1.316
-0.011	2.245	1.387	-0.034	-0.032	-0.065	0.04	-2.266	-1.399	0.407	2.637	1.844	-0.421	1.744	0.86	-0.249	3.358	2.394	1.156	3.292	1.311	0.925	2.086	2.642	-0.674	2.373	-0.004	-1.306	1.403	1.434	0.338	0.508	0.344	-0.406	-0.578	-0.482	0.392	-1.772	-0.889	-0.854	-0.07	-1.36	-1.289	-0.945	0.118	1.404	-1.526	-1.271	-0.321	-2.675
-0.374	-1.624	1.954	-0.024	0.069	0.09	0.412	1.577	-2.01	-0.851	-2.152	2.118	0.096	-1.02	1.728	-0.817	-2.848	1.29	-1.936	-1.766	2.178	-0.61	-2.657	3.06	1.133	-1.464	1.511	0.432	-0.284	2.47	-0.545	-0.371	0.453	0.501	0.506	-0.286	-0.082	1.127	-1.499	1.411	-0.096	-0.538	0.788	1.322	0.456	-0.591	0.237	-2.01	0.919	1.962
1.375	-1.203	1.791	-0.114	-0.081	0.05	-1.289	1.246	-1.814	1.735	-1.021	2.378	0.944	-1.33	1.128	2.278	-1.855	2.87	1.075	-0.562	3.082	2.52	-0.275	2.149	0.158	-2.149	1.38	1.675	-1.821	0.374	0.323	-0.006	0.68	-0.529	-0.152	-0.568	-0.782	1.272	-1.174	-1.485	-0.662	-0.334	-0.052	-0.823	-1.358	-1.198	1.954	-0.487	-1.755	1.144
1.987	-0.998	-0.808	-0.177	-0.372	-0.211	-1.905	1.22	0.97	2.403	-0.513	-1.209	1.466	-1.49	-0.39	2.735	0.272	-0.518	1.899	0.004	-2.063	3.253	-1.083	-1.582	1.769	-1.587	0.691	1.52	-2.507	-0.779	-0.051	-1.055	-0.483	-0.307	0.31	0.078	-1.775	0.631	0.461	0.11	1.129	-0.506	0.181	0.361	1.041	-2.243	0.87	-0.46	-1.972	1.755
-2.29	0.825	0.533	-0.153	-0.803	-0.043	2.444	-0.083	-0.54	-2.86	0.87	0.989	-1.64	0.714	0.061	-3.469	1.666	0.678	-2.508	1.118	1.985	-3.362	-0.147	1.098	-1.058	1.676	0.086	-2.003	0.591	-0.999	-0.731	-0.57	0.449	0.462	-0.907	-0.534	1.72	0.008	-0.205	0.092	-0.773	-1.606	0.625	-1.98	-0.391	1.346	1.101	-0.238	3.065	-0.204
1.367	1.508	1.178	-0.34	0.144	0.295	-1.157	-1.596	-1.372	2.09	1.365	1.02	0.551	1.6	1.327	2.353	0.33	1.411	2.714	2.113	1.555	2.165	1.378	-0.097	0.223	2.492	0.726	0.475	1.843	2.41	-0.455	0.419	0.995	-0.229	-0.123	-0.403	-1.3	-1.253	-0.654	0.746	-0.549	-0.503	-0.246	0.751	-1.143	-1.321	-1.977	0.125	-0.969	-1.872
-1.638	0.868	-1.453	-0.375	-0.356	0.414	1.862	-0.659	1.188	-1.59	0.992	-2.133	-1.637	0.679	-0.707	-1.922	0.162	-2.793	-0.587	1.196	-2.467	-2.202	1.889	-2.318	-2.59	0.27	-0.367	-1.481	1.606	-0.12	-0.533	-0.376	-0.328	-0.207	-0.324	1.155	1.178	-0.952	1.559	-0.981	-0.822	1.793	-0.249	0.758	1.433	1.313	-0.657	2.635	2.422	-0.373
-1.301	-2.022	-0.603	-0.044	0.012	0.115	1.374	2	0.491	-1.607	-2.284	-1.182	-0.939	-1.665	-0.013	-2.024	-1.583	-1.87	-2.41	-2.956	-0.822	-0.747	-2.858	-1.665	-0.264	-2.389	0.425	-1.733	-1.467	0.773	-0.357	-0.399	-0.446	0.301	0.4	0.674	1.273	1.35	0.061	0.824	-0.251	1.44	-0.446	0.906	1.232	2.306	0.866	0.101	1.408	2.568
0.244	1.721	1.664	0.128	0.111	-0.123	-0.319	-1.808	-1.523	-0.267	1.738	2.171	0.789	1.607	1.088	-0.154	2.751	2.559	-0.138	1.027	3.025	-1.248	1.764	1.816	1.767	1.89	1.482	0.579	2.322	0.243	0.793	0.237	0.297	-0.546	-0.012	-0.526	-0.815	-1.478	-0.934	-0.553	0.674	-1.413	-1.37	0.242	0.205	-0.853	-2.176	0.007	0.174	-2.041
-0.015	-2.312	-0.984	-0.321	-0.038	0.155	0.264	2.356	0.916	0.39	-2.915	-0.915	-0.422	-1.617	-0.983	0.118	-3.533	-0.066	1.514	-2.699	-0.917	0.198	-3.382	-1.883	-1.471	-1.869	-0.88	-0.415	-1.187	-2.021	-0.095	-0.779	0.187	-0.525	0.705	0.119	0.385	1.554	0.947	-1.602	0.846	0.358	-0.475	1.046	-0.968	0.367	1.141	1.976	0.105	3.069
0.541	-1.247	1.832	0.847	0.248	-0.291	-1.283	0.961	-1.625	0.934	-1.598	2.329	0.172	-0.852	1.241	1.035	-2.621	2.041	0.33	-1.532	3.215	2.005	-1.119	2.564	-0.359	-0.017	1.671	-0.603	-1.486	0.786	1.098	-0.341	0.12	0.464	0.771	-0.673	-0.818	0.359	-1.393	1.188	1.089	-1.508	0.258	1.666	-0.051	-0.597	-0.227	-2.304	-1.653	1.537
-1.277	-1.515	-1.413	0.317	0.387	-0.506	1.002	1.16	1.965	-1.764	-1.627	-1.92	-0.719	-1.294	-0.848	-2.175	-2.671	-1.714	-1.406	-1.704	-2.971	-2.627	-0.876	-2.022	0.175	-1.95	-1.122	-1.214	-1.66	0.08	-0.302	0.148	-0.964	0.89	0.547	0.051	0.469	0.734	1.516	1.196	1.484	-0.31	1.699	-0.171	-0.037	-0.478	1.311	1.479	1.507	1.542
-1.29	-1.902	0.392	0.439	-0.003	0.764	0.866	1.921	-1.034	-1.702	-2.36	0.743	-0.814	-1.369	0.07	-1.275	-2.945	1.551	-1.859	-3.109	-0.031	-2.543	-1.836	1.256	-1.439	-0.646	-0.572	-0.1	-1.868	-0.574	-0.113	-0.42	1.065	0.906	0.439	0.364	0.303	1.405	-0.677	1.623	-0.225	-0.227	1.633	0.846	1.191	-0.145	0.922	-1.59	1.422	2.347
-0.784	2.119	-1.476	0.049	0.103	0.048	0.761	-2.177	1.413	-0.572	2.544	-1.995	-0.936	1.602	-0.888	-0.7	1.956	-2.902	0.505	2.92	-2.011	-1.359	3.347	-2.086	-1.903	1.153	-1.166	-1.184	2.328	-0.032	0.244	0.679	-0.449	-0.15	-0.474	0.532	0.871	-1.661	0.738	-1.076	-0.945	0.211	-0.259	-0.006	1.55	0.771	-2.399	-0.098	0.607	-2.581
0.536	-0.463	2.487	-0.016	-0.2	-0.108	-0.56	0.65	-2.425	0.282	-0.499	3.165	0.732	-0.424	1.693	-0.623	0.068	3.443	1.037	-0.039	3.866	0.189	-1.632	3.366	1.56	-1.255	1.506	1.218	0.506	1.621	-0.256	-0.301	0.623	0.225	-0.065	-0.835	-0.837	0.555	-1.68	0.457	-1.113	-1.139	1.237	0.437	-0.885	-1.698	-0.115	-1.665	-0.251	0.719
1.005	-0.023	1.991	0.024	0.026	-0.006	-0.98	0.035	-2.017	0.997	0.648	2.319	0.959	-0.719	1.555	1.149	0.247	3.367	0.032	1.116	2.311	1.869	1.377	2.026	0.597	-1.518	2.255	2.016	-1.043	1.287	-0.021	-0.604	0.412	0.082	0.652	-0.43	-1.025	0.624	-1.449	1.05	0.743	-0.926	-0.035	1.52	0.223	-2.022	0.312	-0.956	-0.867	-0.502
-0.935	-2.358	-0.65	-0.169	0.133	-0.072	1.063	2.306	0.679	-1.001	-2.832	-1.184	-0.856	-1.769	-0.116	0.018	-2.962	-1.514	-1.666	-2.68	-2.098	-1.367	-3.725	-0.68	-0.034	-2.146	0.51	-1.773	-1.646	0.534	-0.412	-0.296	-0.636	0.1	0.57	0.504	0.734	1.921	0.093	0.84	-0.043	1.115	-0.827	0.768	1.117	1.508	1.584	-0.628	1.343	2.608
1.943	-0.281	-1.463	-0.119	-0.485	0.079	-1.904	0.562	1.361	2.518	0.126	-1.607	1.28	-0.691	-1.249	2.181	1.167	-2.065	3.202	-0.321	-2.358	3.143	0.295	-0.692	1.607	-1.755	-0.912	0.625	-0.775	-2.118	0.532	-0.162	-0.074	-0.785	-0.805	0.231	-1.482	-0.141	1.417	-0.484	-1.86	0.451	-1.499	-0.858	-0.62	-2.123	-0.865	1.971	-2.263	1.179
-0.354	1.234	-2.201	0.024	-0.283	-0.084	0.356	-1.07	2.256	-0.499	1.864	-2.476	-0.212	0.547	-1.812	-0.369	1.844	-3.507	0.255	2.69	-2.178	-1.609	2.163	-2.231	0.797	0.303	-2.124	-0.804	-0.171	-2.338	-0.31	0.363	-0.307	0.376	-0.931	0.141	0.84	-1.07	1.633	1.282	-0.992	-0.409	-0.24	-1.845	-0.191	1.472	-1.991	1.747	-0.131	-1.062
1.966	-1.771	0.012	0.033	0.051	-0.117	-1.974	1.741	0.09	2.649	-1.935	0.269	1.212	-1.527	-0.238	2.811	-3.053	0.128	2.746	-1.685	1.385	3.435	-1.274	-0.292	0.403	-2.301	0.108	1.269	-1.502	-1.345	0.719	-0.139	0.153	-0.649	0.235	-0.363	-1.208	1.578	0.245	-1.368	-0.56	-0.134	-0.707	0.432	-1.498	-1.218	1.338	1.23	-2.663	1.839
-0.732	2.06	1.458	-0.119	-0.069	0.019	0.882	-2.031	-1.442	-0.995	2.313	2.122	-0.419	1.687	0.768	-1.282	3.369	1.952	-0.272	2.281	2.987	-1.89	1.707	2.402	0.335	2.333	0.238	-1.163	2.03	0.022	-0.266	0.168	0.751	0.054	-0.31	-0.722	0.561	-1.734	-0.75	0.823	0.408	-1.068	-0.945	-0.301	-1.266	1.356	-1.8	0.046	1.157	-2.224
0.247	-1.616	1.994	0.053	-0.112	-0.077	-0.276	1.719	-1.926	-0.121	-2.032	2.447	0.584	-1.13	1.472	-0.794	-2.584	1.842	-0.609	-1.466	3.241	0.536	-2.725	2.944	1.311	-1.81	0.889	1.151	-0.311	1.885	-0.328	-0.571	0.383	0.436	0.356	-0.532	-0.585	1.186	-1.383	1.075	-0.158	-1.299	1.124	0.974	0.012	-1.171	0.436	-1.96	0.07	2.18
2.09	-0.997	1.228	-0.007	-0.083	-0.025	-2.106	1.014	-1.172	2.669	-1.408	1.207	1.42	-0.572	1.182	3.412	-1.093	2.035	3.195	-1.316	0.254	2.366	-2.522	1.296	1.732	0.513	1.26	0.814	-0.731	2.1	0.576	-0.59	-0.101	-0.591	0.429	0.054	-1.52	0.457	-1.14	-0.051	1.429	0.258	-1.183	0.148	0.945	-0.934	0.734	-2.061	-2.617	1.518
2.29	0.274	0.052	0.124	-0.469	-0.109	-2.421	-0.026	0.089	2.473	0.766	-0.415	1.991	-0.303	0.532	1.918	1.722	-0.226	2.487	0.539	-1.517	3.578	0.956	-0.178	1.919	0.145	1.511	2.939	-0.962	0.508	0.648	-0.985	0.006	-0.415	0.041	-0.189	-1.826	-0.558	0.118	-0.292	0.406	-1.254	-0.226	0.921	0.524	-2.13	-1.456	-0.556	-2.899	0.5
-1.682	1.508	0.013	-0.509	-0.779	0.25	2.119	-0.909	-0.196	-2.279	1.827	0.254	-1.039	1.083	-0.208	-2.364	2.883	-0.153	-2.364	1.939	1.351	-3.196	1.242	-0.142	-0.17	1.668	0.096	-0.873	1.061	-1.333	-1.048	-0.275	0.447	0.107	-1.18	0.02	1.551	-0.736	0.33	0.035	-1.39	-1.004	-0.07	-2.103	0.565	1.599	0.391	0.256	2.567	-1.124
1.519	0.845	1.711	-0.316	-0.099	0.374	-1.332	-0.801	-1.946	2.138	1.119	1.426	0.807	0.509	1.965	2.841	0.211	1.261	2.507	1.987	2.051	1.85	1.467	0.438	0.306	1.419	2.368	1.193	-0.114	2.805	-0.083	-0.377	1.051	-0.543	0.165	-0.304	-1.22	-1.002	-1.144	0.314	0.624	-0.876	-1.264	1.032	-0.142	-0.512	-1.843	-1.091	-1.413	-0.549
-1.059	2.046	-0.979	-0.146	-0.035	0.368	1.127	-2.055	0.731	-1.385	2.305	-1.575	-0.695	1.679	-0.367	-0.795	2.283	-2.473	-1.718	3.353	-1.236	-2.306	1.715	-1.786	-1.173	1.946	0.577	0.227	2.224	-0.182	-0.337	0.17	-0.377	0.023	-0.241	1.114	0.531	-1.727	1.201	-0.804	0.048	1.814	0.985	0.264	1.368	0.811	-1.793	2.245	1.667	-2.298
-1.5	-1.969	-0.485	0.429	-0.108	-0.169	1.215	2.06	0.608	-2.205	-2.07	-0.526	-0.737	-1.77	-0.428	-2.806	-1.405	0.15	-2.377	-3.119	-0.197	-2.551	-2.025	-1.604	-0.214	-2.101	-1.37	-0.238	-2.37	0.398	-0.329	-0.239	-0.266	1.187	0.03	-0.068	1.573	1.553	0.069	1.73	-0.394	-0.943	1.496	-0.624	0.735	2.646	1.615	0.277	0.854	2.461
-0.241	1.348	1.949	-0.246	0.123	-0.079	0.37	-1.399	-1.85	0.047	2.036	1.971	-0.556	0.603	1.858	-0.12	2.317	3.035	-0.498	2.808	1.325	1.082	1.914	1.581	-1.498	0.503	2.411	0.163	-0.123	2.209	-0.859	0.063	0.378	0.362	0.176	-0.541	0.155	-0.607	-1.838	1.283	-0.249	0.018	0.66	1.27	-0.734	-0.839	-0.451	-2.244	0.565	-2.092
1.757	-1.008	-1.606	0.051	0.131	-0.046	-1.772	0.94	1.646	2.282	-1.513	-1.628	1.174	-0.476	-1.503	1.885	-2.524	-1.357	3.077	-1.232	-0.911	2.681	-1.582	-2.726	0.295	-0.553	-2.17	1.554	0.526	-1.823	0.621	-0.38	-0.105	-0.517	0.652	0.012	-1.02	0.66	1.512	-1.34	0.27	-0.624	-0.252	1.648	-0.382	-1.026	-0.406	1.765	-2.449	1.212
-0.092	-1.87	1.295	0.816	-0.13	-0.435	-0.62	1.98	-0.948	0.149	-2.446	1.658	-0.294	-1.228	0.838	0.38	-3.337	1.009	-0.712	-2.839	2.332	1.081	-2.19	2.297	-0.287	-0.363	1.526	-1.388	-1.41	0.448	0.68	-0.872	-0.319	0.829	0.622	-0.506	-0.613	1.196	-0.81	1.484	0.938	-1.28	1.214	1.1	0.377	-0.879	0.641	-1.746	-0.552	2.687
-0.478	-2.251	-0.332	-0.088	0.287	-0.882	0.562	2.041	1.109	-0.954	-2.761	-0.467	-0.001	-1.62	-0.213	-0.57	-3.725	-0.031	-0.885	-2.999	-1.561	-2.018	-2.62	-0.21	1.005	-2.013	-0.505	0.06	-1.344	0.836	-0.507	-0.358	-0.996	0.345	0.904	-0.647	0.236	1.317	0.879	0.007	1.695	-1.393	1.428	0.591	-0.825	-0.88	1.349	1.206	0.879	2.696
-1.866	-1.325	-0.746	-0.152	-0.084	0.857	1.976	1.379	-0.077	-2.516	-1.607	-0.789	-1.154	-0.975	-0.639	-2.739	-2.373	-0.013	-2.648	-2.009	-1.768	-3.28	-0.907	-0.697	-0.896	-0.264	-1.401	-0.513	-1.875	-0.619	-0.92	-0.315	0.707	0.609	0.154	0.859	1.262	1.086	-0.275	1.235	-0.824	0.991	0.818	0.772	1.772	1.158	0.593	-1.269	2.622	1.586
-0.34	2.556	-0.365	-0.134	-0.008	0.038	0.43	-2.603	0.351	-0.704	3.059	-0.74	0.017	1.918	0.038	-1.038	3.973	-0.174	-1.581	2.659	-1.303	-0.001	3.511	-1.393	-0.06	2.175	1.105	1.049	2.081	-0.377	-0.57	0.509	-0.296	0.299	-0.536	0.359	-0.067	-2.021	0.072	0.357	-0.356	1.486	1.365	-0.411	0.197	-1.038	-2.113	0.625	0.919	-3.075
1.057	-0.701	2.348	0.139	-0.041	-0.113	-1.084	0.758	-2.274	0.861	-0.746	3.035	1.204	-0.628	1.562	0.588	0.264	3.447	1.711	-1.165	3.537	-0.055	-1.368	3.228	1.483	-1.577	1.197	2.161	-0.004	1.494	0.087	-0.051	0.662	0.211	-0.025	-0.885	-1.015	0.723	-1.475	0.102	-1.049	-1.322	1.164	0.43	-1.172	-1.899	0.096	-1.155	-1.063	0.771
1.209	0.246	1.982	-0.038	0.031	-0.022	-1.182	-0.271	-1.892	0.986	0.686	2.52	1.388	-0.23	1.369	1.918	0.804	3.107	0.079	0.203	3.002	0.683	1.689	2.167	1.673	-1.216	1.812	2.229	0.173	0.721	0.222	-0.587	0.386	-0.288	0.654	-0.412	-1.431	0.22	-1.315	0.476	0.902	-1.185	-0.559	1.585	0.136	-2.295	-0.207	-0.77	-0.899	-0.73
-0.215	0.286	-2.429	0.04	0.356	-0.071	0.252	-0.514	2.453	-0.806	-0.051	-2.654	0.417	0.651	-2.109	-1.613	0.674	-2.617	-0.999	-0.941	-2.137	-0.775	-0.297	-3.757	0.533	1.692	-2.585	1.302	-0.032	-2.198	0.273	0.923	-0.58	-0.172	-0.22	0.437	0.306	0.085	1.875	0.174	-1.234	-0.003	-1.313	-0.203	0.344	1.371	0.384	1.917	0.185	-1.084
1.845	-0.085	-1.656	0.002	-0.397	0.204	-1.855	0.311	1.494	2.362	0.376	-1.908	1.245	-0.553	-1.328	1.979	1.237	-2.491	3.054	-0.099	-2.62	2.841	0.815	-1.009	1.723	-1.481	-0.901	0.611	-0.829	-2.182	0.475	0.079	-0.149	-0.476	-0.861	0.539	-1.331	-0.291	1.702	0.11	-1.763	1.024	-1.135	-1.25	-0.248	-1.931	-1.123	2.056	-2.297	0.835
1.684	0.846	-1.555	0.197	0.039	0.442	-1.789	-0.854	1.302	1.635	1.152	-2.189	1.656	0.515	-0.826	2.685	1.304	-2.772	1.046	2.099	-2.27	1.052	0.355	-2.779	2.314	1.177	-0.219	2.239	-0.393	-0.869	0.237	0.342	-0.26	0.153	-0.266	1.145	-1.276	-0.398	1.691	0.741	0.27	1.921	0.551	-1.292	1.113	-1.308	-0.8	2.667	-2.181	-1.266
2.568	-0.366	0.479	0.012	0.082	-0.112	-2.582	0.348	-0.413	3.105	-0.335	0.998	1.921	-0.375	-0.052	3.871	-1.163	0.867	2.679	-0.349	2.064	3.673	0.608	0.859	1.659	-1.423	-0.275	2.279	0.23	-0.99	0.671	0.331	0.321	-0.664	-0.145	-0.553	-1.893	0.684	-0.153	-0.705	-1.289	-0.354	-0.308	-0.074	-1.557	-1.954	0.818	1.021	-3.143	0.001
-1.164	2.213	0.84	-0.129	-0.08	0.049	1.218	-2.196	-0.869	-1.584	2.579	1.308	-0.717	1.732	0.369	-1.516	3.652	0.996	-1.308	2.4	2.355	-2.614	2.278	1.271	0.287	2.162	0.314	-0.983	1.952	-0.703	-0.455	0.274	0.643	0.191	-0.441	-0.551	0.65	-1.875	-0.368	1.13	0.088	-0.714	-0.481	-0.338	-1.416	1.062	-1.945	0.658	1.731	-2.425
0.436	-1.859	1.697	0.046	-0.014	-0.049	-0.497	1.89	-1.68	0.108	-2.441	2.038	0.718	-1.201	1.273	0.107	-3.371	1.411	-0.853	-2.227	2.453	0.885	-2.744	2.764	1.737	-1.475	0.87	0.856	-0.381	1.983	-0.241	-0.607	0.32	0.339	0.591	-0.427	-0.797	1.321	-1.203	1.168	0.143	-1.056	0.727	1.39	0.288	-1.266	0.568	-1.876	-0.169	2.385
1.714	-0.916	1.749	0.196	0.097	-0.149	-1.821	0.862	-1.685	1.783	-1.522	2.165	1.589	-0.282	1.232	2.724	-1.347	2.775	1.856	-2.573	1.809	0.883	-1.532	2.854	2.514	-0.039	0.709	1.264	0.574	1.816	0.523	-0.528	0.154	-0.118	0.719	-0.451	-1.33	0.286	-1.38	0.594	1.373	-0.994	-0.571	1.347	0.337	-0.902	-0.338	-2.155	-2.232	1.432
2.256	-0.094	0.683	-0.05	0.366	0.343	-2.236	-0.119	-0.881	2.582	-0.688	0.472	1.825	0.519	0.918	2.072	-1.051	-0.446	2.561	-1.484	1.244	3.696	-0.331	0.369	1.941	1.355	0.097	2.267	0.813	1.866	0.323	0.255	0.991	-0.411	0.484	-0.307	-1.895	0.045	-0.201	0.014	-0.237	-1.047	-0.414	1.532	-0.625	-1.761	-0.893	0.366	-2.5	-0.244
-2.475	0.48	0.259	0.018	-0.435	0.304	2.467	-0.157	-0.509	-3.027	0.706	0.682	-1.822	0.199	-0.14	-3.812	1.095	-0.008	-2.787	1.511	1.333	-3.451	-0.032	1.296	-1.429	1.075	-0.715	-2.096	-0.594	-0.891	-0.555	-0.11	0.737	0.597	-0.707	-0.147	2.008	-0.175	0.154	0.473	-0.353	-1.194	0.602	-1.849	-0.201	1.957	0.857	0.566	2.823	-0.167
1.93	1.185	0.498	0.28	-0.254	0.17	-2.105	-1.023	-0.583	2.188	1.565	-0.091	1.606	0.704	1.091	3.025	1.037	-0.588	2.718	2.468	0.268	1.301	1.878	-0.781	0.982	1.309	1.755	2.406	0.431	1.797	0.853	-0.497	0.564	-0.303	-0.003	-0.215	-1.398	-1.099	-0.154	0.052	0.31	-1.245	-0.75	0.853	0.358	-0.957	-2.107	-0.45	-2.693	-0.888
-1.662	1.746	-0.359	0.367	0.254	0.199	1.423	-1.905	0.318	-2.364	1.718	-0.512	-0.879	1.691	-0.178	-2.498	1.349	-1.516	-2.653	2.813	-0.458	-2.969	1.079	0.149	-0.74	2.34	0.701	-0.408	2.131	-1.017	-0.376	0.303	0.111	1.104	0.212	0.328	1.712	-1.238	0.701	1.474	1.062	0.966	1.507	0.366	-0.718	2.744	-1.18	0.482	1.106	-2.459
-1.382	-1.922	0.471	-0.064	0.061	-0.367	1.405	1.869	-0.284	-1.776	-2.103	1.039	-0.937	-1.658	-0.124	-1.06	-2.356	1.87	-2.432	-3	0.851	-2.44	-1.299	1.378	-1.462	-1.624	-1.104	-0.122	-2.325	-0.306	-0.427	-0.261	0.233	0.299	0.382	-0.977	0.775	1.807	-0.782	-0.412	0.439	-1.781	1.202	-0.271	-1.249	1.108	2.209	-1.754	1.964	1.846
-0.656	0.722	2.18	-0.066	0.104	-0.035	0.751	-0.786	-2.141	-0.58	1.395	2.448	-0.714	0.014	1.811	-0.975	1.329	3.482	-1.175	2.029	1.851	0.401	1.79	2.212	-1.722	-0.396	2.213	-0.032	-0.738	2.325	-0.74	-0.081	0.295	0.613	0.273	-0.36	0.726	0	-1.876	1.415	-0.229	0.149	0.786	1.376	-0.245	-0.13	0.452	-2.408	0.776	-1.505
1.938	-0.527	-1.273	-0.18	0.043	-0.392	-1.868	0.506	1.48	2.604	-0.315	-1.059	1.153	-0.703	-1.489	2.536	-0.131	0.026	2.912	0.601	-1.587	3.414	-1.074	-1.235	0.989	-1.699	-0.924	1.251	-0.769	-2.612	0.132	0.314	-1.007	-0.487	-0.217	0.226	-1.399	0.823	0.908	0.37	-0.442	0.944	-1.063	-1.124	-0.019	-0.765	1.614	1.422	-2.277	0.151
0.876	-1.457	1.695	-0.035	-0.589	-0.614	-0.827	1.965	-1.121	0.877	-2.045	2.113	0.829	-0.859	1.18	-0.165	-2.381	2.425	1.385	-1.66	3.074	1.468	-2.793	1.614	1.839	-0.637	0.94	0.421	0.075	1.566	0.009	-1.152	-0.067	-0.059	0.069	-1.057	-0.677	1.422	-0.514	-0.755	-0.271	-1.928	0.978	0.284	-1.465	-1.683	1.12	-0.089	-0.938	2.405
-1.159	-1.976	-0.501	-0.187	0.44	-0.737	1.401	1.581	1.166	-1.816	-2.328	-0.59	-0.472	-1.513	-0.416	-1.577	-3.381	-0.199	-2.023	-2.322	-1.697	-2.663	-1.875	-0.059	0.219	-1.989	-1.128	-0.113	-1.629	0.619	-0.715	-0.092	-0.814	0.411	0.895	-0.534	0.921	0.957	0.913	-0.098	1.825	-0.763	1.177	0.711	-1.273	0.044	0.927	1.606	1.834	2.16
-1.901	-1.403	-0.361	-0.103	0.087	0.882	1.951	1.305	-0.397	-2.602	-1.617	-0.353	-1.149	-1.105	-0.291	-2.903	-2.174	0.531	-2.497	-2.382	-1.146	-3.362	-0.831	-0.596	-0.817	-0.593	-1.271	-0.53	-2.02	-0.236	-0.804	-0.138	0.863	0.596	0.289	0.774	1.178	1.015	-0.467	1.264	-0.483	0.989	0.796	0.989	1.568	1.081	0.512	-1.35	2.65	1.52
-0.352	2.544	-0.254	-0.225	-0.05	-0.066	0.58	-2.509	0.303	-0.487	3.102	-0.723	-0.193	1.885	0.207	-0.678	4.002	-0.135	-1.504	2.913	-1.198	0.261	3.131	-1.611	-0.932	1.803	1.066	0.803	2.055	0.686	-0.183	0.541	-0.544	-0.223	-0.637	0.411	0.226	-1.986	-0.182	-1.289	-0.808	0.843	0.394	-0.38	1.235	-0.571	-2.397	-0.863	0.889	-2.943
-0.453	-0.627	2.504	-0.184	-0.021	-0.035	0.584	0.629	-2.489	-0.339	-1.149	2.997	-0.565	-0.102	1.896	-0.966	-2.109	2.862	-0.535	-0.715	3.967	0.702	-1.448	3.087	0.145	0.741	2.129	-1.63	0.346	1.858	-0.272	-0.566	0.461	-0.092	0.525	-0.53	0.56	0.075	-1.899	0.584	1.276	-0.089	-1.013	1.058	-0.765	1.514	-0.244	-1.571	0.583	1.169
0.935	1.673	1.324	-0.045	0.056	-0.127	-0.884	-1.701	-1.209	0.609	2.006	1.9	1.257	1.245	0.698	1.154	2.737	2.409	0.358	1.284	2.636	-0.304	2.288	1.384	2.323	1.278	0.947	1.19	1.921	-0.156	0.589	-0.044	0.238	-0.665	0.156	-0.479	-1.363	-1.202	-0.812	-0.551	0.695	-1.467	-1.44	0.75	0.089	-1.709	-1.662	0.148	-0.406	-2.09
1.884	-0.513	-1.364	0.309	0.217	0.238	-2.052	0.394	1.19	1.665	-0.783	-1.992	2.056	-0.179	-0.659	1.471	0.038	-2.697	0.817	-1.579	-1.931	2.529	-1.311	-2.289	2.93	0.533	-0.861	2.225	-1.014	0.031	0.953	0.635	0.158	-0.322	-0.201	0.319	-1.361	0.713	1.014	-0.101	-1.064	1.002	-0.718	-0.521	-0.668	-0.877	0.902	1.964	-2.645	0.054
2.131	-0.18	-1.197	0.083	-0.177	0.337	-2.174	0.252	0.92	2.576	0.276	-1.537	1.604	-0.64	-0.822	2.099	0.954	-2.204	3.356	-0.343	-2.047	2.983	0.934	-0.676	2.134	-1.165	0.025	1.065	-1.244	-1.516	0.45	0.177	-0.213	-0.288	-0.553	0.872	-1.542	0.158	1.421	0.406	-0.641	1.742	-0.657	-1.46	0.46	-1.863	-0.55	2.21	-2.702	0.319
0.904	1.262	-1.897	0.415	-0.083	0.237	-1.131	-1.275	1.701	0.61	1.715	-2.326	1.181	0.751	-1.376	1.387	2.155	-2.965	0.194	2.656	-1.808	-0.349	1.261	-2.847	2.138	1.104	-1.007	1.346	-0.177	-1.954	0.251	0.545	-0.182	0.573	-0.716	0.637	-0.373	-0.99	1.851	1.526	-0.628	1.131	0.613	-1.644	0.016	0.145	-1.493	2.674	-1.785	-1.55
2.549	-0.398	-0.042	-0.008	0.013	0.084	-2.586	0.42	-0.004	3.157	-0.121	-0.268	1.84	-0.626	0.178	3.857	-1.047	-0.168	3.506	0.456	0.613	3.274	0.483	-1.218	1.838	-1.083	1.22	1.476	-1.38	-0.604	0.643	0.337	0.07	-0.682	-0.302	0.108	-1.801	0.707	0.028	-0.731	-0.835	1.1	-0.687	-1.04	-0.757	-1.664	1.415	0.808	-3.275	0.096
-1.987	1.404	-0.067	0.272	0.106	-0.436	1.82	-1.489	0.361	-2.662	1.327	0.191	-1.23	1.378	-0.345	-3.061	2.379	0.301	-2.616	0.914	1.217	-3.352	0.917	-0.612	-0.642	2.147	0.269	-1.245	1.891	-1.27	-0.47	0.049	-0.356	1.019	0.167	-0.496	1.722	-1.137	-0.361	1.428	0.883	0.241	1.264	0.57	-1.556	1.131	-1.848	-0.949	1.873	-1.738
-1.1	-1.653	1.563	-0.287	0.25	-0.001	1.321	1.574	-1.546	-0.885	-2.052	2.132	-1.283	-1.125	0.961	-0.635	-1.625	3.091	-0.08	-2.748	1.932	-1.764	-2.631	2.322	-2.382	-1.03	0.8	-1.023	-1.787	0.069	-0.558	0.174	0.723	0.005	0.331	-0.722	0.854	1.585	-0.916	-0.904	0.495	-1.436	0.506	-0.614	-1.001	0.165	2.445	-0.968	1.72	1.514
1.236	-2.278	0.607	-0.058	-0.027	-0.061	-1.175	2.311	-0.606	1.323	-3.005	0.519	1.076	-1.461	0.622	1.926	-3.3	1.4	2.021	-3.235	-0.329	0.36	-3.582	0.626	2.074	-1.007	0.545	0.646	-1.332	1.655	0.042	-0.782	-0.26	-0.149	0.724	0.13	-0.967	1.58	-0.873	0.81	1.223	0.362	-0.724	0.869	1.119	-0.418	1.707	-1.787	-1.312	2.962
1.665	0.905	1.355	0.135	0.429	-0.349	-1.735	-1.15	-1.111	1.716	0.446	1.91	1.531	1.372	0.7	2.076	-0.528	1.561	0.819	0.148	2.596	2.446	0.91	2.598	2.421	1.514	0.098	1.533	2.407	1.101	0.341	1.164	-0.14	-0.066	-0.295	-0.541	-1.479	-0.379	-1.11	-0.05	-0.948	0.4	0.612	-0.923	-1.229	-2.231	0.276	-0.651	-1.885	-1.859
-1.808	-1.46	-1.184	-0.079	0.007	0.12	1.902	1.445	1.02	-2.119	-2.129	-1.189	-1.429	-0.75	-1.138	-2.849	-2.222	-1.988	-2.585	-2.131	-0.17	-1.258	-2.886	-1.246	-2.185	0.009	-0.911	-0.977	-0.549	-2.095	-0.366	-0.696	-0.043	0.23	0.701	0.264	1.609	0.726	0.882	-0.515	1.272	0.819	0.285	1.256	-0.717	1.522	0.288	1.887	2.121	2.126
2.132	-0.249	1.389	0.016	-0.171	0.027	-2.157	0.37	-1.373	2.812	-0.146	1.104	1.348	-0.376	1.634	3.052	-0.92	0.317	3.543	-0.195	1.974	2.852	0.808	0.543	1.035	0.512	2.195	1.423	-1.163	2.385	0.299	-0.673	0.523	-0.281	0.339	-0.442	-1.692	-0.101	-0.904	0.38	0.454	-1.318	-0.366	1.36	0.031	-1.547	-1.095	-1.349	-2.511	0.839
-1.829	1.69	-0.02	-0.035	-0.171	0.278	1.848	-1.67	-0.158	-2.238	2.028	-0.5	-1.337	1.255	0.456	-1.699	2.743	-1.192	-2.859	2.718	0.056	-2.877	1.35	-1.118	-2.031	0.762	1.234	-0.68	2.029	0.95	-0.471	0.227	-0.231	0.388	-0.594	0.783	1.096	-1.795	0.146	-0.285	-1.019	1.547	1.13	0.103	1.253	1.225	-2.456	1.038	2.521	-1.502
-1.536	-1.647	1.059	0.012	-0.021	-0.434	1.518	1.733	-0.85	-1.808	-1.798	1.729	-1.194	-1.4	0.343	-1.027	-1.866	2.481	-2.197	-2.843	1.692	-2.673	-1.137	1.997	-2.047	-1.27	-0.396	-0.568	-2.255	0.075	-0.369	-0.105	0.229	0.376	0.093	-1.123	0.997	1.511	-1.44	-0.288	-0.281	-1.847	1.192	-0.711	-1.141	1.565	1.477	-2.43	1.982	1.873
-0.347	-0.158	2.36	0.009	0.048	0.027	0.342	0.135	-2.36	-0.163	0.341	2.891	-0.536	-0.64	1.74	0.083	-0.176	3.805	-1.107	0.945	3.018	0.748	0.827	2.509	-1.546	-1.063	1.915	0.161	-1.521	1.631	-0.66	0.106	0.372	0.682	-0.007	-0.333	0.801	0.451	-1.783	0.949	-1.081	-0.322	1.469	0.544	0.318	0.731	1.559	-1.886	-0.114	-0.191
2.169	-0.626	0.722	0.268	0.292	-0.223	-2.321	0.472	-0.563	2.162	-0.853	1.43	2.103	-0.326	-0.037	1.524	-1.775	1.419	1.92	-0.107	2.192	3.126	-1.213	1.703	2.18	-1.196	-0.755	2.973	0.295	-0.343	0.939	0.625	-0.346	-0.399	-0.043	-0.11	-1.57	0.837	-0.572	-0.588	-0.252	0.993	-0.443	-1.035	-0.632	-1.672	1.829	-0.044	-2.954	0.1
-0.426	-2.101	1.014	-0.392	-0.104	-0.673	0.773	2.235	-0.447	-0.882	-2.62	1.255	0.014	-1.488	0.691	-1.47	-2.094	2.03	-0.39	-3.441	1.856	-1.418	-3.167	0.378	0.914	-1.99	0.22	0.437	-0.928	1.546	-0.801	-0.578	-0.276	0.077	0.396	-0.971	0.452	1.588	-0.09	-0.434	0.656	-1.88	1.034	-0.124	-1.189	-0.429	1.93	0.515	1.059	2.791
-1.659	-1.528	-0.576	0.424	0.06	-0.731	1.331	1.47	1.222	-2.299	-1.67	-0.895	-0.915	-1.311	-0.262	-2.902	-2.384	-0.362	-2.318	-2.12	-1.87	-2.936	-0.803	-0.956	-0.252	-2.279	-0.31	-1.13	-0.931	0.671	-0.24	-0.187	-1.031	1.036	0.296	-0.324	0.7	1.133	0.904	1.68	0.804	-1.023	1.446	-0.656	0.056	0.067	1.99	0.459	1.933	1.741
-1.242	-1.761	-1.076	-0.575	0.332	0.243	1.776	1.472	0.807	-1.858	-2.069	-1.297	-0.588	-1.356	-0.822	-2.473	-2.366	-0.442	-1.755	-2.994	-1.879	-2.376	-1.32	-1.981	0.115	-1.445	-1.63	-0.178	-1.831	0.14	-0.955	0.025	-0.336	-0.097	0.571	0.77	1.365	0.982	0.314	-0.095	-0.149	1.666	-0.438	1.594	1.174	1.984	-0.034	0.314	2.079	1.932
-0.765	2.393	0.041	-0.251	-0.114	-0.018	0.924	-2.349	-0.034	-0.882	2.968	-0.358	-0.628	1.7	0.413	-1.225	3.802	0.319	-1.775	2.779	-1.025	0.062	3.268	-0.872	-1.463	1.521	1.085	0.333	2.002	1.008	-0.455	0.476	-0.453	-0.031	-0.708	0.409	0.589	-1.757	-0.471	-0.837	-1.114	1.056	0.718	-0.299	1.163	-0.176	-2.08	-1.121	1.185	-2.855
-2.061	-0.933	1.32	-0.049	-0.068	-0.014	2.094	0.984	-1.286	-2.267	-1.437	1.778	-1.767	-0.401	0.83	-2.135	-2.449	1.317	-3.364	-1.227	1.953	-1.559	-1.504	2.636	-1.994	0.608	1.25	-2.29	-0.425	-0.168	-0.306	-0.623	0.528	0.204	0.481	-0.554	1.808	0.595	-0.652	-0.053	1.478	-0.146	-0.268	0.391	-1.58	2.186	1.042	0.345	2.289	1.346
0.984	2.105	0.462	0.206	-0.065	-0.04	-1.116	-2.045	-0.415	0.543	2.645	0.753	1.423	1.45	0.171	1.178	3.584	0.806	0.149	2.366	1.786	-0.301	2.684	0.065	2.4	1.637	0.609	1.525	1.626	-0.952	0.82	0.067	0.387	-0.416	-0.189	-0.449	-1.32	-1.323	-0.085	-0.093	-0.318	-1.522	-1.037	0.787	-0.39	-1.464	-1.502	0.99	-0.874	-2.656
0.103	-0.365	-2.337	0.489	0.06	-0.063	-0.412	0.358	2.359	-0.552	-0.277	-2.572	0.809	-0.413	-2.008	-0.69	0.741	-2.942	-1.301	-0.559	-1.905	-0.616	-1.036	-3.333	1.478	0.095	-2.752	1.051	-1.54	-1.865	1.059	0.231	-0.601	-0.079	-0.103	0.47	0.16	0.527	1.843	-0.102	-1.18	0.532	-1.128	0.236	0.081	1.106	0.151	2.295	-0.964	0.168
2.415	0.077	0.337	-0.192	0.073	0.366	-2.292	-0.042	-0.543	3.001	0.134	-0.078	1.712	0.051	0.751	2.988	-0.839	-0.708	3.883	0.154	0.55	3.027	0.88	-0.866	1.826	0.829	1.462	1.736	-0.997	1.274	0.441	0.058	-0.073	-0.812	0.096	0.805	-2.093	0.448	0.053	-0.634	0.895	1.582	-0.915	-0.979	1.308	-2.907	0.433	0.801	-2.414	-0.506
0.343	1.41	-2.005	0.36	-0.229	0.075	-0.56	-1.284	1.985	0.013	1.931	-2.369	0.662	0.835	-1.541	0.465	2.085	-3.401	-0.063	2.907	-1.75	-1.033	1.498	-2.582	1.662	1.205	-1.222	0.816	-0.013	-2.258	-0.003	0.358	-0.292	0.719	-0.813	0.452	0.193	-1.02	1.887	1.843	-0.658	0.485	0.598	-1.722	-0.187	0.989	-1.577	2.447	-1.241	-1.544
2.539	-0.428	0.301	-0.043	-0.072	0.145	-2.511	0.521	-0.415	3.118	-0.129	0.564	1.851	-0.695	0.046	3.957	-0.829	0.284	3.046	-0.019	1.651	3.425	0.89	0.158	1.799	-1.755	0.403	1.778	-0.808	-1.092	0.623	0.19	0.417	-0.711	-0.315	-0.163	-1.789	0.813	-0.136	-0.993	-1.196	0.499	-0.55	-0.796	-1.11	-2.016	1.278	0.83	-3.128	0.197
-1.537	1.678	0.697	0.445	0.241	-0.113	1.228	-1.8	-0.691	-2.225	1.591	0.891	-0.77	1.698	0.461	-2.651	2.482	1.346	-2.228	0.89	1.771	-2.917	1.368	0.095	-0.126	2.155	1.166	-0.697	2.293	-0.409	-0.267	0.306	0.173	1.128	0.182	-0.426	1.354	-1.151	-1.142	1.924	0.261	0.393	1.46	0.969	-1.119	0.702	-1.27	-2.049	1.101	-2.333
-2.178	-0.955	0.132	-0.021	0.003	0.46	2.211	1.007	-0.401	-2.371	-1.364	-0.38	-1.884	-0.489	0.684	-2.219	-2.455	-0.045	-1.898	-1.166	-1.363	-3.466	-1.426	-0.543	-2.279	-0.866	1.666	-2.241	0.465	0.452	-0.399	-0.394	0.993	0.348	0.411	-0.074	1.845	0.614	0.214	-0.168	1.41	-0.144	0.342	-0.107	-1.123	1.886	1.302	1.081	2.495	1.368
1.163	-2.021	1.017	-0.092	0.037	0.1	-1.185	2.047	-1.048	1.402	-2.653	0.791	0.846	-1.284	1.194	2.146	-3.083	1.497	1.962	-2.727	-0.181	0.719	-3.515	0.693	1.745	-0.679	1.544	0.161	-1.368	2.111	0.029	-0.699	0.043	-0.242	0.788	0.17	-1.069	1.28	-0.966	0.809	1.261	0.027	-0.655	0.864	1.21	-0.483	0.892	-1.877	-1.26	2.732
2.058	0.632	0.926	0.086	0.347	-0.245	-2.108	-0.853	-0.832	2.132	0.373	1.573	1.895	0.92	0.201	1.562	-0.54	1.796	1.863	1.081	2.407	3.189	0.18	1.767	2.325	0.258	-0.559	2.418	1.836	0.133	0.424	1.057	-0.189	-0.256	-0.367	-0.305	-1.619	-0.267	-1.052	-0.415	-0.756	0.725	0.484	-1.056	-0.814	-2.228	0.64	-0.698	-2.487	-1.416
-1.546	-1.74	-0.527	-0.212	0.345	0.278	1.724	1.597	0.398	-1.51	-2.455	-0.732	-1.505	-0.929	-0.281	-2.484	-2.72	-1.215	-1.313	-3.216	0.072	-0.679	-2.661	-1.45	-2.24	-0.883	0.595	-1.92	-0.348	-1.119	-0.199	-0.386	0.157	-0.216	1.1	0.423	1.119	1.672	0.887	-1.042	1.202	1.11	-0.557	1.623	-0.504	0.895	2.771	1.012	2.243	1.5
2.041	-0.977	0.806	0	-0.029	0.329	-2.012	1.026	-1.024	2.327	-1.426	0.334	1.656	-0.482	1.289	1.77	-2.43	0.279	3.316	-1.658	0.745	2.352	-1.038	-0.691	2.233	0.515	1.176	1.721	-0.834	2.379	0.175	-0.333	0.983	-0.168	0.283	-0.324	-1.651	0.526	-0.459	0.139	-0.427	-1.062	0.392	1.207	-0.454	-2.151	-0.537	-0.526	-2.261	1.486
-1.84	-0.481	1.442	0.428	-0.067	0.246	1.623	0.504	-1.583	-2.519	-0.707	1.353	-1.064	-0.247	1.471	-3.132	-0.114	0.61	-2.984	-0.749	2.368	-2.553	-1.742	0.988	-0.56	-0.788	2.299	-1.133	0.894	1.658	-0.241	-0.324	0.188	1.107	0.177	0.306	1.981	0.129	-0.978	1.723	-0.365	1.085	1.003	1.262	0.622	2.919	0.692	-0.708	1.255	0.862
-1.845	-1.09	1.19	-0.102	0.016	-0.358	1.884	1.078	-0.996	-2.209	-0.984	1.806	-1.41	-1.144	0.518	-1.64	-1.33	2.692	-3.204	-1.569	1.709	-2.297	0.11	2.029	-2.058	-1.129	-0.35	-0.88	-2.153	0.519	-0.341	-0.03	0.355	0.127	0.055	-1.07	1.14	1.158	-1.356	-0.72	0.33	-1.841	0.645	-0.921	-1.276	1.363	1.208	-2.451	2.535	0.953
0.033	0.455	2.272	-0.22	-0.306	0.064	0.132	-0.245	-2.305	0.677	0.677	2.454	-0.661	0.201	2.006	0.812	0.847	3.558	0.962	1.658	2.061	1.446	0.057	2.009	-1.487	0.872	2.323	-0.957	-0.791	2.395	-0.691	0.17	0.445	0.278	-0.773	-0.314	0.672	-0.302	-1.724	-0.303	-1.697	-0.384	1.162	-1.012	0.353	1.32	0.617	-1.652	-0.397	-0.199
1.806	-0.022	-1.616	-0.257	0.129	-0.399	-1.595	-0.018	1.873	2.467	-0.055	-1.29	1.053	0.04	-1.917	2.468	-0.683	-0.425	2.739	0.923	-0.818	3.178	-0.369	-2.044	0.751	-0.987	-2.223	0.984	0.663	-2.872	-0.119	0.531	-1.028	-0.383	-0.269	0.245	-1.399	0.409	1.232	0.566	-0.59	0.747	-0.882	-1.15	-0.103	-0.979	1.344	1.633	-1.718	-0.433
0.633	-1.612	1.555	-0.228	-0.544	-0.758	-0.415	2.092	-0.891	0.493	-2.179	2.007	0.733	-1.012	0.985	1.062	-3.153	1.768	-0.609	-2.282	2.194	0.88	-1.856	3.021	1.817	-0.979	0.689	0.494	-0.168	1.508	-0.177	-1.128	-0.228	-0.238	0.129	-1.172	-0.286	1.45	-0.409	-1.095	0.064	-1.835	0.629	0.066	-1.869	-1.187	1.451	0.241	-0.53	2.621
-1.674	-1.49	-0.682	0.694	-0.343	-0.529	1.11	1.742	1.098	-2.176	-1.755	-1.119	-1.068	-1.194	-0.27	-3.006	-2.038	-0.426	-1.99	-2.559	-1.804	-2.521	-0.82	-1.668	-0.601	-2.018	0.418	-1.502	-0.382	0.364	0.156	-0.609	-1.008	1.149	-0.016	0.024	0.687	1.387	0.518	2.149	0.014	-0.413	1.211	-0.82	0.776	0.718	2.151	-0.324	1.529	1.979
-1.675	-1.49	-1.019	-0.435	0.541	0.229	2.106	0.972	0.789	-2.152	-1.648	-1.559	-1.15	-1.236	-0.449	-3.165	-1.502	-1.14	-2.1	-2.711	-1.735	-2.117	-1.09	-2.452	-0.091	-1.697	-0.637	-1.485	-1.599	0.508	-0.916	0.324	-0.335	0.124	0.662	0.746	1.589	0.658	0.255	0.061	-0.072	1.559	-0.122	1.678	1.128	1.825	-0.387	-0.088	2.533	1.251
-1.133	2.072	-1.077	-0.041	-0.039	-0.031	1.177	-2.036	1.094	-1.304	2.34	-1.715	-0.908	1.711	-0.406	-2.173	3.076	-1.501	-1.537	1.489	-2.357	-0.473	2.847	-2.244	-1.858	1.629	0.189	-0.262	2.427	0.136	-0.25	0.325	-0.679	0.171	-0.399	0.611	0.896	-1.695	0.435	-0.739	-0.556	1.257	0.909	0.244	1.127	0.126	-2.372	-0.011	1.408	-2.286
-0.944	-2.096	1.144	-0.025	0.031	0.101	0.941	2.117	-1.211	-0.721	-2.736	1.436	-1.12	-1.364	0.799	-0.02	-3.272	0.802	-1.627	-3.347	1.368	-0.287	-2.583	2.487	-1.525	-0.852	1.67	-1.822	-1.517	0.026	0.152	-0.65	0.326	-0.209	0.717	-0.127	0.926	1.345	-0.897	-0.398	1.357	0.772	-1.188	0.725	-0.716	1.944	1.112	-0.433	0.901	2.823
0.733	1.545	1.672	0.408	-0.192	0.162	-0.924	-1.435	-1.722	0.183	1.949	1.84	1.311	1.036	1.468	0.496	2.751	2.61	-0.673	1.284	2.174	-0.326	2.502	1.027	1.973	0.878	2.296	1.855	1.556	0.688	0.891	-0.28	0.753	-0.064	-0.102	-0.424	-0.374	-1.441	-1.131	0.325	0.631	-1.124	-0.992	0.304	-0.004	0.54	-1.864	-1.652	-1.412	-1.362
-1.84	-0.429	-1.456	0.181	-0.094	-0.293	1.771	0.506	1.655	-2.43	0.041	-1.396	-1.13	-0.886	-1.497	-2.264	1.064	-1.717	-2.886	0.091	-0.379	-3.179	-0.436	-2.049	-1.091	-1.251	-2.563	-1.216	-1.771	-0.8	0.145	-0.225	-1.037	0.219	0.041	0.465	1.661	0.476	0.884	0.017	-0.931	0.907	-0.581	0.74	0.659	2.298	-0.332	0.455	1.813	0.517
2.434	0.128	-0.113	-0.06	-0.194	0.26	-2.394	-0.022	-0.095	2.848	0.621	-0.469	1.917	-0.413	0.235	3.086	0.362	-1.507	3.792	0.704	0.06	2.398	1.619	-0.389	1.936	-0.05	1.261	2.191	-1.421	0.102	0.427	-0.341	-0.308	-0.545	-0.034	0.816	-1.91	0.501	0.266	-0.123	0.796	1.473	-0.745	-0.936	1.536	-2.401	0.951	1.168	-2.784	-0.549
0.232	0.039	-2.461	0.335	0.135	0.138	-0.446	-0.116	2.399	-0.033	0.318	-3.067	0.476	-0.219	-1.725	0.655	0.048	-3.988	-0.15	1.414	-3.088	-0.977	-0.165	-3.422	1.559	-0.041	-1.645	0.325	-1.306	-1.727	-0.12	0.378	-0.445	0.788	-0.117	0.717	0.243	0.268	2.161	1.793	0.281	0.625	0.757	-1.234	0.711	1.046	0.003	2.954	-1.065	-0.487
1.413	-2.255	-0.124	-0.141	-0.097	-0.039	-1.382	2.272	0.153	1.745	-2.77	0.264	0.994	-1.668	-0.484	2.328	-3.281	-0.507	1.151	-3.397	0.957	2.543	-2.242	0.866	0.296	-2.152	-1.224	1.78	-1.069	-1.066	0.379	-0.553	0.356	-0.655	0.355	-0.437	-1.047	1.621	0.477	-1.618	-0.05	-0.779	-0.068	0.746	-1.335	-1.778	1.217	1.243	-1.694	2.813
-1.636	1.689	0.738	0.293	0.096	0.033	1.441	-1.738	-0.762	-2.248	2.003	0.507	-0.983	1.296	0.929	-2.477	2.774	1.255	-3.056	1.227	0.362	-2.019	2.522	-0.471	-1.001	0.878	1.908	-0.121	1.987	1.127	-0.436	0.268	-0.074	1.023	-0.075	0.141	1.614	-0.955	-0.884	1.149	-0.567	1.121	1.63	0.889	0.152	1.131	-0.626	-1.811	1.261	-2.422
-2.193	0.144	0.775	0.003	0.301	0.185	2.185	-0.319	-0.926	-2.501	-0.513	0.868	-1.787	0.826	0.666	-1.939	-1.047	1.683	-2.574	-1.112	-0.083	-3.511	-0.238	1.281	-2.067	1.502	1.497	-2.038	1.317	-0.308	-0.27	0.854	0.64	0.272	-0.238	-0.283	1.66	0.257	-0.67	-0.325	-0.337	-1.166	0.16	-1.225	0.221	1.649	1.078	-1.469	2.612	-0.881
0.68	-2.448	-0.434	-0.248	0.008	-0.256	-0.49	2.491	0.599	0.951	-2.998	-0.842	0.382	-1.778	-0.043	1.224	-3.826	-0.097	1.774	-2.674	-1.527	0.151	-3.425	-1.489	1.146	-1.596	0.708	-0.566	-2.144	0.422	-0.036	-0.501	-0.816	-0.445	0.535	0.293	-0.339	2.032	-0.008	0.142	0.369	1.252	-1.455	0.278	0.698	0.705	2.164	-0.291	-0.643	2.844
1.68	1.748	0.223	0.181	-0.128	0.575	-1.766	-1.631	-0.591	1.853	1.991	-0.41	1.456	1.421	0.906	1.146	1.803	-1.24	2.675	1.467	-0.77	2.198	3.115	-0.385	0.57	1.941	1.367	2.418	1.413	1.535	0.923	-0.088	0.839	-0.539	-0.166	0.298	-1.077	-1.571	-0.142	-0.783	0.574	-0.502	-1.101	0.177	1.168	-0.286	-2.142	-0.586	-2.382	-1.604
-1.174	-2.137	0.342	-0.062	0.068	-0.318	1.164	2.101	-0.126	-1.436	-2.538	0.924	-0.881	-1.648	-0.246	-1.334	-3.569	0.631	-2.521	-2.243	1.129	-0.782	-2.372	1.801	-1.536	-1.342	-1.067	-0.052	-2.209	-0.716	-0.257	-0.335	0.273	0.124	0.486	-0.909	0.441	1.99	-0.516	-0.778	0.61	-1.643	0.944	-0.019	-1.471	0.438	2.59	-1.519	1.826	2.124
2.069	-1.11	-0.177	-0.009	-0.317	0.369	-2.03	1.254	-0.036	2.259	-1.152	-0.867	1.797	-1.085	0.566	1.622	-1.91	-1.428	3.289	-1.293	-0.976	2.108	-0.115	-1.35	2.216	-0.104	0.957	2.083	-1.932	1.28	0.289	-0.921	0.747	-0.307	0.28	0.004	-1.773	0.504	0.179	-0.218	0.24	-1.084	0.274	1.139	0.245	-2.366	-0.258	-0.404	-2.186	1.946
-0.785	-2.242	0.155	-0.285	0.143	-0.172	0.963	2.128	-0.023	-0.42	-2.85	0.324	-1.117	-1.54	-0.03	0.452	-2.991	-0.312	-1.18	-3.612	0.093	-0.045	-2.897	1.361	-1.793	-1.279	0.779	-1.764	-1.549	-0.951	0	-0.597	-0.168	-0.571	0.855	-0.164	0.27	1.988	0.34	-1.422	0.923	0.448	-0.929	1.248	-1.122	-0.282	2.936	0.277	1.58	2.206
-0.616	-0.651	2.317	-0.275	0.253	-0.072	0.739	0.55	-2.237	-0.255	-0.953	2.881	-0.967	-0.296	1.669	0.282	-1.882	2.504	-0.952	-1.325	3.641	0.542	-0.312	3.269	-1.49	0.644	2.001	-1.587	-1.03	1.159	0.128	0.087	0.569	-0.666	0.437	-0.702	0.075	0.974	-1.979	-1.477	1.201	-0.49	-1.163	-0.467	-1.068	-0.572	1.044	-2.831	1.307	0.128
0.453	-0.498	2.192	-0.04	0.078	0.085	-0.387	0.474	-2.274	0.931	-0.093	2.575	-0.076	-0.877	1.712	0.821	-0.513	3.61	0.611	0.952	2.551	1.951	-0.334	2.262	-0.915	-1.135	2.371	0.4	-1.778	1.329	-0.602	-0.064	0.55	0.533	0.231	-0.389	0.202	0.828	-1.809	0.913	-0.807	-0.565	1.251	0.821	0.179	-0.175	1.881	-1.696	-0.916	0.109
-0.357	1.034	-2.071	0.043	0.402	0.103	0.323	-1.252	2.029	-0.215	0.582	-2.573	-0.461	1.492	-1.45	-0.843	-0.317	-2.611	0.793	0.282	-2.789	-0.495	1.171	-3.51	-1.516	1.515	-1.226	-0.176	2.466	-1.636	0.221	1.116	-0.094	-0.134	-0.298	0.299	0.361	-0.497	1.703	0.298	-1.128	-0.281	-1.228	-0.464	0.255	1.408	-0.286	1.688	0.248	-1.943
1.353	-1.384	1.436	0.505	0.032	-0.671	-1.785	1.355	-0.876	1.639	-2.041	1.647	1.022	-0.683	1.124	2.764	-2.076	1.421	1.166	-2.88	1.082	1.583	-2.222	2.77	1.624	0.163	1.408	0.162	-0.433	1.685	0.745	-0.621	-0.355	0.19	0.684	-0.906	-1.355	0.67	-0.853	0.586	0.816	-1.902	0.524	1.585	-0.265	-1.788	0.082	-1.71	-2.095	1.996
-0.632	-1.735	-1.446	0.926	-0.222	0.168	-0.2	1.928	1.319	-0.664	-2.217	-1.988	-0.522	-1.186	-0.855	-1.607	-2.699	-1.968	0.145	-3.02	-1.861	-0.532	-1.903	-2.99	-0.991	-1.579	0.103	-1.094	-0.274	-1.112	0.841	-0.719	-0.441	0.871	0.294	0.765	-0.231	1.376	0.742	1.929	0.809	0.756	0.721	-0.315	1.674	-0.022	1.874	-0.245	-0.13	2.395
-2.376	-0.531	0.084	0.053	0.587	0.674	2.338	0.064	-0.644	-3.105	-0.418	0.022	-1.555	-0.576	0.174	-3.452	0.397	0.647	-3.587	-1.411	0.301	-3.381	-0.276	-1.035	-1.26	-0.861	-0.801	-1.297	-1.316	0.986	-0.737	0.651	0.562	0.829	0.44	0.701	1.54	0.229	-0.656	1.081	-0.492	1.209	1.28	1.329	1.335	0.924	-0.649	-1.008	3.061	-0.064
-0.727	2.209	0.288	-0.294	0.013	-0.289	0.868	-2.264	-0.144	-0.215	2.644	0.538	-1.239	1.669	-0.034	-0.716	3.453	1.101	0.357	3.202	-0.166	0.492	2.127	1.182	-1.916	2.312	-0.592	-1.863	1.218	0.792	-0.561	0.569	-0.796	-0.049	-0.552	0.22	0.308	-1.827	-0.529	-0.687	-0.792	1.099	0.876	-0.161	0.678	-0.714	-2.379	-0.545	1.377	-2.613
-1.234	-1.591	1.539	-0.04	-0.018	0.036	1.242	1.588	-1.568	-1.222	-1.834	2.213	-1.216	-1.283	0.811	-0.112	-2.178	2.437	-1.83	-2.744	2.362	-1.479	-1.111	3.005	-2.159	-0.787	0.564	-0.949	-1.921	-0.018	-0.272	-0.12	0.74	0.183	0.098	-0.675	1.034	1.38	-0.823	-0.646	0.126	-1.375	0.74	-0.89	-0.876	0.375	2.328	-0.516	1.411	1.704
0.575	1.683	1.523	0.441	-0.18	0.21	-0.817	-1.552	-1.64	0.006	2.131	1.485	1.167	1.129	1.521	0.271	3.038	1.999	-0.864	1.786	2.087	-0.247	2.359	0.387	1.397	0.954	2.623	2.062	1.535	1	0.689	-0.193	0.972	0.193	-0.161	-0.534	-0.434	-1.519	-0.927	0.959	0.036	-1.321	-0.555	0.649	-0.656	0.325	-2.304	-0.942	-1.136	-1.501
-1.107	-1.259	-1.821	0.062	-0.305	0.17	1.11	1.438	1.718	-1.141	-1.006	-2.494	-0.999	-1.473	-1.057	-0.289	-1.461	-3.07	-1.122	0.083	-2.54	-2.14	-1.371	-2.827	-0.848	-2.584	-1.156	-2.01	-1.425	-0.585	0.233	-0.916	-0.291	-0.108	0.285	0.606	1.189	0.722	1.344	-0.977	0.06	1.347	-0.453	1.224	0.098	1.504	-0.174	1.962	0.992	2.081
[truncated: 3,765 more rows]
[truncated: 19 more columns]
